# Supplementary material for: Meta-analysis of plant growth-promoting rhizobacteria interaction with host plants: implications for drought stress response gene expression
Source: Front Plant Sci. 2024 Jan 15;14:1282553. doi: 10.3389/fpls.2023.1282553 (PMC10823023; doi:10.3389/fpls.2023.1282553)
Supplement: Supplementary file 16 [file Table_1.xlsx]

## Sheet: Foglio1
Keywords	Source	Title	Author	Abstract	Accepted/rejected	Reason
ACS'+ 'gene expression'+ 'drought stress' + ' plants'+ 'PGPR'	Google scholar	Pseudomonas putida attunes morphophysiological, biochemical and molecular responses in Cicer arietinum L. during drought stress and recovery	Tiwari et al., 2016	Drought is one of the most important abiotic stresses that adversely affect plant growth and yield po- tential. However, some drought resistant rhizosphere competent bacteria are known to improve plant health and promote growth during abiotic stresses. Present study showed the role of Pseudomonas putida MTCC5279 (RA) in ameliorating drought stress on cv. BG-362 (desi) and cv. BG-1003 (kabuli) chi…	Accepted
ACS'+ 'gene expression'+ 'drought stress' + ' plants'+ 'PGPR'	Google scholar	Southern blight disease of tomato control by 1-aminocyclopropane-1-carboxylate (ACC) deaminase producing Paenibacillus lentimorbus B-30488	Dixi et al., 2016	Tomato cultivation is highly susceptible for soil born diseases and among them southern blight disease caused by Scelerotium rolfsii is very common. For its management use of chemical fungicides is not very successful as their spores are able to survive for many years in the soil. As an alternative eco-friendly approach to control the disease antagonistic microbes are being characterized.Among th…	Rejected	Biotic stress
ACS'+ 'gene expression'+ 'drought stress' + ' plants'+ 'PGPR'	Google scholar	Gene expression profiling of tomato roots interacting with Pseudomonas fluorescens unravels the molecular reprogramming that occurs during the early phases of colonization	Scotti et al.,2019	The concerns of people over the wide use of chemicals are determining an increasing attention to more eco-friendly management practices in agriculture. Plant growth promoting rhizobacteria (PGPR) are emerging as important beneficial microbial inoculants because of their capability to promote plant growth and improve plant protection. We performed RNASeq to analyze gene expression profiling at 24,…	Rejected	No abiotic stress
ACS'+ 'gene expression'+ 'drought stress' + ' plants'+ 'PGPR'	Google scholar	Plant Growth-Promoting Microbes for Sustainable Biotic and Abiotic Stress Management	Monteiro et al., 2021		Rejected	Book
ACS'+ 'gene expression'+ 'drought stress' + ' plants'+ 'PGPR'	Google scholar	Mechanisms of the IAA and ACC- deaminase producing strain of Trichoderma longibrachiatum T6 in enhancing wheat seedling tolerance to NaCl stress	Zhang et al., 2019	Background: Trichoderma species, a class of plant beneficial fungi, may provide opportunistic symbionts to induce plant tolerance to abiotic stresses. Here, we determined the possible mechanisms responsible for the indole acetic acid (IAA) and 1-aminocyclopropane-1-carboxylate-deaminase (ACC-deaminase) producing strain of Trichoderma longibrachiatum T6 (TL-6) in promoting wheat (Triticum aestivum…	Rejected	Fungi
ACS'+ 'gene expression'+ 'drought stress' + ' plants'+ 'PGPR'	Google scholar	Role of microorganisms in adaptation of agriculture crops to abiotic stresses	Grover et al., 2011	Increased incidences of abiotic and biotic stresses impacting productivity in principal crops are being witnessed all over the world. Extreme events like prolonged droughts, intense rains and flooding, heat waves and frost damages are likely to further increase in future due to cli- mate change. A wide range of adaptations and mitigation strategies are required to cope with such impacts. Efficien…	Rejected	Review
ACS'+ 'gene expression'+ 'drought stress' + ' plants'+ 'PGPR'	Google scholar	Profiling of ACC synthase gene (ACS11) expression in Arabidopsis induced by abiotic stresses	Eun et al., 2019	Abiotic stress induce the production of 1‐aminocyclopropane‐1‐carboxylate (ACC), the precursor of ethylene by activating the enzyme ACC synthase. There are twelve ACC synthase genes reported in the genome of Arabidopsis, and the ACC synthase 11 (ACS11) gene encodes a polypeptide that is functional; however, its involvement in ethylene biosynthesis in response to abiotic stresses remains unclear. …	Rejected	No PGPR
ACS'+ 'gene expression'+ 'drought stress' + ' plants'+ 'PGPR'	Google scholar	Bio-prospecting of ACC deaminase producing Rhizobacteria towards sustainable agriculture: A special emphasis on abiotic stress in plants	Murali et al., 2021	In agriculture, eco-friendly management practices worldwide are required to enhance food security under the changing agro-climatic environmental conditions with avoiding the use of harmful chemicals. Plant growth promoting rhizobacteria (PGPR) is a group of soil microbes closely associated with roots and capable of improving plant growth. 1-Aminocyclopropane-1-carboxylic acid (ACC) deaminase prod…	Rejected	Review
ACS'+ 'gene expression'+ 'drought stress' + ' plants'+ 'PGPR'	Google scholar	Effects of plant growth-promoting rhizobacteria strains producing ACC deaminase on photosynthesis, isoprene emission, ethylene formation and growth of Mucuna pruriens (L.) DC. in response to water deficit	Brunetti et al., 2021	Agricultural sustainability is an increasing need considering the challenges posed by climate change and rapid human population growth. The use of plant growth-promoting rhizobacteria (PGPR) may represent an excellent, new agriculture practice to improve soil quality while promoting growth and yield of important crop species subjected to water stress conditions. In this study, two PGPR strains wi…	Accepted
ACS'+ 'gene expression'+ 'drought stress' + ' plants'+ 'PGPR'	Google scholar	Alleviation of drought stress in pulse crops with ACC deaminase producing rhizobacteria isolated from acidic soil of Northeast India	Saikia et al., 2021	The agricultural crops are often affected by the scarcity of fresh water. Seasonal drought is a major constraint on Northeast Indian agriculture. Almost 80% of the agricultural land in this region is acidic and facing severe drought during the winter period. Apart from classical breeding and transgenic approaches, the application of plant-growth-promoting bacteria (PGPB) is an alternative strateg…	Accepted
ACS'+ 'gene expression'+ 'drought stress' + ' plants'+ 'PGPR'	Google scholar	Unravelling the biochemistry and genetics of ACC deaminase-An enzyme alleviating the biotic and abiotic stress in plants	Gupta et al., 2019	The enzyme 1-aminocyclopropane-1-carboxylate (ACC) deaminase is known for alleviating the adverse effects of ethylene generated in response various stressors. Phylogenetic analysis of corresponding gene encoding ACC degrading enzyme (acds) reveals their occurrence in diverse group of bacteria and fungi. The transcription of acds gene is tightly regulated and expresses differentially under differe…	Rejected	Review
ACS'+ 'gene expression'+ 'drought stress' + ' plants'+ 'PGPR'	Google scholar	Plant Growth-Promoting Rhizobacteria: Context, Mechanisms of Action, and Roadmap to Commercialization of Biostimulants for Sustainable Agriculture	Backer et al., 2018	Microbes of the phytomicrobiome are associated with every plant tissue and, in combination with the plant form the holobiont. Plants regulate the composition and activity of their associated bacterial community carefully. These microbes provide a wide range of services and benefits to the plant; in return, the plant provides the microbial community with reduced carbon and other metabolites. Soils…	Rejected	Review
ACS'+ 'gene expression'+ 'drought stress' + ' plants'+ 'PGPR'	Google scholar	Plant Growth Promoting Endophytes and their Interaction with Plants to Alleviate Abiotic Stress	Vardharajula et al., 2017	Background: There is a growing interest in utilizing endophytes as biofertilizers or biological controls. Beneficial effects may be obtained by synthesizing phytohormones, enzymes and antagonistic substanc- es, fixing nitrogen and carbon dioxide, inducing defence mechanisms and competing colonizing sites and nutrients. Endophytes enhance plant growth and health through plant growth promoting rhiz…	Rejected	Review
ACS'+ 'gene expression'+ 'drought stress' + ' plants'+ 'PGPR'	Google scholar	Effects of plant growth-promoting rhizobacteria on the molecular responses of maize under drought and heat stresses: A review	NOTUNUNU et al., 2022	Drought and heat are major environmental stresses that continually influence plant growth and development. Under field conditions, these stresses occur more frequently in combination than alone, which magnifies corresponding detrimental effects on the growth and productivity of agriculturally important crops. Plant responses to such abiotic stresses are quite complex and manifested in a range of …	Rejected	Review
ACS'+ 'gene expression'+ 'drought stress' + ' plants'+ 'PGPR'	Google scholar	Microbes in Cahoots with Plants: MIST to Hit the Jackpot of Agricultural Productivity during Drought	Kaushal et al., 2019	Drought conditions marked by water deficit impede plant growth thus causing recurrent decline in agricultural productivity. Presently, research efforts are focussed towards harnessing the potential of microbes to enhance crop production during drought. Microbial communities, such as arbuscular mycorrhizal fungi (AMF) and plant growth-promoting rhizobacteria (PGPR) buddy up with plants to boost cr…	Rejected	Review
ACS'+ 'gene expression'+ 'drought stress' + ' plants'+ 'PGPR'	Google scholar	Enhancement of drought stress tolerance in crops by plant growth promoting rhizobacteria	Vurukonda et al., 2016	Drought is one of the major constraints on agricultural productivity worldwide and is likely to further increase. Several adaptations and mitigation strategies are required to cope with drought stress. Plant growth promoting rhizobacteria (PGPR) could play a significant role in alleviation of drought stress in plants. These beneficial microorganisms colonize the rhizosphere/endo-rhizosphere of pl…	Rejected	Review
ACS'+ 'gene expression'+ 'drought stress' + ' plants'+ 'PGPR'	Google scholar	MODULATION OF BARLEY (Hordeum vulgare) DEFENSE AND HORMONAL PATHWAYS BY PSEUDOMONAS SPECIES ACCOUNTED FOR SALINITY TOLERANCE	Zaib et al., 2020	In the present study, we investigated two Pseudomonas species strains (P. fluorescens SBW25 and P. putida KT2440) for their use in plant tolerance under salt stressed condition. Barley (Hordeum vulgare L.) plants inoculated with PGPR strains were subjected to 200mM salinity stress and were analyzed in comparison to non-treated stressed plants based on height, leaf area and fresh and dry weights o…	Rejected	No drought stress
ACS'+ 'gene expression'+ 'drought stress' + ' plants'+ 'PGPR'	Google scholar	1‐Aminocyclopropane-1-carboxylate (ACC) Deaminase Gene in Pseudomonas azotoformans Is Associated with the Amelioration of Salinity Stress in Tomato	Liu et al., 2021	Although bacteria with 1-aminocyclopropane-1-carboxylate (ACC) deaminase activity have been used to mitigate biotic and abiotic stresses in crops, it is not well known whether the ACC deaminase gene (acdS) in Pseudomonas azotoformans is related to the alleviation of salt stress by the bacterium. This study aimed to evaluate the effects of acdS in P. azotoformans strain CHB 1107 on the nutrient up…	Rejected	No ACS
ACS'+ 'gene expression'+ 'drought stress' + ' plants'+ 'PGPR'	Google scholar	Rhizobacterial-plant interactions: Strategies ensuring plant growth promotion under drought and salinity stress	Kaushal et al., 2016	Drought and salinity are major environmental stresses resulting in secondary stresses such as osmotic and oxidative stress (common to both stresses) as well as ionic stress (during salinity) causing alterations in physiological, biochemical and molecular processes in plants resulting in substantial loss to crop productivity. The major physiological parameters studied in plants during stressed con…	Rejected	Review
ACS'+ 'gene expression'+ 'drought stress' + ' plants'+ 'PGPR'	Google scholar	Microbial trehalose boosts the ecological fitness of biocontrol agents, the viability of probiotics during long-term storage and plants tolerance to environmental-driven abiotic stress	Onwe et al., 2022	Despite the impressive gain in agricultural production and greater availability of food, a large portion of the world population is affected by food shortages and nutritional imbalance. This is due to abiotic stresses encountered by plants as a result of environmental-driven perturbations, loss of viability of starter cultures (probiotics) for func- tional foods during storage as well as the vuln…	Rejected	Review
ACS'+ 'gene expression'+ 'drought stress' + ' plants'+ 'PGPR'	Google scholar	Plants Saline Environment in Perception with Rhizosphere Bacteria Containing 1-Aminocyclopropane-1-Carboxylate Deaminase	Bomle et al.,2021	Soil salinity stress has become a serious roadblock for food production worldwide since it is one of the key factors affecting agricultural productivity. Salinity and drought are predicted to cause considerable loss of crops. To deal with this difficult situation, a variety of strategies have been developed, including plant breeding, plant genetic engineering, and a wide range of agricultural pra…	Rejected	Review
ACS'+ 'gene expression'+ 'drought stress' + ' plants'+ 'PGPR'	Google scholar	Transcriptomics of Biostimulation of Plants Under Abiotic Stress	González-Morales et al., 2021	Plant biostimulants are compounds, living microorganisms, or their constituent parts that alter plant development programs. The impact of biostimulants is manifested in several ways: via morphological, physiological, biochemical, epigenomic, proteomic, and transcriptomic changes. For each of these, a response and alteration occur, and these alterations in turn improve metabolic and adaptive perfo…	Rejected	Review
ACS'+ 'gene expression'+ 'drought stress' + ' plants'+ 'PGPR'	Google scholar	Drought Tolerance Strategies in Plants: A Mechanistic Approach	Ilyas et al., 2021	Anthropogenic activities in the past and present eras have created global warming and consequently a storm of drought stress, affecting both plants and animals. Being sessile, plants are more vulnerable to drought stress and consequently reduce plant growth and yield. To mitigate the effects of drought stress on plants, it is very crucial to determine the plant response mechanisms against drought…	Rejected	Review
ACS'+ 'gene expression'+ 'drought stress' + ' plants'+ 'PGPR'	Google scholar	ACC deaminase containing endophytic bacteria ameliorate salt stress in Pisum sativum through reduced oxidative damage and induction of antioxidative defense systems	Sofy et al., 2021	Approximately 6% of the world’s total land area and 20% of the irrigated land are affected by salt stress. Egypt is one such country affected by salt-stress problems. This paper focuses on the role of isolated bacteria, such as Bacillus subtilis and Pseudomonas fluorescens, in alleviating the harmful effects of salt stress. The results show that the irrigation of plants with different concentrati…	Rejected	Review
ACS'+ 'gene expression'+ 'drought stress' + ' plants'+ 'PGPR'	Google scholar	Role of nanoparticles in crop improvement and abiotic stress management	Singh et al., 2021	Nanoparticles (NPs) possess specific physical and chemical features and they are capable enough to cross cellular barriers and show their effect on living organisms. Their capability to cross cellular barriers have been noticed for their application not only in medicine, electronics, chemical and physical sciences, but also in agriculture. In agriculture, nanotechnology can help to improve the gr…	Rejected	Review
ACS'+ 'gene expression'+ 'drought stress' + ' plants'+ 'PGPR'	Google scholar	Recent advances in physiological and molecular mechanisms of heavy metal accumulation in plants	Feki et al., 2021	Among abiotic stress, the toxicity of metals impacts negatively on plants’ growth and productivity. This toxicity promotes various perturbations in plants at different levels. To withstand stress, plants involve efficient mechanisms through the impli- cation of various signaling pathways. These pathways enhance the expression of many target genes among them gene coding for metal transporters. Var…	Rejected	Review
ACS'+ 'gene expression'+ 'drought stress' + ' plants'+ 'PGPR'	Google scholar	Shaping Durum Wheat for the Future: Gene Expression Analyses and Metabolites Profiling Support the Contribution of BCAT Genes to Drought Stress Response.	Buffagni et al., 2020	Global climate change, its implications for agriculture, and the complex scenario presented by the scientific community are of worldwide concern. Drought is a major abiotic stress that can restrict plants growth and yields, thus the identification of genotypes with higher adaptability to drought stress represents one of the primary goals in breeding programs. During abiotic stress, metabolic adap…	Rejected	No PGPR
ACS'+ 'gene expression'+ 'drought stress' + ' plants'+ 'PGPR'	Google scholar	Comparative Digital Gene Expression Analysis of the Arabidopsis Response to Volatiles Emitted by Bacillus amyloliquefaciens	Hao et al., 2016	Some plant growth-promoting rhizobacteria (PGPR) regulated plant growth and elicited plant basal immunity by volatiles. The response mechanism to the Bacillus amyloliquefaciens vol- atiles in plant has not been well studied. We conducted global gene expression profiling in Arabidopsis after treatment with Bacillus amyloliquefaciens FZB42 volatiles by Illumina Digi- tal Gene Expression (DGE) profi…	Rejected	No abiotic stress
ACS'+ 'gene expression'+ 'drought stress' + ' plants'+ 'PGPR'	Google scholar	Metabolomics Provides Valuable Insight for the Study of Durum Wheat: A Review	Saia et al.,2019	Metabolomics is increasingly being applied in various fields offering a highly informative tool for high-throughput diagnostics. However, in plant sciences, metabolomics is underused, even though plant studies are relatively easy and cheap when compared to those on humans and animals. Despite their importance for human nutrition, cereals, and especially wheat, remain understudied from a metabolom…	Rejected	Review
ACS'+ 'gene expression'+ 'drought stress' + ' plants'+ 'PGPR'	Google scholar	Plant Growth Promoting Rhizobacteria for Sustainable Stress Management Volume 1: Rhizobacteria in Abiotic Stress Management	Priyanka et al., 2019		Rejected	Book
ACS'+ 'gene expression'+ 'drought stress' + ' plants'+ 'PGPR'	Google scholar	A Functional Genomic Perspective on Drought Signalling and its Crosstalk with Phytohormone-mediated Signalling Pathways in Plants	Tiwari et al., 2017	Abstract: Introduction: Drought stress is one of the most important abiotic stresses that negatively influence crop performance and productivity. Plants acclimatize to drought stress conditions through altered molecular, biochemical and physiological responses. Gene and/or protein expression and regu- lation are thought to be modulated upon stress perception and signal transduction for providing …	Rejected	Review
ACS'+ 'gene expression'+ 'drought stress' + ' plants'+ 'PGPR'	Google scholar	Secondary Metabolites From Halotolerant Plant Growth Promoting Rhizobacteria for Ameliorating Salinity Stress in Plants	Sunita et al., 2020	Soil salinization has emerged as one of the prime environmental constraints endangering soil quality and agricultural productivity. Anthropogenic activities coupled with rapid pace of climate change are the key drivers of soil salinity resulting in degradation of agricultural lands. Increasing levels of salt not only impair structure of soil and its microbial activity but also restrict plant grow…	Rejected	Review
ACS'+ 'gene expression'+ 'drought stress' + ' plants'+ 'PGPR'	Google scholar	Toxicogenomic Responses of the Model Legume Medicago truncatula to Aged Biosolids Containing a Mixture of Nanomaterials (TiO2, Ag, and ZnO) from a Pilot Wastewater Treatment Plant	Chen et al., 2015	ABSTRACT: Toxicogenomic responses in Medicago truncatula A17 were monitored following exposure to biosolids-amended soils. Treatments included biosolids produced using a pilot wastewater treatment plant with either no metal introduced into the influent (control); bulk/ionic TiO2, ZnO, and AgNO3 added to influent (bulk/dissolved treatment); or Ag, ZnO, and TiO2 engineered nanomaterials added to in…	Rejected	No abiotic stress
ACS'+ 'gene expression'+ 'drought stress' + ' plants'+ 'PGPR'	Google scholar	ACC deaminase‐producing rhizosphere competent Bacillus spp. mitigate salt stress and promote Zea mays growth by modulating ethylene metabolism	Misra-Chauhan,2020	Plant growth-promoting rhizobacteria (PGPR) are known for growth promotion and mitigating environmental stresses. Here, we examined the propitiousness of three indigenous salt-tolerant PGPR, i.e., Bacillus subtilis (NBRI 28B), B. subtilis (NBRI 33 N), and B. safensis (NBRI 12 M) for plant growth promotion and salt stress amelioration in Zea mays. Results of the in vitro plant growth-promoting att…	Rejected	Proteomic study
ACS'+ 'gene expression'+ 'drought stress' + ' plants'+ 'PGPR'	Google scholar	Physiological Mechanisms and Adaptation Strategies in Plants Under Changing Environment Volume 2	Ahmad et al., 2014		Rejected	Book
ACS'+ 'gene expression'+ 'drought stress' + ' plants'+ 'PGPR'	Google scholar	Water Conservation and Plant Survival Strategies of Rhizobacteria under Drought Stress	Khan et al., 2020	Abstract: Drylands are stressful environment for plants growth and production. Plant growth-promoting rhizobacteria (PGPR) acts as a rampart against the adverse impacts of drought stress in drylands and enhances plant growth and is helpful in agricultural sustainability. PGPR improves drought tolerance by implicating physio-chemical modifications called rhizobacterial-induced drought endurance an…	Rejected	Review
ACS'+ 'gene expression'+ 'drought stress' + ' plants'+ 'PGPR'	Google scholar	Review on Drought Tolerance in Plants Induced by Plant Growth Promoting Rhizobacteria	Dar et al., 2018	Abiotic stresses are major constrains which adversely affect the plant growth and productivity. Among all abiotic stresses, drought is considered as one of the major constraints on agricultural productivity worldwide and is likely to further increase. Hence the need of the hour is to formulate the strategies that can minimize the loss in crop production under drought conditions. One of them being…	Rejected	Review
ACS'+ 'gene expression'+ 'drought stress' + ' plants'+ 'PGPR'	Google scholar	Exogenous Spermidine Inhibits Ethylene Production in Leaves of Cucumber Seedlings under NaCl Stress	Li et al., 2013	ABSTRACT. To examine whether 1 mM of spermidine (Spd) modifies plant ethylene production in response to short- term salt stress, cucumber (Cucumis sativus) seedlings were grown in nutrient solution with or without 75 mM NaCl stress for 3 days, and the leaves were sprayed with 1 mM Spd or water (control). We investigate the effects of the treatments on ethylene production, 1-aminocyclopropane-1-ca…	Rejected	No drought stress
ACS'+ 'gene expression'+ 'drought stress' + ' plants'+ 'PGPR'	Google scholar	Phytohormone Priming: Regulator for Heavy Metal Stress in Plants	Sytar et al., 2019	Phytohormones act as chemical messengers and, under a complex regulation, allow plants to sustain biotic and abiotic stresses. Thus, phytohormones are known for their regulatory role in plant growth and development. Heavy metals (HMs) play an important role in metabolism and have roles in plant growth and development as micronutrients. However, at a level above threshold, these HMs act as contami…	Rejected	Review
ACS'+ 'gene expression'+ 'drought stress' + ' plants'+ 'PGPR'	Google scholar	Plant growth promoting rhizobacteria induced Cd tolerance in Lycopersicon esculentum through altered antioxidative defense expression	Khanna et al., 2019	The present study was designed to determine the role of plant growth-promoting rhizobacteria (Pseu- domonas aeruginosa & Burkholderia gladioli) in alleviating Cd stress in Lycopersicon esculentum. Cd con- centration of 0.4 mM enhanced superoxide anions, MDA and H2O2 by 136%, 378% and 137% that also caused nuclear and cell viability damage. Cd enhanced the activities of enzymatic antioxidants such…	Rejected	No ACS
ACS'+ 'gene expression'+ 'drought stress' + ' plants'+ 'PGPR'	Google scholar	Action of jasmonates in plant stress responses and development — Applied aspects	Wasternack, 2014	Jasmonates (JAs) are lipid-derived compounds acting as key signaling compounds in plant stress responses and development. The JA co-receptor complex and several enzymes of JA biosynthesis have been crystallized, and various JA signal transduction pathways including cross-talk to most of the plant hormones have been intensively studied. Defense to herbivores and necrotrophic pathogens are mediated…	Rejected	Review
ACS'+ 'gene expression'+ 'drought stress' + ' plants'+ 'PGPR'	Google scholar	Regulation of Ethylene Biosynthesis	Argueso et al., 2007	The biosynthesis of the gaseous phytohormone ethylene is a highly regulated process. A major point of regulation occurs at the generally rate- limiting step in biosynthesis, catalyzed by the en- zyme ACC synthase (ACS). ACS is encoded by a multigene family, and different members show distinct patterns of expression during growth and development, and in response to various external cues. In additi…	Rejected	Review
ACS'+ 'gene expression'+ 'drought stress' + ' plants'+ 'PGPR'	Google scholar	Plant Growth Promotion Under Water: Decrease of Waterlogging-Induced ACC and Ethylene Levels by ACC Deaminase-Producing Bacteria	Ali et al., 2018	Some plant growth-promoting bacteria encode for 1-aminocyclopropane-1-carboxylate (ACC) deaminase, which facilitates plant growth and development by lowering the level of stress ethylene under waterlogged conditions. The substrate ACC is the immediate precursor for ethylene synthesis in plants; while bacterial ACC deaminase hydrolyzes this compound into α-ketobutyrate and ammonia to mitigate the …	Rejected	Review
ACS'+ 'gene expression'+ 'drought stress' + ' plants'+ 'PGPR'	Google scholar	Response of Phenylpropanoid Pathway and the Role of Polyphenols in Plants under Abiotic Stress	Sharma et al., 2019	Phenolic compounds are an important class of plant secondary metabolites which play crucial physiological roles throughout the plant life cycle. Phenolics are produced under optimal and suboptimal conditions in plants and play key roles in developmental processes like cell division, hormonal regulation, photosynthetic activity, nutrient mineralization, and reproduction. Plants exhibit increased s…	Rejected	Review
ACS'+ 'gene expression'+ 'drought stress' + ' plants'+ 'PGPR'	Google scholar	Role of Ethylene Biosynthesis Genes in the Regulation of Salt Stress and Drought	Naing et al., 2022	Ethylene plays a critical signaling role in the abiotic stress tolerance mechanism. However, the role of ethylene in regulating abiotic stress tolerance in petunia has not been well- investigated, and the underlying molecular mechanism by which ethylene regulates abiotic stress tolerance is still unknown. Therefore, we examined the involvement of ethylene in salt and drought stress tolerance of p…	Rejected	No PGPR
ACS'+ 'gene expression'+ 'drought stress' + ' plants'+ 'PGPR'	Google scholar	Plant-Microbe Interaction: An Approach to Sustainable Agriculture	Kumari et al.,2017		Rejected	Book
ACS'+ 'gene expression'+ 'drought stress' + ' plants'+ 'PGPR'	Google scholar	Effect of plant growth-promoting Rhizobacteria on plant hormone homeostasis	Tsukanova et al., 2017	Plant growth-promoting rhizobacteria (PGPR) includes a wide variety of bacterial strains from different taxo- nomic groups that inhabit plant roots and their rhizosphere. By bringing about complex changes in plant growth and development, PGPR can enhance both productivity of agricultural crops, and their pathogen resistance. Col- onization by PGPR is associated with changes in plant metabolism, s…	Rejected	Review
ACS'+ 'gene expression'+ 'drought stress' + ' plants'+ 'PGPR'	Google scholar	The intricacy of silicon, plant growth regulators and other signaling molecules for abiotic stress tolerance: An entrancing crosstalk between stress alleviators	Khan et al., 2021	Unfavorable environmental conditions are the critical inimical to the sustainable agriculture. Among various novel strategies designed to protect plants from abiotic stress threats, use of mineral elements as ‘stress miti- gators’ has emerged as the most crucial and interesting aspect. Silicon (Si) is a quasi-essential nutrient that mediates plant growth and development and interacts with plant g…	Rejected	Review
ACS'+ 'gene expression'+ 'drought stress' + ' plants'+ 'PGPR'	Google scholar	Amelioration of Abiotic Stresses Using PGPRs	Rani et al., 2020		Rejected	Book chapter
ACS'+ 'gene expression'+ 'drought stress' + ' plants'+ 'PGPR'	Google scholar	A fruitful decade of bacterial ACC deaminase biotechnology: a pragmatic approach towards abiotic stress relief in plants	Moon-Ali, 2022	Global food security can be achieved through rigorous agricultural security because agriculture is the basis of food. Several reports have shown that environmental stresses greatly affect agriculture productivity around the globe. Abiotic stressors cause the stimulation of ethylene biosynthesis in plants, which is a crucial mediator of environmental stresses in plants. Thus, the mitigation of abi…	Rejected	Review
ACS'+ 'gene expression'+ 'drought stress' + ' plants'+ 'PGPR'	Google scholar	Ethylene emission and PR protein synthesis in ACC deaminase producing Methylobacterium spp. inoculated tomato plants (Lycopersicon esculentum Mill.) challenged with Ralstonia solanacearum under greenhouse conditions	Yim et al., 2013	Bacteria of genus Methylobacterium have been found to promote plant growth and regulate the level of ethylene in crop plants. This work is aimed to test the induction of defense responses in tomato against bacterial wilt by stress ethylene level reduction mediated by the ACC deaminase activity of Methyl- obacterium strains. Under greenhouse conditions, the disease index value in Methylobacterium …	Rejected	Biotic stress
ACS'+ 'gene expression'+ 'drought stress' + ' plants'+ 'PGPR'	Google scholar	The Role of Ethylene in Plants Under Salinity Stress	Tao et al., 2015	Although the roles of ethylene in plant response to salinity and other stresses have been extensively studied, there are still some obscure points left to be clarified. Generally, in Arabidopsis and many other terrestrial plants, ethylene signaling is indispensable for plant rapid response and tolerance to salinity stress. However, a few studies showed that functional knock-out of some ACSs incre…	Rejected	Review
ACS'+ 'gene expression'+ 'drought stress' + ' plants'+ 'PGPR'	Google scholar	Cadmium Immobilization in the Rhizosphere and Plant Cellular Detoxification: Role of Plant-Growth-Promoting Rhizobacteria as a Sustainable Solution	Halim et al., 2020.	ABSTRACT: Food is the major cadmium (Cd)-exposure pathway from agricultural soils to humans and other living entities and must be reduced in an effective way. A plant can select beneficial microbes, like plant-growth-promoting rhizobacteria (PGPR), depending upon the nature of root exudates in the rhizosphere, for its own benefits, such as plant growth promotion as well as protection from metal t…	Rejected	Review
ACS'+ 'gene expression'+ 'drought stress' + ' plants'+ 'PGPR'	Google scholar	Arbuscular Mycorrhiza-Mediated Regulation of Polyamines and Aquaporins During Abiotic Stress: Deep Insights on the Recondite Players	Sharma et al., 2021	Environmental stresses of (a)biotic origin induce the production of multitudinous compounds (metabolites and proteins) as protective defense mechanisms in plants. On account of the regulation of some of these compounds, arbuscular mycorrhizal fungi (AMF) reinforce the inherent tolerance of plants toward the stress of different origins and kind. This article reviews two specific fundamental mechan…	Rejected	Review
ACS'+ 'gene expression'+ 'drought stress' + ' plants'+ 'PGPR'	Google scholar	Rhizobacteriome: Promising Candidate for Conferring Drought Tolerance in Crops	Yadav et al., 2020	Drought is a global water shortage problem which poses challenge to crop productivity. Novel strategies are being tried to find out solution to sustain agriculture under drought conditions. Rhizobacteriome is an exclusive genetic material of bacteria resident to rhizosphere plays critical role to health and yield of plant. The interaction of rhizobacteriome with plant provides basis for protectin…	Rejected	Review
ACS'+ 'gene expression'+ 'drought stress' + ' plants'+ 'PGPR'	Google scholar	Accumulation and Transport of 1-Aminocyclopropane-1-Carboxylic Acid (ACC) in Plants: Current Status, Considerations for Future Research and Agronomic Applications	Vanderstraeten et al., 2017	1-aminocyclopropane-1-carboxylic acid (ACC) is a non-protein amino acid acting as the direct precursor of ethylene, a plant hormone regulating a wide variety of vegetative and developmental processes. ACC is the central molecule of ethylene biosynthesis. The rate of ACC formation differs in response to developmental, hormonal and environmental cues. ACC can be conjugated to three derivatives, met…	Rejected	Review
ACS'+ 'gene expression'+ 'drought stress' + ' plants'+ 'PGPR'	Google scholar	Phomopsis liquidambaris reduces ethylene biosynthesis in rice under salt stress via inhibiting the activity of 1‐aminocyclopropane‐1‐carboxylate deaminase	Siddikee et al.,2021	The endophytic fungus Phomopsis liquidambaris is characterized as a plant growth-promoting agent under salt stress, but its mechanism is unknown. Herein, 1-aminocyclopropane-1-carboxylate deaminase (ACCD) from the strain was confirmed that it had the ability of utilizing 1-aminocyclopropane-1-carboxylate as the sole nitrogen source. The full-length ACCD gene was 1152 bp, which encodes a mature pr…	Rejected	No drought stress
ACS'+ 'gene expression'+ 'drought stress' + ' plants'+ 'PGPR'	Google scholar	Nanofertilizers for sustainable fruit production: a review	Sharma et al., 2021	The demand for quality food is expected to increase with the rising population across the globe. Fruits are a major source of nutraceuticals, yet nutrient depletion in soils is altering fruit cultivation. Conventional fertilizers have raised food produc- tion after the green revolution, yet intensive agriculture has induced soil degradation and food contamination by pesticides. Conventional ferti…	Rejected	Review
ACS'+ 'gene expression'+ 'drought stress' + ' plants'+ 'PGPR'	Google scholar	Transcriptomic and metabolomic analyses reveal that bacteria promote plant defense during infection of soybean cyst nematode in soybean	Kang et al., 2018	Background: Soybean cyst nematode (SCN) is the most devastating pathogen of soybean. Our previous study showed that the plant growth-promoting rhizobacterium Bacillus simplex strain Sneb545 promotes soybean resistance to SCN. Here, we conducted a combined metabolomic and transcriptomic analysis to gain information regarding the biological mechanism of defence enhancement against SCN in Sneb545-tr…	Rejected	Biotic stress
ACS'+ 'gene expression'+ 'drought stress' + ' plants'+ 'PGPR'	Google scholar	Bacterial-Mediated Tolerance and Resistance to Plants Under Abiotic and Biotic Stresses	Choudhary et al., 2016	Plant growth-promoting bacteria (PGPB) are capable of alleviating environmental stress and eliciting tolerance in plants to promote their growth. Several PGPB elicit physical and/or chemical changes related to plant defense in the form of induced systemic resistance (ISR) under biotic stress. Researchers emphasized that PGPB- elicited ISR has suppressed plant diseases caused by a range of pathoge…	Rejected	Review
ACS'+ 'gene expression'+ 'drought stress' + ' plants'+ 'PGPR'	Google scholar	Plant Biotic Interactions State of the Art	Varma et al., 2019		Rejected	Book
ACS'+ 'gene expression'+ 'drought stress' + ' plants'+ 'PGPR'	Google scholar	Engineering rhizobacteria for sustainable agriculture	Haskett et al., 2021	Exploitation of plant growth promoting (PGP) rhizobacteria (PGPR) as crop inoculants could propel sustainable intensification of agriculture to feed our rapidly growing population. However, field performance of PGPR is typically inconsistent due to suboptimal rhizosphere colonisation and persistence in foreign soils, promiscuous host-specificity, and in some cases, the existence of undesirable ge…	Rejected	Review
ACS'+ 'gene expression'+ 'drought stress' + ' plants'+ 'PGPR'	Google scholar	Transcriptomic profiling of maize (Zea mays L.) seedlings in response to Pseudomonas putida stain FBKV2 inoculation under drought stress	SkZ et al., 2018	Several mechanisms have been proposed for plant growth-promoting rhizobacteria (PGPR)-mediated drought stress tolerance in plants, but little is known about the molecular pathways involved in the drought tolerance promoted by PGPR. We, therefore, aim to study the differential gene response between Pseudomonas putida strain FBKV2 and maize interaction under drought stress using Illumina sequencing…	Accepted
ACS'+ 'gene expression'+ 'drought stress' + ' plants'+ 'PGPR'	Google scholar	Biotechnological strategies for enhancing heavy metal tolerance in neglected and underutilized legume crops: A comprehensive review	Rai et al., 2021	Contamination of agricultural land and water by heavy metals due to rapid industrialization and urbanization including various natural processes have become one of the major constraints to crop growth and productivity. Several studies have reported that to counteract heavy metal stress, plants should be able to maneuver various physiological, biochemical and molecular processes to improve their g…	Rejected	Review
ACS'+ 'gene expression'+ 'drought stress' + ' plants'+ 'PGPR'	Google scholar	Enhanced Iron Uptake in Plants by Volatile Emissions of Rahnella aquatilis JZ-GX1	Kong et al., 2021	Iron deficiency in soil has crucially restricted agricultural and forestry production. Volatile organic compounds (VOCs) produced by beneficial microorganisms have been proven to play an important role in inducing abiotic stress tolerance in plants. We investigated the effects of VOCs released by the rhizobacterium Rahnella aquatilis JZ-GX1 on the growth and root parameters of Arabidopsis thalian…	Rejected	No ACS
ACS'+ 'gene expression'+ 'drought stress' + ' plants'+ 'PGPR'	Google scholar	Simultaneous and sequential based co-fermentations of Trichoderma asperellum GDFS1009 and Bacillus amyloliquefaciens 1841: a strategy to enhance the gene expression and metabolites to improve the bio-control and plant growth promoting activity	Karuppiah et al., 2019	Background: The consequence of simultaneous and sequential inoculation of T. asperellum and B. amyloliquefaciens cultures with respect to growth rate, differential expression of vital genes and metabolites were examined. Results: The competition was observed between T. asperellum and B. amyloliquefaciens under co-cultivation. The proliferation of Trichoderma was reduced in the simultaneous inocul…	Rejected	Fungi
ACS'+ 'gene expression'+ 'drought stress' + ' plants'+ 'PGPR'	Google scholar	Plant growth-promoting rhizobacteria (PGPR): emergence in agriculture	Bhattacharyya-Jha, 2012	Plant growth-promoting rhizobacteria (PGPR) are the rhizosphere bacteria that can enhance plant growth by a wide variety of mechanisms like phosphate solubilization, siderophore production, biological nitrogen fixation, rhizo- sphere engineering, production of 1-Aminocyclopropane-1- carboxylate deaminase (ACC), quorum sensing (QS) signal interference and inhibition of biofilm formation, phytohor-…	Rejected	Review
ACS'+ 'gene expression'+ 'drought stress' + ' plants'+ 'PGPR'	Google scholar	A Complex Molecular Interplay of Auxin and Ethylene Signaling Pathways Is Involved in Arabidopsis Growth Promotion by Burkholderia phytofirmans PsJN.	Poupin et al., 2016	Modulation of phytohormones homeostasis is one of the proposed mechanisms to explain plant growth promotion induced by beneficial rhizobacteria (PGPR). However, there is still limited knowledge about the molecular signals and pathways underlying these beneficial interactions. Even less is known concerning the interplay between phytohormones in plants inoculated with PGPR. Auxin and ethylene are c…	Rejected	No drought stress
ACS'+ 'gene expression'+ 'drought stress' + ' plants'+ 'PGPR'	Google scholar	Ethylene induced plant stress tolerance by Enterobacter sp. SA187 is mediated by 2-keto- 4-methylthiobutyric acid production	de Zélicourt et al., 2018	Several plant species require microbial associations for survival under different biotic and abiotic stresses. In this study, we show that Enterobacter sp. SA187, a desert plant endo- phytic bacterium, enhances yield of the crop plant alfalfa under field conditions as well as growth of the model plant Arabidopsis thaliana in vitro, revealing a high potential of SA187 as a biological solution for …	Rejected	No drought stress
ACS'+ 'gene expression'+ 'drought stress' + ' plants'+ 'PGPR'	Google scholar	Comparative physiological and Metabolic Analysis Reveals a Complex Mechanism Involved in Drought tolerance in Chickpea (Cicer arietinum L.) Induced by pGpR and pGRs	Khan et al., 2019	The plant growth promoting rhizobacteria (pGpR) and plant growth regulators (pGRs) can be applied to improve the growth and productivity of plants, with potential to be used for genetic improvement of drought tolerance. However, for genetic improvement to be achieved, a solid understanding of the physiological and biochemical changes in plants induced by pGpR and pGR is required. the present stud…	Rejected	No ACS
ACS'+ 'gene expression'+ 'drought stress' + ' plants'+ 'PGPR'	Google scholar	Multifaceted Interactions Between Endophytes and Plant: Developments and Prospects	Khare et al., 2018	Microbial endophytes are present in all known plant species. The ability to enter and thrive in the plant tissues makes endophytes unique, showing multidimensional interactions within the host plant. Several vital activities of the host plant are known to be influenced by the presence of endophytes. They can promote plant growth, elicit defense response against pathogen attack, and can act as rem…	Rejected	Review
ACS'+ 'gene expression'+ 'drought stress' + ' plants'+ 'PGPR'	Google scholar	The ACC deaminase-producing plant growth-promoting bacteria: Influences of bacterial strains and ACC deaminase activities in plant tolerance to abiotic stress	Naing et al., 2021	Global climate change results in frequent occurrences and/or long durations of abi- otic stress. Field grown plants are affected by abiotic stress, and they modulate ethyl- ene in response to abiotic stress exposure and use it as a signaling molecule in stress tolerance mechanisms. However, frequent occurrences and/or long durations of stress conditions can cause plants to induce ethylene levels …	Rejected	Review
ACS'+ 'gene expression'+ 'drought stress' + ' plants'+ 'PGPR'	Google scholar	A manipulative interplay between positive and negative regulators of phytohormones: A way forward for improving drought tolerance in plants	Mubarik et al., 2020	Among different abiotic stresses, drought stress is the leading cause of impaired plant growth and low productivity worldwide. It is therefore essential to under- stand the process of drought tolerance in plants and thus to enhance drought resis- tance. Accumulating evidence indicates that phytohormones are essential signaling molecules that regulate diverse processes of plant growth and developm…	Rejected	Review
ACS'+ 'gene expression'+ 'drought stress' + ' plants'+ 'PGPR'	Google scholar	Proteomic Analysis Reveals the Positive Roles of the Plant-Growth-Promoting Rhizobacterium NSY50 in the Response of Cucumber Roots to Fusarium oxysporum f. sp. cucumerinum Inoculation	Du et al., 2016	Plant-growth-promoting rhizobacteria (PGPR) can both improve plant growth and enhance plant resistance against a variety of environmental stresses. To investigate the mechanisms that PGPR use to protect plants under pathogenic attack, transmission electron microscopy analysis and a proteomic approach were designed to test the effects of the new potential PGPR strain Paenibacillus polymyxa NSY50 o…	Rejected	Biotic stress
ACS'+ 'gene expression'+ 'drought stress' + ' plants'+ 'PGPR'	Google scholar	Bacillus velezensis FZB42 in 2018: The Gram-Positive Model Strain for Plant Growth Promotion and Biocontrol	Fan et al., 2018	Bacillus velezensis FZB42, the model strain for Gram-positive plant-growth-promoting and biocontrol rhizobacteria, has been isolated in 1998 and sequenced in 2007. In order to celebrate these anniversaries, we summarize here the recent knowledge about FZB42. In last 20 years, more than 140 articles devoted to FZB42 have been published. At first, research was mainly focused on antimicrobial compou…	Rejected	Review
ACS'+ 'gene expression'+ 'drought stress' + ' plants'+ 'PGPR'	Google scholar	Rhizosphere signaling nurturing phyto-microbiome niche	Jalmi et al., 2020	Abstract: In an ecosystem, terrestrial plants donot exist all alone but live in complex associations with diverse microorganisms. The interaction between plant and microbiome is an outcome of a very long co-evolution. The knowledge of the microbial community in the rhizosphere is getting more transparent due to the advancement of technologies and genetic tools. The functional taxonomy, identifica…	Rejected	Review
ACS'+ 'gene expression'+ 'drought stress' + ' plants'+ 'PGPR'	Google scholar	Unravelling the beneficial role of microbial contributors in reducing the allelopathic effects of weeds	Mishra et al., 2013	The field of allelopathy is one of the most fasci- nating but controversial processes in plant ecology that offers an exciting, interdisciplinary, complex, and challeng- ing study. In spite of the established role of soil microbes in plant health, their role has also been consolidated in studies of allelopathy. Moreover, allelopathy can be better under- stood by incorporating soil microbial ecolo…	Rejected	Review
ACS'+ 'gene expression'+ 'drought stress' + ' plants'+ 'PGPR'	Google scholar	Identification of Endophytic Bacteria and their Characterization as Biocontrol Agents against Tomato Southern Blight Disease	Ribaudo et al., 2016	Objectives: The purpose of the present study was to characterize the endophytic bacterium PAC BNM0522 and to evaluate its role in the ethylene signaling pathway in the development of southern blight disease (caused by the necrotrophic fungus Sclerotium rolfsii) in tomato plants. Methods: In this study, biochemical tests, 16S rRNA gene sequencing, and amplification of the ACCD gene (acdS) were per…	Rejected	BIotic stress
ACS'+ 'gene expression'+ 'drought stress' + ' plants'+ 'PGPR'	Google scholar	Ethylene: A Master Regulator of Salinity Stress Tolerance in Plants	Riyazuddin et al., 2020	Salinity stress is one of the major threats to agricultural productivity across the globe. Research in the past three decades, therefore, has focused on analyzing the effects of salinity stress on the plants. Evidence gathered over the years supports the role of ethylene as a key regulator of salinity stress tolerance in plants. This gaseous plant hormone regulates many vital cellular processes s…	Rejected	Review
ACS'+ 'gene expression'+ 'drought stress' + ' plants'+ 'PGPR'	Google scholar	Approaches to Plant Stress and their Management	Vaishnav		Rejected	Book
ACS'+ 'gene expression'+ 'drought stress' + ' plants'+ 'PGPR'	Google scholar	Comparative Physiological, Biochemical, and Genetic Responses to Prolonged Waterlogging Stress in Okra and Maize Given Exogenous Ethylene Priming	Vwioko et al., 2017	Waterlogging is an environmental challenge affecting crops worldwide. Ethylene induces the expression of genes linked to important agronomic traits under waterlogged conditions. The ability of okra (Abelmoschus esculentus L. Moench.) and maize (Zea mays L.) given exogenous ethylene priming to tolerate prolonged waterlogged conditions was investigated in this study. The investigation was carried o…	Rejected	No PGPR
ACS'+ 'gene expression'+ 'drought stress' + ' plants'+ 'PGPR'	Google scholar	Growing more with less: Breeding and developing drought resilient soybean to improve food security	Dubey et al., 2019	Soybean (Glycine max L.) is considered an important crop, and enhancing its production under drought stress and changing climatic conditions to meet the challenges of global food security is crucial. Drought is considered one of the major abiotic factors that adversely affect soybean production. To address this challenge, we need to develop an integrative research approach that will bring togethe…	Rejected	Review
ACS'+ 'gene expression'+ 'drought stress' + ' plants'+ 'PGPR'	Google scholar	Microbiome Selection Could Spur Next-Generation Plant Breeding Strategies	Gopal et al., 2016	Plants, though sessile, have developed a unique strategy to counter biotic and abiotic stresses by symbiotically co-evolving with microorganisms and tapping into their genome for this purpose. Soil is the bank of microbial diversity from which a plant selectively sources its microbiome to suit its needs. Besides soil, seeds, which carry the genetic blueprint of plants during trans-generational pr…	Rejected	Review
ACS'+ 'gene expression'+ 'drought stress' + ' plants'+ 'PGPR'	Google scholar	Microbiome Selection Could Spur NexT Generation Plant Breeding Strategies	Hardoim et al., 2008	Bacterial endophytes live inside plants for at least part of their life cycle. Studies of the interaction of endophytes with their host plants and their function within their hosts are important to address the ecological relevance of endophytes. The modulation of ethylene levels in plants by bacterially produced 1-aminocyclopropane-1- carboxylate deaminase is a key trait that enables interference…	Rejected	Review
ACS'+ 'gene expression'+ 'drought stress' + ' plants'+ 'PGPR'	Google scholar	Omics: The way forward to enhance abiotic stress tolerance in Brassica napus L	Raza et al., 2021	Plant abiotic stresses negative affects growth and development, causing a massive reduction in global agricultural production. Rapeseed (Brassica napus L.) is a major oilseed crop because of its economic value and oilseed production. However, its productivity has been reduced by many environmental adversities. Therefore, it is a prime need to grow rapeseed cultivars, which can withstand numerous …	Rejected	Review
ACS'+ 'gene expression'+ 'drought stress' + ' plants'+ 'PGPR'	Google scholar	Delay of Postharvest Browning in Litchi Fruit by Melatonin via the Enhancing of Antioxidative Processes and Oxidation Repair	Zhang et al., 2018	Melatonin acts as a crucial signaling and antioxidant molecule with multiple physiological functions in organisms. To explore effects of exogenous melatonin on postharvest browning and its possible mechanisms in litchi fruit, ‘Ziniangxi’ litchi fruits were treated with an aqueous solution of melatonin at 0.4 mM and then stored at 25 °C for 8 days. The results revealed that melatonin strongly supp…	Rejected	No ACS
ACS'+ 'gene expression'+ 'drought stress' + ' plants'+ 'PGPR'	Google scholar	An Engineered Device for Indoleacetic Acid Production under Quorum Sensing Signals Enables Cupriavidus pinatubonensis JMP134 To Stimulate Plant Growth	Zúñiga et al., 2018	he environmental effects of chemical fertilizers and pesticides have encouraged the quest for new strategies to increase crop productivity with minimal impacts on the natural medium. Plant growth promoting rhizobacteria (PGPR) can contribute to this endeavor by improving fitness through better nutrition acquisition and stress tolerance. Using the neutral (non PGPR) rhizobacterium Cupriavidus pina…	Rejected	No ACS
ACS'+ 'gene expression'+ 'drought stress' + ' plants'+ 'PGPR'	Google scholar	Regulation of Plant Mineral Nutrition by Signal Molecules	Kalia et al., 2019	Microbes operate their metabolic activities at a unicellular level. However, it has been revealed that a few metabolic activities only prove beneficial to microbes if operated at high cell den- sities. These cell density-dependent activities termed quorum sensing (QS) operate through specific chemical signals. In Gram-negative bacteria, the most widely reported QS signals are acylhomoserine lacto…	Rejected	Review
ACS'+ 'gene expression'+ 'drought stress' + ' plants'+ 'PGPR'	Google scholar	Comparative Evaluation of Different Salt-Tolerant Plant Growth-Promoting Bacterial Isolates in Mitigating the Induced Adverse Effect of Salinity in Pisum sativum	Gupta et al., 2021	Due to climate change, salinity has become a limiting factor for many leguminous crops. Therefore, we have explored the comparative study of salt-tolerant plant growth-promoting rhizobacteria (PGPR) for the promotion of plant growth. These PGPR (Bacillus subtilis RhStr_71, Bacillus safensis RhStr_223, and Bacillus cereus RhStr_JH5) were in vitro screened for plant growth- promoting (PGP) traits s…	Rejected	No ACS
ACS'+ 'gene expression'+ 'drought stress' + ' plants'+ 'PGPR'	Google scholar	Growing more with less: Breeding and developing drought resilient soybean to improve food security	Dubey et al., 2019		Rejected	Duplicate
ACS'+ 'gene expression'+ 'drought stress' + ' plants'+ 'PGPR'	Google scholar	Transgenic Arabidopsis Expressing acdS Gene of Pseudomonas veronii- KJ Alleviate the Adverse Effects of Salt and Water-Logging Stress	Jung et al., 2018	Several bacterial genes have been identified for the successful transformation of model and crop plants to cope with a variety of stressful conditions. Here, we isolated acdS gene from Pseudomonas veronii- KJ and cloned into Escherichia coli (DE3) for the successful expression of recombinant 1-aminocyclopropane-1-carboxylate (ACC) deaminase. Then, Arabidopsis thaliana was transformed to express t…	Rejected	No ACS
ACS'+ 'gene expression'+ 'drought stress' + ' plants'+ 'PGPR'	Google scholar	Quantitative mRNA Analysis of Induced Genes in Maize Inoculated with Acinetobacter baumannii Strain MZ30V92	Sandhya et al., 2018	Background: Endophytic bacteria release active metabolites by utilizing nutrients secreted by plants and induce gene expression and enhance plant growth under abiotic stresses. Objective: To understand the dynamics of drought markers (27 genes) in endophyte Acinetobacter sp. associated maize under drought compared to control plants using quantitative real-time PCR (qRT- PCR). Method and Result: F…	Accepted
ACS'+ 'gene expression'+ 'drought stress' + ' plants'+ 'PGPR'	Google scholar	Sustainable Agriculture through Multidisciplinary Seed Nanopriming: Prospects of Opportunities and Challenges	Shelar et al., 2021	The global community decided in 2015 to improve people’s lives by 2030 by setting 17 global goals for sustainable development. The second goal of this community was to end hunger. Plant seeds are an essential input in agriculture; however, during their developmental stages, seeds can be negatively affected by environmental stresses, which can adversely affect seed vigor, seedling establishment, a…	Rejected	Review
ACS'+ 'gene expression'+ 'drought stress' + ' plants'+ 'PGPR'	Google scholar	Effects of rhizobacterial ACC deaminase activity on Arabidopsis indicate that ethylene mediates local root responses to plant growth-promoting rhizobacteria	Contesto et al., 2008	1-Amino cyclopropane-1-carboxylic acid deaminase (AcdS) is an enzyme that degrades the precursor of plant hormone ethylene. AcdS activity has been identified in many soil bacteria. It has been proposed to play an important role in plant-growth promotion by rhizobacteria. It would lower ethylene level via uncharacterized signaling pathways in the host plant. To further investigate the role of AcdS…	Rejected	No abiotic stress
ACS'+ 'gene expression'+ 'drought stress' + ' plants'+ 'PGPR'	Google scholar	Expression of an exogenous 1-aminocyclopropane-1-carboxylate deaminase gene in psychrotolerant bacteria modulates ethylene metabolism and cold induced genes in tomato under chilling stress	Subramanian et al., 2015	The role of stress induced ethylene under low temperature stress has been controversial and hitherto remains unclear. In the present study, 1-aminocyclopropane-1-carboxylate deaminase (ACCD) gene, acdS expressing mutant strains were generated from ACCD negative psychrotolerant bacterial strains Fla- vobacterium sp. OR306 and Pseudomonas frederiksbergensis OS211, isolated from agricultural soil du…	Rejected	No ACS
ACS'+ 'gene expression'+ 'drought stress' + ' plants'+ 'PGPR'	Google scholar	Delineation of mechanistic approaches employed by plant growth promoting microorganisms for improving drought stress tolerance in plants	Ali et al., 2021	Drought stress is expected to increase in intensity, frequency, and duration in many parts of the world, with potential negative impacts on plant growth and productivity. The plants have evolved complex physiological and biochemical mechanisms to respond and adjust to water-deficient environments. The physiological and biochemical mechanisms associated with water-stress tolerance and water-use ef…	Rejected	Review
ACS'+ 'gene expression'+ 'drought stress' + ' plants'+ 'PGPR'	Google scholar	Phomopsis Liquidambaris Contributes to the Decease of Ethylene Biosynthesis in Rice under Salt Stress via Inhibiting the Activity of 1- Aminocyclopropane-1-Carboxylate Deaminase	Siddikee et al., 2021	The endophytic fungus Phomopsis liquidambaris is characterized as a plant growth-promoting agent under salt stress, but its mechanism is unknown. Herein, 1-Aminocyclopropane-1-Carboxylate Deaminase (ACCD) from the strain was con	Rejected	Duplicate
ACS'+ 'gene expression'+ 'drought stress' + ' plants'+ 'PGPR'	Google scholar	Metabolomic Profiling of Drought-Tolerant and Susceptible Peanut (Arachis hypogaea L.) Genotypes in Response to Drought Stress	Gundaraniya et al., 2020	Peanut is frequently constrained by extreme environmental conditions such as drought. To reveal the involvement of metabolites, TAG 24 (drought-tolerant) and JL 24 (drought-sensitive) peanut genotypes were investigated under control and 20% PEG 6000-mediated water scarcity conditions at the seedling stage. Samples were analyzed by gas chromatography−mass spectrometry (GC−MS) to identify untargete…	Rejected	No PGPR
ACS'+ 'gene expression'+ 'drought stress' + ' plants'+ 'PGPR'	Google scholar	Improving Flavonoid Metabolism in Blackberry Leaves and Plant Fitness by Using the Bioeffector Pseudomonas fluorescens N 21.4 and Its Metabolic Elicitors: A Biotechnological Approach for a More Sustainable Crop	Martin-Rivilla et al., 2020	Beneficial rhizobacterium Pseudomonas fluorescens N 21.4 and its metabolic elicitors inoculated to cultivars of blackberry (Rubus spp. Var. Loch Ness) reinforced the plants’ immune system and improved their fitness by increasing photosynthesis, decreasing oxidative stress, and activating pathogenesis-related proteins. They also triggered the leaves’ flavonoid metabolism, enhancing the accumulatio…	Rejected	No ACS
ACS'+ 'gene expression'+ 'drought stress' + ' plants'+ 'PGPR'	Google scholar	Engineering bacterial ACC deaminase for improving plant productivity under stressful conditions	Saghafi et al., 2020		Rejected	Book chapter
ACS'+ 'gene expression'+ 'drought stress' + ' plants'+ 'PGPR'	Google scholar	Plant Growth Promoting Rhizobacteria (PGPR) Regulated Phyto and Microbial Beneficial Protein Interactions	Dhawi et al., 2020	PlantGrowthPromotingRhizobacteria(PGPR) influence plants’ physiological characteristics, metabolites, pathways and proteins via alteration of corresponding gene expression. In the current study, a total of 42 upregulated uncharacterized sorghum bicolor root proteins influenced by PGPR were subjected to different analyses: phylogenetic tree, protein functional network, sequences similarity network…	Rejected	No ACS
ACS'+ 'gene expression'+ 'drought stress' + ' plants'+ 'PGPR'	Google scholar	Chitosan Based Nanoformulation for Sustainable Agriculture with Special Reference to Abiotic Stress: A Review	Hidangmayum et al., 2022	Chitosan is a naturally occurring biological macromolecule and second most abundant polysaccharide next to cellulose, derived from deacetylation of chitin. Due to its biocompatibility, biodegradability, nontoxic and broad spectrum of antimi- crobial activity, it has become an important field of drug delivery system study. With the advancement in nanotechnology, chitosan based nanoformulations hav…	Rejected	Review
ACS'+ 'gene expression'+ 'drought stress' + ' plants'+ 'PGPR'	Google scholar	Regulation of Ethylene Biosynthesis Under Salt Stress in Red Pepper (Capsicum annuum L.) by 1-Aminocyclopropane-1- Carboxylic Acid (ACC) Deaminase-producing Halotolerant Bacteria	Siddikee et al., 2012	The present study was carried out to understand the mechanism of salt stress amelioration in red pepper plants by inoculation of 1-aminocyclopropane-1-carboxylic acid (ACC) deaminase-producing halotolerant bacteria. In general, ethylene production, ACC concentration, ACC synthase (ACS), and ACC oxidase (ACO) enzyme activi- ties increased with increasing levels of salt stress. Treatment with halot…	Rejected	Proteomic study
ACS'+ 'gene expression'+ 'drought stress' + ' plants'+ 'PGPR'	Google scholar	Organic Acids, Sugars, and L-Tryptophane in Exudates of Vegetables Growing on Stonewool and Their Effects on Activities of Rhizosphere Bacteria	Kamilova et al., 2006	The influence of stonewool substrate on the exudation of the major soluble carbon nutrients and of the auxin precursor tryptophane for Pseudomonas biocontrol agents was studied. To this end, the composition of the organic acids and sugars, as well that of tryptophane, of axenically collected exudates of seed, seedlings, and roots of tomato, cucumber, and sweet pepper was determined. The major res…	Rejected	No ACS
ACS'+ 'gene expression'+ 'drought stress' + ' plants'+ 'PGPR'	Google scholar	Bacterial Modulation of the Plant Ethylene Signaling Pathway Improves Tolerance to Salt Stress in Lettuce (Lactuca sativa L.)	Fortt et al., 2022	Salinity has extensive adverse effects on plant growth and the development of new agronomic strategies to improve crop salt tolerance is becoming necessary. Currently, the use of plant growth promoting rhizobacteria (PGPR) to mitigate abiotic stress in crops is of increasing interest. The most analyzed mechanism is based on ACC deaminase activity, an enzyme that decreases the ethylene synthesis, …	Rejected	No ACS
ACS'+ 'gene expression'+ 'drought stress' + ' plants'+ 'PGPR'	Google scholar	Helping plants to deal with heavy metal stress: the role of nanotechnology and plant growth promoting rhizobacteria in the process of phytoremediation	Gulzar et al., 2022	Heavy metals (HMs) are not destroyable or degradable and persist in the environment for a long duration. Thus, eliminating and counteracting the HMs pollution of the soil environment is an urgent task to develop a safe and sustainable environ- ment. Plants are in close contact with the soil and can play an important role in soil clean-up, and the process is known as phytoremediation. However, und…	Rejected	Review
ACS'+ 'gene expression'+ 'drought stress' + ' plants'+ 'PGPR'	Google scholar	Impact of Pseudomonas sp. SVB-B33 on Stress- and Cell Wall-Related Genes in Roots and Leaves of Hemp under Salinity	Berni et al., 2022	Abstract: Salinity is a type of abiotic stress that negatively affects plant growth and development. Textile hemp (Cannabis sativa L.) is an important multi-purpose crop that shows sensitivity to salt stress in a genotype- and developmental stage-dependent manner. The root and shoot biomasses decrease in the presence of NaCl during vegetative growth and several stress-responsive genes are activat…	Rejected	No ACS
ACS'+ 'gene expression'+ 'drought stress' + ' plants'+ 'PGPR'	Google scholar	Coactive role of zinc oxide nanoparticles and plant growth promoting rhizobacteria for mitigation of synchronized effects of heat and drought stress in wheat plants	Azmat et al., 2022	This study intended to investigate the potential of the plant growth-promoting rhizobacteria (PGPR) and green synthesized zinc oxide nanoparticles (ZnO-NPs) (fruit extract of Papaya) against heat and drought stress in wheat. The characterization of green-synthesized ZnO-NPs was done through UV–vis spectrophotometry, Fourier-transform infrared spectrometry, X-ray diffraction and scanning electron …	Rejected	No ACS
ACS'+ 'gene expression'+ 'drought stress' + ' plants'+ 'PGPR'	Google scholar	Tailoring plant-associated microbial inoculants in agriculture: a roadmap for successful application	Saad et al., 2020	Plants are now recognized as metaorganisms which are composed of a host plant associated with a multitude of microbes that provide the host plant with a variety of essential functions to adapt to the local environment. Recent research showed the remarkable importance and range of microbial partners for enhancing the growth and health of plants. However, plant–microbe holobionts are influenced by …	Rejected	Review
ACS'+ 'gene expression'+ 'drought stress' + ' plants'+ 'PGPR'	Google scholar	Metal/Metalloid-Based Nanomaterials for Plant Abiotic Stress Tolerance: An Overview of the Mechanisms	Sarraf et al., 2022	In agriculture, abiotic stress is one of the critical issues impacting the crop productivity and yield. Such stress factors lead to the generation of reactive oxygen species, membrane damage, and other plant metabolic activities. To neutralize the harmful effects of abiotic stress, several strategies have been employed that include the utilization of nanomaterials. Nanomaterials are now gaining a…	Rejected	Review
ACS'+ 'gene expression'+ 'drought stress' + ' plants'+ 'PGPR'	Google scholar	Silicon-mediated abiotic and biotic stress mitigation in plants: Underlying mechanisms and potential for stress resilient agriculture	Ranjan et al., 2021	Silicon (Si) is a beneficial macronutrient for plants. The Si supplementation to growth media mitigates abiotic and biotic stresses by regulating several physiological, biochemical and molecular mechanisms. The uptake of Si from the soil by root cells and subsequent transport are facilitated by Lsi1 (Low silicon1) belonging to nodulin 26-like major intrinsic protein (NIP) subfamily of aquaporin p…	Rejected	Review
ACS'+ 'gene expression'+ 'drought stress' + ' plants'+ 'PGPR'	Google scholar	Nano-Encapsulation of Plant Growth-Promoting Rhizobacteria and Their Metabolites Using Alginate-Silica Nanoparticles and Carbon Nanotube Improves UCB1 Pistachio Micropropagation	Pour et al., 2019	UCB-1 is the commercial rootstock of pistachio. Reproduction of this rootstock by tissue culture is limited by low levels of proliferation rate. Therefore, any compound that improves the proliferation rate and the quality of the shoots can be used in the process of commercial reproduction of this rootstock. Use of plant growth-promoting bacteria is one of the best ideas. Given the beneficial effe…	Rejected	No ACS
ACS'+ 'gene expression'+ 'drought stress' + ' plants'+ 'PGPR'	Google scholar	Research Progress on the use of Plant Allelopathy in Agriculture and the Physiological and Ecological Mechanisms of Allelopathy	Cheng et al., 2015	Allelopathy is a common biological phenomenon by which one organism produces biochemicals that influence the growth, survival, development, and reproduction of other organisms. These biochemicals are known as allelochemicals and have beneficial or detrimental effects on target organisms. Plant allelopathy is one of the modes of interaction between receptor and donor plants and may exert either po…	Rejected	Review
ACS'+ 'gene expression'+ 'drought stress' + ' plants'+ 'PGPR'	Google scholar	Plant Stress: Challenges and Management in the New Decade	Bakka et al., 2022		Rejected	Book
ACS'+ 'gene expression'+ 'drought stress' + ' plants'+ 'PGPR'	Google scholar	Insights into the Physiological and Biochemical Impacts of Salt Stress on Plant Growth and Development	Shahid et al., 2020	Climate change is causing soil salinization, resulting in crop losses throughout the world. The ability of plants to tolerate salt stress is determined by multiple biochemical and molecular pathways. Here we discuss physiological, biochemical, and cellular modulations in plants in response to salt stress. Knowledge of these modulations can assist in assessing salt tolerance potential and the mech…	Rejected	Review
ACS'+ 'gene expression'+ 'drought stress' + ' plants'+ 'PGPR'	Google scholar	Bioeffector Pseudomonas fluorescens ZX Elicits Biosynthesis and Accumulation of Functional Ingredients in Citrus Fruit Peel: A Promising Strategy for a More Sustainable Crop	Wang et al., 2021	Preharvest application of biocontrol agents is a promising strategy for promoting biosynthesis and accumulation of functional ingredients in fruit crops. In this study, we sought to evaluate the potential of Pseudomonas fluorescens ZX in stimulating the primary and secondary metabolism of citrus fruit peel. Pretreatment with P. fluorescens ZX was found to significantly affect the concentrations a…	Rejected	No abiotic stress
ACS'+ 'gene expression'+ 'drought stress' + ' plants'+ 'PGPR'	Google scholar	Coordinated bacterial and plant sulfur metabolism in Enterobacter sp. SA187–induced plant salt stress tolerance	Andrés-Barrao et al., 2021	Enterobacter sp. SA187 is a root endophytic bacterium that main- tains growth and yield of plants under abiotic stress conditions. In this work, we compared the metabolic wirings of Arabidopsis and SA187 in the free-living and endophytic interaction states. The interaction of SA187 with Arabidopsis induced massive changes in bacterial gene expression for chemotaxis, flagellar biosynthesis, quorum…	Rejected	No drought stress
ACS'+ 'gene expression'+ 'drought stress' + ' plants'+ 'PGPR'	Google scholar	Characterization of leaf transcriptome in grafted tomato seedlings inoculated with beneficial rhizobacteria Azospirillum brasiliensis and Paraburholderia graminis	Caradonia et al., 2022		Rejected	Preprint
ACS'+ 'gene expression'+ 'drought stress' + ' plants'+ 'PGPR'	Google scholar	Genetic, Epigenetic and Phenotypic Diversity of Four Bacillus velezensis Strains Used for Plant Protection or as Probiotics	Reva et al., 2019	Bacillus velezensis strains are applied as ecologically safe biopesticides, plant growth promoting rhizobacteria (PGPR), and in veterinary probiotics. They are abundant in various environments including soil, plants, marine habitats, the intestinal micro-flora, etc. The mechanisms underlying this adaptive plasticity and bioactivity are not well understood, nor is it clear why several strains outp…	Rejected	No ACS
ACS'+ 'gene expression'+ 'drought stress' + ' plants'+ 'PGPR'	Google scholar	Chromium Bioaccumulation and Its Impacts on Plants: An Overview	Sharma et al., 2020	Chromium (Cr) is an element naturally occurring in rocky soils and volcanic dust. It has been classified as a carcinogen agent according to the International Agency for Research on Cancer. Therefore, this metal needs an accurate understanding and thorough investigation in soil–plant systems. Due to its high solubility, Cr (VI) is regarded as a hazardous ion, which contaminates groundwater and can…	Rejected	Review
ACS'+ 'gene expression'+ 'drought stress' + ' plants'+ 'PGPR'	Google scholar	Spatio-temporal dynamics in global rice gene expression (Oryza sativa L.) in response to high ammonium stress	Sun et al., 2021	Ammonium (NH4 + ) is the predominant nitrogen (N) source in many natural and agricultural ecosystems, including flooded rice fields. While rice is known as an NH4 + -tolerant species, it nevertheless suffers NH4 + toxicity at elevated soil concentrations. NH4 + excess rapidly leads to the disturbance of various physiolog- ical processes that ultimately inhibit shoot and root growth. However, the …	Rejected	No PGPR
ACS'+ 'gene expression'+ 'drought stress' + ' plants'+ 'PGPR'	Google scholar	Alleviation of salinity stress in wheat by ACC deaminase-producing Bacillus aryabhattai EWR29 with multifarious plant growth-promoting attributes	Farahat et al., 2020	Salinity is one of the most crucial stressors that restrain crop productivity. Endophytes with 1-aminocyclopropane-1-carboxylic acid (ACC) deaminase activity possess the potential to ameliorate salt stress in plants by degrading the precursor molecule of ethylene, ACC, whose concentration is elevated in salt-stressed plants. The present investigation reports the efficiency of salt-tolerant endoph…	Rejected	No ACS
ACS'+ 'gene expression'+ 'drought stress' + ' plants'+ 'PGPR'	Google scholar	Plant Growth Promoting Rhizobacteria: A Critical Review	Saharan et al., 2011	Plant growth-promoting rhizobacteria (PGPR) are naturally occurring soil bacteria that aggressively colonize plant roots and benefit plants by providing growth promotion. Inoculation of crop plants with certain strains of PGPR at an early stage of development improves biomass production through direct effects on root and shoots growth. Inoculation of ornamentals, forest trees, vegetables, and agr…	Rejected	Review
ACS'+ 'gene expression'+ 'drought stress' + ' plants'+ 'PGPR'	Google scholar	Recent advances in polyphenol oxidase-mediated plant stress responses	Zhang et al., 2021	Plant polyphenol oxidases (PPOs) are ubiquitous copper metalloenzymes with a biochemistry that has been known for more than a century. By the 1990s, biologists began to recognize the importance of PPOs in plant response to the infestation of herbivores and pathogens; ideas concerning a defensive role for PPOs arose to address observed evidence, and several testable hypotheses were suggested. Two …	Rejected	Review
ACS'+ 'gene expression'+ 'drought stress' + ' plants'+ 'PGPR'	Google scholar	Plant growth-promoting rhizobacteria (PGPR) improve the growth and nutrient use efficiency in maize (Zea mays L.) under water deficit conditions	Pereira et al., 2020	Drought is one of the major abiotic stresses that affects crop yield worldwide. An eco-friendly tool that can broadly improve plants' tolerance to water stress is bioionocula comprising plant growth-promoting rhizobacteria (PGPR). In this study, the effect of two PGPR Cupriavidus necator 1C2 (B1) and Pseudomonas fluorescens S3X (B2), singly and/or co-inoculated at two inocula sizes (S1 - 3 _x0001…	Rejected	No ACS
ACS'+ 'gene expression'+ 'drought stress' + ' plants'+ 'PGPR'	Google scholar	Priming winter wheat seeds with the bacterial quorum sensing signal N-hexanoyl-L- homoserine lactone (C6-HSL) shows potential to improve plant growth and seed yield	Moshynets et al., 2018	Several model plants are known to respond to bacterial quorum sensing molecules with altered root growth and gene expression patterns and induced resistance to plant patho- gens. These compounds may represent novel elicitors that could be applied as seed primers to enhance cereal crop resistance to pathogens and abiotic stress and to improve yields. We investigated whether the acyl-homoserine lac…	Rejected	No ACS
ACS'+ 'gene expression'+ 'drought stress' + ' plants'+ 'PGPR'	Google scholar	Inoculation of Soil with Plant Growth Promoting Bacteria Producing 1 Aminocyclopropane-1-Carboxylate Deaminase or Expression of the Corresponding acdS Gene in Transgenic Plants Increases Salinity Tolerance in Camelina sativa	Heydarian et al., 2016	Camelina sativa (camelina) is an oilseed crop touted for use on marginal lands; however, it is no more tolerant of soil salinity than traditional crops, such as canola. Plant growth-promoting bacteria (PGPB) that produce 1-aminocyclopropane-1-carboxylate deaminase (ACC deaminase) facilitate plant growth in the presence of abiotic stresses by reducing stress ethylene. Rhizospheric and endophytic P…	Rejected	No ACS
ACS'+ 'gene expression'+ 'drought stress' + ' plants'+ 'PGPR'	Google scholar	Understanding the role of miRNAs for improvement of tea quality and stress tolerance	Krishnatreya et al., 2021	MicroRNAs (miRNAs) are an emerging class of small non-coding RNAs that exhibit important role in regulation of gene expression, mostly through the mechanism of cleavage and/or inhibition of translation of target mRNAs during or after transcription. Although much has been unravelled about the role of miRNAs in diverse biological processes like maintenance of functional integrity of genes and genom…	Rejected	No ACS
ACS'+ 'gene expression'+ 'drought stress' + ' plants'+ 'PGPR'	Google scholar	Plant–Agrobacterium interaction mediated by ethylene and super-Agrobacterium conferring efficient gene transfer	Nonaka et al., 2014	grobacterium tumefaciens has a unique ability to transfer genes into plant genomes. This ability has been utilized for plant genetic engineering. However, the efficiency is not sufficient for all plant species. Several studies have shown that ethylene decreased the Agrobacterium-mediated transformation frequency. Thus, A. tumefaciens with an ability to suppress ethylene evolution would increase t…	Rejected	Review
ACS'+ 'gene expression'+ 'drought stress' + ' plants'+ 'PGPR'	Google scholar	The Chemistry of Plant–Microbe Interactions in the Rhizosphere and the Potential for Metabolomics to Reveal Signaling Related to Defense Priming and Induced Systemic Resistance	Mhlongo et al., 2018	Plant roots communicate with microbes in a sophisticated manner through chemical communication within the rhizosphere, thereby leading to biofilm formation of beneficial microbes and, in the case of plant growth-promoting rhizomicrobes/-bacteria (PGPR), resulting in priming of defense, or induced resistance in the plant host. The knowledge of plant–plant and plant–microbe interactions have been g…	Rejected	Review
ACS'+ 'gene expression'+ 'drought stress' + ' plants'+ 'PGPR'	Google scholar	Microbial modulation of plant ethylene signaling: ecological and evolutionary consequences	Ravanbakhsh et al., 2018	The plant hormone ethylene is one of the central regulators of plant development and stress resistance. Optimal ethylene signaling is essential for plant fitness and is under strong selection pressure. Plants upregulate ethylene production in response to stress, and this hormone triggers defense mechanisms. Due to the pleiotropic effects of ethylene, adjusting stress responses to maximize resista…	Rejected	Review
ACS'+ 'gene expression'+ 'drought stress' + ' plants'+ 'PGPR'	Google scholar	The Endophyte Pantoea alhagi NX-11 Alleviates Salt Stress Damage to Rice Seedlings by Secreting Exopolysaccharides	Sun et al., 2020	Endophytes have the potential to enhance the ability of plants to resist salt stress, improving crop development and yield. Therefore, in this study, we isolated an endophyte that produced large amounts of exopolysaccharides (EPSs) from the roots of sea rice and examined its effects on the physiological responses of rice (Oryza sativa L. ssp. japonica “Nipponbare”) seedlings to salt stress using …	Rejected	No ACS
ACS'+ 'gene expression'+ 'drought stress' + ' plants'+ 'PGPR'	Google scholar	ACC deaminase-containing Arthrobacter protophormiae induces NaCl stress tolerance through reduced ACC oxidase activity and ethylene production resulting in improved nodulation and mycorrhization in Pisum sativum	Barnawal et al., 2014	Induction of stress ethylene production in the plant system is one of the consequences of salt stress which apart from being toxic to the plant also inhibits mycorrhizal colonization and rhizobial nodulation by oxidative damage. Tolerance to salinity in pea plants was assessed by reducing stress ethylene levels through ACC deaminase-containing rhizobacteria Arthrobacter protophormiae (SA3) and pr…	Rejected	Proteomic study
ACS'+ 'gene expression'+ 'drought stress' + ' plants'+ 'PGPR'	Google scholar	Role of plant growth promoting Bacteria (PGPRs) as biocontrol agents of Meloidogyne incognita through improved plant defense of Lycopersicon esculentum	Khanna et al., 2019	Background and aims Root-knot nematodes are ma- jor constraints among different pathogens with wide host range and cause severe agricultural loss world- wide. The present study was designed to understand the role of plant growth promoting bacteria (Pseu- domonas aeruginosa & Burkholderia gladioli) on growth and antioxidative potential in nematode infected Lycopersicon esculentum seedlings. Method…	Rejected	Biotic stress
ACS'+ 'gene expression'+ 'drought stress' + ' plants'+ 'PGPR'	Google scholar	Heavy metal and metalloid toxicity in horticultural plants: Tolerance mechanism and remediation strategies	Noor et al., 2022	Heavy metal/metalloids (HMs) are among the primary soil pollutants that limit crop production worldwide. Plants grown in HM contaminated soils exhibit reduced growth and development, resulting in a decrease in crop production. The exposure to HMs induces plant oxidative stress due to the formation of free radicals, which alter plant morphophysiological and biochemical mechanisms at cellular and t…	Rejected	Review
ACS'+ 'gene expression'+ 'drought stress' + ' plants'+ 'PGPR'	Google scholar	Unsnarling Plausible Role of Plant Growth‐Promoting Rhizobacteria for Mitigating Cd‐Toxicity from Plants: An Environmental Safety Aspect	Khanna et al., 2021	Cadmium (Cd) is predominantly observed within the soil to cause deterioration of plant and microbial activities within rhizosphere. Cd-toxicity leads to major agricultural constraints due to its accumulation within plants and therefore entry within food chain. Plants face numerous repercussions like stunted growth, chlorosis, necrosis, inhibition of photosynthetic machinery and other physiologica…	Rejected	Review
ACS'+ 'gene expression'+ 'drought stress' + ' plants'+ 'PGPR'	Google scholar	Improvement of Plant Responses by Nanobiofertilizer: A Step towards Sustainable Agriculture	Akhtar et al., 2022	Drastic changes in the climate and ecosystem due to natural or anthropogenic activities have severely affected crop production globally. This concern has raised the need to develop environmentally friendly and cost-effective strategies, particularly for keeping pace with the demands of the growing population. The use of nanobiofertilizers in agriculture opens a new chapter in the sustainable prod…	Rejected	Review
ACS'+ 'gene expression'+ 'drought stress' + ' plants'+ 'PGPR'	Google scholar	Toxicity of copper hydroxide nanoparticles, bulk copper hydroxide, and ionic copper to alfalfa plants: A spectroscopic and gene expression study	Cota-Ruiz et al., 2018	Bulk Cu compounds such as Cu(OH)2 are extensively used as pesticides in agriculture. Recent investigations suggest that Cu-based nanomaterials can replace bulk materials reducing the environmental impacts of Cu. In this study, stress responses of alfalfa (Medicago sativa L.) seedlings to Cu(OH)2 nano- particle or compounds were evaluated. Seeds were immersed in suspension/solutions of a Cu(OH)2 n…	Rejected	No PGPR
ACS'+ 'gene expression'+ 'drought stress' + ' plants'+ 'PGPR'	Google scholar	Comparative Proteomics Analysis of the Rice Roots Colonized by Herbaspirillum seropedicae Strain SmR1 Reveals Induction of the Methionine Recycling in the Plant Host	Alberton et al., 2013	Although the use of plant growth-promoting bacteria in agriculture is a reality, the molecular basis of plant−bacterial interaction is still poorly understood. We used a proteomic approach to study the mechanisms of interaction of Herbaspirillum seropedicae SmR1 with rice. Root proteins of rice seedlings inoculated or noninoculated with H. seropedicae were separated by 2-D electrophoresis. Differ…	Accepted
ACS'+ 'gene expression'+ 'drought stress' + ' plants'+ 'PGPR'	Google scholar	Ambiguities of PGPR-Induced Plant Signaling and Stress Management	Jalmi et al., 2022	The growth and stress responses developed by the plant in virtue of the action of PGPR are dictated by the changes in hormone levels and related signaling pathways. Each plant possesses its specific type of microbiota that is shaped by the composition of root exudates and the signal molecules produced by the plant and microbes. Plants convey signals through diverse and complex signaling pathways.…	Rejected	Review
ACS'+ 'gene expression'+ 'drought stress' + ' plants'+ 'PGPR'	Google scholar	Microbial enzyme, 1-aminocyclopropane-1-carboxylic acid (ACC) deaminase: An elixir for plant under stress	Jha et al., 2021	Ethylene, being deleterious to plant in some instances like stress, is essential for ripening of fruits, overcoming seed dormancy and initiation of germination, however, ethylene can inhibit root elongation post germination. For plants, 1-aminocyclopropane-1-carboxylic acid (ACC) serves as precursor of ethylene however, for microbes ACC acts as chemoattractant. This establishes a scenario in the …	Rejected	Review
ACS'+ 'gene expression'+ 'drought stress' + ' plants'+ 'PGPR'	Google scholar	Effect of Cow Urine-Based Bioformulations on Growth and Physiological Responses in Mungbean Under Soil Moisture Stress Conditions	Rane et al., 2020	Experiments were conducted to evaluate the influence of cow urine-based bioformulations on the morphological, physiological growth response and expression of stress responsive genes under drought stress in mung- bean [Vigna radiata (L.) Wilczek] plants. An initial in vitro evaluation and three separate pot experiments were carried out by treating mungbean with varying concentrations of bioformula…	Rejected	No PGPR
ACS'+ 'gene expression'+ 'drought stress' + ' plants'+ 'PGPR'	Google scholar	Molecular Mechanisms of the 1-Aminocyclopropane-1-Carboxylic Acid (ACC) Deaminase Producing Trichoderma asperellum MAP1 in Enhancing Wheat Tolerance to Waterlogging Stress	Rauf et al., 2021	Waterlogging stress (WS) induces ethylene (ET) and polyamine (spermine, putrescine, and spermidine) production in plants, but their reprogramming is a decisive element for determining the fate of the plant upon waterlogging-induced stress. WS can be challenged by exploring symbiotic microbes that improve the plant’s ability to grow better and resist WS. The present study deals with identification…	Rejected	Fungi
ACS'+ 'gene expression'+ 'drought stress' + ' plants'+ 'PGPR'	Google scholar	Jasmonates and Plant Salt Stress: Molecular Players, Physiological Effects, and Improving Tolerance by Using Genome-Associated Tools	Delgado et al., 2021	Soil salinity is one of the most limiting stresses for crop productivity and quality worldwide. In this sense, jasmonates (JAs) have emerged as phytohormones that play essential roles in mediating plant response to abiotic stresses, including salt stress. Here, we reviewed the mechanisms underlying the activation and response of the JA-biosynthesis and JA-signaling pathways under saline condition…	Rejected	Review
ACS'+ 'gene expression'+ 'drought stress' + ' plants'+ 'PGPR'	Google scholar	Genetic factors involved in rhizosphere colonization by phytobeneficial Pseudomonas spp.	Zboralski et al., 2020	Plant growth-promoting rhizobacteria (PGPR) actively colonize the soil portion under the influence of plant roots, called the rhizosphere. Many plant-beneficial Pseudomonas spp. have been characterized as PGPR. They are ubiquitous rod-shaped motile Gram-negative bacteria displaying a high metabolic versa- tility. Their capacity to protect plants from pathogens and improve plant growth closely dep…	Rejected	Review
ACS'+ 'gene expression'+ 'drought stress' + ' plants'+ 'PGPR'	Google scholar	S‐Nitrosylation Analysis in Brassica juncea Apoplast Highlights the Importance of Nitric Oxide in Cold-Stress Signaling	Sehrawat et al., 2014	Reactive nitrogen species (RNS) including nitric oxide (NO) are important components of stress signaling. However, RNS-mediated signaling in the apoplast remains largely unknown. NO production measured in the shoot apoplast of Brassica juncea seedlings showed non- enzymatic nitrite reduction to NO. Thiol pool quantification showed cold-induced increase in the protein (including S-nitrosothiols) a…	Rejected	No PGPR
ACS'+ 'gene expression'+ 'drought stress' + ' plants'+ 'PGPR'	Google scholar	Deciphering the Symbiotic Plant Microbiome: Translating the Most Recent Discoveries on Rhizobia for the Improvement of Agricultural Practices in Metal-Contaminated and High Saline Lands	Bellabarba et al., 2019	Rhizosphere and plant-associated microorganisms have been intensely studied for their beneficial effects on plant growth and health. These mainly include nitrogen-fixing bacteria (NFB) and plant-growth promoting rhizobacteria (PGPR). This beneficial fraction is involved in major functions such as plant nutrition and plant resistance to biotic and abiotic stresses, which include water deficiency a…	Rejected	Review
ACS'+ 'gene expression'+ 'drought stress' + ' plants'+ 'PGPR'	Google scholar	Differential Physio-Biochemical and Metabolic Responses of Peanut (Arachis hypogaea L.) under Multiple Abiotic Stress Conditions	Patel et al., 2022	The frequency and severity of extreme climatic conditions such as drought, salinity, cold, and heat are increasing due to climate change. Moreover, in the field, plants are affected by multiple abiotic stresses simultaneously or sequentially. Thus, it is imperative to compare the effects of stress combinations on crop plants relative to individual stresses. This study investigated the differentia…	Rejected	No PGPR
ACS'+ 'gene expression'+ 'drought stress' + ' plants'+ 'PGPR'	Google scholar	Field Crop Responses and Management Strategies to Mitigate Soil Salinity in Modern Agriculture: A Review	Alkharabsheh et al., 2021	The productivity of cereal crops under salt stress limits sustainable food production and food security. Barley followed by sorghum better adapts to salinity stress, while wheat and maize are moderately adapted. However, rice is a salt-sensitive crop, and its growth and grain yield are significantly impacted by salinity stress. High soil salinity can reduce water uptake, create osmotic stress in …	Rejected	Review
ACS'+ 'gene expression'+ 'drought stress' + ' plants'+ 'PGPR'	Google scholar	Field Crops: Sustainable Management by PGPR	Seymen		Rejected	Book
ACS'+ 'gene expression'+ 'drought stress' + ' plants'+ 'PGPR'	Google scholar	Biotechnological uses of desiccation-tolerant microorganisms for the rhizoremediation of soils subjected to seasonal drought	Vilchez et al., 2011	Plant growth-promoting rhizobacteria (PGPR) increase the viability and health of host plants when they colonize roots and engage in associative symbiosis (Bashan et al. 2004). In return, PGPR viability is increased by host plant roots by the provision of nutrients and a more protective environment (Richardson et al. in Plant Soil 321:305–339, 2009). The PGPR have great potential in agriculture si…	Rejected	Review
ACS'+ 'gene expression'+ 'drought stress' + ' plants'+ 'PGPR'	Google scholar	Alleviative mechanisms of silicon solubilizing Bacillus amyloliquefaciens mediated diminution of arsenic toxicity in rice	Bist et al., 2022	Silicon (Si) has gained considerable attention for its utility in improved plant health under biotic and abiotic stresses through alteration of physiological and metabolic processes. Its interaction with arsenic (As) has been the compelling area of research amidst heavy metal toxicity. However, microbe mediated Si solubilization and their role for reduced As uptake is still an unexplored domain. …	Rejected	No ACS
ACS'+ 'gene expression'+ 'drought stress' + ' plants'+ 'PGPR'	Google scholar	Plant Growth-Promoting Activity of Herbaspirillum aquaticum ZXN111 on the Zijuan Tea Plant (Camellia sinensis var. assamica)	Wang et al., 2020	Herbaspirillum aquaticum ZXN111 which was isolated from the tea plant Zijuan can produce indole-3-acetic acid (IAA) and contain abiotic-stress tolerance gene 1-aminocyclopropane-1-carboxylate deaminase (accd). In this study, ZXN111 PGP activity and the molecular mechanism were investigated. The result showed that ACCD activity of wild-type ZXN111 was 0.4505 mM α-KB/mg·Pro·h, but mutants Δacc and …	Rejected	No ACS
ACS'+ 'gene expression'+ 'drought stress' + ' plants'+ 'PGPR'	Google scholar	Nanospecific Inhibition of Pyoverdine Siderophore Production in Pseudomonas chlororaphis O6 by CuO Nanoparticles	Dimkpa et al., 2012	CuO nanoparticles (NPs) exhibit dose-dependent toxicity to bacteria, whereas sublethal concentrations of these NPs change bacterial metabolism. Siderophores are model metabolites to study the impact of sublethal levels of metallic NPs on bacteria because they are involved in survival and interaction with other organisms and with metals. We report that a sublethal level of CuO NPs modify the produ…	Rejected	No PGPR
ACS'+ 'gene expression'+ 'drought stress' + ' plants'+ 'PGPR'	Google scholar	Stereoisomers of Nonvolatile Acetylbutanediol Metabolites Produced by Bacillus velezensis WRN031 Improved Root Elongation of Maize and Rice	Wang et al., 2020	Inoculation of crop plants with strains of beneficial bacteria can result in promotion of plant growth. In our study, we demonstrated that Bacillus velezensis WRN031 as a plant-growth-promoting rhizobacteria (PGPR) improved the maize seedling growth following inoculation with WRN031. Fluorescence microscopy visualization indicated that GFP-labeled B. velezensis WRN031 had accumulated on the matur…	Rejected	No ACS
ACS'+ 'gene expression'+ 'drought stress' + ' plants'+ 'PGPR'	Google scholar	Handbook for Azospirillum Technical Issues and Protocols	Castillo		Rejected	Book
ACS'+ 'gene expression'+ 'drought stress' + ' plants'+ 'PGPR'	Google scholar	Enterobacter asburiae Reduces Cadmium Toxicity in Maize Plants by Repressing Iron Uptake-Associated Pathways	Zhou et al., 2019	Soil microbes have recently been utilized to improve cadmium (Cd) tolerance and lower its accumulation in plants. Nevertheless, whether rhizobacteria can prevent Cd uptake by graminaceous plants and the underlying mechanisms remain elusive. In this study, inoculation with Enterobacter asburiae NC16 reduced transpiration rates and the expression of some iron (Fe) uptake-related genes including ZmF…	Rejected	No ACS
ACS'+ 'gene expression'+ 'drought stress' + ' plants'+ 'PGPR'	Google scholar	Bacteria in Agrobiology: Plant Nutrient Management	Cassa ́n		Rejected	Book
ACS'+ 'gene expression'+ 'drought stress' + ' plants'+ 'PGPR'	Google scholar	Partner-triggered proteome changes in the cell wall of Bacillus sonorensis and roots of groundnut benefit each other	Ankati et al., 2018	Plant growth promoting rhizobacteria (PGPR) promote plant growth and activate defense response against phytopathogens. At the subcellular level plant-PGPR interaction is less understood, which would be essential for future improvement(s) of PGPR formulations. In a rigorous screening process, that also involved efficient PGPR strains, Bacillus sonorensis RS4 was selected to study partner-triggered…	Rejected	No ACS
ACS'+ 'gene expression'+ 'drought stress' + ' plants'+ 'PGPR'	Google scholar	Formation and Comparative Analysis of Full-Length Transcriptome Sequencing and Next Generation Sequencing In Medicago Sativa L. Roots Under Abiotic Stress	Fang et al., 2021		Rejected	Preprint
ACS'+ 'gene expression'+ 'drought stress' + ' plants'+ 'PGPR'	Google scholar	Legume-based intercropping systems promote beneficial rhizobacterial community and crop yield under stressing conditions	Chamkh et al., 2022	Intercropping is an adapted farming system to optimize resource-use efficiency and crop yield, particularly in low input agricultural systems. Due to the beneficial eco-agricultural effects of grain legumes, their integration in mixed cropping systems such as intercropping systems can be more beneficial to soil fertility, soil functioning, and nutrient cycling. About 16–22% of the world’s food is…	Rejected	review
ACS'+ 'gene expression'+ 'drought stress' + ' plants'+ 'PGPR'	Google scholar	Bacillus velezensis: A Treasure House of Bioactive Compounds of Medicinal, Biocontrol and Environmental Importance	Alenezi et al., 2021	Bacillus velezensis gram-positive bacterium, is frequently isolated from diverse niches mainly soil, water, plant roots, and fermented foods. B. velezensis is ubiquitous, non-pathogenic and endospore forming. Being frequently isolated from diverse plant holobionts it is considered host adapted microorganism and recognized of high economic importance given its ability to promote plant growth under…	Rejected	review
ACS'+ 'gene expression'+ 'drought stress' + ' plants'+ 'PGPR'	Google scholar	Agricultural and Other Biotechnological Applications Resulting from Trophic Plant-Endophyte Interactions	Ku ́zniar et al., 2019	Endophytic microbiota plays a role not only in supplying plants with the basic nutrients indispensable for their growth, but also helps them in the mechanisms of adaptation to various environmental stresses (i.e., salinity, drought), which is important in the aspect of crop yields. From the agricultural and biotechnological points of view, the knowledge of endophytes and their roles in increasing…	Rejected	review
ACS'+ 'gene expression'+ 'drought stress' + ' plants'+ 'PGPR'	Google scholar	Nanomaterials. Effective tools for field and horticultural crops to cope with drought stress: A review	Maswada et al., 2020	Drought is the most serious environmental challenge that limits plant growth and causes more severe yield losses than other abiotic stress factors resulting in a serious food shortage. Nanomaterials (NMs) are considered as vital tools to overcome contemporary and future challenges in agricultural production. Recently, NMs have been applied for enhancing seed germination, growth, physiology, produ…	Rejected	review
ACS'+ 'gene expression'+ 'drought stress' + ' plants'+ 'PGPR'	Google scholar	Molecular Insights into the Role of Reactive Oxygen, Nitrogen and Sulphur Species in Conferring Salinity Stress Tolerance in Plants	Mangal et al., 2022	Salinity stress is the major abiotic stress that affects crop production and productivity as it has a multifarious negative effect on the growth and development of the plant. Salinity stress stimulates the accumulation of reactive oxygen species (ROS) which is toxic to cells at higher concentrations. At lower concentrations, these molecules help in the mitigation of salinity stress through a seri…	Rejected	No PGPR
ACS'+ 'gene expression'+ 'drought stress' + ' plants'+ 'PGPR'	Google scholar	Plant-Microbe Interactions in Agro-Ecological Perspectives	Sahu		Rejected	Book
ACS'+ 'gene expression'+ 'drought stress' + ' plants'+ 'PGPR'	Google scholar	Differential Protein Expression Analysis of Two Sugarcane Varieties in Response to Diazotrophic Plant Growth-Promoting Endophyte Enterobacter roggenkampii ED5	Guo et al., 2021	Plant endophytic bacteria have many vital roles in plant growth promotion (PGP), such as nitrogen (N) fixation and resistance to biotic and abiotic stresses. In this study, the seedlings of sugarcane varieties B8 (requires a low concentration of nitrogen for growth) and GT11 (requires a high concentration of nitrogen for growth) were inoculated with endophytic diazotroph Enterobacter roggenkampii…	Rejected	No ACS
ACS'+ 'gene expression'+ 'drought stress' + ' plants'+ 'PGPR'	Google scholar	Bacillus subtilis STU6 Ameliorates Iron Deficiency in Tomato by Enhancement of Polyamine-Mediated Iron Remobilization	Zhou et al., 2019	Iron (Fe) deficiency often triggers arginine overproduction in plants. However, it remains elusive whether Fe deficiency-induced increases of arginine levels are involved in beneficial rhizobacteria recruitment and that the mechanism underlying rhizobacteria induced plant Fe deficiency tolerance. Here, Bacillus subtilis STU6 increased soluble Fe content in tomato, thereby alleviating Fe deficienc…	Rejected	No ACS
ACS'+ 'gene expression'+ 'drought stress' + ' plants'+ 'PGPR'	Google scholar	Jasmonic Acid Signaling and Molecular Crosstalk with Other Phytohormones	Liu et al., 2021	Plants continually monitor their innate developmental status and external environment and make adjustments to balance growth, differentiation and stress responses using a complex and highly interconnected regulatory network composed of various signaling molecules and regulatory proteins. Phytohormones are an essential group of signaling molecules that work through a variety of different pathways …	Rejected	review
ACS'+ 'gene expression'+ 'drought stress' + ' plants'+ 'PGPR'	Google scholar	A review on metal-based nanoparticles and their toxicity to beneficial soil bacteria and fungi	Ameen et al., 2021	The unregulated deposition of metal-based nanoparticles in terrestrial ecosystems particularly in agricultural systems has alarmingly threatened the sustainability of the environment and diversity of beneficial microbial populations such as soil bacteria and fungi. This occurs due to the poor treatment of biosolids during wastewater treatment and their application in agricultural fields to enhanc…	Rejected	review
ACS'+ 'gene expression'+ 'drought stress' + ' plants'+ 'PGPR'	Google scholar	Impacts, Tolerance, Adaptation, and Mitigation of Heat Stress on Wheat under Changing Climates	Yadav et al., 2022	Heat stress (HS) is one of the major abiotic stresses affecting the production and quality of wheat. Rising temperatures are particularly threatening to wheat production. A detailed overview of morpho-physio-biochemical responses of wheat to HS is critical to identify various tolerance mechanisms and their use in identifying strategies to safeguard wheat production under changing climates. The de…	Rejected	review
ACS'+ 'gene expression'+ 'drought stress' + ' plants'+ 'PGPR'	Google scholar	Emerging Molecular Tools for Engineering Phytomicrobiome	Chaudhary et al 2021	Microbial plant interaction plays a major role in the sustainability of plants. The understanding of phytomicrobiome interactions enables the gene-editing tools for the construction of the microbial consortia. In this interaction, microbes share several common secondary metabolites and terpenoid metabolic pathways with their host plants that ensure a direct connection between the microbiome and a…	Rejected	review
ACS'+ 'gene expression'+ 'drought stress' + ' plants'+ 'PGPR'	Google scholar	Plant growth promoting rhizobacteria and endophytes accelerate phytoremediation of metalliferous soils	Ma et al., 2010	Technogenic activities (industrial—plastic, textiles, microelectronics, wood preservatives; mining—mine refuse, tailings, smelting; agrochemicals—chemical fertilizers, farm yard manure, pesticides; aerosols—pyrometallurgical and automobile exhausts; biosolids—sewage sludge, domestic waste; fly ash—coal combustion products) are the primary sources of heavy metal contamination and pollution in the …	Rejected	review
ACS'+ 'gene expression'+ 'drought stress' + ' plants'+ 'PGPR'	Google scholar	Tropical Peatland Eco-management	Osaki et al., 2021		Rejected	Book
ACS'+ 'gene expression'+ 'drought stress' + ' plants'+ 'PGPR'	Google scholar	Integrated Metabolomic and Proteomic Approaches Dissect the Effect of Metal-Resistant Bacteria on Maize Biomass and Copper Uptake	Li et al., 2013	Marginal soils arise due to various industrial and agricultural practices reducing crop productivity. Pseudomonas sp. TLC 6-6.5-4 is a free-living multiple-metal-resistant plant-growth-promoting bacteria (PGPB) isolated from Torch Lake sediment that promotes maize growth and nutrient uptake. In this study, we examined both PGPB−soil and PGPB−plant interactions. PGPB inoculation resulted in signif…	Rejected	No ACS
ACS'+ 'gene expression'+ 'drought stress' + ' plants'+ 'PGPR'	Google scholar	A Microbial-Based Biostimulant Enhances Sweet Pepper Performance by Metabolic Reprogramming of Phytohormone Profile and Secondary Metabolism	Bonini et al., 2020	Microbial-based biostimulants can improve crop productivity by modulating cell metabolic pathways including hormonal balance. However, little is known about the microbial-mediated molecular changes causing yield increase. The present study elucidates the metabolomic modulation occurring in pepper (Capsicum annuum L.) leaves at the vegetative and reproductive phenological stages, in response to mi…	Rejected	Fungi
ACS'+ 'gene expression'+ 'drought stress' + ' plants'+ 'PGPR'	Google scholar	Molecular Targets and Biological Functions of cAMP Signaling in Arabidopsis	Xu et al., 2021	Cyclic AMP (cAMP) is a pivotal signaling molecule existing in almost all living organisms. However, the mechanism of cAMP signaling in plants remains very poorly understood. Here, we employ the engineered activity of soluble adenylate cyclase to induce cellular cAMP elevation in Arabidopsis thaliana plants and identify 427 cAMP-responsive genes (CRGs) through RNA-seq analysis. Induction of cellul…	Rejected	No PGPR
ACS'+ 'gene expression'+ 'drought stress' + ' plants'+ 'PGPR'	Google scholar	VERSATILE ROLE OF AUXIN AND ITS CROSSTALK WITH OTHER PLANT HORMONES TO REGULATE PLANT GROWTH AND DEVELOPMENT	Ishtiaq et al., 2021	Plant growth regulators are significant chemical compounds which are synthesized inside the plant cells and play vital role in plant growth and development. Such compounds are usually active at very low concentrations. These plant growth regulators act as a signalling molecule, which influences the growth of plants. Throughout the previous year’s remarkable investigation have been done for unders…	Rejected	review
ACS'+ 'gene expression'+ 'drought stress' + ' plants'+ 'PGPR'	Google scholar	Growing more with less: Breeding and developing drought resilient soybean T to improve food security	Dubey et al., 2019		Rejected	Duplicate
ACS'+ 'gene expression'+ 'drought stress' + ' plants'+ 'PGPR'	Google scholar	Comparative Evaluation of Different Salt-Tolerant Plant Growth-Promoting Bacterial Isolates in Mitigating the Induced Adverse Effect of Salinity in Pisum sativum	Gupta et al., 2021		Rejected	Duplicate
ACS'+ 'gene expression'+ 'drought stress' + ' plants'+ 'PGPR'	Google scholar	Plant, Soil and Microbes in Tropical Ecosystems	Dubey et al., 2021		Rejected	Book
ACS'+ 'gene expression'+ 'drought stress' + ' plants'+ 'PGPR'	Google scholar	An Overview of the Genetics of Plant Response to Salt Stress: Present Status and the Way Forward	Kaleem et al., 2018	Salinity is one of the major threats faced by the modern agriculture today. It causes multidimensional effects on plants. These effects depend upon the plant growth stage, intensity, and duration of the stress. All these lead to stunted growth and reduced yield, ultimately inducing economic loss to the farming community in particular and to the country in general. The soil conditions of agricultu…	Rejected	review
ACS'+ 'gene expression'+ 'drought stress' + ' plants'+ 'PGPR'	Google scholar	Regulation of Plant Mineral Nutrition by Signal Molecules	Kalia et al., 2021		Rejected	Duplicate
ACS'+ 'gene expression'+ 'drought stress' + ' plants'+ 'PGPR'	Google scholar	Amelioration of Chromium-Induced Oxidative Stress by Combined Treatment of Selected Plant-Growth-Promoting Rhizobacteria and Earthworms via Modulating the Expression of Genes Related to Reactive Oxygen Species Metabolism in Brassica juncea	Sharma et al., 2022	Chromium (Cr) toxicity leads to the enhanced production of reactive oxygen species (ROS), which are extremely toxic to the plant and must be minimized to protect the plant from oxidative stress. The potential of plant-growth-promoting rhizobacteria (PGPR) and earthworms in plant growth and development has been extensively studied. The present study was aimed at investigating the effect of two PGP…	Rejected	No ACS
ACS'+ 'gene expression'+ 'drought stress' + ' plants'+ 'PGPR'	Google scholar	Delay of Postharvest Browning in Litchi Fruit by Melatonin via the Enhancing of Antioxidative Processes and Oxidation Repair	Zhang et al., 2018		Rejected	Duplicate
ACS'+ 'gene expression'+ 'drought stress' + ' plants'+ 'PGPR'	Google scholar	Advances in Plant Microbiome and Sustainable Agriculture	Yadav et al., 2020		Rejected	Book
ACS'+ 'gene expression'+ 'drought stress' + ' plants'+ 'PGPR'	Google scholar	Metabolomics: current application and prospects in crop production	Alawiye-Babalola, 2020	Necessary steps need to be taken in order to cushion the effects of hunger, famine, and drought in the world. To ameliorate these challenges, biotechnological innovations like meta-omics techniques have been employed in crop improvement programs. Metabolomics is a viable technology to fully detect the functional network of metabolites with far-reaching biological uses in agriculture, medicine, an…	Rejected	Review
ACS'+ 'gene expression'+ 'drought stress' + ' plants'+ 'PGPR'	Google scholar	Comparative Proteomics Analysis of the Rice Roots Colonized by Herbaspirillum seropedicae Strain SmR1 Reveals Induction of the Methionine Recycling in the Plant Host	Alberton et al., 2013		Rejected	Duplicate
ACS'+ 'gene expression'+ 'drought stress' + ' plants'+ 'PGPR'	Google scholar	Sustainable Development and Biodiversity	Yadav et al., 2021		Rejected	Book
ACS'+ 'gene expression'+ 'drought stress' + ' plants'+ 'PGPR'	Google scholar	Biotechnological approaches in agriculture and environmental management - bacterium Kocuria rhizophila 14ASP as heavy metal and salt- tolerant plant growth- promoting strain	Afridi et al.,2021	Plant growth-promoting bacteria (PGPB), possess multifarious beneficial traits and facilitate plant growth by both direct and indirect mechanisms under hostile conditions. The objective of the current study was to evaluate the potential application of 1- aminocyclopropane-1-carboxylate deaminase (ACC deaminase) producing plant-growth promoting endophyte bacterium (PGPEB) Kocuria rhizophila strain…	Rejected	No ACS
ACS'+ 'gene expression'+ 'drought stress' + ' plants'+ 'PGPR'	Google scholar	Improvement of Plant Responses by Nanobiofertilizer: A Step towards Sustainable Agriculture	Akhtar et al., 2022		Rejected	Duplicate
ACS'+ 'gene expression'+ 'drought stress' + ' plants'+ 'PGPR'	Google scholar	Beijerinckia fluminensis BFC-33, a novel multi-stress-tolerant soil bacterium: Deciphering the stress amelioration, phytopathogenic inhibition and growth promotion in Triticum aestivum (L.)	AL-Shwaiman et al., 2022	Environmental challenges like drought, salinity, heavy metals and pesticides directly/indirectly influence the environment and decreased the agricultural output. During its long developmental stages, cereal crops including wheat is exposed to a variety of abiotic/biotic stressors. Certain beneficial soil bacteria that can ameliorate environmental stresses can be exploited as crop growth promoters…	Rejected	No ACS
ACS'+ 'gene expression'+ 'drought stress' + ' plants'+ 'PGPR'	Google scholar	ACC deaminase-containing Arthrobacter protophormiae induces NaCl stress tolerance through reduced ACC oxidase activity and ethylene production resulting in improved nodulation and mycorrhization in Pisum sativum	Barnawal et al., 2014		Rejected	Duplicate
ACS'+ 'gene expression'+ 'drought stress' + ' plants'+ 'PGPR'	Google scholar	Impact of Pseudomonas sp. SVB-B33 on Stress- and Cell Wall-Related Genes in Roots and Leaves of Hemp under Salinity	Berni et al., 2022		Rejected	Duplicate
ACS'+ 'gene expression'+ 'drought stress' + ' plants'+ 'PGPR'	Google scholar	What Did We Learn From Plant Growth-Promoting Rhizobacteria (PGPR)-Grass Associations Studies Through Proteomic and Metabolomic Approaches?	Alberton et al., 2020	Plant growth stimulation by microorganisms that interact in a mutually beneficial manner remains poorly understood. Understanding the nature of plant-bacteria interactions may open new routes for plant productivity enhancement, especially cereal crops consumed by humans. Proteomic and metabolomic analyses are particularly useful for elucidating these mechanisms. A complete depiction of these mech…	Rejected	review
ACS'+ 'gene expression'+ 'drought stress' + ' plants'+ 'PGPR'	Google scholar	Delineation of mechanistic approaches employed by plant growth promoting microorganisms for improving drought stress tolerance in plants	Ali et al., 2021		Rejected	Duplicate
ACS'+ 'gene expression'+ 'drought stress' + ' plants'+ 'PGPR'	Google scholar	Wheat Production in Changing Environments Responses, Adaptation and Tolerance	Asif et al., 2019		Rejected	Book
ACS'+ 'gene expression'+ 'drought stress' + ' plants'+ 'PGPR'	Google scholar	Coactive role of zinc oxide nanoparticles and plant growth promoting rhizobacteria for mitigation of synchronized effects of heat and drought stress in wheat plants	Azmat et al., 2022		Rejected	Duplicate
ACS'+ 'gene expression'+ 'drought stress' + ' plants'+ 'PGPR'	Google scholar	Plant Stress: Challenges and Management in the New Decade	Bakka et al., 2022		Rejected	Book
ACS'+ 'gene expression'+ 'drought stress' + ' plants'+ 'PGPR'	Google scholar	Silica nanoparticles protect rice against biotic and abiotic stresses	Du et al., 2022	By 2050, the world population will increase to 10 billion which urged global demand for food produc- tion to double. Plant disease and land drought will make the situation more dire, and safer and environment-friendly materials are thus considered as a new countermeasure. The rice blast fungus, Magnaporthe oryzae, causes one of the most destructive diseases of cultivated rice worldwide that serio…	Rejected	Review
ACS'+ 'gene expression'+ 'drought stress' + ' plants'+ 'PGPR'	Google scholar	Vital roles of sustainable nano-fertilizers in improving plant quality and quantity-an updated review	El-Saadony et al., 2021	Nanotechnology has received much attention because of its distinctive properties and many applications in various fields. Nanotechnology is a new approach to increase agricultural production with premium quality, environmental safety, biological support, and financial stability. Ecofriendly technology is becom- ing progressively important in modern agricultural applications as alternatives to tra…	Rejected	review
ACS'+ 'gene expression'+ 'drought stress' + ' plants'+ 'PGPR'	Google scholar	Characterization of leaf transcriptome in grafted tomato seedlings inoculated with beneficial rhizobacteria Azospirillum brasiliensis and Paraburholderia graminis	Caradonia et al., 2022		Rejected	Duplicate
ACS'+ 'gene expression'+ 'drought stress' + ' plants'+ 'PGPR'	Google scholar	Research Progress on the use of Plant Allelopathy in Agriculture and the Physiological and Ecological Mechanisms of Allelopathy	Cheng et al., 2015		Rejected	Duplicate
ACS'+ 'gene expression'+ 'drought stress' + ' plants'+ 'PGPR'	Google scholar	Toxicity of copper hydroxide nanoparticles, bulk copper hydroxide, and ionic copper to alfalfa plants: A spectroscopic and gene expression study	Cota-Ruiz et al., 2018		Rejected	Duplicate
ACS'+ 'gene expression'+ 'drought stress' + ' plants'+ 'PGPR'	Google scholar	Plant Growth Promoting Rhizobacteria (PGPR) Regulated Phyto and Microbial Beneficial Protein Interactions	Dhawi et al., 2019		Rejected	Duplicate
ACS'+ 'gene expression'+ 'drought stress' + ' plants'+ 'PGPR'	Google scholar	Inoculation of Soil with Plant Growth Promoting Bacteria Producing 1-Aminocyclopropane-1-Carboxylate Deaminase or Expression of the Corresponding acdS Gene in Transgenic Plants Increases Salinity Tolerance in Camelina sativa	Heydarian et al., 2016		Rejected	Duplicate
ACS'+ 'gene expression'+ 'drought stress' + ' plants'+ 'PGPR'	Google scholar	Chitosan Based Nanoformulation for Sustainable Agriculture with Special Reference to Abiotic Stress: A Review	Hidangmayum et al., 2022		Rejected	Duplicate
ACS'+ 'gene expression'+ 'drought stress' + ' plants'+ 'PGPR'	Google scholar	Alleviation of salinity stress in wheat by ACC deaminase-producing Bacillus aryabhattai EWR29 with multifarious plant growth-promoting attributes	Farahat et al., 2020		Rejected	Duplicate
ACS'+ 'gene expression'+ 'drought stress' + ' plants'+ 'PGPR'	Google scholar	Bacterial Modulation of the Plant Ethylene Signaling Pathway Improves Tolerance to Salt Stress in Lettuce (Lactuca sativa L.)	Fortt et al. 2022		Rejected	Duplicate
ACS'+ 'gene expression'+ 'drought stress' + ' plants'+ 'PGPR'	Google scholar	Pure Organic Active Compounds Against Abiotic Stress: A Biostimulant Overview	García-García et al., 2020	Biostimulants (BSs) are probably one of the most promising alternatives nowadays to cope with yield losses caused by plant stress, which are intensified by climate change. Biostimulants comprise many different compounds with positive effects on plants, excluding pesticides and chemical fertilisers. Usually mixtures such as lixiviates from proteins or algal extracts have been used, but currently c…	Rejected	review
ACS'+ 'gene expression'+ 'drought stress' + ' plants'+ 'PGPR'	Google scholar	Helping plants to deal with heavy metal stress: the role of nanotechnology and plant growth promoting rhizobacteria in the process of phytoremediation	Gulzar et al., 2022		Rejected	Duplicate
ACS'+ 'gene expression'+ 'drought stress' + ' plants'+ 'PGPR'	Google scholar	Metabolomic Profiling of Drought-Tolerant and Susceptible Peanut (Arachis hypogaea L.) Genotypes in Response to Drought Stress	Gundaraniya et al., 2020		Rejected	Duplicate
ACS'+ 'gene expression'+ 'drought stress' + ' plants'+ 'PGPR'	Google scholar	Understanding the role of miRNAs for improvement of tea quality and stress tolerance	Krishnatreya et al., 2021		Rejected	Duplicate
ACS'+ 'gene expression'+ 'drought stress' + ' plants'+ 'PGPR'	Google scholar	Ambiguities of PGPR-Induced Plant Signaling and Stress Management	Jalmi et al., 2022		Rejected	Duplicate
ACS'+ 'gene expression'+ 'drought stress' + ' plants'+ 'PGPR'	Google scholar	Metabolome and transcriptome analyses of plants grown in naturally attenuated soil after hydrogen fluoride exposure	Jo et al., 2022	Accidental chemical leaks and illegal chemical discharges are a global environmental issue. In 2012, a hydrogen fluoride leak in Gumi, South Korea, killed several people and contaminated the environment. This leak also led to a significant decline in crop yield, even after the soil concentration of hydrogen fluoride decreased to below the standard level following natural attenuation. To determine…	Rejected	No ACS
ACS'+ 'gene expression'+ 'drought stress' + ' plants'+ 'PGPR'	Google scholar	Organic Acids, Sugars, and L-Tryptophane in Exudates of Vegetables Growing on Stonewool and Their Effects on Activities of Rhizosphere Bacteria	Kamilova et al., 2006		Rejected	Duplicate
ACS'+ 'gene expression'+ 'drought stress' + ' plants'+ 'PGPR'	Google scholar	Role of plant growth promoting Bacteria (PGPRs) as biocontrol agents of Meloidogyne incognita through improved plant defense of Lycopersicon esculentum	Khanna et al., 2019		Rejected	Duplicate
ACS'+ 'gene expression'+ 'drought stress' + ' plants'+ 'PGPR'	Google scholar	Priming winter wheat seeds with the bacterial quorum sensing signal N-hexanoyl-L- homoserine lactone (C6-HSL) shows potential to improve plant growth and seed yield	Moshynets et al., 2019		Rejected	Duplicate
ACS'+ 'gene expression'+ 'drought stress' + ' plants'+ 'PGPR'	Google scholar	Nanocarrier-Mediated Delivery of miRNA, RNAi, and CRISPR-Cas for Plant Protection: Current Trends and Future Directions	Mujtaba et al., 2021	Current trends in plant genetic transformation technologies, i.e., designing and applying molecules like miRNA, RNAi, and CRISPR-Cas, largely enable researchers to target specific sites in the plant genome to avert the growing biotic and abiotic threats to plants. However, the delivery of these molecules through conventional techniques brings an array of drawbacks such as low efficiency due to th…	Rejected	review
ACS'+ 'gene expression'+ 'drought stress' + ' plants'+ 'PGPR'	Google scholar	Drought Stress Responses in Soybean Roots and Nodules.	Kunert et al., 2016	Drought is considered to be a major threat to soybean production worldwide and yet our current understanding of the effects of drought on soybean productively is largely based on studies on above-ground traits. Although the roots and root nodules are important sensors of drought, the responses of these crucial organs and their drought tolerance features remain poorly characterized. The symbiotic …	Rejected	review
ACS'+ 'gene expression'+ 'drought stress' + ' plants'+ 'PGPR'	Google scholar	Foliar-applied cerium oxide nanomaterials improve maize yield under salinity stress: Reactive oxygen species homeostasis and rhizobacteria regulation	Liu et al., 2022	Salinity stress seriously threatens agricultural productivity and food security worldwide. This work reports on the mechanisms of alleviating salinity stress by cerium oxide nanomaterials (CeO2 NMs) in maize (Zea may L.). Soil- grown maize plants were irrigated with deionized water or 100 mM NaCl solution as the control or the salinity stress treatment. CeO2 NMs (1, 5, 10, 20, and 50 mg/L) with a…	Rejected	No ACS
ACS'+ 'gene expression'+ 'drought stress' + ' plants'+ 'PGPR'	Google scholar	Improving Flavonoid Metabolism in Blackberry Leaves and Plant Fitness by Using the Bioeffector Pseudomonas fluorescens N 21.4 and Its Metabolic Elicitors: A Biotechnological Approach for a More Sustainable Crop	Martin-Rivilla et al., 2020		Rejected	Duplicate
ACS'+ 'gene expression'+ 'drought stress' + ' plants'+ 'PGPR'	Google scholar	The Chemistry of Plant–Microbe Interactions in the Rhizosphere and the Potential for Metabolomics to Reveal Signaling Related to Defense Priming and Induced Systemic Resistance	Mhlongo et al., 2018		Rejected	Duplicate
ACS'+ 'gene expression'+ 'drought stress' + ' plants'+ 'PGPR'	Google scholar	The biological approaches of altering the growth and biochemical properties of medicinal plants under salinity stress	Miransari et al., 2021	Due to their interesting properties for human health, medicinal plants are of worldwide interest, including Iran. More has yet to be investigated and analyzed on the use of methods affecting medicinal plant growth and biochemical properties under stress. The important question about medicinal plants is the purpose of their plantation, determining their growth conditions. The present review articl…	Rejected	Review
ACS'+ 'gene expression'+ 'drought stress' + ' plants'+ 'PGPR'	Google scholar	Plant growth-promoting rhizobacteria (PGPR) improve the growth and nutrient use efficiency in maize (Zea mays L.) under water deficit conditions	Pereira et al., 2020		Rejected	Duplicate
ACS'+ 'gene expression'+ 'drought stress' + ' plants'+ 'PGPR'	Google scholar	1-Aminocyclopropane 1-Carboxylic Acid and Its Emerging Role as an Ethylene- Independent Growth Regulator	Polko et al., 2019	1-Aminocyclopropane 1-carboxylic acid (ACC) is the direct precursor of the plant hormone ethylene. ACC is synthesized from S-adenosyl-L-methionine (SAM) by ACC synthases (ACSs) and subsequently oxidized to ethylene by ACC oxidases (ACOs). Exogenous ACC application has been used as a proxy for ethylene in numerous studies as it is readily converted by nearly all plant tissues to ethylene. However,…	Rejected	Review
ACS'+ 'gene expression'+ 'drought stress' + ' plants'+ 'PGPR'	Google scholar	Plant–Agrobacterium interaction mediated by ethylene and super-Agrobacterium conferring efficient gene transfer	Nonaka et al., 2014		Rejected	Duplicate
ACS'+ 'gene expression'+ 'drought stress' + ' plants'+ 'PGPR'	Google scholar	Heavy metal and metalloid toxicity in horticultural plants: Tolerance mechanism and remediation strategies	Noor et al., 2022		Rejected	Duplicate
ACS'+ 'gene expression'+ 'drought stress' + ' plants'+ 'PGPR'	Google scholar	Role of Rhizospheric Bacillus megaterium HGS7 in Maintaining Mulberry Growth Under Extremely Abiotic Stress in Hydro-Fluctuation Belt of Three Gorges Reservoir.	Ou et al., 2022	Plant growth-promoting rhizobacteria have been shown to play important roles in maintaining host fitness under periods of abiotic stress, and yet their effect on mulberry trees which regularly suffer drought after flooding in the hydro-fluctuation belt of the Three Gorges Reservoir Region in China remains largely uncharacterized. In the present study, 74 bacterial isolates were obtained from the …	Rejected	No ACS
ACS'+ 'gene expression'+ 'drought stress' + ' plants'+ 'PGPR'	Google scholar	miRNA regulation and stress adaptation in plants	Pagano et al., 2021	Plant microRNAs (miRNAs) are small non-coding RNAs regulating of genes involved in major physiological processes including growth, development, and responses to biotic and abiotic stressors. Abiotic environmental stressors including drought, high or low temperature, salinity, and heavy metals may potentially cause extensive damage to plants, including to nuclear and organelle DNA. In this complex…	Rejected	No ACS
ACS'+ 'gene expression'+ 'drought stress' + ' plants'+ 'PGPR'	Google scholar	Plant Growth Promoting Rhizobacteria: A Critical Review	Saharan et al., 2011		Rejected	Duplicate
ACS'+ 'gene expression'+ 'drought stress' + ' plants'+ 'PGPR'	Google scholar	Quantitative mRNA Analysis of Induced Genes in Maize Inoculated with Acinetobacter baumannii Strain MZ30V92	Sandhya et al., 2019		Rejected	Duplicate
ACS'+ 'gene expression'+ 'drought stress' + ' plants'+ 'PGPR'	Google scholar	Silicon-mediated abiotic and biotic stress mitigation in plants: Underlying mechanisms and potential for stress resilient agriculture	Ranjan et al., 2021		Rejected	Duplicate
ACS'+ 'gene expression'+ 'drought stress' + ' plants'+ 'PGPR'	Google scholar	Microbial modulation of plant ethylene signaling: ecological and evolutionary consequences	Ravanbakhsh et al., 2018		Rejected	Duplicate
ACS'+ 'gene expression'+ 'drought stress' + ' plants'+ 'PGPR'	Google scholar	Genetic, Epigenetic and Phenotypic Diversity of Four Bacillus velezensis Strains Used for Plant Protection or as Probiotics	Reva et al., 2019		Rejected	Duplicate
ACS'+ 'gene expression'+ 'drought stress' + ' plants'+ 'PGPR'	Google scholar	Tailoring plant-associated microbial inoculants in agriculture: a roadmap for successful application	Saad et al., 2019		Rejected	Duplicate
ACS'+ 'gene expression'+ 'drought stress' + ' plants'+ 'PGPR'	Google scholar	Engineering bacterial ACC deaminase for improving plant productivity under stressful conditions	Saghafi et al., 2020		Rejected	Duplicate
ACS'+ 'gene expression'+ 'drought stress' + ' plants'+ 'PGPR'	Google scholar	AHL-priming functions via oxylipin and salicylic acid	Shenk et al., 2015	Collaborative action between the host plant and associated bacteria is crucial for the establishment of an efficient interaction. In bacteria, the synchronized behavior of a population is often achieved by a density-dependent communication called quorum sensing. This behavior is based on signaling molecules, which influence bacterial gene expression. N -acyl homoserine lactones (AHLs) are such mo…	Rejected	No PGPR
ACS'+ 'gene expression'+ 'drought stress' + ' plants'+ 'PGPR'	Google scholar	Regulation of Ethylene Biosynthesis Under Salt Stress in Red Pepper (Capsicum annuum L.) by 1-Aminocyclopropane-1- Carboxylic Acid (ACC) Deaminase-producing Halotolerant Bacteria	Siddikee et al.,2012		Rejected	Duplicate
ACS'+ 'gene expression'+ 'drought stress' + ' plants'+ 'PGPR'	Google scholar	Metal/Metalloid-Based Nanomaterials for Plant Abiotic Stress Tolerance: An Overview of the Mechanisms	Sarraf et al., 2022		Rejected	Duplicate
ACS'+ 'gene expression'+ 'drought stress' + ' plants'+ 'PGPR'	Google scholar	Insights into the Physiological and Biochemical Impacts of Salt Stress on Plant Growth and Development	Shahid et al., 2020		Rejected	Duplicate
ACS'+ 'gene expression'+ 'drought stress' + ' plants'+ 'PGPR'	Google scholar	Chromium Bioaccumulation and Its Impacts on Plants: An Overview	Sharma et al., 2020		Rejected	Duplicate
ACS'+ 'gene expression'+ 'drought stress' + ' plants'+ 'PGPR'	Google scholar	Sustainable Agriculture through Multidisciplinary Seed Nanopriming: Prospects of Opportunities and Challenges	Shelar et al., 2021		Rejected	Duplicate
ACS'+ 'gene expression'+ 'drought stress' + ' plants'+ 'PGPR'	Google scholar	Sustainable Agriculture through Multidisciplinary Seed Nanopriming: Prospects of Opportunities and Challenges	Shelar et al., 2021		Rejected	Duplicate
ACS'+ 'gene expression'+ 'drought stress' + ' plants'+ 'PGPR'	Google scholar	Bacteria in Agrobiology: Crop Productivity	Sumayo et al., 2013		Rejected	Book
ACS'+ 'gene expression'+ 'drought stress' + ' plants'+ 'PGPR'	Google scholar	Spatio-temporal dynamics in global rice gene expression (Oryza sativa L.) in response to high ammonium stress	Sun et al., 2017		Rejected	Duplicate
ACS'+ 'gene expression'+ 'drought stress' + ' plants'+ 'PGPR'	Google scholar	Application of CRISPR–Cas9 in plant–plant growth‐promoting rhizobacteria interactions for next Green Revolution	Singh et al., 2021	Agriculture's beginnings resulted in the domestication of numerous plant species as well as the use of natural resources. Food grain production took about 10,000 years to reach a billion tonnes in 1960, however, it took only 40 years to achieve 2 billion tonnes in year 2000. The creation of genetically modified crops, together with the use of enhanced agronomic practices, resulted in this remarka…	Rejected	review
ACS'+ 'gene expression'+ 'drought stress' + ' plants'+ 'PGPR'	Google scholar	Unraveling the secrets of rhizobacteria signaling in rhizosphere	Singh et al., 2022		Rejected	Duplicate
ACS'+ 'gene expression'+ 'drought stress' + ' plants'+ 'PGPR'	Google scholar	Expression of an exogenous 1-aminocyclopropane-1-carboxylate deaminase gene in psychrotolerant bacteria modulates ethylene metabolism and cold induced genes in tomato under chilling stress	Subramanian et al., 2015		Rejected	Duplicate
ACS'+ 'gene expression'+ 'drought stress' + ' plants'+ 'PGPR'	Google scholar	Ethylene as a modulator of disease resistance in plants	van Loon et al., 2016	The role of ethylene in the hormonal regulation of plant development has been well established. In addition, it has been implicated in biotic stress, both as a virulence factor of fungal and bacterial pathogens and as a signaling compound in disease resistance. This apparent discrepancy has stimulated research on the effects of various types of pathogens on mutant and transgenic plants that are i…	Rejected	review
ACS'+ 'gene expression'+ 'drought stress' + ' plants'+ 'PGPR'	Google scholar	Bioeffector Pseudomonas fluorescens ZX Elicits Biosynthesis and Accumulation of Functional Ingredients in Citrus Fruit Peel: A Promising Strategy for a More Sustainable Crop	Wang et al., 2021		Rejected	Duplicate
ACS'+ 'gene expression'+ 'drought stress' + ' plants'+ 'PGPR'	Google scholar	The Endophyte Pantoea alhagi NX-11 Alleviates Salt Stress Damage to Rice Seedlings by Secreting Exopolysaccharides	Sun et al., 2020		Rejected	Duplicate
ACS'+ 'gene expression'+ 'drought stress' + ' plants'+ 'PGPR'	Google scholar	Exploration of Epigenetics for Improvement of Drought and Other Stress Resistance in Crops: A Review	Sun et al., 2021	Crop plants often have challenges of biotic and abiotic stresses, and they adapt sophis- ticated ways to acclimate and cope with these through the expression of specific genes. Changes in chromatin, histone, and DNA mostly serve the purpose of combating challenges and ensuring the survival of plants in stressful environments. Epigenetic changes, due to environmental stress, enable plants to remem…	Rejected	review
ACS'+ 'gene expression'+ 'drought stress' + ' plants'+ 'PGPR'	Google scholar	Mycorrhizal Colonization Enhanced Sorghum bicolor Tolerance under Soil Water Deficit Conditions by Coordination of Proline and Reduced Glutathione (GSH)	Thangaraji et al., 2022	Drought stress is an important limiting factor in crop production. Arbuscular mycorrhizal fungi (AMF) enhance plant drought tolerance through antioxidant activities. However, the coordination of nonenzymatic antioxidants against drought remains unclear. Here, we investigated the AMF symbiosis in drought tolerance of Sorghum bicolor by increasing proline and reducing glutathione (GSH). Glomus moss…	Rejected	Fungi
ACS'+ 'gene expression'+ 'drought stress' + ' plants'+ 'PGPR'	Google scholar	The Good, the Bad, and the Ugly of Rhizosphere Microbiome	Ali et al., 2017		Rejected	Book chapter
ACS'+ 'gene expression'+ 'drought stress' + ' plants'+ 'PGPR'	Google scholar	Antioxidants in Plant-Microbe Interaction	Uarrota et al., 2021		Rejected	Book
ACS'+ 'gene expression'+ 'drought stress' + ' plants'+ 'PGPR'	Google scholar	OMICS approaches towards understanding plant’s responses to counterattack heavy metal stress: An insight into molecular mechanisms of plant defense	Yadav et al., 2021	Under constant climatic change and the existing environment, plants are exposed to several adverse factors such as extreme temperatures, high salt, heavy metals (HMs), drought, and pathogens. Prolonged exposure to such adverse conditions results in phytotoxicity and overall retardation of growth and development. Excess of HMs is one of the significant factors that affects plant growth significant…	Rejected	review
ACS'+ 'gene expression'+ 'drought stress' + ' plants'+ 'PGPR'	Google scholar	Bridging the Gaps between Plant and Human Health: A Systematic Review of Soyasaponins	Yates et al., 2021	Saponins, prominent secondary plant metabolites, are recognized for their roles in plant defense and medicinal benefits. Soyasaponins, commonly derived from legumes, are a class of triterpenoid saponins that demonstrate significant potential for plant and human health applications. Previous research and reviews largely emphasize human health effects of soyasaponins. However, the biological effect…	Rejected	Systematic Review
ACS'+ 'gene expression'+ 'drought stress' + ' plants'+ 'PGPR'	Google scholar	Soil bacteria augment Arabidopsis photosynthesis by decreasing glucose sensing and abscisic acid levels in planta	Zhang et al., 2008	Photosynthesis is regulated by environmental factors as well as endogenous sugar signals. Whereas light-driven sugar biosynthesis is essential for terrestrial organisms, as well as belowground microflora, whether and how soil symbionts regulate photosynthesis has yet to be reported. Here, we show that the plant growth-promoting soil bacterium Bacillus subtilis GB03 augments photosynthetic capacit…	Rejected	No abiotic stress
ACS'+ 'gene expression'+ 'drought stress' + ' plants'+ 'PGPR'	Google scholar	Recent advances in polyphenol oxidase-mediated plant stress responses	Zhang et al.,2021		Rejected	Duplicate
ACS'+ 'gene expression'+ 'drought stress' + ' plants'+ 'PGPR'	Google scholar	Climate Change and the Microbiome Sustenance of the Ecosphere	Choudhary et al., 2021		Rejected	Book
ACS'+ 'gene expression'+ 'drought stress' + ' plants'+ 'PGPR'	Google scholar	Rhizosphere Biology: Interactions Between Microbes and Plants	Gupta et al., 2021		Rejected	Book
ACS'+ 'gene expression'+ 'drought stress' + ' plants'+ 'PGPR'	Google scholar	Plant Growth Regulators Signalling Under Stress Conditions	Aftab et al., 2021		Rejected	Book
ACS'+ 'gene expression'+ 'drought stress' + ' plants'+ 'PGPR'	Google scholar	Bioformulation of biochar as a potential inoculant carrier for sustainable agriculture	Ajeng et al., 2020	The dependence on chemical fertilizers and pesticides to increase agricultural outputs owing to the demands of a growing human population creates the need for a sustainable fertilizer. Biochar is presently a promising candidate as an inoculant carrier, given its highly porous structure, with nutrients naturally derived from the biomass, high water, and nutrient retention properties, which favor m…	Rejected	review
ACS'+ 'gene expression'+ 'drought stress' + ' plants'+ 'PGPR'	Google scholar	Bacillus velezensis: A Treasure House of Bioactive Compounds of Medicinal, Biocontrol and Environmental Importance	Alenezi et al., 2021		Rejected	Duplicate
ACS'+ 'gene expression'+ 'drought stress' + ' plants'+ 'PGPR'	Google scholar	Field Crop Responses and Management Strategies to Mitigate Soil Salinity in Modern Agriculture: A Review	Alkharabsheh et al., 2021		Rejected	Duplicate
ACS'+ 'gene expression'+ 'drought stress' + ' plants'+ 'PGPR'	Google scholar	A review on metal-based nanoparticles and their toxicity to beneficial soil bacteria and fungi	Ameen et al., 2021		Rejected	Duplicate
ACS'+ 'gene expression'+ 'drought stress' + ' plants'+ 'PGPR'	Google scholar	Partner-triggered proteome changes in the cell wall of Bacillus sonorensis and roots of groundnut benefit each other	Ankati et al., 2018		Rejected	Duplicate
ACS'+ 'gene expression'+ 'drought stress' + ' plants'+ 'PGPR'	Google scholar	Environmental sustainability: challenges and viable solutions	Arora et al., 2018	Since last century or so anthropogenic activities have intensely metamorphosed the earth’s ecosystem and resulted into major environmental changes. Widespread interference of human related activities have resulted in major problems including environmental pollution, land degradation, global warming/climate change, paucity of potable water supply and biodiversity loss. These issues have directly a…	Rejected	review
ACS'+ 'gene expression'+ 'drought stress' + ' plants'+ 'PGPR'	Google scholar	Phosphate-Dependent Regulation of Growth and Stresses Management in Plants	Bechtaoui et al., 2021	The importance of phosphorus in the regulation of plant growth function is well studied. However, the role of the inorganic phosphate (Pi) molecule in the mitigation of abiotic stresses such as drought, salinity, heavy metal, heat, and acid stresses are poorly understood. We revisited peer-reviewed articles on plant growth characteristics that are phosphorus (P)-dependently regulated under the su…	Rejected	review
ACS'+ 'gene expression'+ 'drought stress' + ' plants'+ 'PGPR'	Google scholar	Deciphering the Symbiotic Plant Microbiome: Translating the Most Recent Discoveries on Rhizobia for the Improvement of Agricultural Practices in Metal-Contaminated and High Saline Lands	Bellabarba et al., 2019		Rejected	Duplicate
ACS'+ 'gene expression'+ 'drought stress' + ' plants'+ 'PGPR'	Google scholar	Alleviative mechanisms of silicon solubilizing Bacillus amyloliquefaciens mediated diminution of arsenic toxicity in rice	Bist et al., 2022		Rejected	Duplicate
ACS'+ 'gene expression'+ 'drought stress' + ' plants'+ 'PGPR'	Google scholar	Applications, challenges, and needs for employing synthetic biology beyond the lab	Brooks et al., 2021	Synthetic biology holds great promise for addressing global needs. However, most current developments are not immediately translatable to ‘outside-the-lab’ scenarios that differ from controlled laboratory settings. Challenges include enabling long-term storage stability as well as operating in resource-limited and off-the-grid scenarios using autonomous function. Here we analyze recent advances i…	Rejected	review
ACS'+ 'gene expression'+ 'drought stress' + ' plants'+ 'PGPR'	Google scholar	Legume-based intercropping systems promote beneficial rhizobacterial community and crop yield under stressing conditions	Chamkhi et al., 2022		Rejected	Duplicate
ACS'+ 'gene expression'+ 'drought stress' + ' plants'+ 'PGPR'	Google scholar	Plant Growth-Promoting Rhizobacteria (PGPR) as Biofertilizers and Biopesticides	Riaz et al., 2021		Rejected	Book chapter
ACS'+ 'gene expression'+ 'drought stress' + ' plants'+ 'PGPR'	Google scholar	Uptake, Transport, and Transformation of CeO2 Nanoparticles by Strawberry and Their Impact on the Rhizosphere Bacterial Community	Dai et al., 2019	Many studies demonstrated that CeO2 nanoparticles (NPs) could protect plant from stress and improve plant growth, with a great application potential in agriculture. However, our knowledge of their fate particularly in asexual plants and their effect on the rhizosphere microbiome is limited. In this study, the transport and transformation of CeO2 NPs in an asexual plantstrawberry (Fragaria × anan…	Rejected	No ACS
ACS'+ 'gene expression'+ 'drought stress' + ' plants'+ 'PGPR'	Google scholar	Seed Biofortification by Engineered Nanomaterials: A Pathway To Alleviate Malnutrition?	De La Torre-Roche et al., 2020	Micronutrient deficiencies in global food chains are a significant cause of ill health around the world, particularly in developing countries. Agriculture is the primary source of nutrients required for sound health, and as the population has continued to grow, the agricultural sector has come under pressure to improve crop production, in terms of both quantity and quality, to meet the global dem…	Rejected	review
ACS'+ 'gene expression'+ 'drought stress' + ' plants'+ 'PGPR'	Google scholar	Jasmonates and Plant Salt Stress: Molecular Players, Physiological Effects, and Improving Tolerance by Using Genome-Associated Tools	Delgado et al., 2021		Rejected	Duplicate
ACS'+ 'gene expression'+ 'drought stress' + ' plants'+ 'PGPR'	Google scholar	Nanospecific Inhibition of Pyoverdine Siderophore Production in Pseudomonas chlororaphis O6 by CuO Nanoparticles	Dimkpa et al., 2012		Rejected	Duplicate
ACS'+ 'gene expression'+ 'drought stress' + ' plants'+ 'PGPR'	Google scholar	Approaches for the amelioration of adverse effects of drought stress on crop plants	Dubey et al., 2021	Climate change, water scarcity, population growth, and food shortage are some of the threatening challenges being faced in today’s world. Among different types of stresses, drought stress presents a persistent challenge for global food production, however, its harshness and intensity are supposed to expand in the imminent future. The most striking effects of drought stress on plants are stunted g…	Rejected	Review
ACS'+ 'gene expression'+ 'drought stress' + ' plants'+ 'PGPR'	Google scholar	Formation and Comparative Analysis of Full-Length Transcriptome Sequencing and Next Generation Sequencing In Medicago Sativa L. Roots Under Abiotic Stress	Fang et al., 2021		Rejected	Duplicate
ACS'+ 'gene expression'+ 'drought stress' + ' plants'+ 'PGPR'	Google scholar	The Evolution of Ethylene Signaling in Plant Chemical Ecology	Groen et al., 2014	Ethylene is a key hormone in plant development, mediating plant responses to abiotic environmental stress, and interactions with attackers and mutualists. Here, we provide a synthesis of the role of ethylene in the context of plant ecology and evolution, and a prospectus for future research in this area. We focus on the regulatory function of ethylene in multi- organismal interactions. In general…	Rejected	Review
ACS'+ 'gene expression'+ 'drought stress' + ' plants'+ 'PGPR'	Google scholar	Differential Protein Expression Analysis of Two Sugarcane Varieties in Response to Diazotrophic Plant Growth-Promoting Endophyte Enterobacter roggenkampii ED5.	Guo et al., 2021		Rejected	Duplicate
ACS'+ 'gene expression'+ 'drought stress' + ' plants'+ 'PGPR'	Google scholar	Microbiota and Biofertilizers A Sustainable Continuum for Plant and Soil Health	Hakeem et al., 2021		Rejected	Book
ACS'+ 'gene expression'+ 'drought stress' + ' plants'+ 'PGPR'	Google scholar	Harsh Environment and Plant Resilience Molecular and Functional Aspects	Husen et al., 2021		Rejected	Book
ACS'+ 'gene expression'+ 'drought stress' + ' plants'+ 'PGPR'	Google scholar	Molecular insights into biochar‐mediated plant growth promotion and systemic resistance in tomato against fusarium crown and root rot disease	Jaiswal et al., 2020	Molecular mechanisms associated with biochar‐elicited suppression of soilborne plant diseases and improved plant performance are not well understood. A stem base inoculation approach was used to explore the ability of biochar to induce systemic resistance in tomato plants against crown rot caused by a soilborne pathogen, Fusarium oxysporum f. sp. radicis lycopersici. RnA‐seq transcriptome profili…	Rejected	Biotic stress
ACS'+ 'gene expression'+ 'drought stress' + ' plants'+ 'PGPR'	Google scholar	Microbial enzyme, 1-aminocyclopropane-1-carboxylic acid (ACC) deaminase: An elixir for plant under stress	Jha et al., 2021		Rejected	Duplicate
ACS'+ 'gene expression'+ 'drought stress' + ' plants'+ 'PGPR'	Google scholar	Enhancement of vitality and activity of a plant growth- promoting bacteria (pGpB) by atmospheric pressure non-thermal plasma	Ji et al., 2018	The inconsistent vitality and efficiency of plant growth promoting bacteria (PGPB) are technical limitations in the application of PGPB as biofertilizer. To improve these disadvantages, we examined the potential of micro Dielectric Barrier Discharge (DBD) plasma to enhance the vitality and functional activity of a PGPB, Bacillus subtilis CB-R05. Bacterial multiplication and motility were increase…	Rejected	Biotic stress
ACS'+ 'gene expression'+ 'drought stress' + ' plants'+ 'PGPR'	Google scholar	Effects of nanofertilizers on soil and plant-associated microbial communities: Emerging trends and perspectives	Kalwani et al., 2022	Modern agricultural practices are relying excessively upon the use of synthetic fertilizers to supply essential nutrients to promote crop productivity. Though useful in the short term, their prolonged and persistent applications are harmful to soil fertility and nutrient dynamics of the rhizospheric microbiome. The application of nanotechnology in form of nanofertilizer provides an innovative, ef…	Rejected	review
ACS'+ 'gene expression'+ 'drought stress' + ' plants'+ 'PGPR'	Google scholar	Agricultural and Other Biotechnological Applications Resulting from Trophic Plant-Endophyte Interactions	Ku ́zniar et al., 2019		Rejected	Duplicate
ACS'+ 'gene expression'+ 'drought stress' + ' plants'+ 'PGPR'	Google scholar	Bacteria in Agrobiology: Stress Management	Kumar		Rejected	Book
ACS'+ 'gene expression'+ 'drought stress' + ' plants'+ 'PGPR'	Google scholar	Proline Mechanisms of Stress Survival	Liang et al., 2013	The imino acid proline is utilized by different organisms to offset cellular imbalances caused by environmental stress. The wide use in nature of proline as a stress adaptor molecule indicates that proline has a fundamental biological role in stress response. Understanding the mechanisms by which proline enhances abiotic/biotic stress response will facilitate agricultural crop research and improv…	Rejected	Review
ACS'+ 'gene expression'+ 'drought stress' + ' plants'+ 'PGPR'	Google scholar	Jasmonic Acid Signaling and Molecular Crosstalk with Other Phytohormones	Liu et al., 2021		Rejected	Duplicate
ACS'+ 'gene expression'+ 'drought stress' + ' plants'+ 'PGPR'	Google scholar	Molecular Insights into the Role of Reactive Oxygen, Nitrogen and Sulphur Species in Conferring Salinity Stress Tolerance in Plants	Mangal et al., 2022		Rejected	Duplicate
ACS'+ 'gene expression'+ 'drought stress' + ' plants'+ 'PGPR'	Google scholar	Nanomaterials. Effective tools for field and horticultural crops to cope with drought stress: A review	Maswada et al., 2020		Rejected	Duplicate
ACS'+ 'gene expression'+ 'drought stress' + ' plants'+ 'PGPR'	Google scholar	Soybean abiotic stress tolerance is improved by beneficial rhizobacteria in biosolids-amended soil	McMillan et al., 2022	Soybean responds to heat and water deficit by producing ethylene, which in high concentrations reduces plant biomass. One way for soybean to tolerate stress is to associate with rhizobacteria that lower the ethylene con- centration by hydrolyzing the molecular precursor with the extracellular enzyme 1-aminocyclopropane-1- carboxylate deaminase (ACC deaminase). Organic fertilizer could enhance soy…	Rejected	Proteomic study
ACS'+ 'gene expression'+ 'drought stress' + ' plants'+ 'PGPR'	Google scholar	Decoding the mojo of plant-growth-promoting microbiomes	Mulani et al., 2021	Farmers, so-called the father of land, have a tremendous responsibility to feed the world. The demand for agricultural yield is constantly surging, and the resources that provide this agricultural yield is limited. This imbalance has forced farmers to treat their crops with chemicals to improve yield. These chemical substances are broadly classified as chemical fertilizers and chemical pesticides…	Rejected	Review
ACS'+ 'gene expression'+ 'drought stress' + ' plants'+ 'PGPR'	Google scholar	Microbial ACC-Deaminase: Prospects and Applications for Inducing Salt Tolerance in Plants	Nadeem et al., 2010	Salinity is one of the most important stresses that hamper agri- cultural productivity in nearly every part of the world. Enhanced biosynthesis of ethylene in plants under salinity stress is well es- tablished. Higher ethylene concentration inhibits root growth and ultimately affects the overall plant growth. Overcoming this ethylene-induced root inhibition is a prerequisite for successful crop p…	Rejected	Review
ACS'+ 'gene expression'+ 'drought stress' + ' plants'+ 'PGPR'	Google scholar	Plant growth promoting microbes: Potential link to sustainable agriculture and environment	Naik et al., 2019	The host-microbe interaction established through natural evolution in plants sets the basis of plant growth and productivity benefits from a single microbe or a consortium. Select algal, fungal, bacterial (particularly LABs), actinomycetes and yeast groups are potential effective microbes (EMs) in agriculture. As environmental pro- biotics, EMs help in crop growth and wellbeing by fixing N2, solu…	Rejected	review
ACS'+ 'gene expression'+ 'drought stress' + ' plants'+ 'PGPR'	Google scholar	Quorum sensing signaling molecules and their inhibitors in legume-associated bacteria	Nievas, 2021		Rejected	Book chapter
ACS'+ 'gene expression'+ 'drought stress' + ' plants'+ 'PGPR'	Google scholar	Root defense responses to fungal pathogens: A molecular perspective	Okubara et al., 2005	This review will focus on the molecular and genetic mechanisms underlying defense responses of roots to fungal pathogens. Soil-borne pathogens, including Phytophthora, Pythium, Fusarium, and Bipolaris, represent major sources of biotic stress in the rhizosphere and roots of plants. Molecular recognition and signaling leading to effective resistance has been demonstrated to occur between host and …	Rejected	review
ACS'+ 'gene expression'+ 'drought stress' + ' plants'+ 'PGPR'	Google scholar	Review: Phytostimulation and root architectural responses to quorum-sensing signals and related molecules from rhizobacteria	Ortiz-Castro et al., 2019	Bacteria rely on chemical communication to sense the environment and to retrieve information on their po- pulation densities. Accordingly, a vast repertoire of molecules is released, which synchronizes expression of genes, coordinates behavior through a process termed quorum-sensing (QS), and determines the relationships with eukaryotic species. Already identified QS molecules from Gram negative …	Rejected	review
ACS'+ 'gene expression'+ 'drought stress' + ' plants'+ 'PGPR'	Google scholar	When Salt Meddles Between Plant, Soil, and Microorganisms	Otlewska et al., 2020	In extreme environments, the relationships between species are often exclusive and based on complex mechanisms. This review aims to give an overview of the microbial ecology of saline soils, but in particular of what is known about the interaction between plants and their soil microbiome, and the mechanisms linked to higher resistance of some plants to harsh saline soil conditions. Agricultural s…	Rejected	review
ACS'+ 'gene expression'+ 'drought stress' + ' plants'+ 'PGPR'	Google scholar	Beneficial Rhizobacteria Induce Plant Growth: Mapping Signaling Networks in Arabidopsis	Paré et al., 2011		Rejected	Book chapter
ACS'+ 'gene expression'+ 'drought stress' + ' plants'+ 'PGPR'	Google scholar	Differential Physio-Biochemical and Metabolic Responses of Peanut (Arachis hypogaea L.) under Multiple Abiotic Stress Conditions	Patel et al., 2022		Rejected	Duplicate
ACS'+ 'gene expression'+ 'drought stress' + ' plants'+ 'PGPR'	Google scholar	Effect of Cow Urine-Based Bioformulations on Growth and Physiological Responses in Mungbean Under Soil Moisture Stress Conditions	Rane et al., 2020		Rejected	Duplicate
ACS'+ 'gene expression'+ 'drought stress' + ' plants'+ 'PGPR'	Google scholar	Molecular Mechanisms of the 1-Aminocyclopropane-1-Carboxylic Acid (ACC) Deaminase Producing Trichoderma asperellum MAP1 in Enhancing Wheat Tolerance to Waterlogging Stress	Rauf et al., 2021		Rejected	Duplicate
ACS'+ 'gene expression'+ 'drought stress' + ' plants'+ 'PGPR'	Google scholar	S‐Nitrosylation Analysis in Brassica juncea Apoplast Highlights the Importance of Nitric Oxide in Cold-Stress Signaling	Sehrawat et al., 2014		Rejected	Duplicate
ACS'+ 'gene expression'+ 'drought stress' + ' plants'+ 'PGPR'	Google scholar	Cadmium minimization in food crops by cadmium resistant plant growth promoting rhizobacteria	Sharma et al., 2016	Heavy metal contamination of agricultural soils leads to diverse environmental and ecological problems including microbial community shift, plant growth and yield reduction, deterioration of soil and entry of metal in the food chain. Cadmium (Cd) pollution has become a major agricultural concern and a common practice of phytoremediation is to develop plant systems that hyperaccumulate the metal i…	Rejected	Review
ACS'+ 'gene expression'+ 'drought stress' + ' plants'+ 'PGPR'	Google scholar	Modulation of insect-induced oxidative stress responses by microbial fertilizers in Brassica juncea	Sharma et al., 2020	Microbial fertilizers have increasingly gained popularity as environmentally sustainable nutritional supplement for plant growth. However, the effect of these microbes on plant-induced responses and the resultant effect on late-arriving herbivores are still unclear. Following insect herbivory, oxidative stress is one of the earliest responses induced in plants. Therefore, we analyzed the effect o…	Rejected	Insect
ACS'+ 'gene expression'+ 'drought stress' + ' plants'+ 'PGPR'	Google scholar	Rhizosphere, Rhizosphere Biology, and Rhizospheric Engineering	Sharma et al., 2021		Rejected	Book chapter
ACS'+ 'gene expression'+ 'drought stress' + ' plants'+ 'PGPR'	Google scholar	Precision Agriculture and Sustainable Crop Production	Singh et al., 2020		Rejected	Book
ACS'+ 'gene expression'+ 'drought stress' + ' plants'+ 'PGPR'	Google scholar	Phytohormonal signaling under abiotic stress	Souri et al., 2020		Rejected	Book chapter
ACS'+ 'gene expression'+ 'drought stress' + ' plants'+ 'PGPR'	Google scholar	Plant Growth-Promoting Actions of Rhizobacteria	SPAEPEN et al., 2009		Rejected	Book chapter
ACS'+ 'gene expression'+ 'drought stress' + ' plants'+ 'PGPR'	Google scholar	Biochemical Characterization of the Fusarium graminearum Candidate ACC-Deaminases and Virulence Testing of Knockout Mutant Strains	Svoboda et al.,2019	Fusarium graminearum is a plant pathogenic fungus which is able to infect wheat and other economically important cereal crop species. The role of ethylene in the interaction with host plants is unclear and controversial. We have analyzed the inventory of genes with a putative function in ethylene production or degradation of the ethylene precursor 1-aminocyclopropane carboxylic acid (ACC). F. gra…	Rejected	Fungi
ACS'+ 'gene expression'+ 'drought stress' + ' plants'+ 'PGPR'	Google scholar	Physiological responses of Burkholderia phytofirmans strain PsJN colonized plantlets of grapevine (Vitis vinifera L.) to low non-freezing temperatures	Theocharis, 2010		Rejected	Dissertation
ACS'+ 'gene expression'+ 'drought stress' + ' plants'+ 'PGPR'	Google scholar	Microbial Genomics in Sustainable Agroecosystems Volume 2	Tripathi et al., 2019.		Rejected	Book
ACS'+ 'gene expression'+ 'drought stress' + ' plants'+ 'PGPR'	Google scholar	Biotechnological uses of desiccation-tolerant microorganisms for the rhizoremediation of soils subjected to seasonal drought	Vilchez et al., 2011		Rejected	Duplicate
ACS'+ 'gene expression'+ 'drought stress' + ' plants'+ 'PGPR'	Google scholar	Silicon and plant growth promoting rhizobacteria differentially regulate AgNP-induced toxicity in Brassica juncea: Implication of nitric oxide	Vishwakarma et al., 2020	An emerging stress of nanomaterials in soil and water is of great concern as it limits crop productivity and affects humans as well. Therefore, it is required to manage this problem. Silicon and plant growth promoting rhizo- bacteria has gained the engaging role in agriculture as (bio-)fertilizers. However, their role against silver na- noparticles (AgNPs) is still not known. Hence, present study…	Rejected	No ACS
ACS'+ 'gene expression'+ 'drought stress' + ' plants'+ 'PGPR'	Google scholar	Proteomics and Metabolomics Studies on the Biotic Stress Responses of Rice: an Update	Vo et al., 2021	Biotic stresses represent a serious threat to rice production to meet global food demand and thus pose a major challenge for scientists, who need to understand the intricate defense mechanisms. Proteomics and metabolomics studies have found global changes in proteins and metabolites during defense responses of rice exposed to biotic stressors, and also reported the production of specific secondar…	Rejected	Review
ACS'+ 'gene expression'+ 'drought stress' + ' plants'+ 'PGPR'	Google scholar	Enhancement of drought stress tolerance in crops by plant growth promoting rhizobacteria	Vurukonda et al., 2016		Rejected	Duplicate
ACS'+ 'gene expression'+ 'drought stress' + ' plants'+ 'PGPR'	Google scholar	Stereoisomers of Nonvolatile Acetylbutanediol Metabolites Produced by Bacillus velezensis WRN031 Improved Root Elongation of Maize and Rice	Wang et al., 2020		Rejected	Duplicate
ACS'+ 'gene expression'+ 'drought stress' + ' plants'+ 'PGPR'	Google scholar	Nano-enabled improvements of growth and nutritional quality in food plants driven by rhizosphere processes	Wang et al., 2020	With the rising global population growth and limitation of traditional agricultural technology, global crop production could not provide enough nutrients to assure adequate intake for all people. Nano-fertilizers and nano-pesticides have 20–30% higher efficacy than conventional products, which offer an effective solution to the above-mentioned problem. Rhizosphere is where plant roots, soil, and …	Rejected	Review
ACS'+ 'gene expression'+ 'drought stress' + ' plants'+ 'PGPR'	Google scholar	Plant Growth-Promoting Activity of Herbaspirillum aquaticum ZXN111 on the Zijuan Tea Plant (Camellia sinensis var. assamica)	Wang et al., 2022		Rejected	Duplicate
ACS'+ 'gene expression'+ 'drought stress' + ' plants'+ 'PGPR'	Google scholar	Impacts, Tolerance, Adaptation, and Mitigation of Heat Stress on Wheat under Changing Climates	Yadav et al., 2022		Rejected	Duplicate
ACS'+ 'gene expression'+ 'drought stress' + ' plants'+ 'PGPR'	Google scholar	Nodule and Root Zone Microbiota of Salt-Tolerant Wild Soybean in Coastal Sand and Saline-Alkali Soil	Yang et al., 2020	Soil salinization limits crop growth and yield in agro-ecosystems worldwide by reducing soil health and altering the structure of microbial communities. Salt-tolerant plant growth- promoting rhizobacteria (PGPR) alleviate plant salinity stress. Wild soybean (Glycine soja Sieb. and Zucc.) is unique in agricultural ecosystems owing to its ability to grow in saline- alkali soils and fix atmospheric …	Rejected	No ACS
ACS'+ 'gene expression'+ 'drought stress' + ' plants'+ 'PGPR'	Google scholar	Foliar carbon dot amendment modulates carbohydrate metabolism, rhizospheric properties and drought tolerance in maize seedling	Yang et al., 2022	mproving maize drought tolerance is of great importance for scaling up production due to food security and pop- ulation growth. Carbon dots (CDs) were synthesized by hydrothermal method with citric acid and ethylenediamine as carbon sources. Then, CDs (5 ml, 5 mg‧L−1) were sprayed on 25th day-old maize (Zea mays L., drought-stress, 35% soil moisture) for seven consecutive days (spraying ultra-pur…	Rejected	No ACS
ACS'+ 'gene expression'+ 'drought stress' + ' plants'+ 'PGPR'	Google scholar	Genetic factors involved in rhizosphere colonization by phytobeneficial Pseudomonas spp.	Zboralski et al., 2020		Rejected	Duplicate
ACS'+ 'gene expression'+ 'drought stress' + ' plants'+ 'PGPR'	Google scholar	Insight into soil nitrogen and phosphorus availability and agricultural sustainability by plant growth‐promoting rhizobacteria	Zeng et al., 2022	Nitrogen and phosphorus are critical for the vegetation ecosystem and two of the most insufficient nutrients in the soil. In agriculture practice, many chemical fertilizers are being applied to soil to improve soil nutrients and yield. This farming pro- cedure poses considerable environmental risks which affect agricultural sustainability. As robust soil microorganisms, plant growth-promoting rhi…	Rejected	Review
ACS'+ 'gene expression'+ 'drought stress' + ' plants'+ 'PGPR'	Google scholar	Enterobacter asburiae Reduces Cadmium Toxicity in Maize Plants by Repressing Iron Uptake-Associated Pathways	Zhou et al., 2019		Rejected	Duplicate
ACS'+ 'gene expression'+ 'drought stress' + ' plants'+ 'PGPR'	Google scholar	Bacillus subtilis STU6 Ameliorates Iron Deficiency in Tomato by Enhancement of Polyamine-Mediated Iron Remobilization	Zhou et al., 2021		Rejected	Duplicate
ACS'+ 'gene expression'+ 'drought stress' + ' plants'+ 'PGPR'	Google scholar	Role of Silicon in Mediating Salt Tolerance in Plants: A Review	Zhu et al., 2019	Salt stress is a major threat for plant growth worldwide. The regulatory mechanisms of silicon in alleviating salt stress have been widely studied using physiological, molecular genetics, and genomic approaches. Recently, progresses have been made in elucidating the alleviative effects of silicon in salt-induced osmotic stress, Na toxicity, and oxidative stress. In this review, we highlight recen…	Rejected	Review
ACS'+ 'gene expression'+ 'drought stress' + ' plants'+ 'PGPR'	Google scholar	Plant Growth-Promoting Rhizospheric Microbes for Remediation of Saline Soils	Fatima et al., 2019		Rejected	Book chapter
ACS'+ 'gene expression'+ 'drought stress' + ' plants'+ 'PGPR'	Google scholar	Soil Science: Fundamentals to Recent Advances	Rakshit et al., 2021		Rejected	Book
ACS'+ 'gene expression'+ 'drought stress' + ' plants'+ 'PGPR'	Google scholar	Emerging Molecular Tools for Engineering Phytomicrobiome	Chaudhary et al., 2021		Rejected	Duplicate
ACS'+ 'gene expression'+ 'drought stress' + ' plants'+ 'PGPR'	Google scholar	Drought Tolerant Enterobacter sp./Leclercia adecarboxylata Secretes Indole-3-acetic Acid and Other Biomolecules and Enhances the Biological Attributes of Vigna radiata (L.) R. Wilczek in Water Deficit Conditions	Ahmed et al., 2021	Drought or water stress is a limiting factor that hampers the growth and yield of edible crops. Drought-tolerant plant growth-promoting rhizobacteria (PGPR) can mitigate water stress in crops by synthesizing multiple bioactive molecules. Here, strain PAB19 recovered from rhizospheric soil was biochemically and molecularly characterized, and identified as Enterobacter sp./Leclercia adecarboxylata …	Rejected	No ACS
ACS'+ 'gene expression'+ 'drought stress' + ' plants'+ 'PGPR'	Google scholar	Effects, tolerance mechanisms and management of salt stress in lucerne (Medicago sativa)	Al-Farsi et al., 2020	Lucerne (alfalfa, Medicago sativa L.) is a forage legume that is widely cultivated in arid and semi-arid regions of the world. The main aim of this review was to highlight the effects of salt stress on the performance of lucerne and to suggest different tolerance mechanisms and management strategies for improving its yield under salt stress. Salt stress significantly affects seed germination, car…	Rejected	review
ACS'+ 'gene expression'+ 'drought stress' + ' plants'+ 'PGPR'	Google scholar	Induction of Salt Tolerance by Enterobacter sp. SA187 in the Model Organism Arabidopsis thaliana	Alzubaidy, 2018		Rejected	Dissertation
ACS'+ 'gene expression'+ 'drought stress' + ' plants'+ 'PGPR'	Google scholar	“Omics” Insights into PAH Degradation toward Improved Green Remediation Biotechnologies	Amrani et al., 2015	This review summarizes recent knowledge of polycyclic aromatic hydrocarbons (PAHs) biotransformation by microorganisms and plants. Whereas most research has focused on PAH degradation either by plants or microorganisms separately, this review specifically addresses the interactions of plants with their rhizosphere microbial communities. Indeed, plant roots release exudates that contain various nu…	Rejected	review
ACS'+ 'gene expression'+ 'drought stress' + ' plants'+ 'PGPR'	Google scholar	A Microbial-Based Biostimulant Enhances Sweet Pepper Performance by Metabolic Reprogramming of Phytohormone Profile and Secondary Metabolism	Bonino et al., 2020		Rejected	Duplicate
ACS'+ 'gene expression'+ 'drought stress' + ' plants'+ 'PGPR'	Google scholar	PGPR-Induced Systemic Resistance (ISR) in Plant Disease Management	Annapurna,		Rejected	Book chapter
ACS'+ 'gene expression'+ 'drought stress' + ' plants'+ 'PGPR'	Google scholar	Seed Treatments with Microorganisms Can Have a Biostimulant Effect by Influencing Germination and Seedling Growth of Crops	Cardarelli et al., 2022	Seed quality is an important aspect of the modern cultivation strategies since uniform germination and high seedling vigor contribute to successful establishment and crop performance. To enhance germination, beneficial microbes belonging to arbuscular mycorrhizal fungi, Trichoderma spp., rhizobia and other bacteria can be applied to seeds before sowing via coating or priming treatments. Their pre…	Rejected	review
ACS'+ 'gene expression'+ 'drought stress' + ' plants'+ 'PGPR'	Google scholar	Handbook for Azospirillum Technical Issues and Protocols	Cassàn et al.2015		Rejected	Book
ACS'+ 'gene expression'+ 'drought stress' + ' plants'+ 'PGPR'	Google scholar	Endophytic microbial influence on plant stress responses	Chandran et al., 2020		Rejected	Book chapter
ACS'+ 'gene expression'+ 'drought stress' + ' plants'+ 'PGPR'	Google scholar	Techniques for improving formulations of bioinoculants	Chaudhary et al., 2020	Bioinoculants are eco-friendly microorganisms having a variety of products commonly utilized for improving the potential of soil and providing the nutrient requirements to the host plant. The usage of chemical fertilizers is not beneficial because it affects the soil microbial communities on large scale. The toxicity of chemical fertilizer decreases the fertility of soil and causes microbial disr…	Rejected	review
ACS'+ 'gene expression'+ 'drought stress' + ' plants'+ 'PGPR'	Google scholar	Plant Growth Promoting Rhizobacteria (PGPR) and Plutella xylostella (L.) (Lepidoptera: Plutellidae) interaction as a resistance inductor factor in Brassica oleracea var. capitata	Crialesi et al., 2017	Resistance of Plutella xylostella populations to chemical insecticides has made its management difficult, and the utilization of resistant cabbage cultivars has been shown to be a useful alternative. The objective of this study was to demonstrate the induction of cabbage plant resistance to P. xylostella using PGPR and injuries caused by the pest larvae as elicitors. Therefore, we evaluated the i…	Rejected	Insect
ACS'+ 'gene expression'+ 'drought stress' + ' plants'+ 'PGPR'	Google scholar	Proteomic Analysis of Eucalyptus Leaves Unveils Putative Mechanisms Involved in the Plant Response to a Real Condition of Soil Contamination by Multiple Heavy Metals in the Presence or Absence of Mycorrhizal/Rhizobacterial Additives	Guarino et al., 2014	Here we report on the growth, accumulation performances of, and leaf proteomic changes in Eucalyptus camaldulensis plants harvested for different periods of time in an industrial, heavy metals (HMs)-contaminated site in the presence or absence of soil microorganism (AMs/PGPRs) additives. Data were compared to those of control counterparts grown in a neighboring nonpolluted district. Plants harves…	Rejected	No ACS
ACS'+ 'gene expression'+ 'drought stress' + ' plants'+ 'PGPR'	Google scholar	Sustainable Agriculture Reviews	Hayat et al., 2020		Rejected	Book
ACS'+ 'gene expression'+ 'drought stress' + ' plants'+ 'PGPR'	Google scholar	Silicon as a Vegetable Crops Modulator—A Review	Kaushik et al., 2019	Vegetables require an optimum supply of mineral elements like silicon (Si). Si is second to oxygen in its abundance in the earth crust, and its role is quite significant in tackling biotic and abiotic stresses of vegetables. Si application also improves several agronomic and quality traits of vegetables. Hence, Si application is recommended as a strategy for the improvement of vegetable crops pro…	Rejected	review
ACS'+ 'gene expression'+ 'drought stress' + ' plants'+ 'PGPR'	Google scholar	Salt tolerance of Glycine max.L induced by endophytic fungus Aspergillus flavus CSH1, via regulating its endogenous hormones and antioxidative system	Lubna et al., 2018	Abiotic stress resistance strategies are powerful approaches to sustainable agriculture because they reduce chemical input and enhance plant productivity. In current study, an endophytic fungus, Aspergillus flavus CHS1 was isolated from Chenopodium album Roots. CHS1 was initially screened for growth promoting activities like siderphore, phosphate solubilization, and the production of indole aceti…	Rejected	Fungi
ACS'+ 'gene expression'+ 'drought stress' + ' plants'+ 'PGPR'	Google scholar	Plant Hormonomics: A Key Tool for Deep Physiological Phenotyping to Improve Crop Productivity	Hirayama et al., 2022	Agriculture is particularly vulnerable to climate change. To cope with the risks posed by climate-related stressors to agricultural production, global population growth, and changes in food preferences, it is imperative to develop new climate-smart crop varieties with increased yield and envi- ronmental resilience. Molecular genetics and genomic anal- yses have revealed that allelic variations in…	Rejected	review
ACS'+ 'gene expression'+ 'drought stress' + ' plants'+ 'PGPR'	Google scholar	Induction of Terpenoid Synthesis in Cotton Roots and Control of Rhizoctonia solani by Seed Treatment with Trichoderma virens	Howell et al., 1999	Research on the mechanisms employed by the biocontrol agent Trichoderma virens to suppress cotton (Gossypium hirsutum) seedling disease incited by Rhizoctonia solani has shown that mycoparasitism and antibiotic production are not major contributors to successful biological control. In this study, we examined the possibility that seed treatment with T. virens stimulates defense responses, as indic…	Rejected	Biotic stress
ACS'+ 'gene expression'+ 'drought stress' + ' plants'+ 'PGPR'	Google scholar	VERSATILE ROLE OF AUXIN AND ITS CROSSTALK WITH OTHER PLANT HORMONES TO REGULATE PLANT GROWTH AND DEVELOPMENT	Ishtiaq et al., 2021		Rejected	Duplicate
ACS'+ 'gene expression'+ 'drought stress' + ' plants'+ 'PGPR'	Google scholar	Nutritional Quality Improvement in Plants	Jaiwal et al., 2019		Rejected	Book
ACS'+ 'gene expression'+ 'drought stress' + ' plants'+ 'PGPR'	Google scholar	Chronicle of a Soil Bacterium: Paenibacillus polymyxa E681 as a Tiny Guardian of Plant and Human Health	Jeong et al., 2019	The Gram-positive rhizosphere bacterium Paenibacillus polymyxa promotes plant growth and produces various antibiotics. Herein, we review research on this species over the past two and a half decades, and focus on the mechanisms of P. polymyxa strain E681, isolated from barley roots in the South Korea in 1995. Strain E681 has outstanding growth-promoting effects on barley, cucumber, pepper, sesame…	Rejected	review
ACS'+ 'gene expression'+ 'drought stress' + ' plants'+ 'PGPR'	Google scholar	Silicon as a Vegetable Crops Modulator—A Review	Kaushik et al., 2019		Rejected	Duplicate
ACS'+ 'gene expression'+ 'drought stress' + ' plants'+ 'PGPR'	Google scholar	Omics Science for Rhizosphere Biology	Pudake et al., 2021		Rejected	Book
ACS'+ 'gene expression'+ 'drought stress' + ' plants'+ 'PGPR'	Google scholar	The Role of Plant Growth- Promoting Bacteria in Metal Phytoremediation	Kong et al., 2017		Rejected	Book chapter
ACS'+ 'gene expression'+ 'drought stress' + ' plants'+ 'PGPR'	Google scholar	Genome Sequencing of Rahnella victoriana JZ-GX1 Provides New Insights Into Molecular and Genetic Mechanisms of Plant Growth Promotion	Kong et al., 2022	Genomic information for bacteria within the genus Rahnella remains limited. Rahnella sp. JZ-GX1 was previously isolated from the Pinus massoniana rhizosphere in China and shows potential as a plant growth-promoting (PGP) bacterium. In the present work, we combined the GridION Nanopore ONT and Illumina sequencing platforms to obtain the complete genome sequence of strain JZ-GX1, and the applicatio…	Rejected	No abiotic stress
ACS'+ 'gene expression'+ 'drought stress' + ' plants'+ 'PGPR'	Google scholar	Omics-Based Mechanistic Insight Into the Role of Bioengineered Nanoparticles for Biotic Stress Amelioration by Modulating Plant Metabolic Pathways	Kumari et al., 2020	Bioengineered silver nanoparticles can emerge as a facile approach to combat plant pathogen, reducing the use of pesticides in an eco-friendly manner. The plants’ response during tripartite interaction of plant, pathogen, and nanoparticles remains largely unknown. This study demonstrated the use of bioengineered silver nanoparticles in combating black spot disease caused by necrotrophic fungus Al…	Rejected	Biotic stress
ACS'+ 'gene expression'+ 'drought stress' + ' plants'+ 'PGPR'	Google scholar	Integrated Metabolomic and Proteomic Approaches Dissect the Effect of Metal-Resistant Bacteria on Maize Biomass and Copper Uptake	Li et al., 2014		Rejected	Duplicate
ACS'+ 'gene expression'+ 'drought stress' + ' plants'+ 'PGPR'	Google scholar	Investigation of the Geographical Environment Impact on the Chemical Components of Peganum harmala L. through a Combined Analytical Method	Li et al., 2021	By implementing NMR, inductively coupled plasma-atomic emission spectrometry (ICP-AES), and the UV− vis spectroscopic techniques, metabolites, mineral elements, andantioxidant activities (DPPH) of Peganum harmala L. samples from Manasi and Fuhai of Xinjiang were studied in this research to investigate the geographical environment impact at the molecular level. First of all, partial least squares …	Rejected	No abiotic stress
ACS'+ 'gene expression'+ 'drought stress' + ' plants'+ 'PGPR'	Google scholar	The Plant Growth-Promoting Rhizobacterium Variovorax boronicumulans CGMCC 4969 Regulates the Level of Indole-3- Acetic Acid Synthesized from Indole-3-Acetonitrile	Sun et al., 2018	Variovorax is a metabolically diverse genus of plant growth-promoting rhizobacteria (PGPR) that engages in mutually beneficial interactions between plants and microbes. Unlike most PGPR, Variovorax cannot synthesize the phytohormone indole-3-acetic acid (IAA) via tryptophan. However, we found that Variovorax boroni- cumulans strain CGMCC 4969 can produce IAA using indole-3-acetonitrile (IAN) as t…	Rejected	No ACS
ACS'+ 'gene expression'+ 'drought stress' + ' plants'+ 'PGPR'	Google scholar	Real time expression of ACC oxidase and PR-protein genes mediated by Methylobacterium spp. in tomato plants challenged with Xanthomonas campestris pv. Vesicatoria	Yim et al., 2014	Biotic stress like pathogenic infection increases ethylene biosynthesis in plants and ethylene inhibitors are known to alleviate the severity of plant disease incidence. This study aimed to reduce the bacte- rial spot disease incidence in tomato plants caused by Xanthomonas campestris pv. vesicatoria (XCV) by modulating stress ethylene with 1-aminocyclopropane-1-carboxylate (ACC) deaminase activi…	Rejected	Biotic stress
ACS'+ 'gene expression'+ 'drought stress' + ' plants'+ 'PGPR'	Google scholar	Plant growth promoting rhizobacteria and endophytes accelerate phytoremediation of metalliferous soils	Ma et al., 2011		Rejected	Duplicate
ACS'+ 'gene expression'+ 'drought stress' + ' plants'+ 'PGPR'	Google scholar	Endophytic Bacterium Pseudomonas fluorescens RG11 May Transform Tryptophan to Melatonin and Promote Endogenous Melatonin Levels in the Roots of Four Grape Cultivars	Ma et al., 2017	Endophytes have been verified to synthesize melatonin in vitro and promote abiotic stress-induced production of endogenous melatonin in grape (Vitis vinifera L.) roots. This study aimed to further characterize the biotransformation of tryptophan to melatonin in the endophytic bacterium Pseudomonas fluorescens RG11 and to investigate its capacity for enhancing endogenous melatonin levels in the ro…	Rejected	No abiotic stress
ACS'+ 'gene expression'+ 'drought stress' + ' plants'+ 'PGPR'	Google scholar	Role of phytohormones as master regulators during the abiotic stress	Nahakpam et al., 2021		Rejected	Book chapter
ACS'+ 'gene expression'+ 'drought stress' + ' plants'+ 'PGPR'	Google scholar	Saccharomonospora actinobacterium alleviates phytotoxic hazards of tungsten nanoparticles on legumes’ growth and osmotic status	Selim et al., 2021	Like its bulk counterpart, tungsten (W) nanoparticles (WNPs) could induce environmental hazard to plant growth and yield, however no study investigated their phytotoxicity. On the other hand, plant growth-promoting bac- teria (PGPB) can be effectively applied to reduce WNPS toxicity. Therefore, we aimed at investigating the phytotoxic effect of WPNs upon some leguminous plants and how could PGPB …	Rejected	No abiotic stress
ACS'+ 'gene expression'+ 'drought stress' + ' plants'+ 'PGPR'	Google scholar	Advances in PGPR Research	Ortiz-Castro		Rejected	Book
ACS'+ 'gene expression'+ 'drought stress' + ' plants'+ 'PGPR'	Google scholar	Recent insights into the impact, fate and transport of cerium oxide nanoparticles in the plant-soil continuum	Prakash et al., 2021	The advent of the nanotechnology era offers a unique opportunity for sustainable agriculture provided that the exposure and toxicity are adequately assessed and properly controlled. The global production and application of cerium oxide nanoparticles (CeO2-NPs) in various industrial sectors have tremendously increased. Most of the nanoparticles end up in water and soil where they interact with soi…	Rejected	review
ACS'+ 'gene expression'+ 'drought stress' + ' plants'+ 'PGPR'	Google scholar	Effect of rhizobacteria and cytokinins application on wheat growth and yield under normal vs drought conditions	Zaheer et al., 2019	Drought is a major constraint for agricultural productivity worldwide, and it is likely to further increase. Different strategies are required to mitigate drought stress in plants. In a two-year study that conducted at agronomic research area of the Islamia University of Bahawalpur, we investigated the role of rhizobacteria (RB) and cytokinins (Ck) on drought tolerance, nutrient uptake, yield, an…	Rejected	No ACS
ACS'+ 'gene expression'+ 'drought stress' + ' plants'+ 'PGPR'	Google scholar	Developing Climate-Resilient Chickpea Involving Physiological and Molecular Approaches With a Focus on Temperature and Drought Stresses	Rani et al., 2020	Chickpea is one of the most economically important food legumes, and a significant source of proteins. It is cultivated in more than 50 countries across Asia, Africa, Europe, Australia, North America, and South America. Chickpea production is limited by various abiotic stresses (cold, heat, drought, salt, etc.). Being a winter-season crop in northern south Asia and some parts of the Australia, ch…	Rejected	review
ACS'+ 'gene expression'+ 'drought stress' + ' plants'+ 'PGPR'	Google scholar	Biobased Nanotechnology for Green Applications	Sarma et al., 2021		Rejected	Book
ACS'+ 'gene expression'+ 'drought stress' + ' plants'+ 'PGPR'	Google scholar	Selenium biofortification in the 21st century: status and challenges for healthy human nutrition	Schiavon et al., 2020	Background Selenium (Se) is an essential element for mammals and its deficiency in the diet is a global problem. Plants accumulate Se and thus represent a major source of Se to consumers. Agronomic biofortification intends to enrich crops with Se in order to secure its adequate supply by people. Scope The goal of this review is to report the present knowledge of the distribution and processes of …	Rejected	review
ACS'+ 'gene expression'+ 'drought stress' + ' plants'+ 'PGPR'	Google scholar	Mycorrhizosphere and Pedogenesis	Varma et al., 2019		Rejected	Book
ACS'+ 'gene expression'+ 'drought stress' + ' plants'+ 'PGPR'	Google scholar	Ascophyllum nodosum-Based Biostimulants: Sustainable Applications in Agriculture for the Stimulation of Plant Growth, Stress Tolerance, and Disease Management	Shukla et al., 2019	Abiotic and biotic stresses limit the growth and productivity of plants. In the current global scenario, in order to meet the requirements of the ever-increasing world population, chemical pesticides and synthetic fertilizers are used to boost agricultural production. These harmful chemicals pose a serious threat to the health of humans, animals, plants, and the entire biosphere. To minimize the …	Rejected	review
ACS'+ 'gene expression'+ 'drought stress' + ' plants'+ 'PGPR'	Google scholar	Survey of Genes Involved in Biosynthesis, Transport, and Signaling of Phytohormones with Focus on Solanum lycopersicum	Simm et al., 2016	Phytohormones control the development and growth of plants, as well as their response to biotic and abiotic stress. The seven most well- studied phytohormone classes defined today are as follows: auxins, ethylene, cytokinin, abscisic acid, jasmonic acid, gibberellins, and brassinosteroids. The basic principle of hormone regulation is conserved in all plants, but recent results suggest adaptations…	Accepted
ACS'+ 'gene expression'+ 'drought stress' + ' plants'+ 'PGPR'	Google scholar	A 2-kb Mycovirus Converts a Pathogenic Fungus into a Beneficial Endophyte for Brassica Protection and Yield Enhancement	Zhang et al., 2020	Mycoviruses are viruses that infect fungi, and hypovirulence-associated mycoviruses have the potential to control fungal diseases. However, it is unclear how mycovirus-mediated hypovirulent strains live and sur- vive in the field, and no mycovirus has been applied for field crop protection. In this study, we found that a previously identified small DNA mycovirus (SsHADV-1) can convert its host, S…	Rejected	No abiotic stress
ACS'+ 'gene expression'+ 'drought stress' + ' plants'+ 'PGPR'	Google scholar	Nano-ZnO-Induced Drought Tolerance Is Associated with Melatonin Synthesis and Metabolism in Maize	Sun et al., 2020	The applications of ZnO nanoparticles in agriculture have largely contributed to crop growth regulation, quality enhancement, and induction of stress tolerance, while the underlying mechanisms remain elusive. Herein, the involvement of melatonin synthesis and metabolism in the process of nano-ZnO induced drought tolerance was investigated in maize. Drought stress resulted in the changes of subcel…	Rejected	No PGPR
ACS'+ 'gene expression'+ 'drought stress' + ' plants'+ 'PGPR'	Google scholar	Agronomic Biofortification with Se, Zn, and Fe: An Effective Strategy to Enhance Crop Nutritional Quality and Stress Defense—A Review	Szerement et al., 2022	Human micronutrient deficiencies are a widespread problem worldwide and mainly concern people whose diet (mainly of plant origin) consists of insufficient amounts of critical vitamins and minerals. Low levels of micronutrients in plants are linked to, i.e., their decreasing concentration in soils and/or low bioavailability and presence of abiotic stresses which disturb the proper growth and devel…	Rejected	Review
ACS'+ 'gene expression'+ 'drought stress' + ' plants'+ 'PGPR'	Google scholar	Microbial inoculum development for ameliorating crop drought stress: A case study of Variovorax paradoxus 5C-2	Teijeiro et al., 2020	Drought affects plant hormonal homeostasis, including root to shoot signalling. The plant is intimately con- nected below-ground with soil-dwelling microbes, including plant growth promoting rhizobacteria (PGPR) that can modulate plant hormonal homeostasis. Incorporating PGPR into the rhizosphere often delivers favourable results in greenhouse experiments, while field applications are much less p…	Rejected	Review
ACS'+ 'gene expression'+ 'drought stress' + ' plants'+ 'PGPR'	Google scholar	Molecular Targets and Biological Functions of cAMP Signaling in Arabidopsis	Xu et al., 2021		Rejected	Duplicate
ACS'+ 'gene expression'+ 'drought stress' + ' plants'+ 'PGPR'	Google scholar	Biostimulants in Plant Science: A Global Perspective	Yakhin et al., 2017	This review presents a comprehensive and systematic study of the field of plant biostimulants and considers the fundamental and innovative principles underlying this technology. The elucidation of the biological basis of biostimulant function is a prerequisite for the development of science-based biostimulant industry and sound regulations governing these compounds. The task of defining the biolo…	Rejected	Review
ACS'+ 'gene expression'+ 'drought stress' + ' plants'+ 'PGPR'	Google scholar	Environmental implications of MoS2 nanosheets on rice and associated soil microbial communities	Zhao et al., 2022	Molybdenum disulfide (MoS2) is a transition metal dichalcogenides (TMDCs) material that is seeing rapidly increasing use. The wide range of applications will result in significant environmental release. Here, the impact of MoS2 nano- sheets on rice and associated soil microbial communities was evaluated. Rice plants were grown for 4 weeks in a natural paddy soil amended with either 1T or 2H phase…	Rejected	No ACS
ACS'+ 'gene expression'+ 'drought stress' + ' plants'+ 'PGPR'	Google scholar	Pseudomonas fluorescens DN16 Enhances Cucumber Defense Responses Against the Necrotrophic Pathogen Botrytis cinerea by Regulating Thermospermine Catabolism	Zhu et al., 2021	Plants can naturally interact with beneficial rhizobacteria to mediate defense responses against foliar pathogen infection. However, the mechanisms of rhizobacteria-mediated defense enhancement remain rarely clear. In this study, beneficial rhizobacterial strain Pseudomonas fluorescens DN16 greatly increased the resistance of cucumber plants against Botrytis cinerea infection. RNA-sequencing anal…	Rejected	Biotic stress
ACS'+ 'gene expression'+ 'drought stress' + ' plants'+ 'PGPR'	Google scholar	Microbes in Agriculture and Environmental Development	Das et al., 2020		Rejected	Book
ACS'+ 'gene expression'+ 'drought stress' + ' plants'+ 'PGPR'	Google scholar	Plant growth promoting rhizobacteria and endophytes accelerate phytoremediation of metalliferous soils	Ma et al., 2011		Rejected	Duplicate
ACS'+ 'gene expression'+ 'drought stress' + ' plants'+ 'PGPR'	Google scholar	Siderophore-Producing Rhizobacteria as a Promising Tool for Empowering Plants to Cope with Iron Limitation in Saline Soils: A Review	Ferreira et al., 2019	Iron (Fe) bioavailability to plants is reduced in saline soils; however, the exact mechanisms underlying this effect are not yet completely understood. Siderophore-expressing rhizobacteria may represent a promising alternative to chemical fertilizers by simultaneously tackling salt-stress effects and Fe limitation in saline soils. In addition to draught, plants growing in arid soils face two othe…	Rejected	review
ACS'+ 'gene expression'+ 'drought stress' + ' plants'+ 'PGPR'	Google scholar	What Did We Learn From Current Progress in Heat Stress Tolerance in Plants? Can Microbes Be a Solution?	Ahmad et al., 2022	Temperature is a significant parameter in agriculture since it controls seed germination and plant growth. Global warming has resulted in an irregular rise in temperature posing a serious threat to the agricultural production around the world. A slight increase in temperature acts as stress and exert an overall negative impact on different developmental stages including plant phenology, developme…	Rejected	review
ACS'+ 'gene expression'+ 'drought stress' + ' plants'+ 'PGPR'	Google scholar	Chloroplasts as mediators of plant biotic interactions over short and long distances	Fernandez et al., 2019	n nature, plants interact with numerous other organisms. Some interactions benefit both the plant and the other organism(s), while others lead to disease or even death of the plant hosts. The traditional focus of research into plant biotic interactions has been on the negative effects on plants and the strategies plants use to mitigate or prevent these. Over the last several years there has been …	Rejected	review
ACS'+ 'gene expression'+ 'drought stress' + ' plants'+ 'PGPR'	Google scholar	Uptake and Benefits of Biogenic Phosphorus Nanomaterials Applied via Fertigation to Japonica Rice (Taipei 309) in Low- and High- Calcareous Soil Conditions	Priyam et al., 2022	The application of phosphorus (P)-based nanomaterials (NMs) as fertilizers is suggested as a promising approach in agriculture. Simultaneously, for long-term sustainability, green nanosynthesis, including biosynthesis of NMs, is favored. However, the information of fertilizing effects of biogenic P-based NMs in different P-restricting soil conditions is limited. Here, biologically synthesized nan…	Rejected	No ACS
ACS'+ 'gene expression'+ 'drought stress' + ' plants'+ 'PGPR'	Google scholar	Rhizoremediation prospects of Polyaromatic hydrocarbon degrading T rhizobacteria, that facilitate glutathione and glutathione-S-transferase mediated stress response, and enhance growth of rice plants in pyrene contaminated soil	Singha et al., 2018	Rhizoremediation is a strategy where pollutant degrading bacteria are augmented through plant roots using plant-microbe interaction. Therefore, for effective rhizoremediation of pyrene contaminated soil, bacterial strains were experimented for amelioration of stress response in host plant along with biodegradation ability. A total of 28 bacteria, having ability to degrade polycyclic aromatic hydr…	Rejected	No ACS
ACS'+ 'gene expression'+ 'drought stress' + ' plants'+ 'PGPR'	Google scholar	Bacterial Volatile Compounds as Mediators of Airborne Interactions	Ryu et al., 2020		Rejected	Book
ACS'+ 'gene expression'+ 'drought stress' + ' plants'+ 'PGPR'	Google scholar	Spectrometric and in-silico assessment of the adenylyl cyclase activity of a recombinant clathrin assembly protein from Arabidopsis thaliana	Brandt, 2020		Rejected	Dissertation
ACS'+ 'gene expression'+ 'drought stress' + ' plants'+ 'PGPR'	Google scholar	Microbiome Community Interactions With Social Forestry and Agroforestry	Nath et al., 2020		Rejected	Book chapter
ACS'+ 'gene expression'+ 'drought stress' + ' plants'+ 'PGPR'	Google scholar	L-Aspartate: An Essential Metabolite for Plant Growth and Stress Acclimation	Han et al., 2021	L-aspartate (Asp) serves as a central building block, in addition to being a constituent of proteins, for many metabolic processes in most organisms, such as biosynthesis of other amino acids, nucleotides, nicotinamide adenine dinucleotide (NAD), the tricarboxylic acid (TCA) cycle and glycolysis pathway intermediates, and hormones, which are vital for growth and defense. In animals and humans, li…	Rejected	Review
ACS'+ 'gene expression'+ 'drought stress' + ' plants'+ 'PGPR'	Google scholar	Plant Growth Promotion and Biocontrol by Endophytic and Rhizospheric Microorganisms From the Tropics: A Review and Perspectives	Lacava et al., 2022	Currently, the tropics harbor a wide variety of crops to feed the global population. Rapid population expansion and the consequent major demand for food and agriculture- based products generate initiatives for tropical forest deforestation, which contributes to land degradation and the loss of macro and micronative biodiversity of ecosystems. Likewise, the entire dependence on fertilizers and pes…	Rejected	Review
ACS'+ 'gene expression'+ 'drought stress' + ' plants'+ 'PGPR'	Google scholar	Plant Growth Promoting Actinobacteria A New Avenue for Enhancing the Productivity and Soil Fertility of Grain Legumes	Jacob		Rejected	Book
ACS'+ 'gene expression'+ 'drought stress' + ' plants'+ 'PGPR'	Google scholar	Effect of Piriformospora indica-Induced Systemic Resistance and Basal Immunity Against Rhizoctonia cerealis and Fusarium graminearum in Wheat	Li et al., 2022	Wheat is among the top 10 and most widely grown crops in the world. However, wheat is often infected with many soil-borne diseases, including sharp eyespot, mainly caused by the necrotrophic fungus Rhizoctonia cerealis, and Fusarium head blight (FHB), caused by Fusarium graminearum, resulting in reduced production. Piriformospora indica is a root endophytic fungus with a wide range of host plants…	Rejected	Biotic stress
ACS'+ 'gene expression'+ 'drought stress' + ' plants'+ 'PGPR'	Google scholar	Revisiting Plant–Microbe Interactions and Microbial Consortia Application for Enhancing Sustainable Agriculture	Vishwakarma et al., 2020	The present scenario of agricultural sector is dependent hugely on the use of chemical- based fertilizers and pesticides that impact the nutritional quality, health status, and productivity of the crops. Moreover, continuous release of these chemical inputs causes toxic compounds such as metals to accumulate in the soil and move to the plants with prolonged exposure, which ultimately impact the h…	Rejected	review
ACS'+ 'gene expression'+ 'drought stress' + ' plants'+ 'PGPR'	Google scholar	Language of plant-microbe-microbe interactions in rhizospheric ecosystems	Khare et al., 2020		Rejected	Book chapter
ACS'+ 'gene expression'+ 'drought stress' + ' plants'+ 'PGPR'	Google scholar	Defense-related gene expression in susceptible and tolerant bananas (Musa spp.) following inoculation with non-pathogenic Fusarium oxysporum endophytes and challenge with Radopholus similis	Paparu et al., 2007	Radopholus similis is a major pest of East African highland cooking bananas (Musa spp.) in Uganda. Non-pathogenic Fusarium oxysporum endophytes, isolated from bananas in farmers’ fields, have shown potential to reduce R. similis numbers in tissue culture banana. The mechanism through which endophytes confer resistance to nematodes has previously been demonstrated to involve induced resistance. In…	Rejected	Biotic stress
ACS'+ 'gene expression'+ 'drought stress' + ' plants'+ 'PGPR'	Google scholar	Antioxidants in Plant-Microbe Interaction	Fazeli-Nasab		Rejected	Book
ACS'+ 'gene expression'+ 'drought stress' + ' plants'+ 'PGPR'	Google scholar	Plant Hormones under Challenging Environmental Factors	Waśkiewicz et al., 2016		Rejected	Book
ACS'+ 'gene expression'+ 'drought stress' + ' plants'+ 'PGPR'	Google scholar	Biosensors in Agriculture: Recent Trends and Future Perspectives	Pudake et al., 2021		Rejected	Book
ACS'+ 'gene expression'+ 'drought stress' + ' plants'+ 'PGPR'	Google scholar	Effect of Epichloë gansuensis Endophyte on the Nitrogen Metabolism, Nitrogen Use Efficiency, and Stoichiometry of Achnatherum inebrians under Nitrogen Limitation	Wang et al., 2018	The systemic fungal endophyte of the grass Achnatherum inebrians, Epichloë gansuensis, has important roles in enhancing resistance to biotic and abiotic stresses. In this work, we first evaluated the effects of E. gansuensis on nitrogen metabolism, nitrogen use efficiency, and stoichiometry of A. inebrians under varying nitrogen concentrations. The results demonstrated that E. gansuensis signific…	Rejected	No ACS
ACS'+ 'gene expression'+ 'drought stress' + ' plants'+ 'PGPR'	Google scholar	Biotechnology and Bioinformatics of Endophytes in Biocontrol, Bioremediation, and Plant Growth Promotion	Slama et al., 2021		Rejected	Book chapter
ACS'+ 'gene expression'+ 'drought stress' + ' plants'+ 'PGPR'	Google scholar	Research Advances in the Mutual Mechanisms Regulating Response of Plant Roots to Phosphate Deficiency and Aluminum Toxicity	Chen et al., 2022	Low phosphate (Pi) availability and high aluminum (Al) toxicity constitute two major plant mineral nutritional stressors that limit plant productivity on acidic soils. Advances toward the identification of genes and signaling networks that are involved in both stresses in model plants such as Arabidopsis thaliana and rice (Oryza sativa), and in other plants as well have revealed that some factors…	Rejected	Review
ACS'+ 'gene expression'+ 'drought stress' + ' plants'+ 'PGPR'	Google scholar	Rhizobacteria and Acylated Homoserine Lactone-Based Nanobiofertilizer to Improve Growth and Pathogen Defense in Cicer arietinum and Triticum aestivum Plants	Gahoi et al., 2021	n the current study, we have developed a lightweight nanocomposite biofertilizer (NCB) consisting of a physical mixture of acylated homoserine lactone (AHL)-coated Fe-carbon nanofibers (Fe-CNFs) and bacterial (Panebacillus polymyxa) endospores immobilized in activated carbon beads. AHL/Fe-CNF is translocated to plants via apoplastic movement through roots to shoots and leaves, while the endospore…	Rejected	Biotic stress
ACS'+ 'gene expression'+ 'drought stress' + ' plants'+ 'PGPR'	Google scholar	Environment, Climate, Plant and Vegetation Growth	Sabagh		Rejected	Book
ACS'+ 'gene expression'+ 'drought stress' + ' plants'+ 'PGPR'	Google scholar	Biological and molecular characterization of the response of tomato plants treated with Trichoderma koningiopsis	Moreno et al., 2009	Tomato-Fusarium oxysporum f.sp. radicis-lycopersici pathosystem was used to study induced systemic resistance elicited by Trichoderma koningiopsis (Th003) using the split root model. The ability of the antagonist to promote plant growth was also established. Stem colonization by the pathogen was significantly reduced in treated plants. The induction of resistance was enhanced 6 days after elicita…	Rejected	Biotic stress
ACS'+ 'gene expression'+ 'drought stress' + ' plants'+ 'PGPR'	Google scholar	Biochemical and Molecular Mechanisms of Plant-Microbe-Metal Interactions: Relevance for Phytoremediation	Ma et al., 2016	Plants and microbes coexist or compete for survival and their cohesive interactions play a vital role in adapting to metalliferous environments, and can thus be explored to improve microbe-assisted phytoremediation. Plant root exudates are useful nutrient and energy sources for soil microorganisms, with whom they establish intricate communication systems. Some beneficial bacteria and fungi, actin…	Rejected	Review
ACS'+ 'gene expression'+ 'drought stress' + ' plants'+ 'PGPR'	Google scholar	ACC-Deaminase-Producing Endophyte Brachybacterium paraconglomeratum Strain SMR20 Ameliorates Chlorophytum Salinity Stress via Altering Phytohormone Generation	Barnawal et al., 2016	The higher content of salt in soil is the key constraint to crop productivity. Induction of stress ethylene production from 1-aminocyclopropane-1-carboxylate (ACC) in the plant system is one of the consequences of salt stress responsible for toxicity to the plant. Several transgenic plants have been developed by expressing the ACC deaminase bacterial gene as a stress management strategy which apa…	Rejected	No ACS
ACS'+ 'gene expression'+ 'drought stress' + ' plants'+ 'PGPR'	Google scholar	Foliar Application of SiO2 Nanoparticles Alters Soil Metabolite Profiles and Microbial Community Composition in the Pakchoi ( Brassica chinensis L.) Rhizosphere Grown in Contaminated Mine Soil	Tian et al., 2020	Silica nanoparticles (SiO2-NPs) are promising in nanoenabled agriculture due to their large surface area and biocompatible properties. Understanding the fundamental interaction between SiO2-NPs and plants is important for their sustainable use. Here, 3 week-old pakchoi (Brassica chinensis L.) plants were sprayed with SiO2-NPs every 3 days for 15 days (5 mg of SiO2-NPs per plant), after which the …	Rejected	No ACS
ACS'+ 'gene expression'+ 'drought stress' + ' plants'+ 'PGPR'	Google scholar	Role and significance of biofilm-forming microbes in phytoremediation -A review	Sharma et al., 2022	Heavy metals pollution in the environment is a result of continuous urbanization and industrialization processes, and it has become a major issue for the environment and human health. Microbial biofilms are dense ground communities of microbes kept composed by self-formed polymer matrixes, which are mostly made of polysaccharides, protein complexes, and extracellular DNAs. Phytoremediation is a c…	Rejected	Review
ACS'+ 'gene expression'+ 'drought stress' + ' plants'+ 'PGPR'	Google scholar	The American Halophyte Prosopis strombulifera, a New Potential Source to Confer Salt Tolerance to Crops	Reginato et al., 2012		Rejected	Chapter book
ACS'+ 'gene expression'+ 'drought stress' + ' plants'+ 'PGPR'	Google scholar	Beneficial Relationships Between Endophytic Bacteria and Medicinal Plants	Wu et al., 2021	Plants benefit extensively from endophytic bacteria, which live in host plant tissues exerting no harmful effects. Bacterial endophytes promote the growth of host plants and enhance their resistance toward various pathogens and environmental stresses. They can also regulate the synthesis of secondary metabolites with significant medicinal properties and produce various biological effects. This re…	Rejected	Review
ACS'+ 'gene expression'+ 'drought stress' + ' plants'+ 'PGPR'	Google scholar	Bacillus thuringiensis as a Biofertilizer and Biostimulator: a Mini‐Review of the Little‐Known Plant Growth‐Promoting Properties of Bt	Azizoglu et al., 2019	Bacillus thuringiensis (Bt) is a gram-positive spore-forming soil microorganism. Because the insecticidal activities of Bt are well known, it has been used as a tool for insect pest control worldwide. The beneficial features of Bt are not limited to its role as an insecticide; it is also used to control phytopathogenic fungi via chitinolytic activity. Bt-related studies are mostly focused on its …	Rejected	Review
ACS'+ 'gene expression'+ 'drought stress' + ' plants'+ 'PGPR'	Google scholar	Molecular and physiological manipulations in rhizospheric bacteria	Kaur et al., 2021	The plant growth promoting rhizobacteria (PGPR) has multifarious benefits to serve sustainable agriculture. Different con- sortia of microbes are currently being in use to increase yield of different commercial crops including wheat, canola, lettuce, tomato, banana, maize, chickpea and brinjal. Introduction of PGPR strains can help restore the soil health and prevent the ill effects of fertilizer…	Rejected	Review
ACS'+ 'gene expression'+ 'drought stress' + ' plants'+ 'PGPR'	Google scholar	Bacillus subtilis as a bio-agent combined with nano molecules can control powdery mildew disease through histochemical and physiobiochemical changes in cucumber plants	Hafez et al., 2020	The effect of bio-agent Bacillus subtilus, nano titanium dioxide (TiO2) and Zinc oxide (ZnO) as well as the combination compared with fungicide (Topas100) was investigated under laboratory (in vitro) and greenhouse conditions against powdery mildew disease caused by Podosphaera xanthii. Most of treatments were strong to inhibit the spore germination of P. xanthii. B. subtilus and B. subtilus + na…	Rejected	Biotic stress
ACS'+ 'gene expression'+ 'drought stress' + ' plants'+ 'PGPR'	Google scholar	Alleviation of the toxicity of oily wastewater to canola plants by the N2- T fixing, aromatic hydrocarbon biodegrading bacterium Stenotrophomonas maltophilia-SR1	Bashandy et al., 2020	Soils may be contaminated by oily wastewater during both upstream and downstream oil and gas production processes such as extraction, transportation, and refining. Oil-contaminated sites could nonetheless be used for agricultural purposes in arid regions provided they are managed appropriately. The present study introduces the successful application of a novel nitrogen-fixing, aromatic hydrocarbo…	Rejected	No abiotic stress
ACS'+ 'gene expression'+ 'drought stress' + ' plants'+ 'PGPR'	Google scholar	Fungicide-Tolerant Plant Growth-Promoting Rhizobacteria Mitigate Physiological Disruption of White Radish Caused by Fungicides Used in the Field Cultivation	Khan et al., 2020	Excessive use of fungicides in agriculture may result in substantial accumulation of active residues in soil, which affect crop health and yield. We investigated the response of Raphanus sativus (white radish) to fungicides in soil and potential beneficial interactions of radish plants with fungicide-tolerant plant growth-promoting rhizobacteria (PGPR). The PGPR were isolated from cabbage and mus…	Rejected	Biotic stress
ACS'+ 'gene expression'+ 'drought stress' + ' plants'+ 'PGPR'	Google scholar	Elucidating Drought-Tolerance Mechanisms in Plant Roots through 1H NMR Metabolomics in Parallel with MALDI-MS, and NanoSIMS Imaging Technique	Honeker et al., 2021	As direct mediators between plants and soil, roots play an important role in metabolic responses to environmental stresses such as drought, yet these responses are vastly uncharacterized on a plant-specific level, especially for co-occurring species. Here, we aim to examine the effects of drought on root metabolic profiles and carbon allocation pathways of three tropical rainforest species by com…	Rejected	No ACS
ACS'+ 'gene expression'+ 'drought stress' + ' plants'+ 'PGPR'	Google scholar	Identification and Characterization of Long Non-Coding RNA in Tomato Roots under Salt Stress	Li et al., 2021		Rejected	No PGPR
ACS'+ 'gene expression'+ 'drought stress' + ' plants'+ 'PGPR'	Google scholar	Microbial Derived Compounds, a Step Toward Enhancing Microbial Inoculants Technology for Sustainable Agriculture.	Naamala et al., 2021	Sustainable agriculture remains a focus for many researchers, in an effort to minimize environmental degradation and climate change. The use of plant growth promoting microorganisms (PGPM) is a hopeful approach for enhancing plant growth and yield. However, the technology faces a number of challenges, especially inconsistencies in the field. The discovery, that microbial derived compounds can ind…	Rejected	review
ACS'+ 'gene expression'+ 'drought stress' + ' plants'+ 'PGPR'	Google scholar	Plant anti-aging: Delayed flower and leaf senescence in Erinus alpinus treated with cell-free Chlorella cultivation medium	Lee et al., 2020	Plant tissues naturally senesce over time. Attempts to improve plant robustness and increase longevity have involved genetic modification, application of synthetic chemicals, and use of beneficial microbes. Recently, culture supernatant from a microalga Chlorella fusca was found to prime innate immunity against Pseudomonas syringae in Arabidopsis thaliana. However, the capacity of Chlorella cultu…	Rejected	review
ACS'+ 'gene expression'+ 'drought stress' + ' plants'+ 'PGPR'	Google scholar	Ethylene Response Factor (ERF) genes modulate plant root exudate composition and the attraction of plant parasitic nematodes	Dyer et al., 2019	Plant root exudates are compositionally diverse, plastic and adaptive. Ethylene signalling influences the attraction of plant parasitic nematodes, presumably through the modulation of root exudate composi- tion. Understanding this pathway could lead to new sources of crop parasite resistance. Here we used Virus-Induced Gene Silencing to knock down the expression of two Ethylene Response Factor (E…	Rejected	Review
ACS'+ 'gene expression'+ 'drought stress' + ' plants'+ 'PGPR'	Google scholar	Effects of Silicon and Silicon-Based Nanoparticles on Rhizosphere Microbiome, Plant Stress and Growth	Rajput et al., 2021	Silicon (Si) is considered a non-essential element similar to cadmium, arsenic, lead, etc., for plants, yet Si is beneficial to plant growth, so it is also referred to as a quasi-essential element (similar to aluminum, cobalt, sodium and selenium). An element is considered quasi-essential if it is not required by plants but its absence results in significant negative consequences or anomalies in …	Rejected	review
ACS'+ 'gene expression'+ 'drought stress' + ' plants'+ 'PGPR'	Google scholar	Plant growth-promoting root-colonizing bacterial endophytes	Adeleke et al., 2021	The development of an environmentally friendly agricultural system as opposed to conventional methods using chemical fertilizers and pesticides for improved crop productivity is a promising aspect of modern agricultural biotechnology. Current research has focused on using free-living microbes that can colonize the plant endosphere as a means of enhancing crop productivity. In the plant rhizospher…	Rejected	review
ACS'+ 'gene expression'+ 'drought stress' + ' plants'+ 'PGPR'	Google scholar	Fatty Acid–Derived Signals in Plant Defense	Kachroo et al., 2009	Fatty acids (FAs) consist of long hydrophobic, often unbranched chains of hydrocarbons, with hydrophilic carboxylic acid groups at one end. They are an important source of reserve energy and essential compo- nents of membrane lipids in all living organisms. In plants, FA metabolic pathways play significant roles in pathogen defense. Historically, FAs were only assigned passive roles in plant defe…	Rejected	review
ACS'+ 'gene expression'+ 'drought stress' + ' plants'+ 'PGPR'	Google scholar	The need to breed crop varieties suitable for organic farming, using wheat, tomato and broccoli as examples: A review	Lammerts van Bueren et al., 2009	It is estimated that more than 95% of organic production is based on crop varieties that were bred for the conventional high-input sector. Recent studies have shown that such varieties lack important traits required under organic and low-input production conditions. This is primarily due to selection in con- ventional breeding programmes being carried out in the background of high inorganic ferti…	Rejected	Review
ACS'+ 'gene expression'+ 'drought stress' + ' plants'+ 'PGPR'	Google scholar	Soil sustainable utilization technology: mechanism of flavonols in resistance process of heavy metal	Li et al., 2018	The soil ecosystem is critical for agricultural production, affecting many aspects of human health. Soil has more unknown biodiversity and edaphic parameters than any other ecosystem especially when polluted. Metagenomics and metatranscriptomics were applied to research on toxicological characteristics of Pb and resistance mechanism of flavonols. Rhizosphere microorganisms–plants system, a unifie…	Rejected	No ACS
ACS'+ 'gene expression'+ 'drought stress' + ' plants'+ 'PGPR'	Google scholar	Mitigation of Salinity Stress Effects on Broad Bean Productivity Using Calcium Phosphate Nanoparticles Application	Nasrallah et al., 2022	Water salinity is one of the major abiotic stresses, and the use of saline water for the agricultural sector will incur greater demand in the coming decades. Recently, nanoparticles (NPs) have been used for developing numerous plant fertilizers as a smart and powerful form of material with dual action that can alleviate the adverse effects of salinity and provide the plant with more efficient nut…	Rejected	No ACS
ACS'+ 'gene expression'+ 'drought stress' + ' plants'+ 'PGPR'	Google scholar	Spatio-temporal dynamics in global rice gene expression (Oryza sativa L.) in response to high ammonium stress	Sun et al., 2017		Rejected	Duplicate
ACS'+ 'gene expression'+ 'drought stress' + ' plants'+ 'PGPR'	Google scholar	Cadmium Phytotoxicity, Tolerance, and Advanced Remediation Approaches in Agricultural Soils; A Comprehensive Review	Zulfiqar et al., 2022	Cadmium (Cd) is a major environmental contaminant due to its widespread industrial use. Cd contamination of soil and water is rather classical but has emerged as a recent problem. Cd toxicity causes a range of damages to plants ranging from germination to yield suppression. Plant physiological functions, i.e., water interactions, essential mineral uptake, and photosynthesis, are also harmed by Cd…	Rejected	Review
ACS'+ 'gene expression'+ 'drought stress' + ' plants'+ 'PGPR'	Google scholar	Shifting Perspectives of Translational Research in Bio-Bactericides: Reviewing the Bacillus amyloliquefaciens Paradigm	Dimopoulou et al., 2021	Bacterial biological control agents (BCAs) have been increasingly used against plant diseases. The traditional approach to manufacturing such commercial products was based on the selection of bacterial species able to produce secondary metabolites that inhibit mainly fungal growth in optimal media. Such species are required to be massively produced and sustain long-term self- storage. The endpoin…	Rejected	Review
ACS'+ 'gene expression'+ 'drought stress' + ' plants'+ 'PGPR'	Google scholar	Review: Biological functions of major latex-like proteins in plants	Fujita et al., 2021	Major latex-like proteins (MLPs) have been identified in dicots and monocots. They are members of the birch pollen allergen Bet v 1 family as well as pathogenesis-related proteins class 10. MLPs have two main features. One is binding affinity toward various hydrophobic compounds, such as long-chain fatty acids, steroids, and systemic acquired resistance signals, via its internal hydrophobic cavit…	Rejected	review
ACS'+ 'gene expression'+ 'drought stress' + ' plants'+ 'PGPR'	Google scholar	Nanosilica facilitates silica uptake, growth and stress tolerance in plants	Mathur et al., 2020	Nanobiotechnology has gained considerable momentum in the field of plant sciences in the last few years. Nanomaterials of various metal oxides has been utilized for enhancing growth, productivity and in crop pro- tection strategies. Among them, nanosilica has emerged as a key player in orchestrating plant growth and conferring tolerance to various abiotic and biotic stresses. Nanosilica has incre…	Rejected	review
ACS'+ 'gene expression'+ 'drought stress' + ' plants'+ 'PGPR'	Google scholar	Biochar amendments and its impact on soil biota for sustainable agriculture	Pathy et al., 2020	Beneficial microbes in soil biota are known to enhance plant growth by stimulating the nutrient supply and by devising certain mechanisms to cope up with the biotic (diseases) or abiotic (salinity, drought, and pollution) stresses. Owing to their effectiveness and sustainability concerns, the application of microbes in the agricultural sector has seen a positive surge recently. Biochar has been c…	Rejected	review
ACS'+ 'gene expression'+ 'drought stress' + ' plants'+ 'PGPR'	Google scholar	Plenty Is No Plague: Streptomyces Symbiosis with Crops	Rey et al., 2017	Streptomyces spp. constitute a major clade of the phylum Actinobacteria. These Gram-positive, filamentous prokaryotes are ubiquitous in soils and marine sediments, and are commonly found in the rhizosphere or inside plant roots. Plant-interacting Streptomyces have received limited attention, in con- trast to Streptomyces spp. extensively investigated for decades in medicine given their rich poten…	Rejected	review
acs AND gene AND expression AND drought AND stress AND plants AND pgpr	Scopus	Plant growth-promoting root-colonizing bacterial endophytes	Adeleke et al., 2021		Rejected	Duplicate
acs AND gene AND expression AND drought AND stress AND plants AND pgpr	Scopus	Slaked lime improves growth, antioxidant capacity and reduces Cd accumulation of peanut (Arachis hypogaea L.) under Cd stress	Zhang et al., 2022	Slaked lime has been used to remediate contaminated agricultural soils as an in situ chemical immobilization amendment for a long time. However, the effects of slaked lime on peanut and soil cadmium (Cd) levels remain poorly understood with respect to remediating Cd-contaminated soil. In this study, six rates of slaked lime (e.g., 0, 300, 600, 900, 1200 and 1500 kg ha−1) were applied to evaluate …	Rejected	No PGPR
acs AND gene AND expression AND drought AND stress AND plants AND pgpr	Scopus	Molecular mechanism of mulberry response to drought stress revealed by complementary transcriptomic and iTRAQ analyses	Li et al., 2022	Background: The use of mulberry leaves has long been limited to raising silkworms, but with the continuous improvement of mulberry (Morus alba) resource development and utilization, various mulberry leaf extension prod- ucts have emerged. However, the fresh leaves of mulberry trees have a specific window of time for picking and are susceptible to adverse factors, such as drought stress. Therefore…	Rejected	No PGPR
acs AND gene AND expression AND drought AND stress AND plants AND pgpr	Scopus	Ameliorating the performance of NPK biofertilizers to attain sustainable agriculture with special emphasis on bioengineering	Ghorai et al., 2022	Food security is the world's most pressing challenge as populations grow. Globally, green revolution practices increase the use of chemically manufactured fertilizers, which have an influence on soil dynamics and disturb typical soil biodiversity. Thus, a paradigm shift is required to improve the eco-friendly potential of microbial biofertilizers in soil. Hence, this concise review explicates rec…	Rejected	review
acs AND gene AND expression AND drought AND stress AND plants AND pgpr	Scopus	Role of plant growth-promoting rhizobacteria in boosting the phytoremediation of stressed soils: Opportunities, challenges, and prospects	Bhanse et al., 2022	Soil is considered as a vital natural resource equivalent to air and water which supports growth of the plants and provides habitats to microorganisms. Changes in soil properties, productivity, and, inevitably contamination/ stress are the result of urbanisation, industrialization, and long-term use of synthetic fertiliser. Therefore, in the recent scenario, reclamation of contaminated/stressed s…	Rejected	review
acs AND gene AND expression AND drought AND stress AND plants AND pgpr	Scopus	Claroideoglomus etunicatum affects the structural and functional genes of the rhizosphere microbial community to help maize resist Cd and La stresses	Hao et al., 2022	Arbuscular mycorrhizal fungi (AMF) and plant rhizosphere microbes reportedly enhance plant tolerance to abiotic stresses and promote plant growth in contaminated soils. The co-contamination of soil by heavy metals (e. g., Cd) and rare earth elements (e.g., La) represents a severe environmental problem. Although the influence of AMF in the phytoremediation of contaminated soils is well documented,…	Rejected	No ACS
acs AND gene AND expression AND drought AND stress AND plants AND pgpr	Scopus	Salinity effects on rice, rice weeds, and strategies to secure crop productivity and effective weed control. A review	Korres et al., 2022	This study is the first one that examines simultaneously the direct and indirect effects of soil salinity on rice and rice weeds and suggests solutions to secure both rice production and effective weed control. Salinity negatively impairs growth, reproduction, and rice grain yield. Several studies have addressed the effects of salinity on rice yield when plants are exposed to salinity stress eith…	Rejected	review
acs AND gene AND expression AND drought AND stress AND plants AND pgpr	Scopus	Microbiome-based screening and co-fermentation of rhizospheric microorganisms for highly ginsenoside Rg3 production	Qi et al., 2022	Ginsenoside Rg3 has a wide range of pharmacological activities and application value while the content of Rg3 in Panax plants is extremely low. The interaction between medicinal plants and microorganisms will be beneficial to produce active compounds by biotechnology. In this study, the rhizosphere soil samples from different P. notoginseng producing areas (Asanlong, Huilong, Demonstration garden…	Rejected	No abiotic stress
acs AND gene AND expression AND drought AND stress AND plants AND pgpr	Scopus	Rhizospheric plant-microbe synergistic interactions achieve efficient arsenic phytoextraction by Pteris vittata	Yang et al., 2022	Phytoextraction is a cost-effective and eco-friendly technology to remove arsenic (As) from contaminated soil using plants and associated microorganisms. Pteris vittata is the most studied As hyperaccumulator, which effectively takes up inorganic arsenate via roots. Arsenic solubilization and speciation occur prior to plant ab- sorption in the rhizosphere, which play a key role in As phytoextract…	Rejected	No abiotic stress
acs AND gene AND expression AND drought AND stress AND plants AND pgpr	Scopus	Arbuscular mycorrhizal fungi and production of secondary metabolites in medicinal plants	Zhao et al., 2022	Medicinal plants are an important source of therapeutic compounds used in the treatment of many diseases since ancient times. Interestingly, they form associations with numerous microorganisms developing as endophytes or symbionts in different parts of the plants. Within the soil, arbuscular mycorrhizal fungi (AMF) are the most prevalent symbiotic microorganisms forming associations with more tha…	Rejected	review
acs AND gene AND expression AND drought AND stress AND plants AND pgpr	Scopus	A critical analysis on the roles of exopolysaccharides and ACC deaminase in salinity stress tolerance in crop plants	Dutta et al., 2022	Soil salinity is a big problem in present day agriculture. Salinity diminishes crop productivity which needs immediate solution as there is ever-growing demand for food. Plant scientists are searching for new strategies to combat these stress and in this line rhizosphere engineering using plant growth promoting rhizobiacteria is showing huge promise. In our current article we have critically look…	Rejected	review
acs AND gene AND expression AND drought AND stress AND plants AND pgpr	Scopus	The role and mechanism of commercial macroalgae for soil conditioner and nutrient uptake catalyzer	Ma et al., 2022	The growing demand for chemical fertilizer with low utilization and environmental pollution has been issuing challenges to sustainable production of agricultural field. Due to internal nutrient elements and active substances, macroalgae have drawn the interest of agricultural and algal researchers. However, their major functions seem to center on improvement of nutrient utilization efficiency, mo…	Rejected	No abiotic stress
acs AND gene AND expression AND drought AND stress AND plants AND pgpr	Scopus	Integrated mechanism of heavy metal bioremediation from soil to rice (Oryza sativa L.) mediated by Enterococcus faecium	Cheng et al., 2022	The growth and physiological metabolism of plants have been shown to be strongly inhibited by the presence of high levels of heavy metals. Among all heavy metal elements, cadmium (Cd) has been considered to be one of the heavy metals that poses the greatest threat to agriculture and human health. In this study, a Cd-resistant bacterial strain 2–6 was isolated. The strain was later assigned to the…	Rejected	No PGPR
acs AND gene AND expression AND drought AND stress AND plants AND pgpr	Scopus	Meta-omics of endophytic microbes in agricultural biotechnology	Adeleke et al., 2022	Endophytic studies are becoming popular with the current advancement in microbial ecology. The internal tissue of the plant represents a discreet region for diverse endophytic microbes to flourish for plant nutrition through the uptake of essential nutrient (i.e. nitrogen, phosphorus, and potassium) synthesis of phytohormones, metabolic compounds, organic acids, siderophores, and hydrolytic enzym…	Rejected	review
acs AND gene AND expression AND drought AND stress AND plants AND pgpr	Scopus	Phytoremediation: Mechanisms, plant selection and enhancement by natural and synthetic agents	Kafle et al., 2022	With current intensive agriculture practices and industrialization, pollution of natural resources like land and water with heavy metals, organic pollutants, radionuclides, pesticides, and fertilizers has become a major concern. Phytoremediation is a cost-effective and environmentally friendly technique that utilizes plants to immobilize, uptake, reduce toxicity, stabilize, or degrade the compoun…	Rejected	review
acs AND gene AND expression AND drought AND stress AND plants AND pgpr	Scopus	Rhizobacteria communities reshaped by red mud based passivators is vital for reducing soil Cd accumulation in edible amaranth	Xu et al., 2022	Red mud (RM) was constantly reported to immobilize soil cadmium (Cd) and reduce Cd uptake by crops, but few studies investigated whether and how RM influenced rhizobacteria communities, which was a vital factor determining Cd bio- availability and plant growth. To address this concern, high-throughput sequencing and bioinformatics were used to an- alyze microbiological mechanisms underlying RM ap…	Rejected	No stress abiotico
acs AND gene AND expression AND drought AND stress AND plants AND pgpr	Scopus	Extending the benefits of PGPR to bioremediation of nitrile pollution in crop lands for enhancing crop productivity	Vaishnav et al., 2020	Incessant release of nitrile group of compounds such as cyanides into agricultural land through industrial effluents and excessive use of nitrile pesticides has resulted in increased nitrile pollution. Release of nitrile compounds (NCs) as plant root exudates is also contributing to the problem. The released NCs interact with soil elements and persists for a long time. Persistent higher concentra…	Rejected	review
acs AND gene AND expression AND drought AND stress AND plants AND pgpr	Scopus	Nano-engineering metal-based fertilizers using biopolymers: An innovative strategy for a more sustainable agriculture	Dhlamini et al., 2022	Ongoing pandemic has put a strain on food productivity and induced a significant increase in food demands. Even before this scenario, acute hunger has been on the rise in developing countries due to rapid population growth, climate change and socio-economic conditions. In this context, the use of bulky chemically processed fertilizers has been promoted in recent decades to improve agricultural pr…	Rejected	review
acs AND gene AND expression AND drought AND stress AND plants AND pgpr	Scopus	Insight into soil nitrogen and phosphorus availability and agricultural sustainability by plant growth‑promoting rhizobacteria	Zeng et al., 2022		Rejected	Duplicate
acs AND gene AND expression AND drought AND stress AND plants AND pgpr	Scopus	Prospecting potential of endophytes for modulation of biosynthesis of therapeutic bioactive secondary metabolites and plant growth promotion of medicinal and aromatic plants	Singh et al., 2022	Medicinal and aromatic plants possess pharmacological properties (antidiabetes, anticancer, antihypertension, anticardiovascular, antileprosy, etc.) because of their potential to synthesize a wide range of therapeutic bioactive secondary metabolites. The concentration of bioactive secondry metabolites depends on plant species, local environment, soil type and internal microbiome. The internal mic…	Rejected	review
acs AND gene AND expression AND drought AND stress AND plants AND pgpr	Scopus	Bacillus amyloliquefaciens as an excellent agent for biofertilizer and biocontrol in agriculture: An overview for its mechanisms	Luo et al., 2022	Bacillus amyloliquefaciens (BA) is one of the most promising bacteria for plant growth promotion (PGP) without harmful side effects. As an excellent agent for biofertilizer and biocontrol in agriculture, the PGP mechanisms of BA have been studied extensively. However, these studies have been rarely summarized, although it could hinder a better understanding of BA strains’ potential mechanisms and…	Rejected	review
acs AND gene AND expression AND drought AND stress AND plants AND pgpr	Scopus	Helping plants to deal with heavy metal stress: the role of nanotechnology and plant growth promoting rhizobacteria in the process of phytoremediation	Gulzar et al., 2022		Rejected	Duplicate
acs AND gene AND expression AND drought AND stress AND plants AND pgpr	Scopus	Coactive role of zinc oxide nanoparticles and plant growth promoting rhizobacteria for mitigation of synchronized effects of heat and drought stress in wheat plants	Azmat et al., 2022		Rejected	Duplicate
acs AND gene AND expression AND drought AND stress AND plants AND pgpr	Scopus	Combined effects of oxytetracycline and microplastic on wheat seedling growth and associated rhizosphere bacterial communities and soil metabolite profiles	Guo et al., 2022	The widespread application of antibiotics and plastic films in agriculture leads to new characteristics of soil pollution with the coexistence of antibiotics and microplastics. However, their combined effects on wheat seedling growth and associated rhizosphere bacterial communities and soil metabolite profiles remain unclear. Here, in the potted experiment, wheat was treated with individual oxyte…	Rejected	No abiotic stress
acs AND gene AND expression AND drought AND stress AND plants AND pgpr	Scopus	Transcriptome Changes Induced by Botrytis cinerea Stress and Weighted Gene Co‑expression Network Analysis (WGCNA) in Actinidia chinensis	Li et al., 2022	Kiwifruit (Actinidia chinensis) is rich in dietary fiber and vitamin C and has high commercial value. However, it is susceptible to Botrytis cinerea pathogenesis. This fungus causes gray mold rot which negatively impacts kiwifruit quality. It also induces changes in superoxide dismutase, peroxidase, and catalase activity. Peroxidase and superoxide dismutase activities were detected at 1 dpi, incr…	Rejected	Biotic stress
acs AND gene AND expression AND drought AND stress AND plants AND pgpr	Scopus	Effects of Biostimulants in Horticulture, with Emphasis on Ornamental Plant Production	Kisvarga et al., 2022	The biostimulant segment is becoming increasingly important worldwide. One of the reasons for this is that fewer plant protection products are placed on the market in the European Union, and environmental sustainability also plays an important role in their use. Biostimulants are often used in several horticultural sectors, including ornamentals, to strengthen plants, achieve commercial standards…	Rejected	review
acs AND gene AND expression AND drought AND stress AND plants AND pgpr	Scopus	Combined effects of oxytetracycline and microplastic on wheat seedling growth and associated rhizosphere bacterial communities and soil metabolite profiles	Guo et al., 2022		Rejected	Duplicate
acs AND gene AND expression AND drought AND stress AND plants AND pgpr	Scopus	Transcriptome Changes Induced by Botrytis cinerea Stress and Weighted Gene Co‑expression Network Analysis (WGCNA) in Actinidia chinensis	Li et al., 2022		Rejected	Duplicate
acs AND gene AND expression AND drought AND stress AND plants AND pgpr	Scopus	Effects of Biostimulants in Horticulture, with Emphasis on Ornamental Plant Production	Kisvarga et al., 2022		Rejected	Duplicate
acs AND gene AND expression AND drought AND stress AND plants AND pgpr	Scopus	Synergistic action of Trichoderma koningiopsis and T. asperellum mitigates salt stress in paddy	Anshu et al., 2022	Intensive cultivation increases the salinity and alkalinity of soil leading to its degradation. Such soil lead to abiotic stress conditions in plants causing ROS-mediated cellular damage. Microbes constitute an important group of bio-stimulants, which are promising alternatives to reduce ROS-mediated abiotic stresses and improve plant growth. In the present study synergistic activity of stress-to…	Rejected	Fungi
acs AND gene AND expression AND drought AND stress AND plants AND pgpr	Scopus	Climate-Resilient Microbial Biotechnology: A Perspective on Sustainable Agriculture	Tan et al., 2022	We designed this review to describe a compilation of studies to enlighten the concepts of plant–microbe interactions, adopted protocols in smart crop farming, and biodiversity to reaf-firm sustainable agriculture. The ever-increasing use of agrochemicals to boost crop production has created health hazards to humans and the environment. Microbes can bring up the hidden strength of plants, augmenti…	Rejected	review
acs AND gene AND expression AND drought AND stress AND plants AND pgpr	Scopus	Utilization of Legume-Nodule Bacterial Symbiosis in Phytoremediation of Heavy Metal-Contaminated Soils	Jach et al., 2022	With the increasing industrial activity of the growing human population, the accumulation of various contaminants in soil, including heavy metals, has increased rapidly. Heavy metals as non-biodegradable elements persist in the soil environment and may pollute crop plants, further accumulating in the human body causing serious conditions. Hence, phytoremediation of land contamination as an enviro…	Rejected	review
acs AND gene AND expression AND drought AND stress AND plants AND pgpr	Scopus	Lipo-Chitooligosaccharides (LCOs) as Elicitors of the Enzymatic Activities Related to ROS Scavenging to Alleviate Oxidative Stress Generated in Tomato Plants under Stress by UV-B Radiation	Lucas et al., 2022	Exposure to ultraviolet-B (UV-B) radiation can lead to oxidative damage in plants, increasing reactive oxygen species (ROS) production. To overcome ROS burst, plants have antioxidant mechanisms related to ROS scavenging which can be improved by elicitation with biological agents or derived molecules (elicitors), as they can trigger a physiological alert state called “priming”. This work describes…	Rejected	review
acs AND gene AND expression AND drought AND stress AND plants AND pgpr	Scopus	Molecular Regulation of Cotton Fiber Development: A Review	Jan et al., 2022	Cotton (Gossypium spp.) is an economically important natural fiber crop. The quality of cotton fiber has a substantial effect on the quality of cotton textiles. The identification of cotton fiber development-related genes and exploration of their biological functions will not only enhance our understanding of the elongation and developmental mechanisms of cotton fibers but also provide insights t…	Rejected	review
acs AND gene AND expression AND drought AND stress AND plants AND pgpr	Scopus	Plants—Microorganisms-Based Bioremediation for Heavy Metal Cleanup: Recent Developments, Phytoremediation Techniques, Regulation Mechanisms, and Molecular Responses	Raklami et al., 2022	Rapid industrialization, mine tailings runoff, and agricultural activities are often detrimental to soil health and can distribute hazardous metal(loid)s into the soil environment, with harmful effects on human and ecosystem health. Plants and their associated microbes can be deployed to clean up and prevent environmental pollution. This green technology has emerged as one of the most attractive …	Rejected	review
acs AND gene AND expression AND drought AND stress AND plants AND pgpr	Scopus	Native Heavy Metal-Tolerant Plant Growth Promoting Rhizobacteria Improves Sulla spinosissima (L.) Growth in Post-Mining Contaminated Soils	Oubohssaine et al., 2022	The potential of rhizobacteria in assisting plants used in the phytostabilization or re-vegetation of soils contaminated by heavy metals is gaining interest all around the world. In this context, six rhizobacterial strains isolated from highly heavy metal-contaminated soils situated in abandoned mining sites around the Oujda region (Morocco) were tested with Sulla spinosissima (L.), a native legu…	Rejected	No ACS
acs AND gene AND expression AND drought AND stress AND plants AND pgpr	Scopus	Arbuscular mycorrhizae: natural modulators of plant–nutrient relation and growth in stressful environments	Thangavel et al., 2022	The human population is increasing by 0.96% annually and is estimated to reach from 7.3 to 9 billion in 2050 and 11 billion in 2100. The world’s agriculture is under pressure to produce more food and ensure food security. On the other hand, around 40% of the cultivable land is already degraded due to various factors including urbanization, soil sealing, soil acidification, salinization, soil eros…	Rejected	review
acs AND gene AND expression AND drought AND stress AND plants AND pgpr	Scopus	Beijerinckia fluminensis BFC-33, a novel multi-stress-tolerant soil bacterium: Deciphering the stress amelioration, phytopathogenic inhibition and growth promotion in Triticum aestivum (L.)	AL-Shwaiman et al., 2022		Rejected	Duplicate
acs AND gene AND expression AND drought AND stress AND plants AND pgpr	Scopus	Harnessing plant microbiome for mitigating arsenic toxicity in sustainable agriculture	Ali et al., 2022	Heavy metal toxicity has become an impediment to agricultural productivity, which presents major human health concerns in terms of food safety. Among them, arsenic (As) a non-essential heavy metal has gained worldwide attention because of its noxious effects on agriculture and public health. The increasing rate of global warming and anthropogenic activities have promptly exacerbated As levels in …	Rejected	Review
acs AND gene AND expression AND drought AND stress AND plants AND pgpr	Scopus	Ameliorative effects of plant growth promoting bacteria, zinc oxide nanoparticles and oxalic acid on Luffa acutangula grown on arsenic enriched soil	Tanveer et al., 2022	Arsenic (As) contamination and bioaccumulation are a serious threat to agricultural plants. To address this issue, we checked the efficacy of As tolerant plant growth promoting bacteria (PGPB), zinc oxide nanoparticles (ZnO NPs) and oxalic acid (OA) in Luffa acutangula grown on As rich soil. The selected most As tolerant PGPB i.e Providencia vermicola exhibited plant growth promoting features i.e…	Rejected	No ACS
acs AND gene AND expression AND drought AND stress AND plants AND pgpr	Scopus	Biofilm-mediated bioremediation is a powerful tool for the removal of environmental pollutants	Mishra et al., 2022	Biofilm-mediated bioremediation is an attractive approach for the elimination of environmental pollutants, because of its wide adaptability, biomass, and excellent capacity to absorb, immobilize, or degrade contaminants. Biofilms are assemblages of individual or mixed microbial cells adhering to a living or non-living surface in an aqueous environment. Biofilm-forming microorganisms have excellen…	Rejected	Review
acs AND gene AND expression AND drought AND stress AND plants AND pgpr	Scopus	Foliar-applied cerium oxide nanomaterials improve maize yield under salinity stress: Reactive oxygen species homeostasis and rhizobacteria regulation	Liu et al., 2021		Rejected	Duplicate
acs AND gene AND expression AND drought AND stress AND plants AND pgpr	Scopus	Alleviative mechanisms of silicon solubilizing Bacillus amyloliquefaciens mediated diminution of arsenic toxicity in rice	Bist et al., 2022		Rejected	Duplicate
acs AND gene AND expression AND drought AND stress AND plants AND pgpr	Scopus	Amelioration of Chromium-Induced Oxidative Stress by Combined Treatment of Selected Plant-Growth-Promoting Rhizobacteria and Earthworms via Modulating the Expression of Genes Related to Reactive Oxygen Species Metabolism in Brassica juncea.	Sharma et al., 2022		Rejected	Duplicate
acs AND gene AND expression AND drought AND stress AND plants AND pgpr	Scopus	Impact of Pseudomonas sp. SVB-B33 on Stress- and Cell Wall-Related Genes in Roots and Leaves of Hemp under Salinity	Berni et al., 2022		Rejected	Duplicate
acs AND gene AND expression AND drought AND stress AND plants AND pgpr	Scopus	Metabolomics as an emerging tool to study plant–microbe interactions	Gupta et al., 2022	In natural environments, interaction between plant roots and microorganisms are common. These interactions between microbial species and plants inhabited by them are being studied using various techniques. Metabolomics research based on mass spectrometric techniques is one of the crucial approaches that underpins system biology and relies on precision instrument analysis. In the last decade, this…	Rejected	review
acs AND gene AND expression AND drought AND stress AND plants AND pgpr	Scopus	Cadmium-Tolerant Plant Growth-Promoting Bacteria Curtobacterium oceanosedimentum Improves Growth Attributes and Strengthens Antioxidant System in Chili (Capsicum frutescens)	Patel et al., 2022	The remediation of potentially toxic element-polluted soils can be accomplished throughthe use of microbial and plant-assisted bioremediation. A total of 32 bacteria were isolated from soil samples contaminated with potentially toxic elements. The isolated bacterial strain DG-20 showed high tolerance to cadmium (up to 18 mM) and also showed bioaccumulative Cd removal properties, as demonstrated b…	Rejected	No ACS
acs AND gene AND expression AND drought AND stress AND plants AND pgpr	Scopus	Titanium and Zinc Based Nanomaterials in Agriculture: A Promising Approach to Deal with (A)biotic Stresses?	Silva et al., 2022	Abiotic stresses, such as those induced by climatic factors or contaminants, and biotic stresses prompted by phytopathogens and pests inflict tremendous losses in agriculture and are major threats to worldwide food security. In addition, climate changes will exacerbate these factors as well as their negative impact on crops. Drought, salinity, heavy metals, pesticides, and drugs are major environ…	Rejected	review
acs AND gene AND expression AND drought AND stress AND plants AND pgpr	Scopus	Recent Trends in Microbial Approaches for Soil Desalination	Mokrani et al., 2022	Soil salinization has become a major problem for agriculture worldwide, especially because this phenomenon is continuously expanding in different regions of the world. Salinity is a complex mechanism, and in the soil ecosystem, it affects both microorganisms and plants, some of which have developed efficient strategies to alleviate salt stress conditions. Currently, various methods can be used to…	Rejected	review
acs AND gene AND expression AND drought AND stress AND plants AND pgpr	Scopus	Biocontrol Methods in Avoidance and Downsizing of Mycotoxin Contamination of Food Crops	Zadravec et al., 2022	By increasing the resistance of seeds against abiotic and biotic stress, the possibility of cereal mold contamination and hence the occurrence of secondary mold metabolites mycotoxins decreases. The use of biological methods of seed treatment represents a complementary strategy, which can be implemented as an environmental-friendlier approach to increase the agricultural sustainability. Whereas t…	Rejected	review
acs AND gene AND expression AND drought AND stress AND plants AND pgpr	Scopus	Nanofertilizers for agricultural and environmental sustainability	Babu et al., 2022	Indiscriminate use of chemical fertilizers in the agricultural production systems to keep pace with the food and nutritional demand of the galloping population had an adverse impact on ecosystem services and environmental quality. Hence, an alternative mechanism is to be developed to enhance farm production and environmental sustainability. A nanohybrid construct like nanofertilizers (NFs) is an …	Rejected	Review
acs AND gene AND expression AND drought AND stress AND plants AND pgpr	Scopus	Integrated analysis of transcriptomics and small RNA reveals that 1-MCP inhibits lignocellulosis of fresh common beans by regulating secondary cell wall metabolism	Xie et al., 2022	Postharvest 1-MCP treatment effectively inhibits the lignofibrosis of fresh common beans, but its underlying regulatory mechanism is not well understood. The results showed that 1-MCP inhibited the metabolism of ethylene and cell wall component at 15 d of storage. These results showed that the 15 d of storage is critical time for 1-MCP to regulate the lignofibrosis of fresh common beans. 5882 dif…	Rejected	No abiotic stress
acs AND gene AND expression AND drought AND stress AND plants AND pgpr	Scopus	The use of microbial inoculants for biological control, plant growth promotion, and sustainable agriculture: A review	Elnahal et al., 2022	Microbial control agents serve as alternatives to synthetic pesticides for the management of insect pests and plant pathogens. Naturally occurring microorganisms such as bacteria, fungi, and protozoa may be beneficial, pathogenic, or neutral to host plants. This review focuses on the potential role of useful microorganisms as biofertilizers or biopesticides in sustaining and enhancing crop produc…	Rejected	Review
acs AND gene AND expression AND drought AND stress AND plants AND pgpr	Scopus	Nanofertilizers for agricultural and environmental sustainability	Babu et al., 2022		Rejected	Duplicate
acs AND gene AND expression AND drought AND stress AND plants AND pgpr	Scopus	Integrated analysis of transcriptomics and small RNA reveals that 1-MCP inhibits lignocellulosis of fresh common beans by regulating secondary cell wall metabolism	Xie et al., 2022		Rejected	Duplicate
acs AND gene AND expression AND drought AND stress AND plants AND pgpr	Scopus	The use of microbial inoculants for biological control, plant growth promotion, and sustainable agriculture: A review	Elnahal et al., 2022		Rejected	Duplicate
acs AND gene AND expression AND drought AND stress AND plants AND pgpr	Scopus	Delineation of molecular interactions of plant growth promoting bacteria induced β‑1,3‑glucanases and guanosine triphosphate ligand for antifungal response in rice: a molecular dynamics approach	Jha et al., 2022	Background The plant growth is influenced by multiple interactions with biotic (microbial) and abiotic components in their surroundings. These microbial interactions have both positive and negative effects on plant. Plant growth promoting bacterial (PGPR) interaction could result in positive growth under normal as well as in stress conditions. Methods Here, we have screened two PGPR’s and determi…	Rejected	Biotic stress
acs AND gene AND expression AND drought AND stress AND plants AND pgpr	Scopus	Genome Sequencing of Rahnella victoriana JZ-GX1 Provides New Insights Into Molecular and Genetic Mechanisms of Plant Growth Promotion.	Kong et al., 2022		Rejected	Duplicate
acs AND gene AND expression AND drought AND stress AND plants AND pgpr	Scopus	Plant Growth Promotion and Biocontrol by Endophytic and Rhizospheric Microorganisms From the Tropics: A Review and Perspectives.	Lacava et al., 2022		Rejected	Duplicate
acs AND gene AND expression AND drought AND stress AND plants AND pgpr	Scopus	Root Reinforcement Improved Performance, Productivity, and Grain Bioactive Quality of Field-Droughted Quinoa (Chenopodium quinoa).	Toubali et al., 2022	Modern agriculture is facing multiple and complex challenges and has to produce more food and fiber to feed a growing population. Increasingly volatile weather and more extreme events such as droughts can reduce crop productivity. This implies the need for significant increases in production and the adoption of more efficient and sustainable production methods and adaptation to climate change. A …	Rejected	Biotic stress
acs AND gene AND expression AND drought AND stress AND plants AND pgpr	Scopus	Bacillus amyloliquefaciens Rescues Glycyrrhizic Acid Loss Under Drought Stress in Glycyrrhiza uralensis by Activating the Jasmonic Acid Pathway.	Yue et al., 2021	Drought is a major factor limiting the production of the perennial medicinal plant Glycyrrhiza uralensis Fisch. (Fabaceae) in Northwest China. In this study, 1-year-old potted plants were inoculated with the strain Bacillus amyloliquefaciens FZB42, using a gradient of concentrations (CFU), to test for microbe-induced host tolerance to drought condition treatments in a greenhouse experiment. At th…	Rejected	No ACS
acs AND gene AND expression AND drought AND stress AND plants AND pgpr	Scopus	Cadmium Phytotoxicity, Tolerance, and Advanced Remediation Approaches in Agricultural Soils; A Comprehensive Review.	Zulfiqar et al., 2022		Rejected	Duplicate
acs AND gene AND expression AND drought AND stress AND plants AND pgpr	Scopus	Leveraging arsenic resistant plant growth-promoting rhizobacteria for arsenic abatement in crops	Kumar et al., 2022	Arsenic is a toxic metalloid categorized under class 1 carcinogen and is detrimental to both plants and animals. Agricultural land in several countries is contaminated with arsenic, resulting in its accumulation in food grains. Increasing global food demand has made it essential to explore neglected lands like arsenic-contaminated lands for crop production. This has posed a severe threat to both …	Rejected	Review
acs AND gene AND expression AND drought AND stress AND plants AND pgpr	Scopus	Salt Stress Tolerance-Promoting Proteins and Metabolites under Plant-Bacteria-Salt Stress Tripartite Interactions	Krishnamoorthy et al., 2022	The rapid increase in soil salinization has impacted agricultural output and poses a threat to food security. There is an urgent need to focus on improving soil fertility and agricultural yield, both of which are severely influenced by abiotic variables such as soil salinity and sodicity. Abiotic forces have rendered one-third of the overall land unproductive. Microbes are the primary answer to t…	Rejected	Review
acs AND gene AND expression AND drought AND stress AND plants AND pgpr	Scopus	Recent Advances in Bacterial Amelioration of Plant Drought and Salt Stress	Gamalero et al., 2022	The recent literature indicates that plant growth-promoting bacteria (PGPB) employ a range of mechanisms to augment a plant’s ability to ameliorate salt and drought stress. These mechanisms include synthesis of auxins, especially indoleacetic acid, which directly promotes plant growth; synthesis of antioxidant enzymes such as catalase, superoxide dismutase and peroxidase, which prevents the delet…	Rejected	Review
acs AND gene AND expression AND drought AND stress AND plants AND pgpr	Scopus	The Mechanisms of Sodium Chloride Stress Mitigation by Salt-Tolerant Plant Growth Promoting Rhizobacteria in Wheat	Huang et al., 2022	We investigated the growth-promoting mechanism of salt-tolerant plant growth promoting rhizobacteria (ST-PGPR) in wheat under sodium chloride (NaCl) stress by measuring the growth and physiological and biochemical responses of wheat plants inoculated with ST-PGPR under 0–400 mM NaCl. The results showed that ST-PGPR plays a significant role in the growth of wheat under NaCl stress. Under 300 mM Na…	Rejected	No ACS
acs AND gene AND expression AND drought AND stress AND plants AND pgpr	Scopus	Delineation of mechanistic approaches of rhizosphere microorganisms facilitated plant health and resilience under challenging conditions	Dukare et al., 2022	Sustainable agriculture demands the balanced use of inorganic, organic, and microbial biofertilizers for enhanced plant productivity and soil fertility. Plant growth-enhancing rhizospheric bacteria can be an excellent biotechnological tool to augment plant productivity in different agricultural setups. We present an overview of microbial mechanisms which directly or indirectly contribute to plant…	Rejected	Review
acs AND gene AND expression AND drought AND stress AND plants AND pgpr	Scopus	Unraveling the secrets of rhizobacteria signaling in rhizosphere	Singh et al., 2022		Rejected	Duplicate
acs AND gene AND expression AND drought AND stress AND plants AND pgpr	Scopus	Application of melatonin and PGPR alleviates thiamethoxam induced toxicity by regulating the TCA cycle in Brassica juncea L	Jan et al., 2022	Thiamethoxam, a broad spectrum, neonicotinoid insecticide, is used on various crops including Brassica juncea L. to protect from intruding insects such as leaf-hoppers, aphids, thrips and white-flies. Exposure to thiamethoxam causes acute malady such as tumour development, cell apoptosis, liver damage and neurotoxicity. Melatonin is entailed in umpteen developmental processes of plants, including…	Rejected	No abiotic stress
acs AND gene AND expression AND drought AND stress AND plants AND pgpr	Scopus	Efficacy of citric acid chelate and Bacillus sp. in amelioration of cadmium and chromium toxicity in wheat	Ilyas et al., 2022	Heavy metals contamination in agricultural soil is a major issue having drastic effects on plants and human health. To solve this issue, we have formulated and tested a new approach of fusion of inorganic (citric acid chelate) and organic (Bacillus sp.) amelioration methods for heavy metals. The Bacillus sp. was heavy metal tolerant and showed plant growth-promoting characteristics including phos…	Rejected	No ACS
acs AND gene AND expression AND drought AND stress AND plants AND pgpr	Scopus	Cadmium Toxicity in Plants: Recent Progress on Morpho‑physiological Effects and Remediation Strategies	Zulfiqar et al., 2022		Rejected	Duplicate
acs AND gene AND expression AND drought AND stress AND plants AND pgpr	Scopus	An Epigenetic Alphabet of Crop Adaptation to Climate Change	Guarino et al., 2022	Crop adaptation to climate change is in a part attributed to epigenetic mechanisms which are related to response to abiotic and biotic stresses. Although recent studies increased our knowledge on the nature of these mechanisms, epigenetics remains under- investigated and still poorly understood in many, especially non-model, plants, Epigenetic modifications are traditionally divided into two main…	Rejected	Review
acs AND gene AND expression AND drought AND stress AND plants AND pgpr	Scopus	Bioprospecting Plant Growth Promoting Rhizobacteria for Enhancing the Biological Properties and Phytochemical Composition of Medicinally Important Crops	Rizvi et al., 2022	Traditionally, medicinal plants have long been used as a natural therapy. Plant-derived extracts or phytochemicals have been exploited as food additives and for curing many health-related ailments. The secondary metabolites produced by many plants have become an integral part of human health and have strengthened the value of plant extracts as herbal medicines. To fulfil the demand of health care…	Rejected	Review
acs AND gene AND expression AND drought AND stress AND plants AND pgpr	Scopus	Foliar brassinosteroid analogue (DI-31) sprays increase drought tolerance by improving plant growth and photosynthetic efficiency in lulo plants	Casta~neda-Murillo et al., 2022	The use of agronomic alternatives such as plant hormone sprays has been considered a tool to mitigate drought stress. This research aimed to evaluate the use of foliar brassinosteroid analogue DI-31 (BRs) sprays on plant growth, leaf exchange and chlorophyll a fluorescence parameters, and biochemical variables in lulo (Solanum quitoense L. cv. septentrionale) seedlings grown under drought stress …	Rejected	No PGPR
acs AND gene AND expression AND drought AND stress AND plants AND pgpr	Scopus	Arbuscular Mycorrhizal Fungi Are an Influential Factor in Improving the Phytoremediation of Arsenic, Cadmium, Lead, and Chromium	Boorboori et al., 2022	The increasing expansion of mines, factories, and agricultural lands has caused many changes and pollution in soils and water of several parts of the world. In recent years, metal(loid)s are one of the most dangerous environmental pollutants, which directly and indirectly enters the food cycle of humans and animals, resulting in irreparable damage to their health and even causing their death. One…	Rejected	Review
acs AND gene AND expression AND drought AND stress AND plants AND pgpr	Scopus	Recent insights on gene expression studies on Hevea Brasiliensis fatal leaf fall diseases	Afandi et al., 2022	Hevea brasiliensis is one of the most important agricultural commodities globally, heavily cultivated in Southeast Asia. Fatal leaf fall diseases cause aggressive leaf defoliation, linked to lower latex yield and death of crops before maturity. Due to the significant consequences of the disease to H. brasiliensis, the recent gene expression studies from four fall leaf diseases of H. brasiliensis …	Rejected	Biotic stress
acs AND gene AND expression AND drought AND stress AND plants AND pgpr	Scopus	A Comprehensive Evaluation of Salt Tolerance in Tomato (Var. Ailsa Craig): Responses of Physiological and Transcriptional Changes in RBOH’s and ABA Biosynthesis and Signalling Genes	Raziq et al., 2022.	Salinity is a ubiquitous stressor, depleting osmotic potential and affecting the tomato seedlings’ development and productivity. Considering this critical concern, we explored the salinity response in tomato seedlings by evaluating them under progressive salt stress duration (0, 3, 6, and 12 days). Intriguingly, besides the adverse effect of salt stress on tomato growth the findings exhibited a s…	Rejected	No PGPR
acs AND gene AND expression AND drought AND stress AND plants AND pgpr	Scopus	Agronomic Practices to Increase the Yield and Quality of Common Bean (Phaseolus vulgaris L.): A Systematic Review	Karavidas et al., 2022	Common bean (Phaseolus vulgaris L.) is the most important legume for human consumption worldwide and an important source of vegetable protein, minerals, antioxidants, and bioactive compounds. The N2-fixation capacity of this crop reduces its demand for synthetic N fertilizer application to increase yield and quality. Fertilization, yield, and quality of common bean may be optimised by several oth…	Rejected	Review
acs AND gene AND expression AND drought AND stress AND plants AND pgpr	Scopus	Unravelling the multi‑faceted regulatory role of polyamines in plant biotechnology, transgenics and secondary metabolomics	Nandy et al., 2022	Polyamines (PAs) are ubiquitous low-molecular-weight, aliphatic compounds with wide as well as complex application in fundamental areas of plant growth and development. PAs are mediator of basic metabolism of organisms which include cell division and differentiation, biotic and abiotic stress tolerance, reversal of oxidative damage, stabilization of nucleic acids, and protein and phospholipid bin…	Rejected	Review
acs AND gene AND expression AND drought AND stress AND plants AND pgpr	Scopus	Elaboration of a Phytoremediation Strategy for Successful and Sustainable Rehabilitation of Disturbed and Degraded Land	Sekhohola-Dlamini et al., 2022	Humans are dependent upon soil which supplies food, fuel, chemicals, medicine, sequesters pollutants, purifies and conveys water, and supports the built environment. In short, we need soil, but it has little or no need of us. Agriculture, mining, urbanization and other human activities result in temporary land-use and once complete, used and degraded land should be rehabilitated and restored to m…	Rejected	review
acs AND gene AND expression AND drought AND stress AND plants AND pgpr	Scopus	Role and significance of biofilm-forming microbes in phytoremediation -A review	Sharma, 2022		Rejected	Duplicate
acs AND gene AND expression AND drought AND stress AND plants AND pgpr	Scopus	Actinobacteria-enhanced plant growth, nutrient acquisition, and crop protection: Advances in soil, plant, and microbial multifactorial interactions	Mitra et al., 2020	Agricultural areas of land are deteriorating every day owing to population increase, rapid urbanization, and industrialization. To feed today’s huge populations, increased crop production is required from smaller areas, which warrants the continuous application of high doses of inorganic fertilizers to agricultural land. These cause damage to soil health and, therefore, nutrient imbalance conditi…	Rejected	review
acs AND gene AND expression AND drought AND stress AND plants AND pgpr	Scopus	Effects of plant growth-promoting rhizobacteria on the molecular responses of maize under drought and heat stresses: A review	NOTUNUNU et al., 2022		Rejected	Duplicate
acs AND gene AND expression AND drought AND stress AND plants AND pgpr	Scopus	Bacillus sp. WR12 alleviates iron deficiency in wheat via enhancing siderophore- and phenol-mediated iron acquisition in roots	Yue et al., 2022	Purpose Iron (Fe) deficiency seriously affects crop growth and yield. This study investigated whether and how an endophytic isolate, strain Bacillus sp. WR12, alleviates Fe deficiency in wheat (Triticum aestivum L.). Methods Bacillus sp. WR12 and wheat seedlings were hydroponically co-cultured for 2 weeks under Fe-deficient conditions. To evaluate the Fe deficiency alleviating potential, wheat gr…	Rejected	No ACS
acs AND gene AND expression AND drought AND stress AND plants AND pgpr	Scopus	Bacillus sp. WR12 alleviates iron deficiency in wheat via enhancing siderophore- and phenol-mediated iron acquisition in roots	Onwe et al., 2022		Rejected	Duplicate
acs AND gene AND expression AND drought AND stress AND plants AND pgpr	Scopus	Utilizing the underutilized plant resources for development of life style foods: Putting nutrigenomics to use	Mir et al., 2022	Sufficient amount of minerals, vitamins, and proteins in human diet play indispensable role in maintaining the active metabolism for better human health. All the essential nutrients that are requisite for an individual’s survival are acquired from plants as well as animals. Micronutrients and macronutrients directly influence the metabolic pathways and their deficiencies play a substantial role i…	Rejected	review
acs AND gene AND expression AND drought AND stress AND plants AND pgpr	Scopus	Exploiting Beneficial Pseudomonas spp. for Cannabis Production.	Balthazar et al., 2022	Among the oldest domesticated crops, cannabis plants (Cannabis sativa L., marijuana and hemp) have been used to produce food, fiber, and drugs for thousands of years. With the ongoing legalization of cannabis in several jurisdictions worldwide, a new high-value market is emerging for the supply of marijuana and hemp products. This creates unprecedented challenges to achieve better yields and envi…	Rejected	Review
acs AND gene AND expression AND drought AND stress AND plants AND pgpr	Scopus	Significance of the Diversification of Wheat Species for the Assembly and Functioning of the Root-Associated Microbiome	Gruet et al., 2022	Wheat, one of the major crops in the world, has had a complex history that includes genomic hybridizations between Triticum and Aegilops species and several domestication events, which resulted in various wild and domesticated species (especially Triticum aestivum and Triticum durum), many of them still existing today. The large body of information available on wheat-microbe interactions, however…	Rejected	review
acs AND gene AND expression AND drought AND stress AND plants AND pgpr	Scopus	EFFECTS OF RHIZOBACTERIA AND ALGAL SPECIES ON PHYSIOLOGICAL AND BIOCHEMICAL PARAMETERS IN CALENDULA OFFICINALIS L. UNDER DIFFERENT IRRIGATION REGIMES	Selem et al., 2021	Drought is one of the main limiting factors affecting the growth and productivity of plants. Drought stress affects plant growth in different ways through a series of anatomical, morphological, physiological and biochemical changes. Therefore, it is important to develop alternative methods to protect plants against drought stress. Turkey has one the most unique cultivated areas of different medic…	Rejected	No ACS
acs AND gene AND expression AND drought AND stress AND plants AND pgpr	Scopus	Characterization of biochar derived from bamboo and its application to modulate the toxic effects of chromium on wheat plant	Deng et al., 2022	Soil pollution with heavy metals has become a global issue that can be addressed via immobilization through the application of biochar. In the present study, we hypothesized that biochar derived from bamboo helps mitigate the toxicity of chromium (Cr) in wheat plants grown in soil contaminated with Cr at 0, 50, 100, and 200 mg kg −1 . The biochar produced was brittle, porous, and alkaline with a …	Rejected	No stress abiotico
acs AND gene AND expression AND drought AND stress AND plants AND pgpr	Scopus	Plant Secondary Metabolites as a Tool to Investigate Biotic Stress Tolerance in Plants: A Review	Jha et al., 2022	Plants have a large diversity of metabolites in order to carry out the complicated plant metabolic pathway in a coordinated manner under normal as well as stressful conditions. These metabolites are further subdivided into primary metabolites which are responsible the for main metabolic pathways that are critical for the survival of plants and secondary metabolites which are not necessary for the…	Rejected	review
acs AND gene AND expression AND drought AND stress AND plants AND pgpr	Scopus	Metabolites of zearalenone and phytohormones secreted by endophytic fungus strain TH15 regulating the root development in Tetrastigma hemsleyanum	Wang et al., 2022	Tetrastigma hemsleyanum is a traditional Chinese herb plant. The endophytic fungus strain TH15 isolated from root of T. hemsleyanum has been reported to significantly promote the growth of T. hemsleyanum. In this study, we combined HPLC–MS and ELISA to analyze the composition of TH15’s fermentation broth. We also explored the effects of zearalenone, a metabolite of strain TH15, on the growth of T…	Rejected	Fungi
acs AND gene AND expression AND drought AND stress AND plants AND pgpr	Scopus	Iron bio-fortification and heavy metal/(loid)s contamination in cereals: successes, issues, and challenges	Sohail et al., 2021	Biofortification of micronutrients, particularly of the iron (Fe) in cereals, is a viable, attractive, and sustainable strategy to cope with malnutrition as cereals are the major staple diets, particularly in developing countries. Increased concentrations of heavy metal/(loid)s (HMs); i.e. cadmium (Cd), lead (Pb), arsenic (As) etc. in agricultural soils is an increasing and serious challenge, pos…	Rejected	Review
acs AND gene AND expression AND drought AND stress AND plants AND pgpr	Scopus	Comparative study of the pharmacological, phytochemical and biotechnological aspects of Tribulus terrestris Linn. and Pedalium murex Linn: An overview	Tyagi et al., 2022	Treatment and management of various diseases are cured by use of herbal remedies, which are worked in the numerous medicinal systems. In which, Tribulus terrestris L. and Pedalium murex L. are the most important me- dicinal herbs, which are commonly used in Ayurvedic medicinal treatment. T. terrestris and P. murex have been categorized as numerous types of chemical compounds such as steroidal sap…	Rejected	Article in press
acs AND gene AND expression AND drought AND stress AND plants AND pgpr	Scopus	A Comparative Analysis of Heavy Metal Effects on Medicinal Plants	Mukherjee et al. 2022	Popularity of herbal drugs has always been in high demand, but recently it has been increasing all over the world, especially in India, because of the lower range of adverse health effects as compared to synthetic or man-made drugs. Not only this but their cost-effectiveness and easy availability to the poor people and the masses, particularly in developing countries, are major causes for their d…	Rejected	Review
acs AND gene AND expression AND drought AND stress AND plants AND pgpr	Scopus	Trehalose induced drought tolerance in plants: physiological and molecular responses	Shao et al., 2022	Drought stress is significant abiotic stress that limits crop growth and productivity across the globe. The intensity of drought stress continuously rises due to rapid climate change. Drought-induced alterations in physiological and bio-chemical processes by generating membrane dis-stability, oxidative stress, nutritional imbalance and leading to substantial reduction in growth and productivity. …	Rejected	Review
acs AND gene AND expression AND drought AND stress AND plants AND pgpr	Scopus	Molecular Insights into the Role of Reactive Oxygen, Nitrogen and Sulphur Species in Conferring Salinity Stress Tolerance in Plants	Mangal et al., 2022		Rejected	Duplicate
acs AND gene AND expression AND drought AND stress AND plants AND pgpr	Scopus	Microorganism rhizosphere interactions and their impact on the bioremediation of saline soils: a review	Delgado‑González et al., 2022	The salinization process in agricultural soils is extensive and has a negative impact on ecosystems and economic activities. The effects and causes of salinity are multifactorial, which must be evaluated to value and propose alternatives for sustained and environmentally friendly recovery. This paper seeks to integrate updated and reliable information on biological research and evaluation methods…	Rejected	review
acs AND gene AND expression AND drought AND stress AND plants AND pgpr	Scopus	Mitigation of Commercial Food Waste-Related Salinity Stress Using Halotolerant Rhizobacteria in Chinese Cabbage Plants	Khan et al., 2022	The use of commercial food waste in the Korean agricultural industry is increasing due to its capacity to act as an ecofriendly fertilizer. However, the high salt content of food waste can be detrimental to plant health and increase salinity levels in agricultural fields. In the current study, we introduced halotolerant rhizobacteria to neutralize the negative impact of food waste-related salt st…	Rejected	No PGPR
acs AND gene AND expression AND drought AND stress AND plants AND pgpr	Scopus	Effect of plant growth regulators and salt stress on secondary metabolite composition in Lamiaceae species	Assaf et al., 2021	Medicinal and aromatic plants (MAPs) are a natural resource for secondary metabolite compounds that are used in the pharmaceutical, cosmetic and food industries due totheir therapeutic properties, nutritional and flavor values or as main natural inputs to the perfumery andchemical industries. The Lamiaceae (mint) family contains many plant species rich in essential oils comprising terpenoid and p…	Rejected	review
acs AND gene AND expression AND drought AND stress AND plants AND pgpr	Scopus	Differential Physio-Biochemical and Metabolic Responses of Peanut (Arachis hypogaea L.) under Multiple Abiotic Stress Conditions	Patel et al., 2022		Rejected	Duplicate
acs AND gene AND expression AND drought AND stress AND plants AND pgpr	Scopus	Biostimulants in Viticulture: A Sustainable Approach against Biotic and Abiotic Stresses	Cataldo et al., 2022	Climate change and disproportionate anthropogenic interventions, such as the excess of phytopharmaceutical products and continuous soil tillage, are jeopardizing viticulture by subjecting plants to continuous abiotic stress. One of the main physiological repercussions of abiotic stress is represented by the unbalanced redox homeostasis due to the overproduction of reactive oxygen species (ROS), u…	Rejected	review
acs AND gene AND expression AND drought AND stress AND plants AND pgpr	Scopus	Harnessing Synergistic Biostimulatory Processes: A Plausible Approach for Enhanced Crop Growth and Resilience in Organic Farming	Sani et al., 2021	Demand for organically grown food crops is rising substantially annually owing to their contributions to human health. However, organic farm production is still generally lower compared to conventional farming. Nutrient availability, content consistency, uptake, assimilation, and crop responses to various stresses were reported as critical yield-limiting factors in many organic farming systems. I…	Rejected	review
acs AND gene AND expression AND drought AND stress AND plants AND pgpr	Scopus	Biofertilizers: An ecofriendly technology for nutrient recycling and environmental sustainability	Kumar et al., 2022	Modern intensive agricultural practices face numerous challenges that pose major threats to global food security. In order to address the nutritional requirements of the ever-increasing world population, chemical fertilizers and pesticides are applied on large scale to increase crop production. However, the injudicious use of agrochemicals has resulted in environmental pollution leading to public…	Rejected	review
acs AND gene AND expression AND drought AND stress AND plants AND pgpr	Scopus	Performance of halotolerant bacteria associated with Sahara‑inhabiting halophytes Atriplex halimus L. and Lygeum spartum L. ameliorate tomato plant growth and tolerance to saline stress: from selective isolation to genomic analysis of potential determinants	Dif et al., 2022	The use of halotolerant beneficial plant-growth-promoting (PGP) bacteria is considered as a promising eco-friendly approach to improve the salt tolerance of cash crops. One strategy to enhance the possibility of obtaining stress-alleviating bacteria is to screen salt impacted soils. In this study, amongst the 40 endophytic bacteria isolated from the roots of Sahara-inhabiting halophytes Atriplex …	Rejected	No ACS
acs AND gene AND expression AND drought AND stress AND plants AND pgpr	Scopus	Titanium dioxide nanoparticles mitigate cadmium toxicity in Coriandrum sativum L. through modulating antioxidant system, stress markers and reducing cadmium uptake	Sardar et al., 2022	Anthropogenic activities are the foremost reason of metal pollution in soils of the cultivated areas, resulting abnormal physiochemical processes in plants. Among metals contaminants, cadmium (Cd) is one of the most injurious contaminants that deleteriously affect physiological activities, growth and yield of the crop plants. Keeping in view the stress mitigation potential of titanium dioxide (Ti…	Rejected	No PGPR
acs AND gene AND expression AND drought AND stress AND plants AND pgpr	Scopus	Soil carbon supplementation: Improvement of root-surrounding soil bacterial communities, sugar and starch content in tobacco (N. tabacum)	Yan et al., 2022	Soil carbon supplementation is known to stimulate plant growth by improving soil fertility and plant nutrient up- take. However, the underlying process and chemical mechanism that could explain the interrelationship between soil carbon supplementation, soil micro-ecology, and the growth and quality of plant remain unclear. In this study, we investigated the influence and mechanism of soil carbon …	Rejected	No ACS
acs AND gene AND expression AND drought AND stress AND plants AND pgpr	Scopus	Climate change regulated abiotic stress mechanisms in plants: a comprehensive review	Chaudhry et al., 2022	Global climate change is identified as a major threat to survival of natural ecosystems. Climate change is a dynamic, multi- faceted system of alterations in environmental conditions that affect abiotic and biotic components of the world. It results in alteration in environmental conditions such as heat waves, intensity of rainfall, CO2 concentration and temperature that lead to rise in new pests…	Rejected	review
acs AND gene AND expression AND drought AND stress AND plants AND pgpr	Scopus	The Bacterial Microbiome of the Tomato Fruit Is Highly Dependent on the Cultivation Approach and Correlates With Flavor Chemistry.	Escobar Rodríguez et al., 2022	The modes of interactions between plants and plant-associated microbiota are manifold, and secondary metabolites often play a central role in plant-microbe interactions. Abiotic and biotic (including both plant pathogens and endophytes) stress can affect the composition and concentration of secondary plant metabolites, and thus have an influence on chemical compounds that make up for the taste an…	Rejected	No PGPR
acs AND gene AND expression AND drought AND stress AND plants AND pgpr	Scopus	Recent Developments in Microbe–Plant-Based Bioremediation for Tackling Heavy Metal-Polluted Soils	Saha et al., 2022	Soil contamination with heavy metals (HMs) is a serious concern for the developing world due to its non-biodegradability and significant potential to damage the ecosystem and associated services. Rapid industrialization and activities such as mining, manufacturing, and construction are generating a huge quantity of toxic waste which causes environmental hazards. There are various traditional phys…	Rejected	review
acs AND gene AND expression AND drought AND stress AND plants AND pgpr	Scopus	Bioaccumulation and Tolerance Indices of Cadmium in Wheat Plants Grown in Cadmium-Spiked Soil: Health Risk Assessment.	Halim et al., 2021	Farmers use wastewater for irrigation in many developing countries, for example Bangladesh, India, China, Sri Lanka and Vietnam because they have limited access to clean water. This study explored cadmium (Cd) bioaccumulation in two spring wheat cultivars (cv. Mustang and Lancer), which were grown in different concentrations of Cd (0,1, 2, 4, and 8 mg kg−1) in agricultural soils. The half maximum…	Rejected	No PGPR
acs AND gene AND expression AND drought AND stress AND plants AND pgpr	Scopus	Actinobacteria From Desert: Diversity and Biotechnological Applications.	Xie et al., 2021	Deserts, as an unexplored extreme ecosystem, are known to harbor diverse actinobacteria with biotechnological potential. Both multidrug-resistant (MDR) pathogens and environmental issues have sharply raised the emerging demand for functional actinobacteria. From 2000 to 2021, 129 new species have been continuously reported from 35 deserts worldwide. The two largest numbers are of the members of t…	Rejected	review
acs AND gene AND expression AND drought AND stress AND plants AND pgpr	Scopus	Enhancement of drought tolerance in diverse Vicia faba cultivars by inoculation with plant growth‑promoting rhizobacteria under newly reclaimed soil conditions	Mansour et al., 2021	Water deficit has devastating impacts on legume production, particularly with the current abrupt climate changes in arid environments. The application of plant growth‑promoting rhizobacteria (PGPR) is an effective approach for producing natural nitrogen and attenuating the detrimental effects of drought stress. This study investigated the influence of inoculation with the PGPR Rhizobium leguminos…	Rejected	No ACS
acs AND gene AND expression AND drought AND stress AND plants AND pgpr	Scopus	Phytonanotechnology applications in modern agriculture	Jiang et al., 2021	With the rapidly changing global climate, the agricultural systems are confronted with more unpredictable and harsh environmental conditions than before which lead to compromised food production. Thus, to ensure safer and sustainable crop production, the use of advanced nanotechnological approaches in plants (phytonanotechnology) is of great significance. In this review, we summarize recent advan…	Rejected	review
acs AND gene AND expression AND drought AND stress AND plants AND pgpr	Scopus	Cold acclimation and prospects for cold-resilient crops	Juurakko et al., 2021	Low-temperatures pose extreme challenges to crops causing significant economical impacts. Frosts are responsible for more than 30% of weather-related insured crop losses in some temperate climate jurisdictions, but are particularly devastating for small holdings and communities reliant on a bountiful harvest. Low-temperatures are also frequently accompanied by other abiotic and biotic stresses, i…	Rejected	review
acs AND gene AND expression AND drought AND stress AND plants AND pgpr	Scopus	Genetic, Epigenetic, Genomic and Microbial Approaches to Enhance Salt Tolerance of Plants: A Comprehensive Review	Saradadevi et al., 2021	Globally, soil salinity has been on the rise owing to various factors that are both human and environmental. The abiotic stress caused by soil salinity has become one of the most damaging abiotic stresses faced by crop plants, resulting in significant yield losses. Salt stress induces physiological and morphological modifications in plants as a result of significant changes in gene expression pat…	Rejected	review
acs AND gene AND expression AND drought AND stress AND plants AND pgpr	Scopus	Elucidating the Molecular Mechanisms by which Seed-Borne Endophytic Fungi, Epichloë gansuensis, Increases the Tolerance of Achnatherum inebrians to NaCl Stress	Cheng et al., 2021	Seed-borne endophyte Epichloë gansuensis enhance NaCl tolerance in Achnatherum inebrians and increase its biomass. However, the molecular mechanism by which E. gansuensis increases the tolerance of host grasses to NaCl stress is unclear. Hence, we firstly explored the full-length transcriptome information of A. inebrians by PacBio RS II. In this work, we obtained 738,588 full-length non-chimeric …	Rejected	Biotic stress
acs AND gene AND expression AND drought AND stress AND plants AND pgpr	Scopus	Reducing Drought Stress in Plants by Encapsulating Plant Growth-Promoting Bacteria with Polysaccharides	Riseh et al., 2021	Drought is a major abiotic stress imposed by climate change that affects crop production and soil microbial functions. Plants respond to water deficits at the morphological, biochemical, and physiological levels, and invoke different adaptation mechanisms to tolerate drought stress. Plant growth-promoting bacteria (PGPB) can help to alleviate drought stress in plants through various strategies, i…	Rejected	review
acs AND gene AND expression AND drought AND stress AND plants AND pgpr	Scopus	Plant growth-promoting root-colonizing bacterial endophytes	Adeleke et al., 2021		Rejected	Duplicate
acs AND gene AND expression AND drought AND stress AND plants AND pgpr	Scopus	Phytohormones Producing Acinetobacter bouvetii P1 Mitigates Chromate Stress in Sunflower by Provoking Host Antioxidant Response	Qadir et al., 2021	Different physical and chemical techniques are used for the decontamination of Cr+6 contaminated sites. The techniques are expensive, laborious, and time-consuming. However, remediation of Cr+6 by microbes is viable, efficient, and cost-effective. In this context, plant growth-promoting rhizobacteria Acinetobacter bouvetii P1 isolated from the industrial zone was tested for its role in relieving …	Rejected	No ACS
acs AND gene AND expression AND drought AND stress AND plants AND pgpr	Scopus	Application of CRISPR–Cas9 in plant–plant growth‑promoting rhizobacteria interactions for next Green Revolution	Singh et al., 2021		Rejected	Duplicate
acs AND gene AND expression AND drought AND stress AND plants AND pgpr	Scopus	Recent trend in nanoparticle research in regulating arsenic bioaccumulation and mitigating arsenic toxicity in plant species	Samanta et al., 2021	Atmospheric contamination by heavy metals/metalloids is a widespread global issue. Industrial discharges, along with agricultural and anthropogenic activities cause massive accumulation of arsenic (As) in soil and groundwater, which collectively results in increased toxicity of this metalloid in crop plants. Arsenic causes phytotoxicity by interfering with plant metabolic processes at physiologic…	Rejected	review
acs AND gene AND expression AND drought AND stress AND plants AND pgpr	Scopus	Silicon improves physiological, biochemical, and morphological adaptations of alfalfa (Medicago sativa L.) during salinity stress	El Moukhtari et al., 2021	Silicon (Si) application to crops is a promising way for the deployment of sustainable agriculture. Here, the effects of Si on salt stress tolerance were investigated in alfalfa (Medicago sativa L.)-rhizobia symbioses. Two Moroccan, Ouad-Lmaleh (OL) and Demnate-201 (Dm), and one European, NS-Mediana-ZMS-V (NS-Med), alfalfa varieties were associated to Ensifer meliloti Rm41 rhizobial strain. One-m…	Rejected	No ACS
acs AND gene AND expression AND drought AND stress AND plants AND pgpr	Scopus	Plant-cyanobacteria interactions: Beneficial and harmful effects of cyanobacterial bioactive compounds on soil-plant systems and subsequent risk to animal and human health	Nowruzi et al., 2021	Plant-cyanobacteria interactions occur in different ways and at many different levels, both beneficial and harmful. Plant-cyanobacteria interactions, as a beneficial symbiosis, have long been demonstrated in rice-growing areas (Poaceae) where the most efficient nitrogen-fixing cyanobacteria are present in paddies. Moreover, cyanobacteria may in turn produce and/or secrete numerous bioactive compo…	Rejected	review
acs AND gene AND expression AND drought AND stress AND plants AND pgpr	Scopus	Melatonin enhances the resistance of ginger rhizomes to postharvest fungal decay	Huang et al., 2021	Significant losses in harvested ginger can be directly attributed to decay fungi, including Fusarium oxysporum and Penicillium brevicompactum. Eco-friendly treatments, utilizing non-conventional chemical methods to manage postharvest decay on ginger rhizome are being actively investigated. In the current study, the application of melatonin (N-acetyl-5-methoxytryptamine) was evaluated for controll…	Rejected	Biotic stress
acs AND gene AND expression AND drought AND stress AND plants AND pgpr	Scopus	Bio-prospecting of ACC deaminase producing Rhizobacteria towards sustainable agriculture: A special emphasis on abiotic stress in plants	Murali et al., 2021		Rejected	Duplicate
acs AND gene AND expression AND drought AND stress AND plants AND pgpr	Scopus	Safe, efficient, and economically beneficial remediation of arsenic-contaminated soil: possible strategies for increasing arsenic tolerance and accumulation in non-edible economically important native plants	Singh et al., 2021	Anthropogenic activities, geological processes, and biogenic sources have led to the enhanced concentration of arsenic (As), a toxic metalloid in water and soil. Non-edible, economically important plants can be employed for safe As phytoremediation in addition to generating extra income. However, these plants may get affected by stressful local environmental conditions. Native plant species are a…	Rejected	review
acs AND gene AND expression AND drought AND stress AND plants AND pgpr	Scopus	Streptomyces Strains Promote Plant Growth and Induce Resistance Against Fusarium verticillioides via Transient Regulation of Auxin Signaling and Archetypal Defense Pathways in Maize Plants.	Tran et al., 2021	Driven by climate change, Fusarium ear rot (FER) caused by Fusarium verticillioides occurs frequently in maize worldwide. In parallel, legislative regulations and increasing environmental awareness have spurred research on alternative FER biocontrol strategies. A promising group of bacterial control agents is Streptomyces species due to their metabolic versatility. However, insights into the mole…	Rejected	Biotic stress
acs AND gene AND expression AND drought AND stress AND plants AND pgpr	Scopus	Differential Protein Expression Analysis of Two Sugarcane Varieties in Response to Diazotrophic Plant Growth-Promoting Endophyte Enterobacter roggenkampii ED5.	Guo et al., 2021	Plant endophytic bacteria have many vital roles in plant growth promotion (PGP), such as nitrogen (N) fixation and resistance to biotic and abiotic stresses. In this study, the seedlings of sugarcane varieties B8 (requires a low concentration of nitrogen for growth) and GT11 (requires a high concentration of nitrogen for growth) were inoculated with endophytic diazotroph Enterobacter roggenkampii…	Rejected	No abiotic stress
acs AND gene AND expression AND drought AND stress AND plants AND pgpr	Scopus	Prospects for Abiotic Stress Tolerance in Crops Utilizing Phyto- and Bio-Stimulants.	Rai et al., 2021	Environmental stressors such as salinity, drought, high temperature, high rainfall, etc. have already demonstrated the negative impacts on plant growth and development and thereby limiting productivity of the crops. Therefore, in the time to come, more sustainable efforts are required in agricultural practices to ensure food production and security under such adverse environmental conditions. A m…	Rejected	review
acs AND gene AND expression AND drought AND stress AND plants AND pgpr	Scopus	Plant Growth-Promoting Rhizobacteria Modulate the Concentration of Bioactive Compounds in Tomato Fruits	de la Osa et al., 2021	The application of microorganisms as bioestimulants in order to increase the yield and/or quality of agricultural products is becoming a widely used practice in many countries. In this work, five plant growth-promoting rhizobacteria (PGPR), isolated from cultivated rice paddy soils, were selected for their plant growth-promoting capacities (e.g., auxin synthesis, chitinase activity, phosphate sol…	Rejected	No abiotic stress
acs AND gene AND expression AND drought AND stress AND plants AND pgpr	Scopus	Genotoxic Evaluation of Fe3O4 Nanoparticles in Different Three Barley (Hordeum vulgare L.) Genotypes to Explore the Stress-Resistant Molecules	Kokina et al., 2021	Sustainable agricultural practices are still essential due to soil degradation and crop losses. Recently, the relationship between plants and nanoparticles (NPs) attracted scientists’ attention, especially for applications in agricultural production as nanonutrition. Therefore, the present research was carried out to investigate the effect of Fe3O4 NPs at low concentrations (0, 1, 10, and 20 mg/L…	Rejected	No PGPR
acs AND gene AND expression AND drought AND stress AND plants AND pgpr	Scopus	Salinity Stress: Toward Sustainable Plant Strategies and Using Plant Growth-Promoting Rhizobacteria Encapsulation for Reducing It	Riseh et al., 2021	Salinity is one of the most important abiotic stresses that influences plant growth and productivity worldwide. Salinity affects plant growth by ionic toxicity, osmotic stress, hormonal imbalance, nutrient mobilization reduction, and reactive oxygen species (ROS). To survive in saline soils, plants have developed various physiological and biochemical strategies such as ion exchange, activation of…	Rejected	review
acs AND gene AND expression AND drought AND stress AND plants AND pgpr	Scopus	Bacterial Endophyte Community Dynamics in Apple (Malus domestica Borkh.) Germplasm and Their Evaluation for Scab Management Strategies	Padder et al., 2021	The large genetic evolution due to the sexual reproduction-mediated gene assortments and propensities has made Venturia inaequalis (causing apple scab) unique with respect to its management strategies. The resistance in apple germplasm against the scab, being controlled for by more than fifteen genes, has limited gene alteration-based investigations. Therefore, a biological approach of bacterial …	Rejected	Biotic stress
acs AND gene AND expression AND drought AND stress AND plants AND pgpr	Scopus	Plant-Growth-Promoting Rhizobacteria Emerging as an Effective Bioinoculant to Improve the Growth, Production, and Stress Tolerance of Vegetable Crops	Kumar et al., 2021	Vegetable cultivation is a promising economic activity, and vegetable consumption is important for human health due to the high nutritional content of vegetables. Vegetables are rich in vitamins, minerals, dietary fiber, and several phytochemical compounds. However, the production of vegetables is insufficient to meet the demand of the ever-increasing population. Plant-growth-promoting rhizobacte…	Rejected	Review
acs AND gene AND expression AND drought AND stress AND plants AND pgpr	Scopus	Drought Tolerant Enterobacter sp./Leclercia adecarboxylata Secretes Indole-3-acetic Acid and Other Biomolecules and Enhances the Biological Attributes of Vigna radiata (L.) R. Wilczek in Water Deficit Conditions	Ahmed et al., 2021		Rejected	Duplicate
acs AND gene AND expression AND drought AND stress AND plants AND pgpr	Scopus	Novel Genetic Dysregulations and Oxidative Damage in Fusarium graminearum Induced by Plant Defense Eliciting Psychrophilic Bacillus atrophaeus TS1	Zubair et al., 2021	This study elaborates inter-kingdom signaling mechanisms, presenting a sustainable and eco-friendly approach to combat biotic as well as abiotic stress in wheat. Fusarium graminearum is a devastating pathogen causing head and seedling blight in wheat, leading to huge yield and economic losses. Psychrophilic Bacillus atrophaeus strain TS1 was found as a potential biocontrol agent for suppression o…	Rejected	Biotic stress
acs AND gene AND expression AND drought AND stress AND plants AND pgpr	Scopus	Plants Saline Environment in Perception with Rhizosphere Bacteria Containing 1-Aminocyclopropane-1-Carboxylate Deaminase	Bomle et al., 2021		Rejected	Duplicate
acs AND gene AND expression AND drought AND stress AND plants AND pgpr	Scopus	Gene expression and metabolite analysis in barley inoculated with net blotch fungus and plant growth-promoting rhizobacteria	Backes et al., 2021	Net blotch, caused by the ascomycete Drechslera teres, can compromise barley production. Beneficial bacteria strains are of substantial interest as biological agents for plant protection in agriculture. Belonging to the genus Paraburkholderia, a bacterium, referred to as strain B25, has been identified as protective for barley against net blotch. The strain Paraburkholderia phytofirmans (strain P…	Rejected	No abiotic stress
acs AND gene AND expression AND drought AND stress AND plants AND pgpr	Scopus	Natural Biostimulant Attenuates Salinity Stress Effects in Chili Pepper by Remodeling Antioxidant, Ion, and Phytohormone Balances, and Augments Gene Expression	Abou-Sreea et al., 2021	A biostimulant is any microorganism or substance used to enhance the efficiency of nutrition, tolerance to abiotic stress and/or quality traits of crops, depending on its contents from nutrients. Plant biostimulants like honey bee (HB) and silymarin (Sm) are a strategic trend for managing stressed crops by promoting nutritional and hormonal balance, regulating osmotic protectors, antioxidants, an…	Rejected	No ACS
acs AND gene AND expression AND drought AND stress AND plants AND pgpr	Scopus	The Dynamism of Transposon Methylation for Plant Development and Stress Adaptation	Ramakrishnan et al., 2021	Plant development processes are regulated by epigenetic alterations that shape nuclear structure, gene expression, and phenotypic plasticity; these alterations can provide the plant with protection from environmental stresses. During plant growth and development, these processes play a significant role in regulating gene expression to remodel chromatin structure. These epigenetic alterations are …	Rejected	review
acs AND gene AND expression AND drought AND stress AND plants AND pgpr	Scopus	Azospirillum brasilense Az39 restricts cadmium entrance into wheat plants and mitigates cadmium stress	Vazquez et al., 2021	In this work, we tested if inoculation with the plant growth-promoting rhizobacteria Azospirillum brasilense strain Az39 alleviates Cd2+ stress in wheat seedlings grown under controlled conditions. Growth, total N, N-related metabolites/enzymes, and oxidative stress parameters were measured. Additionally, the usefulness of a real-time PCR protocol to screen the preferred colonization site of the …	Rejected	No ACS
acs AND gene AND expression AND drought AND stress AND plants AND pgpr	Scopus	Critical review on microbial community during in-situ bioremediation of heavy metals from industrial wastewater	Sharma et al., 2021	This review aims to summarise recent studies on in-situ microbial remediation of heavy metals from industrial wastewater. The major environmental issue of heavy metal(s) pollution in groundwater is worldwide due to the continuous development of industrial activities. Microbial remediation has been reported to show intense changes in the microbial diversity induced by heavy metals, environmental p…	Rejected	review
acs AND gene AND expression AND drought AND stress AND plants AND pgpr	Scopus	Arsenic acquisition, toxicity and tolerance in plants - From physiology to remediation: A review	Bali et al., 2021	Globally, environmental contamination by potentially noxious metalloids like arsenic is becoming a critical concern to the living organisms. Arsenic is a non-essential metalloid for plants and can be acclimatised in plants to toxic levels. Arsenic acquisition by plants poses serious health risks in human due to its entry in the food chain. High arsenic regimes disturb plant water relations, promo…	Rejected	review
acs AND gene AND expression AND drought AND stress AND plants AND pgpr	Scopus	Approaches for the amelioration of adverse effects of drought stress on crop plants	Dubey et al., 2021		Rejected	Duplicate
acs AND gene AND expression AND drought AND stress AND plants AND pgpr	Scopus	Humic Substances in Combination With Plant Growth-Promoting Bacteria as an Alternative for Sustainable Agriculture	da Silva et al., 2021	Plant growth-promoting bacteria (PGPB) and humic substances (HSs) are promising options for reducing the use of pesticides and mineral fertilizers. Although many studies have shown the effects of PGPB and HSs separately, little information is available on plant responses to the combined application of these biostimulants despite the great potential for the simultaneous action of these biological …	Rejected	review
acs AND gene AND expression AND drought AND stress AND plants AND pgpr	Scopus	Constraints and Prospects of Improving Cowpea Productivity to Ensure Food, Nutritional Security and Environmental Sustainability.	Omomowo et al., 2021	Providing safe and secure food for an increasing number of people globally is challenging. Coping with such a human population by merely applying the conventional agricultural production system has not proved to be agro-ecologically friendly; nor is it sustainable. Cowpea (Vigna unguiculata (L) Walp) is a multi-purpose legume. It consists of high-quality protein for human consumption, and it is r…	Rejected	review
acs AND gene AND expression AND drought AND stress AND plants AND pgpr	Scopus	Comparative Evaluation of Different Salt-Tolerant Plant Growth-Promoting Bacterial Isolates in Mitigating the Induced Adverse Effect of Salinity in Pisum sativum	Gupta et al., 2021		Rejected	Duplicate
acs AND gene AND expression AND drought AND stress AND plants AND pgpr	Scopus	Effect of Aspergillus and Bacillus Concentration on Cotton Growth Promotion.	Escobar Diaz et al., 2021	There are no studies in literature on the effect of inoculant concentrations on plant growth promotion. Therefore, in the present study, two experiments were carried out, one under pot conditions and the other in the field with cotton crop, in order to verify the effect of Aspergillus and Bacillus concentrations on the biometric and nutritional parameters of plant and soil, in addition to yield. …	Rejected	No abiotic stress
acs AND gene AND expression AND drought AND stress AND plants AND pgpr	Scopus	Melatonin in Plant Defense against Abiotic Stress	Rehaman et al., 2021	Abiotic stress adversely affects plant growth and metabolism and as such reduces plant productivity. Recognized as a major contributor in the production of reactive oxygen species (ROS), it hinders the growth of plants through induction of oxidative stress. Biostimulants such as melatonin have a multifunctional role, acting as a defense strategy in minimizing the effects of oxidative stress. Mela…	Rejected	Review
acs AND gene AND expression AND drought AND stress AND plants AND pgpr	Scopus	Plant Tolerance to Drought Stress in the Presence of Supporting Bacteria and Fungi: An Efficient Strategy in Horticulture	Hanaka et al., 2021	Increasing temperature leads to intensive water evaporation, contributing to global warming and consequently leading to drought stress. These events are likely to trigger modifications in plant physiology and microbial functioning due to the altered availability of nutrients. Plants exposed to drought have developed different strategies to cope with stress by morphological, physiological, anatomi…	Rejected	Review
acs AND gene AND expression AND drought AND stress AND plants AND pgpr	Scopus	Malus Antioxidant Metabolism Following Bacterial–Fungal Inoculation in Organic Farming: From Root to Fruit	Łata et al., 2021	This study investigated the antioxidant status of roots, leaves, and fruit upon microbial inoculation (AMF+PGPR, arbuscular mycorrhizal fungi, and plant growth-promoting rhizobacteria, respectively) of young organically farmed apple trees over two growing seasons. Three cultivars— ‘Topaz’, ‘Chopin’, and ‘Odra’—were selected to test the relationship between inoculation and enzymatic and non-enzyma…	Rejected	No abiotic stress
acs AND gene AND expression AND drought AND stress AND plants AND pgpr	Scopus	Rhizosphere Bacteria in Plant Growth Promotion, Biocontrol, and Bioremediation of Contaminated Sites: A Comprehensive Review of Effects and Mechanisms	Saeed et al., 2021	Agriculture in the 21st century is facing multiple challenges, such as those related to soil fertility, climatic fluctuations, environmental degradation, urbanization, and the increase in food demand for the increasing world population. In the meanwhile, the scientific community is facing key challenges in increasing crop production from the existing land base. In this regard, traditional farming…	Rejected	Review
acs AND gene AND expression AND drought AND stress AND plants AND pgpr	Scopus	Fab Advances in Fabaceae for Abiotic Stress Resilience: From ‘Omics’ to Artificial Intelligence	Singh et al., 2021	Legumes are a better source of proteins and are richer in diverse micronutrients over the nutritional profile of widely consumed cereals. However, when exposed to a diverse range of abiotic stresses, their overall productivity and quality are hugely impacted. Our limited understanding of genetic determinants and novel variants associated with the abiotic stress response in food legume crops restr…	Rejected	Review
acs AND gene AND expression AND drought AND stress AND plants AND pgpr	Scopus	Plant–Microbe Interaction: Aboveground to Belowground, from the Good to the Bad	Nadarajah et al., 2021	Soil health and fertility issues are constantly addressed in the agricultural industry. Through the continuous and prolonged use of chemical heavy agricultural systems, most agricultural lands have been impacted, resulting in plateaued or reduced productivity. As such, to invigorate the agricultural industry, we would have to resort to alternative practices that will restore soil health and ferti…	Rejected	Review
acs AND gene AND expression AND drought AND stress AND plants AND pgpr	Scopus	The biological approaches of altering the growth and biochemical properties of medicinal plants under salinity stress	Miransari et al., 2021		Rejected	Duplicate
acs AND gene AND expression AND drought AND stress AND plants AND pgpr	Scopus	Biotechnological approaches in agriculture and environmental management - bacterium Kocuria rhizophila 14ASP as heavy metal and salt- tolerant plant growth- promoting strain	Afridi et al., 2021		Rejected	Duplicate
acs AND gene AND expression AND drought AND stress AND plants AND pgpr	Scopus	Plant-microbial interaction: The mechanism and the application of microbial elicitor induced secondary metabolites biosynthesis in medicinal plants	Chamkhi et al., 2021	Plants and microbes interact with each other via different chemical signaling pathways. At the risophere level, the microbes can secrete molecules, called elicitors, which act on their receptors located in plant cells. The so- called elicitor molecules as well as their actions differ according to the mcirobes and induce different bilogical responses in plants such as the synthesis of secondary me…	Rejected	Review
acs AND gene AND expression AND drought AND stress AND plants AND pgpr	Scopus	Enthralling the impact of engineered nanoparticles on soil microbiome: A concentric approach towards environmental risks and cogitation	Khanna et al., 2021	Nanotechnology is an avant-garde field of scientific research that revolutionizes technological advancements in the present world. It is a cutting-edge scientific approach that has undoubtedly a plethora of functions in controlling environmental pollutants for the welfare of the ecosystem. However, their unprecedented utilization and hysterical release led to a huge threat to the soil microbiome.…	Rejected	Review
acs AND gene AND expression AND drought AND stress AND plants AND pgpr	Scopus	A Review of Recent Advances and Future Directions in the Management of Salinity Stress in Finger Millet.	Mbinda et al., 2021	Salinity stress is a major environmental impediment affecting the growth and production of crops. Finger millet is an important cereal grown in many arid and semi-arid areas of the world characterized by erratic rainfall and scarcity of good-quality water. Finger millet salinity stress is caused by the accumulation of soluble salts due to irrigation without a proper drainage system, coupled with …	Rejected	Review
acs AND gene AND expression AND drought AND stress AND plants AND pgpr	Scopus	Effects of nanoparticles on trace element uptake and toxicity in plants: A review	Rizwan et al., 2021	Agricultural soils are receiving higher inputs of trace elements (TEs) from anthropogenic activities. Application of nanoparticles (NPs) in agriculture as nano-pesticides and nano-fertilizers has gained rapid momentum worldwide. The NPs-based fertilizers can facilitate controlled-release of nutrients which may be absorbed by plants more efficiently than conventional fertilizers. Due to their larg…	Rejected	Review
acs AND gene AND expression AND drought AND stress AND plants AND pgpr	Scopus	The Effect of Foliar Application of Melatonin on Changes in Secondary Metabolite Contents in Two Citrus Species Under Drought Stress Conditions.	Jafari et al., 2021	Plant secondary metabolites are compounds that play an important role in plant interactions and defense. Persian lime and Mexican lime as the two most important sour lime varieties with high levels of secondary metabolites, are widely cultivated in tropical and subtropical areas. Melatonin is a pleiotropic molecule that plays a key role in protecting plants against drought stress through regulati…	Rejected	No PGPR
acs AND gene AND expression AND drought AND stress AND plants AND pgpr	Scopus	Selenium nanoparticles ameliorate Brassica napus L. cadmium toxicity by inhibiting the respiratory burst and scavenging reactive oxygen species	Qi et al., 2021	Cadmium (Cd) is a widely distributed soil contaminant which induces oxidative damage and is therefore toxic to plants. Although selenium oxyanions such as selenite (SeO3 2-) and selenate (SeO4 2-) can alleviate Cd stress to plants, it is not known whether selenium nanoparticles (SeNPs) are able to do the same. The present study demonstrated the positive impact of both SeNPs and SeO3 2- on Brassic…	Rejected	No PGPR
acs AND gene AND expression AND drought AND stress AND plants AND pgpr	Scopus	Multifunctional Therapeutic Potential of Phytocomplexes and Natural Extracts for Antimicrobial Properties	Rahman et al., 2021	Natural products have been known for their antimicrobial factors since time immemorial. Infectious diseases are a worldwide burden that have been deteriorating because of the improvement of species impervious to various anti-infection agents. Hence, the distinguishing proof of antimicrobial specialists with high-power dynamic against MDR microorganisms is central to conquer this issue. Successful…	Rejected	Review
acs AND gene AND expression AND drought AND stress AND plants AND pgpr	Scopus	Transcriptome Analyses of Barley Roots Inoculated with Novel Paenibacillus sp. and Erwinia gerundensis Strains Reveal Beneficial Early-Stage Plant–Bacteria Interactions	Li et al., 2021	Plant growth-promoting bacteria can improve host plant traits including nutrient uptake and metabolism and tolerance to biotic and abiotic stresses. Understanding the molecular basis of plant–bacteria interactions using dual RNA-seq analyses provides key knowledge of both host and bacteria simultaneously, leading to future enhancements of beneficial interactions. In this study, dual RNA-seq analy…	Rejected	No ACS
acs AND gene AND expression AND drought AND stress AND plants AND pgpr	Scopus	A review on drought stress in plants: Implications, mitigation and the role of plant growth promoting rhizobacteria	Ahluwalia et al., 2021	Increasing population and subsequent food requirement puts a lot of onus on agriculture worldwide. However, agricultural output is constantly influenced by several factors such as small land holdings, lack of proper mechanization, and occurrence of several abiotic and biotic stresses. Drought stress is one such abiotic stress which causes major setbacks to agricultural productivity every year. Wa…	Rejected	Review
acs AND gene AND expression AND drought AND stress AND plants AND pgpr	Scopus	Phytostimulation and biocontrol potential of Gram‑positive endospore‑forming Bacilli	Soni et al., 2021	The members of the genera Bacillus and Paenibacillus isolated from several ecological habitats are been thoroughly dissected for their effective application in the development of sustainable and eco-friendly agriculture. Numerous Bacillus and Paenibacillus species are reported as plant growth-promoting bacteria influencing the health and productivity of the food crops. This review narrates the me…	Rejected	Review
acs AND gene AND expression AND drought AND stress AND plants AND pgpr	Scopus	Bacterial volatile compound-based tools for crop management and quality	Cellini et al., 2021	Bacteria produce a huge diversity of metabolites, many of which mediate ecological relations. Among these, volatile compounds cause broad-range effects at low doses and, therefore, may be exploited for plant defence strategies and agricultural production, but such applications are still in their early development. Here, we review the latest technologies involving the use of bacterial volatile com…	Rejected	Review
acs AND gene AND expression AND drought AND stress AND plants AND pgpr	Scopus	The remediation potential for PAHs of Verbascum sinuatum L. combined with an enhanced rhizosphere landscape: A full-scale mesocosm experiment	Zuzolo et al., 2021	A full-scale mesocosm study was conducted to depict how integrated biological systems interact to adapt to contaminant stress and improve remediation of polycyclic aromatic hydrocarbons (PAHs)contaminated soils. The combination of Verbascum sinuatum L. and microbial consortium (fungi and bacteria) was employed along with three differently contaminated soils. After 240 days the highest PAHs remova…	Rejected	No ACS
