# Supplementary material for: Meta-analysis of plant growth-promoting rhizobacteria interaction with host plants: implications for drought stress response gene expression
Source: Front Plant Sci. 2024 Jan 15;14:1282553. doi: 10.3389/fpls.2023.1282553 (PMC10823023; doi:10.3389/fpls.2023.1282553)
Supplement: Supplementary file 17 [file Table_2.xlsx]

## Sheet: Foglio1
Keywords	Source	Title	Author	Abstract	Accepted/Rejected	Reason
APX' + 'gene expression'+ 'abiotic stress' + ' plants'+ 'PGPR'	Google scholar	Probiotics and Plant Health	Etesami et al., 2017		Rejected	Book
APX' + 'gene expression'+ 'abiotic stress' + ' plants'+ 'PGPR'	Google scholar	Plant Ecophysiology and Adaptation under Climate Change: Mechanisms and Perspectives II	Hasanuzzaman et al., 2020		Rejected	Book
APX' + 'gene expression'+ 'abiotic stress' + ' plants'+ 'PGPR'	Google scholar	Sustainable Agriculture in the Era of Climate Change	Kabiraj et al., 2020		Rejected	Book
APX' + 'gene expression'+ 'abiotic stress' + ' plants'+ 'PGPR'	Google scholar	Wheat Production in Changing Environments Responses, Adaptation and Tolerance	Lastochkina et al., 2019		Rejected	Book
APX' + 'gene expression'+ 'abiotic stress' + ' plants'+ 'PGPR'	Google scholar	Field Crops: Sustainable Management by PGPR	Maheshwari et al., 2019		Rejected	Book
APX' + 'gene expression'+ 'abiotic stress' + ' plants'+ 'PGPR'	Google scholar	Plant Growth-Promoting Microbes for Sustainable Biotic and Abiotic Stress Management	Monteiro et al., 2021		Rejected	Book
APX' + 'gene expression'+ 'abiotic stress' + ' plants'+ 'PGPR'	Google scholar	Antioxidants in Plant- Microbe Interaction	Nivetha et al., 2021		Rejected	Book
APX' + 'gene expression'+ 'abiotic stress' + ' plants'+ 'PGPR'	Google scholar	Antioxidants in Plant- Microbe Interaction	Parameswaran et al., 2021		Rejected	Book
APX' + 'gene expression'+ 'abiotic stress' + ' plants'+ 'PGPR'	Google scholar	Plant Growth Regulators Signalling Under Stress Conditions	Sabagh et al., 2021		Rejected	Book
APX' + 'gene expression'+ 'abiotic stress' + ' plants'+ 'PGPR'	Google scholar	Plant Growth Promoting Rhizobacteria for Sustainable Stress Management Volume 1: Rhizobacteria in Abiotic Stress Management	Sayyed et al., 2019		Rejected	Book
APX' + 'gene expression'+ 'abiotic stress' + ' plants'+ 'PGPR'	Google scholar	Rhizosphere Biology: Interactions Between Microbes and Plants	Sharma et al., 2021		Rejected	Book
APX' + 'gene expression'+ 'abiotic stress' + ' plants'+ 'PGPR'	Google scholar	Plant-Microbe Interactions in Agro- Ecological Perspectives	Singh et al., 2017		Rejected	Book
APX' + 'gene expression'+ 'abiotic stress' + ' plants'+ 'PGPR'	Google scholar	Microbial Interventions in Agriculture and Environment	Singh et al., 2019		Rejected	Book
APX' + 'gene expression'+ 'abiotic stress' + ' plants'+ 'PGPR'	Google scholar	Antioxidants in Plant- Microbe Interaction	Singh et al., 2021		Rejected	Book
APX' + 'gene expression'+ 'abiotic stress' + ' plants'+ 'PGPR'	Google scholar	Antioxidants in Plant- Microbe Interaction	Singh et al., 2021		Rejected	Duplicate
APX' + 'gene expression'+ 'abiotic stress' + ' plants'+ 'PGPR'	Google scholar	Priming and Pretreatment of Seeds and Seedlings Implication in Plant Stress Tolerance and Enhancing Productivity in Crop Plants	Ullah et al., 2019		Rejected	Book
APX' + 'gene expression'+ 'abiotic stress' + ' plants'+ 'PGPR'	Google scholar	Plant Abiotic Stress Tolerance Agronomic, Molecular and Biotechnological Approaches	Yameen et al., 2019		Rejected	Book
APX' + 'gene expression'+ 'abiotic stress' + ' plants'+ 'PGPR'	Google scholar	Bacterial Volatile Compounds as Mediators of Airborne Interactions	Zhang et al., 2020		Rejected	Book
APX' + 'gene expression'+ 'abiotic stress' + ' plants'+ 'PGPR'	Google scholar	Streptomyces alleviate drought stress in tomato plants and modulate the expression of transcription factors ERF1 and WRKY70 genes	Abbasi et al., 2020	Application of PGPRs that are tolerant to abiotic stresses is a promising approach to reduce the negative effects of drought stress and increase crop production. This study was designed to select and evaluate stress-tolerance PGP Streptomyces strains based on in vitro and in vivo experiments. Our results showed that only a small percentage (14 %) of 107 Streptomyces can produce ACCD. The effect o…	Accepted
APX' + 'gene expression'+ 'abiotic stress' + ' plants'+ 'PGPR'	Google scholar	Plant growth promoting Streptomyces strains are selectively interacting with the wheat cultivars especially in saline conditions	Akbari et al., 2020	Plant growth promoting (PGP) effect of Streptomyces on wheat growth in different conditions has been mostly reported although mechanisms which caused wheat cultivars differently response to a PGP Streptomyces has been less studied. In this study, the effect of two Streptomyces strains, previously reported as PGPR, on the growth of four salt-sensitive commercial wheat cultivars under normal and sa…	Rejected	No drought stress
APX' + 'gene expression'+ 'abiotic stress' + ' plants'+ 'PGPR'	Google scholar	Bacillus mycoides PM35 Reinforces Photosynthetic Efficiency, Antioxidant Defense, Expression of Stress-Responsive Genes, and Ameliorates the Effects of Salinity Stress in Maize	Ali et al., 2022	Soil salinity is one of the abiotic constraints that imbalance nutrient acquisition, hampers plant growth, and leads to potential loss in agricultural productivity. Salt-tolerant plant growth- promoting rhizobacteria (PGPR) can alleviate the adverse impacts of salt stress by mediating molec- ular, biochemical, and physiological status. In the present study, the bacterium Bacillus mycoides PM35 sh…	Rejected	No drought stress
APX' + 'gene expression'+ 'abiotic stress' + ' plants'+ 'PGPR'	Google scholar	PGPR-Mediated Salt Tolerance in Maize by Modulating Plant Physiology, Antioxidant Defense, Compatible Solutes Accumulation and Bio-Surfactant Producing Genes	Ali et al., 2022	Salinity stress is a barrier to crop production, quality yield, and sustainable agriculture. The current study investigated the plant growth promotion, biochemical and molecular characterization of bacterial strain Enterobacter cloacae PM23 under salinity stress (i.e., 0, 300, 600, and 900 mM). E. cloacae PM23 showed tolerance of up to 3 M NaCl when subjected to salinity stress. Antibiotic- resis…	Rejected	No drought stress
APX' + 'gene expression'+ 'abiotic stress' + ' plants'+ 'PGPR'	Google scholar	Halo-tolerant plant growth promoting rhizobacteria for improving productivity and remediation of saline soils	Arora et al., 2020	Background: The collective impact of climate change and soil salinity is continuously increasing the degraded lands across the globe, bringing agricultural productivity and food security under stress. The high concentration of salts in saline soils impose osmotic, ionic, oxidative and water stress in plants. Biological solutions can be the most reliable and sustainable approach to ensure food sec…	Rejected	Review
APX' + 'gene expression'+ 'abiotic stress' + ' plants'+ 'PGPR'	Google scholar	Amelioration of chromium and heat stresses in Sorghum bicolor by Cr6þ reducing-thermotolerant plant growth promoting bacteria	Bruno et al., 2020	Climatic factors particularly increased atmospheric temperature (IAT) greatly alters plant microbe and heavy metal interactions and subsequently reduces plant growth and phytoremediation efficiency. The aim of the study was to assess the effects of inoculation of chromium reducing-thermotolerant plant growth promoting bacteria (CRT-PGPB) on plant growth, physiological responses and chromium (Cr) …	Rejected	No drought stress
APX' + 'gene expression'+ 'abiotic stress' + ' plants'+ 'PGPR'	Google scholar	Communication of plants with microbial world: Exploring the regulatory networks for PGPR mediated defense signaling	Bukhat et al., 2020	Agricultural manipulation of potentially beneficial rhizosphere microbes is increasing rapidly due to their multi- functional plant-protective and growth related benefits. Plant growth promoting rhizobacteria (PGPR) are mostly non-pathogenic microbes which exert direct benefits on plants while there are rhizosphere bacteria which indirectly help plant by ameliorating the biotic and/or abiotic str…	Rejected	Review
APX' + 'gene expression'+ 'abiotic stress' + ' plants'+ 'PGPR'	Google scholar	Bio-priming of seeds: Plant stress management and its underlying cellular, biochemical and molecular mechanisms	Chakraborti et al., 2022	Exposure of crops to stress is the most significant barrier to agricultural output and food security worldwide. Stress induces changes in plants’ physiological functions, which leads to lower plant growth and agricultural yield. Plants undergo a variety of molecular, cellular, and physiological changes to combat various abiotic stresses. Plants suffer from increased osmotic pressure outside the r…	Rejected	Review
APX' + 'gene expression'+ 'abiotic stress' + ' plants'+ 'PGPR'	Google scholar	Plant Growth-Promoting Rhizobacteria as a Green Alternative for Sustainable Agriculture	Chandran et al., 2021	Environmental stress is a major challenge for sustainable food production as it reduces yield by generating reactive oxygen species (ROS) which pose a threat to cell organelles and biomolecules such as proteins, DNA, enzymes, and others, leading to apoptosis. Plant growth-promoting rhizobac- teria (PGPR) offers an eco-friendly and green alternative to synthetic agrochemicals and conventional agri…	Rejected	Review
APX' + 'gene expression'+ 'abiotic stress' + ' plants'+ 'PGPR'	Google scholar	Salt-Tolerant Plant Growth Promoting Rhizobacteria for Enhancing Crop Productivity of Saline Soils	Egamberdieva et al., 2019	Soil salinity has emerged as a serious issue for global food security. It is estimated that currently about 62 million hectares or 20 percent of the world’s irrigated land is affected by salinity. The deposition of an excess amount of soluble salt in cultivable land directly affects crop yields. The uptake of high amount of salt inhibits diverse physiological and metabolic processes of plants eve…	Rejected	Review
APX' + 'gene expression'+ 'abiotic stress' + ' plants'+ 'PGPR'	Google scholar	Inoculation of maize seeds with Pseudomonas putida leads to enhanced seedling growth in combination with modified regulation of miRNAs and antioxidant enzymes	Aydinoglu et al., 2020	Bacteria that positively interact with plant roots are defined as plant growth promoting rhizobacteria (PGPR). Although the positive effect of PGPR on plant growth has been widely studied, their impact on genetic regulation during plant growth processes remains largely unknown. Therefore, this study aimed to gain a deeper understanding of the regulatory role of miRNA and redox enzymes in response…	Rejected	Proteomic study
APX' + 'gene expression'+ 'abiotic stress' + ' plants'+ 'PGPR'	Google scholar	Plant Growth-Promoting Rhizobacteria: Context, Mechanisms of Action, and Roadmap to Commercialization of Biostimulants for Sustainable Agricultur	Backer et al., 2018	Microbes of the phytomicrobiome are associated with every plant tissue and, in combination with the plant form the holobiont. Plants regulate the composition and activity of their associated bacterial community carefully. These microbes provide a wide range of services and benefits to the plant; in return, the plant provides the microbial community with reduced carbon and other metabolites. Soils…	Rejected	Review
APX' + 'gene expression'+ 'abiotic stress' + ' plants'+ 'PGPR'	Google scholar	Potential of plant growth promoting bacteria (PGPB) on drought stress alleviation of wheat (Triticum aestivum L.) for dry condition- A Review	Hussaini et al., 2021	Lack of water is one of the limiting factors of wheat production in arid and semi-arid regions in the world and farmers suffer more in order to produce wheat. One of the strategy that requires wheat production or coping with drought is stress the use of probiotic and PGPR microorganisms. This bacterium with different mechanisms reduces the drought stress of wheat. PGPR by colonizing rhizospheres …	Rejected	Review
APX' + 'gene expression'+ 'abiotic stress' + ' plants'+ 'PGPR'	Google scholar	Role of plant growth-promoting rhizobacteria in boosting the phytoremediation of stressed soils: Opportunities, challenges, and prospects	Bhanse et al., 2022	Soil is considered as a vital natural resource equivalent to air and water which supports growth of the plants and provides habitats to microorganisms. Changes in soil properties, productivity, and, inevitably contamination/ stress are the result of urbanisation, industrialization, and long-term use of synthetic fertiliser. Therefore, in the recent scenario, reclamation of contaminated/stressed s…	Rejected	Review
APX' + 'gene expression'+ 'abiotic stress' + ' plants'+ 'PGPR'	Google scholar	Plant growth promoting rhizobacteria Dietzia natronolimnaea modulates the expression of stress responsive genes providing protection of wheat from salinity stress	Bharti et al., 2016	Plant growth promoting rhizobacteria (PGPR) hold promising future for sustainable agriculture. Here, we demonstrate a carotenoid producing halotolerant PGPR Dietzia natronolimnaea STR1 protecting wheat plants from salt stress by modulating the transcriptional machinery responsible for salinity tolerance in plants. The expression studies confirmed the involvement of ABA-signalling cascade, as TaAB…	Rejected	No drought stress
APX' + 'gene expression'+ 'abiotic stress' + ' plants'+ 'PGPR'	Google scholar	A multifaceted rhizobacterium Paenibacillus lentimorbus alleviates nutrient deficiency-induced stress in Cicer arietinum L.	Bisht et al., 2019	Nutrient deficiency in soil is one of the limiting factors responsible for stunted growth and poor flowering/ fruiting of crops which result in decline in overall agricultural productivity. However, one important strategy to overcome the problem of nutrient deficiency and to avoid use of chemical fertilizers is the use of plant growth promoting rhizobacteria (PGPR). Paenibacillus lentimorbus NRRL…	Rejected	No drought stress
APX' + 'gene expression'+ 'abiotic stress' + ' plants'+ 'PGPR'	Google scholar	Bacillus amyloliquefaciens MBI600 differentially induces tomato defense signaling pathways depending on plant part and dose of application	Dimopoulou et al., 2019	The success of Bacillus amyloliquefaciens as a biological control agent relies on its ability to outgrow plant pathogens. It is also thought to interact with its plant host by inducing systemic resistance. In this study, the ability of B. amyloliquefaciens MBI600 to elicit defense (or other) responses in tomato seedlings and plants was assessed upon the expression of marker genes and transcriptom…	Rejected	Biotic stress
APX' + 'gene expression'+ 'abiotic stress' + ' plants'+ 'PGPR'	Google scholar	Southern blight disease of tomato control by 1-aminocyclopropane-1-carboxylate (ACC) deaminase producing Paenibacillus lentimorbus B-30488	Dixit et al., 2016	Tomato cultivation is highly susceptible for soil born diseases and among them southern blight disease caused by Scelerotium rolfsii is very common. For its management use of chemical fungicides is not very successful as their spores are able to survive for many years in the soil. As an alternative eco-friendly approach to control the disease antagonistic microbes are being characterized.Among th…	Rejected	Biotic stress
APX' + 'gene expression'+ 'abiotic stress' + ' plants'+ 'PGPR'	Google scholar	Paenibacillus lentimorbus Enhanced Abiotic Stress Tolerance Through Lateral Root Formation and Phytohormone Regulation	Dixit et al., 2022	Under the stressed conditions plant growth-promoting rhizobacteria (PGPR) are able to stimulate plant growth through several mechanisms, including antioxidants alleviation, regulation of stress responsive genes and phytohormones etc. Pre- sent study is conducted to investigate the impact of Paenibacillus lentimorbus B-30488 inoculation on salinity and drought stress mitigation in Arabidopsis thal…	Rejected	Proteomic study
APX' + 'gene expression'+ 'abiotic stress' + ' plants'+ 'PGPR'	Google scholar	Phytohormones and Beneficial Microbes: Essential Components for Plants to Balance Stress and Fitness	Egamberdieva et al., 2017	Plants are subjected to various abiotic stresses, such as drought, extreme temperature, salinity, and heavy metals. Abiotic stresses have negative impact on the physiology and morphology of plants through defects in the genetic regulation of cellular pathways. Plants employ several tolerance mechanisms and pathways to avert the effects of stresses that are triggered whenever alterations in metabo…	Rejected	review
APX' + 'gene expression'+ 'abiotic stress' + ' plants'+ 'PGPR'	Google scholar	Induced Salt Tolerance of Perennial Ryegrass by a Novel Bacterium Strain from the Rhizosphere of a Desert Shrub Haloxylon ammodendron	He et al., 2017	Drought and soil salinity reduce agricultural output worldwide. Plant-growth-promoting rhizobacteria (PGPR) can enhance plant growth and augment plant tolerance to biotic and abiotic stresses. Haloxylon ammodendron, a C4 perennial succulent xerohalophyte shrub with excellent drought and salt tolerance, is naturally distributed in the desert area of northwest China. In our previous work, a bacteri…	Rejected	No drought stress
APX' + 'gene expression'+ 'abiotic stress' + ' plants'+ 'PGPR'	Google scholar	Role of ACC deaminase producing bacteria for abiotic stress management and sustainable agriculture production	Chandwani et al., 2022	Plants are immobile and are exposed to various biotic and abiotic stresses, including heat, cold, drought, flooding, nutrient deficiency, heavy metal exposure, phytopathogens, and pest attacks. The stressors significantly affect agricultural productivity when exceed a certain threshold. It has been reported that most of the stressed plants are reported to have increased ethylene synthesis from it…	Rejected	review
APX' + 'gene expression'+ 'abiotic stress' + ' plants'+ 'PGPR'	Google scholar	Plant growth-promoting rhizobacterium Pseudomonas PS01 induces salt tolerance in Arabidopsis thaliana	Chu et al., 2019	Objectives: Plant growth-promoting rhizobacteria (PGPR) may contribute to sustainable crop production by improv- ing plant growth and/or plant tolerance to abiotic stresses. Soil salinity, which limits the productivity of crop plants, is one of the major concerns of modern agriculture, especially in countries heavily affected by climate change as Vietnam. Currently, only a few reports have studie…	Rejected	No drought stress
APX' + 'gene expression'+ 'abiotic stress' + ' plants'+ 'PGPR'	Google scholar	Alleviation of Phytophthora infestans Mediated Necrotic Stress in the Transgenic Potato (Solanum tuberosum L.) with Enhanced Ascorbic acid Accumulation	Chung et al., 2019	Potato is the most widely cultivated non-cereal crop in the world, and like any other crop, it is susceptible to yield losses because of various factors, including pathogen attacks. Among the various diseases of potato, late blight caused by the oomycete Phytophthora infestans is considered as the most devastating disease worldwide. In this study, transgenic potato plants overexpressing the D-gal…	Rejected	Biotic stress
APX' + 'gene expression'+ 'abiotic stress' + ' plants'+ 'PGPR'	Google scholar	Jasmonates counter plant stress: A Review	Dar et al., 2015	Jasmonates (JAs), the derivatives of lipids, act as vital signaling compounds in diverse plant stress responses and development. JAs are known to mediate defense responses against herbivores, necrotrophic pathogens, nematodes and other micro-organism besides alleviating abiotic stresses including UV-stress, osmotic stress, salt stress, cold stress, temperature stress, heavy metal stress, ozone st…	Rejected	review
APX' + 'gene expression'+ 'abiotic stress' + ' plants'+ 'PGPR'	Google scholar	Review on Drought Tolerance in Plants Induced by Plant Growth Promoting Rhizobacteria	Dar et al., 2018	Abiotic stresses are major constrains which adversely affect the plant growth and productivity. Among all abiotic stresses, drought is considered as one of the major constraints on agricultural productivity worldwide and is likely to further increase. Hence the need of the hour is to formulate the strategies that can minimize the loss in crop production under drought conditions. One of them being…	Rejected	review
APX' + 'gene expression'+ 'abiotic stress' + ' plants'+ 'PGPR'	Google scholar	Roles of Arbuscular Mycorrhizal Fungi on Plant Growth and Performance: Importance in Biotic and Abiotic Stressed Regulation	Diagne et al., 2020	Arbuscular mycorrhizal fungi (AMF) establish symbiotic associations with most terrestrial plants. These soil microorganisms enhance the plant’s nutrient uptake by extending the root absorbing area. In return, the symbiont receives plant carbohydrates for the completion of its life cycle. AMF also helps plants to cope with biotic and abiotic stresses such as salinity, drought, extreme temperature,…	Rejected	review
APX' + 'gene expression'+ 'abiotic stress' + ' plants'+ 'PGPR'	Google scholar	Can interaction between silicon and plant growth promoting rhizobacteria benefit in alleviating abiotic and biotic stresses in crop plants?	Etesami et al., 2018	Increased environmental stresses are among the most limiting factors for agricultural productivity across the world. Reliable, environmentally friendly techniques are needed to sustainably meet growing global food de- mands. Some plant-microbe interactions can alleviate stress, with the application of plant growth promoting rhizobacteria (PGPRs) that is now widely in use. It has been known that P…	Rejected	review
APX' + 'gene expression'+ 'abiotic stress' + ' plants'+ 'PGPR'	Google scholar	Use of plant growth promoting rhizobacteria (PGPRs) with multiple plant growth promoting traits in stress agriculture: Action mechanisms and future prospects	Etesami et al., 2018	Increased incidence of abiotic stresses impacting adversely plant growth and productivity in major crops is being witnessed all over the world. Therefore, as a result of such stress factors, plant growth under the stress conditions will be less than the non-stress conditions. Growing concerns and global demand for correct, environmentally- friendly techniques exist to reduce the adverse effects o…	Rejected	review
APX' + 'gene expression'+ 'abiotic stress' + ' plants'+ 'PGPR'	Google scholar	Potential role of phytohormones and plant growth-promoting rhizobacteria in abiotic stresses: consequences for changing environment	Fahad et al., 2015	Plants are sessile beings, so the need of mecha- nisms to flee from unfavorable circumstances has provided the development of unique and sophisticated responses to environmental stresses. Depending on the degree of plasticity, many morphological, cellular, anatomical, and physiological changes occur in plants in response to abiotic stress. Phyto- hormones are small molecules that play critical ro…	Rejected	review
APX' + 'gene expression'+ 'abiotic stress' + ' plants'+ 'PGPR'	Google scholar	Plant endophytes promote growth and alleviate salt stress in Arabidopsis thaliana	Fan et al., 2020	plant growth promoting rhizobacteria (pGpR) are a functionally diverse group of microbes having immense potential as biostimulants and stress alleviators. their exploitation in agro-ecosystems as an eco-friendly and cost-effective alternative to traditional chemical inputs may positively affect agricultural productivity and environmental sustainability. the present study describes selected rhizob…	Rejected	Proteomic study
APX' + 'gene expression'+ 'abiotic stress' + ' plants'+ 'PGPR'	Google scholar	Recent advances of PGPR based approaches for stress tolerance in plants for sustainable agriculture	Kumar et al., 2019	The increasing worldwide population is a significant challenge for agricultural food production to feed the alarming rate of the growing world population. The enhancing community directly affected by several factors, including the limitation of agricultural land, environmental damage, and the number of biotic and abiotic stresses, which affect global food production. It is essential to increase a…	Rejected	Review
APX' + 'gene expression'+ 'abiotic stress' + ' plants'+ 'PGPR'	Google scholar	Bacillus velezensis 5113 Induced Metabolic and Molecular Reprogramming during Abiotic Stress Tolerance in Wheat	El-Daim et al., 2019	Abiotic stresses are main limiting factors for agricultural production around the world. Plant growth promoting rhizobacteria (PGPR) have been shown to improve abiotic stress tolerance in several plants. However, the molecular and physiological changes connected with PGPR priming of stress management are poorly understood. The present investigation aimed to explore major metabolic and molecular c…	Rejected	Proteomic study
APX' + 'gene expression'+ 'abiotic stress' + ' plants'+ 'PGPR'	Google scholar	Salicylic Acid-Regulated Antioxidant Mechanisms and Gene Expression Enhance Rosemary Performance under Saline Conditions	El-Esawi et al., 2017	Salinity stress as a major agricultural limiting factor may influence the chemical composition and bioactivity of Rosmarinus officinallis L. essential oils and leaf extracts. The application of salicylic acid (SA) hormone may alleviate salinity stress by modifying the chemical composition, gene expression and bioactivity of plant secondary metabolites. In this study, SA was applied to enhance sal…	Rejected	No drought stress
APX' + 'gene expression'+ 'abiotic stress' + ' plants'+ 'PGPR'	Google scholar	Bacillus firmus (SW5) augments salt tolerance in soybean (Glycine max L.) by T modulating root system architecture, antioxidant defense systems and stress- responsive genes expression	El-Esawi et al., 2018	Soil salinity is an adverse abiotic factor which reduces plant growth, yield and quality. Plant growth-promoting rhizobacteria (PGPR) have a great potential to enhance growth and alleviate saline stress effects without harming the environment via regulating physiological and molecular processes in plants. This study aimed at investigating Bacillus firmus SW5 effects on the performance of soybean …	Rejected	No drought stress
APX' + 'gene expression'+ 'abiotic stress' + ' plants'+ 'PGPR'	Google scholar	Serratia liquefaciens KM4 Improves Salt Stress Tolerance in Maize by Regulating Redox Potential, Ion Homeostasis, Leaf Gas Exchange and Stress-Related Gene Expression	El-Esawi et al., 2018	High salinity mitigates crop productivity and quality. Plant growth-promoting soil rhizobacteria (PGPR) improve plant growth and abiotic stress tolerance via mediating various physiological and molecular mechanisms. This study investigated the effects of the PGPR strain Serratia liquefaciens KM4 on the growth and physiological and molecular responsiveness of maize (Zea mays L.) plants under salin…	Rejected	No drought stress
APX' + 'gene expression'+ 'abiotic stress' + ' plants'+ 'PGPR'	Google scholar	Azospirillum lipoferum FK1 confers improved salt tolerance in chickpea (Cicer arietinum L.) by modulating osmolytes, antioxidant machinery and stress- related genes expression	El-Esawi et al., 2019	High salinity restricts crop growth and yield. Plant growth-promoting soil rhizobacteria boost crops growth and ameliorate the adverse effects of salt stress through regulating several physiological, biochemical and molecular processes. This study investigated the effects of Azospirillum lipoferum FK1 strain on chickpea (Cicer arietinum L.) growth and performance under saline conditions (0, 75 an…	Accepted
APX' + 'gene expression'+ 'abiotic stress' + ' plants'+ 'PGPR'	Google scholar	Serratia marcescens BM1 Enhances Cadmium Stress Tolerance and Phytoremediation Potential of Soybean Through Modulation of Osmolytes, Leaf Gas Exchange, Antioxidant Machinery, and Stress-Responsive Genes Expression	El-Esawi et al., 2020	The heavy metal contamination in plant-soil environment has increased manifold recently. In order to reduce the harmful effects of metal stress in plants, the application of beneficial soil microbes is gaining much attention. In the present research, the role of Serratia marcescens BM1 in enhancing cadmium (Cd) stress tolerance and phytoremediation potential of soybean plants, was investigated. E…	Rejected	No drought stress
APX' + 'gene expression'+ 'abiotic stress' + ' plants'+ 'PGPR'	Google scholar	Plant Growth-Promoting Rhizobacteria Enhance Salinity Stress Tolerance in Okra through ROS-Scavenging Enzymes	Habib et al., 2016	Salinity is a major environmental stress that limits crop production worldwide. In this study, we characterized plant growth- promoting rhizobacteria (PGPR) containing 1-aminocyclopropane-1-carboxylate (ACC) deaminase and examined their effect on salinity stress tolerance in okra through the induction of ROS-scavenging enzyme activity. PGPR inoculated okra plants exhibited higher germination perc…	Rejected	No drought stress
APX' + 'gene expression'+ 'abiotic stress' + ' plants'+ 'PGPR'	Google scholar	Alleviation of Salt Stress in Pepper (Capsicum annum L.) Plants by Plant Growth-Promoting Rhizobacteria	Hahm et al.,2017	In the present study, we demonstrate that the growth of salt-stressed pepper plants is improved by inoculation with plant growth-promoting rhizobacteria (PGPR). Three PGPR strains (Microbacterium oleivorans KNUC7074, Brevibacterium iodinum KNUC7183, and Rhizobium massiliae KNUC7586) were isolated from the rhizosphere of pepper plants growing in saline soil, and pepper plants inoculated with these…	Rejected	Proteomic study
APX' + 'gene expression'+ 'abiotic stress' + ' plants'+ 'PGPR'	Google scholar	Biostimulants for the Regulation of Reactive Oxygen Species Metabolism in Plants under Abiotic Stress	Hasanuzzaman et al., 2021	Global food security for a growing population with finite resources is often challenged by multiple, simultaneously occurring on-farm abiotic stresses (i.e., drought, salinity, low and high temperature, waterlogging, metal toxicity, etc.) due to climatic uncertainties and variability. Breeding for multiple stress tolerance is a long-term solution, though developing multiple-stress-tolerant crop v…	Rejected	Review
APX' + 'gene expression'+ 'abiotic stress' + ' plants'+ 'PGPR'	Google scholar	Foliar application of ascorbic acid enhances salinity stress tolerance in barley (Hordeum vulgare L.) through modulation of morpho-physio-biochemical attributes, ions uptake, osmo-protectants and stress response genes expression	Hassan et al., 2021	Barley (Hordeum vulgare L.) is a major cereal grain and is known as a halophyte (a halophyte is a salt- tolerant plant that grows in soil or waters of high salinity). We therefore conducted a pot experiment to explore plant growth and biomass, photosynthetic pigments, gas exchange attributes, stomatal prop- erties, oxidative stress and antioxidant response and their associated gene expression and…	Rejected	No PGPR
APX' + 'gene expression'+ 'abiotic stress' + ' plants'+ 'PGPR'	Google scholar	Amelioration of thermal stress in crops by plant growth-promoting rhizobacteria	Mitra et al., 2021	Crops are affected by various types of abiotic stress, resulting in a decrease in agricultural productivity thereby challenging food-security issues. Among the different types of abiotic stresses, the temperature has been regarded as a major one followed by salt and drought stress. The increasing temperature causes an alteration in the period of growth and the distribution of crop plants. High-te…	Rejected	review
APX' + 'gene expression'+ 'abiotic stress' + ' plants'+ 'PGPR'	Google scholar	Drought-tolerant plant growth promoting Bacillus spp.: effect on growth, osmolytes, and antioxidant status of maize under drought stress	Vardharajula et al., 2011	InpresentstudyBacillusspp.screenedfordroughttolerancecouldtolerateminimalwaterpotential(􏰎0.73MPa) were evaluated for plant growth promoting properties at 􏰎0.73 MPa. Drought stress affected growth of isolates as indicated by increased intracellular free amino acids, proline, total soluble sugars, and exopolysaccharides. Drought-tolerantBacillusspp.HYD B17,HYTAPB18,HYDGRFB19,BKB30,RMPB44identifieda…	Rejected	Proteomic study
APX' + 'gene expression'+ 'abiotic stress' + ' plants'+ 'PGPR'	Google scholar	Plant growth promoting Curtobacterium albidum strain SRV4: An T agriculturally important microbe to alleviate salinity stress in paddy plants	Vimal et al., 2019	Present study examined the inoculation of halo-tolerant plant-growth-promoting-rhizobacteria (PGPR) on paddy plant growth parameters and physiology under different salinity (0, 100, 200 and 300 mM) conditions. Twenty- nine promising halo-tolerant PGPRs were isolated and screened for their PGP traits from the rhizosphere of naturally growing plants of saline soils located at Sandila region of Hard…	Rejected	Proteomic study
APX' + 'gene expression'+ 'abiotic stress' + ' plants'+ 'PGPR'	Google scholar	Enhancement of drought stress tolerance in crops by plant growth promoting rhizobacteria	Vurukonda et al., 2016	Drought is one of the major constraints on agricultural productivity worldwide and is likely to further increase. Several adaptations and mitigation strategies are required to cope with drought stress. Plant growth promoting rhizobacteria (PGPR) could play a significant role in alleviation of drought stress in plants. These beneficial microorganisms colonize the rhizosphere/endo-rhizosphere of pl…	Rejected	Review
APX' + 'gene expression'+ 'abiotic stress' + ' plants'+ 'PGPR'	Google scholar	Bacterial Modulation of the Plant Ethylene Signaling Pathway Improves Tolerance to Salt Stress in Lettuce (Lactuca sativa L.)	Fortt et al., 2022	Salinity has extensive adverse effects on plant growth and the development of new agronomic strategies to improve crop salt tolerance is becoming necessary. Currently, the use of plant growth promoting rhizobacteria (PGPR) to mitigate abiotic stress in crops is of increasing interest. The most analyzed mechanism is based on ACC deaminase activity, an enzyme that decreases the ethylene synthesis, …	Rejected	Proteomic study
APX' + 'gene expression'+ 'abiotic stress' + ' plants'+ 'PGPR'	Google scholar	Priming of pathogenesis related-proteins and enzymes related to oxidative stress by plant growth promoting rhizobacteria on rice plants upon abiotic and biotic stress challenge	García-Cristobal et al., 2015	Two plant growth promoting rhizobacteria (PGPR) were tested to evaluate their capacity to prime rice seedlings against stress challenge (salt and Xanthomonas campestris infection). As is accepted that plants respond to biotic and abiotic stresses by generation of reactive oxygen species (ROS), enzyme activi- ties related to oxidative stress (ascorbate peroxidase (APX, EC 1.11.1.11), guaiacol pero…	Rejected	Proteomic study
APX' + 'gene expression'+ 'abiotic stress' + ' plants'+ 'PGPR'	Google scholar	Transcriptomics of Biostimulation of Plants Under Abiotic Stress	González-Morales et al., 2021	Plant biostimulants are compounds, living microorganisms, or their constituent parts that alter plant development programs. The impact of biostimulants is manifested in several ways: via morphological, physiological, biochemical, epigenomic, proteomic, and transcriptomic changes. For each of these, a response and alteration occur, and these alterations in turn improve metabolic and adaptive perfo…	Rejected	Review
APX' + 'gene expression'+ 'abiotic stress' + ' plants'+ 'PGPR'	Google scholar	Induction of drought tolerance in tomato upon the application of ACC deaminase producing plant growth promoting rhizobacterium Bacillus subtilis Rhizo SF 48	Gowtham et al., 2020	A total of ten 1-aminocyclopropane-1-carboxylate (ACC) deaminase producing PGPR isolates were selected and evaluated for the induction of drought stress tolerance in tomato. Among the selected PGPR, maximum seed (laboratory) and plant growth promotion (greenhouse) was observed in tomato seeds bacterized with Bacillus subtilis Rhizo SF 48. The genomic study confirmed the presence of ACC deaminase …	Rejected	Proteomic study
APX' + 'gene expression'+ 'abiotic stress' + ' plants'+ 'PGPR'	Google scholar	ACC deaminase producing plant growth promoting rhizobacteria enhance salinity stress tolerance in Pisum sativum	Gupta et al., 2021	Salinity stress is one of the most serious environmental stresses which limit plant growth, development and productivity. In this study, we screened 25 bacterial isolates based on the biochemical activity of ACC deaminase. Two potent PGPR namely Bacillus marisflavi (CHR JH 203) and Bacillus cereus (BST YS1_42) having the highest ACC deaminase (ACCD) activity were selected for further analyses suc…	Rejected	No drought stress
APX' + 'gene expression'+ 'abiotic stress' + ' plants'+ 'PGPR'	Google scholar	Plant Growth-Promoting Rhizobacteria Enhance Abiotic Stress Tolerance in Solanum tuberosum Through Inducing Changes in the Expression of ROS-Scavenging Enzymes and Improved Photosynthetic Performance	Gururani et al., 2013	In this report we address the changes in the expression of the genes involved in ROS scavenging and ethylene biosynthesis induced by the inoculation of plant growth-promoting rhizobacteria (PGPR) isolated from potato rhizosphere. The two Bacillus isolates used in this investigation had earlier demonstrated a striking influence on potato tuberization. These isolates showed enhanced 1-aminocyclopro…	Accepted
APX' + 'gene expression'+ 'abiotic stress' + ' plants'+ 'PGPR'	Google scholar	Prospective evaluation of individual and consortia plant growth promoting rhizobacteria for drought stress amelioration in rice (Oryza sativa L.)	Joshi et al., 2020	Aim Rice (Oryza sativa L.) being the most important crop for human population in Asia region, accounts for 23% of the world’s caloric intake. Due to the changing climatic conditions, the agricultural crops are experienc- ing vagaries of the weather more frequently leading to yield losses and even crop failure. The objective of this study was to find out a suitable consortium of bacterial inoculan…	Rejected	Proteomic study
APX' + 'gene expression'+ 'abiotic stress' + ' plants'+ 'PGPR'	Google scholar	Phosphate-Solubilizing and Auxin-Producing Rhizobacteria Promote Plant Growth Under Saline Conditions	Kadmiri et al., 2018	The world loses 3 ha of arable lands every minute due to salinization. To counteract adverse effects of salinity on plants, the use of PGPR is an efficient/cheaper method that induces salt stress tolerance in plants. The aim of the present work was to study auxin production and inorganic phosphate solubilization capacities of Pseudomonas fluorescens Ms-01 (A newly isolated strain from grapevine r…	Rejected	Proteomic study
APX' + 'gene expression'+ 'abiotic stress' + ' plants'+ 'PGPR'	Google scholar	Control of Drought Stress in Wheat Using Plant-Growth- Promoting Bacteria	Kasim et al., 2013	Abiotic stress conditions are the main limiting factors for crop cultivation around the world. In the present study we aimed to improve wheat growth under drought stress conditions through priming with beneficial bacteria considered as plant-growth promoting bacteria (PGPB). Two bacterial strains, Bacillus amyloliquefaciens 5113 and Azospirillum brasilense NO40, were used to prime the wheat cv. S…	Accepted
APX' + 'gene expression'+ 'abiotic stress' + ' plants'+ 'PGPR'	Google scholar	Rhizobacterial-plant interactions: Strategies ensuring plant growth promotion under drought and salinity stress	Kaushal et al., 2016	Drought and salinity are major environmental stresses resulting in secondary stresses such as osmotic and oxidative stress (common to both stresses) as well as ionic stress (during salinity) causing alterations in physiological, biochemical and molecular processes in plants resulting in substantial loss to crop productivity. The major physiological parameters studied in plants during stressed con…	Rejected	Review
APX' + 'gene expression'+ 'abiotic stress' + ' plants'+ 'PGPR'	Google scholar	Transcriptional responses of wheat roots inoculated with Arthrobacter nitroguajacolicus to salt stress	Safdarian et al., 2018	It is commonly accepted that bacteria actively interact with plant host and have beneficial effects on growth and adaptation and grant tolerance to various biotic and abiotic stresses. However, the mechanisms of plant growth promoting bacteria to communicate and adapt to the plant environment are not well characterized. Among the examined bacteria isolates from different saline soils, Arthrobacte…	Rejected	No drought stress
APX' + 'gene expression'+ 'abiotic stress' + ' plants'+ 'PGPR'	Google scholar	Plant Growth‐Promoting Rhizobacteria‐Mediated Adaptive Responses of Plants Under Salinity Stress	Hoque et al., 2022	In this recent era, several approaches have been developed to alleviate the adverse effects of salinity stress in different plants. However, some of them are not eco-friendly. In this context, evolving sustainable approaches which enhance the productiv- ity of saline soil without harming the environment are necessary. Many recent studies showed that plant growth-promoting rhizobacteria (PGPR) are…	Rejected	Review
APX' + 'gene expression'+ 'abiotic stress' + ' plants'+ 'PGPR'	Google scholar	Consequences and Mitigation Strategies of Abiotic Stresses in Wheat (Triticum aestivum L.) under the Changing Climate	Hossain et al., 2021	Wheat is one of the world’s most commonly consumed cereal grains. During abiotic stresses, the physiological and biochemical alterations in the cells reduce growth and development of plants that ultimately decrease the yield of wheat. Therefore, novel approaches are needed for sustainable wheat production under the changing climate to ensure food and nutritional security of the ever-increasing po…	Rejected	Review
APX' + 'gene expression'+ 'abiotic stress' + ' plants'+ 'PGPR'	Google scholar	Plant Growth Promoting Rhizobacteria in Amelioration of Salinity Stress: A Systems Biology Perspective	Ilangumaran et al., 2017	Salinity affects plant growth and is a major abiotic stress that limits crop productivity. It is well-understood that environmental adaptations and genetic traits regulate salinity tolerance in plants, but imparting the knowledge gained towards crop improvement remain arduous. Harnessing the potential of beneficial microorganisms present in the rhizosphere is an alternative strategy for improving…	Rejected	Review
APX' + 'gene expression'+ 'abiotic stress' + ' plants'+ 'PGPR'	Google scholar	Plant-Microbe Interactions in Alleviating Abiotic Stress—A Mini Review	Inbaraj et al., 2021	Crop plants are continuously exposed to various abiotic stresses like drought, salinity, ultraviolet radiation, low and high temperatures, flooding, metal toxicities, nutrient deficiencies which act as limiting factors that hampers plant growth and low agricultural productivity. Climate change and intensive agricultural practices has further aggravated the impact of abiotic stresses leading to a …	Rejected	Review
APX' + 'gene expression'+ 'abiotic stress' + ' plants'+ 'PGPR'	Google scholar	Introgression of SbERD4 Gene Encodes an Early-Responsive Dehydration-Stress Protein That Confers Tolerance against Different Types of Abiotic Stresses in Transgenic Tobacco	Jha et al., 2021	Salicornia brachiata is an extreme halophyte that commonly grows on marsh conditions and is also considered a promising resource for drought and salt-responsive genes. To unveil a glimpse of stress endurance by plants, it is of the utmost importance to develop an understanding of stress tolerance mechanisms. ‘Early Responsive to Dehydration’ (ERD) genes are defined as a group of genes involved in…	Rejected	No PGPR
APX' + 'gene expression'+ 'abiotic stress' + ' plants'+ 'PGPR'	Google scholar	Enhancement of growth and salt tolerance of rice seedlings (Oryza sativa L.) by regulating ethylene production with a novel halotolerant PGPR strain Glutamicibacter sp. YD01 containing ACC deaminase activity	Ji et al., 2020	Plant growth-promoting rhizobacteria can stimulate not only plant growth and development, but also alleviate the negative effects on plants caused by abiotic stresses. In this study, a novel halotolerant strain was isolated and identified as Glutamici- bacter sp. (YD01) using 16S rDNA analysis. This strain tolerated up to 10% NaCl and showed two growth-promoting traits such as 1-aminocyclopropane…	Rejected	Proteomic study
APX' + 'gene expression'+ 'abiotic stress' + ' plants'+ 'PGPR'	Google scholar	Plant growth promoting rhizobacteria induced Cd tolerance in Lycopersicon esculentum through altered antioxidative defense expression	Khanna et al., 2019	The present study was designed to determine the role of plant growth-promoting rhizobacteria (Pseu- domonas aeruginosa & Burkholderia gladioli) in alleviating Cd stress in Lycopersicon esculentum. Cd con- centration of 0.4 mM enhanced superoxide anions, MDA and H2O2 by 136%, 378% and 137% that also caused nuclear and cell viability damage. Cd enhanced the activities of enzymatic antioxidants such…	Rejected	No drought stress
APX' + 'gene expression'+ 'abiotic stress' + ' plants'+ 'PGPR'	Google scholar	Alleviation of Salt Stress by Enterobacter sp. EJ01 in Tomato and Arabidopsis Is Accompanied by Up-Regulation of Conserved Salinity Responsive Factors in Plants	Kim et al., 2014	Microbiota in the niches of the rhizosphere zones can af- fect plant growth and responses to environmental stress conditions via mutualistic interactions with host plants. Specifically, some beneficial bacteria, collectively referred to as Plant Growth Promoting Rhizobacteria (PGPRs), in- crease plant biomass and innate immunity potential. Here, we report that Enterobacter sp. EJ01, a bacterium i…	Rejected	Proteomic study
APX' + 'gene expression'+ 'abiotic stress' + ' plants'+ 'PGPR'	Google scholar	Microorganisms in Plant Growth and Development: Roles in Abiotic Stress Tolerance and Secondary Metabolites Secretion	Koza et al., 2022	Crops aimed at feeding an exponentially growing population are often exposed to a variety of harsh environmental factors. Although plants have evolved ways of adjusting their metabolism and some have also been engineered to tolerate stressful environments, there is still a shortage of food supply. An alternative approach is to explore the possibility of using rhizosphere microorganisms in the mit…	Rejected	Review
APX' + 'gene expression'+ 'abiotic stress' + ' plants'+ 'PGPR'	Google scholar	Understanding the role of miRNAs for improvement of tea quality and stress tolerance	Krishnatreya et al., 2021	MicroRNAs (miRNAs) are an emerging class of small non-coding RNAs that exhibit important role in regulation of gene expression, mostly through the mechanism of cleavage and/or inhibition of translation of target mRNAs during or after transcription. Although much has been unravelled about the role of miRNAs in diverse biological processes like maintenance of functional integrity of genes and genom…	Rejected	Review
APX' + 'gene expression'+ 'abiotic stress' + ' plants'+ 'PGPR'	Google scholar	Beneficial features of plant growth-promoting rhizobacteria for improving plant growth and health in challenging conditions: A methodical review	Oleńska et al., 2020	New eco-friendly approaches are required to improve plant biomass production. Beneficial plant growth- promoting (PGP) bacteria may be exploited as excellent and efficient biotechnological tools to improve plant growth in various – including stressful – environments. We present an overview of bacterial mechanisms which contribute to plant health, growth, and development. Plant growth promoting rh…	Rejected	Review
APX' + 'gene expression'+ 'abiotic stress' + ' plants'+ 'PGPR'	Google scholar	Microbes in Cahoots with Plants: MIST to Hit the Jackpot of Agricultural Productivity during Drought	Kaushal et al., 2019	Drought conditions marked by water deficit impede plant growth thus causing recurrent decline in agricultural productivity. Presently, research efforts are focussed towards harnessing the potential of microbes to enhance crop production during drought. Microbial communities, such as arbuscular mycorrhizal fungi (AMF) and plant growth-promoting rhizobacteria (PGPR) buddy up with plants to boost cr…	Rejected	Review
APX' + 'gene expression'+ 'abiotic stress' + ' plants'+ 'PGPR'	Google scholar	Rhizospheric Bacillus amyloliquefaciens Protects Capsicum annuum cv. Geumsugangsan From Multiple Abiotic Stresses via Multifarious Plant Growth-Promoting Attributes.	Kazerooni et al., 2021	Plant growth-promoting rhizobacteria (PGPR) are beneficial microorganisms that can be utilized to improve plant responses against biotic and abiotic stresses. In this study, we investigated whether PGPR (Bacillus amyloliquefaciens) isolated from the endorhizosphere of Sasamorpha borealis have the potential to sustain pepper growth under drought, salinity, and heavy metal stresses. The bacterial s…	Rejected	No APX
APX' + 'gene expression'+ 'abiotic stress' + ' plants'+ 'PGPR'	Google scholar	Crosstalk amongst phytohormones from planta and PGPR under biotic and abiotic stresses	Khan et al., 2020	Phytohormones are endogenously produced organic substances indispensable for regulating plant growth and yield and also play major role in inducing tolerance to plants against various biotic and abiotic stresses. The convergence points among hormone signal transduction cascades are considered as cross-talk which are crucial for plant development as well as for plant responses to biotic and abioti…	Rejected	Review
APX' + 'gene expression'+ 'abiotic stress' + ' plants'+ 'PGPR'	Google scholar	Rhizospheric Bacillus spp. Rescues Plant Growth Under Salinity Stress via Regulating Gene Expression, Endogenous Hormones, and Antioxidant System of Oryza sativa L.	Khan et al., 2021	Salinity has drastically reduced crop yields and harmed the global agricultural industry. We isolated 55 bacterial strains from plants inhabiting the coastal sand dunes of Pohang, Korea. A screening bioassay showed that 14 of the bacterial isolates secreted indole-3-acetic acid (IAA), 12 isolates were capable of exopolysaccharide (EPS) production and phosphate solubilization, and 10 isolates secr…	Rejected	No drought stress
APX' + 'gene expression'+ 'abiotic stress' + ' plants'+ 'PGPR'	Google scholar	Insights into the Interactions among Roots, Rhizosphere, and Rhizobacteria for Improving Plant Growth and Tolerance to Abiotic Stresses: A Review	Khan et al., 2021	Abiotic stresses, such as drought, salinity, heavy metals, variations in temperature, and ultraviolet (UV) radiation, are antagonistic to plant growth and development, resulting in an overall decrease in plant yield. These stresses have direct effects on the rhizosphere, thus severely affect the root growth, and thereby affecting the overall plant growth, health, and productivity. How- ever, the …	Rejected	Review
APX' + 'gene expression'+ 'abiotic stress' + ' plants'+ 'PGPR'	Google scholar	The intricacy of silicon, plant growth regulators and other signaling molecules for abiotic stress tolerance: An entrancing crosstalk between stress alleviators	Khan et al., 2021	Unfavorable environmental conditions are the critical inimical to the sustainable agriculture. Among various novel strategies designed to protect plants from abiotic stress threats, use of mineral elements as ‘stress miti- gators’ has emerged as the most crucial and interesting aspect. Silicon (Si) is a quasi-essential nutrient that mediates plant growth and development and interacts with plant g…	Rejected	Review
APX' + 'gene expression'+ 'abiotic stress' + ' plants'+ 'PGPR'	Google scholar	Mitigation of Salinity Stress in Wheat Seedlings Due to the Application of Phytohormone-Rich Culture Filtrate Extract of Methylotrophic Actinobacterium Nocardioides sp. NIMMe6	Meena et al., 2020	Salinity stress is an important plant growth limiting factor influencing crop productivity negatively. Microbial interventions for salinity stress mitigation have invited significant attention due to the promising impacts of interactive associations on the intrinsic mechanisms of plants. We report the impact of microbial inoculation of a halotolerant methylotrophic actinobacterium (Nocardioides s…	Rejected	No drought stress
APX' + 'gene expression'+ 'abiotic stress' + ' plants'+ 'PGPR'	Google scholar	Drought tolerant Ochrobactrum sp. inoculation performs multiple roles in maintaining the homeostasis in Zea mays L. subjected to deficit water stress	Mishra et al., 2020	Plant growth-promoting rhizobacteria (PGPR) improve plant health under various biotic and abiotic stresses. However, the underlying mechanisms of the protective effects of PGPR in deficit water stress (WS) remain less explored. This study aimed to characterize the role of Ochrobactrum sp. NBRISH6 inoculation on maize (Zea mays “Maharaja”) under WS conditions using multiple approaches such as phys…	Accepted
APX' + 'gene expression'+ 'abiotic stress' + ' plants'+ 'PGPR'	Google scholar	Plant growth promoting bacteria for combating salinity stress in plants – Recent developments and prospects: A review	Mishra et al., 2021	Soil salinity has emerged as a great threat to the agricultural ecosystems throughout the globe. Many continents of the globe are affected by salinity and crop productivity is severely affected. Anthropogenic activities leading to the degradation of agricultural land have also accelerated the rate of salinization in arid and semi-arid regions. Several approaches are being evaluated for remediatin…	Rejected	Review
APX' + 'gene expression'+ 'abiotic stress' + ' plants'+ 'PGPR'	Google scholar	Demonstrating the potential of abiotic stress-tolerant Jeotgalicoccus huakuii NBRI 13E for plant growth promotion and salt stress amelioration	Misra et al., 2019	The present study aimed to demonstrate the potential of abiotic stress-tolerant Jeotgalicoccus huakuii NBRI 13E for plant growth promotion and salt stress amelioration. NBRI 13E was characterized for abiotic stress tolerance and plant growth-promoting (PGP) attributes under normal and salt stress conditions. Phylogenetic comparison of NBRI 13E was carried out with known species of the same genera…	Rejected	Proteomic study
APX' + 'gene expression'+ 'abiotic stress' + ' plants'+ 'PGPR'	Google scholar	Salinity Stress: Toward Sustainable Plant Strategies and Using Plant Growth-Promoting Rhizobacteria Encapsulation for Reducing It	Riseh et al., 2021	Salinity is one of the most important abiotic stresses that influences plant growth and productivity worldwide. Salinity affects plant growth by ionic toxicity, osmotic stress, hormonal imbalance, nutrient mobilization reduction, and reactive oxygen species (ROS). To survive in saline soils, plants have developed various physiological and biochemical strategies such as ion exchange, activation of…	Rejected	Review
APX' + 'gene expression'+ 'abiotic stress' + ' plants'+ 'PGPR'	Google scholar	Plant Growth-Promoting Bacteria: Biological Tools for the Mitigation of Salinity Stress in Plants.	Kumar et al., 2020	Salinity stress is one of the major abiotic stresses threatening sustainable crop production worldwide. The extent of salinity affected area is expected to cover about 50% of total agricultural land by 2050. Salinity stress produces various detrimental effects on plants’ physiological, biochemical, and molecular features and reduces productivity. The poor plant growth under salinity stress is due…	Rejected	Review
APX' + 'gene expression'+ 'abiotic stress' + ' plants'+ 'PGPR'	Google scholar	A novel PGPR strain Kocuria rhizophila Y1 enhances salt stress tolerance in maize by regulating phytohormone levels, nutrient acquisition, redox potential, ion homeostasis, photosynthetic capacity and stress-responsive genes expression	Li et al., 2020	High salinity is harmful for crop physiology and yield. Accumulating evidences indicate that plant growth promoting rhizobacteria (PGPR) can enhance crop growth and reduce the negative impacts of salt stress through regulation of some molecular, biochemical and physiological features. In the present study, a novel halo-tolerant strain Y1 was isolated from maize rhizosphere soil. Sequence analysis…	Rejected	No drought stress
APX' + 'gene expression'+ 'abiotic stress' + ' plants'+ 'PGPR'	Google scholar	Over-expression of L-gulono-γ-lactone oxidase (GLOase) gene leads to ascorbate accumulation with enhanced abiotic stress tolerance in tomato	Lim et al., 2012	Vitamin C (ascorbic acid, AsA) is an essential component for collagen biosynthesis and also for correct functioning of the cardiovascular system in humans. Plants and several animals can synthesize ascorbic acid, whereas humans lack the gene essential for ascorbic acid biosynthesis and must acquire the vitamin from their diet. In the present study, we developed a transgenic tomato plant (Lycopers…	Rejected	No PGPR
APX' + 'gene expression'+ 'abiotic stress' + ' plants'+ 'PGPR'	Google scholar	Beneficial rhizobacteria from rice rhizosphere confers high protection against biotic and abiotic stress inducing systemic resistance in rice seedlings	Lucas et al., 2014	The present study reports a screening for PGPR in a highly selective environment, the rhizosphere of rice plants, in southwestern of Spain. Among the 900 isolates, only 38% were positive for at least one of the biochemical activities to detect putative PGPR. The best 80 isolates were selected and identified by 16S rRNA partial sequencing. Among these, 13 strains were selected for growth promotion…	Rejected	Proteomic study
APX' + 'gene expression'+ 'abiotic stress' + ' plants'+ 'PGPR'	Google scholar	Extracts from cultures of Pseudomonas fluorescens induce defensive patterns of gene expression and enzyme activity while depressing visible injury and reactive oxygen species in Arabidopsis thaliana challenged with pathogenic Pseudomonas syringae	Martin-Rivilla et al., 2019	We evaluated the ability of metabolic elicitors extracted from Pseudomonas fluorescens N21.4 to induce systemic resistance (ISR) in Arabidopsis thaliana against the pathogen Pseudomonas syringae DC3000. Metabolic elicitors were obtained from bacteria-free culture medium with n-hexane, ethyl acetate and n-butanol in three consecutive extractions. Each extract showed plant protection activity. The …	Rejected	Biotic stress
APX' + 'gene expression'+ 'abiotic stress' + ' plants'+ 'PGPR'	Google scholar	Biostimulants for Plant Growth and Mitigation of Abiotic Stresses: A Metabolomics Perspective	Nephali et al., 2020	Adverse environmental conditions due to climate change, combined with declining soil fertility, threaten food security. Modern agriculture is facing a pressing situation where novel strategies must be developed for sustainable food production and security. Biostimulants, conceptually defined as non-nutrient substances or microorganisms with the ability to promote plant growth and health, represen…	Rejected	Review
APX' + 'gene expression'+ 'abiotic stress' + ' plants'+ 'PGPR'	Google scholar	Bacterial-mediated drought tolerance: Current and future prospects	Ngumbi et al., 2016	With ongoing climate change, the severity, frequency and duration of drought in cotton (Gossypium hirsutum L.), soybean (Glycine max L.), and corn (Zea mays L.) producing areas around the world are predicted to increase. Plants’ tolerance to drought stress needs to be improved in order to allow growth of crops that satisfy food demands under limited water resource availability. Plant-associated m…	Rejected	Review
APX' + 'gene expression'+ 'abiotic stress' + ' plants'+ 'PGPR'	Google scholar	Effects of plant growth-promoting rhizobacteria on the molecular responses of maize under drought and heat stresses: A review	NOTUNUNU et al., 2021	Drought and heat are major environmental stresses that continually influence plant growth and development. Under field conditions, these stresses occur more frequently in combination than alone, which magnifies corresponding detrimental effects on the growth and productivity of agriculturally important crops. Plant responses to such abiotic stresses are quite complex and manifested in a range of …	Rejected	Review
APX' + 'gene expression'+ 'abiotic stress' + ' plants'+ 'PGPR'	Google scholar	Antioxidant gene expression analysis and evaluation of total phenol content and oxygen-scavenging system in tea accessions under normal and drought stress conditions	Rahimi et al., 2021	Background: Abiotic and biotic stresses induce oxidative processes in plant cells that this process starts with the production of ROSs which cause damage to the proteins. Therefore, plants have increased their antioxidant activity to defend against this oxidative stress to be able to handle stress better. In this research, 14 different tea accessions in a randomized complete block design with two…	Accepted
APX' + 'gene expression'+ 'abiotic stress' + ' plants'+ 'PGPR'	Google scholar	Silicon-mediated abiotic and biotic stress mitigation in plants: Underlying mechanisms and potential for stress resilient agriculture	Ranjan et al., 2021	Silicon (Si) is a beneficial macronutrient for plants. The Si supplementation to growth media mitigates abiotic and biotic stresses by regulating several physiological, biochemical and molecular mechanisms. The uptake of Si from the soil by root cells and subsequent transport are facilitated by Lsi1 (Low silicon1) belonging to nodulin 26-like major intrinsic protein (NIP) subfamily of aquaporin p…	Rejected	Review
APX' + 'gene expression'+ 'abiotic stress' + ' plants'+ 'PGPR'	Google scholar	Enhancement of salt tolerance in maize (Zea mays L.) using locally isolated Bacillus sp. SR-2-1/1	Rafiq et al., 2020	The current study was aimed at enhancement of salt tolerance of maize by using a halotolerant plant growth promoting rhizobacterium. Maize seeds (FH-1137) were grown under salt stress with and without inoculation of a locally isolated Bacillus sp. SR-2-1/1. Inoculation of Bacillus sp. SR-2-1/1 significantly augmented the salt tolerance of maize plants which was reflected by increased contents of …	Rejected	No drought stress
APX' + 'gene expression'+ 'abiotic stress' + ' plants'+ 'PGPR'	Google scholar	The Role of Plant Growth Promoting Rhizosphere Microbiome as Alternative Biofertilizer in Boosting Solanum melongena L. Adaptation to Salinity Stress	Mokabel et al., 2022	Recent ecological perturbations are presumed to be minimized by the application of biofertilizers as a safe alternative to chemical fertilizers. The current study aims to use bioinoculum (I) as an alternative biofertilizer and to alleviate salinity stress in the cultivar Solanum melongena L. Baldi. The salinity drench was 200 mM NaCl (S), which was used with different treatments (0; I; S; S + I) …	Rejected	No drought stress
APX' + 'gene expression'+ 'abiotic stress' + ' plants'+ 'PGPR'	Google scholar	Bio-prospecting of ACC deaminase producing Rhizobacteria towards sustainable agriculture: A special emphasis on abiotic stress in plants	Murali et al., 2021	In agriculture, eco-friendly management practices worldwide are required to enhance food security under the changing agro-climatic environmental conditions with avoiding the use of harmful chemicals. Plant growth promoting rhizobacteria (PGPR) is a group of soil microbes closely associated with roots and capable of improving plant growth. 1-Aminocyclopropane-1-carboxylic acid (ACC) deaminase prod…	Rejected	Review
APX' + 'gene expression'+ 'abiotic stress' + ' plants'+ 'PGPR'	Google scholar	Induction of drought tolerance in Pennisetum glaucum by ACC deaminase producing PGPR- Bacillus amyloliquefaciens through Antioxidant defense system	Murali et al., 2021	Rhizobacteria from pearl millet were screened to produce 1-aminocyclopropane-1-carboxylate (ACC) deaminase and to evaluate its role in alleviating drought stress. Amongst 96 isolates, 28 were positive for ACC deaminase production, with MMR04 offering maximum activity of 2196.23 nmol of α-ketobutyrate produced mg–1 of protein h–1. The ACC deaminase producing rhizobacteria with multiple beneficial …	Accepted
APX' + 'gene expression'+ 'abiotic stress' + ' plants'+ 'PGPR'	Google scholar	Induction of drought tolerance in Pennisetum glaucum by ACC deaminase producing PGPR- Bacillus amyloliquefaciens through Antioxidant defense system	Murali et al., 2021		Rejected	Duplicate
APX' + 'gene expression'+ 'abiotic stress' + ' plants'+ 'PGPR'	Google scholar	Interaction between arbuscular mycorrhizal fungi and Bacillus spp. in soil enhancing growth of crop plants	Nanjundappa et al., 2019	Soil microorganisms play an important role in enhancing soil fertility and plant health. Arbuscular mycorrhizal fungi and plant growth promoting rhizobacteria form a key component of the soil microbial population. Arbuscular mycor- rhizal fungi form symbiotic association with most of the cultivated crop plants and they help plants in phosphorus nutrition and protecting them against biotic and abi…	Rejected	Review
APX' + 'gene expression'+ 'abiotic stress' + ' plants'+ 'PGPR'	Google scholar	The expression of proline production/degradation genes under salinity and cadmium stresses in Triticum aestivum inoculated with Pseudomonas sp.	Shavalikohshori et al., 2020	Soil pollution with heavy metals (such as Cd) and soil salinity are two important problems concerning the agricultural production with negative effect on crop quantity and quality in many parts of the world. Current research evaluated the expression of production/degradation genes in Triticum aestivum var. ‘Chamran’ inoculated with Pseudomonas sp. and exposed it to salinity (EC = 3, 10, and 16 dS…	Rejected	No drought stress
APX' + 'gene expression'+ 'abiotic stress' + ' plants'+ 'PGPR'	Google scholar	Pseudomonas simiae augments the tolerance to alkaline bauxite residue in Atriplex canescens by modulating photosynthesis, antioxidant defense enzymes, and compatible osmolytes	Shi et al., 2022	In situ revegetation is effective in improving water-stable aggregation, preserving structural stability, and decreasing ground- water pollution to reduce the environmental risks posed by alkaline bauxite residue (ABR). Pseudomonas simiae, a plant growth-promoting rhizobacteria (PGPR), was used to promote Atriplex canescens growth challenged by ABR. The mecha- nism of P. simiae-induced plant grow…	Rejected	Proteomic study
APX' + 'gene expression'+ 'abiotic stress' + ' plants'+ 'PGPR'	Google scholar	Soil salinity: A serious environmental issue and plant growth promoting bacteria as one of the tools for its alleviation	Shrivastava et al., 2015	Salinity is one of the most brutal environmental factors limiting the productivity of crop plants because most of the crop plants are sensitive to salinity caused by high concentrations of salts in the soil, and the area of land affected by it is increasing day by day. For all important crops, aver- age yields are only a fraction – somewhere between 20% and 50% of record yields; these losses are …	Rejected	Review
APX' + 'gene expression'+ 'abiotic stress' + ' plants'+ 'PGPR'	Google scholar	Endophytic Streptomyces spp. underscore induction of defense regulatory genes and confers resistance against Sclerotium rolfsii in chickpea	Singh et al., 2017	This study evaluated the potential of endophytic Streptomyces spp. viz., S. diastaticus, S. fradiae, S. olivochromogenes, S. collinus, S. ossamyceticus, and S. griseus to trigger systemic resistance and mitigate oxidative stress in chickpea against Sclerotium rolfsii. The role of endophytes stimulating systemic resis- tance was evaluated by seed treatments in pathogen inoculated chickpea. Substan…	Rejected	Biotic stress
APX' + 'gene expression'+ 'abiotic stress' + ' plants'+ 'PGPR'	Google scholar	Microbially Mediated Plant Salt Tolerance and Microbiome-based Solutions for Saline Agriculture	Qin et al., 2016	Soil salinization adversely affects plant growth and has become one of the major limiting factors for crop produc- tivity worldwide. The conventional approach, breeding salt-tolerant plant cultivars, has often failed to efficiently alleviate the situation. In contrast, the use of a diverse array of microorganisms harbored by plants has attracted increasing attention because of the remarkable bene…	Rejected	Review
APX' + 'gene expression'+ 'abiotic stress' + ' plants'+ 'PGPR'	Google scholar	A multifaceted rhizobacterium Bacillus licheniformis functions as a fungal antagonist and a promoter of plant growth and abiotic stress tolerance	Sukkasem et al., 2018	Plant-growth-promoting rhizobacteria play a beneficial role in plant growth through various mechanisms. In this study, an isolated rhizobacterial strain, Bacillus licheniformis CH102 (hereafter CH102), exhibited antifungal activity and harbored genes required for lantibiotic and 2,3-butanediol production. In Arabidopsis, increased root hair number and fresh weight were obtained in the CH102-inocu…	Accepted
APX' + 'gene expression'+ 'abiotic stress' + ' plants'+ 'PGPR'	Google scholar	Microbial trehalose boosts the ecological fitness of biocontrol agents, the viability of probiotics during long-term storage and plants tolerance to environmental-driven abiotic stress	Onwe et al., 2022	Despite the impressive gain in agricultural production and greater availability of food, a large portion of the world population is affected by food shortages and nutritional imbalance. This is due to abiotic stresses encountered by plants as a result of environmental-driven perturbations, loss of viability of starter cultures (probiotics) for func- tional foods during storage as well as the vuln…	Rejected	Review
APX' + 'gene expression'+ 'abiotic stress' + ' plants'+ 'PGPR'	Google scholar	The role of biostimulants and bioeffectors as alleviators of abiotic stress in crop plants	Oosten et al., 2017	The use of bioeffectors, formally known as plant biostimulants, has become common practice in agriculture and provides a number of benefits in stimulating growth and protecting against stress. A biostimulant is loosely defined as an organic material and/or microorganism that is applied to enhance nutrient uptake, stimulate growth, enhance stress tolerance or crop quality. This review is intended …	Rejected	Review
APX' + 'gene expression'+ 'abiotic stress' + ' plants'+ 'PGPR'	Google scholar	Burkholderia phytofirmans PsJN induces long-term metabolic and transcriptional changes involved in Arabidopsis thaliana salt tolerance	Pinedo et al., 2015	Salinity is one of the major limitations for food production worldwide. Improvement of plant salt-stress tolerance using plant-growth promoting rhizobacteria (PGPR) has arisen as a promising strategy to help overcome this limitation. However, the molecular and biochemical mechanisms controlling PGPR/plant interactions under salt-stress remain unclear. The main objective of this study was to obtai…	Rejected	No drought stress
APX' + 'gene expression'+ 'abiotic stress' + ' plants'+ 'PGPR'	Google scholar	Effect of plant growth promoting Pseudomonas spp. on compatible solutes, antioxidant status and plant growth of maize under drought stress	Sandhya et al., 2010	Drought is one of the major abiotic stresses affecting yield of dryland crops. Rhizobacterial populations of stressed soils are adapted and tolerant to stress and can be screened for isolation of efficient stress adaptive/toler- ant, plant growth promoting rhizobacterial (PGPR) strains that can be used as inoculants for crops grown in stressed ecosystems. The effect of inoculation of five drought…	Rejected	Proteomic study
APX' + 'gene expression'+ 'abiotic stress' + ' plants'+ 'PGPR'	Google scholar	Plant Growth Promoting Rhizobacteria Protect Wheat Plants Against Temperature Stress Through Antioxidant Signalling and Reducing Chloroplast and Membrane Injury	Sarkar et al., 2018	In India and other tropics, wheat plants suffer from exposure to high temperature with heat increase above 35 °C causing stress-like conditions. Hence, the present study was aimed to determine a means of suitable eco-friendly temperature stress alleviation for growth of wheat. Seeds of two wheat (Triticum aestivum L.) cultivars were primed with two potential plant growth promoting rhizobacteria (…	Rejected	Proteomic study
APX' + 'gene expression'+ 'abiotic stress' + ' plants'+ 'PGPR'	Google scholar	High-temperature resilience in Bacillus safensis primed wheat plants: A study of dynamic response associated with modulation of antioxidant machinery, differential expression of HSPs and osmolyte biosynthesis	Sarkar et al., 2021	Changing climate scenario is posing a major threat to agricultural sector worldwide. Wheat, a weather sensitive crop, is envisaged to face significant yield loss in coming decades due to accelerating global average temperature. In recent years Plant Growth Promoting Bacteria (PGPR) have been successfully used in sustainable crop improvement programme and abiotic stress alleviation. However, PGPR …	Rejected	Proteomic study
APX' + 'gene expression'+ 'abiotic stress' + ' plants'+ 'PGPR'	Google scholar	High-temperature resilience in Bacillus safensis primed wheat plants: A study of dynamic response associated with modulation of antioxidant machinery, differential expression of HSPs and osmolyte biosynthesis	Sarkar et al., 2021		Rejected	Duplicate
APX' + 'gene expression'+ 'abiotic stress' + ' plants'+ 'PGPR'	Google scholar	A Review on the Role of Endophytes and Plant Growth Promoting Rhizobacteria in Mitigating Heat Stress in Plants	Shaffique et al., 2022	Among abiotic stresses, heat stress is described as one of the major limiting factors of crop growth worldwide, as high temperatures elicit a series of physiological, molecular, and biochemical cascade events that ultimately result in reduced crop yield. There is growing interest among re- searchers in the use of beneficial microorganisms. Intricate and highly complex interactions between plants …	Rejected	Review
APX' + 'gene expression'+ 'abiotic stress' + ' plants'+ 'PGPR'	Google scholar	Halotolerant Rhizobacteria Promote Growth and Enhance Salinity Tolerance in Peanut	Sharma et al., 2016	Use of Plant growth promoting rhizobacteria (PGPR) is a promising strategy to improve the crop production under optimal or sub-optimal conditions. In the present study, five diazotrophic salt tolerant bacteria were isolated from the roots of a halophyte, Arthrocnemum indicum. The isolates were partially characterized in vitro for plant growth promoting traits and evaluated for their potential to …	Rejected	No drought stress
APX' + 'gene expression'+ 'abiotic stress' + ' plants'+ 'PGPR'	Google scholar	prescience of endogenous regulation in Arabidopsis thaliana by Pseudomonas putida MTCC 5279 under phosphate starved salinity stress condition	Srivastava et al., 2020	phosphorus (p) availability and salinity stress are two major constraints for agriculture productivity. A combination of salinity and p starvation is known to be more deleterious to plant health. plant growth promoting rhizobacteria are known to ameliorate abiotic stress in plants by increasing the availability of different nutrients. However, interaction mechanisms of plant grown under salinity …	Rejected	Proteomic study
APX' + 'gene expression'+ 'abiotic stress' + ' plants'+ 'PGPR'	Google scholar	Biofilms Positively Contribute to Bacillus amyloliquefaciens 54-induced Drought Tolerance in Tomato Plants	Wang et al., 2019	Drought stress is a major obstacle to agriculture. Although many studies have reported on plant drought tolerance achieved via genetic modification, application of plant growth-promoting rhizobacteria (PGPR) to achieve tolerance has rarely been studied. In this study, the ability of three isolates, including Bacillus amyloliquefaciens 54, from 30 potential PGPR to induce drought tolerance in toma…	Rejected	Proteomic study
APX' + 'gene expression'+ 'abiotic stress' + ' plants'+ 'PGPR'	Google scholar	Stage-dependent concomitant microbial fortification improves soil nutrient status, plant growth, antioxidative defense system and gene expression in rice	Singh et al., 2020	Stage-dependent concomitant fortification of rice (Oryza sativa L.) varieties PB1612 and CO51 with microbial inoculants Trichoderma asperellum and Pseudomonas fluorescens as seed coating, seedling root inoculation and soil application enhanced growth, activated antioxidant enzymes and modulated defence-related genes in plants. Microbial inoculants improved shoot height, tiller numbers, fresh weig…	Rejected	No drought stress
APX' + 'gene expression'+ 'abiotic stress' + ' plants'+ 'PGPR'	Google scholar	Microbial inoculation in rice regulates antioxidative reactions and defense related genes to mitigate drought stress	Singh et al., 2020	Microbial inoculation in drought challenged rice triggered multipronged steps at enzymatic, non- enzymatic and gene expression level. these multifarious modulations in plants were related to stress tolerance mechanisms. Drought suppressed growth of rice plants but inoculation with Trichoderma, Pseudomonas and their combination minimized the impact of watering regime. induced PAL gene expression a…	accepted
APX' + 'gene expression'+ 'abiotic stress' + ' plants'+ 'PGPR'	Google scholar	Transcriptomic profiling of maize (Zea mays L.) seedlings in response to Pseudomonas putida stain FBKV2 inoculation under drought stress	SkZ et al., 2018	Several mechanisms have been proposed for plant growth-promoting rhizobacteria (PGPR)-mediated drought stress tolerance in plants, but little is known about the molecular pathways involved in the drought tolerance promoted by PGPR. We, therefore, aim to study the differential gene response between Pseudomonas putida strain FBKV2 and maize interaction under drought stress using Illumina sequencing…	Rejected	Review
APX' + 'gene expression'+ 'abiotic stress' + ' plants'+ 'PGPR'	Google scholar	Ascorbate Peroxidase and Catalase Activities and Their Genetic Regulation in Plants Subjected to Drought and Salinity Stresses	Sofo et al., 2015	Hydrogen peroxide (H2O2), an important relatively stable non-radical reactive oxygen species (ROS) is produced by normal aerobic metabolism in plants. At low concentrations, H2O2 acts as a signal molecule involved in the regulation of specific biological/physiological processes (photosynthetic functions, cell cycle, growth and development, plant responses to biotic and abiotic stresses). Oxidativ…	Rejected	Review
APX' + 'gene expression'+ 'abiotic stress' + ' plants'+ 'PGPR'	Google scholar	Unraveling Aspects of Bacillus amyloliquefaciens Mediated Enhanced Production of Rice under Biotic Stress of Rhizoctonia solani	Srivastava et al., 2016	Rhizoctonia solani is a necrotrophic fungi causing sheath blight in rice leading to substantial loss in yield. Excessive and persistent use of preventive chemicals raises human health and environment safety concerns. As an alternative, use of biocontrol agents is highly recommended. In the present study, an abiotic stress tolerant, plant growth promoting rhizobacteria Bacillus amyloliquefaciens (…	Rejected	Biotic stress
APX' + 'gene expression'+ 'abiotic stress' + ' plants'+ 'PGPR'	Google scholar	Halotolerant plant-growth promoting rhizobacteria modulate gene expression and osmolyte production to improve salinity tolerance and growth in Capsicum annum L.	Yasin et al., 2018	Some rhizobacteria have demonstrated a noteworthy role in regulation of plant growth and biomass production under biotic and abiotic stresses. The present study was intended to explicate the ameliorative consequences of halotolerant plant growth- promoting rhizobacteria (HPGPR) on growth of capsicum plants subjected to salt stress. Salt stress was ascertained by supplementing 1 and 2 g NaCl kg−1 …	Rejected	No APX
APX' + 'gene expression'+ 'abiotic stress' + ' plants'+ 'PGPR'	Google scholar	PGPR strain Paenibacillus polymyxa SQR-21 potentially benefits watermelon growth by re-shaping root protein expression	E et al., 2017	Paenibacillus polymyxa (SQR-21) is not only a plant growth-promoting rhizobacteria, but also an effective biocontrol agent against Fusarium wilt disease of watermelon. For the better understanding and clarifying the potential mecha- nisms of SQR-21 to improve watermelon growth and disease resistance, a split-root methodology in hydroponic and LC–MS technology with the label free method was used t…	Rejected	No abiotic stress
APX' + 'gene expression'+ 'abiotic stress' + ' plants'+ 'PGPR'	Google scholar	Effect of UV-B priming on the abiotic stress tolerance of stress-sensitive rice seedlings: Priming imprints and cross-tolerance	Thomas et al., 2020	Ultraviolet (UV)–B priming can boost the abiotic stress tolerance of plants by activating stress-responsive pathways. The main objective of the present study was to investigate the persistence of priming imprints and cross-tolerance inducing effects of UV-B priming in abiotic stress-sensitive rice (Oryza sativa L. ‘Aiswarya’) when subjected to various abiotic stressors (NaCl, PEG, and UV-B). The …	Rejected	No drought stress
APX' + 'gene expression'+ 'abiotic stress' + ' plants'+ 'PGPR'	Google scholar	Pseudomonas putida attunes morphophysiological, biochemical and molecular responses in Cicer arietinum L. during drought stress and recovery	Tiwari et al., 2016	Drought is one of the most important abiotic stresses that adversely affect plant growth and yield po- tential. However, some drought resistant rhizosphere competent bacteria are known to improve plant health and promote growth during abiotic stresses. Present study showed the role of Pseudomonas putida MTCC5279 (RA) in ameliorating drought stress on cv. BG-362 (desi) and cv. BG-1003 (kabuli) chi…	Accepted
APX' + 'gene expression'+ 'abiotic stress' + ' plants'+ 'PGPR'	Google scholar	Induction of Drought Tolerance in Cucumber Plants by a Consortium of Three Plant Growth-Promoting Rhizobacterium Strains	Wang et al., 2012	Our previous work showed that a consortium of three plant growth-promoting rhizobacterium (PGPR) strains (Bacillus cereus AR156, Bacillus subtilis SM21, and Serratia sp. XY21), termed as BBS for short, was a promising biocontrol agent. The present study investigated its effect on drought tolerance in cucumber plants. After withholding watering for 13 days, BBS- treated cucumber plants had much da…	Accepted
APX' + 'gene expression'+ 'abiotic stress' + ' plants'+ 'PGPR'	Google scholar	A Consortium of Three Plant Growth-Promoting Rhizobacterium Strains Acclimates Lycopersicon esculentum and Confers a Better Tolerance to Chilling Stress	Wang et al., 2016	Using beneficial microorganisms has emerged as a potential new solution to induce resistance to biotic and abiotic stress tolerance in several plant species. BBS is a consortium of three plant growth-promoting rhizobac- terium (PGPR) strains (Bacillus cereus AR156, B. subtilis SM21, and Serratia sp. XY21) we screened for soil-borne disease control and registered as a biofertilizer that was recent…	Rejected	No drought stress
APX' + 'gene expression'+ 'abiotic stress' + ' plants'+ 'PGPR'	Google scholar	Microbial Interventions in Agriculture and Environment	Ansari et al., 2019		Rejected	Book
APX' + 'gene expression'+ 'abiotic stress' + ' plants'+ 'PGPR'	Google scholar	Plant Growth Promoting Rhizobacteria for Sustainable Stress Management	Kour et al., 2016		Rejected	Book
APX' + 'gene expression'+ 'abiotic stress' + ' plants'+ 'PGPR'	Google scholar	Plant Growth Regulators Signalling Under Stress Conditions	Zaid et al., 2021		Rejected	Book
APX' + 'gene expression'+ 'abiotic stress' + ' plants'+ 'PGPR'	Google scholar	Microbiome in Plant Health and Disease	Eid et al., 2019		Rejected	Book
APX' + 'gene expression'+ 'abiotic stress' + ' plants'+ 'PGPR'	Google scholar	Agriculturally Important Fungi for Sustainable Agriculture	Tiwari et al., 2020		Rejected	Book
APX' + 'gene expression'+ 'abiotic stress' + ' plants'+ 'PGPR'	Google scholar	Biofertilizers for Sustainable Agriculture and Environment	Jha et al., 2019		Rejected	Book
APX' + 'gene expression'+ 'abiotic stress' + ' plants'+ 'PGPR'	Google scholar	Saline Soil-based Agriculture by Halotolerant Microorganisms	Bensidhoum et al., 2019		Rejected	Book
APX' + 'gene expression'+ 'abiotic stress' + ' plants'+ 'PGPR'	Google scholar	Sustainable Development and Biodiversity	Odoh et al., 2020		Rejected	Book
APX' + 'gene expression'+ 'abiotic stress' + ' plants'+ 'PGPR'	Google scholar	Microbes and Signaling Biomolecules Against Plant Stress	Maithani et al., 2021		Rejected	Book
APX' + 'gene expression'+ 'abiotic stress' + ' plants'+ 'PGPR'	Google scholar	Microorganisms in Saline Environments: Strategies and Functions	Bensidhoum et al., 2019		Rejected	Book
APX' + 'gene expression'+ 'abiotic stress' + ' plants'+ 'PGPR'	Google scholar	Microorganisms in Saline Environments: Strategies and Functions	Kumari et al., 2019		Rejected	Book
APX' + 'gene expression'+ 'abiotic stress' + ' plants'+ 'PGPR'	Google scholar	Microbial Interventions in Agriculture and Environment	Kashyap et al., 2019		Rejected	Book
APX' + 'gene expression'+ 'abiotic stress' + ' plants'+ 'PGPR'	Google scholar	Plant Abiotic Stress Tolerance	Nafees et al., 2019		Rejected	Book
APX' + 'gene expression'+ 'abiotic stress' + ' plants'+ 'PGPR'	Google scholar	The Plant Family Brassicaceae Biology and Physiological Responses to Environmental Stresses	Bhuyan et al., 2020		Rejected	Book
APX' + 'gene expression'+ 'abiotic stress' + ' plants'+ 'PGPR'	Google scholar	Rhizosphere Microbes Soil and Plant Functions	Bodhankar et al., 2020		Rejected	Book
APX' + 'gene expression'+ 'abiotic stress' + ' plants'+ 'PGPR'	Google scholar	Portraying Rhizobacterial Mechanisms in Drought Tolerance: A Way Forward Toward Sustainable Agriculture	Kaushal, 2019		Rejected	Chapter book
APX' + 'gene expression'+ 'abiotic stress' + ' plants'+ 'PGPR'	Google scholar	Roles of Plant Growth-Promoting Rhizobacteria (PGPR) in Stimulating Salinity Stress Defense in Plants: A Review	Ha-Tran et al., 2021	To date, soil salinity becomes a huge obstacle for food production worldwide since salt stress is one of the major factors limiting agricultural productivity. It is estimated that a significant loss of crops (20–50%) would be due to drought and salinity. To embark upon this harsh situation, numerous strategies such as plant breeding, plant genetic engineering, and a large variety of agri- cultura…	Rejected	Review
APX' + 'gene expression'+ 'abiotic stress' + ' plants'+ 'PGPR'	Google scholar	Hot and dry: how plants can thrive in future climates	Siddiqui et al., 2022		Rejected	Incomplete article
APX' + 'gene expression'+ 'abiotic stress' + ' plants'+ 'PGPR'	Google scholar	Mechanisms of microbes to combat salinity in soil by producing secondary metabolites	Mahmood et al., 2022	The biotic and abiotic stresses can affect all the living organisms including plants and microorganisms both positively and negatively. These stresses might include salinity, temperature intolerance, plants parasites, etc. However, few microbes play positive role in combating these environmental stresses by certain mechanisms. They overcome these burdens by displaying certain metabolic activities…	rejected	Review
APX' + 'gene expression'+ 'abiotic stress' + ' plants'+ 'PGPR'	Google scholar	Karrikin Improves Osmotic and Salt Stress Tolerance via the Regulation of the Redox Homeostasis in the Oil Plant Sapium sebiferum	Shah et al., 2020	Karrikins are reported to stimulate seed germination, regulate seedling growth, and increase the seedling vigor in abiotic stress conditions in plants. Nevertheless, how karrikins alleviate abiotic stress remains largely elusive. In this study, we found that karrikin (KAR1) could significantly alleviate both drought and salt stress in the important oil plant Sapium sebiferum. KAR1 supplementation…	Rejected	No PGPR
APX' + 'gene expression'+ 'abiotic stress' + ' plants'+ 'PGPR'	Google scholar	Rhizobacteriome: Promising Candidate for Conferring Drought Tolerance in Crops	Yadav et al., 2019	Drought is a global water shortage problem which poses challenge to crop productivity. Novel strategies are being tried to find out solution to sustain agriculture under drought conditions. Rhizobacteriome is an exclusive genetic material of bacteria resident to rhizosphere plays critical role to health and yield of plant. The interaction of rhizobacteriome with plant provides basis for protectin…	Rejected	Review
APX' + 'gene expression'+ 'abiotic stress' + ' plants'+ 'PGPR'	Google scholar	Bacillus siamensis Reduces Cadmium Accumulation and Improves Growth and Antioxidant Defense System in Two Wheat (Triticum aestivum L.) Varieties	Awan et al., 2020	Bioavailability of cadmium (Cd) metal in the soils due to the scarcity of good quality water and industrial waste could be the major limiting factor for the growth and yield of crops. Therefore, there is a need for a prompt solution to the Cd toxicity, to fulfill increasing food demand resulting from growing world population. Today, a variable range of plant growth promoting rhizobacteria (PGPR) …	Rejected	Proteomic study
APX' + 'gene expression'+ 'abiotic stress' + ' plants'+ 'PGPR'	Google scholar	A bZIP transcription factor VabZIP12 from blueberry induced by dark septate endocyte improving the salt tolerance of transgenic Arabidopsis	Qu et al., 2022	Dark septate endophytes (DSEs) have attracted much attention due to their positive roles in plant growth as well as resistance to various abiotic stresses. However, there are no reports on the molecular mechanisms of DSE fungi to improve salt tolerance in plants. In this study, the blueberry seedlings inoculated with T010, a beneficial DSE fungus reported previously, grew more vigorously than the…	Rejected	Fungi
APX' + 'gene expression'+ 'abiotic stress' + ' plants'+ 'PGPR'	Google scholar	A unified mechanism of action for volatile isoprenoids in plant abiotic stress	Vickers et al., 2009	The sessile nature of plants has resulted in the evolution of an extraordinarily diverse suite of protective mechanisms against biotic and abiotic stresses. Though volatile isoprenoids are known to be involved in many types of biotic interactions, they also play important but relatively unappreciated roles in abiotic stress responses. We review those roles, discuss the proposed mechanistic explan…	Rejected	Review
APX' + 'gene expression'+ 'abiotic stress' + ' plants'+ 'PGPR'	Google scholar	Interactive Role of Silicon and Plant–Rhizobacteria Mitigating Abiotic Stresses: A New Approach for Sustainable Agriculture and Climate Change	Verma et al., 2020	Abiotic stresses are the major constraints in agricultural crop production across the globe. The use of some plant–microbe interactions are established as an environment friendly way of enhancing crop productivity, and improving plant development and tolerance to abiotic stresses by direct or indirect mechanisms. Silicon (Si) can also stimulate plant growth and mitigate environmental stresses, an…	Rejected	Review
APX' + 'gene expression'+ 'abiotic stress' + ' plants'+ 'PGPR'	Google scholar	Phytohormones and induction of plant-stress tolerance and defense genes by seed and foliar inoculation with Azospirillum brasilense cells and metabolites promote maize growth	Fukami et al., 2017	Azospirillum spp. are plant-growth-promoting bacteria used worldwide as inoculants for a variety of crops. Among the beneficial mechanisms associated with Azospirillum inoculation, emphasis has been given to the biological nitrogen fixation process and to the synthesis of phytohormones. In Brazil, the application of inoculants containing A. brasilense strains Ab-V5 and Ab-V6 to cereals is exponen…	Rejected	No drought stress
APX' + 'gene expression'+ 'abiotic stress' + ' plants'+ 'PGPR'	Google scholar	Bacterial Plant Biostimulants: A Sustainable Way towards Improving Growth, Productivity, and Health of Crops	Hamid et al., 2021	This review presents a comprehensive and systematic study of the field of bacterial plant biostimulants and considers the fundamental and innovative principles underlying this technology. Plant biostimulants are an important tool for modern agriculture as part of an integrated crop man- agement (ICM) system, helping make agriculture more sustainable and resilient. Plant biostimulants contain subs…	Rejected	Review
APX' + 'gene expression'+ 'abiotic stress' + ' plants'+ 'PGPR'	Google scholar	Mechanistic Insights of Plant Growth Promoting Bacteria Mediated Drought and Salt Stress Tolerance in Plants for Sustainable Agriculture	Gupta et al., 2022	Climate change has devastating effects on plant growth and yield. During ontogenesis, plants are subjected to a variety of abiotic stresses, including drought and salinity, affecting the crop loss (20–50%) and making them vulnerable in terms of survival. These stresses lead to the excessive production of reactive oxygen species (ROS) that damage nucleic acid, proteins, and lipids. Plant growth-pr…	Rejected	Review
APX' + 'gene expression'+ 'abiotic stress' + ' plants'+ 'PGPR'	Google scholar	Siderophore-producing rhizobacteria reduce heavy metal-induced oxidative stress in Panax ginseng Meyer	Huo et al., 2021	Background: Panax ginseng is one of the most important medicinal plants and is usually harvested after 5 to 6 years of cultivation in Korea. Heavy metal (HM) exposure is a type of abiotic stress that can induce oxidative stress and decrease the quality of the ginseng crop. Siderophore-producing rhizobacteria (SPR) may be capable of bioremediating HM contamination. Methods: Several isolates from g…	Rejected	No drought stress
APX' + 'gene expression'+ 'abiotic stress' + ' plants'+ 'PGPR'	Google scholar	Bacillus amyloliquefaciens inoculation alters physiology of rice (Oryza sativa L. var. IR-36) through modulating carbohydrate metabolism to mitigate stress induced by nutrient starvation	Bisht et al., 2020	To avoid disproportionate usage of chemicals in agriculture, an alternative eco-friendly strategy is required to im- prove soil fertility, and enhance crop productivity. Therefore, the present study demonstrates the role of plant beneficial rhizobacteria viz., Paenibacillus lentimorbus B-30488 (B-30488), Bacillus amyloliquefaciens SN13 (SN13), and their consortium in rice (Oryza sativa L. var. IR…	Rejected	Proteomic study
APX' + 'gene expression'+ 'abiotic stress' + ' plants'+ 'PGPR'	Google scholar	Plant growth promoting rhizobacteria modulates the antioxidant defense and the expression of stress responsive genes providing Pb accumulation and tolerance of grass pea	Abdelkrim et al., 2022	To ensure the success of phytoremediation, it is important to consider the appropriate combination of plants and microorganisms. This study was conducted to get a better insight into the underlying molecular and biochemical mechanism of grass pea (Lathyrus sativus L.) induced by plant growth promoting rhizobacteria (PGPR), when exposed for 3, 6, 9 and 14 days to 1 mM Pb in a hydroponic system. Th…	Rejected	Preprints
APX' + 'gene expression'+ 'abiotic stress' + ' plants'+ 'PGPR'	Google scholar	Chitosan Modified Biochar Increases Soybean (Glycine max L.) Resistance to Salt-Stress by Augmenting Root Morphology, Antioxidant Defense Mechanisms and the Expression of Stress-Responsive Genes	Mehmood et al., 2020	Salinity constitutes a negative abiotic factor that reduces soybean plant growth, production, and quality. The adsorption of Na+ by chitosan-modified biochar (CMB) has a significant effect on salinity but the application of CMB is limited in soybean. In the current study, CMB was used for characterization of physiological, biochemical, and molecular responses of soybean under salt stress. Compari…	Rejected	No PGPR
APX' + 'gene expression'+ 'abiotic stress' + ' plants'+ 'PGPR'	Google scholar	Understanding the molecular mechanisms for the enhanced phytoremediation of heavy metals through plant growth promoting rhizobacteria: A review	Manoj et al., 2020	Rapid industrialization, modern agricultural practices and other anthropogenic activities add a significant quantity of toxic heavy metals into the environment, which induces severe toxic effects on all form of living organisms, alter the soil properties and its biological activity. Remediation of heavy metal contaminated sites has become an urgent necessity. Among the existing strategies, phytor…	Rejected	review
APX' + 'gene expression'+ 'abiotic stress' + ' plants'+ 'PGPR'	Google scholar	Differential Physio-Biochemical and Metabolic Responses of Peanut (Arachis hypogaea L.) under Multiple Abiotic Stress Conditions	Patel et al., 2021	The frequency and severity of extreme climatic conditions such as drought, salinity, cold, and heat are increasing due to climate change. Moreover, in the field, plants are affected by multiple abiotic stresses simultaneously or sequentially. Thus, it is imperative to compare the effects of stress combinations on crop plants relative to individual stresses. This study investigated the differentia…	Rejected	No PGPR
APX' + 'gene expression'+ 'abiotic stress' + ' plants'+ 'PGPR'	Google scholar	Reactive Oxygen Species, Antioxidant Responses and Implications from a Microbial Modulation Perspective	Zandi et al., 2022	Environmental conditions are subject to unprecedented changes due to recent progressive anthropogenic activities on our planet. Plants, as the frontline of food security, are susceptible to these changes, resulting in the generation of unavoidable byproducts of metabolism (ROS), which eventually affect their productivity. The response of plants to these unfavorable conditions is highly intricate …	Rejected	Review
APX' + 'gene expression'+ 'abiotic stress' + ' plants'+ 'PGPR'	Google scholar	Exogenous application of salicylic acid for regulation of sunflower growth under abiotic stress: a systematic review	Damalas et al., 2022	In the current review, peer-reviewed publications from the Web of Science and SCOPUS databases concerning the impact of exogenous application of salicylic acid (SA) on sunflower growth in stressful environments were analyzed. Nine studies reported that SA application improved sunflower growth under salinity stress by enhancing K+ uptake and depressing Na+ and Cl− in the plant, increasing the acti…	Rejected	Review
APX' + 'gene expression'+ 'abiotic stress' + ' plants'+ 'PGPR'	Google scholar	Paenibacillus yonginensis DCY84T induces changes in Arabidopsis thaliana gene expression against aluminum, drought, and salt stress	Sukweenadhi et al., 2015	Current agricultural production methods, for example the improper use of chemical fertilizers and pesti- cides, create many health and environmental problems. Use of plant growth-promoting bacteria (PGPB) for agricultural benefits is increasing worldwide and also appears to be a trend for the future. There is possibility to develop microbial inoculants for use in agricultural biotechnology, based…	Rejected	No APX
APX' + 'gene expression'+ 'abiotic stress' + ' plants'+ 'PGPR'	Google scholar	Overexpression of differentially expressed AhCytb6 gene during plant‐microbe interaction improves tolerance to N2 deficit and salt stress in transgenic tobacco	Alexander et al., 2021	Stenotrophomonas maltophilia has plant growth‐promoting potential, and interaction with Arachis hypogaea changes host‐plant physiology, biochemistry, and metabolomics, which provides tolerance under the N2 starvation conditions. About 226 suppression subtractive hybridization clones were obtained from plant‐microbe interaction, of which, about 62% of gene sequences were uncharacterized, whereas 2…	Rejected	No APX
APX' + 'gene expression'+ 'abiotic stress' + ' plants'+ 'PGPR'	Google scholar	Co‐inoculation Effects of Rhizobium sullae and Pseudomonas sp. on Growth, Antioxidant Status, and Expression Pattern of Genes Associated with Heavy Metal Tolerance and Accumulation of Cadmium in Sulla coronaria	Chiboub et al., 2020	Recently, phytoremediation assisted by soil bacteria has emerged as a potential tool to clean up the metal-contaminated/ polluted environment. Three plant-growth-promoting bacteria (PGPBs): Rhizobium sullae, Pseudomonas fluorescens, and Pseudomonas sp. were found to tolerate cadmium (Cd) stress. Sulla coronaria inoculated with these PGPBs, and grown under different Cd concentrations (0, 100, and …	Rejected	Proteomic study
APX' + 'gene expression'+ 'abiotic stress' + ' plants'+ 'PGPR'	Google scholar	Potential of plant growth-promoting rhizobacteria-plant interactions in mitigating salt stress for sustainable agriculture: A review	KUMAWAT et al., 2022	Soil salinization affecting different crops is one of the serious threats to global food security. Soil salinity affects 20% and 33% of the total cultivated and irrigated agricultural lands, respectively, and has been reported to caused a global crop production loss of 27.3 billion USD. The conventional approaches, such as using salt-tolerant varieties, saline soil scrapping, flushing, leaching, …	Rejected	Review
APX' + 'gene expression'+ 'abiotic stress' + ' plants'+ 'PGPR'	Google scholar	Abiotic Stress and Reactive Oxygen Species: Generation, Signaling, and Defense Mechanisms	Sachdev et al., 2021	Climate change is an invisible, silent killer with calamitous effects on living organisms. As the sessile organism, plants experience a diverse array of abiotic stresses during ontogenesis. The relentless climatic changes amplify the intensity and duration of stresses, making plants dwindle to survive. Plants convert 1–2% of consumed oxygen into reactive oxygen species (ROS), in particular, singl…	Rejected	review
APX' + 'gene expression'+ 'abiotic stress' + ' plants'+ 'PGPR'	Google scholar	The cytokinin-producing plant beneficial bacterium Pseudomonas fluorescens G20-18 primes tomato (Solanum lycopersicum) for enhanced drought stress responses	Mekureyaw et al., 2022	Plant growth-promoting rhizobacteria (PGPR) are known for exerting beneficial effects on plant growth and tolerance to plant pathogens. However, their specific role in mediating protection against abiotic stress remains underexplored. The aim of this study was to characterise the ability of the cytokinin-producing beneficial bac- terium Pseudomonas fluorescens G20-18 to enhance tomato growth and …	Rejected	Proteomic study
APX' + 'gene expression'+ 'abiotic stress' + ' plants'+ 'PGPR'	Google scholar	Halotolerant microbes and their applications in sustainable agriculture	Kulkarni et al., 2020		Rejected	Chapter book
APX' + 'gene expression'+ 'abiotic stress' + ' plants'+ 'PGPR'	Google scholar	Plant-growth-promoting rhizobacteria: drought stress alleviators to ameliorate crop production in drylands	Kaushal et al., 2016	Drylands are known for being a drought stressed environment, which is an alarming constraint to crop produc- tivity. To rescue plant growth in such stressful conditions, plant-growth-promoting rhizobacteria (PGPR) are a bulwark against drought stress and imperilled sustainability of agricul- ture in drylands. PGPR mitigates the impact of drought stress on plants through a process called rhizobact…	Rejected	Review
APX' + 'gene expression'+ 'abiotic stress' + ' plants'+ 'PGPR'	Google scholar	Bacillus licheniformis SA03 Confers Increased Saline–Alkaline Tolerance in Chrysanthemum Plants by Induction of Abscisic Acid Accumulation	Zhou et al., 2017	Soil saline-alkalization is a major abiotic stress that leads to low iron (Fe) availability and high toxicity of sodium ions (Na+) for plants. It has recently been shown that plant growth promoting rhizobacteria (PGPR) can enhance the ability of plants to tolerate multiple abiotic stresses such as drought, salinity, and nutrient deficiency. However, the possible involvement of PGPR in improving s…	Rejected	Proteomic study
APX' + 'gene expression'+ 'abiotic stress' + ' plants'+ 'PGPR'	Google scholar	Does plant—Microbe interaction confer stress tolerance in plants: A review?	Kumar et al., 2018	The biotic and abiotic stresses are major constraints for crop yield, food quality and global food security. A number of parameters such as physiological, biochemical, molecular of plants are affected under stress condi- tion. Since the use of inorganic fertilizers and pesticides in agriculture practices cause degradation of soil fertility and environmental pollutions. Hence it is necessary to de…	Rejected	Review
APX' + 'gene expression'+ 'abiotic stress' + ' plants'+ 'PGPR'	Google scholar	Insights into the Bacterial and Nitric Oxide-Induced Salt Tolerance in Sugarcane and Their Growth-Promoting Abilities	Sharma et al., 2021	Soil salinity causes severe environmental stress that affects agriculture production and food security throughout the world. Salt-tolerant plant-growth-promoting rhizobacteria (PGPR) and nitric oxide (NO), a distinctive signaling molecule, can synergistically assist in the alleviation of abiotic stresses and plant growth promotion, but the mechanism by which this happens is still not well known. …	Rejected	Proteomic study
APX' + 'gene expression'+ 'abiotic stress' + ' plants'+ 'PGPR'	Google scholar	Interaction of plant growth promoting bacteria with tomato under abiotic stress: A review	Singh et al., 2018	Tomato is one of the most demanding/utilizable vegetable crops worldwide after potato. It is extensively cul- tivated throughout the tropics and sub-tropics around the world. However, certain climate change consequences like salinity, drought, and environmental pollutants particularly heavy metals etc., lead to low soil productivity. In fact, problem of salinity, drought and soil contamination ar…	Rejected	Review
APX' + 'gene expression'+ 'abiotic stress' + ' plants'+ 'PGPR'	Google scholar	Overexpression of the tyrosine decarboxylase gene MdTyDC in apple enhances long-term moderate drought tolerance and WUE	Wang et al., 2021	Drought stress affects the apple yield and quality. Tyrosine decarboxylase (TyDC) plays a fundamental role in many secondary metabolite reactions in higher plants (including those involving dopamine). Our aims of this study are: 1) to identify the role of TyDC in dopamine derivative biosynthesis and its function in long-term moderate drought conditions; and 2) to explore the role of MdTyDC in pla…	Rejected	No PGPR
APX' + 'gene expression'+ 'abiotic stress' + ' plants'+ 'PGPR'	Google scholar	Safe Cultivation of Medicago sativa in Metal-Polluted Soils from Semi-Arid Regions Assisted by Heat- and Metallo-Resistant PGPR	Raklami et al., 2019	Soil contamination with heavy metals is a constraint for plant establishment and development for which phytoremediation may be a solution, since rhizobacteria may alleviate plant stress under these conditions. A greenhouse experiment was conducted to elucidate the effect of toxic metals on growth, the activities of ROS (reactive oxygen species)-scavenging enzymes, and gene expression of Medicago …	Rejected	Proteomic study
APX' + 'gene expression'+ 'abiotic stress' + ' plants'+ 'PGPR'	Google scholar	Microbial amelioration of salinity stress in endangered accessions of Iranian licorice (Glycyrrhiza glabra L.)	Mousavi et al., 2022	Glycyrrhiza glabra L. is a medicinal and industrial plant that has gone extinct due to different abiotic stress caused by climate change. To understand how the plant-associated microorganism can support this plant under salinity, we collected sixteen Iranian accessions of G. glabra L., inoculated their rhizomes with Azotobacter sp. (two levels, bacterial treatments, and no-bacterial treatments, a…	Rejected	Proteomic study
APX' + 'gene expression'+ 'abiotic stress' + ' plants'+ 'PGPR'	Google scholar	Plant Growth Promotion and Amelioration of Salinity Stress in Crop Plants by a Salt-Tolerant Bacterium	Chakraborty et al., 2011	Out of a large number of bacteria isolated from the rhizosphere of Cynodon dactylon, a facultative halophyte, nine were found to be highly salt-tolerant, growing in nutrient agar medium supplemented with 10% NaCl. Morphological, biochemical, and molecular characterization of all the isolates was done. RAPD analysis to determine relatedness among the nine bacteria were carried out, which revealed …	Rejected	No APX
APX' + 'gene expression'+ 'abiotic stress' + ' plants'+ 'PGPR'	Google scholar	Molecular and physiological analysis of drought stress responses in Zea mays treated with plant growth promoting rhizobacteria	AHMAD et al., 2019	Our research intended to appraise the performance of two different Pseudomonas strains on Zea mays L. (cv. B73) under drought stress and non-stress conditions. Plants were inoculated with P. putida KT2440 (Pp) and P. fluorescens (Pf1) followed by sampling at 0, 3rd, and 6th day after imposition of drought stress (DAS). Both strains demonstrated significant improvement in root length, protein cont…	Rejected	No APX
APX' + 'gene expression'+ 'abiotic stress' + ' plants'+ 'PGPR'	Google scholar	Evaluation of abiotic stress tolerance in transgenic potato plants with reduced expression of PSII manganese stabilizing protein	Gururani et al., 2013	Manganese stabilizing protein (MSP) is an important component of the Photosystem II (PSII) oxygen evolving complex. In our previous work, transgenic potato plants with reduced expression of MSP (MSP- As) were developed and their physiological and biochemical responses were studied. In this report, we address the response of MSP-As plants toward salinity, heavy metal and osmotic stresses. MSP-As p…	Rejected	No PGPR
APX' + 'gene expression'+ 'abiotic stress' + ' plants'+ 'PGPR'	Google scholar	Plant Growth Promoting Rhizobacteria, Arbuscular Mycorrhizal Fungi and Their Synergistic Interactions to Counteract the Negative Effects of Saline Soil on Agriculture: Key Macromolecules and Mechanisms	Sagar et al., 2021	Soil saltiness is a noteworthy issue as it results in loss of profitability and development of agrarian harvests and decline in soil health. Microorganisms associated with plants contribute to their growth promotion and salinity tolerance by employing a multitude of macromolecules and pathways. Plant growth promoting rhizobacteria (PGPR) have an immediate impact on improving profitability based o…	Rejected	review
APX' + 'gene expression'+ 'abiotic stress' + ' plants'+ 'PGPR'	Google scholar	Differential Activity of Autochthonous Bacteria in Controlling Drought Stress in Native Lavandula and Salvia Plants Species Under Drought Conditions in Natural Arid Soil	Armada et al., 2014	The effectiveness of autochthonous plant growth- promoting rhizobacteria was studied in Lavandula dentata and Salvia officinalis growing in a natural arid Mediterranean soil under drought conditions. These bacteria identified as Bacillus megaterium (Bm), Enterobacter sp. (E), Bacillus thuringiensis (Bt), and Bacillus sp. (Bsp). Each bacteria has different potential to meliorate water limitation a…	Rejected	Proteomic study
APX' + 'gene expression'+ 'abiotic stress' + ' plants'+ 'PGPR'	Google scholar	Regulation of drought stress in plants	Farooqi et al., 2020		Rejected	Chapter book
APX' + 'gene expression'+ 'abiotic stress' + ' plants'+ 'PGPR'	Google scholar	Jasmonic acid: a key frontier in conferring abiotic stress tolerance in plants	Raza et al., 2021	Abiotic stresses are the primary sources of crop losses globally. The identification of key mechanisms deployed and estab- lished by plants in response to abiotic stresses is necessary for the maintenance of their growth and persistence. Recent discoveries have revealed that phytohormones or plant growth regulators (PGRs), mainly jasmonic acid (JA), have increased our knowledge of hormonal signal…	Rejected	Review
APX' + 'gene expression'+ 'abiotic stress' + ' plants'+ 'PGPR'	Google scholar	Synergistic effect of Pseudomonas putida and Bacillus amyloliquefaciens ameliorates drought stress in chickpea (Cicer arietinum L.)	Kumar, et al., 2016	Two plant growth promoting rhizobacteria (PGPR) Pseudomonas putida NBRIRA and Bacillus amyloliquefaciens NBRISN13 with ability to tolerate abiotic stress along with multiple PGP traits like ACC deaminase activity, minerals solubilisation, hormones production, biofilm formation, siderophore activity were evaluated for their synergistic effect to ameliorate drought stress in chickpea. Earlier we ha…	Rejected	Proteomic study
APX' + 'gene expression'+ 'abiotic stress' + ' plants'+ 'PGPR'	Google scholar	Bacillus amyloliquefaciens alters the diversity of volatile and non-volatile metabolites and induces the expression of defence genes for the management of Botrytis leaf blight of Lilium under protected conditions	Nakkeeran et al., 2020	Lilium leaf blight induced by Botrytis cinerea is a major threat in the cultivation of Lilium in the Nilgiris province of Tamil Nadu, India under protected conditions. The present study aims to understand bipartite and tripartite interactions between B. cinerea, Lilium and B. amyloliquefaciens to develop a cost-effective antagonist to manage Botrytis leaf blight. The in vitro antagonism by B. amy…	Rejected	Biotic stress
APX' + 'gene expression'+ 'abiotic stress' + ' plants'+ 'PGPR'	Google scholar	Inoculation with Azospirillum lipoferum or Azotobacter chroococcum Reinforces Maize Growth by Improving Physiological Activities Under Saline Conditions	Latef et al., 2020	A pot study was performed to examine the effect of plant growth-promoting rhizobacteria (PGPR) including Azospirillum lipoferum or Azotobacter chroococcum on growth criteria (leaf area and seedlings fresh and dry weight), pigments [chloro- phylls (Chl a and b) and carotenoids], osmolytes (soluble sugars, soluble proteins and proline), nutrient uptake, antioxidant enzyme activities, and oxidative …	Rejected	Proteomic study
APX' + 'gene expression'+ 'abiotic stress' + ' plants'+ 'PGPR'	Google scholar	Paenibacillus lentimorbus Inoculation Enhances Tobacco Growth and Extenuates the Virulence of Cucumber mosaic virus	Kumar et al., 2016	Previous studies with Paenibacillus lentimorbus B-30488” (hereafter referred as B-30488), a plant growth promoting rhizobacteria (PGPR) isolated from cow’s milk, revealed its capabili- ties to improve plant quality under normal and stress conditions. Present study investigates its potential as a biocontrol agent against an economically important virus, Cucumber mosaic virus (CMV), in Nicotiana ta…	rejected	biotic stress
APX' + 'gene expression'+ 'abiotic stress' + ' plants'+ 'PGPR'	Google scholar	Delineation of mechanistic approaches of rhizosphere microorganisms facilitated plant health and resilience under challenging conditions	Dukare et al., 2022	Sustainable agriculture demands the balanced use of inorganic, organic, and microbial biofertilizers for enhanced plant productivity and soil fertility. Plant growth-enhancing rhizospheric bacteria can be an excellent biotechnological tool to augment plant productivity in different agricultural setups. We present an overview of microbial mechanisms which directly or indirectly contribute to plant…	Rejected	Review
APX' + 'gene expression'+ 'abiotic stress' + ' plants'+ 'PGPR'	Google scholar	Effects of water stress and inoculation with plant growth promoting rhizobacteria (PGPR) on antioxidant status and photosynthetic pigments in basil (Ocimum basilicum L.)	Heidari et al., 2012	Effects of water stress and inoculation with plant growth promoting rhizobacteria (PGPR) on antioxidant activity and photosynthetic pigments were studied in basil plants. A field experiment was conducted at the University of Zabol in Iran during 2010 growing season. The experiment laid out as split plot based on randomized complete block design with three replica- tions. Three levels of water str…	Rejected	Proteomic study
APX' + 'gene expression'+ 'abiotic stress' + ' plants'+ 'PGPR'	Google scholar	A review on drought stress in plants: Implications, mitigation and the role of plant growth promoting rhizobacteria	Ahluwalia et al., 2021	Increasing population and subsequent food requirement puts a lot of onus on agriculture worldwide. However, agricultural output is constantly influenced by several factors such as small land holdings, lack of proper mechanization, and occurrence of several abiotic and biotic stresses. Drought stress is one such abiotic stress which causes major setbacks to agricultural productivity every year. Wa…	Rejected	Review
APX' + 'gene express'+ 'abiotic stress' + ' plants'+ 'PGPR'	Google scholar	Response of Phenylpropanoid Pathway and the Role of Polyphenols in Plants under Abiotic Stress	Sharma et al., 2019	Phenolic compounds are an important class of plant secondary metabolites which play crucial physiological roles throughout the plant life cycle. Phenolics are produced under optimal and suboptimal conditions in plants and play key roles in developmental processes like cell division, hormonal regulation, photosynthetic activity, nutrient mineralization, and reproduction. Plants exhibit increased s…	Rejected	Review
APX' + 'gene express'+ 'abiotic stress' + ' plants'+ 'PGPR'	Google scholar	Plant Microbe Symbiosis	Varma et al., 2020		Rejected	Book
APX' + 'gene express'+ 'abiotic stress' + ' plants'+ 'PGPR'	Google scholar	Abiotic Stress Responses and Microbe-Mediated Mitigation in Plants: The Omics Strategies	Meena et al., 2017	Abiotic stresses are the foremost limiting factors for agricultural productivity. Crop plants need to cope up adverse external pressure created by environmental and edaphic conditions with their intrinsic biological mechanisms, failing which their growth, development, and productivity suffer. Microorganisms, the most natural inhabitants of diverse environments exhibit enormous metabolic capabilit…	Rejected	Review
APX' + 'gene express'+ 'abiotic stress' + ' plants'+ 'PGPR'	Google scholar	Plants Saline Environment in Perception with Rhizosphere Bacteria Containing 1-Aminocyclopropane-1-Carboxylate Deaminase	Bomle et al., 2021	Soil salinity stress has become a serious roadblock for food production worldwide since it is one of the key factors affecting agricultural productivity. Salinity and drought are predicted to cause considerable loss of crops. To deal with this difficult situation, a variety of strategies have been developed, including plant breeding, plant genetic engineering, and a wide range of agricultural pra…	Rejected	Review
APX' + 'gene express'+ 'abiotic stress' + ' plants'+ 'PGPR'	Google scholar	Seed priming for abiotic stress tolerance: an overview	Jisha et al., 2013	Plants are exposed to any number of potentially adverse environmental conditions such as water deficit, high salinity, extreme temperature, submergence, etc. These abiotic stresses adversely affect the plant growth and pro- ductivity. Nowadays various strategies are employed to generate plants that can withstand these stresses. In recent years, seed priming has been developed as an indispensable …	Rejected	Review
APX' + 'gene express'+ 'abiotic stress' + ' plants'+ 'PGPR'	Google scholar	Unraveling the role of plant growth-promoting rhizobacteria in the alleviation of arsenic phytotoxicity: A review	Mondal et al., 2021	The toxic metalloid arsenic (As), is a major pollutant of soil and water, imposing severe health concerns on human lives. It enters the food chain mainly through As-contaminated crops. The uptake, translocation and accumulation of As in plant tissue are often controlled by certain soil-inhabiting microbial communities. Among them, indigenous, free-living As-resistant plant growth-promoting rhizob…	Rejected	Review
APX' + 'gene express'+ 'abiotic stress' + ' plants'+ 'PGPR'	Google scholar	Genetic, Epigenetic, Genomic and Microbial Approaches to Enhance Salt Tolerance of Plants: A Comprehensive Review	Saradadevi et al., 2021	Globally, soil salinity, which refers to salt-affected soils, is increasing due to various environmental factors and human activities. Soil salinity poses one of the most serious challenges in the field of agriculture as it significantly reduces the growth and yield of crop plants, both quantitatively and qualitatively. Over the last few decades, several studies have been carried out to understan…	Rejected	Review
APX' + 'gene express'+ 'abiotic stress' + ' plants'+ 'PGPR'	Google scholar	Physiological and biochemical traits in coriander affected by plant growth-promoting rhizobacteria under salt stress	Rabiei et al., 2020	Salinity is a major environmental stress that limits crop production worldwide. It is well-understood that envi- ronmental adaptations, physiological and biochemical traits adjust salinity tolerance in plants, but imparting the knowledge gained towards crop improvement remain arduous. Utilizing the potentially of beneficial microor- ganisms present in the rhizosphere is an alternative strategy to…	Rejected	Proteomic study
APX' + 'gene express'+ 'abiotic stress' + ' plants'+ 'PGPR'	Google scholar	Global Gene Expression Analysis Reveals Crosstalk between Response Mechanisms to Cold and Drought Stresses in Cassava Seedlings	Li et al., 2017	Abiotic stress negatively impacts cassava (Manihot esculenta) growth and yield. Several molecular mechanisms of plant response to cold and drought have been identified and described in the literature, however, little is known about the crosstalk of the responses of cassava to these two stresses. To elucidate this question, transcriptome analysis of cassava seedlings under cold or PEG-simulated dr…	Rejected	No PGPR
APX' + 'gene express'+ 'abiotic stress' + ' plants'+ 'PGPR'	Google scholar	Biostimulants in Viticulture: A Sustainable Approach against Biotic and Abiotic Stresses	Cataldo et al., 2021	Climate change and disproportionate anthropogenic interventions, such as the excess of phytopharmaceutical products and continuous soil tillage, are jeopardizing viticulture by subjecting plants to continuous abiotic stress. One of the main physiological repercussions of abiotic stress is represented by the unbalanced redox homeostasis due to the overproduction of reactive oxygen species (ROS), u…	Rejected	Review
APX' + 'gene express'+ 'abiotic stress' + ' plants'+ 'PGPR'	Google scholar	microRNA 166: an evolutionarily conserved stress biomarker in land plants targeting HD-ZIP family	Yadav et al., 2021	MicroRNAs (miRNAs) are significant class of noncoding RNAs having analytical investigating and modulatory roles in various signaling mechanisms in plants related to growth, development and environmental stress. Conserved miRNAs are an affirmation of land plants evolution and adaptation. They are a proof of indispensable roles of endogenous gene modulators that mediate plant survival on land. Out …	Rejected	Review
APX' + 'gene express'+ 'abiotic stress' + ' plants'+ 'PGPR'	Google scholar	Rhizobacterial Strain Bacillus megaterium BOFC15 Induces Cellular Polyamine Changes that Improve Plant Growth and Drought Resistance	Zhou et al., 2016	Plant-growth-promoting rhizobacteria can improve plant growth, development, and stress adaptation. However, the underlying mechanisms are still largely unclear. We investigated the effects of Bacillus megaterium BOFC15 on Arabidopsis plants. BOFC15 produced and secreted spermidine (Spd), a type of polyamine (PA) that plays an important role in plant growth. Moreover, BOFC15 induced changes in the…	Rejected	Proteomic study
APX' + 'gene express'+ 'abiotic stress' + ' plants'+ 'PGPR'	Google scholar	Melatonin-Producing Endophytic Bacteria from Grapevine Roots Promote the Abiotic Stress-Induced Production of Endogenous Melatonin in Their Hosts	Jiao et al., 2016	Endophytes form symbiotic relationships with plants and constitute an important source of phytohormones and bioactive secondary metabolites for their hosts. To date, most studies of endophytes have focused on the influence of these microorganisms on plant growth and physiology and their role in plant defenses against biotic and abiotic stressors; however, to the best of our knowledge, the ability…	Rejected	Proteomic study
APX' + 'gene express'+ 'abiotic stress' + ' plants'+ 'PGPR'	Google scholar	Supplementation with plant growth promoting rhizobacteria (PGPR) alleviates cadmium toxicity in Solanum lycopersicum by modulating the expression of secondary metabolites	Khanna et al., 2019	The current study evaluated the synergistic role of Plant growth promoting rhizobacteria (PGPR), Pseudomonas aeruginosa and Burkholderia gladioli on different physiological, biochemical and molecular activities of 10-days old Solanum lycopersicum seedlings under Cd stress. Cd toxicity altered the levels of phenolic compounds (total phenols (30.2%), flavonoids (92.7%), anthocyanin (59.5%), polyphe…	Rejected	No APX
APX' + 'gene express'+ 'abiotic stress' + ' plants'+ 'PGPR'	Google scholar	Microbiome engineering and plant biostimulants for sustainable crop improvement and mitigation of biotic and abiotic stresses	Lau et al., 2021	Globally, despite the intense agricultural production, the output is expected to be limited by emerging infectious plant diseases and adverse impacts of climate change. The annual increase in agricultural output to sustain the human popu- lation at the expense of the environment has exacerbated the current climate conditions and threatened food security. The demand for sustainable agricultural pr…	Rejected	Review
APX' + 'gene express'+ 'abiotic stress' + ' plants'+ 'PGPR'	Google scholar	Extending thermotolerance to tomato seedlings by inoculation with SA1 isolate of Bacillus cereus and comparison with exogenous humic acid application	Khan et al., 2020	Heat stress is one of the major abiotic stresses that impair plant growth and crop productivity. Plant growth-promoting endophytic bacteria (PGPEB) and humic acid (HA) are used as bio- stimulants and ecofriendly approaches to improve agriculture crop production and counteract the negative effects of heat stress. Current study aimed to analyze the effect of thermotolerant SA1 an isolate of Bacillu…	Rejected	Proteomic study
APX' + 'gene express'+ 'abiotic stress' + ' plants'+ 'PGPR'	Google scholar	Molecular mechanisms associated with microbial biostimulant‐mediated growth enhancement, priming and drought stress tolerance in maize plants	Lephatsi et al., 2022	Microbial‐based biostimulants are emerging as effective strategies to improve agricultural productivity; however, the modes of action of such formulations are still largely unknown. Thus, herein we report elucidated metabolic reconfigurations in maize (Zea mays) leaves associated with growth promotion and drought stress tolerance induced by a microbial‐based biostimulant, a Bacillus consortium. M…	Rejected	Proteomic study
APX' + 'gene express'+ 'abiotic stress' + ' plants'+ 'PGPR'	Google scholar	SALT TOLERANT BACTERIA FOR CROP IMPROVEMENT IN SALINE AGRICULTURE FIELDS: DEVELOPMENT, CHALLENGES AND OPPORTUNITIES	Arti et al., 2020	Saline stress has been the one of the biggest hurdles in achieving the demand and supply ratio of global population. To combat the growing problem of soil salinity, advanced soil management and irrigation technology are used. However, they are cost and energy intensive. Plant growth promoting rhizobacteria (PGPR) attained from saline soils can overcome the detrimental effects of salt stress on pl…	Rejected	Review
APX' + 'gene express'+ 'abiotic stress' + ' plants'+ 'PGPR'	Google scholar	Antioxidant, physiological and biochemical responses of drought susceptible and drought tolerant mustard (Brassica juncea L) genotypes to rhizobacterial inoculation under water deficit stress	Bandeppa et al., 2019	Response of drought susceptible (DS) genotype Pusa Karishma LES-39 and drought tolerant (DT) mustard genotype NPJ-124, to rhizobacterial inoculation under water deficit stress, was compared in the present study to determine the influence of inoculants on biochemical and physiological attributes of these two different geno- types. Inoculation was observed to improve root and shoot dry weight in bo…	Rejected	Proteomic study
APX' + 'gene express'+ 'abiotic stress' + ' plants'+ 'PGPR'	Google scholar	Biochemical basis of improvement of defense in tomato plant against Fusarium wilt by CaCl2	Chakraborty et al., 2017	The objective of this study was to investigate the effectiveness of calcium chloride (CaCl2), as potential elicitor, on tomato plants against Fusarium oxysporum f. sp. lycopersici. Foliar application of CaCl2 showed sig- nificant reduction of wilt incidence after challenge inocu- lation. Increased production of defense and antioxidant enzymes was observed in elicitor treated sets over control. Si…	Rejected	Biotic stress
APX' + 'gene express'+ 'abiotic stress' + ' plants'+ 'PGPR'	Google scholar	Arbuscular mycorrhiza in combating abiotic stresses in vegetables: An eco-friendly approach	Malhi et al., 2021	Vegetable production is hampered by several abiotic stresses which are very common in this era of cli- mate change. There is a huge pressure on the plants to survive and yield better results even in the preva- lence of various environmental stresses such as cold stress, drought, heat stress, salinity etc. This necessitates the need of robust plant growth which is possible with mycorrhizal associa…	Rejected	Review
APX' + 'gene express'+ 'abiotic stress' + ' plants'+ 'PGPR'	Google scholar	ACC DEAMINASE PRODUCING PGPR INVOKE CHANGES IN ANTIOXIDANT SYSTEMS TO MINIMIZE THE ADVERSE EFFECTS OF SALT IN SUNFLOWER	Singh et al., 2019	In the present study, we demonstrated that the inoculation improved the growth of sunflower plants in upon salt stress with ACC deaminase producing plant growth promoting rhizobacteria (PGPR) isolates (Pseudomonas otitidis Rhizo SF 7 and Acinetobacter calcoaceticus Rhizo SF 9). Sunflower plants treated with both ACCd producing PGPR isolates exhibited significant improvement in plant height, shoot…	Rejected	Proteomic study
APX' + 'gene express'+ 'abiotic stress' + ' plants'+ 'PGPR'	Google scholar	Transcriptome analysis and differential gene expression profiling of two contrasting quinoa genotypes in response to salt stress	Shi et al., 2020	Background: Soil salinity is one of the major abiotic stress factors that affect crop growth and yield, which seriously restricts the sustainable development of agriculture. Quinoa is considered as one of the most promising crops in the future for its high nutrition value and strong adaptability to extreme weather and soil conditions. However, the molecular mechanisms underlying the adaptive resp…	Rejected	No PGPR
APX' + 'gene express'+ 'abiotic stress' + ' plants'+ 'PGPR'	Google scholar	Portraying mechanics of plant growth promoting rhizobacteria (PGPR): A review	Goswami et al., 2016	Population growth and increase in food requirement is the global problem. It is inevitable to introduce new practices that help to increase agricultural produc- tivity. Use of plant growth promoting rhizobacteria (PGPR) has shown potentials to be a promising technique in the practice of sustainable agriculture. A group of natural soil microbial flora acquire dwelling in the rhizosphere and on the…	Rejected	Review
APX' + 'gene express'+ 'abiotic stress' + ' plants'+ 'PGPR'	Google scholar	Microalgae (Chlorella vulgaris Beijerinck) alleviates drought stress of broccoli plants by improving nutrient uptake, secondary metabolites, and antioxidative defense system	Kusvuran et al., 2021	Microalgae, such as Chlorella vulgaris Beijerinck (green algae), are beneficial microscopic organisms that may help plants to improve nutrient uptake, growth, and abiotic tolerance to stressors. The current study was performed to investigate the effectiveness of algae (Chlorella vulgaris Beijerinck) foliar applications [1%, 3%, or 5% (v/v)] on mitigation of drought stress in broccoli plants subje…	Rejected	No PGPR
APX' + 'gene express'+ 'abiotic stress' + ' plants'+ 'PGPR'	Google scholar	TASOS1 AND TATM20 GENES EXPRESSION AND NUTRIENT UPTAKE IN WHEAT SEEDLINGS MAY BE ALTERED VIA EXCESS CADMIUM EXPOSURE AND INOCULATION WITH AZOSPIRILLUM BRASILENSE SP7 UNDER SALINE CONDITION	GHASSEMI et al., 2017	. Excess of salt and cadmium (Cd) damage the plant’s growth; however, Cd toxicity is more severe under saline condition. Triticum aestivum transmembrane 20 (TaTM20) and salt overly sensitive (SOS) respond to salinity. Moreover, wheat-Azospirillum association system leads to an increase in wheat tolerance to abiotic stresses. Less information exists related to the effect of salinity and Cd under w…	Rejected	Proteomic study
APX' + 'gene express'+ 'abiotic stress' + ' plants'+ 'PGPR'	Google scholar	Drought-mitigating Pseudomonas putida GAP-P45 modulates proline turnover and oxidative status in Arabidopsis thaliana under water stress	Ghosh et al., 2018	We had previously reported the impact of Pseudomonas putida GAP-P45 on the morpho-physiological parameters and expres- sion of proline metabolic genes in Arabidopsis thaliana as a response to water-deficit stress as reported by Ghosh et al. (Ann Microbiol 67:655–668, 2017). In this work, we analyzed the impact of P. putida GAP-P45 on proline metabolic enzyme activity, accumulation of reactive oxy…	Rejected	Proteomic study
APX' + 'gene express'+ 'abiotic stress' + ' plants'+ 'PGPR'	Google scholar	Gamma-aminobutyric acid (GABA) and acetylcholine (ACh) alleviate water deficit effects in soybean: From gene expression up to growth performance	Braga-Reis et al., 2021	Bioregulators act as priming agents under abiotic stress conditions. Bioregulators such as gamma-aminobutyric acid (GABA) and acetylcholine (ACh) affect the efficiency of the antioxidant system and the regulation of the stomatal aperture, respectively. The aim of this study was to verify a possible synergistic effect among these bioregulators as attenuators of the effects of water deficiency in G…	Rejected	No PGPR
APX' + 'gene express'+ 'abiotic stress' + ' plants'+ 'PGPR'	Google scholar	Beat the heat: plant- and microbe-mediated strategies for crop thermotolerance	Shekhawat et al., 2022	Heat stress (HS) affects plant growth and development, and reduces crop yield. To combat HS, plants have evolved several sophisticated strategies. The primary HS response in plants involves the activation of heat-shock transcription factors and heat-shock proteins (HSPs). Plants also deploy more advanced epigenetic mechanisms in response to recurring HS conditions. In addition, beneficial microbe…	Rejected	Review
APX' + 'gene express'+ 'abiotic stress' + ' plants'+ 'PGPR'	Google scholar	evaluation of plant growth promotion properties and induction of antioxidative defense mechanism by tea rhizobacteria of Darjeeling, india	Bhattacharyya et al., 2020	A total of 120 rhizobacteria were isolated from seven different tea estates of Darjeeling, West Bengal, india. Based on a functional screening of in vitro plant growth-promoting (pGp) activities, thirty potential rhizobacterial isolates were selected for in-planta evaluation of pGp activities in rice and maize crops. All the thirty rhizobacterial isolates were identified using partial 16S rRNA ge…	Rejected	Review
APX' + 'gene express'+ 'abiotic stress' + ' plants'+ 'PGPR'	Google scholar	Abiotic stress tolerance in agriculture	Singh et al., 2019	Plants being sessile, are seriously affected by plethora of factors among which abiotic stresses notably drought, salinity and extreme temperature conditions are major constraint worldwide, reducing more than 50% yield in major crops. Stress conditions reduce plant growth by affecting various physiological and biochemical processes such as photosynthesis, respiration, translocation, ion uptake, s…	Rejected	Review
APX' + 'gene express'+ 'abiotic stress' + ' plants'+ 'PGPR'	Google scholar	Role of DREB transcription factors in abiotic and biotic stress tolerance in plants	Agarwal et al., 2006	Abiotic and biotic stresses negatively influence survival, biomass production and crop yield. Being multi- genic as well as a quantitative trait, it is a challenge to understand the molecular basis of abiotic stress tolerance and to manipulate it as compared to biotic stresses. Lately, some transcription factor(s) that regulate the expression of several genes related to stress have been discovere…	Rejected	Review
APX' + 'gene express'+ 'abiotic stress' + ' plants'+ 'PGPR'	Google scholar	Evaluation of Trichoderma harzianum and Serratia proteamaculans effect on disease suppression, stimulation of ROS-scavenging enzymes and improving tomato growth infected by Rhizoctonia solani	Youssef et al., 2016	Rhizoctonia solani is one of the most devastating plant pathogen that affects major crops and causes con- siderable yield losses. The objectives of the present study were investigating the effect of the rhizobac- teria Serratia proteamaculans against R. solani comparing to Trichoderma harzianum and examining the ability of the two biocontrol agents to induce the plant defence system as a mechanis…	Rejected	Biotic stress
APX' + 'gene express'+ 'abiotic stress' + ' plants'+ 'PGPR'	Google scholar	Amelioration of Chlorpyrifos-Induced Toxicity in Brassica juncea L. by Combination of 24-Epibrassinolide and Plant-Growth-Promoting Rhizobacteria	Bakshi et al., 2021	Pervasive use of chlorpyrifos (CP), an organophosphorus pesticide, has been proven to be fatal for plant growth, especially at higher concentrations. CP poisoning leads to growth inhibition, chlorosis, browning of roots and lipid and protein degradation, along with membrane dysfunction and nuclear damage. Plants form a linking bridge between the underground and above-ground communities to escape …	Rejected	No PGPR
APX' + 'gene express'+ 'abiotic stress' + ' plants'+ 'PGPR'	Google scholar	Recent Advances in PGPR and Molecular Mechanisms Involved in Drought Stress Resistance	Sati et al., 2021	Increased severity of droughts, due to anthropogenic activities and global warming, has imposed a severe threat on agri- cultural productivity. This has escalated the need for environmentally sustainable solutions to secure global food security. In this context, the application of plant growth-promoting rhizobacteria (PGPR) can be beneficial. PGPR through various mechanisms viz. osmotic adjustmen…	Rejected	Review
APX' + 'gene express'+ 'abiotic stress' + ' plants'+ 'PGPR'	Google scholar	Coactive role of zinc oxide nanoparticles and plant growth promoting rhizobacteria for mitigation of synchronized effects of heat and drought stress in wheat plants	Azmat et al., 2022	This study intended to investigate the potential of the plant growth-promoting rhizobacteria (PGPR) and green synthesized zinc oxide nanoparticles (ZnO-NPs) (fruit extract of Papaya) against heat and drought stress in wheat. The characterization of green-synthesized ZnO-NPs was done through UV–vis spectrophotometry, Fourier-transform infrared spectrometry, X-ray diffraction and scanning electron …	Rejected	Proteomic study
APX' + 'gene express'+ 'abiotic stress' + ' plants'+ 'PGPR'	Google scholar	Role of plant-microbe interactions on abiotic stress tolerance in plants: A review	Rai et al., 2019	Plants are continuously exposed to a wide array of environmental stresses. Abiotic stress is one of the foremost limiting factors that are responsible for low agricultural productivity. The incidence of extreme events like prolonged drought, salinity, intense rain and flooding, heat wave and frost damage, metal toxicities in problematic soils are increasing day by day under the scenario of changi…	Rejected	Review
APX' + 'gene express'+ 'abiotic stress' + ' plants'+ 'PGPR'	Google scholar	Root exudates from citrus plants subjected to abiotic stress conditions have a positive effect on rhizobacteria	Vives-Peris et al., 2018	Plants are constantly releasing root exudates to the rhizosphere. These compounds are responsible for different (positive or negative) interactions with other organisms, including plants, fungi or bacteria. In this work, the effect of root exudates obtained from in vitro cultured citrus plants on two rhizobacteria (Pseudomonas putida KT2440 and Novosphingobium sp. HR1a) was evaluated. Root exudat…	Rejected	No PGPR
APX' + 'gene express'+ 'abiotic stress' + ' plants'+ 'PGPR'	Google scholar	Plant growth promoting rhizobacteria alleviate salinity induced negative effects on growth, oil content and physiological status in Mentha arvensis	Bharti et al., 2013	This study was aimed to investigate the effect of inoculation on three salt-tolerant, plant-growth-promot- ing rhizobacteria (PGPR) STR2 (Bacillus pumilus), STR8 (Halomonas desiderata) and STR36 (Exiguobacterium oxidotolerans), for their growth-promoting potential and efficacy in augmenting salt tolerance in Mentha arvensis, an essential oil-bearing crop and natural source of l-men- thol, under v…	Rejected	Proteomic study
APX' + 'gene express'+ 'abiotic stress' + ' plants'+ 'PGPR'	Google scholar	Trichoderma harzianum mitigates salt stress in cucumber via multiple responses	Zhang et al., 2019	Trichoderma harzianum T-soybean plays an important role in controlling soybean root rot disease. However, the mechanism by which it improves plant tolerance to salt stress is not clear. In this study, we investigated the possible mechanism of T-soybean in mitigating the damage caused by salt stress in Cucumis sativus L plants. Our results suggest that T-soybean improved salt tolerance of cucumber…	Rejected	Fungi
APX' + 'gene express'+ 'abiotic stress' + ' plants'+ 'PGPR'	Google scholar	Metal/Metalloid-Based Nanomaterials for Plant Abiotic Stress Tolerance: An Overview of the Mechanisms	Sarraf et al., 2021	In agriculture, abiotic stress is one of the critical issues impacting the crop productivity and yield. Such stress factors lead to the generation of reactive oxygen species, membrane damage, and other plant metabolic activities. To neutralize the harmful effects of abiotic stress, several strategies have been employed that include the utilization of nanomaterials. Nanomaterials are now gaining a…	Rejected	Review
APX' + 'gene express'+ 'abiotic stress' + ' plants'+ 'PGPR'	Google scholar	Amelioration of Chromium-Induced Oxidative Stress by Combined Treatment of Selected Plant-Growth-Promoting Rhizobacteria and Earthworms via Modulating the Expression of Genes Related to Reactive Oxygen Species Metabolism in Brassica juncea	Sharma et al., 2022	Chromium (Cr) toxicity leads to the enhanced production of reactive oxygen species (ROS), which are extremely toxic to the plant and must be minimized to protect the plant from oxidative stress. The potential of plant-growth-promoting rhizobacteria (PGPR) and earthworms in plant growth and development has been extensively studied. The present study was aimed at investigating the effect of two PGP…	Rejected	No drought stress
APX' + 'gene express'+ 'abiotic stress' + ' plants'+ 'PGPR'	Google scholar	Jasmonic Acid in Plant Abiotic Stress Tolerance and Interaction with Abscisic Acid	Kim et al., 2021	The phytohormone jasmonic acid (JA), a cyclopentane fatty acid, mediates plant responses to abiotic stresses. Abiotic stresses rapidly and dynamically affect JA metabolism and JA responses by upregulating the expression of genes involved in JA biosynthesis and signaling, indicating that JA has a crucial role in plant abiotic stress responses. The crucial role of JA has been demonstrated in many p…	Rejected	Review
APX' + 'gene express'+ 'abiotic stress' + ' plants'+ 'PGPR'	Google scholar	Induced resistance to control postharvest decay of fruit and vegetables	Romanazzi et al., 2016	More than one third of harvested fruit and vegetables are lost and do not reach the customers mainly due to postharvest decay. During the last decade, several postharvest fungicides have been excluded from the market, or their allowed residues have been significantly decreased. Therefore, there is growing interest in eco-friendly and safe alternatives to synthetic fungicides. Induced resistance h…	Rejected	Review
APX' + 'gene express'+ 'abiotic stress' + ' plants'+ 'PGPR'	Google scholar	Alteration in expression level of some growth and stress-related genes after rhizobacteria inoculation to alleviate drought tolerance in sensitive rice genotype	Omar et al., 2021	Background: Drought stress is one of the major abiotic stresses that adversely affect rice production. Four rice geno‐ types, Giza177, IR64 (as sensitive genotypes) and Vandana, Orabi3 (as tolerant genotypes) were used to screen and characterize the soil microbes associated with each genotype under drought stress. Results: The soil microbes associated with the tolerant genotypes showed high droug…	Rejected	Proteomic study
APX' + 'gene express'+ 'abiotic stress' + ' plants'+ 'PGPR'	Google scholar	Proteome analysis of Arabidopsis seedlings exposed to bacterial volatiles	Kwon et al., 2010	Plant root-associated bacteria (rhizobacteria) elicit plant basal immunity referred to as induced systemic resistance (ISR) against multiple pathogens. Among multi- bacterial determinants involving such ISR, the induction of ISR and promotion of growth by bacterial volatile compounds was previously reported. To exploit global de novo expression of plant proteins by bacterial volatiles, proteomic …	Rejected	No abiotic stress
APX' + 'gene express'+ 'abiotic stress' + ' plants'+ 'PGPR'	Google scholar	Field performance of bacterial inoculants to alleviate water stress effects in wheat (Triticum aestivum L.)	Chandra et al., 2019	Aims Plant growth promoting bacteria (PGPB) contain- ing 1-aminocyclopropane-1-carboxylate (ACC) deami- nase can play an important role in abiotic stress toler- ance in plants, particularly drought. The objective of this study was to evaluate bacterial strains Variovorax paradoxus RAA3, Pseudomonas palleroniana DPB16, Pseudomonas sp. UW4 for their ability to alleviate drought stress in wheat in f…	Rejected	Proteomic study
APX' + 'gene express'+ 'abiotic stress' + ' plants'+ 'PGPR'	Google scholar	Role of nanoparticles in crop improvement and abiotic stress management	Singh et al., 2021	Nanoparticles (NPs) possess specific physical and chemical features and they are capable enough to cross cellular barriers and show their effect on living organisms. Their capability to cross cellular barriers have been noticed for their application not only in medicine, electronics, chemical and physical sciences, but also in agriculture. In agriculture, nanotechnology can help to improve the gr…	Rejected	No PGPR
APX' + 'gene express'+ 'abiotic stress' + ' plants'+ 'PGPR'	Google scholar	Mitigation of drought stress in wheat crop by drought tolerant endophytic bacterial isolates	Meenakshi et al., 2019	Bacteria with potential to alleviate abiotic stresses in combination with plant growth promotion are extremely useful in sus- tainable agriculture. The present study involves the isolation and evaluation of 14 bacterial isolates obtained from four upland rice roots in varying concentrations of PEG-6000. Three potential isolates MKA2, MKA3 and MKA4 were selected for further experiments. A pot expe…	Rejected	Proteomic study
APX' + 'gene express'+ 'abiotic stress' + ' plants'+ 'PGPR'	Google scholar	An overview on improvement of crop productivity in saline soils by halotolerant and halophilic PGPRs	Saghafi et al., 2019	Salinity of water and soil are of the most important factors limiting the production of crops. Moreover, with the increasing population of the planet and saline fields worldwide there is no choice but to use saline soil and water in the near future. Therefore, to increase plant growth under saline stress condition, provision of sustainable and environmentally friendly management for the use of sa…	Rejected	Review
APX' + 'gene express'+ 'abiotic stress' + ' plants'+ 'PGPR'	Google scholar	Impact of co-inoculation with plant-growth-promoting rhizobacteria and rhizobium on the biochemical responses of alfalfa-soil system in copper contaminated soil	Ju et al., 2019	The effects and regulatory mechanisms of co-inoculation of plant-growth-promoting rhizobacteria (PGPRs) and rhizobium in plant-soil systems remain unclear, despite numerous reports that PGPRs or rhizobium can alleviate metal toxicity. We used the co-inoculation of the PGPR Paenibacillus mucilaginosus and the metal-resistant rhi- zobium Sinorhizobium meliloti for exploring the physiological and bi…	Rejected	Proteomic study
APX' + 'gene express'+ 'abiotic stress' + ' plants'+ 'PGPR'	Google scholar	Can plant bio-regulators minimize crop productivity losses caused by drought, salinity and heat stress? An integrated review	Ratnakumar et al., 2016	Plant bio-regulators (PBRs), are biochemical compounds stimulates plant growth and productivity when applied, even in small quantities at appropriate plant growth stages. These are being extensively used in agriculture to enhance the productivity particularly in horticultural crops but are not as prevalent in field crops. Their central role in plant growth and development is through nutrient allo…	Rejected	Review
APX' + 'gene express'+ 'abiotic stress' + ' plants'+ 'PGPR'	Google scholar	Staphylococcus sciuri SAT-17 improved the growth of salt stressed maize (Zea mays L.) by modulated expression of stress responsive genes and anti-oxidative defence mechanisms	Sohailakramet al.,2021	Plant growth promoting rhizobacteria (PGPRs), being the chief components of rhizosphere microbiota, are highly beneficial for plant growth and production. PGPR mediated salt stress tolerance is an intricate process which is governed by plant- bacterial interactions at molecular level. In an earlier study, positive impact of Staphylococcus scuiri SAT-17 inoculation on maize growth and physiology, …	Rejected	No drought stress
APX' + 'gene express'+ 'abiotic stress' + ' plants'+ 'PGPR'	Google scholar	Plant-Growth-Promoting Rhizobacteria Emerging as an Effective Bioinoculant to Improve the Growth, Production, and Stress Tolerance of Vegetable Crops	Kumar et al., 2021	Vegetable cultivation is a promising economic activity, and vegetable consumption is important for human health due to the high nutritional content of vegetables. Vegetables are rich in vitamins, minerals, dietary fiber, and several phytochemical compounds. However, the production of vegetables is insufficient to meet the demand of the ever-increasing population. Plant-growth- promoting rhizobact…	Rejected	Review
APX' + 'gene express'+ 'abiotic stress' + ' plants'+ 'PGPR'	Google scholar	Water stress amelioration and plant growth promotion in wheat plants by osmotic stress tolerant bacteria	Chakraborty et al., 2013	Soil microorganisms with potential for allevi- ation of abiotic stresses in combination with plant growth promotion would be extremely useful tools in sustainable agriculture. To this end, the present study was initiated where forty-five salt tolerant bacterial isolates with ability to grow in high salt medium were obtained from the rhizosphere of Triticum aestivum and Imperata cylindrica. These …	rejected	No APX
APX' + 'gene express'+ 'abiotic stress' + ' plants'+ 'PGPR'	Google scholar	Approaches to Enhancing Antioxidant Defense in Plants	Fujita et al., 2022		Rejected	Incomplete article
APX' + 'gene express'+ 'abiotic stress' + ' plants'+ 'PGPR'	Google scholar	Biochemical Characterization of Halotolerant Bacillus safensis PM22 and Its Potential to Enhance Growth of Maize under Salinity Stress	Azeem et al., 2022	Salinity stress is one of the primary abiotic stresses limiting crop growth and yield. Plants respond to salinity stress with several morphophysiological, molecular, and biochemical mecha- nisms, however, these mechanisms need to be improved further to cope with salt stress effectively. In this regard, the use of plant growth-promoting (PGP) and halotolerant bacteria is thought to be very efficie…	Rejected	Proteomic study
APX' + 'gene express'+ 'abiotic stress' + ' plants'+ 'PGPR'	Google scholar	Biofertilizers function as key player in sustainable agriculture by improving soil fertility, plant tolerance and crop productivity	Bhardwaj et al., 2014	Current soil management strategies are mainly dependent on inorganic chemical-based fertilizers, which caused a serious threat to human health and environment. The exploitation of beneficial microbes as a biofertilizer has become paramount importance in agriculture sector for their potential role in food safety and sustainable crop production. The eco-friendly approaches inspire a wide range of a…	Rejected	Review
APX' + 'gene express'+ 'abiotic stress' + ' plants'+ 'PGPR'	Google scholar	Exiguobacterium oxidotolerans, a halotolerant plant growth promoting rhizobacteria, improves yield and content of secondary metabolites in Bacopa monnieri (L.) Pennell under primary and secondary salt stress	Bharti et al., 2013	Brahmi (Bacopa monnieri), an integral component of Indian Ayurvedic medicine system, is facing a threat of extinction owing to the depletion of its natural populations. The present study investigates the prospective of exploitation of halotolerant plant growth promoting rhizobacteria (PGPR) in utilising the salt stressed soils for cultivation of B. monnieri. The effects of two salt tolerant PGPR,…	Rejected	No APX
APX' + 'gene express'+ 'abiotic stress' + ' plants'+ 'PGPR'	Google scholar	Individual and Synergic Effects of Phosphorus and Gibberellic Acid on Organic Acids Exudation Pattern, Ultra‐Structure of Chloroplast and Stress Response Gene Expression in Cu‐Stressed Jute (Corchorus Capsularis L.)	Alatawi et al., 2022	Copper (Cu) pollution in agricultural soils is considered as a serious health risk due to its accumulation in plants. Thus, there is an urgent need to optimize nutrient application for higher yield with lower Cu uptake to ensure food security. A pot experi- ment was conducted to determine the effects of single and/or combined application of different levels (0 and 80 kg ha−1) of phosphorus (P) an…	Rejected	No PGPR
APX' + 'gene express'+ 'abiotic stress' + ' plants'+ 'PGPR'	Google scholar	Differential gene expression profiling through transcriptome approach of Saccharum spontaneum L. under low temperature stress reveals genes potentially involved in cold acclimation	Selvarajan et al., 2018	Sugarcane (Saccharum sp.) is predominantly grown in both tropics and subtropics in India, and the subtropics alone contribute more than half of sugarcane production. Sugarcane active growth period in subtropics is restricted to 8–9 months mainly due to winter’s low temperature stress prevailing during November to February every year. Being a commercial crop, toler- ance to low temperature is impo…	Rejected	Proteomic study
APX' + 'gene express'+ 'abiotic stress' + ' plants'+ 'PGPR'	Google scholar	EFFECT OF Bacillus sp AND Glomus monosporum ON GROWTH AND ANTIOXIDANT ACTIVITY OF BELL PEPPER (Capsicum annuum) UNDER SALINITY STRESS	RAYAVARAPU et al., 2016	Salinity is an abiotic stress that adversely affects the plant growth and crop productivity. The present study examined the effect of co inoculation of Bacillus sp and G. monosporum on phenotypic characters, chlorophyll, polyphenol oxidase and antioxidant enzymes including Ascorbate peroxide (APX), Superoxide dismutase (SOD), Catalase (CAT) under three salinity stress levels: 1.5, 7.0 and 12.5 ds…	Rejected	Proteomic study
APX' + 'gene express'+ 'abiotic stress' + ' plants'+ 'PGPR'	Google scholar	Effect of inoculation with a thermotolerant plant growth promoting Pseudomonas putida strain AKMP7 on growth of wheat (Triticum spp.) under heat stress	Ali et al., 2011	The present study was carried out to investigate the effect of plant growth promoting thermotolerant Pseudomonas putida strain AKMP7 on the growth of wheat plants to heat stress. The results indicated the superior performance by P. putida strain AKMP7 in improving survival and growth of wheat plants under heat stress. The bacterium significantly increased the root and shoot length, dry biomass, t…	Rejected	Proteomic study
APX' + 'gene express'+ 'abiotic stress' + ' plants'+ 'PGPR'	Google scholar	Paenibacillus lentimorbus induces autophagy for protecting tomato from Sclerotium rolfsii infection	Dixit et al., 2018	During biotic stress, plants use several mechanisms to protect themselves that include the production of reactive oxygen species (ROS), induction of pathogenesis-related proteins and cell death. Some plant growth promoting rhizobacteria (PGPR) are known to act as bio-control agents that protect crops against pathogens. The biocontrol activity of PGPR Paenibacillus lentimorbus (B-30488) against Sc…	Rejected	Biotic stress
APX' + 'gene express'+ 'abiotic stress' + ' plants'+ 'PGPR'	Google scholar	The Potential Application of Endophytes in Management of Stress from Drought and Salinity in Crop Plants	Verma et al., 2021	Endophytic microorganisms present inside the host plant play an essential role in host fitness, nutrient supply and stress tolerance. Endophytes are often used in sustainable agriculture as biofertilizers, biopesticides and as inoculants to mitigate abiotic stresses including salinity, drought, cold and pH variation in the soil. In changing climatic conditions, abiotic stresses create global chal…	Rejected	review
APX' + 'gene express'+ 'abiotic stress' + ' plants'+ 'PGPR'	Google scholar	Gluconacetobacter diazotrophicus mitigates drought stress in Oryza sativa L.	Filgueiras et al., 2020	Background and aims Plant growth promoting bacteria (PGPB) are associated with plant roots and augment plant productivity and immunity; however, recent work by sev- eral groups has shown that PGPB also elicit the so-called “induced systemic tolerance” to drought stress. This work aimed to evaluate the effect of Gluconacetobacter diazotrophicus Pal5 inoculation on the mitigation of drought stress …	Rejected	Proteomic study
APX' + 'gene express'+ 'abiotic stress' + ' plants'+ 'PGPR'	Google scholar	Mechanistic insights of plant-microbe interaction towards drought and salinity stress in plants for enhancing the agriculture productivity	Gupta et al., 2022	The agricultural sector is an important part of the Indian economy. The sector is challenged by various stresses, leading to huge loss in crop productivity globally and disturbs agricultural sustainability. Abiotic stresses (drought and salinity) are among the foremost ecological factors that hinder agricultural productivity globally. Several ecological stresses generate excess amounts of reactiv…	Rejected	review
APX' + 'gene express'+ 'abiotic stress' + ' plants'+ 'PGPR'	Google scholar	Bacterial-Mediated Induction of Systemic Tolerance to Salinity with Expression of Stress Alleviating Enzymes in Soybean (Glycine max L. Merrill)	Kumari et al., 2015	This study explored several features related to salt tolerance in soybean plants through plant growth-promoting rhizobacteria (PGPR; Pseudomonas sp. strain AK- 1, and Bacillus sp. strain SJ-5). We report the significant effect of 1-aminocyclopropane-1-carboxylate deaminase, indole-3-acetic acid production and exopolysaccharide production from both bacterial strains on physical pa- rameters and bi…	Rejected	No APX
APX' + 'gene express'+ 'abiotic stress' + ' plants'+ 'PGPR'	Google scholar	Root colonizing Burkholderia sp. AQ12 enhanced rice growth and upregulated tillering-responsive genes in rice	Maqsood et al., 2021	Association of 1-aminocyclo propane-1-carboxylate (ACC) deaminase producing bacteria with plants under abiotic stress conditions leads to stress alleviation not only by the regulation of ethylene concentration but also by the activation of numerous physiological and genetic mechanisms in plants. The objective of the current study was to evaluate the inoculation response of a plant-beneficial bact…	Rejected	Proteomic study
APX' + 'gene express'+ 'abiotic stress' + ' plants'+ 'PGPR'	Google scholar	Strategy of Salt Tolerance and Interactive Impact of Azotobacter chroococcum and/or Alcaligenes faecalis Inoculation on Canola (Brassica napus L.) Plants Grown in Saline Soil	Latef et al., 2021	A pot experiment was designed and performed in a completely randomized block de- sign (CRBD) to determine the main effect of two plant growth-promoting rhizobacteria (PGPR) and their co-inoculation on growth criteria and physio-biochemical attributes of canola plants (Brassica napus L.) plant grown in saline soil. The results showed that inoculation with two PGPR (Azotobacter chroococcum and/or A…	Rejected	Proteomic study
APX' + 'gene express'+ 'abiotic stress' + ' plants'+ 'PGPR'	Google scholar	Plant Growth Promoting Rhizobacterial Mitigation of Drought Stress in Crop Plants: Implications for Sustainable Agriculture	Ojuederie et al., 2019	Abiotic stresses arising from climate change negates crop growth and yield, leading to food insecurity. Drought causes oxidative stress on plants, arising from excessive production of reactive oxygen species (ROS) due to inadequate CO2, which disrupts the photosynthetic machinery of plants. The use of conventional methods for the development of drought-tolerant crops is time-consuming, and the fu…	Rejected	Review
APX' + 'gene express'+ 'abiotic stress' + ' plants'+ 'PGPR'	Google scholar	Plant Growth-Promoting Bacillus sp. Cahoots Moisture Stress Alleviation in Rice Genotypes by Triggering Antioxidant Defense System	Narayanasamy et al., 2020	Drought is considered one of the major obstacles for agricultural productivity worldwide such that greater efforts are required to boost crop production under this stress. One of the methods to overcome this obstacle is to harness the potential of microbe-induced systemic tolerance against moisture stress. The present work evaluated the potential role of two bacterial strains, namely Bacillus alt…	Rejected	Proteomic study
APX' + 'gene express'+ 'abiotic stress' + ' plants'+ 'PGPR'	Google scholar	Transcriptome profiling of genes involved in induced systemic salt tolerance conferred by Bacillus amyloliquefaciens FZB42 in Arabidopsis thaliana	Liu et al., 2016	Plant growth-promoting Bacillus amyloliquefaciens FZB42 induces systemic salt tolerance in Arabidopsis and enhances the fresh and dry weight. However, the underlying molecular mechanism that allows plants to respond to FZB42 and exhibit salt tolerance is largely unknown. Therefore, we performed large-scale transcriptome sequencing of Arabidopsis shoot tissues grown under salt stress with or witho…	Rejected	Proteomic study
APX' + 'gene express'+ 'abiotic stress' + ' plants'+ 'PGPR'	Google scholar	Differential gene expression profiling through transcriptome approach of Saccharum spontaneum L. under low temperature stress reveals genes potentially involved in cold acclimation	Selvarajan et al., 2018	Sugarcane (Saccharum sp.) is predominantly grown in both tropics and subtropics in India, and the subtropics alone contribute more than half of sugarcane production. Sugarcane active growth period in subtropics is restricted to 8–9 months mainly due to winter’s low temperature stress prevailing during November to February every year. Being a commercial crop, toler- ance to low temperature is impo…	Rejected	No PGPR
APX' + 'gene express'+ 'abiotic stress' + ' plants'+ 'PGPR'	Google scholar	Effect of Azospirillum Lectins on the Ascorbate Peroxidase Activity and Ascorbic Acid Content in Wheat Seedling Roots Exposed to Abiotic Stresses	Alen’kina et al., 2020	We examined the effect of lectins from two Azospirillum strains (the epiphyte A. brasilense Sp7 and the endophyte A. brasilense Sp245) on the ascorbate peroxidase activity and ascorbic acid content in roots of etiolated wheat (Triticum aestivum L.) seedlings under simulated abiotic stresses: hypothermic (5°С) and hyperthermic (42°С) stress, salinity (1% NaCl), drought (5% sucrose), and heavy meta…	Rejected	Proteomic study
APX' + 'gene express'+ 'abiotic stress' + ' plants'+ 'PGPR'	Google scholar	Drought stress amelioration in wheat through inoculation with Burkholderia phytofirmans strain PsJN	Naveed et al., 2014	Plant growth promoting endophytic bacteria Burkholderia phytofirmans PsJN was used to investigate the potential to ameliorate the effects of drought stress on growth, physiology and yield of wheat (Triticum aestivum L.) under natural field conditions. Inoculated and uninoc- ulated (control) seeds of wheat cultivar Sahar 2006 was sown in the field. The plants were exposed to drought stress at diff…	Rejected	Proteomic study
APX' + 'gene express'+ 'abiotic stress' + ' plants'+ 'PGPR'	Google scholar	Insights Into Microbially Induced Salt Tolerance and Endurance Mechanisms (STEM) in Plants	Kaushal et al., 2020	Salt stress threatens the achievement of sustainable global food security goals by inducing secondary stresses, such as osmotic, ionic, and oxidative stress, that are detrimental to plant growth and productivity. Various studies have reported the beneficial roles of microbes in ameliorating salt stress in plants. This review emphasizes salt tolerance and endurance mechanisms (STEM) in microbially…	Rejected	review
APX' + 'gene express'+ 'abiotic stress' + ' plants'+ 'PGPR'	Google scholar	The Foliar Application of Rice Phyllosphere Bacteria induces Drought-Stress Tolerance in Oryza sativa (L.)	Devarajan et al., 2021	This study assessed the potential of Bacillus endophyticus PB3, Bacillus altitudinis PB46, and Bacillus megaterium PB50 to induce drought tolerance in a susceptible rice cultivar. The leaves of the potted rice plants subjected to physical drought stress for 10 days during the flowering stage were inoculated with single-strain suspensions. Control pots of irrigated and drought-stressed plants were…	Rejected	Proteomic study
APX' + 'gene express'+ 'abiotic stress' + ' plants'+ 'PGPR'	Google scholar	Proposed some interactions at molecular level of PGPR coinoculated with Bradyrhizobium diazoefficiens USDA110 and B. japonicum THA6 on soybean symbiosis and its potential of field application	Prakamhang et al., 2015	The objectives of this research were to select the appropriate plant growth promoting rhizobacteria (PGPR) and evaluate their influence in promoting nodulation and N2-fixing efficiency of soybean (Glycine max) by coinoculation with Bradyrhizobium diazoefficiens USDA110 and B. japonicum THA6 strains. Selected 12 PGPR performed a significant capability of promoting N2-fixation, nodule number, nodul…	Rejected	No PGPR
APX' + 'gene express'+ 'abiotic stress' + ' plants'+ 'PGPR'	Google scholar	Synergistic effects of plant defense elicitors and Trichoderma harzianum on enhanced induction of antioxidant defense system in tomato against Fusarium wilt disease	Zehra et al., 2017	Plant defense against their pathogens can be induced by a complex network of different inducers. The present study investigates the synergistic effect of Trichoderma harzianum, exogenous salicylic acid (SA) and methyl jasmonate (MeJA) over the response and regulation of the antioxidant defense mechanisms and lipid peroxidation in tomato plants against Fusarium wilt disease. In the present work, t…	Rejected	Biotic stress
APX' + 'gene express'+ 'abiotic stress' + ' plants'+ 'PGPR'	Google scholar	Positive Salt Tolerance Modulation via Vermicompost Regulation of SOS1 Gene Expression and Antioxidant Homeostasis in Vicia faba Plant	El-Dakak et al., 2021	Strategic implementation of vermicompost as safe biofertilizer besides defensing saline soils offer dual function solving problems in developing countries. The current study aims to utilize vermicompost (VC) for amelioration of 200mM NaCl in Vicia faba Aspani cultivar and investigate the molecular role of salt overly sensitive pathway (SOS1). The experiment was conducted following a completely ra…	Rejected	No PGPR
APX' + 'gene express'+ 'abiotic stress' + ' plants'+ 'PGPR'	Google scholar	PGPR strain Paenibacillus polymyxa SQR-21 potentially benefits watermelon growth by re-shaping root protein expression	E et al., 2017		Rejected	Duplicate
APX' + 'gene express'+ 'abiotic stress' + ' plants'+ 'PGPR'	Google scholar	N-acyl homoserine lactone Mediated Quorum Sensing Exhibiting Plant Growth-promoting and Abiotic Stress Tolerant Bacteria Demonstrates Drought Stress Amelioration	Singh et al., 2022	Multiple plant growth-promoting attributes with N-acyl homoserine lactone (AHL)-mediated quorum sensing exhibiting bacterial strains can help plants to withstand varying abiotic and biotic stress conditions for improving the plant health and productivity. In total, 306 bacterial isolates were isolated from diverse locations and sites. In our exploration, bacterial isolates were screened based on …	rejected	Proteomic study
APX' + 'gene express'+ 'abiotic stress' + ' plants'+ 'PGPR'	Google scholar	Bacterial Mitigation of Drought Stress in Plants: Current Perspectives and Future Challenges	Kour et al., 2022	Climate change is emerging as a crucial issue with global attention and leading to abiotic stress conditions. There are different abiotic stress which affects the crop production among which drought is known to be most destructive stress affecting crop productivity and world’s food security. Different approaches are under consideration to increase adaptability of the plants under drought stress w…	Rejected	Review
APX' + 'gene express'+ 'abiotic stress' + ' plants'+ 'PGPR'	Google scholar	Recent advances in physiological and molecular mechanisms of heavy metal accumulation in plants	Feki et al., 2021	Among abiotic stress, the toxicity of metals impacts negatively on plants’ growth and productivity. This toxicity promotes various perturbations in plants at different levels. To withstand stress, plants involve efficient mechanisms through the impli- cation of various signaling pathways. These pathways enhance the expression of many target genes among them gene coding for metal transporters. Var…	Rejected	Review
APX' + 'gene express'+ 'abiotic stress' + ' plants'+ 'PGPR'	Google scholar	Silymarin-Enriched Biostimulant Foliar Application Minimizes the Toxicity of Cadmium in Maize by Suppressing Oxidative Stress and Elevating Antioxidant Gene Expression	Alharby et al., 2021	For maize, the potential preventive role of foliar spraying with an extract derived from maize grain (MEg, 2%), silymarin (Sm, 0.5 mM), or silymarin-enriched MEg (MEg-Sm) in attenuating the stress effects of cadmium (Cd, 0.5 mM) was examined using a completely randomized design layout. Under normal conditions, foliar spraying with MEg, Sm, or MEg-Sm was beneficial (with MEg- Sm preferred) for mai…	Rejected	No PGPR
APX' + 'gene express'+ 'abiotic stress' + ' plants'+ 'PGPR'	Google scholar	Plant Growth Promoting Rhizobacteria for Sustainable Stress Management	Ahmed et al., 2019		Rejected	Book
APX' + 'gene express'+ 'abiotic stress' + ' plants'+ 'PGPR'	Google scholar	Overexpression of LcSABP, an Orthologous Gene for Salicylic Acid Binding Protein 2, Enhances Drought Stress Tolerance in Transgenic Tobacco	Li et al., 2019	Salicylic acid (SA) plays an essential role in the growth and development of plants, and in their response to abiotic stress. Previous studies have mostly focused on the effects of exogenously applied SA on the physiological response of plants to abiotic stresses; however, the underlying genetic mechanisms for the regulatory functions of endogenous SA in the defense response of plants remain uncl…	Rejected	No PGPR
APX' + 'gene express'+ 'abiotic stress' + ' plants'+ 'PGPR'	Google scholar	Comparative physiological and Metabolic Analysis Reveals a Complex Mechanism Involved in Drought tolerance in Chickpea (Cicer arietinum L.) Induced by pGpR and pGRs	Khan et al., 2019	the plant growth promoting rhizobacteria (pGpR) and plant growth regulators (pGRs) can be applied to improve the growth and productivity of plants, with potential to be used for genetic improvement of drought tolerance. However, for genetic improvement to be achieved, a solid understanding of the physiological and biochemical changes in plants induced by pGpR and pGR is required. the present stud…	Rejected	Proteomic study
APX' + 'gene express'+ 'abiotic stress' + ' plants'+ 'PGPR'	Google scholar	The Combined Effects of Rhizobacteria and Methyl Jasmonate on Rosmarinic Acid Production and Gene Expression Profile in Origanum Vulgare l. Under Salinity Conditions	Jafari et al., 2022	Origanum vulgare L. is a valuable flavoring, mainly due to its important essential oils and is widely used in different industries. This study aimed to compare the expression level of genes coding for proteins involved in rosmarinic acid (RA) biosynthesis pathway and some physiological responses in O. vulgare under two levels of salinity (2, 4 decisiemens/meter (dS/m), and 0 as a control), two le…	Rejected	No APX
APX' + 'gene express'+ 'abiotic stress' + ' plants'+ 'PGPR'	Google scholar	Plant Growth Promoting Rhizobacteria (PGPR): A Sustainable Agriculture to Rescue the Vegetation from the Effect of Biotic Stress: a Review	Gupta et al., 2021	Many biotic agents such as bacteria, viruses, nematodes, arachnids, and weeds encounter the plants. These entities induce biotic stress in their hosts with the aid of disrupting normal metabolism, resulting in limited plant growth and causing plant mortality. As Arbuscular Mycorrhizal Fungi (AMF), plant-associated microbes can regulate physiological and molecular responses to cope with pathogenic…	Rejected	review
APX' + 'gene express'+ 'abiotic stress' + ' plants'+ 'PGPR'	Google scholar	Bacillus aryabhattai SRB02 tolerates oxidative and nitrosative stress and promotes the growth of soybean by modulating the production of phytohormones	Park et al., 2017	Plant growth promoting rhizobacteria (PGPR) are diverse, naturally occurring bacteria that establish a close association with plant roots and promote the growth and immunity of plants. Established mechanisms involved in PGPR-mediated plant growth promotion include regulation of phytohormones, improved nutrient availability, and antagonistic effects on plant pathogens. In this study, we isolated a…	Rejected	proteomic study
APX' + 'gene express'+ 'abiotic stress' + ' plants'+ 'PGPR'	Google scholar	Azospirillum: benefits that go far beyond biological nitrogen fixation	Fukami et al., 2018	The genus Azospirillum comprises plant-growth-promoting bacteria (PGPB), which have been broadly studied. The benefits to plants by inoculation with Azospirillum have been primarily attributed to its capacity to fix atmospheric nitrogen, but also to its capacity to synthesize phytohormones, in particular indole-3-acetic acid. Recently, an increas- ing number of studies has attributed an important…	Rejected	Review
APX' + 'gene express'+ 'abiotic stress' + ' plants'+ 'PGPR'	Google scholar	Halotolerant bacteria mitigate the effects of salinity stress on soybean growth by regulating secondary metabolites and molecular responses	Khan et al., 2021	Salinity is a major threat to the agriculture industry due to the negative impact of salinity stress on crop productivity. In the present study, we isolated rhizobacteria and evaluated their capacities to promote crop growth under salt stress conditions. Results: We isolated rhizospheric bacteria from sand dune flora of Pohang beach, Korea, and screened them for plant growth-promoting (PGP) trait…	Rejected	No APX
APX' + 'gene express'+ 'abiotic stress' + ' plants'+ 'PGPR'	Google scholar	Plant, Soil and Microbes in Tropical Ecosystems	Rashid et al., 2021		Rejected	Book
APX' + 'gene express'+ 'abiotic stress' + ' plants'+ 'PGPR'	Google scholar	Priming fingerprint induced by Bacillus amyloliquefaciens QV15, a common pattern in Arabidopsis thaliana and in field-grown blackberry	Gutierrez Albanchez et al., 2018	The aim of this study is focused on determining the Bacillus amyloliquefaciens QV15 priming fingerprint in two different plant species, Arabidopsis and blackberry as a crop of agronomic interest, associated with protection upon pathogen challenge. To achieve this goal, Arabidopsis thaliana plants were challenged with Pseudomonas syringae DC3000 under controlled conditions, and field-grown blackbe…	Rejected	No abiotic stress
APX' + 'gene express'+ 'abiotic stress' + ' plants'+ 'PGPR'	Google scholar	Reducing the allelopathic effect of Parthenium hysterophorus L. on wheat (Triticum aestivum L.) by Pseudomonas putida	Mishra et al., 2012	The present study evaluates the role of Pseu- domonas putida NBRIC19 in alleviating biotic stress of Parthenium hysterophorus (Parthenium) in Triticum aestivum. Due to presence of Parthenium there was 43.76, 53.08 and 78.65% inhibition in root length, shoot length and dry weight of wheat respectively. This inhibition was recovered when P. putida NBRIC19 treatment resulted in 52.29, 28.73 and 76.3…	Rejected	biotic stress
APX' + 'gene express'+ 'abiotic stress' + ' plants'+ 'PGPR'	Google scholar	Interaction between Grasses and Epichloë Endophytes and Its Significance to Biotic and Abiotic Stress Tolerance and the Rhizosphere	Lee et al., 2021	Cool-season grasses are the most common forage types in livestock operations and ameni- ties. Several of the cool-season grasses establish mutualistic associations with an endophytic fungus of the Epichloë genus. The grasses and endophytic fungi have evolved over a long period of time to form host-fungus specific relationships that confer protection for the grass against various stressors in exch…	rejected	Review
APX' + 'gene express'+ 'abiotic stress' + ' plants'+ 'PGPR'	Google scholar	Drought‐tolerant Bacillus megaterium isolated from semi‐arid conditions induces systemic tolerance of wheat under drought conditions	Rashid et al., 2022	Drought stress, a major challenge under current climatic conditions, adversely affects wheat productivity. In the current study, we observed the response of wheat plants, inoculated with drought-tolerant plant growth-promoting rhizo- bacteria (PGPR) Bacillus megaterium (MU2) and Bacillus licheniformis (MU8) under induced drought stress. In vitro study of 90 rhizobacteria exhibited 38 isolates sho…	rejected	Proteomic study
APX' + 'gene express'+ 'abiotic stress' + ' plants'+ 'PGPR'	Google scholar	Gibberellin-producing Serratia nematodiphila PEJ1011 ameliorates low temperature stress in Capsicum annuum L.	Kang et al., 2015	We studied the effects of plant growth-promoting rhizobacteria (PGPR) on the physio-hormonal attri- butes of pepper (Capsicum annuum L.) plants grown under low-temperature stress. After initial screening for growth promoting effect on gibberellin (GA) mutant Waito-C rice seeds, the PGPRs were analysed for gibberellins (GA) production through advanced chromatographic and spectroscopic techniques. …	rejected	No APX
APX' + 'gene express'+ 'abiotic stress' + ' plants'+ 'PGPR'	Google scholar	The stimulatory effects of plant growth promoting rhizobacteria and plant growth regulators on wheat physiology grown in sandy soil	Khan et al., 2019	The present study was aimed to investigate the effects of plant growth promoting rhizobacteria (PGPR) and plant growth regulators (PGRs) on the physiology and yield of wheat grown in less fertile sandy soil. The isolated PGPR strains were identified by 16S-rRNA gene sequencing as Planomicrobium chinense (P1), Bacillus cereus (P2) and Pseudomonas fluore- scens (P3). Wheat varieties (Galaxy-13 and …	Rejected	No APX
APX' + 'gene express'+ 'abiotic stress' + ' plants'+ 'PGPR'	Google scholar	Seed Priming with Phytohormones: An Effective Approach for the Mitigation of Abiotic Stress	Rhaman et al., 2020	Plants are often exposed to abiotic stresses such as drought, salinity, heat, cold, and heavy metals that induce complex responses, which result in reduced growth as well as crop yield. Phy- tohormones are well known for their regulatory role in plant growth and development, and they serve as important chemical messengers, allowing plants to function during exposure to various stresses. Seed prim…	Rejected	review
APX' + 'gene express'+ 'abiotic stress' + ' plants'+ 'PGPR'	Google scholar	Bacterial Plant Biostimulants: A Sustainable Way towards Improving Growth, Productivity, and Health of Crops	Hamid et al.,2021		Rejected	Duplicate
APX' + 'gene express'+ 'abiotic stress' + ' plants'+ 'PGPR'	Google scholar	Effect of plant growth-promoting Rhizobacteria on plant hormone homeostasis	Tsukanova et al., 2017	Plant growth-promoting rhizobacteria (PGPR) includes a wide variety of bacterial strains from different taxo- nomic groups that inhabit plant roots and their rhizosphere. By bringing about complex changes in plant growth and development, PGPR can enhance both productivity of agricultural crops, and their pathogen resistance. Col- onization by PGPR is associated with changes in plant metabolism, s…	Rejected	Review
APX' + 'gene express'+ 'abiotic stress' + ' plants'+ 'PGPR'	Google scholar	Use of plant growth-promoting bacteria to enhance salinity stress in soybean (Glycine max L.) plants	Abulfaraj et al., 2021	The effects of three rhizobacterial isolates namely Pseudomonas fluorescens (M1), Pseudomonas putida (M2) and Bacillus subtilis (M3) were examined to enhance growth and chemical components such as chlorophyll and proline of three cultivars of soybean (Glycine max L.) under two levels of salinity stress (S1 = 200 mM and S2 = 400 mM of NaCl salt). Several morphological and physiological parameters …	Rejected	Proteomic study
APX' + 'gene express'+ 'abiotic stress' + ' plants'+ 'PGPR'	Google scholar	Transcription Factors Interact with ABA through Gene Expression and Signaling Pathways to Mitigate Drought and Salinity Stress	Hussain et al., 2021	Among abiotic stressors, drought and salinity seriously affect crop growth worldwide. In plants, research has aimed to increase stress-responsive protein synthesis upstream or downstream of the various transcription factors (TFs) that alleviate drought and salinity stress. TFs play diverse roles in controlling gene expression in plants, which is necessary to regulate biological processes, such as…	Rejected	Review
APX' + 'gene express'+ 'abiotic stress' + ' plants'+ 'PGPR'	Google scholar	Plant Growth Promoting Rhizobacteria for Agricultural Sustainability	İpek et al., 2019		Rejected	Book
APX' + 'gene express'+ 'abiotic stress' + ' plants'+ 'PGPR'	Google scholar	Microbe-mediated amelioration of salinity stress in plants	Phurailatpam et al., 2021	Salinity, one of the major abiotic stresses faced by crop plants, is responsible for causing >20% loss in crop productivity worldwide. The elevated salt ion concentration (mainly Na+ and Cl-) in soil or water creates osmotic stress, oxidative stress and ion toxicity in plant cells. Salinity stress affects plant growth, development and survival by hampering seed germination, photosynthesis, water …	Rejected	Review
APX' + 'gene express'+ 'abiotic stress' + ' plants'+ 'PGPR'	Google scholar	Arbuscular mycorrhiza effects on plant performance under osmotic stress	Santander et al., 2017	At present, drought and soil salinity are among the most severe environmental stresses that affect the growth of plants through marked reduction of water uptake which lowers water potential, leading to osmotic stress. In general, osmotic stress causes a series of morphological, physiological, biochemical, and molecular changes that affect plant perfor- mance. Several studies have found that diver…	Rejected	Review
APX' + 'gene express'+ 'abiotic stress' + ' plants'+ 'PGPR'	Google scholar	Exogenous Application of Alpha-Lipoic Acid Mitigates Salt-Induced Oxidative Damage in Sorghum Plants through Regulation Growth, Leaf Pigments, Ionic Homeostasis, Antioxidant Enzymes, and Expression of Salt Stress Responsive Genes	Youssef et al., 2021	In plants, α-Lipoic acid (ALA) is considered a dithiol short-chain fatty acid with several strong antioxidative properties. To date, no data are conclusive regarding its effects as an exogenous application on salt stressed sorghum plants. In this study, we investigated the effect of 20 μM ALA as a foliar application on salt-stressed sorghum plants (0, 75 and 150 mM as NaCl). Under saline conditio…	Rejected	No PGPR
APX' + 'gene express'+ 'abiotic stress' + ' plants'+ 'PGPR'	Google scholar	Bacillus: A Biological Tool for Crop Improvement through Bio-Molecular Changes in Adverse Environments	Radhakrishnan et al., 2017	Crop productivity is affected by environmental and genetic factors. Microbes that are beneficial to plants are used to enhance the crop yield and are alternatives to chemical fertilizers and pesticides. Pseudomonas and Bacillus species are the predominant plant growth-promoting bacteria. The spore-forming ability of Bacillus is distinguished from that of Pseudomonas. Members of this genus also su…	Rejected	Review
APX' + 'gene express'+ 'abiotic stress' + ' plants'+ 'PGPR'	Google scholar	ROS and Oxidative Response Systems in Plants Under Biotic and Abiotic Stresses: Revisiting the Crucial Role of Phosphite Triggered Plants Defense Response	Mohammadi et al., 2021	Phosphite (Phi) is a chemical analog of orthophosphate [HPO43−]. It is a systemic pesticide generally known to control the prevalence of oomycetes and soil-borne diseases such as Phytophthora, Pythium, and Plasmopora species. Phi can also control disease symptoms and the spread of pathogenic bacteria, fungi, and nematodes. Phi plays critical roles as a fungicide, pesticide, fertilizer, or biostim…	Rejected	Review
APX' + 'gene express'+ 'abiotic stress' + ' plants'+ 'PGPR'	Google scholar	An Insight into Abiotic Stress and Influx Tolerance Mechanisms in Plants to Cope in Saline Environments	Gul et al., 2022	This review focuses on plant growth and development harmed by abiotic stress, primarily salt stress. Salt stress raises the intracellular osmotic pressure, leading to hazardous sodium buildup. Plants react to salt stress signals by regulating ion homeostasis, activating the osmotic stress pathway, modulating plant hormone signaling, and altering cytoskeleton dynamics and cell wall composition. Un…	Rejected	Review
APX' + 'gene express'+ 'abiotic stress' + ' plants'+ 'PGPR'	Google scholar	Biochemical response and interactions between arbuscular mycorrhizal fungi and plant growth promoting rhizobacteria during establishment and stimulating growth of Arizona cypress (Cupressus arizonica G.) under drought stress	Aalipour et al., 2020	Arizona cypress is a major urban landscape tree many of which have declined in the recent years. Although the cause for this decline is complicated, drought is generally thought to be a leading factor. This study was designed to investigate the effects of artificial inoculation of seedlings of a major urban forest tree, Arizona cypress (Cupressus arizonica Green) with beneficial microorganisms un…	Rejected	Proteomic study
APX' + 'gene express'+ 'abiotic stress' + ' plants'+ 'PGPR'	Google scholar	Impact of Climate Change on Soil Carbon Exchange, Ecosystem Dynamics, and Plant_x0001_Microbe Interactions	Aamir et al., 2019		Rejected	Chapter book
APX' + 'gene express'+ 'abiotic stress' + ' plants'+ 'PGPR'	Google scholar	Effect of Piriformospora indica and Azotobacter chroococcum on mitigation of zinc deficiency stress in wheat (Triticum aestivum L.)	Abadi et al., 2016	Zinc deficiency is a global nutritional problem in agricultural soils in large number of countries, causing de- creased crop yields and grain nutritional quality. This study was conducted to investigate the effect of individual and co- inoculation of two plant-growth-promoting microorganisms (PGPMs); Azotobacter chroococcum and Piriformospora indica; on some physiological traits such as uptake of…	Rejected	Proteomic study
APX' + 'gene express'+ 'abiotic stress' + ' plants'+ 'PGPR'	Google scholar	Effect of plant growth promoting rhizobacteria (PGPR) on antioxidative enzymes of soybean subjected to different irrigation regimes	Abbasi et al., 2013	Drought is one of the main abiotic stresses affecting yield. The effect of inoculation of three plant growth promoting rhizobacteria (PGPR) that is Rhizobium japonicum, Azotobacter chroococcum and Azospirillum brasilense and mixture of them on antioxidant enzyme activity of soybean under different irrigation regimes was investigated. Drought stress was induced by irrigation withholding until 40, …	Rejected	No APX
APX' + 'gene express'+ 'abiotic stress' + ' plants'+ 'PGPR'	Google scholar	Streptomyces consortium improved quality attributes of bell pepper fruits, induced plant defense priming, and changed microbial communities of rhizosphere under commercial greenhouse conditions	Abbasi et al., 2022	Although many studies have shown the positive effect of PGPRs on the yield and quality characteristics of crops, only a few are successful in commercial greenhouses. This study aimed to evaluate the efficiency of PGP- Streptomyces in commercial greenhouse conditions. Greenhouse trials were done with four treatments including strains SS12, Y17, an effective combination of strains SS14 and IT20, an…	Rejected	No abiotic stress
APX' + 'gene express'+ 'abiotic stress' + ' plants'+ 'PGPR'	Google scholar	Enhancing systemic resistance in faba bean (Vicia faba L.) to Bean yellow mosaic virus via soil application and foliar spray of nitrogen-fixing Rhizobium leguminosarum bv. viciae strain 33504-Alex1	Abdelkhalek et al., 2022	Rhizobium spp. manifests strong nitrogen fixation ability in legumes. However, their significance as biocontrol agents and antivirals has rarely been investigated. Under greenhouse conditions, the molecularly identified nitrogen-fixing plant growth-promoting rhizobacteria (PGPR), Rhizobium leguminosarum bv. viciae strain 33504-Alex1, isolated from the root nodules of faba bean plants, was tested …	Rejected	Biotic stress
APX' + 'gene express'+ 'abiotic stress' + ' plants'+ 'PGPR'	Google scholar	Antioxidant systems responses and the compatible solutes as contributing factors to lead accumulation and tolerance in Lathyrus sativus inoculated by plant growth promoting rhizobacteria	Abdelkrim et al., 2018	Short-term lead (Pb) uptake by plants is important to better understand the mechanisms of metal uptake, plant tolerance and detoxification strategy. Thus we examined the response of Lathyrus sativus to 1 mM Pb application in hydroponic sorption kinetics at 24, 48 and 72 h, and we investigated the contribution of two inocula I1 (R. leguminosarum (M5) + B. simplex + Luteibacter sp + Variovorax sp) …	Rejected	Proteomic study
APX' + 'gene express'+ 'abiotic stress' + ' plants'+ 'PGPR'	Google scholar	Effect of Exogenously Applied Jasmonic Acid and Kinetin on Drought Tolerance of Wheat Cultivars Based on Morpho-Physiological Evaluation	Abeed et al., 2021	The population acceleration and better lifestyle submit new challenges for wheat researchers to breed wheat (Triticum sativum) cultivars with upgraded yield, quality, and resistance against abiotic stresses such as drought, so exploiting all available natural relatives of cultivated wheat and introducing even sensitive ones may be a useful approach to save time and efforts. Normally, the seedling…	Rejected	Proteomic study
APX' + 'gene express'+ 'abiotic stress' + ' plants'+ 'PGPR'	Google scholar	Medically Important Plant Biomes: Source of Secondary Metabolites	Abid et al., 2019		Rejected	Book
APX' + 'gene express'+ 'abiotic stress' + ' plants'+ 'PGPR'	Google scholar	Natural Biostimulant Attenuates Salinity Stress Effects in Chili Pepper by Remodeling Antioxidant, Ion, and Phytohormone Balances, and Augments Gene Expression	Abou-Sreea et al., 2021	A biostimulant is any microorganism or substance used to enhance the efficiency of nu- trition, tolerance to abiotic stress and/or quality traits of crops, depending on its contents from nutrients. Plant biostimulants like honey bee (HB) and silymarin (Sm) are a strategic trend for managing stressed crops by promoting nutritional and hormonal balance, regulating osmotic protectors, antioxidants, …	Rejected	Proteomic study
APX' + 'gene express'+ 'abiotic stress' + ' plants'+ 'PGPR'	Google scholar	Use of plant growth-promoting bacteria to enhance salinity stress in soybean (Glycine max L.) plants	Abulfaraj et al., 2021		Rejected	Duplicate
APX' + 'gene express'+ 'abiotic stress' + ' plants'+ 'PGPR'	Google scholar	SOS5 gene-abscisic acid crosstalk and their interaction with antioxidant system in Arabidopsis thaliana under salt stress	Acet et al., 2020	SOS5 locus, encodes cell wall adhesion protein under salt stress conditions in plants, and it is required for normal cell expansion as well as for sustaining cell wall integrity and structure. However, it is still unknown how this gene locus-ABA cross-talk and interacts with the antioxidant mechanism under salt stress conditions. For this purpose, the study focused on mutant sos5-1 plant treated …	Rejected	No PGPR
APX' + 'gene express'+ 'abiotic stress' + ' plants'+ 'PGPR'	Google scholar	Towards a Sustainable Agriculture: Strategies Involving Phytoprotectants against Salt Stress	Acosta-Motos et al., 2020	Salinity is one of the main constraints for agriculture productivity worldwide. This important abiotic stress has worsened in the last 20 years due to the increase in water demands in arid and semi-arid areas. In this context, increasing tolerance of crop plants to salt stress is needed to guarantee future food supply to a growing population. This review compiles knowledge on the use of phytoprot…	Rejected	Review
APX' + 'gene express'+ 'abiotic stress' + ' plants'+ 'PGPR'	Google scholar	Induction of tolerance to salinity in wheat genotypes by plant growth promoting endophytes: Involvement of ACC deaminase and antioxidant enzymes	Afridi et al., 2019	Plant growth-promoting endophytes (PGPEs) can colonize the internal tissues of plants and are capable of promoting plant growth. These bacteria can improve plant tolerance against various biotic and abiotic stresses via the expression of antioxidant enzymes and the production of 1-aminocyclopropane-1-carboxylate (ACC) deaminase. Two salt-tolerant PGPEs, Kocuria rhizophila: KF875448 (14ASP) and Cr…	Rejected	No APX
APX' + 'gene express'+ 'abiotic stress' + ' plants'+ 'PGPR'	Google scholar	Changes in physiological, phytochemical traits and gene expression of two Perovskia species in response to water deficit	Afshari et al., 2022	Perovskia species are considered as valuable ornamental plants. In the present study, the enzymatic and non- enzymatic antioxidants were evaluated in P. atriplicifolia, and P. abrotanoides in response to water deficit stress. The root harvesting was performed after 0, 3, 5, 7, and 9 days exposure to stress. In both species, total phenolics content, total flavonoids, enzymatic antioxidant activiti…	Rejected	No PGPR
APX' + 'gene express'+ 'abiotic stress' + ' plants'+ 'PGPR'	Google scholar	Exogenous application with plant growth promoting rhizobacteria (PGPR) or proline induces stress tolerance in basil plants (Ocimum basilicum L.) exposed to water stress	Agami et al., 2016	A pot experiment was conducted to investigate the effects of plant growth promoting rhizobacteria (PGPR) like Azotobacter chrocoocum A101, Pseudomonas fluorescens, pseudomonas mendocina Palleroni 1970 and Azospirillum lipoferum N040 or proline on growth traits, photosynthetic pigments, relative water content (RWC), electrolyte leakage percent (EL%), osmoprotectants such as proline and soluble sug…	Rejected	Proteomic study
APX' + 'gene express'+ 'abiotic stress' + ' plants'+ 'PGPR'	Google scholar	Karrikins: Smoke‐Derived Phytohormones from Stress Alleviation to Signaling	Ahmad et al., 2022	Plant-derived smoke is a source of several butenolide compounds collectively termed, karrikins (KARs). These have been recognized as a recent class of plant growth regulators associated with diverse phenomena especially seed germination, seedling vigor and other photo-morphogenetic responses. Role of KARs in improving the performance of plants exposed to different environmental constraints has be…	Rejected	Review
APX' + 'gene express'+ 'abiotic stress' + ' plants'+ 'PGPR'	Google scholar	Plant Growth-Promoting Rhizobacteria Eliminate the Effect of Drought Stress in Plants: A Review	Ahmad et al., 2022	Plants evolve diverse mechanisms to eliminate the drastic effect of biotic and abiotic stresses. Drought is the most hazardous abiotic stress causing huge losses to crop yield worldwide. Osmotic stress decreases relative water and chlorophyll content and increases the accumulation of osmolytes, epicuticular wax content, antioxidant enzymatic activities, reactive oxygen species, secondary metaboli…	Rejected	Review
APX' + 'gene express'+ 'abiotic stress' + ' plants'+ 'PGPR'	Google scholar	Priming fingerprint induced by Bacillus amyloliquefaciens QV15, a common pattern in Arabidopsis thaliana and in field-grown blackberry	Albanchez, et al., 2018	The aim of this study is focused on determining the Bacillus amyloliquefaciens QV15 priming fingerprint in two different plant species, Arabidopsis and blackberry as a crop of agronomic interest, associated with protection upon pathogen challenge. To achieve this goal, Arabidopsis thaliana plants were challenged with Pseudomonas syringae DC3000 under controlled conditions, and field-grown blackbe…	Rejected	Proteomic study
APX' + 'gene express'+ 'abiotic stress' + ' plants'+ 'PGPR'	Google scholar	What Did We Learn From Plant Growth-Promoting Rhizobacteria (PGPR)-Grass Associations Studies Through Proteomic and Metabolomic Approaches?	Alberton et al., 2020	Plant growth stimulation by microorganisms that interact in a mutually beneficial manner remains poorly understood. Understanding the nature of plant-bacteria interactions may open new routes for plant productivity enhancement, especially cereal crops consumed by humans. Proteomic and metabolomic analyses are particularly useful for elucidating these mechanisms. A complete depiction of these mech…	Rejected	Review
APX' + 'gene express'+ 'abiotic stress' + ' plants'+ 'PGPR'	Google scholar	Influence of Azospirillum lectins on the antioxidant system response in wheat seedling roots during abiotic stress	Alen’kin et al., 2022	Azospirillum spp. are plant-growth-promoting rhizobacteria. The surface lectins of A. brasilense strain Sp7 and A. baldaniorum strain Sp245 can attach to specific carbohydrates, and ensure the binding of the bacteria to the root surface. We investigated possible effects of A. brasilense Sp7 and A. baldaniorum Sp245 lectins on the activities of antioxidant enzymes and on the content of low- molecu…	Rejected	No APX
APX' + 'gene express'+ 'abiotic stress' + ' plants'+ 'PGPR'	Google scholar	Saline Soil-based Agriculture by Halotolerant Microorganisms	Alexander et al., 2019		Rejected	Book
APX' + 'gene express'+ 'abiotic stress' + ' plants'+ 'PGPR'	Google scholar	Microorganisms in Saline Environments: Strategies and Functions	Dubey et al., 2019		Rejected	Book
APX' + 'gene express'+ 'abiotic stress' + ' plants'+ 'PGPR'	Google scholar	Agronomic Crops Volume 3: Stress Responses and Tolerance	Emilia et al., 2020		Rejected	Book
APX' + 'gene express'+ 'abiotic stress' + ' plants'+ 'PGPR'	Google scholar	Salt Stress, Microbes, and Plant Interactions: Causes and Solution	Gupta et al., 2019		Rejected	Book
APX' + 'gene express'+ 'abiotic stress' + ' plants'+ 'PGPR'	Google scholar	Current Trends in Microbial Biotechnology for Sustainable Agriculture	Gupta et al., 2020		Rejected	Book
APX' + 'gene express'+ 'abiotic stress' + ' plants'+ 'PGPR'	Google scholar	Biology and Biotechnology of Quinoa	Haldar et al., 2022		Rejected	Book
APX' + 'gene express'+ 'abiotic stress' + ' plants'+ 'PGPR'	Google scholar	Salt Stress, Microbes, and Plant Interactions: Causes and Solution	Khan et al., 2019		Rejected	Book
APX' + 'gene express'+ 'abiotic stress' + ' plants'+ 'PGPR'	Google scholar	Plant Ecophysiology and Adaptation under Climate Change: Mechanisms and Perspectives I General Consequences and Plant Responses	Khanna et al., 2020		Rejected	Book
APX' + 'gene express'+ 'abiotic stress' + ' plants'+ 'PGPR'	Google scholar	Approaches to Plant Stress and their Management	Kumar et al., 2013		Rejected	Book
APX' + 'gene express'+ 'abiotic stress' + ' plants'+ 'PGPR'	Google scholar	Plant growth promoting rhizobacterium Stenotrophomonas maltophilia BJ01 augments endurance against N2 starvation by modulating physiology and biochemical activities of Arachis hypogea	Alexander et al., 2019	Arachis hypogea (Peanut) is one of the most important crops, and it is harvested and used for food and oil production. Being a legume crop, the fixation of atmospheric nitrogen is achieved through symbiotic association. Nitrogen deficiency is one of the major constrains for loss of crop productivity. The bacterium Stenotrophomonas maltophilia is known for inter- actions with plants. In this study…	Rejected	No APX
APX' + 'gene express'+ 'abiotic stress' + ' plants'+ 'PGPR'	Google scholar	Halotolerant PGPR Stenotrophomonas maltophilia BJ01 Induces Salt Tolerance by Modulating Physiology and Biochemical Activities of Arachis hypogaea	Alexander et al., 2020	Arachis hypogaea (Peanut) is one of the most important cash crops grown for food and oil production. Salinity is a major constraint for loss of peanut productivity, and halotolerant plant growth promoting bacteria not only enhance plant-growth but also provide tolerance against salt stress. The potential of halotolerant bacterium Stenotrophomonas maltophilia BJ01 isolated from saline-soil was exp…	Rejected	No APX
APX' + 'gene express'+ 'abiotic stress' + ' plants'+ 'PGPR'	Google scholar	Silymarin-Enriched Biostimulant Foliar Application Minimizes the Toxicity of Cadmium in Maize by Suppressing Oxidative Stress and Elevating Antioxidant Gene Expression	Alharby et al., 2021		Rejected	Duplicate
APX' + 'gene express'+ 'abiotic stress' + ' plants'+ 'PGPR'	Google scholar	Endophytic Fungi Controls the Physicochemical Status of Maize Crop under Salt Stress	Ali et al., 2021	Salt stress is one of the abiotic stresses which negatively affects the growth and yield of different plants world-wide. The purpose of the present investigation was to analyze the physiological and biochemical parameters of maize plants exposed to salt stress with or without fungal association. The results indicated that salinity negatively affected the growth attributes, biochemical parameters …	Rejected	Fungi
APX' + 'gene express'+ 'abiotic stress' + ' plants'+ 'PGPR'	Google scholar	Field Crop Responses and Management Strategies to Mitigate Soil Salinity in Modern Agriculture: A Review	Alkharabsheh et al., 2021	The productivity of cereal crops under salt stress limits sustainable food production and food security. Barley followed by sorghum better adapts to salinity stress, while wheat and maize are moderately adapted. However, rice is a salt-sensitive crop, and its growth and grain yield are significantly impacted by salinity stress. High soil salinity can reduce water uptake, create osmotic stress in …	Rejected	Review
APX' + 'gene express'+ 'abiotic stress' + ' plants'+ 'PGPR'	Google scholar	New insights into cadmium stressful-conditions: Role of ethylene on selenium-mediated antioxidant enzymes	Alves et al., 2019	Cadmium (Cd) contamination has generated an environmental problem worldwide, leading to harmful effects on human health and damages to plant metabolism. Selenium (Se) is non essential for plants, however it can improve plant growth and reduce the adverse effects of abiotic stress. In addition, ethylene may interplay the positive effects of Se in plants. In order to investigate the role of ethylen…	Rejected	No PGPR
APX' + 'gene express'+ 'abiotic stress' + ' plants'+ 'PGPR'	Google scholar	Increased resistance of drought by Trichoderma harzianum fungal treatment correlates with increased secondary metabolites and proline content	Alwhibi et al., 2017	Plant secondary metabolites play vital role in plant stress response. In this study we investigated whether root colonization of tomato (Solanum lycopersicum) infected by Trichoderma harzianum leads to alterations in the biosynthesis of secondary plant metabolites including phytohormones and osmolyte proline under drought stress. Exposure of tomato to drought caused a drastic decline in plant gro…	Rejected	Fungi
APX' + 'gene express'+ 'abiotic stress' + ' plants'+ 'PGPR'	Google scholar	Increased resistance of drought by Trichoderma harzianum fungal treatment correlates with increased secondary metabolites and proline content	Alwhibi et al., 2017	Plant secondary metabolites play vital role in plant stress response. In this study we investigated whether root colonization of tomato (Solanum lycopersicum) infected by Trichoderma harzianum leads to alterations in the biosynthesis of secondary plant metabolites including phytohormones and osmolyte proline under drought stress. Exposure of tomato to drought caused a drastic decline in plant gro…	Rejected	Biotic stress
APX' + 'gene express'+ 'abiotic stress' + ' plants'+ 'PGPR'	Google scholar	Changes in Root Exudates and Root Proteins in Groundnut–Pseudomonas sp. Interaction Contribute to Root Colonization by Bacteria and Defense Response of the Host	Ankati et al., 2014	Selection and application of rhizobacteria, for improved plant health will benefit from a complete understanding of the plant–bacteria interaction. Root exudates (REs) are known to contain signal molecules that facilitate beneficial association of plants with microbes. We have selected a tentatively identified Pseudomonas sp. (RP2), from 126 groundnut (Arachis hypogaea L.)-associated bacterial is…	Rejected	Biotic stress
APX' + 'gene express'+ 'abiotic stress' + ' plants'+ 'PGPR'	Google scholar	Synergistic action of Trichoderma koningiopsis and T. asperellum mitigates salt stress in paddy	Anshu et al., 2022	ntensive cultivation increases the salinity and alkalinity of soil leading to its degradation. Such soil lead to abiotic stress conditions in plants causing ROS-mediated cellular damage. Microbes constitute an important group of bio-stimulants, which are promising alternatives to reduce ROS-mediated abiotic stresses and improve plant growth. In the present study synergistic activity of stress-tol…	Rejected	Fungi
APX' + 'gene express'+ 'abiotic stress' + ' plants'+ 'PGPR'	Google scholar	Elucidating the Response of Crop Plants towards Individual, Combined and Sequentially Occurring Abiotic Stresses	Anwar et al., 2021	In nature, plants are exposed to an ever-changing environment with increasing frequen- cies of multiple abiotic stresses. These abiotic stresses act either in combination or sequentially, thereby driving vegetation dynamics and limiting plant growth and productivity worldwide. Plants’ responses against these combined and sequential stresses clearly differ from that triggered by an indi- vidual st…	Rejected	Review
APX' + 'gene express'+ 'abiotic stress' + ' plants'+ 'PGPR'	Google scholar	Interaction between Piriformospora indica and Azotobacter chroococcum diminish the effect of salt stress in Artemisia annua L. by enhancing enzymatic and non-enzymatic antioxidants	Arora et al., 2020	Artemisia annua is a medicinal plant known for artemisinin, a potential anti-malarial drug. In this study, we investigated how the mutualistic and synergistic interaction between Piriformospora indica (Pi) and Azotobacter chroococcum (Az) ameliorates the damaging effects of salinity on A. annua L. Our findings revealed that dual treated plants had better plant height, dry weights of shoot and roo…	Rejected	Proteomic study
APX' + 'gene express'+ 'abiotic stress' + ' plants'+ 'PGPR'	Google scholar	Mechanisms of Abscisic Acid-Mediated Drought Stress Responses in Plants	Aslam et al., 2021	Drought is one of the major constraints to rain-fed agricultural production, especially under climate change conditions. Plants evolved an array of adaptive strategies that perceive stress stimuli and respond to these stress signals through specific mechanisms. Abscisic acid (ABA) is a premier signal for plants to respond to drought and plays a critical role in plant growth and development. ABA t…	rejected	Review
APX' + 'gene express'+ 'abiotic stress' + ' plants'+ 'PGPR'	Google scholar	Arbuscular Mycorrhizal Fungi, Bacillus cereus, and Candida parapsilosis from a Multicontaminated Soil Alleviate Metal Toxicity in Plants	Azcón et al., 2010	We investigated if the limited development of Trifolium repens growing in a heavy metal (HM) multi- contaminated soil was increased by selected native microorganisms, bacteria (Bacillus cereus (Bc)), yeast (Candida parapsilosis (Cp)), or arbuscular mycorrhizal fungi (AMF), used either as single or dual inoculants. These microbial inoculants were assayed to ascertain whether the selection of HM-to…	Rejected	fungi
APX' + 'gene express'+ 'abiotic stress' + ' plants'+ 'PGPR'	Google scholar	Drought Stress Amelioration in Maize (Zea mays L.) by Inoculation of Bacillus spp. Strains under Sterile Soil Conditions	Azeem et al., 2021	The aim of the present study was to promote plant growth characteristics including mineral uptake and various phytohormone production by indigenously isolated Bacillus spp. strains. Plants subjected to normal and water stress conditions were collected after 21 days to measure physiologi- cal parameters, photosynthetic pigment estimation, biochemical attributes, lipid peroxidation and antioxidant …	Rejected	Proteomic study
APX' + 'gene express'+ 'abiotic stress' + ' plants'+ 'PGPR'	Google scholar	Cadmium stress alters the essential oil composition and the expression of genes involved in their synthesis in peppermint (Mentha piperita L.)	Azimychetabi et al., 2021	Cadmium (Cd) is one of the heavy metals whose presence in soil induces oxidative stress in plants. This inves- tigation was conducted to determine the modifications in some biochemical traits of peppermint (Mentha piperita L.) under cadmium stress. Likewise, the expression of key genes involved in the biosynthesis of menthol and menthofuran, two significant components of peppermint’s essential oi…	Rejected	No PGPR
APX' + 'gene express'+ 'abiotic stress' + ' plants'+ 'PGPR'	Google scholar	The fate of plant growth‐promoting rhizobacteria in soilless agriculture: future perspectives	Azizoglu et al., 2021	The application of plant growth-promoting rhizobacteria (PGPRs) can be an excellent and eco-friendly alternative to the use of chemical fertilizers. While PGPRs are often used in traditional agriculture to facilitate yield increases, their use in soilless agriculture has been limited. Soilless agriculture is growing in popularity among commercial farmers because it eliminates soil-borne problems,…	Rejected	review
APX' + 'gene express'+ 'abiotic stress' + ' plants'+ 'PGPR'	Google scholar	Alleviation of Cadmium and Nickel Toxicity and Phyto-Stimulation of Tomato Plant L. by Endophytic Micrococcus luteus and Enterobacter cloacae	Badawy et al., 2022	Cadmium (Cd) and nickel (Ni) are two of the most toxic metals, wreaking havoc on human health and agricultural output. Furthermore, high levels of Cd and Ni in the soil environment, particularly in the root zone, may slow plant development, resulting in lower plant biomass. On the other hand, endophytic bacteria offer great promise for reducing Cd and Ni. Moreover, they boost plants’ resistance t…	Rejected	Proteomic study
APX' + 'gene express'+ 'abiotic stress' + ' plants'+ 'PGPR'	Google scholar	Hydrogen peroxide-induced salt tolerance in relation to antioxidant systems in pistachio seedlings	Bagheri et al., 2019	In this study, the effects of H2O2 pretreatment on growth and antioxidant system were investigated in pistachio rootstock Badami Rize Zarand during short term salt stress. The plants were subjected to NaCl stress (120 or 240mM) for 7 days after pretreatment with 0, 1, 5 or 10mM H2O2. Salinity stress significantly decreased seedling growth and ascorbic acid (ASA) and carotenoid (CAR) contents, whi…	Rejected	Proteomic study
APX' + 'gene express'+ 'abiotic stress' + ' plants'+ 'PGPR'	Google scholar	Proteomic and ecophysiological responses of soybean (Glycine max L.) root nodules to Pb and hg stress	Baig et al., 2018	Background: Lead (Pb) and mercury (Hg) are persistent hazardous metals in industrially polluted soils which can be toxic in low quantities. Metal toxicity can cause changes at cellular and molecular level which should be studied for better understanding of tolerance mechanism in plants. Soybean (Glycine max L.) is an important oilseed crop of the world including India. Indian soils growing soybea…	Rejected	Proteomic study
APX' + 'gene express'+ 'abiotic stress' + ' plants'+ 'PGPR'	Google scholar	Effect of Chlorpyrifos-Induced Toxicity in Brassica juncea L. by Combination of 24-Epibrassinolide and Plant-Growth- Promoting Rhizobacteria	Bakshi et al., 2021	Pervasive use of chlorpyrifos (CP), an organophosphorus pesticide, has been proven to be fatal for plant growth, especially at higher concentrations. CP poisoning leads to growth inhibi- tion, chlorosis, browning of roots and lipid and protein degradation, along with membrane dys- function and nuclear damage. Plants form a linking bridge between the underground and above- ground communities to es…	Rejected	No APX
APX' + 'gene express'+ 'abiotic stress' + ' plants'+ 'PGPR'	Google scholar	Biologicals and their plant stress tolerance ability	Balkrishna et al., 2022	In a global scenario, the climate is influenced by climatic changes frequently, which often promotes infections and harms agricultural productivity. Plants have their own systems to restore such unusual circumstances, but biomass and yield suffer as a result of this change. This typical condition generally comes under the stress that affects plant growth and development. The stresses are abiotic …	Rejected	review
APX' + 'gene express'+ 'abiotic stress' + ' plants'+ 'PGPR'	Google scholar	Piriformospora indica and Azotobacter chroococcum Consortium Facilitates Higher Acquisition of N, P with Improved Carbon Allocation and Enhanced Plant Growth in Oryza sativa	Bandyopadhyay et al., 2022	The soil microbiome contributes to nutrient acquisition and plant adaptation to numerous biotic and abiotic stresses. Numerous studies have been conducted over the past decade showing that plants take up nutrients better when associated with fungi and additional beneficial bacteria that promote plant growth, but the mechanisms by which the plant host benefits from this tripartite association are …	Rejected	No APX
APX' + 'gene express'+ 'abiotic stress' + ' plants'+ 'PGPR'	Google scholar	Phosphobacteria inoculation enhances the benefit of P–fertilization on Lolium perenne in soils contrasting in P–availability	Barra et al., 2019	Phosphorus (P) is an essential macronutrient for plant growth and is therefore an important component of agricultural fertilizers, especially for P–deficient soils. As a more environmentally friendly alternative to P–fertilization, phosphobacteria are regularly being proposed as bio–inoculants for plants that are cultivated in P–deficient soils. Although it is known that phosphobacteria inoculati…	Rejected	No APX
APX' + 'gene express'+ 'abiotic stress' + ' plants'+ 'PGPR'	Google scholar	Appraisal of emerging crop management opportunities in fruit trees, grapevines and berry crops facilitated by the application of biostimulants	Basile et al., 2020	The fruit crop industry is continuously seeking for new technologies able to improve the overall sustainability of the production systems together with an enhancement of quality and safety of the products. Over the last 10 years, plant biostimulants have emerged as new and promising production tool able to increase the use efficiency of other agronomical inputs (i.e. irrigation water and fertiliz…	Rejected	review
APX' + 'gene express'+ 'abiotic stress' + ' plants'+ 'PGPR'	Google scholar	Brassinosteroids as a multidimensional regulator of plant physiological and molecular responses under various environmental stresses	Basit et al., 2021	Biotic and abiotic stresses, especially heavy metal toxicity, are becoming a big problem in agriculture, which pose serious threats to crop production. Plant hormones have recently been used to develop stress tolerance in a variety of plants. Brassinosteroids (BRs) are the sixth class of plant steroid hormones, with pleiotropic effects on plants. Exogenous application of BRs to boost plant tolera…	Rejected	Review
APX' + 'gene express'+ 'abiotic stress' + ' plants'+ 'PGPR'	Google scholar	Plant growth promoting rhizobacteria alleviates drought stress in potato in response to suppressive oxidative stress and antioxidant enzymes activities	Batool et al., 2020	Maintenance of plant physiological functions under drought stress is normally considered a positive feature as it indicates sustained plant health and growth. This study was conducted to investigate whether plant growth‐promoting rhizobacteria (PGPR) Bacillus subtilis HAS31 has potential to maintain potato growth and yield under drought stress. We analyzed trends of chlorophyll concentration, pho…	Rejected	Proteomic study
APX' + 'gene express'+ 'abiotic stress' + ' plants'+ 'PGPR'	Google scholar	Drought Stress in Brassica napus: Effects, Tolerance Mechanisms, and Management Strategies	Batool et al., 2021	Drought poses serious threats to global crop production and its intensity is continuously soaring due to global warming. Brassica napus L. is an essential oilseed crop with an important place in global edible oil production. Drought-induced yield reduction is a big problem that needs to be addressed by knowing the targeted pathways and processes. Drought stress adversely affects germination, seed…	Rejected	Review
APX' + 'gene express'+ 'abiotic stress' + ' plants'+ 'PGPR'	Google scholar	Co‐inoculation of Arbuscular Mycorrhizal Fungi and the Plant Growth‐Promoting Rhizobacteria Improve Growth and Photosynthesis in Tobacco Under Drought Stress by Up‐Regulating Antioxidant and Mineral Nutrition Metabolism	Begum et al., 2022	Drought stress is a major environmental concern that limits crop growth on a large scale around the world. Significant efforts are required to overcome this issue in order to improve crop production. Therefore, the exciting role of beneficial microor- ganisms under stress conditions needs to be deeply explored. In this study, the role of two biotic entities, i.e., Arbuscular mycorrhizal fungi (AM…	Rejected	Proteomic study
APX' + 'gene express'+ 'abiotic stress' + ' plants'+ 'PGPR'	Google scholar	Potential of Native Arbuscular Mycorrhizal Fungi, Rhizobia, and/or Green Compost as Alfalfa (Medicago sativa) Enhancers under Salinity	Ben-Laouane et al., 2020	Salinity is one of the devastating abiotic stresses that cause reductions in agricultural production. The increased salinization affects alfalfa growth, metabolism, and rhizobium capacity for symbiotic N2 fixation negatively. This study was undertaken to investigate the efficiency of green compost (C; made from green waste), arbuscular mycorrhizal fungi (M; field-sourced native consortium), and/o…	Rejected	Proteomic study
APX' + 'gene express'+ 'abiotic stress' + ' plants'+ 'PGPR'	Google scholar	Impact of Pseudomonas sp. SVB-B33 on Stress- and Cell Wall-Related Genes in Roots and Leaves of Hemp under Salinity	Berni et al., 2022	Salinity is a type of abiotic stress that negatively affects plant growth and development. Textile hemp (Cannabis sativa L.) is an important multi-purpose crop that shows sensitivity to salt stress in a genotype- and developmental stage-dependent manner. The root and shoot biomasses decrease in the presence of NaCl during vegetative growth and several stress-responsive genes are activated. Findin…	Rejected	No APX
APX' + 'gene express'+ 'abiotic stress' + ' plants'+ 'PGPR'	Google scholar	EFFECT OF Bacillus sp AND Glomus monosporum ON GROWTH AND ANTIOXIDANT ACTIVITY OF Lycopersicum esculentum (Tomato) PLANTS UNDER SALINITY STRESS	BHARGAVI RAYAVARAPU et al., 2016	Salinity stress adversely effects the plant growth and crop productivity. The present study examined the effect of co inoculation of Bacillus sp and Glomus monosporum on tomato plant growth parameters, chlorophyll, proline and antioxidant enzymes includes (ascorbate peroxidase, superoxide dismutase, catalase) under salinity stress levels i.e 1.5 ds/m, 7.0ds/m and 12.5 ds/m in tomato plants. The c…	Rejected	Proteomic study
APX' + 'gene express'+ 'abiotic stress' + ' plants'+ 'PGPR'	Google scholar	Mechanistic Insights of the Interaction of Plant Growth-Promoting Rhizobacteria (PGPR) With Plant Roots Toward Enhancing Plant Productivity by Alleviating Salinity Stress.	Bhat et al., 2020	Agriculture plays an important role in a country’s economy. The sector is challenged by many stresses, which led to huge loss in plant productivity worldwide. The ever- increasing population, rapid urbanization with shrinking agricultural lands, dramatic change in climatic conditions, and extensive use of agrochemicals in agricultural practices that caused environmental disturbances confront mank…	Rejected	review
APX' + 'gene express'+ 'abiotic stress' + ' plants'+ 'PGPR'	Google scholar	Understanding Phytomicrobiome: A Potential Reservoir for Better Crop Management	Bhatt et al., 2020	Recent crop production studies have aimed at an increase in the biotic and abiotic tolerance of plant communities, along with increased nutrient availability and crop yields. This can be achieved in various ways, but one of the emerging approaches is to understand the phytomicrobiome structure and associated chemical communications. The phytomicrobiome was characterized with the advent of high-th…	Rejected	review
APX' + 'gene express'+ 'abiotic stress' + ' plants'+ 'PGPR'	Google scholar	Plants under Stress: Involvement of Auxin and Cytokinin	Bielach et al., 2017	Plant growth and development are critically influenced by unpredictable abiotic factors. To survive fluctuating changes in their environments, plants have had to develop robust adaptive mechanisms. The dynamic and complementary actions of the auxin and cytokinin pathways regulate a plethora of developmental processes, and their ability to crosstalk makes them ideal candidates for mediating stress…	Rejected	review
APX' + 'gene express'+ 'abiotic stress' + ' plants'+ 'PGPR'	Google scholar	Comparing the growth-promoting potential of Paenibacillus lentimorbus and Bacillus amyloliquefaciens in Oryza sativa L. var. Sarju-52 under suboptimal nutrient conditions	Bisht et al., 2020	An adequate supply of mineral nutrients is crucial to obtain optimum productivity in agriculture. The present investigation was carried to find the inoculation effect of plant growth-promoting rhizobacteria (PGPR), i.e., Paenibacillus lentimorbus B-30488 (B-30488), Bacillus amyloliquefaciens SN13 (SN13) and their consortium for the growth of rice var. Sarju-52, grown under suboptimal nutrient con…	Rejected	Proteomic study
APX' + 'gene express'+ 'abiotic stress' + ' plants'+ 'PGPR'	Google scholar	A comparison of bacterial variability across biogeographic regions based on PGPR	Biswas et al., 2021	Plants are sessile organisms that experience abiotic stresses like sediment salinity, drought, and extreme temperatures. In light of our growing population and increasing demand for better nutrients and commercial quality foods, optimizing the use of our natural resources is essential to ensuring food security.Enhancing PGPR using modern tools and techniques of biotechnology can greatly contribut…	Rejected	Review
APX' + 'gene express'+ 'abiotic stress' + ' plants'+ 'PGPR'	Google scholar	The Role of Trichoderma Species in Plants Response to Salt Stress	Boamah et al., 2021	Soil salinity is a pending threat to global agricultural sustainability and food security. The natural means of alleviating this stress have become the major concern as to which methods, mechanisms, and organisms to be used. Soil-borne fungi Trichoderma has proven to alleviate salinity stress in plants. This review aimed to shed light on the roles and mechanisms of some species of Trichoderma in …	Rejected	Fungi
APX' + 'gene express'+ 'abiotic stress' + ' plants'+ 'PGPR'	Google scholar	The Impact of Drought Stress on Soil Microbial Community, Enzyme Activities and Plants	Bogati et al., 2022	Nowadays, the most significant consequence of climate change is drought stress. Drought is one of the important, alarming, and hazardous abiotic stresses responsible for the alterations in soil environment affecting soil organisms, including microorganisms and plants. It alters the activity and functional composition of soil microorganisms that are responsible for crucial ecosystem functions and …	Rejected	Review
APX' + 'gene express'+ 'abiotic stress' + ' plants'+ 'PGPR'	Google scholar	Overexpression of SSBXoc , a Single-Stranded DNA-Binding Protein From Xanthomonas oryzae pv. oryzicola, Enhances Plant Growth and Disease and Salt Stress Tolerance in Transgenic Nicotiana benthamiana	Cao et al., 2018	We previously reported that SSBXoc, a highly conserved single-stranded DNA-binding protein from Xanthomonas spp., was secreted through the type III secretion system (T3SS) and functioned as a harpin-like protein to elicit the hypersensitive response (HR) in the non-host plant, tobacco. In this study, we cloned SsbXoc gene from X. oryzae pv. oryzicola (Xoc), the causal agent of bacterial leaf stre…	Rejected	No drought stress
APX' + 'gene express'+ 'abiotic stress' + ' plants'+ 'PGPR'	Google scholar	GENETIC ENGINEERING AND MUTATION BREEDING FOR TOLERANCE TO ABIOTIC AND BIOTIC STRESSES: SCIENCE, TECHNOLOGY AND SAFETY	Cassells et al., 2003	Genetic engineering is often presented as a one-step, rapid solu- tion to the improvement of stress tolerance in plants. While it may benefit from but not necessitate, the requirement for backcrossing for gene introgres- sion, it does not reduce the requirement for field trials. The introduction of herbicide and pest resistance into plants has been an applied success and these characteristic sing…	rejected	Review
APX' + 'gene express'+ 'abiotic stress' + ' plants'+ 'PGPR'	Google scholar	Effects of Compost Amendment on Glycophyte and Halophyte Crops Grown on Saline Soils: Isolation and Characterization of Rhizobacteria with Plant Growth Promoting Features and High Salt Resistance	Castiglione et al., 2021	Soil salinization and desertification due to climate change are the most relevant chal- lenges for the agriculture of the 21st century. Soil compost amendment and plant growth promoting rhizobacteria (PGP-R) are valuable tools to mitigate salinization and desertification impacts on agri- cultural soils. Selection of novel halo/thermo-tolerant bacteria from the rhizosphere of glicophytes and halop…	Rejected	No APX
APX' + 'gene express'+ 'abiotic stress' + ' plants'+ 'PGPR'	Google scholar	2,6-Dichloroisonicotinic acid enhances the expression of defense genes in tomato seedlings against Xanthomonas perforans	Chandrashekar et al., 2014	Plant activation is an appealing disease management tool, avoiding some of the challenges of traditional chemical control by not directly impacting the pathogen. 2,6-dichloroisonicotinic acid (INA) was used as abiotic resistance inducer against bacterial spot disease of tomato caused by Xanthomonas perforans. Ac- tivities of Ascorbate peroxidase (APX) and Catalase (CAT), increased in INA primed t…	Rejected	biotic stress
APX' + 'gene express'+ 'abiotic stress' + ' plants'+ 'PGPR'	Google scholar	Beneficial Soil Bacterium Pseudomonas frederiksbergensis OS261 Augments Salt Tolerance and Promotes Red Pepper Plant Growth	Chatterjee et al., 2017	Soil salinity, being a part of natural ecosystems, is an increasing problem in agricultural soils throughout the world. Pseudomonas frederiksbergensis OS261 has already been proved to be an effective bio-inoculant for enhancing cold stress tolerance in plants, however, its effect on salt stress tolerance is unknown. The main aim of the present study was to elucidate P. frederiksbergensis OS261 me…	Rejected	Proteomic study
APX' + 'gene express'+ 'abiotic stress' + ' plants'+ 'PGPR'	Google scholar	Wheat Microbiome: Structure, Dynamics, and Role in Improving Performance Under Stress Environments	Chen et al., 2022	Wheat is an important cereal crop species consumed globally. The growing global population demands a rapid and sustainable growth of agricultural systems. The development of genetically efficient wheat varieties has solved the global demand for wheat to a greater extent. The use of chemical substances for pathogen control and chemical fertilizers for enhanced agronomic traits also proved advantag…	Rejected	review
APX' + 'gene express'+ 'abiotic stress' + ' plants'+ 'PGPR'	Google scholar	Research Progress on the use of Plant Allelopathy in Agriculture and the Physiological and Ecological Mechanisms of Allelopathy.	Cheng et al., 2015	Allelopathy is a common biological phenomenon by which one organism produces biochemicals that influence the growth, survival, development, and reproduction of other organisms. These biochemicals are known as allelochemicals and have beneficial or detrimental effects on target organisms. Plant allelopathy is one of the modes of interaction between receptor and donor plants and may exert either po…	Rejected	review
APX' + 'gene express'+ 'abiotic stress' + ' plants'+ 'PGPR'	Google scholar	Antioxidant status of medicinal and aromatic plants under the influence of growth-promoting rhizobacteria and osmotic stress	Chiappero et al., 2021	Environmental stress represents a major limitation for increasing crop productivity and the use of natural re- sources. Most plants are exposed to various types of stress to different degrees and have an inherent ability to adapt to seasonal variations, but when they are subjected to drought and salinity stress, a series of morpho- logical, physiological, biochemical and molecular changes occur. …	Rejected	review
APX' + 'gene express'+ 'abiotic stress' + ' plants'+ 'PGPR'	Google scholar	Transcriptome Analysis of Induced Systemic Drought Tolerance Elicited by Pseudomonas chlororaphis O6 in Arabidopsis thaliana	Cho et al., 2013	Root colonization by Pseudomonas chlororaphis O6 induces systemic drought tolerance in Arabidopsis thaliana. Microarray analysis was performed using the 22,800- gene Affymetrix GeneChips to identify differentially- expressed genes from plants colonized with or without P. chlororaphis O6 under drought stressed conditions or normal growth conditions. Root colonization in plants grown under regular …	Accepted
APX' + 'gene express'+ 'abiotic stress' + ' plants'+ 'PGPR'	Google scholar	Bacterial-Mediated Tolerance and Resistance to Plants Under Abiotic and Biotic Stresses	Choudhary et al., 2016	Plant growth-promoting bacteria (PGPB) are capable of alleviating environmental stress and eliciting tolerance in plants to promote their growth. Several PGPB elicit physical and/or chemical changes related to plant defense in the form of induced systemic resistance (ISR) under biotic stress. Researchers emphasized that PGPB- elicited ISR has suppressed plant diseases caused by a range of pathoge…	Rejected	review
APX' + 'gene express'+ 'abiotic stress' + ' plants'+ 'PGPR'	Google scholar	Integrated physiological and molecular approaches to improvement of abiotic stress tolerance in two pulse crops of the semi-arid tropics	Choudhary et al., 2018	Chickpea (Cicer arietinum L.) and pigeonpea [Cajanus cajan L. (Millsp.)] play an important role in mitigating protein malnutrition for millions of poor vegetarians living in regions of the semi-arid tropics. Abiotic stresses such as excess and limited soil moisture (water-logging and drought), heat and chilling (high and low temperature stresses), soil salinity, and acidity are major yield constr…	Rejected	Review
APX' + 'gene express'+ 'abiotic stress' + ' plants'+ 'PGPR'	Google scholar	Potato cytosine methylation and gene expression changes induced by a beneficial bacterial endophyte, Burkholderia phytofirmans strain PsJN	Da et al., 2021	Burkholderia phytofirmans strain PsJN is a highly effective plant-beneficial endophyte. We have used a combination of capillary electrophoresis and methylation-sensitive amplification length polymorphism (CE-MSAP) analysis to investigate the potato genomic DNA cytosine methylation changes that occur in response to PsJN bacterization. Six weeks after PsJN inoculation, over 6800 loci were identifie…	Rejected	No abiotic stress
APX' + 'gene express'+ 'abiotic stress' + ' plants'+ 'PGPR'	Google scholar	Genotype-dependent regulation of drought-responsive genes in tolerant and sensitive sugarcane cultivars	da Silva et al., 2017	Drought is the most damaging among the major abiotic stresses. Transcriptomic studies allow a global overview of expressed genes, providing the basis for molecular markers development. Here, the HT-SuperSAGE technique allowed the evaluation of four drought-tolerant cultivars and four-sensitive cultivars, after 24 h of irrigation suppression. We identified 9831 induced unitags from roots of the to…	Rejected	No PGPR
APX' + 'gene express'+ 'abiotic stress' + ' plants'+ 'PGPR'	Google scholar	Current techniques and prospects for the clonal propagation of hardwoods with emphasis on Eucalyptus	de Assis et al., 2004		Rejected	Chapter book
APX' + 'gene express'+ 'abiotic stress' + ' plants'+ 'PGPR'	Google scholar	Plant Growth-Promoting Rhizobacteria Modulate the Concentration of Bioactive Compounds in Tomato Fruits	de la Osa et al., 2021	Background: The application of microorganisms as bioestimulants in order to increase the yield and/or quality of agricultural products is becoming a widely used practice in many countries. In this work, five plant growth-promoting rhizobacteria (PGPR), isolated from cultivated rice paddy soils, were selected for their plant growth-promoting capacities (e.g., auxin synthesis, chitinase activity, p…	Rejected	No abiotic stress
APX' + 'gene express'+ 'abiotic stress' + ' plants'+ 'PGPR'	Google scholar	Legumes in the reclamation of marginal soils, from cultivar and inoculant selection to transgenic approaches	de la Peña et al., 2012	Mineral nitrogen deficiency is a frequent charac- teristic of arid and semi-arid soils. Biological nitrogen fixation by legumes is a sustainable and environmental- friendly alternative to chemical fertilization. Therefore, legumes have a high potential for the reclamation of marginal soils. Such issue is becoming more urgent due to the ever-rising requirement for food and feed, and the increasing…	Rejected	Review
APX' + 'gene express'+ 'abiotic stress' + ' plants'+ 'PGPR'	Google scholar	Plant biostimulants: innovative tool for enhancing plant nutrition in organic farming	De Pascale et al., 2017	Organic farming has generated significant inter- est among consumers and scientists owing to their healthier and safer characteristics to human health. However, nutrient (N and P) availability has been identified to be a major yield-limiting factor in many organic farming systems. Plant biostimulants which are defined as substances (humic acids, protein hy- drolysates and seaweed extracts) and/or…	rejected	Review
APX' + 'gene express'+ 'abiotic stress' + ' plants'+ 'PGPR'	Google scholar	Jasmonates and Plant Salt Stress: Molecular Players, Physiological Effects, and Improving Tolerance by Using Genome-Associated Tools	Delgado et al., 2021	Soil salinity is one of the most limiting stresses for crop productivity and quality worldwide. In this sense, jasmonates (JAs) have emerged as phytohormones that play essential roles in mediating plant response to abiotic stresses, including salt stress. Here, we reviewed the mechanisms underlying the activation and response of the JA-biosynthesis and JA-signaling pathways under saline condition…	rejected	Review
APX' + 'gene express'+ 'abiotic stress' + ' plants'+ 'PGPR'	Google scholar	Plant growth-promoting rhizobacteria: Potential improvement in antioxidant defense system and suppression of oxidative stress for alleviating salinity stress in Triticum aestivum (L.) plants	Desoky et al., 2020	Plant growth-promoting rhizobacteria (PGPRs) can suppress salt stress effects and improve plant productivity. This study elucidated the mechanisms of growth medium-inoculated PGPRs (Bacillus cereus, Serratia marcescens, and Pseudomonas aeruginosa), which contribute to improving salinity tolerance in Triticum aestivum plants grown under two NaCl-salinity levels (150 and 300 mM). The objective was …	rejected	No APX
APX' + 'gene express'+ 'abiotic stress' + ' plants'+ 'PGPR'	Google scholar	The Foliar Application of Rice Phyllosphere Bacteria induces Drought-Stress Tolerance in Oryza sativa (L.)	Devarajan et al., 2021		Rejected	Duplicate
APX' + 'gene express'+ 'abiotic stress' + ' plants'+ 'PGPR'	Google scholar	Induction of moisture stress tolerance by Bacillus and Paenibacillus in pigeon pea (Cajanus cajan. L)	Devi et al., 2021	Drought stress is the main growth-limiting factor in pigeon pea production. Plant growth-promoting bacteria (PGPB) induce abiotic stress tolerance in several plants. However, the physiological and molecular changes with PGPB priming are not well understood in pigeon pea. The present study explored the potential of Firmibacteria (Bacillus azotoformans MTCC2953, Bacillus aryabhattai KSBN2K7, and Pa…	Rejected	No APX
APX' + 'gene express'+ 'abiotic stress' + ' plants'+ 'PGPR'	Google scholar	Management of Phosphorus in Salinity-Stressed Agriculture for Sustainable Crop Production by Salt-Tolerant Phosphate-Solubilizing Bacteria—A Review	Dey et al., 2021	Among the environmental factors, soil salinity is one of the most detrimental factors affecting plant growth and productivity. Nutritional-imbalance is also known as one of the negative effects of salinity on plant growth and productivity. Among the essential plant nutrients, phosphorus (P) is a nutrient in which the uptake, transport, and distribution in plant is adversely affected by salinity-s…	Rejected	Review
APX' + 'gene express'+ 'abiotic stress' + ' plants'+ 'PGPR'	Google scholar	Transcriptional profiling reveals that a MYB transcription factor MsMYB4 contributes to the salinity stress response of alfalfa	Dong et al., 2018	MYB transcription factors are important regulators of the plant response to abiotic stress. Their participation in the salinity stress of the key forage legume species alfalfa (Medicago sativa) was investigated here by comparing the transcriptomes of the two cultivars Dryland (DL) and Sundory (SD), which differed with respect to their ability to tolerate salinity stress. When challenged by the st…	Rejected	No PGPR
APX' + 'gene express'+ 'abiotic stress' + ' plants'+ 'PGPR'	Google scholar	Paenibacillus polymyxa NSY50 Improves Defense Against Fusarium oxysporum by Increasing Photosynthetic Efficiency, Sucrose Metabolism, and Antioxidant Capacity in Cucumber	Du et al., 2021	To investigate the mechanisms used by plant-growth-promoting rhizobacteria (PGPR) to protect plants under pathogen attack, we studied the effects of Paenibacillus polymyxa NSY50 on promoting the photosynthetic performance, carbon assimilation, and antioxidant metabolism of cucumber seedling leaves under the Fusarium wilt stress. Results showed that the inoculation of Fusarium oxysporum f. sp. cuc…	Rejected	Biotic stress
APX' + 'gene express'+ 'abiotic stress' + ' plants'+ 'PGPR'	Google scholar	Growing more with less: Breeding and developing drought resilient soybean to improve food security	Dubey et al., 2019	Soybean (Glycine max L.) is considered an important crop, and enhancing its production under drought stress and changing climatic conditions to meet the challenges of global food security is crucial. Drought is considered one of the major abiotic factors that adversely affect soybean production. To address this challenge, we need to develop an integrative research approach that will bring togethe…	Rejected	Review
APX' + 'gene express'+ 'abiotic stress' + ' plants'+ 'PGPR'	Google scholar	Proteomic profiling of defense/resistant genes induced during the tripartite interaction of Oryza sativa, Rhizoctonia solani AG1-1A, and Bacillus subtilis against rice sheath blight	Durgadevi et al., 2021	Rice is affected by many diseases, among which sheath blight incited by Rhizoctonia solani causes substantial loss to the crop worldwide. The present investigation aims to assess the efficacy of Bacillus subtilis strain EBPBS4 against rice sheath blight and to delineate the mechanism of resistance through a proteomic approach. Eighty endophytic Bacillus isolates were screened for the antagonistic…	Rejected	Biotic stress
APX' + 'gene express'+ 'abiotic stress' + ' plants'+ 'PGPR'	Google scholar	PGPR strain Paenibacillus polymyxa SQR-21 potentially benefits watermelon growth by re-shaping root protein expression	E et al., 2017		Rejected	Duplicate
APX' + 'gene express'+ 'abiotic stress' + ' plants'+ 'PGPR'	Google scholar	Impact of soil salinity on the plant-growth – promoting and biological control abilities of root associated bacteria	Egamberdieva et al., 2017	The effectiveness of plant growth – promoting bacteria is variable under different biotic and abiotic con- ditions. Abiotic factors may negatively affect the beneficial properties and efficiency of the introduced PGPR inoculants. The aim of this study was to evaluate the effect of plant growth – promoting rhizobac- teria on plant growth and on the control of foot and root rot of tomatoes caused b…	Rejected	Biotic stress
APX' + 'gene express'+ 'abiotic stress' + ' plants'+ 'PGPR'	Google scholar	Overexpression of StDREB2 Transcription Factor Enhances Drought Stress Tolerance in Cotton (Gossypium barbadense L.)	El-Esawi et al., 2019	Drought stress significantly restricts plant growth and crop productivity. Cotton is the most important textile fiber and oilseed crop worldwide, and its cultivation is affected by drought stress, particularly in dry regions. Improving cotton tolerance to drought stress using the advanced genetic engineering technologies is a promising strategy to maintain crop production and fiber quality and me…	Rejected	No PGPR
APX' + 'gene express'+ 'abiotic stress' + ' plants'+ 'PGPR'	Google scholar	Vital roles of sustainable nano-fertilizers in improving plant quality and quantity-an updated review	El-Saadony et al., 2021	Nanotechnology has received much attention because of its distinctive properties and many applications in various fields. Nanotechnology is a new approach to increase agricultural production with premium quality, environmental safety, biological support, and financial stability. Ecofriendly technology is becom- ing progressively important in modern agricultural applications as alternatives to tra…	Rejected	Review
APX' + 'gene express'+ 'abiotic stress' + ' plants'+ 'PGPR'	Google scholar	Transcriptomic analysis reveals the importance of JA-Ile turnover in the response of Arabidopsis plants to plant growth promoting rhizobacteria and salinity	Erice et al., 2017	The use of plant growth promoting rhizobacteria (PGPR) is a proven management strategy to improve plant growth. The aim was to reveal the genomic and proteomic basis of the plant tolerance to saline soil conditions. Combination of whole transcriptome analysis and proteomic profiling helped further the understanding of the complexity of salt tolerance responses. Arabidopsis plants were grown inocu…	Rejected	No APX
APX' + 'gene express'+ 'abiotic stress' + ' plants'+ 'PGPR'	Google scholar	Mining Halophytes for Plant Growth-Promoting Halotolerant Bacteria to Enhance the Salinity Tolerance of Non-halophytic Crops	Etesami et al., 2018	Salinity stress is one of the major abiotic stresses limiting crop production in arid and semi-arid regions. Interest is increasing in the application of PGPRs (plant growth promoting rhizobacteria) to ameliorate stresses such as salinity stress in crop production. The identification of salt-tolerant, or halophilic, PGPRs has the potential to promote saline soil-based agriculture. Halophytes are …	Rejected	Review
APX' + 'gene express'+ 'abiotic stress' + ' plants'+ 'PGPR'	Google scholar	Bacterial mediated alleviation of heavy metal stress and decreased accumulation of metals in plant tissues: Mechanisms and future prospects	Etesami et al., 2018	Heavy metal pollution of agricultural soils is one of main concerns causing some of the different ecological and environmental problems. Excess accumulation of these metals in soil has changed microbial community (e.g., structure, function, and diversity), deteriorated soil, decreased the growth and yield of plant, and entered into the food chain. Plants’ tolerance to heavy metal stress needs to …	Rejected	Review
APX' + 'gene express'+ 'abiotic stress' + ' plants'+ 'PGPR'	Google scholar	Halotolerant plant growth–promoting bacteria: Prospects for alleviating salinity stress in plants	Etesami et al., 2020	As one of the major non–biological stresses, soil salinity negatively affects agricultural productivity, microbial communities, and agricultural economics in impacted areas and is a significant agrarian problem worldwide that has expanded in the last few decades. The use of glycophytes (salt–sensitive plants) is the primary limitation to such an agricultural approach. However, halophytes, which a…	Rejected	Review
APX' + 'gene express'+ 'abiotic stress' + ' plants'+ 'PGPR'	Google scholar	Phytohormones and plant responses to salinity stress: a review	Fahad et al., 2015		Rejected	Review
APX' + 'gene express'+ 'abiotic stress' + ' plants'+ 'PGPR'	Google scholar	Effects, tolerance mechanisms and management of salt stress in grain legumes	Farooq et al., 2017	Salt stress is an ever-present threat to crop yields, especially in countries with irrigated agriculture. Efforts to improve salt tolerance in crop plants are vital for sustainable crop production on marginal lands to ensure future food supplies. Grain legumes are a fascinating group of plants due to their high grain protein contents and ability to fix biological nitrogen. However, the accumulati…	Rejected	Review
APX' + 'gene express'+ 'abiotic stress' + ' plants'+ 'PGPR'	Google scholar	Differential Morphophysiological, Biochemical, and Molecular Responses of Maize Hybrids to Salinity and Alkalinity Stresses	Fatima et al., 2021	Salinity and alkalinity stresses are common in arid and semiarid climates. Both these stresses not only retard crop growth but also cause a severe reduction in yields. The present ex- periment was performed to investigate the morphological, physiological, biochemical, and genetic responses of two maize hybrids (FH-1231 and DK-6714) to salinity and alkalinity stresses. The treat- ments were compri…	Rejected	No PGPR
APX' + 'gene express'+ 'abiotic stress' + ' plants'+ 'PGPR'	Google scholar	Recent advances in physiological and molecular mechanisms of heavy metal accumulation in plants	Feki et al., 2021		Rejected	Duplicate
APX' + 'gene express'+ 'abiotic stress' + ' plants'+ 'PGPR'	Google scholar	The Contrivance of Plant Growth Promoting Microbes to Mitigate Climate Change Impact in Agriculture	Fiodor et al., 2021	Combating the consequences of climate change is extremely important and critical in the context of feeding the world’s population. Crop simulation models have been extensively studied recently to investigate the impact of climate change on agricultural productivity and food security. Drought and salinity are major environmental stresses that cause changes in the physiological, biochemical, and mo…	Rejected	Review
APX' + 'gene express'+ 'abiotic stress' + ' plants'+ 'PGPR'	Google scholar	Mechanisms of plant response to salt and drought stress and their alteration by rhizobacteria	Forni et al., 2017	Soil salinity and drought are an enormous worldwide problem for agriculture, horticulture and sil- viculture. The initial responses of plants to drought and salinity are similar; both are attributed to water deficit which inhibits plant growth and development. Scope In this review, an overview of the major physiological and biochemical changes that occur in plants as a consequence of salt and dro…	Rejected	Review
APX' + 'gene express'+ 'abiotic stress' + ' plants'+ 'PGPR'	Google scholar	Antioxidant activity and induction of mechanisms of resistance to stresses related to the inoculation with Azospirillum brasilense	Fukami et al., 2018	We investigated the effects of Azospirillum brasilense strains Ab-V5 and Ab-V6 in the induction of mechanisms of systemic acquired resistance (SAR) and induced system resistance (ISR) on maize (Zea mays L.) plants. Under normal growth condi- tions, the treatments consisted of the standard inoculation of cells at sowing, and leaf spray of cells or their metabolites at the V2.5 growth stage; under …	Rejected	Proteomic study
APX' + 'gene express'+ 'abiotic stress' + ' plants'+ 'PGPR'	Google scholar	Management of Plant Physiology with Beneficial Bacteria to Improve Leaf Bioactive Profiles and Plant Adaptation under Saline Stress in Olea europea L.	Galicia-Campos et al., 2020	Global climate change has increased warming with a concomitant decrease in water availability and increased soil salinity, factors that compromise agronomic production. On the other hand, new agronomic developments using irrigation systems demand increasing amounts of water to achieve an increase in yields. Therefore, new challenges appear to improve plant fitness and yield, while limiting water …	Rejected	Proteomic study
APX' + 'gene express'+ 'abiotic stress' + ' plants'+ 'PGPR'	Google scholar	Saline and Arid Soils: Impact on Bacteria, Plants, and Their Interaction	Gamalero et al., 2020	Salinity and drought are the most important abiotic stresses hampering crop growth and yield. It has been estimated that arid areas cover between 41% and 45% of the total Earth area worldwide. At the same time, the world’s population is going to soon reach 9 billion and the survival of this huge amount of people is dependent on agricultural products. Plants growing in saline/arid soil shows low g…	Rejected	Review
APX' + 'gene express'+ 'abiotic stress' + ' plants'+ 'PGPR'	Google scholar	Progress and Applications of Plant Growth-Promoting Bacteria in Salt Tolerance of Crops	Gao et al., 2022	Saline soils are a major challenge in agriculture, and salinization is increasing worldwide due to climate change and destructive agricultural practices. Excessive amounts of salt in soils cause imbalances in ion distribution, physiological dehydration, and oxidative stress in plants. Breeding and genetic engineering methods to improve plant salt tolerance and the better use of saline soils are b…	Rejected	Review
APX' + 'gene express'+ 'abiotic stress' + ' plants'+ 'PGPR'	Google scholar	Tomato Bio-Protection Induced by Pseudomonas fluorescens N21.4 Involves ROS Scavenging Enzymes and PRs, without Compromising Plant Growth	García-Villaraco et al., 2021	Aims: to discover the interrelationship between growth, protection and photosynthesis induced by Pseudomonas fluorescens N21.4 in tomato (Lycopersicum sculentum) challenged with the leaf pathogen Xanthomonas campestris, and to define its priming fingerprint. Methods: Photosynthesis was determined by fluorescence; plant protection was evaluated by relative disease incidence, enzyme activities by s…	Rejected	Biotic stress
APX' + 'gene express'+ 'abiotic stress' + ' plants'+ 'PGPR'	Google scholar	Evaluation of the growth, essential oil composition and antioxidant activity of Dracocephalum moldavica under water deficit stress and symbiosis with Claroideoglomus etunicatum and Micrococcus yunnanensis	Ghanbarzadeh et al., 2019	In recent years, the application of certain microorganisms such as Claroideoglomus etunicatum, an arbuscular mycorrhiza fungus (AMF), and Micrococcus yunnanensis, a plant growth promoting bacteria (PGPB), has been considered to be an effective and sustainable strategy for improving crop yield and quality under various en- vironmental conditions. In the present study, a completely randomized facto…	Rejected	Fungi
APX' + 'gene express'+ 'abiotic stress' + ' plants'+ 'PGPR'	Google scholar	Priming plant resistance by activation of redox-sensitive genes	González-Bosch et al., 2018	Priming by natural compounds is an interesting alternative for sustainable agriculture, which also contributes to explore the molecular mechanisms associated with stress tolerance. Although hosts and stress types eventually determine the mode of action of plant-priming agents, it highlights that many of them act on redox signalling. These include vitamins thiamine, riboflavin and quercetin; organ…	Rejected	Review
APX' + 'gene express'+ 'abiotic stress' + ' plants'+ 'PGPR'	Google scholar	Plant growth promoting rhizobia: challenges and opportunities	Gopalakrishnan et al., 2015	Modern agriculture faces challenges, such as loss of soil fertility, fluctuating climatic factors and increasing pathogen and pest attacks. Sustainability and environmental safety of agricultural production relies on eco-friendly approaches like biofertilizers, biopesticides and crop residue return. The multiplicity of beneficial effects of microbial inoculants, particularly plant growth promoter…	Rejected	Review
APX' + 'gene express'+ 'abiotic stress' + ' plants'+ 'PGPR'	Google scholar	Revitalization of plant growth promoting rhizobacteria for sustainable development in agriculture	Gouda et al., 2018	The progression of life in all forms is not only dependent on agricultural and food security but also on the soil characteristics. The dynamic nature of soil is a direct manifestation of soil microbes, bio-mineralization, and synergistic co-evolution with plants. With the increase in world’s population the demand for agriculture yield has increased tremendously and thereby leading to large scale …	Rejected	Review
APX' + 'gene express'+ 'abiotic stress' + ' plants'+ 'PGPR'	Google scholar	Salt stress mitigation in Lathyrus cicera by combining different microbial inocula	Gritli et al., 2022	Arid and semi-arid areas are considered vulnerable to various environmental constraints which are further fortified by climate change. Salinity is one of the most serious abiotic factors affecting crop yield and soil fertility. Till now, no information is available on the effect of salinity on development and symbiotic nitrogen (N2) fixation in the legume species Lathyrus cicera. Here, we evaluat…	Rejected	Proteomic study
APX' + 'gene express'+ 'abiotic stress' + ' plants'+ 'PGPR'	Google scholar	PGPR Mediated Alterations in Root Traits: Way Toward Sustainable Crop Production	Grover et al., 2021	The above ground growth of the plant is highly dependent on the belowground root system. Rhizosphere is the zone of continuous interplay between plant roots and soil microbial communities. Plants, through root exudates, attract rhizosphere microorganisms to colonize the root surface and internal tissues. Many of these microorganisms known as plant growth promoting rhizobacteria (PGPR) improve pla…	Rejected	Review
APX' + 'gene express'+ 'abiotic stress' + ' plants'+ 'PGPR'	Google scholar	An Insight into Abiotic Stress and Influx Tolerance Mechanisms in Plants to Cope in Saline Environments	Gul et al., 2022		Rejected	Duplicate
APX' + 'gene express'+ 'abiotic stress' + ' plants'+ 'PGPR'	Google scholar	Screening of Salt Stress Responsive Genes in Brachypodium distachyon (L.) Beauv. by Transcriptome Analysis	Guo et al., 2020	As one of the most common abiotic stresses, salt stress seriously impairs crop yield. Brachypodium distachyon (L.) Beauv. is a model species for studying wheat and other grasses. In the present investigation, the physiological responses of B. distachyon treated with different concentrations of NaCl for 24 h were measured. Therefore, the control and the seedlings of B. distachyon treated with 200 …	Rejected	No APX
APX' + 'gene express'+ 'abiotic stress' + ' plants'+ 'PGPR'	Google scholar	Low‐temperature stress affects reactive oxygen species, osmotic adjustment substances, and antioxidants in rice (Oryza sativa L.) at the reproductive stage	Guo et al., 2022	The sensitivity of rice to low‐temperature stress (LTS), especially at the reproductive stage, is a primary factor of rice yield fluctuation in cold cultivate region. Here, the changes of reactive oxygen species (ROS), osmotic adjustment substances, and antioxidants in different tissues were analyzed during rice growing under low temperatures (LT) at the reproductive stage. Results showed that LT…	Rejected	No PGPR
APX' + 'gene express'+ 'abiotic stress' + ' plants'+ 'PGPR'	Google scholar	Plant Growth Promoting Rhizobacteria (PGPR): A Sustainable Agriculture to Rescue the Vegetation from the Effect of Biotic Stress: a Review	Gupta et al., 2021	Many biotic agents such as bacteria, viruses, nematodes, arachnids, and weeds encounter the plants. These entities induce biotic stress in their hosts with the aid of disrupting normal metabolism, resulting in limited plant growth and causing plant mortality. As Arbuscular Mycorrhizal Fungi (AMF), plant-associated microbes can regulate physiological and molecular responses to cope with pathogenic…	Rejected	review
APX' + 'gene express'+ 'abiotic stress' + ' plants'+ 'PGPR'	Google scholar	Mechanistic insights of plant-microbe interaction towards drought and salinity stress in plants for enhancing the agriculture productivity	Gupta et al., 2022	The agricultural sector is an important part of the Indian economy. The sector is challenged by various stresses, leading to huge loss in crop productivity globally and disturbs agricultural sustainability. Abiotic stresses (drought and salinity) are among the foremost ecological factors that hinder agricultural productivity globally. Several ecological stresses generate excess amounts of reactiv…	Rejected	Review
APX' + 'gene express'+ 'abiotic stress' + ' plants'+ 'PGPR'	Google scholar	Role of non‐microbial biostimulants in regulation of seed germination and seedling establishment	Gupta et al., 2022	The application of biostimulants from natural origin represents one of the most innovative and promising strategies to pro- mote plant growth and improve crop productivity. The biostimulants have the potential to release dormancy and enhance seed germination of many plant species by altering the physiological processes in seeds even under abiotic stress. The seed application of biostimulants has …	Rejected	Review
APX' + 'gene express'+ 'abiotic stress' + ' plants'+ 'PGPR'	Google scholar	Transgenic Turfgrasses Expressing Hyperactive Ser599Ala Phytochrome A Mutant Exhibit Abiotic Stress Tolerance	Gururani et al., 2016	Turfgrasses are environmentally and recre- ationally valuable plants that are constantly subjected to various forms of stress in their artificial and natural habitats. Previously, it was shown that the transformation of a hyperactive mutant (Serine 599 Alanine, S599A) of oat phytochrome A in zoysia grass (Zoysia japonica) and creeping bentgrass (Agrostis stolonifera L.) resulted in superior quali…	Rejected	No PGPR
APX' + 'gene express'+ 'abiotic stress' + ' plants'+ 'PGPR'	Google scholar	Roles of Plant Growth-Promoting Rhizobacteria (PGPR) in Stimulating Salinity Stress Defense in Plants: A Review	Ha-Tran et al., 2021	To date, soil salinity becomes a huge obstacle for food production worldwide since salt stress is one of the major factors limiting agricultural productivity. It is estimated that a significant loss of crops (20–50%) would be due to drought and salinity. To embark upon this harsh situation, numerous strategies such as plant breeding, plant genetic engineering, and a large variety of agri- cultura…	Rejected	Review
APX' + 'gene express'+ 'abiotic stress' + ' plants'+ 'PGPR'	Google scholar	Antioxidant enzyme responses and metabolite functioning of Pisum sativum L. to sewage sludge in arid and semi-arid environments	Hakeem et al., 2022	The productivity of plants is a direct variant of the countless biotic and abiotic stresses to which a plant is exposed in an environment. This study aimed to investigate the capabilities of leguminous plant garden pea (Pisum sativum L.) to resist water deficit conditions in arid and semi-arid areas when applied with varied doses of sludge for growth response. The effect of sludge doses was evalu…	Rejected	No PGPR
APX' + 'gene express'+ 'abiotic stress' + ' plants'+ 'PGPR'	Google scholar	Bacterial Plant Biostimulants: A Sustainable Way towards Improving Growth, Productivity, and Health of Crops	Hamid et al., 2021		Rejected	Duplicate
APX' + 'gene express'+ 'abiotic stress' + ' plants'+ 'PGPR'	Google scholar	Effect of arbuscular mycorrhizal fungi and phosphorus on drought-induced oxidative stress and 14-3-3 proteins gene expression of Populus cathayana	Han et al., 2022	The application of arbuscular mycorrhizal fungi (AM fungi) and phosphorus (P) can improve plant growth under drought stress by upregulating the antioxidant system and osmotic accumulation. The 14-3-3 protein can respond to different abiotic stresses such as low P and drought. The purpose of this experiment was to study the effects of AM fungi (Rhizophagus intraradices) inoculation on reactive oxy…	Rejected	Fungi
APX' + 'gene express'+ 'abiotic stress' + ' plants'+ 'PGPR'	Google scholar	Benefits to Plant Health and Productivity From Enhancing Plant Microbial Symbionts	Harman et al., 2021	Plants exist in close association with uncountable numbers of microorganisms around, on, and within them. Some of these endophytically colonize plant roots. The colonization of roots by certain symbiotic strains of plant-associated bacteria and fungi results in these plants performing better than plants whose roots are colonized by only the wild populations of microbes. We consider here crop plan…	Rejected	Review
APX' + 'gene express'+ 'abiotic stress' + ' plants'+ 'PGPR'	Google scholar	Melatonin-Induced Protection Against Plant Abiotic Stress: Mechanisms and Prospects	Hassan et al., 2022	Global warming in this century increases incidences of various abiotic stresses restricting plant growth and productivity and posing a severe threat to global food production and security. The plant produces different osmolytes and hormones to combat the harmful effects of these abiotic stresses. Melatonin (MT) is a plant hormone that possesses excellent properties to improve plant performance un…	Rejected	Review
APX' + 'gene express'+ 'abiotic stress' + ' plants'+ 'PGPR'	Google scholar	Prospects for the Study and Improvement of Abiotic Stress Tolerance in Date Palms in the Post-genomics Era	Hazzouri et al., 2020	Date palm (Phoenix dactylifera L.) is a socio-economically important crop in the Middle East and North Africa and a major contributor to food security in arid regions of the world. P. dactylifera is both drought and salt tolerant, but recent water shortages and increases in groundwater and soil salinity have threatened the continued productivity of the crop. Recent studies of date palm have begun…	Rejected	Review
APX' + 'gene express'+ 'abiotic stress' + ' plants'+ 'PGPR'	Google scholar	Two PGPR strains from the rhizosphere of Haloxylon ammodendron promoted growth and enhanced drought tolerance of ryegrass	He et al., 2021	Haloxylon ammodendron, a typical xerophyte, tolerates various abiotic stresses and is widely distributed in desert areas. Two PGPR strains, Bacillus sp. WM13-24 and Pseudomonas sp. M30-35, were previously isolated from the rhizosphere of H. ammodendron in Tengger Desert, Gansu province, northwest China. The aim of this study was to investigate the role of M30-35 and WM13-24 in drought stress alle…	Rejected	No APX
APX' + 'gene express'+ 'abiotic stress' + ' plants'+ 'PGPR'	Google scholar	Plant Growth-Promoting Halobacteria and Their Ability to Protect Crops from Abiotic Stress: An Eco-Friendly Alternative for Saline Soils	Hernández-Canseco et al., 2022	Arid and semi-arid soils display low productivity due to abiotic stress associated with drought and salinity. Halobacteria can increase the yield of crops grown under these types of stress. These bacteria thrive across a wide salinity range (1–25% NaCl) and also in the absence of NaCl and have direct and indirect mechanisms that promote plant growth. This review summarizes studies conducted over …	Rejected	Review
APX' + 'gene express'+ 'abiotic stress' + ' plants'+ 'PGPR'	Google scholar	Quinoa Abiotic Stress Responses: A Review	Hinojosa et al., 2018	Quinoa (Chenopodium quinoa Willd.) is a genetically diverse Andean crop that has earned special attention worldwide due to its nutritional and health benefits and its ability to adapt to contrasting environments, including nutrient-poor and saline soils and drought stressed marginal agroecosystems. Drought and salinity are the abiotic stresses most studied in quinoa; however, studies of other imp…	Rejected	Review
APX' + 'gene express'+ 'abiotic stress' + ' plants'+ 'PGPR'	Google scholar	Efficient rhizobacteria promote growth and alleviate NaCl-induced stress in the plant species Sulla carnosa	Hmaeid et al., 2019	The present work aims to characterize native bacteria from the saline rhizosphere of Sulla carnosa and to identify promising rhizobacteria isolates able to ameliorate the salt tolerance of this species. Bacteria were screened in vitro for salt tolerance capacity and plant growth promoting characteristics (PGP). Selected NaCl-tolerant bac- teria showing a high PGP potential were further characteri…	Rejected	Proteomic study
APX' + 'gene express'+ 'abiotic stress' + ' plants'+ 'PGPR'	Google scholar	Plant root growth, architecture and function	Hodge et al., 2011	Without roots there would be no rhizosphere and no rhizodeposition to fuel microbial activity. Although micro-organisms may view roots merely as a source of carbon supply this belies the fascinating complexity and diversity of root systems that occurs despite their common function. Here, we examine the physiological and genetic determinants of root growth and the complex, yet varied and flexible,…	Rejected	Review
APX' + 'gene express'+ 'abiotic stress' + ' plants'+ 'PGPR'	Google scholar	Melatonin Modulates Plant Tolerance to Heavy Metal Stress: Morphological Responses to Molecular Mechanisms	Hoque et., 2021	Heavy metal toxicity is one of the most devastating abiotic stresses. Heavy metals cause serious damage to plant growth and productivity, which is a major problem for sustainable agri- culture. It adversely affects plant molecular physiology and biochemistry by generating osmotic stress, ionic imbalance, oxidative stress, membrane disorganization, cellular toxicity, and metabolic homeostasis. To …	Rejected	Review
APX' + 'gene express'+ 'abiotic stress' + ' plants'+ 'PGPR'	Google scholar	Consequences and Mitigation Strategies of Abiotic Stresses in Wheat (Triticum aestivum L.) under the Changing Climate	Hossain et al., 2021		Rejected	Duplicate
APX' + 'gene express'+ 'abiotic stress' + ' plants'+ 'PGPR'	Google scholar	Contribution of Exogenous Proline to Abiotic Stresses Tolerance in Plants: A Review	Hosseinifard et al., 2022	Abiotic stresses are the major environmental factors that play a significant role in decreasing plant yield and production potential by influencing physiological, biochemical, and molecular processes. Abiotic stresses and global population growth have prompted scientists to use beneficial strategies to ensure food security. The use of organic compounds to improve tolerance to abiotic stresses has…	Rejected	Review
APX' + 'gene express'+ 'abiotic stress' + ' plants'+ 'PGPR'	Google scholar	Transcription Factors Interact with ABA through Gene Expression and Signaling Pathways to Mitigate Drought and Salinity Stress	Hussain et al., 2021		Rejected	Duplicate
APX' + 'gene express'+ 'abiotic stress' + ' plants'+ 'PGPR'	Google scholar	Exogenous Melatonin mediates the regulation of endogenous nitric oxide in Glycine max L. to reduce effects of drought stress	Imran et al., 2021	Drought stress retards plant growth and yield. Melatonin and nitric oxide (NO) have demonstrated their potential role against abiotic stresses; however, the underlying molecular mechanism by which they interact and extend drought stress tolerance has not been fully elucidated. Herein, the current study was performed to establish the optimum beneficial concentration of MT and NO in combating droug…	rejected	No PGPR
APX' + 'gene express'+ 'abiotic stress' + ' plants'+ 'PGPR'	Google scholar	Addressing the challenge of cold stress resilience with the synergistic effect of Rhizobium inoculation and exogenous melatonin application in Medicago truncatula	Irshad et al., 2021	Cold stress is an adverse environmental condition that limits the growth and yield of leguminous plants. Thus, discovering an effective way of ameliorating cold-mediated damage is important for sustainable legume pro- duction. In this study, the combined use of Rhizobium inoculation (RI) and melatonin (MT) pretreatment was investigated in Medicago truncatula plants under cold stress. Eight-week-o…	Rejected	Proteomic study
APX' + 'gene express'+ 'abiotic stress' + ' plants'+ 'PGPR'	Google scholar	Copper-resistant bacteria reduces oxidative stress and uptake of copper in lentil plants: potential for bacterial bioremediation	Islam et al., 2016	For effective microbe-assisted bioremediation, metal-resistant plant growth-promoting bacteria (PGPB) must facilitate plant growth by restricting excess metal uptake in plants, leading to prevent its bio-amplification in the ecosys- tem. The aims of our study were to isolate and characterize copper (Cu)-resistant PGPB from waste water receiving con- taminated soil. In addition, we investigated th…	Rejected	Proteomic study
APX' + 'gene express'+ 'abiotic stress' + ' plants'+ 'PGPR'	Google scholar	The Combined Effects of Rhizobacteria and Methyl Jasmonate on Rosmarinic Acid Production and Gene Expression Profile in Origanum Vulgare l. Under Salinity Conditions	Jafari et al., 2021		Rejected	Duplicate
APX' + 'gene express'+ 'abiotic stress' + ' plants'+ 'PGPR'	Google scholar	Metal Resistant Endophytic Bacteria Reduces Cadmium, Nickel Toxicity, and Enhances Expression of Metal Stress Related Genes with Improved Growth of Oryza Sativa, via Regulating Its Antioxidant Machinery and Endogenous Hormones	Jan et al., 2019	The tolerance of plant growth-promoting endophytes (PGPEs) against various concentrations of cadmium (Cd) and nickel (Ni) was investigated. Two glutathione-producing bacterial strains (Enterobacter ludwigii SAK5 and Exiguobacterium indicum SA22) were screened for Cd and Ni accumulation and tolerance in contaminated media, which showed resistance up to 1.0 mM. Both strains were further evaluated b…	Rejected	No APX
APX' + 'gene express'+ 'abiotic stress' + ' plants'+ 'PGPR'	Google scholar	Plant growth regulators: a sustainable approach to combat pesticide toxicity	Jan et al., 2020	Pesticides are chemical substances intended for preventing or controlling pests. These are toxic substances which contaminate soil, water bodies and vegetative crops. Excessive use of pesticides may cause destruction of biodiversity. In plants, pesti- cides lead to oxidative stress, inhibition of physiological and biochemical pathways, induce toxicity, impede photosynthesis and negatively affect …	Rejected	review
APX' + 'gene express'+ 'abiotic stress' + ' plants'+ 'PGPR'	Google scholar	Genome-wide profiling reveals extensive alterations in Pseudomonas putida- mediated miRNAs expression during drought stress in chickpea (Cicer arietinum L.)	Jatan et al., 2019	Pseudomonas putida strain MTCC5279 (RA) is a plant growth promoting rhizobacteria which improves growth and development of plants by colonizing their root surface and also confers drought stress tolerance. Further, along with several stress responsive genes, microRNAs are also well known for their crucial involvement in drought stress response. Considering the above, in this study, we performed i…	Rejected	No APX
APX' + 'gene express'+ 'abiotic stress' + ' plants'+ 'PGPR'	Google scholar	Reactive oxygen species (ROS) and antioxidative enzyme status in Solanum lycopersicum on priming with fluorescent Pseudomonas spp. against Fusarium oxysporum	Jayamohan et al., 2018	In plants, ROS signaling and increase in activities of antioxidants are among defense responses. The present study describes the oxidative stress profiling in model host plant tomato (Solanum lycopersicum L.), during an invasion of the wilt pathogen Fusarium oxysporum f. sp. lycopersici with or without seed priming with Pseudomonas isolates M80, M96 and T109. Tomato seeds were primed with known P…	Rejected	biotic stress
APX' + 'gene express'+ 'abiotic stress' + ' plants'+ 'PGPR'	Google scholar	Combination of endophytic and rhizospheric plant growth promoting rhizobacteria in Oryza sativa shows higher accumulation of osmoprotectant against saline stress	Jha et al., 2011	The effect of endophytic and rhizospheric bacteria was studied on salt stress in a local paddy rice (Oryza sativa L.) variety GJ-17. Plants inoculated with endophytic bacterium Pseudomonas pseudoalcaligenes showed significantly higher concentration of glycine beta- ine-like quaternary compounds and higher shoot biomass at lower salinity levels. While at higher salinity levels, mix- ture of both P…	Rejected	No APX
APX' + 'gene express'+ 'abiotic stress' + ' plants'+ 'PGPR'	Google scholar	Gibberellin-producing Serratia nematodiphila PEJ1011 ameliorates low temperature stress in Capsicum annuum L.	Kang et al., 2015	We studied the effects of plant growth-promoting rhizobacteria (PGPR) on the physio-hormonal attri- butes of pepper (Capsicum annuum L.) plants grown under low-temperature stress. After initial screening for growth promoting effect on gibberellin (GA) mutant Waito-C rice seeds, the PGPRs were analysed for gibberellins (GA) production through advanced chromatographic and spectroscopic techniques. …	Rejected	No APX
APX' + 'gene express'+ 'abiotic stress' + ' plants'+ 'PGPR'	Google scholar	ACC deaminase containing diazotrophic endophytic bacteria ameliorate salt stress in Catharanthus roseus through reduced ethylene levels and induction of antioxidative defense systems	Karthikeyan et al., 2012	Among a total of 27 cultivable salt tolerant endophytic bacteria isolated from Catharanthus roseus grown in highly salt affected coastal region of cuddalore district, Tamilnadu, India four isolates were found to be positive for nitrogenase activity. The isolates were evaluated for their stress tolerance efficiency and screened for different PGP traits. Based on the above studied parameters, and a…	Rejected	Proteomic study
APX' + 'gene express'+ 'abiotic stress' + ' plants'+ 'PGPR'	Google scholar	Molecular responses to drought stress in plants	KAUR et al., 2017	Drought is a severe environmental constraint to plant productivity. Being a multidimensional stress, it triggers a wide variety of plant responses ranging from physiological, biochemical to molecular levels. One of the inevitable consequences of drought stress is an increase in reactive oxygen species (ROS) production in different cellular compartments, namely the chloroplasts and mitochondria. T…	Rejected	review
APX' + 'gene express'+ 'abiotic stress' + ' plants'+ 'PGPR'	Google scholar	Biocontrol Potential of Bacillus amyloliquefaciens against Botrytis pelargonii and Alternaria alternata on Capsicum annuum	Kazerooni et al., 2011	The aim of this study was to assess the ability of Bacillus amyloliquefaciens, to augment plant growth and suppress gray mold and leaf spot in pepper plants. Morphological modifications in fungal pathogen hyphae that expanded toward the PGPR colonies were detected via scanning electron microscope. Furthermore, preliminary screening showed that PGPR could produce various hydrolytic enzymes in its …	Rejected	biotic stress
APX' + 'gene express'+ 'abiotic stress' + ' plants'+ 'PGPR'	Google scholar	Ampelopsin Confers Endurance and Rehabilitation Mechanisms in Glycine max cv. Sowonkong under Multiple Abiotic Stresses	Kazerooni et al., 2021	The present investigation aims to perceive the effect of exogenous ampelopsin treatment on salinity and heavy metal damaged soybean seedlings (Glycine max L.) in terms of physiochemical and molecular responses. Screening of numerous ampelopsin concentrations (0, 0.1, 1, 5, 10 and 25 μM) on soybean seedling growth indicated that the 1 μM concentration displayed an increase in agronomic traits. The…	Rejected	No PGPR
APX' + 'gene express'+ 'abiotic stress' + ' plants'+ 'PGPR'	Google scholar	Molecular priming as an approach to induce tolerance against abiotic and oxidative stresses in crop plants	Kerchev et al., 2020	Abiotic stresses, including drought, salinity, extreme temperature, and pollutants, are the main cause of crop losses worldwide. Novel climate-adapted crops and stress tolerance-enhancing compounds are increasingly needed to counteract the negative effects of unfavorable stressful environments. A number of natural products and synthetic chemicals can protect model and crop plants against abiotic …	Rejected	Review
APX' + 'gene express'+ 'abiotic stress' + ' plants'+ 'PGPR'	Google scholar	Molecular priming as an approach to induce tolerance against abiotic and oxidative stresses in crop plants	Kerchev et al., 2020		Rejected	Duplicate
APX' + 'gene express'+ 'abiotic stress' + ' plants'+ 'PGPR'	Google scholar	Molecular mechanism underlying Piriformospora indica-mediated plant improvement/protection for sustainable agriculture	Khalid et al., 2019	The beneficial endophytic microorganisms have received significant attention in agriculture because of their exceptional capabilities to facilitate functions like nutrient enrichment, water sta- tus, and stress tolerance (biotic and abiotic). This review signifies the molecular mechanisms to better understand the Piriformospora indica-mediated plants improvement or protection for sus- tainable ag…	Rejected	Review
APX' + 'gene express'+ 'abiotic stress' + ' plants'+ 'PGPR'	Google scholar	The stimulatory effects of plant growth promoting rhizobacteria and plant growth regulators on wheat physiology grown in sandy soil	Khan et al., 2019		Rejected	Duplicate
APX' + 'gene express'+ 'abiotic stress' + ' plants'+ 'PGPR'	Google scholar	Fungicide-Tolerant Plant Growth-Promoting Rhizobacteria Mitigate Physiological Disruption of White Radish Caused by Fungicides Used in the Field Cultivation	Khan et al., 2020	Excessive use of fungicides in agriculture may result in substantial accumulation of active residues in soil, which affect crop health and yield. We investigated the response of Raphanus sativus (white radish) to fungicides in soil and potential beneficial interactions of radish plants with fungicide-tolerant plant growth-promoting rhizobacteria (PGPR). The PGPR were isolated from cabbage and mus…	Rejected	biotic stress
APX' + 'gene express'+ 'abiotic stress' + ' plants'+ 'PGPR'	Google scholar	Thermotolerance effect of plant growth- promoting Bacillus cereus SA1 on soybean during heat stress	Khan et al., 2020	Incidences of heat stress due to the changing global climate can negatively affect the growth and yield of temperature-sensitive crops such as soybean variety, Pungsannamul. Increased temperatures decrease crop productivity by affecting biochemical, physiological, molecular, and morphological factors either individually or in combination with other abiotic stresses. The application of plant growt…	Rejected	Proteomic study
APX' + 'gene express'+ 'abiotic stress' + ' plants'+ 'PGPR'	Google scholar	Involvement of nitric oxide (NO) in plant responses to metalloids	Kolbert et al., 2021	Plants respond to the limited or excess supply of metalloids, boron (B), silicon (Si), selenium (Se), arsenic (As), and antimony (Sb) via complex signaling pathways that are mainly regulated by nitric oxide (NO). The ab- sorption of metalloids from the soil is facilitated by pathways that involve aquaporins, aquaglyceroporins, phosphate, and sulfate transporters; however, their regulation by NO i…	Rejected	review
APX' + 'gene express'+ 'abiotic stress' + ' plants'+ 'PGPR'	Google scholar	Effects of 1-aminocyclopropane-1-carboxylate (ACC) deaminase-overproducing Sinorhizobium meliloti on plant growth and copper tolerance of Medicago lupulina	Kong et al., 2015	Background and aims Rhizobia typically produce a lower level of ACC deaminase compared with free- living plant growth-promoting bacteria. While the endogenous rhizobial ACC deaminase is important in legume nodulation, it is not sufficient to protect host plants against environmental stresses. The main goal of this study was to assess the effects of a genetically engineered Sinorhizobium meliloti …	Rejected	No drought stress
APX' + 'gene express'+ 'abiotic stress' + ' plants'+ 'PGPR'	Google scholar	Exogenous phytohormones in the regulation of growth and development of cereals under abiotic stresses	Kosakivska et al., 2022	Abiotic stresses, among which extreme temperatures, salinity, drought, UV radiation, heavy metal pollution, etc., adversely affect the growth and yield of cereals, the most important group of monocotyledonous plants that have met the nutritional and other needs of mankind for thousands of years. To cope with stress, plants deploy certain adaptive strategies that com- bine morphological, physiolog…	Rejected	review
APX' + 'gene express'+ 'abiotic stress' + ' plants'+ 'PGPR'	Google scholar	Hydrogen sulfide and phytohormones crosstalk in plant defense against abiotic stress	Kour et al., 2015		Rejected	Chapter book
APX' + 'gene express'+ 'abiotic stress' + ' plants'+ 'PGPR'	Google scholar	Salt Stress Tolerance-Promoting Proteins and Metabolites under Plant-Bacteria-Salt Stress Tripartite Interactions	Krishnamoorthy et al., 2022	The rapid increase in soil salinization has impacted agricultural output and poses a threat to food security. There is an urgent need to focus on improving soil fertility and agricultural yield, both of which are severely influenced by abiotic variables such as soil salinity and sodicity. Abiotic forces have rendered one-third of the overall land unproductive. Microbes are the primary answer to t…	Rejected	Review
APX' + 'gene express'+ 'abiotic stress' + ' plants'+ 'PGPR'	Google scholar	Effect of Salt Stress on Medicinal Plants and its Amelioration by Plant Growth Promoting Microbes	Kumar et al., 2017	Salt stress is widely recognized as one of the important abiotic stressors results the severe reduction of medicinal plants growth and its herb yield. It also critically reduces the production of medicinally important active chemical content in the plants. There are three main stages on the growth of medicinal plants where the high salinity stress severely affects the plant growth. Recent studies…	Rejected	Review
APX' + 'gene express'+ 'abiotic stress' + ' plants'+ 'PGPR'	Google scholar	Effect of abiotic stresses and mitigation strategy associated with their tolerance in wheat	Kumar et al., 2021	Global warming influences environmental factors which directly and indirectly affects agricultural crop production by exposing to several new biotic and abiotic stresses. The abiotic stresses like heat, drought, moisture, salinity and pre harvest sprouting stresses are most common whose effect became more severe due to climate change. Globally wheat is the most widely cultivated and used crops du…	Rejected	Review
APX' + 'gene express'+ 'abiotic stress' + ' plants'+ 'PGPR'	Google scholar	Biofertilizers: An ecofriendly technology for nutrient recycling and environmental sustainability	Kumar et al., 2022	Modern intensive agricultural practices face numerous challenges that pose major threats to global food security. In order to address the nutritional requirements of the ever-increasing world population, chemical fertilizers and pesticides are applied on large scale to increase crop production. However, the injudicious use of agrochemicals has resulted in environmental pollution leading to public…	rejected	Review
APX' + 'gene express'+ 'abiotic stress' + ' plants'+ 'PGPR'	Google scholar	Plant Nutrition: An Effective Way to Alleviate Abiotic Stress in Agricultural Crops	Kumari et al., 2022	By the year 2050, the world’s population is predicted to have grown to around 9–10 billion people. The food demand in many countries continues to increase with population growth. Various abiotic stresses such as temperature, soil salinity and moisture all have an impact on plant growth and development at all levels of plant growth, including the overall plant, tissue cell, and even sub-cellular l…	rejected	Review
APX' + 'gene express'+ 'abiotic stress' + ' plants'+ 'PGPR'	Google scholar	“Potential of organic amendments (AM fungi, PGPR, vermicompost and seaweeds) in combating salt stress – A review”	Kumari et al., 2022	Climate change and agricultural practices such as the overuse of chemical fertilizers and pesticides have exac- erbated the impact of abiotic pressures on crop productivity and degraded the ecosystem. Salinity is one of the major abiotic stress which affects agricultural yield. The increased salt concentration results in deteriorated soil aeration, soil compaction and affects various biochemical …	rejected	Review
APX' + 'gene express'+ 'abiotic stress' + ' plants'+ 'PGPR'	Google scholar	Interaction between Grasses and Epichloë Endophytes and Its Significance to Biotic and Abiotic Stress Tolerance and the Rhizosphere	Lee et al., 2021		rejected	Duplicate
APX' + 'gene express'+ 'abiotic stress' + ' plants'+ 'PGPR'	Google scholar	Inoculation with Plant Growth-Promoting Bacteria (PGPB) Improves Salt Tolerance of Maize Seedling	Li et al., 2017	Our objective was to evaluate the role of plant growth-promoting bacteria to protect maize (Zea mays L.) plants against salt damage. Bacillus aquimaris DY-3 based on their 16S rDNA sequences, the most tolerant to salinity and the synthesis of indole acetic acid was selected for further studies. Strain was inocu- lated on maize roots growing in sterilized sand under salt stress conditions (1% NaCl…	Rejected	Proteomic study
APX' + 'gene express'+ 'abiotic stress' + ' plants'+ 'PGPR'	Google scholar	Do volatile compounds produced by Fusarium oxysporum and Verticillium dahliae affect stress tolerance in plants?	Li et al., 2018	Volatile compounds (VCs) produced by diverse microbes seem to affect plant growth, development and/or stress tolerance. We investigated how VCs released by soilborne fungi Fusarium oxysporum and Verticillium dahliae affect Arabidopsis thaliana responses to abiotic and biotic stresses. Under salt stress, VCs from both fungi helped its growth and increased chlorophyll content. However, in contrast …	Rejected	Biotic stress
APX' + 'gene express'+ 'abiotic stress' + ' plants'+ 'PGPR'	Google scholar	Overexpression of LcSABP, an Orthologous Gene for Salicylic Acid Binding Protein 2, Enhances Drought Stress Tolerance in Transgenic Tobacco	Li et al., 2019	Salicylic acid (SA) plays an essential role in the growth and development of plants, and in their response to abiotic stress. Previous studies have mostly focused on the effects of exogenously applied SA on the physiological response of plants to abiotic stresses; however, the underlying genetic mechanisms for the regulatory functions of endogenous SA in the defense response of plants remain uncl…	Rejected	No PGPR
APX' + 'gene express'+ 'abiotic stress' + ' plants'+ 'PGPR'	Google scholar	Physiological changes and transcriptome profiling in Saccharum spontaneum L. leaf under water stress and re‐watering conditions	Li et al., 2021	As the polyploidy progenitor of modern sugarcane, Saccharum spontaneum is considered to be a valuable resistance source to various biotic and abiotic stresses. However, little has been reported on the mechanism of drought tolerance in S. spontaneum. Herein, the physiological changes of S. spontaneum GXS87‐16 at three water‐deficit levels (mild, moderate, and severe) and after re‐watering during t…	Rejected	No PGPR
APX' + 'gene express'+ 'abiotic stress' + ' plants'+ 'PGPR'	Google scholar	Foliar-applied cerium oxide nanomaterials improve maize yield under salinity stress: Reactive oxygen species homeostasis and rhizobacteria regulation	Liu et al., 2022	Salinity stress seriously threatens agricultural productivity and food security worldwide. This work reports on the mechanisms of alleviating salinity stress by cerium oxide nanomaterials (CeO2 NMs) in maize (Zea may L.). Soil- grown maize plants were irrigated with deionized water or 100 mM NaCl solution as the control or the salinity stress treatment. CeO2 NMs (1, 5, 10, 20, and 50 mg/L) with a…	Rejected	Proteomic study
APX' + 'gene express'+ 'abiotic stress' + ' plants'+ 'PGPR'	Google scholar	Molecular control to salt tolerance mechanisms of woody plants: recent achievements and perspectives	Llanes et al., 2021	Key message Woody plants have salt-tolerant mechanisms similar to those developed by non-woody plants. Among others, compartmentalization of ions, production of compatible solutes, synthesis of specific proteins and metabo- lites, and induction of transcriptional factors are the most relevant. Woody plant-associated microbial interactions as well as naturally stress-adapted trees are resources th…	Rejected	review
APX' + 'gene express'+ 'abiotic stress' + ' plants'+ 'PGPR'	Google scholar	Epsc Involved in the Encoding of Exopolysaccharides Produced by Bacillus amyloliquefaciens FZB42 Act to Boost the Drought Tolerance of Arabidopsis thaliana	Lu et al., 2018	Bacillus amyloliquefaciens FZB42 is a plant growth-promoting rhizobacteria that stimulates plant growth, and enhances resistance to pathogens and tolerance of salt stress. Instead, the mechanistic basis of drought tolerance in Arabidopsis thaliana induced by FZB42 remains unexplored. Here, we constructed an exopolysaccharide-deficient mutant epsC and determined the role of epsC in FZB42-induced d…	Rejected	No APX
APX' + 'gene express'+ 'abiotic stress' + ' plants'+ 'PGPR'	Google scholar	Overexpression of Cotton a DTX/MATE Gene Enhances Drought, Salt, and Cold Stress Tolerance in Transgenic Arabidopsis	Lu et al., 2019	Abiotic stresses have negative effects on plants growth and development. Plants, being sessile, have developed specific adaptive strategies that allow them to rapidly detect and respond to abiotic stress factors. The detoxification efflux carriers (DTX)/multidrug and toxic compound extrusion (MATE) transporters are of significance in the translocation of abscisic acid (ABA), a phytohormone with p…	Rejected	No PGPR
APX' + 'gene express'+ 'abiotic stress' + ' plants'+ 'PGPR'	Google scholar	Bacillus amyloliquefaciens as an excellent agent for biofertilizer and biocontrol in agriculture: An overview for its mechanisms	Luo et al., 2022	Bacillus amyloliquefaciens (BA) is one of the most promising bacteria for plant growth promotion (PGP) without harmful side effects. As an excellent agent for biofertilizer and biocontrol in agriculture, the PGP mechanisms of BA have been studied extensively. However, these studies have been rarely summarized, although it could hinder a better understanding of BA strains’ potential mechanisms and…	Rejected	Review
APX' + 'gene express'+ 'abiotic stress' + ' plants'+ 'PGPR'	Google scholar	Microbial signaling and plant growth promotion	Mabood et al., 2014	he rhizosphere offers a complex microhabitat where root exudates provide a diverse mixture of organic compounds that are used as nutrients or signals by the soil microbial population. On the other hand, these soil microorganisms produce compounds that directly or indirectly assist in plant growth promotion. The widely recognized mechanisms of plant growth promotion are biofertilization, productio…	Rejected	Review
APX' + 'gene express'+ 'abiotic stress' + ' plants'+ 'PGPR'	Google scholar	Modulators or facilitators? Roles of lipids in plant root–microbe interactions	Macabuhay et al., 2022	Lipids have diverse functions in regulating the plasma membrane’s cellular pro- cesses and signaling mediation. Plasma membrane lipids are also involved in the plant’s complex interactions with the surrounding microorganisms, with which plants are in various forms of symbiosis. The roles of lipids influence the whole microbial colonization process, thus shaping the rhizomicrobiome. As chemical si…	Rejected	Review
APX' + 'gene express'+ 'abiotic stress' + ' plants'+ 'PGPR'	Google scholar	The arbuscular mycorrhizal symbiosis attenuates symptom severity and reduces virus concentration in tomato infected by Tomato yellow leaf curl Sardinia virus (TYLCSV)	Maffei et al., 2014	The arbuscular mycorrhizal (AM) symbiosis is considered a natural instrument to improve plant health and productivity since mycorrhizal plants often show higher tol- erance to abiotic and biotic stresses. However, the impact of the AM symbiosis on infection by viral pathogens is still largely uncertain and little explored. In the present study, tomato plants were grown under controlled conditions…	Rejected	Fungi
APX' + 'gene express'+ 'abiotic stress' + ' plants'+ 'PGPR'	Google scholar	Antioxidants in Plant-Microbe Interaction	Mahapatra 2021		rejected	Book
APX' + 'gene express'+ 'abiotic stress' + ' plants'+ 'PGPR'	Google scholar	Synergistic Practicing of Rhizobacteria and Silicon Improve Salt Tolerance: Implications from Boosted Oxidative Metabolism, Nutrient Uptake, Growth and Grain Yield in Mung Bean	Mahmood et al., 2022	Plant growth promoting rhizobacteria (PGPR) and silicon (Si) are known for alleviating abiotic stresses in crop plants. In this study, Bacillus drentensis and Enterobacter cloacae strains of PGPR and foliar application of Si were tested for regulating the antioxidant metabolism and nutrient uptake on grain yield of mung bean under irrigation of saline water (3.12 and 7.81 dS m−1). Bacterial inocu…	rejected	Proteomic study
APX' + 'gene express'+ 'abiotic stress' + ' plants'+ 'PGPR'	Google scholar	The response of salt-stressed Valencia sweet orange (Citrus sinensis) to salicylic acid and methyl jasmonate treatments	Mahmoud et al., 2021	Salinity is an obstacle to citriculture worldwide, and is a concern in arid, semiarid, and coastal regions. In the current study, we irrigated one-year-old ‘Valencia’ trees budded onto Kuharske rootstock with 60 mM sodium chloride (NaCl) solution for ten weeks. Subsequently, these trees were sprayed with 50, 75, and 100 mM SA or MeJA to determine whether these phytohormones could alleviate the de…	rejected	No abiotic stress
APX' + 'gene express'+ 'abiotic stress' + ' plants'+ 'PGPR'	Google scholar	Genetic Resources of Chili Pepper (Capsicum annuum L.) against Phytophthora capsici and Their Induction through Various Biotic and Abiotic Factors	Majid et al., 2017	Phytophthora capsici is the most destructive pathogen of vegetables that has blown a serious threat to chili pepper plants. We discussed the control of Phytophthora capsici through manipulation of genetic architecture of chili plant. Various genes encoding transcriptional regulatory and defense related putative pro- teins such as pathogen-related protein (PR), Anti-Microbial peptides (AMPs), Poly…	Rejected	No PGPR
APX' + 'gene express'+ 'abiotic stress' + ' plants'+ 'PGPR'	Google scholar	Redox Regulation in Diazotrophic Bacteria in Interaction with Plants	Mandon et al., 2021	Plants interact with a large number of microorganisms that greatly influence their growth and health. Among the beneficial microorganisms, rhizosphere bacteria known as Plant Growth Promoting Bacteria increase plant fitness by producing compounds such as phytohormones or by car- rying out symbioses that enhance nutrient acquisition. Nitrogen-fixing bacteria, either as endophytes or as endosymbion…	Rejected	Review
APX' + 'gene express'+ 'abiotic stress' + ' plants'+ 'PGPR'	Google scholar	Molecular Insights into the Role of Reactive Oxygen, Nitrogenand Sulphur Species in Conferring Salinity Stress Tolerance in Plants	Mangal et al., 2022	Salinity stress is the major abiotic stress that affects crop production and productivity as it has a multifarious negative effect on the growth and development of the plant. Salinity stress stimulates the accumulation of reactive oxygen species (ROS) which is toxic to cells at higher concentrations. At lower concentrations, these molecules help in the mitigation of salinity stress through a seri…	Rejected	Review
APX' + 'gene express'+ 'abiotic stress' + ' plants'+ 'PGPR'	Google scholar	Priming of Plant Defenses against Ophiostoma novo-ulmi by Elm (Ulmus minor Mill.) Fungal Endophytes	Martínez-Arias et al., 2011	Some fungal endophytes of forest trees are recognized as beneficial symbionts against stresses. In previous works, two elm endophytes from the classes Cystobasidiomycetes and Eu- rotiomycetes promoted host resistance to abiotic stress, and another elm endophyte from Doth- ideomycetes enhanced host resistance to Dutch elm disease (DED). Here, we hypothesize that the combined effect of these endoph…	Rejected	Biotic stress
APX' + 'gene express'+ 'abiotic stress' + ' plants'+ 'PGPR'	Google scholar	Interaction between Melatonin and NO: Action Mechanisms, Main Targets, and Putative Roles of the Emerging Molecule Nomela	Martínez-Lorente et al., 2022	Melatonin (MEL), a ubiquitous indolamine molecule, has gained interest in the last few decades due to its regulatory role in plant metabolism. Likewise, nitric oxide (NO), a gasotransmitter, can also affect plant molecular pathways due to its function as a signaling molecule. Both MEL and NO can interact at multiple levels under abiotic stress, starting with their own biosynthetic pathways and in…	Rejected	Review
APX' + 'gene express'+ 'abiotic stress' + ' plants'+ 'PGPR'	Google scholar	Transcriptome analysis revealed cellular pathways associated with abiotic stress tolerance and disease resistance induced by Pseudomonas aeruginosa in banana plants	Maulidah et al., 2021	Plants have evolved diverse cellular mechanisms to maintain their fitness under stressful environments. Banana (Musa spp.) plants inoculated with a new rhizobacterial isolate, Pseudomonas aeruginosa strain Y1 (PaY1), showed improved vegetative growth, and increased levels of H2O2, glucosinolates, phenolic compounds, and lignin contents. Plants treated with PaY1 had reduced membrane peroxidation a…	Rejected	Biotic stress
APX' + 'gene express'+ 'abiotic stress' + ' plants'+ 'PGPR'	Google scholar	Regulation of L-proline biosynthesis, signal transduction, transport, accumulation and its vital role in plants during variable environmental conditions	Meena et al., 2019	Background: In response to various environmental stresses, many plant species synthesize L-proline in the cytosol and accumulates in the chloroplasts. L-Proline accumulation in plants is a well-recognized physiological reaction to osmotic stress prompted by salinity, drought and other abiotic stresses. L-Proline plays several protective functions such as osmoprotectant, stabilizing cellular struc…	Rejected	Review
APX' + 'gene express'+ 'abiotic stress' + ' plants'+ 'PGPR'	Google scholar	Inoculation of tomato (Solanum lycopersicum) roots with growth promoting Pseudomonas strains induces distinct local and systemic metabolic biosignatures	Mekureyaw et al., 2022	The genus Pseudomonas harbours numerous strains that positively affect plant growth and defence through diverse mechanisms such as nutrient solubilisation and production of phytohormones or secondary metabolites. The aim of this study was to compare the impact of six plant-beneficial Pseudomonas strains on tomato (Solanum lycopersicum) growth and holobiont physiology. The physiological impact was…	Rejected	No abiotic stress
APX' + 'gene express'+ 'abiotic stress' + ' plants'+ 'PGPR'	Google scholar	CaDHN3, a Pepper (Capsicum annuum L.) Dehydrin Gene Enhances the Tolerance against Salt and Drought Stresses by Reducing ROS Accumulation	Meng et al., 2021	Dehydrins (DHNs) play an important role in abiotic stress tolerance in a large number of plants, but very little is known about the function of DHNs in pepper plants. Here, we isolated a Y1SK2-type DHN gene “CaDHN3” from pepper. To authenticate the function of CaDHN3 in salt and drought stresses, it was overexpressed in Arabidopsis and silenced in pepper through virus-induced gene silencing (VIGS…	Rejected	No PGPR
APX' + 'gene express'+ 'abiotic stress' + ' plants'+ 'PGPR'	Google scholar	Multidimensional Role of Silicon to Activate Resilient Plant Growth and to Mitigate Abiotic Stress	Mir et al., 2022	Sustainable agricultural production is critically antagonistic by fluctuating unfavorable environmental conditions. The introduction of mineral elements emerged as the most exciting and magical aspect, apart from the novel intervention of traditional and applied strategies to defend the abiotic stress conditions. The silicon (Si) has ameliorating impacts by regulating diverse functionalities on e…	Rejected	Review
APX' + 'gene express'+ 'abiotic stress' + ' plants'+ 'PGPR'	Google scholar	The biological approaches of altering the growth and biochemical properties of medicinal plants under salinity stress	Miransari et al., 2021	Due to their interesting properties for human health, medicinal plants are of worldwide interest, including Iran. More has yet to be investigated and analyzed on the use of methods affecting medicinal plant growth and biochemical properties under stress. The important question about medicinal plants is the purpose of their plantation, determining their growth conditions. The present review articl…	Rejected	Review
APX' + 'gene express'+ 'abiotic stress' + ' plants'+ 'PGPR'	Google scholar	Reducing the allelopathic effect of Parthenium hysterophorus L. on wheat (Triticum aestivum L.) by Pseudomonas putida	Mishra et al., 2012		Rejected	Duplicate
APX' + 'gene express'+ 'abiotic stress' + ' plants'+ 'PGPR'	Google scholar	ROS management is mediated by ascorbate-glutathione-α-tocopherol triad in co-ordination with secondary metabolic pathway under cadmium stress in Withania somnifera	Mishra et al., 2019	Being static, plants are frequently exposed to various essential and non-essential heavy metals from the surroundings. This exposure results in considerable ROS generation leading to oxidative stress, the primary re- sponse of the plants under heavy metal stress. Withania somnifera is a reputed Indian medicinal plant in Ayurveda, having various pharmacological activities due to the presence of wi…	Rejected	No PGPR
APX' + 'gene express'+ 'abiotic stress' + ' plants'+ 'PGPR'	Google scholar	ACC deaminase‐producing rhizosphere competent Bacillus spp. mitigate salt stress and promote Zea mays growth by modulating ethylene metabolism	Misra et al., 2020	Plant growth-promoting rhizobacteria (PGPR) are known for growth promotion and mitigating environmental stresses. Here, we examined the propitiousness of three indigenous salt-tolerant PGPR, i.e., Bacillus subtilis (NBRI 28B), B. subtilis (NBRI 33 N), and B. safensis (NBRI 12 M) for plant growth promotion and salt stress amelioration in Zea mays. Results of the in vitro plant growth-promoting att…	Rejected	Review
APX' + 'gene express'+ 'abiotic stress' + ' plants'+ 'PGPR'	Google scholar	Physiological and Phytochemical Responses of Lemon Balm (Melissa officinalis L.) to Pluramin Application and Inoculation with Pseudomonas fluorescens PF-135 under Water-Deficit Stress	Mohammadi et al., 2021	Water-deficit stress is one of the major global challenges in plant production. Biostimulants can help to reduce the harmful impacts of water deficit and improve the growth of the medicinal and aromatic plant species. This study is aimed to examine the role of pluramin metabolic activator and Pseudomonas flu- orescens PF-135 on the performance, physiological properties and secondary metabolites o…	Rejected	Proteomic study
APX' + 'gene express'+ 'abiotic stress' + ' plants'+ 'PGPR'	Google scholar	ROS and Oxidative Response Systems in Plants Under Biotic and Abiotic Stresses: Revisiting the Crucial Role of Phosphite Triggered Plants Defense Response	Mohammadi et al., 2021		Rejected	Duplicate
APX' + 'gene express'+ 'abiotic stress' + ' plants'+ 'PGPR'	Google scholar	Insight Into the Role of PGPR in Sustainable Agriculture and Environment	Mohanty et al., 2021	A multitude of roles is played by microbes in food and agriculture that include nutrient cycling and management, organic matter decomposition and fermentation. Plant growth promoting rhizobacteria (PGPR), representing microbial groups and with ability of colonizing plant roots, influence plant growth through various indirect and direct modes in order to promote its growth and/or protect it from d…	Rejected	Review
APX' + 'gene express'+ 'abiotic stress' + ' plants'+ 'PGPR'	Google scholar	Bio-control agents activate plant immune response and prime susceptible tomato against root-knot nematodes	Molinari et al., 2019	Beneficial microorganisms are generally known to activate plant defense against biotic chal- lenges. However, the molecular mechanisms by which activated plants react more rapidly and actively to pests remain still largely unclear. Tomato plants pre-treated with a mixture of beneficial bio-control agents (BCAs), as soil-drenches, were less sensitive to infection of the root-knot nematode (RKN) Me…	Rejected	Biotic stress
APX' + 'gene express'+ 'abiotic stress' + ' plants'+ 'PGPR'	Google scholar	A review: the beneficial effect of aluminum on plant growth in acid soil and the possible mechanisms	Muhammad et al., 2018	Aluminum (Al) is the third most abundant element in the earth crust and a major factor that inhibit plant growth and reduce crop yield in acid soil. Although substantial amount of research has been done to study the phytotoxic effects of Al and the underlying mechanisms by applying sole Al hydroponically, however, soil is a complex medium containing a lot of mineral elements, allowing occurrence …	Rejected	Review
APX' + 'gene express'+ 'abiotic stress' + ' plants'+ 'PGPR'	Google scholar	Improved salinity tolerance and growth performance in transgenic sunflower plants via ectopic expression of a wheat antiporter gene (TaNHX2)	Mushke et al., 2019	Sunflower (Helianthus annuus. L) is one of the principal oil seed crops affected by the salinity stress, which limits the oil content and crop yield of sunflower plants. The acclimatization of plants to abiotic stresses such as salinity tolerance is mainly mediated by the vacuolar Na+/H+ antiporters (NHX) by tagging Na+ into vacuoles from the cytosol. We show here that the over-expression of whea…	Rejected	No PGPR
APX' + 'gene express'+ 'abiotic stress' + ' plants'+ 'PGPR'	Google scholar	The role of mycorrhizae and plant growth promoting rhizobacteria (PGPR) in improving crop productivity under stressful environments	Nadeem et al., 2014	Both biotic and abiotic stresses are major constrains to agricultural production. Under stress conditions, plant growth is affected by a number of factors such as hormonal and nutritional imbalance, ion toxicity, physiological disorders, susceptibility to diseases, etc. Plant growth under stress conditions may be enhanced by the applica- tion of microbial inoculation including plant growth promot…	Rejected	Review
APX' + 'gene express'+ 'abiotic stress' + ' plants'+ 'PGPR'	Google scholar	Grain Legumes and Fear of Salt Stress: Focus on Mechanisms and Management Strategies	Nadeem et al., 2019	Salinity is an ever-present major constraint and a major threat to legume crops, particularly in areas with irrigated agriculture. Legumes demonstrate high sensitivity, especially during vegetative and reproductive phases. This review gives an overview of legumes sensitivity to salt stress (SS) and mechanisms to cope with salinity stress under unfavorable conditions. It also focuses on the promis…	Rejected	Review
APX' + 'gene express'+ 'abiotic stress' + ' plants'+ 'PGPR'	Google scholar	Research Progress and Perspective on Drought Stress in Legumes: A Review	Nadeem et al., 2019	Climate change, food shortage, water scarcity, and population growth are some of the threatening challenges being faced in today’s world. Drought stress (DS) poses a constant challenge for agricultural crops and has been considered a severe constraint for global agricultural productivity; its intensity and severity are predicted to increase in the near future. Legumes demonstrate high sensitivity…	Rejected	Review
APX' + 'gene express'+ 'abiotic stress' + ' plants'+ 'PGPR'	Google scholar	Salt Priming as a Smart Approach to Mitigate Salt Stress in Faba Bean (Vicia faba L.)	Nasrallah et al., 2019	The present investigation aims to highlight the role of salt priming in mitigating salt stress on faba bean. In the absence of priming, the results reflected an increase in H2O2 generation and lipid peroxidation in plants subjected to 200 mM salt shock for one week, accompanied by a decline in growth, photosynthetic pigments, and yield. As a defense, the shocked plants showed enhancements in asco…	Rejected	No APX
APX' + 'gene express'+ 'abiotic stress' + ' plants'+ 'PGPR'	Google scholar	Drought stress amelioration in wheat through inoculation with Burkholderia phytofirmans strain PsJN	Naveed et al., 2014		Rejected	Duplicate
APX' + 'gene express'+ 'abiotic stress' + ' plants'+ 'PGPR'	Google scholar	Melatonin as Master Regulator in Plant Growth, Development and Stress Alleviator for Sustainable Agricultural Production: Current Status and Future Perspectives	Nawaz et al., 2020	Abstract: Melatonin, a multifunctional signaling molecule, is ubiquitously distributed in different parts of a plant and responsible for stimulating several physiochemical responses against adverse environmental conditions in various plant systems. Melatonin acts as an indoleamine neurotransmitter and is primarily considered as an antioxidant agent that can control reactive oxygen and nitrogen sp…	Rejected	Review
APX' + 'gene express'+ 'abiotic stress' + ' plants'+ 'PGPR'	Google scholar	INFLUENCE OF EXOGENOUSLY APPLIED SALICYLIC ACID AND PLANT GROWTH PROMOTING RHIZOBACTERIA INOCULATION ON THE GROWTH AND PHYSIOLOGY OF SUNFLOWER (HELIANTHUS ANNUUS L.) UNDER SALT STRESS	NAZ et al., 2013	Present attempt is to evaluate the effect of Salicylic acid (SA) alone and in combination with plant growth promoting rhizobacteria (Azospirillum and Pseudomonas) on sunflower plant under salt stress. Two hybrids of sunflower were inoculated with Azospirillum spp. and Pseudomonas spp. applied as seed soaking treatment prior to sowing. Salt stress (20dSm-1) was induced 28d after sowing. Foliar app…	Rejected	No APX
APX' + 'gene express'+ 'abiotic stress' + ' plants'+ 'PGPR'	Google scholar	A Review on Practical Application and Potentials of Phytohormone-Producing Plant Growth-Promoting Rhizobacteria for Inducing Heavy Metal Tolerance in Crops	Li et al., 2020	Water scarcity and high input costs have compelled farmers to use untreated wastewater and industrial effluents to increase profitability of their farms. Normally, these effluents improve crop productivity by serving as carbon source for microbes, providing nutrients to plants and microbes, and improving soil physicochemical and biological properties. They, however, may also contain significant c…	Rejected	Review
APX' + 'gene express'+ 'abiotic stress' + ' plants'+ 'PGPR'	Google scholar	Plant growth promoting bacteria (PGPR) induce antioxidant tolerance against salinity stress through biochemical and physiological mechanisms	Neshat et al., 2022	Salinity is one of the most severe abiotic stress in the world. Also, the irrigated lands have been treated with second salinity. Canola is one of the most important industrial crops for oil production all over the world which is affected by salinity. Salt stress causes imbalanced ion hemostasis (Na? and K?) and interrupted mineral absorp- tion in canola. Also, salinity stress leads to oxidative …	Rejected	Proteomic study
APX' + 'gene express'+ 'abiotic stress' + ' plants'+ 'PGPR'	Google scholar	Exogenous Melatonin Confers Cadmium Tolerance by Counterbalancing the Hydrogen Peroxide Homeostasis in Wheat Seedlings	Ni et al., 2018	Melatonin has emerged as a research highlight regarding its important role in regulating plant growth and the adaptation to the environmental stresses. In this study, we investigated how melatonin prevented the cadmium toxicity to wheat seedlings. The results demonstrated that cadmium induced the expression of melatonin biosynthesis-related genes and cause a significant increase of endogenous mel…	Rejected	No PGPR
APX' + 'gene express'+ 'abiotic stress' + ' plants'+ 'PGPR'	Google scholar	Below-ground-above-ground Plant-microbial Interactions: Focusing on Soybean, Rhizobacteria and Mycorrhizal Fungi	Nicholas et al., 2018		Rejected	Review
APX' + 'gene express'+ 'abiotic stress' + ' plants'+ 'PGPR'	Google scholar	MECHANISMS OF PLANT RESPONSE TO SALINITY STRESS: CURRENT UNDERSTANDING AND RECENT PROGRESS	Nie et al., 2020	Salinity is considered as a major abiotic stress for plants as it challenges plant growth and productivity severely. Plants have developed plenty of biochemical, physiological and metabolic strategies to deal with salt stress at multiple levels. A better understanding of these contrivances is an important step towards achieving the goal of sustainable development of agriculture. This review aims …	Rejected	Review
APX' + 'gene express'+ 'abiotic stress' + ' plants'+ 'PGPR'	Google scholar	Coping With Metal Toxicity – Cues From Halophytes	Nikalje et al., 2018	Being the native flora of saline soil, halophytes are well studied for their salt tolerance and adaptation mechanism at the physiological, biochemical, molecular and metabolomic levels. However, these saline habitats are getting contaminated due to various anthropogenic activities like urban waste, agricultural runoff, mining, industrial waste that are rich in toxic metals and metalloids. These t…	Rejected	Review
APX' + 'gene express'+ 'abiotic stress' + ' plants'+ 'PGPR'	Google scholar	Heavy metal and metalloid toxicity in horticultural plants: Tolerance mechanism and remediation strategies	Noor et al., 2022	Heavy metal/metalloids (HMs) are among the primary soil pollutants that limit crop production worldwide. Plants grown in HM contaminated soils exhibit reduced growth and development, resulting in a decrease in crop production. The exposure to HMs induces plant oxidative stress due to the formation of free radicals, which alter plant morphophysiological and biochemical mechanisms at cellular and t…	Rejected	review
APX' + 'gene express'+ 'abiotic stress' + ' plants'+ 'PGPR'	Google scholar	Streptomyces spp. enhance vegetative growth of maize plants under saline stress	Nozari et al., 2021	Saline stress is one of the abiotic stresses that most compromises the yield of crops and can be mitigated by plant growth- promoting rhizobacteria (PGPR). This work characterized rhizobacteria isolates from the genus Streptomyces as PGPR and evaluated their role on growth and alleviation of the effects caused by saline stress in maize (Zea mays L.). Production of indolic compounds (IC), sideroph…	Rejected	No APX
APX' + 'gene express'+ 'abiotic stress' + ' plants'+ 'PGPR'	Google scholar	Plant growth promoting bacteria as an alternative strategy for salt tolerance in plants: A review	Numan et al., 2018	Approximately 5.2 billion hectare agriculture land are affected by erosion, salinity and soil degradation. Salinity stress has significantly affecting the fertile lands, and therefore possesses a huge impact on the agriculture and economy of a country. Salt stress has severe effects on the growth and development of plants as well as reducing its yield. Plants are inherently equipped with stress t…	Rejected	review
APX' + 'gene express'+ 'abiotic stress' + ' plants'+ 'PGPR'	Google scholar	Microbial and Plant-Assisted Bioremediation of Heavy Metal Polluted Environments: A Review	Ojuederie et L., 2017.	Environmental pollution from hazardous waste materials, organic pollutants and heavy metals, has adversely affected the natural ecosystem to the detriment of man. These pollutants arise from anthropogenic sources as well as natural disasters such as hurricanes and volcanic eruptions. Toxic metals could accumulate in agricultural soils and get into the food chain, thereby becoming a major threat t…	Rejected	review
APX' + 'gene express'+ 'abiotic stress' + ' plants'+ 'PGPR'	Google scholar	Potassium phosphite increases tolerance to UV-B in potato	Oyarburo et al., 2015	The use of biocompatible chemical compounds that enhance plant disease resistance through Induced Resistance (IR) is an innovative strategy to improve the yield and quality of crops. Phosphites (Phi), inorganic salts of phosphorous acid, are environment friendly, and have been described to induce disease control. Phi, similar to other plant inductors, are thought to be effective against different…	Rejected	No PGPR
APX' + 'gene express'+ 'abiotic stress' + ' plants'+ 'PGPR'	Google scholar	Saline Soil-based Agriculture by Halotolerant Microorganisms	Panda et al., 2019		Rejected	Book
APX' + 'gene express'+ 'abiotic stress' + ' plants'+ 'PGPR'	Google scholar	Potential use of Rhizobacteria as Biofertilizer and its Role in Increasing Tolerance to Drought Stress	Pandey et al., 2015		Rejected	Chapter book
APX' + 'gene express'+ 'abiotic stress' + ' plants'+ 'PGPR'	Google scholar	Streptomyces can be an excellent plant growth manager	Pang et al., 2022	Streptomyces, the most abundant and arguably the most important genus of actinomycetes, is an important source of biologi- cally active compounds such as antibiotics, and extracellular hydrolytic enzymes. Since Streptomyces can have a beneficial symbiotic relationship with plants they can contribute to nutrition, health and fitness of the latter. This review article sum- marizes recent research c…	Rejected	Review
APX' + 'gene express'+ 'abiotic stress' + ' plants'+ 'PGPR'	Google scholar	Influence of soil ameliorants and microflora on induction of antioxidant enzymes and growth promotion of Jatropha curcas L. under saline condition	Patel et al., 2013	This study investigated the influence of inoculation with plant growth promoting rhizobacterium, Enterobacter clocae (MSA), Pseudomonas pseudoalcaligenes (MSC) and Bacillus sp., with a mycorrhizal fungus, Glomus intraradices, on seed germination parameters, vegetative growth, mineral nutrient uptake in leaves of Jatropha curcas L., soil nutrient management, antioxidant enzyme activities, phosphat…	Rejected	No APX
APX' + 'gene express'+ 'abiotic stress' + ' plants'+ 'PGPR'	Google scholar	Kappaphycus alvarezii sap mitigates abiotic-induced stress in Triticum durum by modulating metabolic coordination and improves growth and yield	Patel et al., 2018	Kappaphycus alvarezii sap (K-sap) facilitates plant growth in stressful environments by regulating the stress signalling compo- nents of the plant system. In the present study, the effect of K-sap on three durum wheat varieties, commercially important for pasta and semolina is studied in response to salt and drought stress during both vegetative and reproductive growth phases. The application of …	Rejected	No PGPR
APX' + 'gene express'+ 'abiotic stress' + ' plants'+ 'PGPR'	Google scholar	Role of plant growth-promoting bacteria in sustainable agriculture	Pathania et al., 2020	The requirement for chem ical fertilizers is expected to increase to 200 million tonnes by the year 2022. In- creased dependence offarmersonchemicalformulationshasstrengthened agronomic productionbuthas also increased environmental pollution and put the ecosystem stability at higher risk worldwide. Climatic changes have further aggravated the situation by an increase in the frequency of abiotic s…	Rejected	Review
APX' + 'gene express'+ 'abiotic stress' + ' plants'+ 'PGPR'	Google scholar	Endophytic bacteria enhancing growth and disease resistance of potato (Solanum tuberosum L.)	Pavlo et al., 2011	Priming plants by non-pathogenic bacteria allows the host to save energy and to reduce time needed for development of defense reaction during a pathogen attack. However, information on the role of endophytes in plant defense is limited. Here, the ability of endophytic bacteria to promote growth and resistance of potato plants towards infection by the necrotroph Pectobacterium atrosepticum was stu…	Rejected	biotic stress
APX' + 'gene express'+ 'abiotic stress' + ' plants'+ 'PGPR'	Google scholar	Microbe-mediated amelioration of salinity stress in plants	Phurailatpam et al., 2021		Rejected	Duplicate
APX' + 'gene express'+ 'abiotic stress' + ' plants'+ 'PGPR'	Google scholar	Improvement of cumin (Cuminum cyminum) seed performance under T drought stress by seed coating and biopriming	Piri et al., 2019	Cumin (Cuminum cyminum L.) is an annual plant with medicinal properties including numerous stimulus ap- petites; strengthen the stomach, anti-flatulence, which has low germination, vigor, storage substances, and weak establishment in the soil. In order to improve the physical and physiological properties and investigate the effect of seed coating and biopriming on morphological and biochemical in…	Rejected	Fungi
APX' + 'gene express'+ 'abiotic stress' + ' plants'+ 'PGPR'	Google scholar	Understanding the molecular basis of the tripartite interaction between host-pathogen-bioagent through proteomic approach	Prabhukarthikeyan et al., 2020		Rejected	Chapter book
APX' + 'gene express'+ 'abiotic stress' + ' plants'+ 'PGPR'	Google scholar	Proposed some interactions at molecular level of PGPR coinoculated with Bradyrhizobium diazoefficiens USDA110 and B. japonicum THA6 on soybean symbiosis and its potential of field application	Prakamhang et al., 2015	The objectives of this research were to select the appropriate plant growth promoting rhizobacteria (PGPR) and evaluate their influence in promoting nodulation and N2-fixing efficiency of soybean (Glycine max) by coinoculation with Bradyrhizobium diazoefficiens USDA110 and B. japonicum THA6 strains. Selected 12 PGPR performed a significant capability of promoting N2-fixation, nodule number, nodul…	Rejected	No APX
APX' + 'gene express'+ 'abiotic stress' + ' plants'+ 'PGPR'	Google scholar	Signal Molecules Mediate the Impact of the Earthworm Aporrectodea caliginosa on Growth, Development and Defence of the Plant Arabidopsis thaliana	Puga-Freitas et al., 2012	Earthworms have generally a positive impact on plant growth, which is often attributed to a trophic mechanism: namely, earthworms increase the release of mineral nutrients from soil litter and organic matter. An alternative hypothesis has been proposed since the discovery of a signal molecule (Indole Acetic Acid) in earthworm faeces. In this study, we used methodologies developed in plant science…	Rejected	No PGPR
APX' + 'gene express'+ 'abiotic stress' + ' plants'+ 'PGPR'	Google scholar	Pre treatment with Bacillus subtilis mitigates drought induced photo-oxidative damages in okra by modulating antioxidant system and photochemical activity	Puthiyottil et al., 2021	Growth promoting potential of Bacillus subtilis (BS) in drought stressed Abelmoschus esculentus (L.) Moench (okra) was assessed by measuring the chlorophyll stability index (CSI), chlorophyll a (Chl-a) fluorescence, leaf osmotic potential and lipid peroxidation by malondi- aldehyde content, emission of reactive oxygen species (ROS), osmolyte content and the activity of non-enzyme and enzyme antio…	Rejected	Proteomic study
APX' + 'gene express'+ 'abiotic stress' + ' plants'+ 'PGPR'	Google scholar	Phytohormones Producing Acinetobacter bouvetii P1 Mitigates Chromate Stress in Sunflower by Provoking Host Antioxidant Response	Qadir et al., 2021	Different physical and chemical techniques are used for the decontamination of Cr+6 con- taminated sites. The techniques are expensive, laborious, and time-consuming. However, remediation of Cr+6 by microbes is viable, efficient, and cost-effective. In this context, plant growth-promoting rhizobacteria Acinetobacter bouvetii P1 isolated from the industrial zone was tested for its role in relievin…	Rejected	Proteomic study
APX' + 'gene express'+ 'abiotic stress' + ' plants'+ 'PGPR'	Google scholar	Bacillus: A Biological Tool for Crop Improvement through Bio-Molecular Changes in Adverse Environments	Radhakrishnan et al., 2017		Rejected	Duplicate
APX' + 'gene express'+ 'abiotic stress' + ' plants'+ 'PGPR'	Google scholar	Up-regulation of antioxidative defense systems by glycine betaine foliar application in onion plants confer tolerance to salinity stress	Rady et al., 2018	Plants face a lot of abiotic stresses, during their life cycle, including salinity that greatly influences their growth and entire metabolism. Osmoprotectants have to enable plant to beat such stress. Two-season field experiments were conducted consecutively in 2015/16 and 2016/17 to study the effect of glycine betaine (GB) foliar ap- plication at three levels (0; a control, 25 and 50 mM) on onio…	Rejected	Proteomic study
APX' + 'gene express'+ 'abiotic stress' + ' plants'+ 'PGPR'	Google scholar	Exogenously Applied Sodium Nitroprusside Mitigates Lead Toxicity in Rice by Regulating Antioxidants and Metal Stress-Related Transcripts	Rahim et al., 2022	Sustainable agriculture is increasingly being put in danger by environmental contamination with dangerous heavy metals (HMs), especially lead (Pb). Plants have developed a sophisticated mechanism for nitric oxide (NO) production and signaling to regulate hazardous effects of abiotic factors, including HMs. In the current study, we investigated the role of exogenously applied sodium nitroprusside …	Rejected	No PGPR
APX' + 'gene express'+ 'abiotic stress' + ' plants'+ 'PGPR'	Google scholar	Hydrogen sulfide (H2S) underpins the beneficial silicon effects against the copper oxide nanoparticles (CuO NPs) phytotoxicity in Oryza sativa seedlings	Rai et al., 2021	Nanoparticle-pollution has associated severe negative effects on crop productivity. Hence, methods are needed to alleviate nano-toxicity in crop plants. The present study aims to evaluate if the exogenous hydrogen sulfide (H2S) application in combination with silicon (Si) could palliate the harmful effects of copper oxide nanoparticles (CuO NPs). Fifteen day-old rice (Oryza sativa L.) seedlings w…	Rejected	No PGPR
APX' + 'gene express'+ 'abiotic stress' + ' plants'+ 'PGPR'	Google scholar	Seed priming with melatonin: A promising approach to combat abiotic stress in plants	Rajora et al., 2022	Melatonin is an indolic compound derived from tryptophan and has an important role in the general processes of plants including germination, photosynthesis, circadian rhythms, flowering, senescence, and alleviating stress. Integrating melatonin application to agronomical practices reportedly provides numerous benefits. More particularly seed priming with melatonin has been shown to improve seed g…	Rejected	review
APX' + 'gene express'+ 'abiotic stress' + ' plants'+ 'PGPR'	Google scholar	Plant Growth and Stress Physiology	Ramos-Solano et al., 2021		Rejected	Book
APX' + 'gene express'+ 'abiotic stress' + ' plants'+ 'PGPR'	Google scholar	Sustainable production through biostimulants under fruit orchards	Rana et al., 2022	The world population is expected to be around 9 billion by 2050 which would be 34 per cent greater than the today’s population. This will enhance the food demand to match the rising population. Horticultural commodities in general and fruit in the particular has been designated as the source of nutraceuticals. For reaching up optimum level of pro- duction, Biostimulants may come up with and the e…	Rejected	review
APX' + 'gene express'+ 'abiotic stress' + ' plants'+ 'PGPR'	Google scholar	Developing Climate-Resilient Chickpea Involving Physiological and Molecular Approaches With a Focus on Temperature and Drought Stresses	Rani et al., 2020	Chickpea is one of the most economically important food legumes, and a significant source of proteins. It is cultivated in more than 50 countries across Asia, Africa, Europe, Australia, North America, and South America. Chickpea production is limited by various abiotic stresses (cold, heat, drought, salt, etc.). Being a winter-season crop in northern south Asia and some parts of the Australia, ch…	Rejected	review
APX' + 'gene express'+ 'abiotic stress' + ' plants'+ 'PGPR'	Google scholar	Drought‐tolerant Bacillus megaterium isolated from semi‐arid conditions induces systemic tolerance of wheat under drought conditions	Rashid et al., 2022		Rejected	Duplicate
APX' + 'gene express'+ 'abiotic stress' + ' plants'+ 'PGPR'	Google scholar	Melatonin in Plant Defense against Abiotic Stress	Rehaman et al., 2021	Abiotic stress adversely affects plant growth and metabolism and as such reduces plant productivity. Recognized as a major contributor in the production of reactive oxygen species (ROS), it hinders the growth of plants through induction of oxidative stress. Biostimulants such as melatonin have a multifunctional role, acting as a defense strategy in minimizing the effects of oxidative stress. Mela…	Rejected	review
APX' + 'gene express'+ 'abiotic stress' + ' plants'+ 'PGPR'	Google scholar	Seed Priming with Phytohormones: An Effective Approach for the Mitigation of Abiotic Stress	Rhaman et al., 2020		Rejected	Duplicate
APX' + 'gene express'+ 'abiotic stress' + ' plants'+ 'PGPR'	Google scholar	Acquisition of phosphorus and nitrogen in the rhizosphere and plant growth promotion by microorganisms	Richardson et al., 2009	The rhizosphere is a complex environment where roots interact with physical, chemical and biological properties of soil. Structural and functional characteristics of roots contribute to rhizosphere processes and both have significant influence on the capacity of roots to acquire nutrients. Roots also interact extensively with soil microorganisms which further impact on plant nutrition either dire…	Rejected	review
APX' + 'gene express'+ 'abiotic stress' + ' plants'+ 'PGPR'	Google scholar	Reducing Drought Stress in Plants by Encapsulating Plant Growth-Promoting Bacteria with Polysaccharides	Riseh et al., 2021		Rejected	Duplicate
APX' + 'gene express'+ 'abiotic stress' + ' plants'+ 'PGPR'	Google scholar	Comparative analysis of BABA and Piriformospora indica mediated priming of defence-related genes in tomato against early blight	Roylawar et al., 2015	Pre-treatment with BABA or pre-colonization of roots with Piriformospora indica resulted in decreased disease severity in tomato caused by early blight. BABA was found to be more efficient in inhibiting the area of necrotic lesions. Expression profiles of SlWRKY1, SlWRKY11, SlWRKY39, SlWRKY53, SlWRKY70, PR1b, PR2 GLA, PR3 ACHI, PR3 BCHI, PR7, PDF1.2 and NPR1 genes were compared during BABA- and P…	Rejected	biotic stress
APX' + 'gene express'+ 'abiotic stress' + ' plants'+ 'PGPR'	Google scholar	Rhizosphere engineering and management for sustainable agriculture	Ryan et al., 2009	This paper reviews strategies for manipu- lating plants and their root-associated microorganisms to improve plant health and productivity. Some strategies directly target plant processes that impact on growth, while others are based on our knowledge of interactions among the components of the rhizosphere (roots, microorganisms and soil). For instance, plants can be engineered to modify the rhizos…	Rejected	review
APX' + 'gene express'+ 'abiotic stress' + ' plants'+ 'PGPR'	Google scholar	Abiotic Stress and Reactive Oxygen Species: Generation, Signaling, and Defense Mechanisms	Sachdev et al., 2021		Rejected	Duplicate
APX' + 'gene express'+ 'abiotic stress' + ' plants'+ 'PGPR'	Google scholar	Engineering bacterial ACC deaminase for improving plant productivity under stressful conditions	Saghafi et al., 2020		Rejected	Chapter book
APX' + 'gene express'+ 'abiotic stress' + ' plants'+ 'PGPR'	Google scholar	Abiotic Stress and Belowground Microbiome: The Potential of Omics Approaches	Sandrini et al., 2022	Nowadays, the worldwide agriculture is experiencing a transition process toward more sustainable production, which requires the reduction of chemical inputs and the preservation of microbiomes’ richness and biodiversity. Plants are no longer considered as standalone entities, and the future of agriculture should be grounded on the study of plant-associated microorganisms and all their potentialit…	Rejected	Review
APX' + 'gene express'+ 'abiotic stress' + ' plants'+ 'PGPR'	Google scholar	Arbuscular mycorrhiza effects on plant performance under osmotic stress	Santander et al., 2017		Rejected	Duplicate
APX' + 'gene express'+ 'abiotic stress' + ' plants'+ 'PGPR'	Google scholar	Priming of defense‐related genes in Brassica oleracea var. capitata using concentrated metabolites produced by Rhizobium tropici CIAT 899	Santos et al., 2022	To verify the potential of metabolites extracted from Rhizobium tropici to trigger the priming of defense responses in crucif- erous plants, we analyzed the expression of defense-related genes by qRT-PCR. Brassica oleracea var. capitata, susceptible to Xanthomonas campestris pv. campestris, were grown in greenhouse conditions. At 18 days after sowing, plants were inoculated with 1 mL of 1% concen…	Rejected	biotic stress
APX' + 'gene express'+ 'abiotic stress' + ' plants'+ 'PGPR'	Google scholar	Selenium biofortification in the 21st century: status and challenges for healthy human nutrition	Schiavon et al., 2020	Background Selenium (Se) is an essential element for mammals and its deficiency in the diet is a global problem. Plants accumulate Se and thus represent a major source of Se to consumers. Agronomic biofortification intends to enrich crops with Se in order to secure its adequate supply by people. Scope The goal of this review is to report the present knowledge of the distribution and processes of …	Rejected	review
APX' + 'gene express'+ 'abiotic stress' + ' plants'+ 'PGPR'	Google scholar	Drought Stress Impacts on Plants and Different Approaches to Alleviate Its Adverse Effects	Seleiman et al., 2021	Drought stress, being the inevitable factor that exists in various environments without recognizing borders and no clear warning thereby hampering plant biomass production, quality, and energy. It is the key important environmental stress that occurs due to temperature dynamics, light intensity, and low rainfall. Despite this, its cumulative, not obvious impact and multidimensional nature severel…	Rejected	review
APX' + 'gene express'+ 'abiotic stress' + ' plants'+ 'PGPR'	Google scholar	UV‐B Priming of Oryza sativa Seeds Augments the Innate Tolerance Potential in a Tolerant Variety more Effectively Toward NaCl and PEG Stressors	Sen et al., 2021	NaCl and polyethylene glycol-6000 (PEG) stressors are the major limitation factors for successful seedling establishment in rice. The present study was carried out to investigate the role of UV-B priming on the augmentation of stress tolerance in tolerant and sensitive rice seedlings exposed to NaCl and PEG stresses. The result shows that the severity of drought than salinity stress was experienc…	Rejected	No PGPR
APX' + 'gene express'+ 'abiotic stress' + ' plants'+ 'PGPR'	Google scholar	A Review on Mechanisms of Plant Tolerance and Role of Transgenic Plants in Environmental Clean-up	Seth et al., 2012	This article deals with the advances and implication of phytoremediation technologies with emphasis on remediation of toxic heavy metals from contaminated soil. Most of the conventional remedial technologies are expensive and inhibit the soil fertility and cause negative impacts on various ecosystem services. However, phytoremediation is a cost effective and ecofriendly approach, which does not a…	Rejected	review
APX' + 'gene express'+ 'abiotic stress' + ' plants'+ 'PGPR'	Google scholar	Synergistic Effect of Bacillus thuringiensis IAGS 199 and Putrescine on Alleviating Cadmium-Induced Phytotoxicity in Capsicum annum	Shah et al., 2020	Plant growth-promoting bacteria (PGPB) and putrescine (Put) have shown a promising role in the mitigation of abiotic stresses in plants. The present study was anticipated to elucidate the potential of Bacillus thuringiensis IAGS 199 and Put in mitigation of cadmium (Cd)-induced toxicity in Capsicum annum. Cadmium toxicity decreased growth, photosynthetic rate, gas exchange attributes and activity…	Rejected	Proteomic study
APX' + 'gene express'+ 'abiotic stress' + ' plants'+ 'PGPR'	Google scholar	Ameliorative role of Bacillus subtilis FBL-10 and silicon against lead induced stress in Solanum melongena	Shah et al., 2021	The continuous deterioration of arable lands by metal pollution compels finding suitable strategies to increase plant tolerance under contaminated regimes. Current study was designed to examine the synergistic role of Bacillus subtilis FBL-10 and silicon (Si) with respect to mitigation of lead (Pb) induced phytotoxicity in Solanum melongena L. Lead stress (75 mg kg− 1) reduced chlorophyll (Chl) c…	Rejected	Proteomic study
APX' + 'gene express'+ 'abiotic stress' + ' plants'+ 'PGPR'	Google scholar	Karrikinolide alleviates salt stress in wheat by regulating the redox and K+/ Na+ homeostasis	Shah et al., 2022	Karrikinolide (KAR1), identified in biochars, has gained research attention because of its significant role in seed germination, seedling development, root development, and abiotic stresses. However, KAR1 regulation of salt stress in wheat is elusive. This study investigated the physiological mechanism involved in KAR1 alleviation of salt stress in wheat. The results showed KAR1 boosted seed germ…	Rejected	No PGPR
APX' + 'gene express'+ 'abiotic stress' + ' plants'+ 'PGPR'	Google scholar	Plant growth-promoting Bacillus sp. strain SDA-4 confers Cd tolerance by physio-biochemical improvements, better nutrient acquisition and diminished Cd uptake in Spinacia oleracea L.	Shahid et al., 2020	Cadmium (Cd) is highly toxic metal for plant metabolic processes even in low concentration due to its longer half-life and non-biodegradable nature. The current study was designed to assess the bioremediation potential of a Cd-tolerant phytobeneficial bacterial strain Bacillus sp. SDA-4, isolated, characterized and identified from Chakera wastewater reservoir, Faisalabad, Pakistan, together with …	Rejected	Proteomic study
APX' + 'gene express'+ 'abiotic stress' + ' plants'+ 'PGPR'	Google scholar	Insights into the Physiological and Biochemical Impacts of Salt Stress on Plant Growth and Development	Shahid et al., 2020	Climate change is causing soil salinization, resulting in crop losses throughout the world. The ability of plants to tolerate salt stress is determined by multiple biochemical and molecular pathways. Here we discuss physiological, biochemical, and cellular modulations in plants in response to salt stress. Knowledge of these modulations can assist in assessing salt tolerance potential and the mech…	Rejected	Review
APX' + 'gene express'+ 'abiotic stress' + ' plants'+ 'PGPR'	Google scholar	Salt Stress in Brassica: Effects, Tolerance Mechanisms, and Management	Shahzad et al., 2022	Brassica genus includes several agronomically important brassica species, and their yield performance is being affected by salt stress. Salt stress considerably reduces Brassica species growth and development by disrupting photosynthesis, leaf gas exchange, vegetative, and reproductive growth. Nonetheless, Brassica exhibits numerous salt stress tolerating mechanisms, and by targeting such potenti…	Rejected	Review
APX' + 'gene express'+ 'abiotic stress' + ' plants'+ 'PGPR'	Google scholar	Variations in response of CaPAO and CaATG8c genes, hormone, photosynthesis and antioxidative system in pepper genotypes under salinity stress	Sham et al., 2021	The present study aimed to explore the effect of salinity on the expression of CaPAO and CaATG8c genes as well as the tolerance mechanism in pepper genotypes (Dolmalik, Carliston, and Maras). Salt-stress resulted in a considerable decrease in plant growth, photosynthetic activity, carboxylation efficiency, and cytokinin, in addition to SOD, APX, GR, GSH and GSH/GSSG in Dolmalik and Carliston geno…	rejected	No PGPR
APX' + 'gene express'+ 'abiotic stress' + ' plants'+ 'PGPR'	Google scholar	Modulation of insect-induced oxidative stress responses by microbial fertilizers in Brassica juncea	Sharma et al., 2020	Microbial fertilizers have increasingly gained popularity as environmentally sustainable nutritional supplement for plant growth. However, the effect of these microbes on plant-induced responses and the resultant effect on late-arriving herbivores are still unclear. Following insect herbivory, oxidative stress is one of the earliest responses induced in plants. Therefore, we analyzed the effect o…	rejected	Biotic stress
APX' + 'gene express'+ 'abiotic stress' + ' plants'+ 'PGPR'	Google scholar	Antioxidants in Plant-Microbe Interaction	Sharma et al., 2021		rejected	Book
APX' + 'gene express'+ 'abiotic stress' + ' plants'+ 'PGPR'	Google scholar	Arbuscular Mycorrhiza-Mediated Regulation of Polyamines and Aquaporins During Abiotic Stress: Deep Insights on the Recondite Players	Sharma et al., 2021	Environmental stresses of (a)biotic origin induce the production of multitudinous compounds (metabolites and proteins) as protective defense mechanisms in plants. On account of the regulation of some of these compounds, arbuscular mycorrhizal fungi (AMF) reinforce the inherent tolerance of plants toward the stress of different origins and kind. This article reviews two specific fundamental mechan…	rejected	Review
APX' + 'gene express'+ 'abiotic stress' + ' plants'+ 'PGPR'	Google scholar	Boron: Functions and Approaches to Enhance Its Availability in Plants for Sustainable Agriculture	Shireen et al., 2018	Boron (B) is an essential trace element required for the physiological functioning of higher plants. B deficiency is considered as a nutritional disorder that adversely affects the metabolism and growth of plants. B is involved in the structural and functional integrity of the cell wall and membranes, ion fluxes (H+, K+, PO43−, Rb+, Ca2+) across the membranes, cell division and elongation, nitrog…	Rejected	review
APX' + 'gene express'+ 'abiotic stress' + ' plants'+ 'PGPR'	Google scholar	Trichoderma harzianum- mediated reprogramming of oxidative stress response in root apoplast of sunflower enhances defence against Rhizoctonia solani	Singh et al., 2011	Trichoderma harzianum is an effective biocontrol agent against the devastating plant pathogen Rhizoctonia solani. Despite its wide application in agriculture, the mechanisms of biocontrol are not yet fully understood. Mycoparasitism and antibiosis are suggested, but may not be sole cause of disease reduction. In the present study, we investigated the role of oxidant-antioxidant metabolites in the…	Rejected	Biotic stress
APX' + 'gene express'+ 'abiotic stress' + ' plants'+ 'PGPR'	Google scholar	A SNARE-Like Superfamily Protein SbSLSP from the Halophyte Salicornia brachiata Confers Salt and Drought Tolerance by Maintaining Membrane Stability, K+/Na+ Ratio, and Antioxidant Machinery	Singh et al., 2016	About 1000 salt-responsive ESTs were identified from an extreme halophyte Salicornia brachiata. Among these, a novel salt-inducible gene SbSLSP (Salicornia brachiata SNARE-like superfamily protein), showed up-regulation upon salinity and dehydration stress. The presence of cis-regulatory motifs related to abiotic stress in the putative promoter region supports our finding that SbSLSP gene is indu…	Rejected	No PGPR
APX' + 'gene express'+ 'abiotic stress' + ' plants'+ 'PGPR'	Google scholar	Plant Growth Promoting Rhizobacteria: Application in Biofertilizers and Biocontrol of Phytopathogens	Singh et al., 2019		Rejected	Chapter book
APX' + 'gene express'+ 'abiotic stress' + ' plants'+ 'PGPR'	Google scholar	Seed Biopriming with Microbial Inoculant Triggers Local and Systemic Defense Responses against Rhizoctonia solani Causing Banded Leaf and Sheath Blight in Maize (Zea mays L.)	Singh et al., 2020	Plant growth promoting rhizobacteria Pseudomonas aeruginosa strain MF-30 isolated from maize rhizosphere was characterized for several plant growth stimulating attributes. The strain MF-30 was also evaluated for antifungal properties against Rhizoctonia solani causing banded leaf and sheath blight in maize (Zea mays L.) under in vitro conditions and was found to have higher mycelial growth suppre…	Rejected	Biotic stress
APX' + 'gene express'+ 'abiotic stress' + ' plants'+ 'PGPR'	Google scholar	Diazotrophic Bacteria Pantoea dispersa and Enterobacter asburiae Promote Sugarcane Growth by Inducing Nitrogen Uptake and Defense-Related Gene Expression	Singh et al., 2021	Sugarcane is a major crop in tropical and subtropical regions of the world. In China, the application of large amounts of nitrogen (N) fertilizer to boost sugarcane yield is commonplace, but it causes substantial environmental damages, particularly soil, and water pollution. Certain rhizosphere microbes are known to be beneficial for sugarcane production, but much of the sugarcane rhizosphere mic…	Rejected	No APX
APX' + 'gene express'+ 'abiotic stress' + ' plants'+ 'PGPR'	Google scholar	N-acyl homoserine lactone Mediated Quorum Sensing Exhibiting Plant Growth-promoting and Abiotic Stress Tolerant Bacteria Demonstrates Drought Stress Amelioration	Singh et al., 2022		Rejected	Duplicate
APX' + 'gene express'+ 'abiotic stress' + ' plants'+ 'PGPR'	Google scholar	Fab Advances in Fabaceae for Abiotic Stress Resilience: From ‘Omics’ to Artificial Intelligence	Singh et al., 2021	Legumes are a better source of proteins and are richer in diverse micronutrients over the nutritional profile of widely consumed cereals. However, when exposed to a diverse range of abiotic stresses, their overall productivity and quality are hugely impacted. Our limited understanding of ge- netic determinants and novel variants associated with the abiotic stress response in food legume crops res…	Rejected	Review
APX' + 'gene express'+ 'abiotic stress' + ' plants'+ 'PGPR'	Google scholar	How does proteomics target plant environmental stresses in a semi‐arid area?	Sobhanian et al., 2020	Southwest Asia, in most parts, is recognized as arid and semi-arid ecosystems (For instance around 90% in Iran). Abiotic stresses, especially salt and drought, are main stresses in this region that limit the crop yields. Furthermore, the level of soil salinization is increasing. Therefore, many researchers are focusing on these two stresses. Specifically, in Iran, the use of plant proteomics date…	Rejected	Review
APX' + 'gene express'+ 'abiotic stress' + ' plants'+ 'PGPR'	Google scholar	Improving Regulation of Enzymatic and Non-Enzymatic Antioxidants and Stress-Related Gene Stimulation in Cucumber mosaic cucumovirus-Infected Cucumber Plants Treated with Glycine Betaine, Chitosan and Combination	Sofy et al., 2020	Cucumber mosaic cucumovirus (CMV) is a deadly plant virus that results in crop-yield losses with serious economic consequences. In recent years, environmentally friendly components have been developed to manage crop diseases as alternatives to chemical pesticides, including the use of natural compounds such as glycine betaine (GB) and chitosan (CHT), either alone or in combination. In the present…	Rejected	Biotic stress
APX' + 'gene express'+ 'abiotic stress' + ' plants'+ 'PGPR'	Google scholar	ACC deaminase containing endophytic bacteria ameliorate salt stress in Pisum sativum through reduced oxidative damage and induction of antioxidative defense systems	Sofy et al., 2021	Approximately 6% of the world’s total land area and 20% of the irrigated land are affected by salt stress. Egypt is one such country affected by salt-stress problems. This paper focuses on the role of isolated bacteria, such as Bacillus subtilis and Pseudomonas fluorescens, in alleviating the harmful effects of salt stress. The results show that the irrigation of plants with different concentrati…	Rejected	No APX
APX' + 'gene express'+ 'abiotic stress' + ' plants'+ 'PGPR'	Google scholar	Enhanced Arsenic Tolerance in Triticum aestivum Inoculated with Arsenic-Resistant and Plant Growth Promoter Microorganisms from a Heavy Metal-Polluted Soil	Soto et al., 2019	In soils multi-contaminated with heavy metal and metalloids, the establishment of plant species is often hampered due to toxicity. This may be overcome through the inoculation of beneficial soil microorganisms. In this study, two arsenic-resistant bacterial isolates, classified as Pseudomonas gessardii and Brevundimonas intermedia, and two arsenic-resistant fungi, classified as Fimetariella raben…	Rejected	No drought stress
APX' + 'gene express'+ 'abiotic stress' + ' plants'+ 'PGPR'	Google scholar	Salicylic acid-mediated enhancement of resistance in tomato plants against Xanthomonas perforans	Srinivasa et al., 2022	Introduction: Bacterial spot disease of tomato was identified a few decades ago. The varying point of entry for the pathogen has enhanced the complexities for designing an effective disease management method. Recent advances in the use of inducers to elicit immune response in order to prepare the plant for a future attack by the pathogen are similar to the vaccination that is undertaken in humans…	rejected	Biotic stress
APX' + 'gene express'+ 'abiotic stress' + ' plants'+ 'PGPR'	Google scholar	A Growth-Promoting Bacteria, Paenibacillus yonginensis DCY84T Enhanced Salt Stress Tolerance by Activating Defense-Related Systems in Panax ginseng	Sukweenadhi et al., 2018	Panax ginseng (C.A. Mayer) is a well-known medicinal plant used in traditional medicine in Korea that experiences serious salinity stress related to weather changes or incorrect fertilizer application. In ginseng, the use of Paenibacillus yonginensis DCY84T to improve salt stress tolerance has not been thoroughly explored. Therefore, we studied the role of P. yonginensis DCY84T under short-term a…	Rejected	No drought stress
APX' + 'gene express'+ 'abiotic stress' + ' plants'+ 'PGPR'	Google scholar	Piriformospora indica confers drought tolerance in Chinese cabbage leaves by stimulating antioxidant enzymes, the expression of drought-related genes and the plastid-localized CAS protein	Sun et al., 2010	Piriformospora indica, a root-colonizing endophytic fungus of Sebacinales, promotes plant growth and confers resistance against biotic and abiotic stress. The fungus strongly colonizes the roots of Chinese cab- bage, promotes root and shoot growth, and promotes lateral root formation. When colonized plants were exposed to polyethylene glycol to mimic drought stress, the activities of peroxidases,…	rejected	Fungi
APX' + 'gene express'+ 'abiotic stress' + ' plants'+ 'PGPR'	Google scholar	Nano-ZnO-Induced Drought Tolerance Is Associated with Melatonin Synthesis and Metabolism in Maize	Sun et al., 2020	The applications of ZnO nanoparticles in agriculture have largely contributed to crop growth regulation, quality enhancement, and induction of stress tolerance, while the underlying mechanisms remain elusive. Herein, the involvement of melatonin synthesis and metabolism in the process of nano-ZnO induced drought tolerance was investigated in maize. Drought stress resulted in the changes of subcel…	Rejected	No PGPR
APX' + 'gene express'+ 'abiotic stress' + ' plants'+ 'PGPR'	Google scholar	Phytohormone Priming: Regulator for Heavy Metal Stress in Plants	Sytar et al., 2019	Phytohormones act as chemical messengers and, under a complex regulation, allow plants to sustain biotic and abiotic stresses. Thus, phytohormones are known for their regulatory role in plant growth and development. Heavy metals (HMs) play an important role in metabolism and have roles in plant growth and development as micronutrients. However, at a level above threshold, these HMs act as contami…	Rejected	Review
APX' + 'gene express'+ 'abiotic stress' + ' plants'+ 'PGPR'	Google scholar	Assessing the Potential Role of Compost, PGPR, and AMF in Improving Tomato Plant Growth, Yield, Fruit Quality, and Water Stress Tolerance	Tahiri et al., 2022	Among abiotic stresses, drought is considered the most important growth-limiting factor, particularly in arid and semiarid regions. Therefore, new management strategies are needed to resolve and mitigate these negative consequences, improve soil quality and plant growth, and rationalize water use. In this context, we investigated the role of beneficial plant growth–pro- moting rhizobacteria (PGPR…	Rejected	No APX
APX' + 'gene express'+ 'abiotic stress' + ' plants'+ 'PGPR'	Google scholar	Isolation, promoter analysis and expression profile of Dreb2 in response to drought stress in wheat ancestors	Tavakol et al., 2014	Drought is one of the most important abiotic stresses, constraining crop production seriously. The dehydration responsive element binding proteins (DREBs) are important plant-specific transcription factors that respond to various abiotic stresses and consequently induce abiotic stress-related genes that impart stress endurance in plants. Wild species are naturally exposed to various abiotic stres…	Rejected	No PGPR
APX' + 'gene express'+ 'abiotic stress' + ' plants'+ 'PGPR'	Google scholar	Improved salinity tolerance of Medicago sativa and soil enzyme activities by PGPR	Tirry et al., 2021	Abiotic stresses such as salinity are common adverse conditions that significantly affect agricultural productivity worldwide. This study aimed to select halotolerant plant-growth-promoting rhizobacteria (PGPR) capable to promote plant growth and to improve soil functioning under salinity stress conditions. Thirty-two bacterial isolates were studied for their PGP traits and NaCl resistance. Four …	Rejected	Proteomic study
APX' + 'gene express'+ 'abiotic stress' + ' plants'+ 'PGPR'	Google scholar	Stenotrophomonas sp. SRS1 promotes growth of Arabidopsis and tomato plants under salt stress conditions	Tuong et al., 2022	Aims Plant Growth-Promoting Rhizobacteria (PGPR) support plant growth by alleviating plant stresses, among which those triggered by saline soils. We isolated Stenotrophomonas sp. SRS1 from salt-resistant Carex distans (distant sedge) roots to understand how this growth promotion was enabled and whether an active contribution of the bacteria and/or plant was required. Methods Various growth assays…	Rejected	No APX
APX' + 'gene express'+ 'abiotic stress' + ' plants'+ 'PGPR'	Google scholar	Role of Endophytes in Abiotic Stress Tolerance: With Special Emphasis on Serendipita indica	Tyagi et al., 2022	Abiotic stresses in soil occur due to high salinity, temperature, drought, heavy metals, and nutrients inhibit the functions of plants and cause a reduction in crop productivity. The common methods of increasing biomass production in agriculture do not align with sustainability. It involves the overuse of chemicals that curb soil fertility and possess many threats to the ecosystem. It is importan…	Rejected	Review
APX' + 'gene express'+ 'abiotic stress' + ' plants'+ 'PGPR'	Google scholar	Impact of Native ST-PGPR (Bacillus pumilus; EU927414) on PGP Traits, Antioxidants Activities, Wheat Plant Growth and Yield under Salinity	Upadhyay et al., 2019	The rhizobacterial isolate ‘121’ identified as Bacillus pumilus - EU927414, which was a rich source of PGP traits like IAA, gibberellins, phosphate solubilisers and siderophore production at 8% NaCl (w/v). This isolate showed synergistic behaviour of PGP traits with its compatible ST-PGPRs like three-fold increases in IAA content in T9 combination (EU927414 - B. pumilus + EU927408 - B. aquimaris …	Rejected	Proteomic study
APX' + 'gene express'+ 'abiotic stress' + ' plants'+ 'PGPR'	Google scholar	Drought tolerance induction and growth promotion by indole acetic acid producing Pseudomonas aeruginosa in Vigna radiata	Uzma et al., 2022	Drought accompanied with reduced precipitation is one of the key manacles to global agri- cultural throughput and is expected to escalate further hence posing major challenges to future food safety. For a sustainable agricultural environment, drought resistant plant growth promoting rhizobacteria (PGPR) are new encouraging prospect, which are inexpensive and have no side effects, as those of synt…	Rejected	Proteomic study
APX' + 'gene express'+ 'abiotic stress' + ' plants'+ 'PGPR'	Google scholar	Advances in Plant Microbiome and Sustainable Agriculture Functional Annotation and Future Challenges	Verma et al., 2020		Rejected	Book
APX' + 'gene express'+ 'abiotic stress' + ' plants'+ 'PGPR'	Google scholar	The Increase in Adaptive Capacity to High Illumination of Barley Plants Colonized by Rhizobacteria P. putida BS3701	Vetoshkina et al., 2018	The effect of the colonization of barley plants (Hordeum vulgare L.) by the associative microor- ganisms Pseudomonas putida BS3701 on the adaptation of the photosynthetic apparatus to high light inten- sity was studied. A number of differences were found in the functioning and structure of the photosynthetic apparatus of the control plants and plants colonized by P. putida BS3701 grown at 100 μmo…	Rejected	No abiotic stress
APX' + 'gene express'+ 'abiotic stress' + ' plants'+ 'PGPR'	Google scholar	Silicon and plant growth promoting rhizobacteria differentially regulate AgNP-induced toxicity in Brassica juncea: Implication of nitric oxide	Vishwakarma et al., 2020	An emerging stress of nanomaterials in soil and water is of great concern as it limits crop productivity and affects humans as well. Therefore, it is required to manage this problem. Silicon and plant growth promoting rhizo- bacteria has gained the engaging role in agriculture as (bio-)fertilizers. However, their role against silver na- noparticles (AgNPs) is still not known. Hence, present study…	Rejected	No abiotic stress
APX' + 'gene express'+ 'abiotic stress' + ' plants'+ 'PGPR'	Google scholar	Root Involvement in Plant Responses to Adverse Environmental Conditions	Vives-Peris et al., 2020	Climate change is altering the environment in which plants grow and survive. An increase in worldwide Earth surface temperatures has been already observed, together with an increase in the intensity of other abiotic stress conditions such as water deficit, high salinity, heavy metal intoxication, etc., generating harmful conditions that destabilize agricultural systems. Stress conditions deeply a…	Rejected	Review
APX' + 'gene express'+ 'abiotic stress' + ' plants'+ 'PGPR'	Google scholar	The Role of Plant Growth-Promoting Rhizobacteria (PGPR) in Mitigating Plant’s Environmental Stresses	Vocciante et al., 2022	Phytoremediation is a cost-effective and sustainable technology used to clean up pollutants from soils and waters through the use of plant species. Indeed, plants are naturally capable of absorb- ing metals and degrading organic molecules. However, in several cases, the presence of contaminants causes plant suffering and limited growth. In such situations, thanks to the production of specific roo…	Rejected	Review
APX' + 'gene express'+ 'abiotic stress' + ' plants'+ 'PGPR'	Google scholar	Comparative Physiological, Biochemical, and Genetic Responses to Prolonged Waterlogging Stress in Okra and Maize Given Exogenous Ethylene Priming	Vwioko et al., 2017	Waterlogging is an environmental challenge affecting crops worldwide. Ethylene induces the expression of genes linked to important agronomic traits under waterlogged conditions. The ability of okra (Abelmoschus esculentus L. Moench.) and maize (Zea mays L.) given exogenous ethylene priming to tolerate prolonged waterlogged conditions was investigated in this study. The investigation was carried o…	Rejected	No PGPR
APX' + 'gene express'+ 'abiotic stress' + ' plants'+ 'PGPR'	Google scholar	Enhancing Wheat Production Under Arid Climate Stresses Using Bio-Elicitors	Wafaa et al., 2017	Arid climate has contributed to crops yield production decrement in many regions due to water shortage and soil salinization. The main target of this research is to enhance wheat production under arid cli- mate stresses by utilizing bio-elicitors. Two common wheat assortments i.e. cv. Gemmiza 10 and Sakha 93 accom- plished tolerant to these stresses utilizing bio elicitors include Acremonium coen…	Rejected	No PGPR
APX' + 'gene express'+ 'abiotic stress' + ' plants'+ 'PGPR'	Google scholar	TaWRKY40 transcription factor positively regulate the expression of TaGAPC1 to enhance drought tolerance	Zhang et al., 2019	Backgrounds: Drought stress is one of the major factors that affects wheat yield. Glyceraldehyde-3-Phosphate dehydrogenase (GAPDH) is a multifunctional enzyme that plays the important role in abiotic stress and plant development. However, in wheat, limited information about drought-responsive GAPC genes has been reported, and the mechanism underlying the regulation of the GAPC protein is unknown.…	Rejected	No PGPR
APX' + 'gene express'+ 'abiotic stress' + ' plants'+ 'PGPR'	Google scholar	Comparison of morphological, physiological, and related-gene expression responses to saline-alkali stress in eight apple rootstock genotypes	Zhang et al., 2022	Grafting cultivars onto rootstocks capable of high saline-alkalinization tolerance is a promising way to improve apple production under specific regions with saline-alkali stress. The morphological, physiological, and related- gene expression responses of eight apple rootstock genotypes, including ‘Zumi’, ‘Marubakaido’, ‘Qingzhen 1’, ‘SH.6’, ‘M.26’, ‘B.9’, ‘M.9-T337’ and ‘Mark 9’, to saline-alkal…	Rejected	No PGPR
APX' + 'gene express'+ 'abiotic stress' + ' plants'+ 'PGPR'	Google scholar	Transcriptome analysis of maize inbred lines differing in drought tolerance provides novel insights into the molecular mechanisms of drought responses in roots	Zheng et al., 2020	Maize (Zea mays) is an important food and forage crop, as well as an industrial raw material, that plays im- portant roles in agriculture and national economies. Drought stress has negative effects on seed germination and seedling growth, and it decreases crop production. In this study, we selected two maize inbred lines with dif- ferent drought-tolerance levels: drought-tolerant 287M and drought…	Rejected	No PGPR
APX' + 'gene express'+ 'abiotic stress' + ' plants'+ 'PGPR'	Google scholar	Cold response and tolerance in cereal roots	Zhou et al., 2021	Cold stress adversely affects plant growth and is a limiting factor in crop productivity. Temperature volatility as a con- sequence of climate change will increase the effects of cold stress on crop cultivation. Low temperatures frequently occur early after planting in temperate climates, and severely affect root development in cereals. In this review, we address the question of how cereal root s…	Rejected	Review
APX' + 'gene express'+ 'drought stress' + ' plants'+ 'PGPR'	Google scholar	Isolation and characterization of plant growth-promoting rhizobacteria and their effects on the growth of Medicago sativa L. under salinity conditions	Zhu et al., 2020	Plant growth-promoting rhizobacteria are a group of free-living bacteria that colonize plant rhizosphere and benefit plant root growth, thereby increasing host plant to cope with salinity induced stress. The aim of this study was to (1) isolate and characterize auxin-producing bacteria showing a high plant growth-promoting (PGP) potential, and (2) evaluate the PGP effects on the growth of Medicag…	Rejected	No APX
APX' + 'gene express'+ 'drought stress' + ' plants'+ 'PGPR'	Google scholar	Recent Advances in Understanding Mechanisms of Plant Tolerance and Response to Aluminum Toxicity	Wei et al., 2021	Aluminum (Al) toxicity is a major environmental stress that inhibits plant growth and development. There has been impressive progress in recent years that has greatly increased our understanding of the nature of Al toxicity and its mechanisms of tolerance. This review describes the transcription factors (TFs) and plant hormones involved in the adaptation to Al stress. In particular, it discusses …	Rejected	Review
APX' + 'gene express'+ 'drought stress' + ' plants'+ 'PGPR'	Google scholar	Inoculation with Rhizobacteria Enhanced Tolerance of Tomato (Solanum lycopersicum L.) Plants in Response to Cadmium Stress	Wei et al., 2022	In this study, cadmium (Cd)-tolerant bacteria Serratia sp. D23 (D23) and Sphingomonas sp. D36 (D36) were isolated from Cd-contaminated rhizospheric soil. Both strains have indole-3-acetic acid production, phosphate solubilization and sidero- phores production ability. A hydroponic experiment was performed to evaluate the effect of D23 and D36 on Cd toxicity and Cd content in tomato plants. The re…	Rejected	Proteomic study
APX' + 'gene express'+ 'drought stress' + ' plants'+ 'PGPR'	Google scholar	Melatonin: Biosynthesis, content, and function in horticultural plants and potential application	Wu et al., 2021	Derived from tryptophan, melatonin is a nontoxic indolic molecule that is widely identified in species ranging from bacteria to mammals. It plays vital roles in the circadian rhythm, antioxidant activity and immunological enhancement in animals and in photosynthesis, biomass production, osmoregulation during the response to abiotic and biotic stress in plants. Horticultural plants are consideredt…	Rejected	Review
APX' + 'gene express'+ 'drought stress' + ' plants'+ 'PGPR'	Google scholar	A Novel Gene SbSI-2 Encoding Nuclear Protein from a Halophyte Confers Abiotic Stress Tolerance in E. coli and Tobacco	Yadav et al., 2014	Salicornia brachiata is an extreme halophyte that grows luxuriantly in coastal marshes. Previously, we have reported isolation and characterization of ESTs from Salicornia with large number of novel/unknown salt-responsive gene sequences. In this study, we have selected a novel salt-inducible gene SbSI-2 (Salicornia brachiata salt-inducible-2) for functional characterization. Bioinformatics analy…	Rejected	No PGPR
APX' + 'gene express'+ 'drought stress' + ' plants'+ 'PGPR'	Google scholar	Ameliorating the Drought Stress for Wheat Growth through Application of ACC-Deaminase Containing Rhizobacteria along with Biogas Slurry	Yaseen et al., 2020	The temperature increase around the world is leading to generation of drought, which is a big threat to the productivity of crops. Abiotic stresses like drought increase the ethylene level in plants. In higher plants, 1-aminocyclopropane-1-carboxylate (ACC) is considered as the immediate precursor of ethylene biosynthesis. The application of ACC-deaminase (ACCD) possessing rhizobacteria could ame…	Rejected	No abiotic stress
APX' + 'gene express'+ 'drought stress' + ' plants'+ 'PGPR'	Google scholar	Combined application of zinc oxide nanoparticles and biofertilizer to induce salt resistance in safflower by regulating ion homeostasis and antioxidant defence responses	Yasmin et al., 2021	Salinity is a key devastating abiotic factor that hinders the development and yield of safflower. The sole and combined application of zinc oxide nanoparticles (ZnO-NPs) and a biofertilizer (BF) to improve salt tolerance in safflower has not been thoroughly explored. The response of safflower plants in a pot experiment to the foliar spray of ZnO-NPs alone and in combination with a BF was thus det…	Rejected	Proteomic study
APX' + 'gene express'+ 'drought stress' + ' plants'+ 'PGPR'	Google scholar	Exogenous Application of Alpha-Lipoic Acid Mitigates Salt-Induced Oxidative Damage in Sorghum Plants through Regulation Growth, Leaf Pigments, Ionic Homeostasis, Antioxidant Enzymes, and Expression of Salt Stress Responsive Genes	Youssef et al., 2021		Rejected	Duplicate
APX' + 'gene express'+ 'drought stress' + ' plants'+ 'PGPR'	Google scholar	Halotolerant Bacillus altitudinis WR10 improves salt tolerance in wheat via a multi-level mechanism	Yue et al., 2022	Soil salinity is an important abiotic stress factor that seriously affects the crop growth and yield. Use of plant-derived microorganisms is a promising strategy to alleviate salt stress. In a previous study, the endophytic strain Bacillus altitudinis WR10 isolated from wheat roots showed high salt resistance. In this study, we investigated the efficacy of WR10 in improving the salt tolerance of …	Rejected	Proteomic study
APX' + 'gene express'+ 'drought stress' + ' plants'+ 'PGPR'	Google scholar	Toward the mitigation of biotic and abiotic stresses through plant growth promoting rhizobacteria	Zahedi et al., 2021		Rejected	Chapter book
APX' + 'gene express'+ 'drought stress' + ' plants'+ 'PGPR'	Google scholar	Synergistic effects of plant defense elicitors and Trichoderma harzianum on enhanced induction of antioxidant defense system in tomato against Fusarium wilt disease	Zehra et al., 2017		Rejected	Duplicate
APX' + 'gene express'+ 'drought stress' + ' plants'+ 'PGPR'	Google scholar	Overexpression of NtabDOG1L promotes plant growth and enhances drought tolerance in Nicotiana tabacum	Zhang et al., 2019	Drought is one of the major environmental stresses limiting crop growth and production. It is very important to exploit and utilize drought-tolerance genes to improve crop drought-resistance. In this study, we identified two homoeologs of a Nicotiana tabacum (Ntab) DELAY OF GERMINATION (DOG) 1 like gene, named as NtabDOG1L-T and NtabDOG1L-S, respectively. The NtabDOG1L genes were preferentially e…	Rejected	No PGPR
apx AND gene AND expression AND drought AND stress AND plants AND pgpr	Scopus	Bacillus thuringiensis PM25 ameliorates oxidative damage of salinity stress in maize via regulating growth, leaf pigments, antioxidant defense system, and stress responsive gene expression	Ali et al., 2022		Rejected	Duplicate
apx AND gene AND expression AND drought AND stress AND plants AND pgpr	Scopus	Bacillus mycoides PM35 Reinforces Photosynthetic Efficiency, Antioxidant Defense, Expression of Stress-Responsive Genes, and Ameliorates the Effects of Salinity Stress in Maize	Ali et al., 2022		Rejected	Duplicate
apx AND gene AND expression AND drought AND stress AND plants AND pgpr	Scopus	Co-application of bio-fertilizer and salicylic acid improves growth, photosynthetic pigments and stress tolerance in wheat under drought stress	Azmat et al., 2020	Drought stress hampers the growth and productivity of wheat crop worldwide. Thus far, different strategies have been proposed to improve drought tolerance in wheat but the combined application of plant growth-promoting rhizobacteria formulated bio-fertilizer (BF) and salicylic acid (SA) has not been thoroughly explored yet. Therefore, a pot experiment was conducted to observe the effect of SA, BF…	Rejected	Proteomic study
apx AND gene AND expression AND drought AND stress AND plants AND pgpr	Scopus	Streptomyces alleviate drought stress in tomato plants and modulate the expression of transcription factors ERF1 and WRKY70 genes	Abbasi et al., 2020		Rejected	Duplicate
apx AND gene AND expression AND drought AND stress AND plants AND pgpr	Scopus	Serratia liquefaciens KM4 Improves Salt Stress Tolerance in Maize by Regulating Redox Potential, Ion Homeostasis, Leaf Gas Exchange and Stress-Related Gene Expression	El-Esaw et al., 2018		Rejected	Duplicate
apx AND gene AND expression AND drought AND stress AND plants AND pgpr	Scopus	Bacillus firmus (SW5) augments salt tolerance in soybean (Glycine max L.) by T modulating root system architecture, antioxidant defense systems and stress- responsive genes expression	El-Esawi et al., 2018		Rejected	Duplicate
apx AND gene AND expression AND drought AND stress AND plants AND pgpr	Scopus	Pseudomonas putida attunes morphophysiological, biochemical and molecular responses in Cicer arietinum L. during drought stress and recovery	Tiwari et al., 2016		Rejected	Duplicate
