# Supplementary material for: Meta-analysis of plant growth-promoting rhizobacteria interaction with host plants: implications for drought stress response gene expression
Source: Front Plant Sci. 2024 Jan 15;14:1282553. doi: 10.3389/fpls.2023.1282553 (PMC10823023; doi:10.3389/fpls.2023.1282553)
Supplement: Supplementary file 18 [file Table_3.xlsx]

## Sheet: Foglio1
Keywords	Source	Title	Author	Abstract	Accepted/Rejected	Reason
ERD15' + 'gene expression'+ 'drought stress' + ' plants'+ 'PGPR'	Google scholar	The Plant-Growth-Promoting Rhizobacterium Paenibacillus polymyxa Induces Changes in Arabidopsis thaliana Gene Expression: A Possible Connection Between Biotic and Abiotic Stress Responses	Timmusk et al., 1999	This paper addresses changes in plant gene expression induced by inoculation with plant-growth-promoting rhizo- bacteria (PGPR). A gnotobiotic system was established with Arabidopsis thaliana as model plant, and isolates of Paenibacillus polymyxa as PGPR. Subsequent challenge by either the pathogen Erwinia carotovora (biotic stress) or induction of drought (abiotic stress) indicated that inocu- l…	Accepted
ERD15' + 'gene expression'+ 'drought stress' + ' plants'+ 'PGPR'	Google scholar	Plant–rhizobacteria interactions alleviate abiotic stress conditions	Dimkpa et al., 2009	Root-colonizing non-pathogenic bacteria can increase plant resistance to biotic and abiotic stress factors. Bacterial inoculates have been applied as biofertilizers and can increase the effectiveness of phytoremediation. Inoculating plants with non-pathogenic bacteria can provide ‘bioprotec- tion’ against biotic stresses, and some root-colonizing bacteria increase tolerance against abiotic stress…	Rejected	Review
ERD15' + 'gene expression'+ 'drought stress' + ' plants'+ 'PGPR'	Google scholar	Rhizosphere bacteria help plants tolerate abiotic stress	Yang et al., 2009	Plant-growth-promoting rhizobacteria (PGPR) are associated with plant roots and augment plant pro- ductivity and immunity; however, recent work by several groups shows that PGPR also elicit so-called ‘induced systemic tolerance’ to salt and drought. As we discuss here, PGPR might also increase nutrient uptake from soils, thus reducing the need for fertilizers and preventing the accumulation of ni…	Rejected	Review
ERD15' + 'gene expression'+ 'drought stress' + ' plants'+ 'PGPR'	Google scholar	Potential role of phytohormones and plant growth-promoting rhizobacteria in abiotic stresses: consequences for changing environment	Fahad et al., 2015	Plants are sessile beings, so the need of mechanisms to flee from unfavorable circumstances has provided the development of unique and sophisticated responses to environmental stresses. Depending on the degree of plasticity, many morphological, cellular, anatomical, and physiological changes occur in plants in response to abiotic stress. Phytohormones are small molecules that play critical roles …	Rejected	Review
ERD15' + 'gene expression'+ 'drought stress' + ' plants'+ 'PGPR'	Google scholar	Rhizobacterial-plant interactions: Strategies ensuring plant growth promotion under drought and salinity stress	Kaushal et al., 2016	Drought and salinity are major environmental stresses resulting in secondary stresses such as osmotic and oxidative stress (common to both stresses) as well as ionic stress (during salinity) causing alterations in physiological, biochemical and molecular processes in plants resulting in substantial loss to crop productivity. The major physiological parameters studied in plants during stressed con…	Rejected	Review
ERD15' + 'gene expression'+ 'drought stress' + ' plants'+ 'PGPR'	Google scholar	Communication of plants with microbial world: Exploring the regulatory networks for PGPR mediated defense signaling	Bukhat et al., 2020	Agricultural manipulation of potentially beneficial rhizosphere microbes is increasing rapidly due to their multi- functional plant-protective and growth related benefits. Plant growth promoting rhizobacteria (PGPR) are mostly non-pathogenic microbes which exert direct benefits on plants while there are rhizosphere bacteria which indirectly help plant by ameliorating the biotic and/or abiotic str…	Rejected	Review
ERD15' + 'gene expression'+ 'drought stress' + ' plants'+ 'PGPR'	Google scholar	Role of microorganisms in adaptation of agriculture crops to abiotic stresses	Grover et al., 2011	Increased incidences of abiotic and biotic stresses impacting productivity in principal crops are being witnessed all over the world. Extreme events like prolonged droughts, intense rains and flooding, heat waves and frost damages are likely to further increase in future due to climate change. A wide range of adaptations and mitigation strategies are required to cope with such impacts. Efficient …	Rejected	Review
ERD15' + 'gene expression'+ 'drought stress' + ' plants'+ 'PGPR'	Google scholar	Effect of plant growth promoting Pseudomonas spp. on compatible solutes, antioxidant status and plant growth of maize under drought stress	Sandhya et al., 2010	Drought is one of the major abiotic stresses affecting yield of dryland crops. Rhizobacterial populations of stressed soils are adapted and tolerant to stress and can be screened for isolation of efficient stress adaptive/tolerant, plant growth promoting rhizobacterial (PGPR) strains that can be used as inoculants for crops grown in stressed ecosystems. The effect of inoculation of five drought t…	Rejected	No ERD15
ERD15' + 'gene expression'+ 'drought stress' + ' plants'+ 'PGPR'	Google scholar	Effects of plant growth-promoting rhizobacteria on the molecular responses of maize under drought and heat stresses: A review	Notununu et al., 2021	Drought and heat are major environmental stresses that continually influence plant growth and development. Under field conditions, these stresses occur more frequently in combination than alone, which magnifies corresponding detrimental effects on the growth and productivity of agriculturally important crops. Plant responses to such abiotic stresses are quite complex and manifested in a range of …	Rejected	Review
ERD15' + 'gene expression'+ 'drought stress' + ' plants'+ 'PGPR'	Google scholar	Microorganisms in Plant Growth and Development: Roles in Abiotic Stress Tolerance and Secondary Metabolites Secretion	Koza et al., 2022	Crops aimed at feeding an exponentially growing population are often exposed to a variety of harsh environmental factors. Although plants have evolved ways of adjusting their metabolism and some have also been engineered to tolerate stressful environments, there is still a shortage of food supply. An alternative approach is to explore the possibility of using rhizosphere microorganisms in the mit…	Rejected	Review
ERD15' + 'gene expression'+ 'drought stress' + ' plants'+ 'PGPR'	Google scholar	Enhancement of drought stress tolerance in crops by plant growth promoting rhizobacteria	Vurukonda et al., 2016	Drought is one of the major constraints on agricultural productivity worldwide and is likely to further increase. Several adaptations and mitigation strategies are required to cope with drought stress. Plant growth promoting rhizobacteria (PGPR) could play a significant role in alleviation of drought stress in plants. These beneficial microorganisms colonize the rhizosphere/endo-rhizosphere of pl…	Rejected	Review
ERD15' + 'gene expression'+ 'drought stress' + ' plants'+ 'PGPR'	Google scholar	Changes in Gene Expression in Canola Roots Induced by ACC-Deaminase-Containing Plant-Growth-Promoting Bacteria	Hontzeas et al., 2004	The technique of RNA arbitrarily primed-polymerase chain reaction (RAP-PCR) was used to study changes in gene expression over time in canola roots treated with the 1-aminocyclopropane-1-carboxylate (ACC) deaminase-con- taining plant-growth-promoting bacterium Enterobacter cloacae UW4 and to compare the changes with those in a mutant of E. cloacae UW4 in which the ACC deaminase structural gene acd…	Rejected	No ERD15
ERD15' + 'gene expression'+ 'drought stress' + ' plants'+ 'PGPR'	Google scholar	Drought-tolerant plant growth promoting Bacillus spp.: effect on growth, osmolytes, and antioxidant status of maize under drought stress	Vardharajula et al. 2011	InpresentstudyBacillusspp.screenedfordroughttolerancecouldtolerateminimalwaterpotential(􏰨0.73MPa) were evaluated for plant growth promoting properties at 􏰨0.73 MPa. Drought stress affected growth of isolates as indicated by increased intracellular free amino acids, proline, total soluble sugars, and exopolysaccharides. Drought-tolerantBacillusspp.HYD-B17,HYTAPB18,HYDGRFB19,BKB30,RMPB44identifieda…	Rejected	No ERD15
ERD15' + 'gene expression'+ 'drought stress' + ' plants'+ 'PGPR'	Google scholar	Molecular mechanisms in plant growth promoting bacteria (PGPR) to resist environmental stress in plants	Vandana et al., 2018		Rejected	Chapter book
ERD15' + 'gene expression'+ 'drought stress' + ' plants'+ 'PGPR'	Google scholar	Microbes in Cahoots with Plants: MIST to Hit the Jackpot of Agricultural Productivity during Drought	Kaushal et al., 2019	Drought conditions marked by water deficit impede plant growth thus causing recurrent decline in agricultural productivity. Presently, research efforts are focussed towards harnessing the potential of microbes to enhance crop production during drought. Microbial communities, such as arbuscular mycorrhizal fungi (AMF) and plant growth-promoting rhizobacteria (PGPR) buddy up with plants to boost cr…	Rejected	Review
ERD15' + 'gene expression'+ 'drought stress' + ' plants'+ 'PGPR'	Google scholar	In Vitro Screening for Abiotic Stress Tolerance in Potent Biocontrol and Plant Growth Promoting Strains of Pseudomonas and Bacillus spp.	Kumar et al., 2014	Plant growth promoting rhizobacteria (PGPR) has been identified as a group of microbes that are used for plant growth enhancement and biocontrol for management of plant diseases. The inconsistency in performance of these bacteria from laboratory to field conditions is compounded due to the prevailing abiotic stresses in the field. Therefore, selection of bacterial strains with tolerance to abioti…	Rejected	No ERD15
ERD15' + 'gene expression'+ 'drought stress' + ' plants'+ 'PGPR'	Google scholar	Rhizosphere Biology: Interactions Between Microbes and Plants	Sharma et al., 2021		Rejected	Book
ERD15' + 'gene expression'+ 'drought stress' + ' plants'+ 'PGPR'	Google scholar	Bacterial-mediated drought tolerance: Current and future prospect	Ngumbi et al., 2016	With ongoing climate change, the severity, frequency and duration of drought in cotton (Gossypium hirsutum L.), soybean (Glycine max L.), and corn (Zea mays L.) producing areas around the world are predicted to increase. Plants’ tolerance to drought stress needs to be improved in order to allow growth of crops that satisfy food demands under limited water resource availability. Plant-associated m…	Rejected	Review
ERD15' + 'gene expression'+ 'drought stress' + ' plants'+ 'PGPR'	Google scholar	The Plant Healthy and Safety Guards Plant Growth Promoting Rhizo Bacteria (PGPR)	Guo et al., 2015		Rejected	Review
ERD15' + 'gene expression'+ 'drought stress' + ' plants'+ 'PGPR'	Google scholar	Agriculture biotechnology for management of multiple biotic and abiotic environmental stress in crops	Haggag et al., 2015	In current situation where dramatic changes in the environmental conditions are very common finding the alternate options in increasing crop productivity is main area that needs to be emphasized to feed the overwhelming populations and ensure their food security. Among environmental conditions like various biotic and abiotic stresses are playing major role in decreasing crop productivity. Abiotic…	Rejected	Review
ERD15' + 'gene expression'+ 'drought stress' + ' plants'+ 'PGPR'	Google scholar	Sustainable Agriculture in the Era of Climate Change	Kabiraj et al., 2016		Rejected	Book
ERD15' + 'gene expression'+ 'drought stress' + ' plants'+ 'PGPR'	Google scholar	Soil microbiomes vary in their ability to confer drought tolerance to Arabidopsis	Zolla et al., 2013	Drought is a major constraint on agricultural production. Crop genetic improvement for drought tolerance has received much attention and there is ample information about the ability of specific soil microbes to influence drought tolerance in plants. However, in nature, plants interact simultaneously with an array of beneficial, benign and pathogenic microbes. There is a need to understand the cum…	Rejected	Review
ERD15' + 'gene expression'+ 'drought stress' + ' plants'+ 'PGPR'	Google scholar	Alleviation of Salt Stress by Enterobacter sp. EJ01 in Tomato and Arabidopsis Is Accompanied by Up-Regulation of Conserved Salinity Responsive Factors in Plants	Kim et al., 2014	Microbiota in the niches of the rhizosphere zones can af- fect plant growth and responses to environmental stress conditions via mutualistic interactions with host plants. Specifically, some beneficial bacteria, collectively referred to as Plant Growth Promoting Rhizobacteria (PGPRs), in- crease plant biomass and innate immunity potential. Here, we report that Enterobacter sp. EJ01, a bacterium i…	Rejected	No ERD15
ERD15' + 'gene expression'+ 'drought stress' + ' plants'+ 'PGPR'	Google scholar	Water Conservation and Plant Survival Strategies of Rhizobacteria under Drought Stress	Khan et al., 2020	Drylands are stressful environment for plants growth and production. Plant growth-promoting rhizobacteria (PGPR) acts as a rampart against the adverse impacts of drought stress in drylands and enhances plant growth and is helpful in agricultural sustainability. PGPR improves drought tolerance by implicating physio-chemical modifications called rhizobacterial-induced drought endurance and resilien…	Rejected	Review
ERD15' + 'gene expression'+ 'drought stress' + ' plants'+ 'PGPR'	Google scholar	Building the crops of tomorrow: advantages of symbiont-based approaches to improving abiotic stress tolerance	Coleman-Derr et al., 2014	The exponential growth in world population is feeding a steadily increasing global need for arable farmland, a resource that is already in high demand. This trend has led to increased farming on subprime arid and semi-arid lands, where limited availability of water and a host of environmental stresses often severely reduce crop productivity. The conventional approach to mitigating the abiotic str…	Rejected	Review
ERD15' + 'gene expression'+ 'drought stress' + ' plants'+ 'PGPR'	Google scholar	Effects of ACC deaminase containing rhizobacteria on plant growth and expression of Toc GTPases in tomato (Solanum lycopersicum) under salt stress	Yan et al., 2014	The bacterial enzyme 1-aminocyclopropane-1-carboxylate (ACC) deaminase plays a key role in lowering plant stress ethylene levels, thereby stimulating plant growth. The present study aims to evaluate whether the ACC deaminase producing plant growth promoting rhizobacterium (PGPR) Pseudomonas putida UW4 can maintain and promote plant growth in saline environments and modulate the expression of chlo…	Rejected	No ERD15
ERD15' + 'gene expression'+ 'drought stress' + ' plants'+ 'PGPR'	Google scholar	CaDHN5, a Dehydrin Gene from Pepper, Plays an Important Role in Salt and Osmotic Stress Responses	Luo et al., 2019	Dehydrins (DHNs), as a sub-family of group two late embryogenesis-abundant (LEA) proteins, have attracted considerable interest owing to their functions in enhancing abiotic stress tolerance in plants. Our previous study showed that the expression of CaDHN5 (a dehydrin gene from pepper) is strongly induced by salt and osmotic stresses, but its function was not clear. To understand the function of…	Accepted
ERD15' + 'gene expression'+ 'drought stress' + ' plants'+ 'PGPR'	Google scholar	Plant-growth-promoting rhizobacteria: drought stress alleviators to ameliorate crop production in drylands	Kaushal et al., 2016	Drylands are known for being a drought stressed environment, which is an alarming constraint to crop produc- tivity. To rescue plant growth in such stressful conditions, plant-growth-promoting rhizobacteria (PGPR) are a bulwark against drought stress and imperilled sustainability of agricul- ture in drylands. PGPR mitigates the impact of drought stress on plants through a process called rhizobact…	Rejected	Review
ERD15' + 'gene expression'+ 'drought stress' + ' plants'+ 'PGPR'	Google scholar	Antioxidants in Plant-Microbe Interaction	Singh et al., 2019		Rejected	Book
ERD15' + 'gene expression'+ 'drought stress' + ' plants'+ 'PGPR'	Google scholar	Cytokinin-producing, plant growth-promoting rhizobacteria that confer resistance to drought stress in Platycladus orientalis container seedlings	Liu et al., 2013	One of the proposed mechanisms through which plant growth-promoting rhizobacteria (PGPR) enhance plant growth is the production of plant growth regulators, especially cytokinin. However, little information is available regarding cytokinin-producing PGPR inoculation on growth and water stress consistence of forest container seedlings under drought condition. This study determined the effects of Ba…	Rejected	No ERD15
ERD15' + 'gene expression'+ 'drought stress' + ' plants'+ 'PGPR'	Google scholar	Rhizomicrobiome – A Biological Software to Augment Soil Fertility and Plant Induced Systemic Tolerance Under Abiotic Stress	Jegan et al., 2016		Rejected	Chapter book
ERD15' + 'gene expression'+ 'drought stress' + ' plants'+ 'PGPR'	Google scholar	Mitsuaria sp. and Burkholderia sp. from Arabidopsis rhizosphere enhance drought tolerance in Arabidopsis thaliana and maize (Zea mays L.)	Huang et al., 2017	Background and aims Some rhizosphere microbes, such as plant growth-promoting rhizobacteria (PGPR), can alleviate plant drought stress and improve water use effi- ciency and productivity under drought conditions. The aims of this study are: 1) isolation and characterization of PGPRs from the rhizosphere of Arabidopsis plants that could improve drought tolerance of Arabidopsis and maize; 2) studyi…	Rejected	No ERD15
ERD15' + 'gene expression'+ 'drought stress' + ' plants'+ 'PGPR'	Google scholar	Induced drought tolerance through wild and mutant bacterial strain Pseudomonas simiae in mung bean (Vigna radiata L.)	Kumari et al., 2016	The present study focused on the overproduc- ing mutant of a plant growth promoting rhizobacterium (PGPR) Pseudomonas simiae strain AU (MTCC-12057) for significant drought tolerance in mung bean plants. Five mutants namely AU-M1, AU-M2, AU-M3, AU-M4 and AU-M5 were made after treatment of wild type strain with N-methyl-N-nitro-N-nitrosoguanidine. Mutant strain AU- M4 was recorded for enhanced ACC …	Rejected	No ERD15
ERD15' + 'gene expression'+ 'drought stress' + ' plants'+ 'PGPR'	Google scholar	Transcriptomic profiling of maize (Zea mays L.) seedlings in response to Pseudomonas putida stain FBKV2 inoculation under drought stress	SkZ et al, 2018	Several mechanisms have been proposed for plant growth-promoting rhizobacteria (PGPR)-mediated drought stress tolerance in plants, but little is known about the molecular pathways involved in the drought tolerance promoted by PGPR. We, therefore, aim to study the differential gene response between Pseudomonas putida strain FBKV2 and maize interaction under drought stress using Illumina sequencing…	Rejected	No ERD15
ERD15' + 'gene expression'+ 'drought stress' + ' plants'+ 'PGPR'	Google scholar	Bio-priming of seeds: Plant stress management and its underlying cellular, biochemical and molecular mechanisms	Chakraborti et al., 2022	Exposure of crops to stress is the most significant barrier to agricultural output and food security worldwide. Stress induces changes in plants’ physiological functions, which leads to lower plant growth and agricultural yield. Plants undergo a variety of molecular, cellular, and physiological changes to combat various abiotic stresses. Plants suffer from increased osmotic pressure outside the r…	Rejected	Review
ERD15' + 'gene expression'+ 'drought stress' + ' plants'+ 'PGPR'	Google scholar	Effect of osmotic stress on plant growth promoting Pseudomonas spp.	Sandhya et al., 2010	In this study we isolated and screened drought tolerant Pseudomonas isolates from arid and semi arid crop production systems of India. Five isolates could tolerate osmotic stress up to ¡0.73 MPa and possessed multiple PGP properties such as P-solubilization, production of phy- tohormones (IAA, GA and cytokinin), siderophores, ammonia and HCN however under osmotic stress expres- sion of PGP traits…	Rejected	No ERD15
ERD15' + 'gene expression'+ 'drought stress' + ' plants'+ 'PGPR'	Google scholar	Rhizobacteriome: Promising Candidate for Conferring Drought Tolerance in Crops	Yadav et al., 2020	Drought is a global water shortage problem which poses challenge to crop productivity. Novel strategies are being tried to find out solution to sustain agriculture under drought conditions. Rhizobacteriome is an exclusive genetic material of bacteria resident to rhizosphere plays critical role to health and yield of plant. The interaction of rhizobacteriome with plant provides basis for protectin…	Rejected	Review
ERD15' + 'gene expression'+ 'drought stress' + ' plants'+ 'PGPR'	Google scholar	Induction of Drought Tolerance in Cucumber Plants by a Consortium of Three Plant Growth-Promoting Rhizobacterium Strains	Wang et al., 2012	Our previous work showed that a consortium of three plant growth-promoting rhizobacterium (PGPR) strains (Bacillus cereus AR156, Bacillus subtilis SM21, and Serratia sp. XY21), termed as BBS for short, was a promising biocontrol agent. The present study investigated its effect on drought tolerance in cucumber plants. After withholding watering for 13 days, BBS- treated cucumber plants had much da…	Rejected	No ERD15
ERD15' + 'gene expression'+ 'drought stress' + ' plants'+ 'PGPR'	Google scholar	Plant growth-promoting bacteria confer resistance in tomato plants to salt stress	Mayak et al., 2004	The object of the work is to evaluate whether rhizobacteria populating dry salty environments can increase resistance in tomato to salt stress. Seven strains of plant growth-promoting bacteria that have 1-aminocyclopropane-1-carboxylate (ACC) deaminase activity were isolated from soil samples taken from the Arava region of southern Israel. Following growth of these seedlings in the presence of 43…	Rejected	No ERD15
ERD15' + 'gene expression'+ 'drought stress' + ' plants'+ 'PGPR'	Google scholar	Mitsuaria sp. and Burkholderia sp. from Arabidopsis rhizosphere enhance drought tolerance in Arabidopsis thaliana and maize (Zea mays L.)	Hong et al., 2017	Background and aims Some rhizosphere microbes, such as plant growth-promoting rhizobacteria (PGPR), can alleviate plant drought stress and improve water use effi- ciency and productivity under drought conditions. The aims of this study are: 1) isolation and characterization of PGPRs from the rhizosphere of Arabidopsis plants that could improve drought tolerance of Arabidopsis and maize; 2) studyi…	Rejected	No ERD15
ERD15' + 'gene expression'+ 'drought stress' + ' plants'+ 'PGPR'	Google scholar	Induction of moisture stress tolerance by Bacillus and Paenibacillus in pigeon pea (Cajanus cajan. L)	Devi et al., 2021	Drought stress is the main growth-limiting factor in pigeon pea production. Plant growth-promoting bacteria (PGPB) induce abiotic stress tolerance in several plants. However, the physiological and molecular changes with PGPB priming are not well understood in pigeon pea. The present study explored the potential of Firmibacteria (Bacillus azotoformans MTCC2953, Bacillus aryabhattai KSBN2K7, and Pa…	Rejected	No ERD15
ERD15' + 'gene expression'+ 'drought stress' + ' plants'+ 'PGPR'	Google scholar	Efforts towards overcoming drought stress in crops: Revisiting the mechanisms employed by plant growth-promoting bacteria	Fadiji et al., 2022	Globally, agriculture is under a lot of pressure due to rising population and corresponding increases in food demand. However, several variables, including improper mechanization, limited arable land, and the presence of several biotic and abiotic pressures, continually impact agricultural productivity. Drought is a notable destructive abiotic stress and may be the most serious challenge confront…	Rejected	Review
ERD15' + 'gene expression'+ 'drought stress' + ' plants'+ 'PGPR'	Google scholar	Antioxidant, physiological and biochemical responses of drought susceptible and drought tolerant mustard (Brassica juncea L) genotypes to rhizobacterial inoculation under water deficit stress	Bandeppa et al., 2019	Response of drought susceptible (DS) genotype Pusa Karishma LES-39 and drought tolerant (DT) mustard genotype NPJ-124, to rhizobacterial inoculation under water deficit stress, was compared in the present study to determine the influence of inoculants on biochemical and physiological attributes of these two different geno- types. Inoculation was observed to improve root and shoot dry weight in bo…	Rejected	No ERD15
ERD15' + 'gene expression'+ 'drought stress' + ' plants'+ 'PGPR'	Google scholar	BRADYRHIZOBIUM JAPONICUM IRAT FA3 INCREASES BIOMASS, YIELD AND DROUGHT TOLERANCE IN PLANTS	Gachomo et al., 2014	The effects of plant growth promoting rhizobacterium, Bradyrhizobium japonicum IRAT FA3 (PGPR) on non-leguminous model plants, maize (Zea mays) and Arabidopsis thaliana, were studied in this work for the first time. The impact of B. japonicum IRAT FA3 on plant growth development, biomass and yield were investigated using a nondestructive analytical method on root length and root hair formation, g…	Rejected	No ERD15
ERD15' + 'gene expression'+ 'drought stress' + ' plants'+ 'PGPR'	Google scholar	Azospirillum: benefits that go far beyond biological nitrogen fixation	Fukami et al., 2018	The genus Azospirillum comprises plant-growth-promoting bacteria (PGPB), which have been broadly studied. The benefits to plants by inoculation with Azospirillum have been primarily attributed to its capacity to fix atmospheric nitrogen, but also to its capacity to synthesize phytohormones, in particular indole-3-acetic acid. Recently, an increas- ing number of studies has attributed an important…	Rejected	Review
ERD15' + 'gene expression'+ 'drought stress' + ' plants'+ 'PGPR'	Google scholar	Introgression of SbERD4 Gene Encodes an Early-Responsive Dehydration-Stress Protein That Confers Tolerance against Different Types of Abiotic Stresses in Transgenic Tobacco	Jha et al., 2021	alicornia brachiata is an extreme halophyte that commonly grows on marsh conditions and is also considered a promising resource for drought and salt-responsive genes. To unveil a glimpse of stress endurance by plants, it is of the utmost importance to develop an understanding of stress tolerance mechanisms. ‘Early Responsive to Dehydration’ (ERD) genes are defined as a group of genes involved in …	Rejected	No PGPR
ERD15' + 'gene expression'+ 'drought stress' + ' plants'+ 'PGPR'	Google scholar	Biocontrol activity of Paenibacillus polymyxa AC-1 against Pseudomonas syringae and its interaction with Arabidopsis thaliana	Hong et al., 2016	Paenibacillus polymyxa AC-1 (AC-1) is a plant growth-promoting rhizobacterium (PGPR) that has been used as a soil inoculant for biocontrol of plant pathogenic fungi and to promote plant growth. In this study, we examine the effects of AC-1 on the bacterial phytopathogen Pseudomonas syringae and internal colonization of AC-1 by counting bacterial populations that colonize plants. AC-1 inhibited th…	Rejected	No ERD15
ERD15' + 'gene expression'+ 'drought stress' + ' plants'+ 'PGPR'	Google scholar	Plant Growth-Promoting Rhizobacteria Eliminate the Effect of Drought Stress in Plants: A Review	Ahmad et al., 2022	Plants evolve diverse mechanisms to eliminate the drastic effect of biotic and abiotic stresses. Drought is the most hazardous abiotic stress causing huge losses to crop yield worldwide. Osmotic stress decreases relative water and chlorophyll content and increases the accumulation of osmolytes, epicuticular wax content, antioxidant enzymatic activities, reactive oxygen species, secondary metaboli…	Rejected	Review
ERD15' + 'gene expression'+ 'drought stress' + ' plants'+ 'PGPR'	Google scholar	Pseudomonas sp. strain AKM-P6 enhances tolerance of sorghum seedlings to elevated temperatures	Sandhya et al., 2009	A thermotolerant strain AKM-P6 of Pseudomonas sp. possessing plant growth-promoting properties was isolated from rhizosphere of pigeon pea grown under semiarid conditions in India. The effect of inoculation with AKM-P6 on survival and growth of sorghum seedlings at elevated temperatures (ET) was investigated under sterile and nonsterile soil conditions. Inoculation with strain AKM- P6 helped sorg…	Rejected	No ERD15
ERD15' + 'gene expression'+ 'drought stress' + ' plants'+ 'PGPR'	Google scholar	Plant Growth Promoting Rhizobacteria (PGPR) mediated temperature, drought and pesticide stress tolerance of crop plants through multidisciplinary approach	Mishra et al., 2018	Root colonizing, beneficial, soil bacteria are usually referred to as PGPR, influences plant growth by various direct or indirect mechanisms. Global warming, drought and pesticide stress causes a major challenge to crop productivity. The present study is aimed to review the PGPR mediated temperature, drought and pesticide stress tolerance of crop plants, through application of potential PGPR. Rec…	Rejected	Review
ERD15' + 'gene expression'+ 'drought stress' + ' plants'+ 'PGPR'	Google scholar	Interkingdom signaling in plant-rhizomicrobiome interactions for sustainable agriculture	Phour et al., 2020	The rhizosphere is a complex ecosystem around plant roots that comprises an integrated network of plant roots, the microbiome and soil. Wide spread communication between prokaryotes and eukaryotes occurs within this integrated network via a complex set of signal molecules secreted during both beneficial and harmful in- teractions. Intra- and inter-species communication among microbes occurs throu…	Rejected	Review
ERD15' + 'gene expression'+ 'drought stress' + ' plants'+ 'PGPR'	Google scholar	Salt Stress, Microbes, and Plant Interactions: Mechanisms and Molecular Approaches Volume 2	Sekar et al., 2019		Rejected	Book
ERD15' + 'gene expression'+ 'drought stress' + ' plants'+ 'PGPR'	Google scholar	Screening and identification of abiotic stress-responsive efficient antifungal Pseudomonas spp. from rice rhizospheric soil	Karnwal et al., 2021	Plant growth-promoting rhizobacteria (PGPR) are a collection of microorganisms often used to support and promote plant development and combat plant infectious diseases with various biological control methods. The most significant restricting factors for agricultural productivity worldwide are abiotic constraints. In the present study, seven bacterial isolates from the rice rhizosphere were select…	Rejected	No ERD15
ERD15' + 'gene expression'+ 'drought stress' + ' plants'+ 'PGPR'	Google scholar	Delineation of mechanistic approaches employed by plant growth promoting microorganisms for improving drought stress tolerance in plants	Ali et al., 2021	Drought stress is expected to increase in intensity, frequency, and duration in many parts of the world, with potential negative impacts on plant growth and productivity. The plants have evolved complex physiological and biochemical mechanisms to respond and adjust to water-deficient environments. The physiological and biochemical mechanisms associated with water-stress tolerance and water-use ef…	Rejected	Review
ERD15' + 'gene expression'+ 'drought stress' + ' plants'+ 'PGPR'	Google scholar	Plant Biotic Interactions State of the Art	Kuppusamy et al., 2019		Rejected	Book
ERD15' + 'gene expression'+ 'drought stress' + ' plants'+ 'PGPR'	Google scholar	Plant growth-promoting bacteria that confer resistance to water stress in tomatoes and peppers	Mayak et al., 2004	The work reported here evaluates whether bacteria populating arid and salty environments can confer resistance in tomato and pepper plants to water stress. Plant growth-promoting bacteria that have ACC deaminase activity were isolated from soil samples taken from the Arava region of southern Israel. One of these strains, Achromobacter piechaudii ARV8 [Mayak et al., Plant growth-promoting bacteria…	Rejected	No ERD15
ERD15' + 'gene expression'+ 'drought stress' + ' plants'+ 'PGPR'	Google scholar	Plant Microbiomes for Sustainable Agriculture	Gontia-Mishra et al., 2015		Rejected	Book
ERD15' + 'gene expression'+ 'drought stress' + ' plants'+ 'PGPR'	Google scholar	Endophytic bacteria in sunflower (Helianthus annuus L.): isolation, characterization, and production of jasmonates and abscisic acid in culture medium	Forchetti et al., 2007.	This study was designed to isolate and characterize endophytic bacteria from sunflower (Helianthus annuus) grown under irrigation and water stress (drought) conditions, to analyze growth of isolated bacteria under drought condition, and to evaluate the ability of bacteria isolated from plants cultivated under drought to produce jasmonates (JAs) and abscisic acid (ABA). Bacteria were isolated from…	Rejected	No ERD15
ERD15' + 'gene expression'+ 'drought stress' + ' plants'+ 'PGPR'	Google scholar	Role of Microbial Communities to Mitigate Climate Change in Agriculture	Kumar et al., 2020	Global warming and climate change are the most prominent issues of the current environmental scenario. These problems arise due to a higher concentration of greenhouse gases in the atmosphere which exerts a warming effect. Although much attention has been given to anthropogenic sources and impacts of these gases, the significance and implications of microorganisms have remained neglected. The pre…	Rejected	Review
ERD15' + 'gene expression'+ 'drought stress' + ' plants'+ 'PGPR'	Google scholar	Microbiomes and the Global Climate Change	Zeyad et al., 2021		Rejected	Book
ERD15' + 'gene expression'+ 'drought stress' + ' plants'+ 'PGPR'	Google scholar	Brown biotechnology: a powerful toolbox for resolving current and future challenges in the development of arid lands	Rodríguez-Núñez et al., 2019	The aim of this study was to link the biotechnological advances made in arid lands, which are known as “brown bio- technology,” to the current environmental challenges facing these regions, their ecosystems and their inhabitants. We present a broad compilation of scientific evidence and technological advances developed over the past 15 years that have helped to address some of the classical const…	Rejected	Review
ERD15' + 'gene expression'+ 'drought stress' + ' plants'+ 'PGPR'	Google scholar	Drought Stress in Brassica napus: Effects, Tolerance Mechanisms, and Management Strategies	Batool et al., 2021	Drought poses serious threats to global crop production and its intensity is continuously soaring due to global warming. Brassica napus L. is an essential oilseed crop with an important place in global edible oil production. Drought-induced yield reduction is a big problem that needs to be addressed by knowing the targeted pathways and processes. Drought stress adversely affects germination, seed…	Rejected	Review
ERD15' + 'gene expression'+ 'drought stress' + ' plants'+ 'PGPR'	Google scholar	Probiotics for Plants: NO􏵍Producing Lactobacilli Protect Plants from Drought	Yarullina et al., 2014	After the inoculation of wheat roots with a suspension of the bacterium Lactobacillus plantarum, reduction or decrease of oxidative stress detected by the accumulation of H2O2 and MDA was found in leaves. Activation of catalase and increased integral antioxidant capacity in seedlings treated with NO􏵍producing lactobacilli were detected during the determination of the contribution of bacterial NO …	Rejected	No ERD15
ERD15' + 'gene expression'+ 'drought stress' + ' plants'+ 'PGPR'	Google scholar	Silica Particles Trigger the Exopolysaccharide Production of Harsh Environment Isolates of Growth-Promoting Rhizobacteria and Increase Their Ability to Enhance Wheat Biomass in Drought-Stressed Soils	Fetsiukh et al., 2021	In coming decades, drought is expected to expand globally owing to increased evaporation and reduced rainfall. Understanding, predicting, and controlling crop plants’ rhizosphere has the potential to manipulate its responses to environmental stress. Our plant growth-promoting rhizobacteria (PGPR) are isolated from a natural laboratory, ‘The Evolution Canyon’, Israel, (EC), from the wild progenito…	Rejected	No ERD15
ERD15' + 'gene expression'+ 'drought stress' + ' plants'+ 'PGPR'	Google scholar	Physiological response of North China red elder container seedlings to inoculation with plant growth-promoting rhizobacteria under drought stress	Liu et al., 2019	The issue of how to alleviate the negative effects imposed by water stress is an interesting problem. Plant growth-promoting rhizobacteria (PGPR) colonize the rhizosphere of plants and are known to promote the growth of crops. However, there are few studies characteriz- ing the physiological response of plants to drought stress after PGPR inoculation. The aim of this study was to investigate the …	Rejected	No ERD15
ERD15' + 'gene expression'+ 'drought stress' + ' plants'+ 'PGPR'	Google scholar	Morphological Analysis, Protein Profiling and Expression Analysis of Auxin Homeostasis Genes of Roots of Two Contrasting Cultivars of Rice Provide Inputs on Mechanisms Involved in Rice Adaptation towards Salinity Stress	Saini et al, 2021	Plants remodel their root architecture in response to a salinity stress stimulus. This process is regulated by an array of factors including phytohormones, particularly auxin. In the present study, in order to better understand the mechanisms involved in salinity stress adaptation in rice, we compared two contrasting rice cultivars—Luna Suvarna, a salt tolerant, and IR64, a salt sensitive cultiva…	Rejected	No ERD15
ERD15' + 'gene expression'+ 'drought stress' + ' plants'+ 'PGPR'	Google scholar	Emergent bacterial community properties induce enhanced drought tolerance in Arabidopsis	Yang et al., 2021	Drought severely restricts plant production and global warming is further increasing drought stress for crops. Much information reveals the ability of individual microbes affecting plant stress tolerance. However, the effects of emergent bacterial community properties on plant drought tolerance remain largely unexplored. Here, we inoculated Arabidopsis plants in vivo with a four-species bacterial…	Rejected	No ERD15
ERD15' + 'gene expression'+ 'drought stress' + ' plants'+ 'PGPR'	Google scholar	Evaluating the effect of Sphingobium yanoikuyae MH394206 and mixed consortia on growth of rice CO 51 in moisture deficit condition	Priya et al., 2020	A pot culture study was conducted to evaluate the effect of Sphingobium yanoikuyae MH394206 and mixed consortia on the growth of rice CO-51 in flooded and 75% moisture deficit condition. Along with S. yanoikuyae MH394206, other plant growth promoting bacteria like Azospillium brasilense, multi mineral solubilizing bacterial strain 1 and 2 were used as mixed consortia. Impact of these microorganis…	Rejected	No ERD15
ERD15' + 'gene expression'+ 'drought stress' + ' plants'+ 'PGPR'	Google scholar	Brave New Soil Science	Rao et al., 2015		Rejected	Review
ERD15' + 'gene expression'+ 'drought stress' + ' plants'+ 'PGPR'	Google scholar	Individual Effects of High Temperature and Tropospheric Ozone on Tomato: A Review	Gupta et al., 2022	Rising tropospheric ozone (O3) and temperature, the two most important stresses caused due to climate change. Both stresses have now become foremost concerns for production of tomato worldwide due to their role in immensely afflicting productiv- ity. These stresses have been found to occur concomitantly, and tomato is very sensitive to both heat stress and elevated O3. This paper reviews the indi…	Rejected	Review
ERD15' + 'gene expression'+ 'drought stress' + ' plants'+ 'PGPR'	Google scholar	Evaluation of Drought Resistance and Yield in PGPR-Primed Seeds of Festuca arundinacea Schreb under Different Levels of Osmotic Potential and Field Capacity	Radnezhad et al., 2015	Plant growth promoting rhizobacteria (PGPRs) are a group of bacteria that can actively colonize plant roots and can modulate plant growth. The present study was conducted to examine the effects of bio-priming with Azotobacter and Azospriliumon on the yield and resistance to drought stress of F. arundinacea Schreb seeds under different four levels of osmotic potential such as 0.5,1,1.5 and 2 Mpa t…	Rejected	No ERD15
ERD15' + 'gene expression'+ 'drought stress' + ' plants'+ 'PGPR'	Google scholar	Nitrogen Fixing Biofertilizers; Mechanism and Growth Promotion: A Review	Bhat et al., 2015	Nitrogen is generally considered one of the major limiting nutrients in plant growth. The biological process responsible for reduction of molecular nitrogen into ammonia is referred to as nitrogen fixation. A wide diversity of nitrogen-fixing bacterial species belonging to most phyla of the Bacteria domain has the capacity to colonize the rhizosphere and to interact with plants. Leguminous and ac…	Rejected	Review
ERD15' + 'gene expression'+ 'drought stress' + ' plants'+ 'PGPR'	Google scholar	Microbial Interventions in Agriculture and Environment	Dastagir et al., 2019		Rejected	Book
ERD15' + 'gene expression'+ 'drought stress' + ' plants'+ 'PGPR'	Google scholar	Drought Stress and Root-Associated Bacterial Communities	Hacquard et al., 2018	Root-associated bacterial communities play a vital role in maintaining health of the plant host. These communities exist in complex relationships, where composition and abundance of community members is dependent on a number of factors such as local soil chemistry, plant genotype and phenotype, and perturbations in the surrounding abiotic environment. One common perturbation, drought, has been sh…	Rejected	Review
ERD15' + 'gene expression'+ 'drought stress' + ' plants'+ 'PGPR'	Google scholar	Harnessing Bacterial Endophytes for Promotion of Plant Growth and Biotechnological Applications: An Overview	Eid et al., 2021	Endophytic bacteria colonize plants and live inside them for part of or throughout their life without causing any harm or disease to their hosts. The symbiotic relationship improves the physiology, fitness, and metabolite profile of the plants, while the plants provide food and shelter for the bacteria. The bacteria-induced alterations of the plants offer many possibilities for biotechno- logical…	Rejected	Review
ERD15' + 'gene expression'+ 'drought stress' + ' plants'+ 'PGPR'	Google scholar	Alleviation of Drought Stress and Metabolic Changes in Timothy (Phleum pratense L.) Colonized with Bacillus subtilis B26	Gagné-Bourque et al., 2016	Drought is a major limiting factor of crop productivity worldwide and its incidence is predicted to increase under climate change. Drought adaptation of cool-season grasses is thus a major challenge to secure the agricultural productivity under current and future climate conditions. Endophytes are non-pathogenic plant-associated bacteria that can play an important role in conferring resistance an…	Rejected	No ERD15
ERD15' + 'gene expression'+ 'drought stress' + ' plants'+ 'PGPR'	Google scholar	Potential advantage of rhizosheath microbiome, in contrast to rhizosphere microbiome, to improve drought tolerance in crops	Etesami et al., 2021	Drought stress–single or in combination with abiotic and biotic stresses–is a major constraint on agricultural production and threatens food security worldwide. This has further led to the need for some environmentally friendly approaches to ensure global food security. In this regard, using the potential of drought tolerant-plant growth-promoting microorganisms to minimize the effects of drought…	Rejected	Review
ERD15' + 'gene expression'+ 'drought stress' + ' plants'+ 'PGPR'	Google scholar	Microbes and Signaling Biomolecules Against Plant Stress Strategies of Plant- Microbe Relationships for Better Survival	Sharma et al., 2020		Rejected	Book
ERD15' + 'gene expression'+ 'drought stress' + ' plants'+ 'PGPR'	Google scholar	Plant Stress Biology Strategies and Trends	Giri et al.,.2021		Rejected	Book
ERD15' + 'gene expression'+ 'drought stress' + ' plants'+ 'PGPR'	Google scholar	Portraying Rhizobacterial Mechanisms in Drought Tolerance: A Way Forward Toward Sustainable Agriculture	Kaushal et al., 2019		Rejected	Book
ERD15' + 'gene expression'+ 'drought stress' + ' plants'+ 'PGPR'	Google scholar	Microbial Interventions in Agriculture and Environment Volume 2: Rhizosphere, Microbiome and Agro-ecology	Singh et al., 2019		Rejected	Book
ERD15' + 'gene expression'+ 'drought stress' + ' plants'+ 'PGPR'	Google scholar	PGPR-Biotechnology for Management of Abiotic and Biotic Stresses in Crop Plants	Govindasamy et al., 2008		Rejected	Review
