# Supplementary material for: Meta-analysis of plant growth-promoting rhizobacteria interaction with host plants: implications for drought stress response gene expression
Source: Front Plant Sci. 2024 Jan 15;14:1282553. doi: 10.3389/fpls.2023.1282553 (PMC10823023; doi:10.3389/fpls.2023.1282553)
Supplement: Supplementary file 19 [file Table_4.xlsx]

## Sheet: Foglio1
Keywords	Source	Title	Author	Abstract	Accepted/Rejected	Reason
MYB' + 'gene express'+ 'drought stress' + ' plants'+ 'PGPR'	Google scholar	Plant growth-promoting rhizobacteria: strategies to improve abiotic stresses under sustainable agriculture	Kumar et al., 2018	The abiotic stresses like drought, heavy metal and salts directly or indir- ectly influence the global environmental pollution and decrease the agri- cultural productivity. The stress tolerant plant growth promoting rhizobacteria (PGPR) play an important role against the abiotic stresses in terms of enhancing the efficacy of soil, plant growth promotion (PGP). Stress tolerance PGPRs have certain …	Rejected	Review
MYB' + 'gene express'+ 'drought stress' + ' plants'+ 'PGPR'	Google scholar	Recent methods of drought stress tolerance in plants	Ali et al., 2017	In the climate change scenario the drought has been diagnosed as major stress affecting crop productivity. This review demonstrates some recent findings on the amelioration of drought stress. Nanoparticles, synthetic growth regulators viz. Trinexapac-ethyl, and Biochar addition helps to economize the water budget of plants, enhances the bioavailability of water and nutrients as well as overcomes …	Rejected	Review
MYB' + 'gene express'+ 'drought stress' + ' plants'+ 'PGPR'	Google scholar	Plant growth promoting rhizobacteria Dietzia natronolimnaea modulates the expression of stress responsive genes providing protection of wheat from salinity stress	Bharti et al., 2016	Plant growth promoting rhizobacteria (PGPR) hold promising future for sustainable agriculture. Here, we demonstrate a carotenoid producing halotolerant PGPR Dietzia natronolimnaea STR1 protecting wheat plants from salt stress by modulating the transcriptional machinery responsible for salinity tolerance in plants. The expression studies confirmed the involvement of ABA-signalling cascade, as TaAB…	Rejected	No drought stress
MYB' + 'gene express'+ 'drought stress' + ' plants'+ 'PGPR'	Google scholar	Communication of plants with microbial world: Exploring the regulatory networks for PGPR mediated defense signaling	Bukhat et al., 2020	Agricultural manipulation of potentially beneficial rhizosphere microbes is increasing rapidly due to their multi- functional plant-protective and growth related benefits. Plant growth promoting rhizobacteria (PGPR) are mostly non-pathogenic microbes which exert direct benefits on plants while there are rhizosphere bacteria which indirectly help plant by ameliorating the biotic and/or abiotic str…	Rejected	Review
MYB' + 'gene express'+ 'drought stress' + ' plants'+ 'PGPR'	Google scholar	Climate change regulated abiotic stress mechanisms in plants: a comprehensive review	Chaudhry et al., 2022	Global climate change is identified as a major threat to survival of natural ecosystems. Climate change is a dynamic, multi- faceted system of alterations in environmental conditions that affect abiotic and biotic components of the world. It results in alteration in environmental conditions such as heat waves, intensity of rainfall, CO2 concentration and temperature that lead to rise in new pests…	Rejected	Review
MYB' + 'gene express'+ 'drought stress' + ' plants'+ 'PGPR'	Google scholar	Transcriptional alterations reveal Bacillus amyloliquefaciens-rice cooperation under salt stress	Chauhan et al. 2018	the Bacillus amyloliquefaciens-SN13 and model crop rice (Oryza sativa) were chosen to understand the complex regulatory networks that govern plant-PGPR interaction under salt stress. During stress, inoculation with SN13 significantly increased biomass, relative water content, proline and total soluble sugar in rice while decreased lipid peroxidation and electrolyte leakage. Extensive alterations …	Rejected	No MYB
MYB' + 'gene express'+ 'drought stress' + ' plants'+ 'PGPR'	Google scholar	Paenibacillus lentimorbus Enhanced Abiotic Stress Tolerance Through Lateral Root Formation and Phytohormone Regulation	Dixit et al., 2022	Under the stressed conditions plant growth-promoting rhizobacteria (PGPR) are able to stimulate plant growth through several mechanisms, including antioxidants alleviation, regulation of stress responsive genes and phytohormones etc. Pre- sent study is conducted to investigate the impact of Paenibacillus lentimorbus B-30488 inoculation on salinity and drought stress mitigation in Arabidopsis thal…	Rejected	No MYB
MYB' + 'gene express'+ 'drought stress' + ' plants'+ 'PGPR'	Google scholar	The influence of plant growth-promoting rhizobacteria in plant tolerance to abiotic stress: a survival strategy	Enebe et al., 2018	Action is needed to face the global threat arising from inconsistent rainfall, rise in temperature, and salinization of farm lands which may be the product of climate change. As crops are adversely affected, man and animals may face famine. Plants are severely affected by abiotic stress (drought, salinity, alkalinity, and temperature), which impairs yield and results in loss to farmers and to the…	Rejected	Review
MYB' + 'gene express'+ 'drought stress' + ' plants'+ 'PGPR'	Google scholar	Potential role of phytohormones and plant growth-promoting rhizobacteria in abiotic stresses: consequences for changing environment	Fahad et al., 2015	Plants are sessile beings, so the need of mecha- nisms to flee from unfavorable circumstances has provided the development of unique and sophisticated responses to environmental stresses. Depending on the degree of plasticity, many morphological, cellular, anatomical, and physiological changes occur in plants in response to abiotic stress. Phyto- hormones are small molecules that play critical ro…	Rejected	Review
MYB' + 'gene express'+ 'drought stress' + ' plants'+ 'PGPR'	Google scholar	Recent developments in use of 1-aminocyclopropane-1- carboxylate (ACC) deaminase for conferring tolerance to biotic and abiotic stress	Gontia-Mishra et al., 2014	Ethylene is an essential plant hormone also known as a stress hormone because its synthesis is accelerated by induction of a variety of biotic and abiotic stress. The plant growth promoting bacteria containing the enzyme 1-aminocyclopropane-1-car- boxylate (ACC) deaminase enhances plant growth by decreasing plant ethylene levels under stress condi- tions. The expression of ACC deaminase (acdS) ge…	Rejected	Review
MYB' + 'gene express'+ 'drought stress' + ' plants'+ 'PGPR'	Google scholar	Plant growth-promoting rhizobacteria—alleviators of abiotic stresses in soil: A review	Gosowami et al., 2020	With the continuous increase in human population, there is widespread usage of chemical fertilizers that are responsible for introducing abiotic stresses in agricultural crop lands. Abiotic stresses are major constraints for crop yield and global food security and therefore require an immediate response. The implementation of plant growth-promoting rhizobacteria (PGPR) into the agricultural produ…	Rejected	Review
MYB' + 'gene express'+ 'drought stress' + ' plants'+ 'PGPR'	Google scholar	Plant Growth-Promoting Rhizobacteria Enhance Abiotic Stress Tolerance in Solanum tuberosum Through Inducing Changes in the Expression of ROS-Scavenging Enzymes and Improved Photosynthetic Performance	Gururani et al., 2013	In this report we address the changes in the expression of the genes involved in ROS scavenging and ethylene biosynthesis induced by the inoculation of plant growth-promoting rhizobacteria (PGPR) isolated from potato rhizosphere. The two Bacillus isolates used in this investigation had earlier demonstrated a striking influence on potato tuberization. These isolates showed enhanced 1-aminocyclopro…	Rejected	No MYB
MYB' + 'gene express'+ 'drought stress' + ' plants'+ 'PGPR'	Google scholar	Pseudomonas putida modulates the expression of miRNAs and their target genes in response to drought and salt stresses in chickpea (Cicer arietinum L.)	Jatan et al., 2019	MicroRNAs are small non-coding regulatory RNA molecules that play an important role in the modulation of gene expression during various environmental stresses. Pseudomonas putida RA, a plant growth promoting rhi- zobacteria (PGPR) colonizes the root surface of plants improving their growth and development during abiotic stresses modulating the expression of stress-responsive genes; however, the i…	Mi RNA
MYB' + 'gene express'+ 'drought stress' + ' plants'+ 'PGPR'	Google scholar	Crosstalk amongst phytohormones from planta and PGPR under biotic and abiotic stresses	Khan et al., 2020	Phytohormones are endogenously produced organic substances indispensable for regulating plant growth and yield and also play major role in inducing tolerance to plants against various biotic and abiotic stresses. The convergence points among hormone signal transduction cascades are considered as cross-talk which are crucial for plant development as well as for plant responses to biotic and abioti…	Rejected	Review
MYB' + 'gene express'+ 'drought stress' + ' plants'+ 'PGPR'	Google scholar	Plant Responses to Abiotic Stresses and Rhizobacterial Biostimulants: Metabolomics and Epigenetics Perspectives	Lephatsi et al., 2021	In response to abiotic stresses, plants mount comprehensive stress-specific responses which mediate signal transduction cascades, transcription of relevant responsive genes and the accumulation of numerous different stress-specific transcripts and metabolites, as well as coordinated stress-specific biochemical and physiological readjustments. These natural mechanisms employed by plants are howeve…	Rejected	Review
MYB' + 'gene express'+ 'drought stress' + ' plants'+ 'PGPR'	Google scholar	Gene expression profiling of tomato roots interacting with Pseudomonas fluorescens unravels the molecular reprogramming that occurs during the early phases of colonization	Scotti et al., 2019	The concerns of people over the wide use of chemicals are determining an increasing attention to more eco-friendly management practices in agriculture. Plant growth promoting rhizobacteria (PGPR) are emerging as important beneficial microbial inoculants because of their capability to promote plant growth and improve plant protection. We performed RNASeq to analyze gene expression profiling at 24,…	Rejected	No Abiotic stress
MYB' + 'gene express'+ 'drought stress' + ' plants'+ 'PGPR'	Google scholar	Plant growth promoting rhizobacteria for sustainable agricultural practices with special reference to biotic and abiotic stresses	Shameer et al., 2018	The most common, devastating problem in agriculture is plant (pathogenic) diseases and abiotic conditions which have a profound effect on growth and yield of the plant resulting in heavy losses. In order to prevent losses, different chemicals are used indiscriminately, which in turn lead to environmental pollution due to their persistence and toxicity yet employed to meet consumer demand. To figh…	Rejected	Review
MYB' + 'gene express'+ 'drought stress' + ' plants'+ 'PGPR'	Google scholar	An OsNAM gene plays important role in root rhizobacteria interaction in transgenic Arabidopsis through abiotic stress and phytohormone crosstalk	Tiwari et al., 2021	Salinity is one of the major constraints that affect crop development and yield. Plants respond and adapt to salt stress via complex mechanisms that involve morpho-physiological, biochemical, and molecular changes. The expression of numerous genes is known to alter during various abiotic stresses and impart stress tolerance. Recently, some known rhizos- pheric microbes have also been used to miti…	Rejected	No MYB
MYB' + 'gene express'+ 'drought stress' + ' plants'+ 'PGPR'	Google scholar	Genome-wide identification and expression analysis of Arabidopsis GRAM-domain containing gene family in response to abiotic stresses and PGPR treatment	Tiwari et al., 2021	Characterization of stress-responsive genes is important to understand the genomics perspective of stress toler- ance. In this purview, several gene-families are being identified and characterized in the model and non-model plant species, which has greatly enhanced the knowledge of molecular intricacies associated with stress toler- ance. One such gene family is the GRAM-domain containing which h…	Rejected	No MYB
MYB' + 'gene express'+ 'drought stress' + ' plants'+ 'PGPR'	Google scholar	Regulation of Drought-Responsive Gene Expression in Glycine max L. Merrill is Mediated Through Pseudomonas simiae Strain AU	Vaishnav et al., 2019	Plant growth promoting rhizobacteria (PGPR) have been described for sustainable agriculture practices as being a vital agent for abiotic and biotic stress mitigation and growth promotion in plants. In the present research, the authors emphasize the role of drought tolerant PGPR namely, Pseudomonas simiae strain AU, in protection of soybean plants by modulating the gene expression profile and phyt…	Rejected	No MYB
MYB' + 'gene express'+ 'drought stress' + ' plants'+ 'PGPR'	Google scholar	Microarray Analysis of the Gene Expression Profile Induced by the Endophytic Plant Growth-Promoting Rhizobacteria, Pseudomonas fluorescens FPT9601-T5 in Arabidopsis	Wang et al., 2005	Pseudomonas fluorescens FPT9601-T5 was originally iden- tified as an endophytic plant growth-promoting rhizobac- teria (PGPR) on tomato. To perform a molecular dissec- ttion of physiological and biochemical changes occurring in the host triggered by P. fluorescens FPT9601-T5 colonization, the model plant Arabidopsis was used in this study. Root colonization of Arabidopsis with P. fluorescens FPT9…	Rejected	No Abiotic stress
MYB' + 'gene express'+ 'drought stress' + ' plants'+ 'PGPR'	Google scholar	Halotolerant plant-growth promoting rhizobacteria modulate gene expression and osmolyte production to improve salinity tolerance and growth in Capsicum annum L.	Yasin et al., 2018	Some rhizobacteria have demonstrated a noteworthy role in regulation of plant growth and biomass production under biotic and abiotic stresses. The present study was intended to explicate the ameliorative consequences of halotolerant plant growth- promoting rhizobacteria (HPGPR) on growth of capsicum plants subjected to salt stress. Salt stress was ascertained by supplementing 1 and 2 g NaCl kg−1 …	Rejected	No MYB
MYB' + 'gene express'+ 'drought stress' + ' plants'+ 'PGPR'	Google scholar	Gene expression profiling through microarray analysis in Arabidopsis thaliana colonized by Pseudomonas putida MTCC5279, a plant growth promoting rhizobacterium	Srivastava et al., 2012		Rejected	No Abiotic stress
MYB' + 'gene express'+ 'drought stress' + ' plants'+ 'PGPR'	Google scholar	Modulation of proline metabolic gene expression in Arabidopsis thaliana under water-stressed conditions by a drought-mitigating Pseudomonas putida strain	Ghosh et al., 2017	Although amelioration of drought stress in plants by plant growth promoting rhizobacteria (PGPR) is a well reported phenomenon, the molecular mechanisms governing it are not well understood. We have investigated the role of a drought ameliorating PGPR strain, Pseudomonas putida GAP-P45 on the regulation of proline metabolic gene expres- sion in Arabidopsis thaliana under water-stressed conditions…	Rejected	No MYB
MYB' + 'gene express'+ 'drought stress' + ' plants'+ 'PGPR'	Google scholar	miRNAs: Major modulators for crop growth and development under abiotic stresses	Noman et al., 2017	Cumulatively, biotic and abiotic stresses of various magnitudes can decrease the production of crops by 70%. miRNAs have emerged as a genetic tool with enormous potential that can be exploited to understand stress tolerance at the molecular level and eventually regulate stress in crops. Plant miRNA targets frequently fit into diverse families of TFs that control the expression of genes related to…	Rejected	Review
MYB' + 'gene express'+ 'drought stress' + ' plants'+ 'PGPR'	Google scholar	Dynamic Chemical Communication between Plant and Bacteria through Airborne Signals: Induced Resistance by Bacterial Volatiles	Farag et al., 2013	Certain plant growth-promoting rhizobacteria (PGPR) elicit induced systemic resistance (ISR) and plant growth promotion in the absence of physical contact with plants via volatile organic compound (VOC) emissions. In this article, we review the recent progess made by research into the interactions between PGPR VOCs and plants, focusing on VOC emission by PGPR strains in plants. Particular attenti…	Rejected	Review
MYB' + 'gene express'+ 'drought stress' + ' plants'+ 'PGPR'	Google scholar	Bacillus velezensis 5113 Induced Metabolic and Molecular Reprogramming during Abiotic Stress Tolerance in Wheat	Abd El-Daim et al., 2019	Abiotic stresses are main limiting factors for agricultural production around the world. Plant growth promoting rhizobacteria (PGPR) have been shown to improve abiotic stress tolerance in several plants. However, the molecular and physiological changes connected with PGPR priming of stress management are poorly understood. The present investigation aimed to explore major metabolic and molecular c…	Accepted
MYB' + 'gene express'+ 'drought stress' + ' plants'+ 'PGPR'	Google scholar	Transcriptome analysis and differential gene expression profiling of two contrasting quinoa genotypes in response to salt stress	Shi et al., 2020	Background: Soil salinity is one of the major abiotic stress factors that affect crop growth and yield, which seriously restricts the sustainable development of agriculture. Quinoa is considered as one of the most promising crops in the future for its high nutrition value and strong adaptability to extreme weather and soil conditions. However, the molecular mechanisms underlying the adaptive resp…	Rejected	No PGPR
MYB' + 'gene express'+ 'drought stress' + ' plants'+ 'PGPR'	Google scholar	Transcription Factors Interact with ABA through Gene Expression and Signaling Pathways to Mitigate Drought and Salinity Stress	Hussain et al., 2021	Among abiotic stressors, drought and salinity seriously affect crop growth worldwide. In plants, research has aimed to increase stress-responsive protein synthesis upstream or downstream of the various transcription factors (TFs) that alleviate drought and salinity stress. TFs play diverse roles in controlling gene expression in plants, which is necessary to regulate biological processes, such as…	Rejected	No PGPR
MYB' + 'gene express'+ 'drought stress' + ' plants'+ 'PGPR'	Google scholar	Plant growth-promoting rhizobacterium Pseudomonas PS01 induces salt tolerance in Arabidopsis thaliana	Chu et al., 2019	Objectives: Plant growth-promoting rhizobacteria (PGPR) may contribute to sustainable crop production by improv- ing plant growth and/or plant tolerance to abiotic stresses. Soil salinity, which limits the productivity of crop plants, is one of the major concerns of modern agriculture, especially in countries heavily affected by climate change as Vietnam. Currently, only a few reports have studie…	Rejected	No MYB
MYB' + 'gene express'+ 'drought stress' + ' plants'+ 'PGPR'	Google scholar	Banana (Musa acuminata) transcriptome profiling in response to rhizobacteria: Bacillus amyloliquefaciens Bs006 and Pseudomonas fluorescens Ps006	Gamez et al., 2019	Banana is one of the most important crops in tropical and sub-tropical regions. To meet the demands of international markets, banana plantations require high amounts of chemical fertilizers which translate into high farming costs and are hazardous to the environment when used excessively. Beneficial free-living soil bacteria that colonize the rhizosphere are known as plant growth-promoting rhizob…	Rejected	No Abiotic stress
MYB' + 'gene express'+ 'drought stress' + ' plants'+ 'PGPR'	Google scholar	Effects of plant growth-promoting rhizobacteria on the molecular responses of maize under drought and heat stresses: A review	Notununo et al., 2022	Drought and heat are major environmental stresses that continually influence plant growth and development. Under field conditions, these stresses occur more frequently in combination than alone, which magnifies corresponding detrimental effects on the growth and productivity of agriculturally important crops. Plant responses to such abiotic stresses are quite complex and manifested in a range of …	Rejected	Review
MYB' + 'gene express'+ 'drought stress' + ' plants'+ 'PGPR'	Google scholar	Use of plant growth promoting rhizobacteria (PGPRs) with multiple plant growth promoting traits in stress agriculture: Action mechanisms and future prospects	Etesami et al., 2018	Increased incidence of abiotic stresses impacting adversely plant growth and productivity in major crops is being witnessed all over the world. Therefore, as a result of such stress factors, plant growth under the stress conditions will be less than the non-stress conditions. Growing concerns and global demand for correct, environmentally- friendly techniques exist to reduce the adverse effects o…	Rejected	Review
MYB' + 'gene express'+ 'drought stress' + ' plants'+ 'PGPR'	Google scholar	Use of plant growth promoting rhizobacteria (PGPRs) with multiple plant growth promoting traits in stress agriculture: Action mechanisms and future prospects	Etesami et al., 2018	Increased incidence of abiotic stresses impacting adversely plant growth and productivity in major crops is being witnessed all over the world. Therefore, as a result of such stress factors, plant growth under the stress conditions will be less than the non-stress conditions. Growing concerns and global demand for correct, environmentally- friendly techniques exist to reduce the adverse effects o…	Rejected	Review
MYB' + 'gene express'+ 'drought stress' + ' plants'+ 'PGPR'	Google scholar	Enhancement of growth and salt tolerance of rice seedlings (Oryza sativa L.) by regulating ethylene production with a novel halotolerant PGPR strain Glutamicibacter sp. YD01 containing ACC deaminase activity	Ji et al., 2020	Plant growth-promoting rhizobacteria can stimulate not only plant growth and development, but also alleviate the negative effects on plants caused by abiotic stresses. In this study, a novel halotolerant strain was isolated and identified as Glutamici- bacter sp. (YD01) using 16S rDNA analysis. This strain tolerated up to 10% NaCl and showed two growth-promoting traits such as 1-aminocyclopropane…	Rejected	No MYB
MYB' + 'gene express'+ 'drought stress' + ' plants'+ 'PGPR'	Google scholar	Global Gene Expression Analysis Reveals Crosstalk between Response Mechanisms to Cold and Drought Stresses in Cassava Seedlings	Li et al., 2017	Abiotic stress negatively impacts cassava (Manihot esculenta) growth and yield. Several molecular mechanisms of plant response to cold and drought have been identified and described in the literature, however, little is known about the crosstalk of the responses of cassava to these two stresses. To elucidate this question, transcriptome analysis of cassava seedlings under cold or PEG-simulated dr…	Rejected	No PGPR
MYB' + 'gene express'+ 'drought stress' + ' plants'+ 'PGPR'	Google scholar	Proposed some interactions at molecular level of PGPR coinoculated with Bradyrhizobium diazoefficiens USDA110 and B. japonicum THA6 on soybean symbiosis and its potential of field application	Prakamhang et al., 2015	The objectives of this research were to select the appropriate plant growth promoting rhizobacteria (PGPR) and evaluate their influence in promoting nodulation and N2-fixing efficiency of soybean (Glycine max) by coinoculation with Bradyrhizobium diazoefficiens USDA110 and B. japonicum THA6 strains. Selected 12 PGPR performed a significant capability of promoting N2-fixation, nodule number, nodul…	Rejected	No Abiotic stress
MYB' + 'gene express'+ 'drought stress' + ' plants'+ 'PGPR'	Google scholar	Beneficial features of plant growth-promoting rhizobacteria for improving plant growth and health in challenging conditions: A methodical review	Oleńska et al., 2020	New eco-friendly approaches are required to improve plant biomass production. Beneficial plant growth- promoting (PGP) bacteria may be exploited as excellent and efficient biotechnological tools to improve plant growth in various – including stressful – environments. We present an overview of bacterial mechanisms which contribute to plant health, growth, and development. Plant growth promoting rh…	Rejected	Review
MYB' + 'gene express'+ 'drought stress' + ' plants'+ 'PGPR'	Google scholar	Role of microorganisms in adaptation of agriculture crops to abiotic stresses	Grover et al., 2011	Increased incidences of abiotic and biotic stresses impacting productivity in principal crops are being witnessed all over the world. Extreme events like prolonged droughts, intense rains and flooding, heat waves and frost damages are likely to further increase in future due to cli- mate change. A wide range of adaptations and mitigation strategies are required to cope with such impacts. Efficien…	Rejected	Review
MYB' + 'gene express'+ 'drought stress' + ' plants'+ 'PGPR'	Google scholar	Comparative Transcriptomics and Metabolomics Reveal an Intricate Priming Mechanism Involved in PGPR-Mediated Salt Tolerance in Tomato	Mellidou et al., 2021	Plant-associated beneficial strains inhabiting plants grown under harsh ecosystems can help them cope with abiotic stress factors by positively influencing plant physiology, development, and environmental adaptation. Previously, we isolated a potential plant growth promoting strain (AXSa06) identified as Pseudomonas oryzihabitans, possessing 1-aminocyclopropane-1-carboxylate deaminase activity, p…	Rejected	No drought stress
MYB' + 'gene express'+ 'drought stress' + ' plants'+ 'PGPR'	Google scholar	Overexpression of differentially expressed AhCytb6 gene during plant‐microbe interaction improves tolerance to N2 deficit and salt stress in transgenic tobacco	Alexander et al., 2021	Stenotrophomonas maltophilia has plant growth‐promoting potential, and interaction with Arachis hypogaea changes host‐plant physiology, biochemistry, and metabolomics, which provides tolerance under the N2 starvation conditions. About 226 suppression subtractive hybridization clones were obtained from plant‐microbe interaction, of which, about 62% of gene sequences were uncharacterized, whereas 2…	Rejected	No drought stress
MYB' + 'gene express'+ 'drought stress' + ' plants'+ 'PGPR'	Google scholar	A consortium of rhizobacterial strains and biochemical growth elicitors improve cold and drought stress tolerance in rice (Oryza sativa L.)	Kakar et al., 2015	In the present study, a consortium of two rhizobacteria Bacillus amyloliquefaciens Bk7 and Brevibacillus laterosporus B4, termed ‘BB’, biochemical elicitors salicylic acid and b-aminobutyric acid (SB) and their mixture (BBSB) were investigated for cold and drought stress tolerance in rice plants. After withholding water for 16 days, rice plants treated with BBSB showed 100% survival, improved see…	Accepted
MYB' + 'gene express'+ 'drought stress' + ' plants'+ 'PGPR'	Google scholar	Gene expression and metabolite analysis in barley inoculated with net blotch fungus and plant growth-promoting rhizobacteria	Backes et al., 2021	Net blotch, caused by the ascomycete Drechslera teres, can compromise barley production. Beneficial bacteria strains are of substantial interest as biological agents for plant protection in agriculture. Belonging to the genus Paraburkholderia, a bacterium, referred to as strain B25, has been identified as protective for barley against net blotch. The strain Paraburkholderia phytofirmans (strain P…	Rejected	No Abiotic stress
MYB' + 'gene express'+ 'drought stress' + ' plants'+ 'PGPR'	Google scholar	Biostimulants for Plant Growth and Mitigation of Abiotic Stresses: A Metabolomics Perspective	Nephali et al., 2020	Adverse environmental conditions due to climate change, combined with declining soil fertility, threaten food security. Modern agriculture is facing a pressing situation where novel strategies must be developed for sustainable food production and security. Biostimulants, conceptually defined as non-nutrient substances or microorganisms with the ability to promote plant growth and health, represen…	Rejected	Review
MYB' + 'gene express'+ 'drought stress' + ' plants'+ 'PGPR'	Google scholar	The role of biostimulants and bioeffectors as alleviators of abiotic stress in crop plants	Van Oosten et al., 2017	The use of bioeffectors, formally known as plant biostimulants, has become common practice in agriculture and provides a number of benefits in stimulating growth and protecting against stress. A biostimulant is loosely defined as an organic material and/or microorganism that is applied to enhance nutrient uptake, stimulate growth, enhance stress tolerance or crop quality. This review is intended …	Rejected	Review
MYB' + 'gene express'+ 'drought stress' + ' plants'+ 'PGPR'	Google scholar	Jasmonic acid: a key frontier in conferring abiotic stress tolerance in plants	Raza et al., 2021	Abiotic stresses are the primary sources of crop losses globally. The identification of key mechanisms deployed and estab- lished by plants in response to abiotic stresses is necessary for the maintenance of their growth and persistence. Recent discoveries have revealed that phytohormones or plant growth regulators (PGRs), mainly jasmonic acid (JA), have increased our knowledge of hormonal signal…	Rejected	Review
MYB' + 'gene express'+ 'drought stress' + ' plants'+ 'PGPR'	Google scholar	Advances in Wheat Physiology in Response to Drought and the Role of Plant Growth Promoting Rhizobacteria to Trigger Drought Tolerance	Camaille et al., 2021	In the coming century, climate change and the increasing human population are likely lead- ing agriculture to face multiple challenges. Agricultural production has to increase while preserving natural resources and protecting the environment. Drought is one of the major abiotic problems, which limits the growth and productivity of crops and impacts 1–3% of all land.To cope with unfavor- able wate…	Rejected	Review
MYB' + 'gene express'+ 'drought stress' + ' plants'+ 'PGPR'	Google scholar	Volatile compounds from Alcaligenes faecalis JBCS1294 confer salt tolerance in Arabidopsis thaliana through the auxin and gibberellin pathways and differential modulation of gene expression in root and shoot tissues	Bhattacharyya et al., 2015	Volatile compounds from rhizobacteria are known to elicit and regulate plant growth and defense against various biotic and abiotic stresses. In the present study, we elucidated the biological role of volatiles from Alcaligenes faecalis strain JBCS1294 on the growth per- formance of Arabidopsis thaliana under salt stress. JBCS1294 volatiles promoted gains in fresh weight and shoot length of Arabid…	Rejected	No MYB
MYB' + 'gene express'+ 'drought stress' + ' plants'+ 'PGPR'	Google scholar	Transcriptomic response of Arabidopsis thaliana after 24 h incubation with the biocontrol fungus Trichoderma harzianum	Morán-Diez et al., 2012	Trichoderma harzianum is a fungus used as biocontrol agent using its antagonistic abilities against phy- topathogenic fungi, although it has also direct effects on plants, increasing or accelerating their growth and resistance to diseases and the tolerance to abiotic stresses. We analyzed Arabidopsis thaliana gene expression changes after 24 h of incubation in the presence of T. harzianum T34 usi…	Rejected	Biotic stress
MYB' + 'gene express'+ 'drought stress' + ' plants'+ 'PGPR'	Google scholar	Differential gene expression of rice roots inoculated with the diazotroph Herbaspirillum seropedicae	Brusamarello-Santos et al., 2011	Background and aims Rice (Oryza sativa L.) is the primary source of carbohydrate for the majority of the World's population. Herbaspirillum seropedicae is a diazotroph that lives within and on the surface of rice roots. It can promote the growth of rice, partly by supplying it with fixed nitrogen. Methods To better understand the rice–H. seropedicae interaction, cDNA libraries from rice roots eit…	Rejected	No Abiotic stress
MYB' + 'gene express'+ 'drought stress' + ' plants'+ 'PGPR'	Google scholar	Action of jasmonates in plant stress responses and development — Applied aspects	Wasternack et al., 2014	Jasmonates (JAs) are lipid-derived compounds acting as key signaling compounds in plant stress responses and development. The JA co-receptor complex and several enzymes of JA biosynthesis have been crystallized, and various JA signal transduction pathways including cross-talk to most of the plant hormones have been intensively studied. Defense to herbivores and necrotrophic pathogens are mediated…	Rejected	Review
MYB' + 'gene express'+ 'drought stress' + ' plants'+ 'PGPR'	Google scholar	Transcriptome Profiles Reveal the Growth-Promoting Mechanisms of Paenibacillus polymyxa YC0136 on Tobacco (Nicotiana tabacum L.)	Liu et al., 2020	Paenibacillus polymyxa is an important member of the plant growth-promoting rhizobacteria. P. polymyxa YC0136 inoculation had beneficial effect on growth promotion and biological control of tobacco (Nicotiana tabacum L.) under field conditions. This study aimed to reveal the growth-promoting mechanisms of strain YC0136. In growth- promotion assays, tobacco plant height was increased by 8.42% and …	Rejected	No Abiotic stress
MYB' + 'gene express'+ 'drought stress' + ' plants'+ 'PGPR'	Google scholar	Plant survival under drought stress: Implications, adaptive responses, and integrated rhizosphere management strategy for stress mitigation	Zia et al., 2021	In many regions of the world, the incidence and extent of drought spells are predicted to increase which will create considerable pressure on global agricultural yields. Most likely among all the abiotic stresses, drought has the strongest effect on soil biota and plants along with complex environmental effects on other ecological sys- tems. Plants being sessile appears the least resilient where …	Rejected	Review
MYB' + 'gene express'+ 'drought stress' + ' plants'+ 'PGPR'	Google scholar	Effect of the presence of the plant growth promoting rhizobacterium (PGPR) Chryseobacterium balustinum Aur9 and salt stress in the pattern of flavonoids exuded by soybean roots	Dardanelli et al., 2020	In this work we studied how biotic and abiotic stresses can alter the pattern of flavonoids exuded by Osumi soybean roots. A routine method was developed for the detection and characterization of the flavonoids present in soybean root exudates using HPLC-MS/MS. Then, a systematic screening of the flavonoids exuded under biotic stress, the pres- ence of a plant growth promoting rhizobacterium, and…	Rejected	No MYB
MYB' + 'gene express'+ 'drought stress' + ' plants'+ 'PGPR'	Google scholar	Role of DREB transcription factors in abiotic and biotic stress tolerance in plants	Agarwal et al., 2006	Abiotic and biotic stresses negatively influence survival, biomass production and crop yield. Being multi- genic as well as a quantitative trait, it is a challenge to understand the molecular basis of abiotic stress tolerance and to manipulate it as compared to biotic stresses. Lately, some transcription factor(s) that regulate the expression of several genes related to stress have been discovere…	Rejected	Review
MYB' + 'gene express'+ 'drought stress' + ' plants'+ 'PGPR'	Google scholar	Alleviation of drought stress in mung bean by strain Pseudomonas aeruginosa GGRJ21	Sarma et al., 2014	Backgrounds and aims Mung bean (Vigna radiata (L.) R. Wilczek), a widely cultivated pulse crops in India, experiences severe drought stress during the cultivation period. Apart from the conventional plant breeding and transgenic approaches, the application of plant growth- promoting rhizobacteria (PGPR) has always been a promising approach to improve abiotic stress tolerance in crop plants. The a…	Rejected	Review
MYB' + 'gene express'+ 'drought stress' + ' plants'+ 'PGPR'	Google scholar	Gene expression profile affected by volatiles of new plant growth promoting rhizobacteria, Bacillus subtilis strain JS, in tobacco	Kim et al., 2015	Specific bacterial strains that promote plant growth have been investigated extensively and are char- acterized as plant growth-promoting rhizobacteria (PGPR). To identify the series of genes involved in PGPR-mediated enhanced plant growth, suppression subtractive hybridiza- tion was performed using cDNA from tobacco plants exposed to the PGPR strain, Bacillus subtilis strain JS. After hybridizat…	Rejected	No Abiotic stress
MYB' + 'gene express'+ 'drought stress' + ' plants'+ 'PGPR'	Google scholar	Plant growth-promoting rhizobacteria act as biostimulants in horticulture	Ruzzi et al., 2015		Rejected	Review
MYB' + 'gene express'+ 'drought stress' + ' plants'+ 'PGPR'	Google scholar	Transcriptome profiling of genes involved in induced systemic salt tolerance conferred by Bacillus amyloliquefaciens FZB42 in Arabidopsis thaliana	Liu et al., 2016	Plant growth-promoting Bacillus amyloliquefaciens FZB42 induces systemic salt tolerance in Arabidopsis and enhances the fresh and dry weight. However, the underlying molecular mechanism that allows plants to respond to FZB42 and exhibit salt tolerance is largely unknown. Therefore, we performed large-scale transcriptome sequencing of Arabidopsis shoot tissues grown under salt stress with or witho…	Rejected	No drought stress
MYB' + 'gene express'+ 'drought stress' + ' plants'+ 'PGPR'	Google scholar	Enhancement of drought stress tolerance in crops by plant growth promoting rhizobacteria	Vurukonda et al., 2016	Drought is one of the major constraints on agricultural productivity worldwide and is likely to further increase. Several adaptations and mitigation strategies are required to cope with drought stress. Plant growth promoting rhizobacteria (PGPR) could play a significant role in alleviation of drought stress in plants. These beneficial microorganisms colonize the rhizosphere/endo-rhizosphere of pl…	Rejected	Review
MYB' + 'gene express'+ 'drought stress' + ' plants'+ 'PGPR'	Google scholar	Role of Local Biofertilizer in Enhancing the Oxidative Stress Defence Systems of Date Palm Seedling (Phoenix dactylifera) against Abiotic Stress	Harkousse et al., 2021	Among the abiotic stresses, drought is the first environmental stress responsible for a decrease in agricultural production worldwide; it affects plants in various ways, including slowing down plant growth and disrupting its general physiology. Arbuscular mycorrhizal symbiosis and plant growth-promoting rhizobacteria (PGPR) are considered to be the bioameliorators of the plant’s resistance to wat…	Rejected	No MYB
MYB' + 'gene express'+ 'drought stress' + ' plants'+ 'PGPR'	Google scholar	Roles of Plant Growth-Promoting Rhizobacteria (PGPR) in Stimulating Salinity Stress Defense in Plants: A Review	Ha-Tran et al., 2021	To date, soil salinity becomes a huge obstacle for food production worldwide since salt stress is one of the major factors limiting agricultural productivity. It is estimated that a significant loss of crops (20–50%) would be due to drought and salinity. To embark upon this harsh situation, numerous strategies such as plant breeding, plant genetic engineering, and a large variety of agri- cultura…	Rejected	Review
MYB' + 'gene express'+ 'drought stress' + ' plants'+ 'PGPR'	Google scholar	Priming of pathogenesis related-proteins and enzymes related to oxidative stress by plant growth promoting rhizobacteria on rice plants upon abiotic and biotic stress challenge	García-Cristobal et al., 2015	Two plant growth promoting rhizobacteria (PGPR) were tested to evaluate their capacity to prime rice seedlings against stress challenge (salt and Xanthomonas campestris infection). As is accepted that plants respond to biotic and abiotic stresses by generation of reactive oxygen species (ROS), enzyme activi- ties related to oxidative stress (ascorbate peroxidase (APX, EC 1.11.1.11), guaiacol pero…	Rejected	No MYB
MYB' + 'gene express'+ 'drought stress' + ' plants'+ 'PGPR'	Google scholar	Plant Growth-Promoting Rhizobacteria as a Green Alternative for Sustainable Agriculture	Chandran et al., 2021	Environmental stress is a major challenge for sustainable food production as it reduces yield by generating reactive oxygen species (ROS) which pose a threat to cell organelles and biomolecules such as proteins, DNA, enzymes, and others, leading to apoptosis. Plant growth-promoting rhizobac- teria (PGPR) offers an eco-friendly and green alternative to synthetic agrochemicals and conventional agri…	Rejected	Review
MYB' + 'gene express'+ 'drought stress' + ' plants'+ 'PGPR'	Google scholar	Digital gene expression profiling of the pathogen-resistance mechanism of Oryza sativa 9311 in response to Bacillus amyloliquefaciens FZB42 induction	Xie al., 2017	Plant growth-promoting rhizobacteria (PGPR) are beneficial soil microorganisms that colonize plant roots for nutritional purposes and benefit plants by increasing plant growth or reducing plant disease. To clarify the complex mechanisms underlying plant-PGPR interactions, transcriptomic analyses of the response of rice (Oryza sativa) 9311 to Bacillus amyloliquefaciens FZB42 were carried out using…	Rejected	Biotic stress
MYB' + 'gene express'+ 'drought stress' + ' plants'+ 'PGPR'	Google scholar	Introgression of a novel gene AhBINR differentially expressed during PGPR Brachybacterium saurashtrense-Arachis hypogaea interaction enhances plant performance under nitrogen starvation and salt stress in tobacco	Alexander et al., 2022	Plant growth-promoting rhizobacteria provide endurance during environmental stress conditions. Previously, we have shown that the interaction of the halotolerant diazotrophic bacteria Brachybacterium saurashtrense JG06 induces physio-biochemical and molecular changes in Arachis hypogaea under nitrogen starvation conditions. Here we deciphered the role of a novel gene AhBINR that was differentiall…	Rejected	No drought stress
MYB' + 'gene express'+ 'drought stress' + ' plants'+ 'PGPR'	Google scholar	Insight into Recent Progress and Perspectives in Improvement of Antioxidant Machinery upon PGPR Augmentation in Plants under Drought Stress: A Review	Gowtham et al., 2022	Agriculture has a lot of responsibility as the rise in the world’s population demands more food requirements. However, more than one type of biotic and abiotic stress continually impacts agricultural productivity. Drought stress is a major abiotic stress that significantly affects agricultural productivity every year as the plants undergo several morphological, biochemical, and physiological modi…	Rejected	Review
MYB' + 'gene express'+ 'drought stress' + ' plants'+ 'PGPR'	Google scholar	Microbial interactions in the rhizosphere: beneficial influences of plant growth-promoting rhizobacteria on nutrient acquisition process. A review	Pii et al., 2015	Plant growth-promoting rhizobacteria (PGPR) are soil bacteria that are able to colonize rhizosphere and to en- hance plant growth by means of a wide variety of mechanisms like organic matter mineralization, biological control against soil-borne pathogens, biological nitrogen fixation, and root growth promotion. A very interesting feature of PGPR is their ability of enhancing nutrient bioavailabil…	Rejected	Review
MYB' + 'gene express'+ 'drought stress' + ' plants'+ 'PGPR'	Google scholar	Genetic, Epigenetic, Genomic and Microbial Approaches to Enhance Salt Tolerance of Plants: A Comprehensive Review	Saradadevi et al., 2021	Globally, soil salinity has been on the rise owing to various factors that are both human and environmental. The abiotic stress caused by soil salinity has become one of the most damaging abiotic stresses faced by crop plants, resulting in significant yield losses. Salt stress induces physiological and morphological modifications in plants as a result of significant changes in gene expression pat…	Rejected	Review
MYB' + 'gene express'+ 'drought stress' + ' plants'+ 'PGPR'	Google scholar	Interaction between arbuscular mycorrhizal fungi and Bacillus spp. in soil enhancing growth of crop plants	Nanjundappa et al., 2019	Soil microorganisms play an important role in enhancing soil fertility and plant health. Arbuscular mycorrhizal fungi and plant growth promoting rhizobacteria form a key component of the soil microbial population. Arbuscular mycor- rhizal fungi form symbiotic association with most of the cultivated crop plants and they help plants in phosphorus nutrition and protecting them against biotic and abi…	Rejected	Review
MYB' + 'gene express'+ 'drought stress' + ' plants'+ 'PGPR'	Google scholar	Wheat Production in Changing Environments	Lastochkina et al., 2019		Rejected	Book
MYB' + 'gene express'+ 'drought stress' + ' plants'+ 'PGPR'	Google scholar	Trichoderma-Plant Root Colonization: Escaping Early Plant Defense Responses and Activation of the Antioxidant Machinery for Saline Stress Tolerance	Brotman et al., 2013	Trichoderma spp. are versatile opportunistic plant symbionts which can colonize the apoplast of plant roots. Microarrays analysis of Arabidopsis thaliana roots inoculated with Trichoderma asperelloides T203, coupled with qPCR analysis of 137 stress responsive genes and transcription factors, revealed wide gene transcript reprogramming, proceeded by a transient repression of the plant immune respo…	Rejected	Fungi
MYB' + 'gene express'+ 'drought stress' + ' plants'+ 'PGPR'	Google scholar	Isolation, functional characterization and efficacy of biofilm- forming rhizobacteria under abiotic stress conditions	Ansari et al., 2019	Abiotic stresses such as salinity, drought and excessive heat are associated with significant loss of crop productivity globally, and require effective strategies for their reduction or tolerance. Biofilm- forming rhizobacteria, which harbor multifarious plant growth promoting traits and tolerance to abiotic stress, are believed to benefit plant health and production even under environmental stre…	Rejected	No MYB
MYB' + 'gene express'+ 'drought stress' + ' plants'+ 'PGPR'	Google scholar	ACC deaminase producing plant growth promoting rhizobacteria enhance salinity stress tolerance in Pisum sativum	Gupta et al., 2021	Salinity stress is one of the most serious environmental stresses which limit plant growth, development and productivity. In this study, we screened 25 bacterial isolates based on the biochemical activity of ACC deaminase. Two potent PGPR namely Bacillus marisflavi (CHR JH 203) and Bacillus cereus (BST YS1_42) having the highest ACC deaminase (ACCD) activity were selected for further analyses suc…	Rejected	No MYB
MYB' + 'gene express'+ 'drought stress' + ' plants'+ 'PGPR'	Google scholar	Plant Growth-Promoting Bacteria: Biological Tools for the Mitigation of Salinity Stress in Plants	Kumar et al., 2020	Salinity stress is one of the major abiotic stresses threatening sustainable crop production worldwide. The extent of salinity affected area is expected to cover about 50% of total agricultural land by 2050. Salinity stress produces various detrimental effects on plants’ physiological, biochemical, and molecular features and reduces productivity. The poor plant growth under salinity stress is due…	Rejected	Review
MYB' + 'gene express'+ 'drought stress' + ' plants'+ 'PGPR'	Google scholar	Differential Effects of Pseudomonas mendocina and Glomus intraradices on Lettuce Plants Physiological Response and Aquaporin PIP2 Gene Expression Under Elevated Atmospheric CO2 and Drought	Mar Alguacil et al., 2009	Arbuscular mycorrhizal (AM) symbiosis and plant-growth-promoting rhizobacterium (PGPR) can allevi- ate the effects of water stress in plants, but it is unknown whether these benefits can be maintained at elevated CO2. Therefore, we carried out a study where seedlings of Lactuca sativa were inoculated with the AM fungus (AMF) Glomus intraradices N.C. Schenk & G.S. Sm. or the PGPR Pseudomonas mendo…	Rejected	Fungi
MYB' + 'gene express'+ 'drought stress' + ' plants'+ 'PGPR'	Google scholar	Interactive Role of Silicon and Plant–Rhizobacteria Mitigating Abiotic Stresses: A New Approach for Sustainable Agriculture and Climate Change	Verma et al., 2020	Abiotic stresses are the major constraints in agricultural crop production across the globe. The use of some plant–microbe interactions are established as an environment friendly way of enhancing crop productivity, and improving plant development and tolerance to abiotic stresses by direct or indirect mechanisms. Silicon (Si) can also stimulate plant growth and mitigate environmental stresses, an…	Rejected	Review
MYB' + 'gene express'+ 'drought stress' + ' plants'+ 'PGPR'	Google scholar	Plant-Microbe Interactions in Agro- Ecological Perspectives	Talaat et al., 2017		Rejected	Book
MYB' + 'gene express'+ 'drought stress' + ' plants'+ 'PGPR'	Google scholar	Regulation of plasma membrane aquaporins by inoculation with a Bacillus megaterium strain in maize (Zea mays L.) plants under unstressed and salt-stressed conditions	Marulanda et al., 2010	It is documented that some plant-growth- promoting rhizobacteria (PGPR) enhance plant salt toler- ance. However, as to how PGPR may inXuence two crucial components of plant salt tolerance such as, root hydraulic characteristics and aquaporin regulation has been almost unexplored. Here, maize (Zea mays L.) plants were inocu- lated with a Bacillus megaterium strain previously isolated from a degrad…	Rejected	No MYB
MYB' + 'gene express'+ 'drought stress' + ' plants'+ 'PGPR'	Google scholar	Amelioration of Salinity Stress by PGPR: ACC Deaminase and ROS Scavenging Enzymes Activity	Bharti et al., 2019		Rejected	Chapter book
MYB' + 'gene express'+ 'drought stress' + ' plants'+ 'PGPR'	Google scholar	An Update on Biotechnological Approaches for Improving Abiotic Stress Tolerance in Tomato	Pandey et al., 2011	Tomato (Solanum lycopersicum L.) is the sec- ond most important vegetable crop in the world after potato (Solanum tuberosum L.), and its productivity is influenced by different abiotic stresses. Though cultivated tomato is moder- ately tolerant to various abiotic stresses, the crop losses due to unfavorable environmental conditions can be unpredictably severe. So far, several efforts have been ma…	Rejected	Review
MYB' + 'gene express'+ 'drought stress' + ' plants'+ 'PGPR'	Google scholar	Transcriptional profiling reveals that a MYB transcription factor MsMYB4 contributes to the salinity stress response of alfalfa	Dong et al., 2018	MYB transcription factors are important regulators of the plant response to abiotic stress. Their participation in the salinity stress of the key forage legume species alfalfa (Medicago sativa) was investigated here by comparing the transcriptomes of the two cultivars Dryland (DL) and Sundory (SD), which differed with respect to their ability to tolerate salinity stress. When challenged by the st…	Rejected	No PGPR
MYB' + 'gene express'+ 'drought stress' + ' plants'+ 'PGPR'	Google scholar	Effect of plant growth promoting Pseudomonas spp. on compatible solutes, antioxidant status and plant growth of maize under drought stress	Sandhya et al., 2010	Drought is one of the major abiotic stresses affecting yield of dryland crops. Rhizobacterial populations of stressed soils are adapted and tolerant to stress and can be screened for isolation of efficient stress adaptive/toler- ant, plant growth promoting rhizobacterial (PGPR) strains that can be used as inoculants for crops grown in stressed ecosystems. The effect of inoculation of five drought…	Rejected	No MYB
MYB' + 'gene express'+ 'drought stress' + ' plants'+ 'PGPR'	Google scholar	Plant Performance Under Environmental Stress	Sen et al., 2021		Rejected	Book
MYB' + 'gene express'+ 'drought stress' + ' plants'+ 'PGPR'	Google scholar	Wheat Production in Changing Environments	Tounsi et al., 2019		Rejected	Book
MYB' + 'gene express'+ 'drought stress' + ' plants'+ 'PGPR'	Google scholar	Molecular Basis of Endophytic Bacillus megaterium-induced Growth Promotion in Arabidopsis thaliana: Revelation by Microarray-based Gene Expression Analysis	Vibhuti et al., 2016	Black pepper root endophytic Bacillus mega- terium BP17 (BmBP17) displayed excellent antagonistic activity against diverse plant pathogens. BmBP17 endo- phytically colonized plantlets of Arabidopsis with signifi- cant growth promotion as exemplified by increased root and shoot length. To elucidate the molecular basis of growth promotion, microarray-based gene expression pro- filing was performed …	Rejected	No Abiotic stress
MYB' + 'gene express'+ 'drought stress' + ' plants'+ 'PGPR'	Google scholar	Phytohormones and their metabolic engineering for abiotic stress tolerance in crop plants	Wani et al., 2016	Abiotic stresses including drought, salinity, heat, cold, flooding, and ultraviolet radiation causes crop losses worldwide. In recent times, preventing these crop losses and producing more food and feed to meet the demands of ever-increasing human populations have gained unprecedented importance. However, the proportion of agricultural lands facing multiple abiotic stresses is expected only to ri…	Rejected	Review
MYB' + 'gene express'+ 'drought stress' + ' plants'+ 'PGPR'	Google scholar	Plant phenolics: Recent advances on their biosynthesis, genetics, and ecophysiology	Cheynier et al., 2013	Land-adapted plants appeared between about 480 and 360 million years ago in the mid-Palaeozoic era, originating from charophycean green algae. The successful adaptation to land of these prototypes of amphibious plants e when they emerged from an aquatic environment onto the land e was achieved largely by massive formation of “phenolic UV light screens”. In the course of evolution, plants have dev…	Rejected	Review
MYB' + 'gene express'+ 'drought stress' + ' plants'+ 'PGPR'	Google scholar	Evaluation of Pseudomonas sp. for its multifarious plant growth promoting potential and its ability to alleviate biotic and abiotic stress in tomato (Solanum lycopersicum) plants	Pandey et al., 2020	1-Aminocyclopropane-1-carboxylate (ACC) deaminase activity is one of the most beneficial traits of plant growth promoting (PGP) rhizobacteria responsible for protecting the plants from detrimental effects of abiotic and biotic stress. The strain S3 with ACC deaminase activity (724.56 nmol α-ketobutyrate mg−1 protein hr−1) was isolated from rhizospheric soil of turmeric (Curcuma longa), a medicina…	Rejected	No MYB
MYB' + 'gene express'+ 'drought stress' + ' plants'+ 'PGPR'	Google scholar	Exploring plant rhizobacteria synergy to mitigate abiotic stress: a new dimension toward sustainable agriculture	Prakash et al., 2020		Rejected	Chapter book
MYB' + 'gene express'+ 'drought stress' + ' plants'+ 'PGPR'	Google scholar	Characterization of the Nrt2.6 Gene in Arabidopsis thaliana: A Link with Plant Response to Biotic and Abiotic Stress	Dechorgnat et al., 2012	The high affinity nitrate transport system in Arabidopsis thaliana involves one gene and potentially seven genes from the NRT1 and NRT2 family, respectively. Among them, NRT2.1, NRT2.2, NRT2.4 and NRT2.7 proteins have been shown to transport nitrate and are localized on the plasmalemma or the tonoplast membranes. NRT2.1, NRT2.2 and NRT2.4 play a role in nitrate uptake from soil solution by root c…	Rejected	No PGPR
MYB' + 'gene express'+ 'drought stress' + ' plants'+ 'PGPR'	Google scholar	Potential of plant growth-promoting rhizobacteria-plant interactions in mitigating salt stress for sustainable agriculture: A review	Kumawat et al., 2020	Soil salinization affecting different crops is one of the serious threats to global food security. Soil salinity affects 20% and 33% of the total cultivated and irrigated agricultural lands, respectively, and has been reported to caused a global crop production loss of 27.3 billion USD. The conventional approaches, such as using salt-tolerant varieties, saline soil scrapping, flushing, leaching, …	Rejected	Review
MYB' + 'gene express'+ 'drought stress' + ' plants'+ 'PGPR'	Google scholar	Transcriptome Analysis of Induced Systemic Drought Tolerance Elicited by Pseudomonas chlororaphis O6 in Arabidopsis thaliana	Cho et al., 2013	Root colonization by Pseudomonas chlororaphis O6 induces systemic drought tolerance in Arabidopsis thaliana. Microarray analysis was performed using the 22,800- gene Affymetrix GeneChips to identify differentially- expressed genes from plants colonized with or without P. chlororaphis O6 under drought stressed conditions or normal growth conditions. Root colonization in plants grown under regular …	Accepted
MYB' + 'gene express'+ 'drought stress' + ' plants'+ 'PGPR'	Google scholar	Nitrogen fertility and abiotic stresses management in cotton crop: a review	Khan et al., 2017	This review outlines nitrogen (N) responses in crop production and potential management decisions to ameliorate abiotic stresses for better crop production. N is a primary constituent of the nucleotides and proteins that are essential for life. Production and application of N fertilizers consume huge amounts of energy, and excess is detrimental to the environment. Therefore, increasing plant N us…	Rejected	Review
MYB' + 'gene express'+ 'drought stress' + ' plants'+ 'PGPR'	Google scholar	Physiological and molecular changes in plants grown at low temperatures	Theocharis et al., 2012	Apart from water availability, low temperature is the most important environmental factor limiting the productivity and geographical distribution of plants across the world. To cope with cold stress, plant species have evolved several physiological and molecular adaptations to maximize cold tolerance by adjusting their metabolism. The regulation of some gene products represents an addi- tional me…	Rejected	Review
MYB' + 'gene express'+ 'drought stress' + ' plants'+ 'PGPR'	Google scholar	Microbial inoculation in rice regulates antioxidative reactions and defense related genes to mitigate drought stress	Singh et al., 2020	Microbial inoculation in drought challenged rice triggered multipronged steps at enzymatic, non- enzymatic and gene expression level. these multifarious modulations in plants were related to stress tolerance mechanisms. Drought suppressed growth of rice plants but inoculation with Trichoderma, Pseudomonas and their combination minimized the impact of watering regime. induced PAL gene expression a…	Rejected	No MYB
MYB' + 'gene express'+ 'drought stress' + ' plants'+ 'PGPR'	Google scholar	Bacillus amyloliquefaciens inoculation alters physiology of rice (Oryza sativa L. var. IR-36) through modulating carbohydrate metabolism to mitigate stress induced by nutrient starvation	Bisht et al., 2020	To avoid disproportionate usage of chemicals in agriculture, an alternative eco-friendly strategy is required to im- prove soil fertility, and enhance crop productivity. Therefore, the present study demonstrates the role of plant beneficial rhizobacteria viz., Paenibacillus lentimorbus B-30488 (B-30488), Bacillus amyloliquefaciens SN13 (SN13), and their consortium in rice (Oryza sativa L. var. IR…	Rejected	No MYB
MYB' + 'gene express'+ 'drought stress' + ' plants'+ 'PGPR'	Google scholar	Seed priming for abiotic stress tolerance: an overview	Jisha et al., 2013	Plants are exposed to any number of potentially adverse environmental conditions such as water deficit, high salinity, extreme temperature, submergence, etc. These abiotic stresses adversely affect the plant growth and pro- ductivity. Nowadays various strategies are employed to generate plants that can withstand these stresses. In recent years, seed priming has been developed as an indispensable …	Rejected	Review
MYB' + 'gene express'+ 'drought stress' + ' plants'+ 'PGPR'	Google scholar	microRNA 166: an evolutionarily conserved stress biomarker in land plants targeting HD-ZIP family	Yadav et al., 2021	MicroRNAs (miRNAs) are significant class of noncoding RNAs having analytical investigating and modulatory roles in various signaling mechanisms in plants related to growth, development and environmental stress. Conserved miRNAs are an affirmation of land plants evolution and adaptation. They are a proof of indispensable roles of endogenous gene modulators that mediate plant survival on land. Out …	Rejected	Review
MYB' + 'gene express'+ 'drought stress' + ' plants'+ 'PGPR'	Google scholar	Identification of drought responsive Elaeis guineensis WRKY transcription factors with sensitivity to other abiotic stresses and hormone treatments	Lee et al., 2022	Background: The ability of plants to withstand and thrive in an adverse environment is crucial to ensure their surviv‐ ability and yield performance. The WRKY transcription factors (TFs) have crucial roles in plant growth, development and stress response, particularly drought stress. In oil palm, drought is recognized as one of the major yield limiting factors. However, the roles of WRKY TFs in t…	Rejected	No MYB
MYB' + 'gene express'+ 'drought stress' + ' plants'+ 'PGPR'	Google scholar	Role of ACC deaminase producing bacteria for abiotic stress management and sustainable agriculture production	Chandwani et al., 2022	Plants are immobile and are exposed to various biotic and abiotic stresses, including heat, cold, drought, flooding, nutrient deficiency, heavy metal exposure, phytopathogens, and pest attacks. The stressors significantly affect agricultural productivity when exceed a certain threshold. It has been reported that most of the stressed plants are reported to have increased ethylene synthesis from it…	Rejected	Review
MYB' + 'gene express'+ 'drought stress' + ' plants'+ 'PGPR'	Google scholar	Plant Growth Promoting Rhizobacteria, Arbuscular Mycorrhizal Fungi and Their Synergistic Interactions to Counteract the Negative Effects of Saline Soil on Agriculture: Key Macromolecules and Mechanisms	Sagar et al., 2021	Soil saltiness is a noteworthy issue as it results in loss of profitability and development of agrarian harvests and decline in soil health. Microorganisms associated with plants contribute to their growth promotion and salinity tolerance by employing a multitude of macromolecules and pathways. Plant growth promoting rhizobacteria (PGPR) have an immediate impact on improving profitability based o…	Rejected	Review
MYB' + 'gene express'+ 'drought stress' + ' plants'+ 'PGPR'	Google scholar	Plant growth promoting rhizobacteria are more effective under drought: a meta-analysis	Rubin et al., 2017	Background and aims Plant growth promoting rhizobacteria (PGPR) have been shown to reduce abiotic stress on plants, but these effects have not been quantitatively synthesized. We evaluated the degree to which plant growth promoting rhizobacteria (PGPR) improve plant performance with and without drought stress. Methods We used meta-analysis to summarize 52 pub- lished articles on the effects of PG…	Rejected	Meta-analysis
MYB' + 'gene express'+ 'drought stress' + ' plants'+ 'PGPR'	Google scholar	The walnut JrVHAG1 gene is involved in cadmium stress response through ABA-signal pathway and MYB transcription regulation	Xu et al., 2018	Background: Vacuolar H+-ATPase (V-ATPase) is a vital protein complex involved in abiotic stress response in plants. The G subunit of Juglans regia (JrVHAG1) was previously identified as a drought tolerance-related gene involved in the ABA (abscisic acid)-signal pathway. Heavy metal stress is becoming a major detriment for plant growth, development, and production. In order to understand the role …	Rejected	No PGPR
MYB' + 'gene express'+ 'drought stress' + ' plants'+ 'PGPR'	Google scholar	Plant-Microbe Interactions in Alleviating Abiotic Stress—A Mini Review	Inbaraj et al., 2021	Crop plants are continuously exposed to various abiotic stresses like drought, salinity, ultraviolet radiation, low and high temperatures, flooding, metal toxicities, nutrient deficiencies which act as limiting factors that hampers plant growth and low agricultural productivity. Climate change and intensive agricultural practices has further aggravated the impact of abiotic stresses leading to a …	Rejected	Review
MYB' + 'gene express'+ 'drought stress' + ' plants'+ 'PGPR'	Google scholar	In Silico Study of the RSH (RelA/SpoT Homologs) Gene Family and Expression Analysis in Response to PGPR Bacteria and Salinity in Brassica napus	Dabrowska et al., 2021	Among several mechanisms involved in the plant stress response, synthesis of guanosine tetra and pentaphosphates (alarmones), homologous to the bacterial stringent response, is of crucial importance. Plant alarmones affect, among others, photosynthetic activity, metabolite accumulation, and nutrient remobilization, and thus regulate plant growth and development. The plant RSH (RelA/SpoT homolog) …	Rejected	No drought stress
MYB' + 'gene express'+ 'drought stress' + ' plants'+ 'PGPR'	Google scholar	Jasmonic acid signalling and the plant holobiont	Carvalhais et al., 2017	The plant holobiont – which is the plant and its associated microbiome – is increasingly viewed as an evolving entity. Some interacting microbes that compose the microbiome assist plants in combating pathogens and herbivorous insects. However, knowledge of the factors that influence the microbiome in the context of defence signalling pathways is still in its infancy. Recent research reported that…	Rejected	Review
MYB' + 'gene express'+ 'drought stress' + ' plants'+ 'PGPR'	Google scholar	Improved heat stress tolerance of wheat seedlings by bacterial seed treatment	Abd El-Daim et al., 2014	Aim To investigate if rhizosphere bacteria can improve heat tolerance of wheat. Methods Wheat (Triticum aestivum) seeds of the cultivars Olivin and Sids1 were treated with Bacillus amyloliquefaciens UCMB5113 or Azospirillum brasilense NO40 and young seedlings tested for management of short term heat stress. Results Bacterial treatment improved heat stress man- agement of wheat. Olivin showed high…	Rejected	No MYB
MYB' + 'gene express'+ 'drought stress' + ' plants'+ 'PGPR'	Google scholar	Bacillus licheniformis strain POT1 mediated polyphenol biosynthetic pathways genes activation and systemic resistance in potato plants against Alfalfa mosaic virus	Abdelkhalek et al., 2020	Alfalfa mosaic virus (AMV) is a worldwide distributed virus that has a very wide host range and causes significant crop losses of many economically important crops, including potato (Solanum tuberosum L.). in this study, the antiviral activity of Bacillus licheniformis strain POT1 against AMV on potato plants was evaluated. The dual foliar application of culture filtrate (CF), 24 h before and aft…	Rejected	Biotic stress
MYB' + 'gene express'+ 'drought stress' + ' plants'+ 'PGPR'	Google scholar	Sustainable agriculture in Africa: Plant growth-promoting rhizobacteria (PGPR) to the rescue	Adedeji et al., 2020	The continued increase in the world’s population is expected to make global food avail- ability as one of the major concerns of our future. Nowhere are the concerns greater than in Africa. With a poor economy, the continent is expected to be home to many people in the next few years. Today, agriculture is faced with critical challenges of land degradation, reduced productivity, and susceptibility…	Rejected	Review
MYB' + 'gene express'+ 'drought stress' + ' plants'+ 'PGPR'	Google scholar	Revisiting the plant growth‐promoting rhizobacteria: lessons from the past and objectives for the future	Aeron et al., 2020	Plant beneficial rhizobacteria (PBR) is a group of naturally occurring rhizospheric microbes that enhance nutrient avail- ability and induce biotic and abiotic stress tolerance through a wide array of mechanisms to enhance agricultural sustain- ability. Application of PBR has the potential to reduce worldwide requirement of agricultural chemicals and improve agro-ecological sustainability. The PB…	Rejected	Review
MYB' + 'gene express'+ 'drought stress' + ' plants'+ 'PGPR'	Google scholar	Role of Mineral Nutrients in Abiotic Stress Tolerance: Revisiting the Associated Signaling Mechanisms	Ahanger et al., 2019		Rejected	Chapter book
MYB' + 'gene express'+ 'drought stress' + ' plants'+ 'PGPR'	Google scholar	Isolated Bacillus subtilis strain 330-2 and its antagonistic genes identified by the removing PCR	Ahmad et al., 2017	Plant growth-promoting bacteria (PGPB) may trigger tolerance against biotic/abiotic stresses and growth enhancement in plants. In this study, an endophytic bacterial strain from rapeseed was isolated to assess its role in enhancing plant growth and tolerance to abiotic stresses, as well as banded leaf and sheath blight disease in maize. Based on 16S rDNA and BIOLOG test analysis, the 330-2 strain…	Rejected	No Abiotic stress
MYB' + 'gene express'+ 'drought stress' + ' plants'+ 'PGPR'	Google scholar	Induced transcriptional profiling of phenylpropanoid pathway genes increased flavonoid and lignin content in Arabidopsis leaves in response to microbial products	Ali et al., 2014	Background: The production and use of biologically derived soil additives is one of the fastest growing sectors of the fertilizer industry. These products have been shown to improve crop yields while at the same time reducing fertilizer inputs to and nutrient loss from cropland. The mechanisms driving the changes in primary productivity and soil processes are poorly understood and little is known…	Rejected	No Abiotic stress
MYB' + 'gene express'+ 'drought stress' + ' plants'+ 'PGPR'	Google scholar	Implications of Abscisic Acid in the Drought Stress Tolerance of Plants	Ali et al., 2020	Drought is a severe environmental constraint, which significantly affects plant growth, productivity, and quality. Plants have developed specific mechanisms that perceive the stress signals and respond to external environmental changes via different mitigation strategies. Abscisic acid (ABA), being one of the phytohormones, serves as an important signaling mediator for plants’ adaptive response t…	Rejected	Review
MYB' + 'gene express'+ 'drought stress' + ' plants'+ 'PGPR'	Google scholar	Plant Growth Promoting Rhizobacteria for Agricultural Sustainability	Ambreetha et al., 2019		Rejected	Book
MYB' + 'gene express'+ 'drought stress' + ' plants'+ 'PGPR'	Google scholar	Microbial Interventions in Agriculture and Environment	Ansari et al., 2019		Rejected	Book
MYB' + 'gene express'+ 'drought stress' + ' plants'+ 'PGPR'	Google scholar	Pseudomonas azotoformans FAP5, a novel biofilm‐forming PGPR strain, alleviates drought stress in wheat plant	Ansari et al., 2021	Drought ranks among the most severe environmental stressors that adversely affect crop productivity. Use of stress-tolerant plant growth-promoting rhizobacteria (PGPR) is expected to ameliorate the drought stress in plants. Therefore, in this study, a novel strain, Pseudomonas azotoformans FAP5 with multifunctional traits was obtained from screening of 50 indigenous isolates. The criteria for sel…	Rejected	No MYB
MYB' + 'gene express'+ 'drought stress' + ' plants'+ 'PGPR'	Google scholar	Elucidating the Response of Crop Plants towards Individual, Combined and Sequentially Occurring Abiotic Stresses	Anwar et al., 2021	In nature, plants are exposed to an ever-changing environment with increasing frequen- cies of multiple abiotic stresses. These abiotic stresses act either in combination or sequentially, thereby driving vegetation dynamics and limiting plant growth and productivity worldwide. Plants’ responses against these combined and sequential stresses clearly differ from that triggered by an indi- vidual st…	Rejected	Review
MYB' + 'gene express'+ 'drought stress' + ' plants'+ 'PGPR'	Google scholar	Uncovering the role of melatonin in plant stress tolerance	Ayyaz et al., 2022	In recent years, melatonin has emerged as a popular research topic in the field of plant biology. Since melatonin is implicated in numerous plant developmental processes and stress responses, the exploration of its roles in regulating various physiological and biochemical processes contributing to plant growth and development under normal or stress conditions has become a rapidly progressing fiel…	Rejected	Review
MYB' + 'gene express'+ 'drought stress' + ' plants'+ 'PGPR'	Google scholar	Microorganisms in Saline Environments: Strategies and Functions	Banerjee et al., 2019		Rejected	Book
MYB' + 'gene express'+ 'drought stress' + ' plants'+ 'PGPR'	Google scholar	Comparison of the transcriptomes of American chestnut (Castanea dentata) and Chinese chestnut (Castanea mollissima) in response to the chestnut blight infection	Barakat et al., 2009	Background1471-2229-9-51: American chestnut (Castanea dentata) was devastated by an exotic pathogen in the beginning of the twentieth century. This chestnut blight is caused by Cryphonectria parasitica, a fungus that infects stem tissues and kills the trees by girdling them. Because of the great economic and ecological value of this species, significant efforts have been made over the century to …	Rejected	Biotic stress
MYB' + 'gene express'+ 'drought stress' + ' plants'+ 'PGPR'	Google scholar	Microbial Metatranscriptomics Belowground	Barooah et al., 2021.		Rejected	Book
MYB' + 'gene express'+ 'drought stress' + ' plants'+ 'PGPR'	Google scholar	Antioxidants in Plant-Microbe Interaction	Baruah et al., 2021		Rejected	Book
MYB' + 'gene express'+ 'drought stress' + ' plants'+ 'PGPR'	Google scholar	Plant Growth-Promoting Microbes for Sustainable Biotic and Abiotic Stress Management	Basit et al., 2021		Rejected	Book
MYB' + 'gene express'+ 'drought stress' + ' plants'+ 'PGPR'	Google scholar	Biofertilizers function as key player in sustainable agriculture by improving soil fertility, plant tolerance and crop productivity	Bhardwaj et al., 2014	Current soil management strategies are mainly dependent on inorganic chemical-based fertilizers, which caused a serious threat to human health and environment. The exploitation of beneficial microbes as a biofertilizer has become paramount importance in agriculture sector for their potential role in food safety and sustainable crop production. The eco-friendly approaches inspire a wide range of a…	Rejected	Review
MYB' + 'gene express'+ 'drought stress' + ' plants'+ 'PGPR'	Google scholar	Plants Saline Environment in Perception with Rhizosphere Bacteria Containing 1-Aminocyclopropane-1-Carboxylate Deaminase	Bomle et al., 2021	Soil salinity stress has become a serious roadblock for food production worldwide since it is one of the key factors affecting agricultural productivity. Salinity and drought are predicted to cause considerable loss of crops. To deal with this difficult situation, a variety of strategies have been developed, including plant breeding, plant genetic engineering, and a wide range of agricultural pra…	Rejected	Review
MYB' + 'gene express'+ 'drought stress' + ' plants'+ 'PGPR'	Google scholar	Amelioration of chromium and heat stresses in Sorghum bicolor by Cr6þ reducing-thermotolerant plant growth promoting bacteria	Bruno et al., 2020	Climatic factors particularly increased atmospheric temperature (IAT) greatly alters plant microbe and heavy metal interactions and subsequently reduces plant growth and phytoremediation efficiency. The aim of the study was to assess the effects of inoculation of chromium reducing-thermotolerant plant growth promoting bacteria (CRT-PGPB) on plant growth, physiological responses and chromium (Cr) …	Rejected	No MYB
MYB' + 'gene express'+ 'drought stress' + ' plants'+ 'PGPR'	Google scholar	Plant growth-promoting rhizobacteria induce changes in Arabidopsis thaliana gene expression of nitrate and ammonium uptake genes	Calvo et al., 2019	Plant growth-promoting rhizobacteria (PGPR) enhance plant growth under the influence of multigenic processes, including nitrate (NO−3 ) and ammonium (NH+4 ) uptake genes, which could potentially explain the improvement in plant nutrition and plant growth promotion. Studies on the effects of PGPR inoculation on regulation of NO−3 and NH+4 plant uptake genes and nutrient accumulation using soil or …	Rejected	No MYB
MYB' + 'gene express'+ 'drought stress' + ' plants'+ 'PGPR'	Google scholar	Physiological and Agronomical Aspects of Phytohormone Production by Model Plant-Growth-Promoting Rhizobacteria (PGPR) Belonging to the Genus Azospirillum	Cassan et al., 2014	The functional analysis of phytohormone pro- duction, interaction, and regulation in higher plants has re- emerged in the past 10 years due to spectacular advances in integrative study models. However, plants are not axenic in natural conditions and are usually colonized or influenced directly by different microorganisms such as rhizobacteria of which many have the ability to produce phytohormone…	Rejected	Review
MYB' + 'gene express'+ 'drought stress' + ' plants'+ 'PGPR'	Google scholar	Biochemical Responses of Wheat Plants Primed with Ochrobactrum pseudogrignonense and Subjected to Salinity Stress	Chakraborty et al., 2019	A large number of bacteria were isolated from the rhizosphere of Imperata cylindrica, a facultative halophyte, and the most tolerant one with an ability to grow under 10% sodium chloride in vitro was selected and designated as IP8. This was identified to be Ochrobactrum pseudogrignonense on the basis of 16SrDNA analysis and showed positive plant- growth-promoting traits in vitro. Growth of wheat …	Rejected	No MYB
MYB' + 'gene express'+ 'drought stress' + ' plants'+ 'PGPR'	Google scholar	Isolation and molecular characterization of plant growth-promoting Bacillus spp. and their impact on sugarcane (Saccharum spp. hybrids) growth and tolerance towards drought stress	Chandra et al., 2018	Plant growth-promoting rhizobacteria (PGPR) have demonstrated its importance in agriculture globally including beneficial dynamics change in plant rhizosphere leading better tolerance towards abiotic stresses. Hundred and one bacterial cultures from sugarcane rhizosphere zone of > 50 years of sugarcane growing fields were isolated using standard protocols and were further subjected to in vitro sc…	Rejected	No MYB
MYB' + 'gene express'+ 'drought stress' + ' plants'+ 'PGPR'	Google scholar	Biotechnological perspectives of microbes in agro-ecosystems	Choudhary et al., 2011	In subsistence agricultural systems, crop yields are directly dependent on the inherent soil fertility and on microbial processes that govern the mineralization and mobilization of nutrients required for plant growth. An impact of different crop species that are used in various combinations is likely to be an important factor in determining the structure of plant beneficial microbial communities …	rejected	Review
MYB' + 'gene express'+ 'drought stress' + ' plants'+ 'PGPR'	Google scholar	Microbial rescue to plant under habitat-imposed abiotic and biotic stresses	Choudhary et al., 2012	Habitat-imposed abiotic and biotic stress is a serious condition and is also a land-degradation problem in arid and semi-arid regions, causing major problem for crop productivity. Most of the cultivable and a least half of irrigated lands around the world are severely affected by environmental stresses. However, in these conditions, there are plant populations suc- cessfully adapted and evolution…	rejected	Review
MYB' + 'gene express'+ 'drought stress' + ' plants'+ 'PGPR'	Google scholar	Molecular aspects of defence priming	Conrath et al., 2011	Plants can be primed for more rapid and robust activation of defence to biotic or abiotic stress. Priming follows perception of molecular patterns of microbes or plants, recognition of pathogen-derived effectors or colonisation by beneficial microbes. However the process can also be induced by treatment with some natural or synthetic compounds and wounding. The primed mobilization of defence is o…	Rejected	Review
MYB' + 'gene express'+ 'drought stress' + ' plants'+ 'PGPR'	Google scholar	Unearthing the Plant Growth- Promoting Traits of Bacillus megaterium RmBm31, an Endophytic Bacterium Isolated From Root Nodules of Retama monosperma	Dahmani et al., 2020	Plants live in association with complex populations of microorganisms, including Plant Growth-Promoting Rhizobacteria (PGPR) that confer to plants an improved growth and enhanced stress tolerance. This large and diverse group includes endophytic bacteria that are able to colonize the internal tissues of plants. In the present study, we have isolated a nonrhizobial species from surface sterilized …	Rejected	No PGPR
MYB' + 'gene express'+ 'drought stress' + ' plants'+ 'PGPR'	Google scholar	Exogenous application of salicylic acid for regulation of sunflower growth under abiotic stress: a systematic review	Damalas et al., 2022	In the current review, peer-reviewed publications from the Web of Science and SCOPUS databases concerning the impact of exogenous application of salicylic acid (SA) on sunflower growth in stressful environments were analyzed. Nine studies reported that SA application improved sunflower growth under salinity stress by enhancing K+ uptake and depressing Na+ and Cl− in the plant, increasing the acti…	Rejected	Review
MYB' + 'gene express'+ 'drought stress' + ' plants'+ 'PGPR'	Google scholar	Plant growth-promoting rhizobacteria: Potential improvement in antioxidant defense system and suppression of oxidative stress for alleviating salinity stress in Triticum aestivum (L.) plants	Desoky et al., 2020	Plant growth-promoting rhizobacteria (PGPRs) can suppress salt stress effects and improve plant productivity. This study elucidated the mechanisms of growth medium-inoculated PGPRs (Bacillus cereus, Serratia marcescens, and Pseudomonas aeruginosa), which contribute to improving salinity tolerance in Triticum aestivum plants grown under two NaCl-salinity levels (150 and 300 mM). The objective was …	Rejected	No MYB
MYB' + 'gene express'+ 'drought stress' + ' plants'+ 'PGPR'	Google scholar	Bacillus amyloliquefaciens MBI600 differentially induces tomato defense signaling pathways depending on plant part and dose of application	Dimopoulou et al., 2019	The success of Bacillus amyloliquefaciens as a biological control agent relies on its ability to outgrow plant pathogens. It is also thought to interact with its plant host by inducing systemic resistance. In this study, the ability of B. amyloliquefaciens MBI600 to elicit defense (or other) responses in tomato seedlings and plants was assessed upon the expression of marker genes and transcriptom…	Rejected	No Abiotic stress
MYB' + 'gene express'+ 'drought stress' + ' plants'+ 'PGPR'	Google scholar	Plant root transcriptome profiling reveals a strain-dependent response during Azospirillum-rice cooperation	Drougue et al., 2014	Cooperation involving Plant Growth-Promoting Rhizobacteria results in improvements of plant growth and health. While pathogenic and symbiotic interactions are known to induce transcriptional changes for genes related to plant defense and development, little is known about the impact of phytostimulating rhizobacteria on plant gene expression. This study aims at identifying genes significantly regu…	Rejected	No Abiotic stress
MYB' + 'gene express'+ 'drought stress' + ' plants'+ 'PGPR'	Google scholar	Plant biostimulants: Definition, concept, main categories and regulation	du Jardin et al., 2015	A plant biostimulant is any substance or microorganism applied to plants with the aim to enhance nutri- tion efficiency, abiotic stress tolerance and/or crop quality traits, regardless of its nutrients content. By extension, plant biostimulants also designate commercial products containing mixtures of such sub- stances and/or microorganisms. The definition proposed by this article is supported by…	Rejected	Review
MYB' + 'gene express'+ 'drought stress' + ' plants'+ 'PGPR'	Google scholar	Growing more with less: Breeding and developing drought resilient soybean to improve food security	Dubey et al., 2019	Soybean (Glycine max L.) is considered an important crop, and enhancing its production under drought stress and changing climatic conditions to meet the challenges of global food security is crucial. Drought is considered one of the major abiotic factors that adversely affect soybean production. To address this challenge, we need to develop an integrative research approach that will bring togethe…	Rejected	Review
MYB' + 'gene express'+ 'drought stress' + ' plants'+ 'PGPR'	Google scholar	The Plant Family Fabaceae Biology and Physiological Responses to Environmental Stresses	Dubey et al., 2020		Rejected	Book
MYB' + 'gene express'+ 'drought stress' + ' plants'+ 'PGPR'	Google scholar	Delineation of mechanistic approaches of rhizosphere microorganisms facilitated plant health and resilience under challenging conditions	Dukare et al., 2022	Sustainable agriculture demands the balanced use of inorganic, organic, and microbial biofertilizers for enhanced plant productivity and soil fertility. Plant growth-enhancing rhizospheric bacteria can be an excellent biotechnological tool to augment plant productivity in different agricultural setups. We present an overview of microbial mechanisms which directly or indirectly contribute to plant…	Rejected	Review
MYB' + 'gene express'+ 'drought stress' + ' plants'+ 'PGPR'	Google scholar	Microbiome in Plant Health and Disease Challenges and Opportunities	Eid et al., 2019		Rejected	Book
MYB' + 'gene express'+ 'drought stress' + ' plants'+ 'PGPR'	Google scholar	Salt-Tolerant Plant Growth Promoting Rhizobacteria for Enhancing Crop Productivity of Saline Soils	Egamberdieva et al., 2019	Soil salinity has emerged as a serious issue for global food security. It is estimated that currently about 62 million hectares or 20 percent of the world’s irrigated land is affected by salinity. The deposition of an excess amount of soluble salt in cultivable land directly affects crop yields. The uptake of high amount of salt inhibits diverse physiological and metabolic processes of plants eve…	Rejected	Book
MYB' + 'gene express'+ 'drought stress' + ' plants'+ 'PGPR'	Google scholar	Role of plant-growth promoting fungi (PGPF) in defensive genes expression of Triticum aestivum against wilt disease	El-Maraghy et al., 2020	The utilization of appropriate preparations of plant growth-promoting fungi (PGPF) is one of the most promising trends for inducing plant resistance against a pathogen. However, not much is known about their mechanisms. Herein, the goal of this study was to present more information on this matter. The isolated rhizosphere fungi Aspergillus falvus, Aspergillus niger, Penicillium citrinum, Penicill…	Rejected	Biotic stress
MYB' + 'gene express'+ 'drought stress' + ' plants'+ 'PGPR'	Google scholar	Transcriptomic analysis reveals the importance of JA-Ile turnover in the response of Arabidopsis plants to plant growth promoting rhizobacteria and salinity	Erice et al., 2017	The use of plant growth promoting rhizobacteria (PGPR) is a proven management strategy to improve plant growth. The aim was to reveal the genomic and proteomic basis of the plant tolerance to saline soil conditions. Combination of whole transcriptome analysis and proteomic profiling helped further the understanding of the complexity of salt tolerance responses. Arabidopsis plants were grown inocu…	Rejected	No MYB
MYB' + 'gene express'+ 'drought stress' + ' plants'+ 'PGPR'	Google scholar	Profiling of ACC synthase gene (ACS11) expression in Arabidopsis induced by abiotic stresses	Eun et al., 2019	Abiotic stress induce the production of 1‐aminocyclopropane‐1‐carboxylate (ACC), the precursor of ethylene by activating the enzyme ACC synthase. There are twelve ACC synthase genes reported in the genome of Arabidopsis, and the ACC synthase 11 (ACS11) gene encodes a polypeptide that is functional; however, its involvement in ethylene biosynthesis in response to abiotic stresses remains unclear. …	Rejected	No PGPR
MYB' + 'gene express'+ 'drought stress' + ' plants'+ 'PGPR'	Google scholar	plant endophytes promote growth and alleviate salt stress in Arabidopsis thaliana	Fan et al., 2020	plant growth promoting rhizobacteria (pGpR) are a functionally diverse group of microbes having immense potential as biostimulants and stress alleviators. their exploitation in agro-ecosystems as an eco-friendly and cost-effective alternative to traditional chemical inputs may positively affect agricultural productivity and environmental sustainability. the present study describes selected rhizob…	Rejected	No MYB
MYB' + 'gene express'+ 'drought stress' + ' plants'+ 'PGPR'	Google scholar	Recent advances in physiological and molecular mechanisms of heavy metal accumulation in plants	Feki et al., 2021	Among abiotic stress, the toxicity of metals impacts negatively on plants’ growth and productivity. This toxicity promotes various perturbations in plants at different levels. To withstand stress, plants involve efficient mechanisms through the impli- cation of various signaling pathways. These pathways enhance the expression of many target genes among them gene coding for metal transporters. Var…	Rejected	Review
MYB' + 'gene express'+ 'drought stress' + ' plants'+ 'PGPR'	Google scholar	Trehalose metabolism is activated upon chilling in grapevine and might participate in Burkholderia phytofirmans induced chilling tolerance	Fernandez et al., 2012	During the last decade, there has been growing interest in the role of trehalose metabolism in tolerance to abiotic stress in higher plants, especially cold stress. So far, this metabolism has not yet been studied in Vitis vinifera L., despite the economic importance of this crop. The goal of this paper was to investigate the involvement of treha- lose metabolism in the response of grapevine to c…	Rejected	No MYB
MYB' + 'gene express'+ 'drought stress' + ' plants'+ 'PGPR'	Google scholar	The influence of endophytes on rice fitness under environmental stresses	Ganie et al., 2022	Rice (Oryza sativa) crop is continuously subjected to biotic and abiotic stresses, compromising growth and conse- quently yield. The situation is exacerbated by climate change impacting on ecosystems and biodiversity. Genetic engineering has been used to develop stress-tolerant rice, alongside physical and chemical methods to mitigate the effect of these stresses. However, the success of these st…	Rejected	Review
MYB' + 'gene express'+ 'drought stress' + ' plants'+ 'PGPR'	Google scholar	Application of Pseudomonas fluorescens to Blackberry under Field Conditions Improves Fruit Quality by Modifying Flavonoid Metabolism	Garcia-Seco et al., 2015	Application of a plant growth promoting rhizobacterium (PGPR), Pseudomonas fluorescens N21.4, to roots of blackberries (Rubus sp.) is part of an optimised cultivation practice to improve yields and quality of fruit throughout the year in this important fruit crop. Blackber- ries are especially rich in flavonoids and therefore offer potential benefits for human health in prevention or amelioration…	Rejected	No Abiotic stress
MYB' + 'gene express'+ 'drought stress' + ' plants'+ 'PGPR'	Google scholar	Indigenous rhizobacteria possessing abiotic stress tolerant traits promote vigorous growth of coconut seedlings via increased nutrient uptake and positive plant–microbe feedback	George et al., 2022	A total of 20 bacteria including seven fluorescent Pseudomonas spp. and 13 Bacillus spp., out of 483 previously isolated bacteria from rhizosphere and roots of healthy and high yielding coconut palms from major coconut growing States in India, were tested for their growth promotion efficacy on West Coast Tall variety coconut seedlings. Firstly, they were characterized for (i) ability to grow unde…	Rejected	No MYB
MYB' + 'gene express'+ 'drought stress' + ' plants'+ 'PGPR'	Google scholar	Root-targeted biotechnology to mediate hormonal signalling and improve crop stress tolerance	Ghanem et al., 2011	Since plant root systems capture both water and nutrients essential for the formation of crop yield, there has been renewed biotechnological focus on root system improvement. Although water and nutrient uptake can be facilitated by membrane proteins known as aquaporins and nutrient transporters, respectively, there is a little evidence that root-localised overexpression of these proteins improves…	Rejected	Review
MYB' + 'gene express'+ 'drought stress' + ' plants'+ 'PGPR'	Google scholar	Dynamics of endogenous hormone regulation in plants by phytohormone secreting rhizobacteria under water-stress	Ghosh et al., 2019	Although the physiological benefits of plant growth promoting rhizobacteria (PGPR) to plants are well known, the precise mechanisms that make these PGPR such wonderful friends of plants under adverse environmental conditions are still under investigation. We have previously reported that one such PGPR, Pseudomonas putida GAP-P45 ameliorates the adverse effects of water deficit in Arabidopsis thal…	Rejected	No MYB
MYB' + 'gene express'+ 'drought stress' + ' plants'+ 'PGPR'	Google scholar	The Impact of Beneficial Plant-Associated Microbes on Plant Phenotypic Plasticity	Goh et al., 2013	Plants show phenotypic plasticity in response to changing or extreme abiotic environments; but over millions of years they also have co-evolved to respond to the presence of soil microbes. Studies on phenotypic plasticity in plants have focused mainly on the effects of the changing environments on plants’ growth and survival. Evidence is now accumulating that the presence of microbes can alter pl…	Rejected	Review
MYB' + 'gene express'+ 'drought stress' + ' plants'+ 'PGPR'	Google scholar	Transcriptomics of Biostimulation of Plants Under Abiotic Stress	González-Morales et al., 2021	Plant biostimulants are compounds, living microorganisms, or their constituent parts that alter plant development programs. The impact of biostimulants is manifested in several ways: via morphological, physiological, biochemical, epigenomic, proteomic, and transcriptomic changes. For each of these, a response and alteration occur, and these alterations in turn improve metabolic and adaptive perfo…	Rejected	Review
MYB' + 'gene express'+ 'drought stress' + ' plants'+ 'PGPR'	Google scholar	PGPR-Biotechnology for Management of Abiotic and Biotic Stresses in Crop Plants	Govindasamy et al., 2008	Soil microbial populations are immersed in a framework of interactions, which are known to affect plant fitness and soil quality. The bacteria that provide some benefit to plants are of either symbiotic types or free-living in the soil. Beneficial free-living bacteria in the plant rhizosphere are usually referred as plant growth promoting rhizobacteria (PGPR) which promote the plant growth by mea…	Rejected	Chapter book
MYB' + 'gene express'+ 'drought stress' + ' plants'+ 'PGPR'	Google scholar	Rhizospheric Microbial Diversity: An Important Component for Abiotic Stress Management in Crop Plants Toward Sustainable Agriculture	Goyal et al., 2019		Rejected	Chapter book
MYB' + 'gene express'+ 'drought stress' + ' plants'+ 'PGPR'	Google scholar	Root hydraulic conductance, aquaporins and plant growth promoting microorganisms: A revision	Groppa et al., 2012	A considerable number of soil and rhizospheric fungi and bacteria collectively known as plant growth pro- moting microorganisms (PGPM) have demonstrated ability to colonize plant roots and to provide benefits to their hosts. Among these benefits, many authors documented improved root hydraulic conductance and alleviation of abiotic stresses such as drought and salinity. Today, it is accepted that…	Rejected	Review
MYB' + 'gene express'+ 'drought stress' + ' plants'+ 'PGPR'	Google scholar	Screening of Salt Stress Responsive Genes in Brachypodium distachyon (L.) Beauv. by Transcriptome Analysis	Guo et al., 2020	As one of the most common abiotic stresses, salt stress seriously impairs crop yield. Brachypodium distachyon (L.) Beauv. is a model species for studying wheat and other grasses. In the present investigation, the physiological responses of B. distachyon treated with different concentrations of NaCl for 24 h were measured. Therefore, the control and the seedlings of B. distachyon treated with 200 …	Rejected	No PGPR
MYB' + 'gene express'+ 'drought stress' + ' plants'+ 'PGPR'	Google scholar	Plant Growth-Promoting Rhizobacteria Enhance Salinity Stress Tolerance in Okra through ROS-Scavenging Enzymes	Habib et al., 2016	Salinity is a major environmental stress that limits crop production worldwide. In this study, we characterized plant growth- promoting rhizobacteria (PGPR) containing 1-aminocyclopropane-1-carboxylate (ACC) deaminase and examined their effect on salinity stress tolerance in okra through the induction of ROS-scavenging enzyme activity. PGPR inoculated okra plants exhibited higher germination perc…	Rejected	No MYB
MYB' + 'gene express'+ 'drought stress' + ' plants'+ 'PGPR'	Google scholar	Bacterial Plant Biostimulants: A Sustainable Way towards Improving Growth, Productivity, and Health of Crops	Hamid et al., 2021	This review presents a comprehensive and systematic study of the field of bacterial plant biostimulants and considers the fundamental and innovative principles underlying this technology. Plant biostimulants are an important tool for modern agriculture as part of an integrated crop man- agement (ICM) system, helping make agriculture more sustainable and resilient. Plant biostimulants contain subs…	Rejected	Review
MYB' + 'gene express'+ 'drought stress' + ' plants'+ 'PGPR'	Google scholar	Biochar mediates systemic response of strawberry to foliar fungal pathogens	Harel et al., 2012	Background and Aims Various biochars added to soil have been shown to improve plant performance. Moreover, a wood biochar was found to induce tomato and pepper plant systemic resistance to two foliar fungal pathogens. The aim of this study was to explore the ability of wood biochar and greenhouse waste biochar to induce systemic resistance in strawberry plants against Botrytis cinerea, Colletotri…	Rejected	Biotic stress
MYB' + 'gene express'+ 'drought stress' + ' plants'+ 'PGPR'	Google scholar	Halotolerant Plant Growth‐Promoting Rhizobacteria Induce Salinity Tolerance in Wheat by Enhancing the Expression of SOS Genes	Haroon et al., 2022	Soil salinity is one of the main yield-limiting factors in various crops. Under different environmental stresses, many rhizo- bacteria have demonstrated encouraging role in enhancing plant growth and tolerate stress conditions. In this study, three potential 1-aminocyclopropane-1-carboxylic acid (ACC) deaminase- and exopolysaccharides (EPS)-secreting bacterial strains including Bacillus megateriu…	Rejected	No MYB
MYB' + 'gene express'+ 'drought stress' + ' plants'+ 'PGPR'	Google scholar	Engineering rhizobacteria for sustainable agriculture	Haskett et al., 2021	Exploitation of plant growth promoting (PGP) rhizobacteria (PGPR) as crop inoculants could propel sustainable intensification of agriculture to feed our rapidly growing population. However, field performance of PGPR is typically inconsistent due to suboptimal rhizosphere colonisation and persistence in foreign soils, promiscuous host-specificity, and in some cases, the existence of undesirable ge…	Rejected	Review
MYB' + 'gene express'+ 'drought stress' + ' plants'+ 'PGPR'	Google scholar	Biological Control Activity of Plant Growth Promoting Rhizobacteria Burkholderia contaminans AY001 against Tomato Fusarium Wilt and Bacterial Speck Diseases	Heo et al., 2022	Burkholderia contaminans belongs to B. cepacia complex (Bcc), those of which are found in various environmental conditions. In this study, a novel strain AY001 of B. contam- inans (AY001) was identified from the rhizosphere soil sample. AY001 showed (i) various plant growth-promoting rhizobacteria (PGPR)-related traits, (ii) antagonistic activity against different plant pathogenic fungi, (iii) su…	Rejected	Biotic stress
MYB' + 'gene express'+ 'drought stress' + ' plants'+ 'PGPR'	Google scholar	The contribution of Trichoderma to balancing the costs of plant growth and defense	Hermosa et al., 2013	Trichoderma is a fungal genus of cosmopolitan distribution and high biotechnological value, with several species currently used as biological control agents. Additionally, the enzyme systems of the fungus are widely applied in industry. Spe- cies of Trichoderma protect plants against the attack of soil-borne plant pathogens by competing for nutrients and inhibiting or killing plant pathogenic fun…	Rejected	Fungi
MYB' + 'gene express'+ 'drought stress' + ' plants'+ 'PGPR'	Google scholar	Consequences and Mitigation Strategies of Abiotic Stresses in Wheat (Triticum aestivum L.) under the Changing Climate	Hossain et al., 2020	Wheat is one of the world’s most commonly consumed cereal grains. During abiotic stresses, the physiological and biochemical alterations in the cells reduce growth and development of plants that ultimately decrease the yield of wheat. Therefore, novel approaches are needed for sustainable wheat production under the changing climate to ensure food and nutritional security of the ever-increasing po…	Rejected	Review
MYB' + 'gene express'+ 'drought stress' + ' plants'+ 'PGPR'	Google scholar	Exogenous Melatonin mediates the regulation of endogenous nitric oxide in Glycine max L. to reduce effects of drought stress	Imran et al., 2021	Drought stress retards plant growth and yield. Melatonin and nitric oxide (NO) have demonstrated their potential role against abiotic stresses; however, the underlying molecular mechanism by which they interact and extend drought stress tolerance has not been fully elucidated. Herein, the current study was performed to establish the optimum beneficial concentration of MT and NO in combating droug…	Rejected	No PGPR
MYB' + 'gene express'+ 'drought stress' + ' plants'+ 'PGPR'	Google scholar	Plant growth promoting bacteria confer salt tolerance in Vigna radiata by up-regulating antioxidant defense and biological soil fertility	Islam et al., 2016	Salinity, a frequently occurring abiotic stress, is a major constraint for crop productivity worldwide. The present study was conducted to evaluate the ability of plant growth promoting rhizobacteria (PGPR) Bacillus cereus Pb25, isolated from soil irrigated with saline water, to promote Vigna radiate (mungbean) growth in the absence and presence of salt stress (9 dS m-1). Results demonstrated tha…	Rejected	No MYB
MYB' + 'gene express'+ 'drought stress' + ' plants'+ 'PGPR'	Google scholar	The Combined Effects of Rhizobacteria and Methyl Jasmonate on Rosmarinic Acid Production and Gene Expression Profile in Origanum Vulgare l. Under Salinity Conditions	Jafari et al., 2022	Origanum vulgare L. is a valuable flavoring, mainly due to its important essential oils and is widely used in different industries. This study aimed to compare the expression level of genes coding for proteins involved in rosmarinic acid (RA) biosynthesis pathway and some physiological responses in O. vulgare under two levels of salinity (2, 4 decisiemens/meter (dS/m), and 0 as a control), two le…	Rejected	No MYB
MYB' + 'gene express'+ 'drought stress' + ' plants'+ 'PGPR'	Google scholar	Delineation of molecular interactions of plant growth promoting bacteria induced β‐1,3‐glucanases and guanosine triphosphate ligand for antifungal response in rice: a molecular dynamics approach	Jha et al., 2022	Background The plant growth is influenced by multiple interactions with biotic (microbial) and abiotic components in their surroundings. These microbial interactions have both positive and negative effects on plant. Plant growth promoting bacterial (PGPR) interaction could result in positive growth under normal as well as in stress conditions. Methods Here, we have screened two PGPR’s and determi…	Rejected	Biotic stress
MYB' + 'gene express'+ 'drought stress' + ' plants'+ 'PGPR'	Google scholar	Engineering abiotic stress response in plants for biomass production	Joshi et al., 2018	One of the major challenges in today’s agriculture is to achieve enhanced plant growth and biomass even under adverse envi- ronmental conditions. Recent advancements in genetics and molecular biology have enabled the identification of a complex signaling network contributing toward plant growth and devel- opment on the one hand and abiotic stress response on the other hand. As an outcome of these…	Rejected	Review
MYB' + 'gene express'+ 'drought stress' + ' plants'+ 'PGPR'	Google scholar	Archaea, tiny helpers of land plants	Jung et al., 2020	Archaea are members of most microbiomes. While archaea are highly abundant in extreme environ- ments, they are less abundant and diverse in association with eukaryotic hosts. Nevertheless, archaea are a substantial constituent of plant-associated ecosystems in the aboveground and belowground phytobiome. Only a few studies have investigated the role of archaea in plant health and its potential sym…	Rejected	Review
MYB' + 'gene express'+ 'drought stress' + ' plants'+ 'PGPR'	Google scholar	An Overview of the Genetics of Plant Response to Salt Stress: Present Status and the Way Forward	Kaleem et al., 2018	Salinity is one of the major threats faced by the modern agriculture today. It causes multidimensional effects on plants. These effects depend upon the plant growth stage, intensity, and duration of the stress. All these lead to stunted growth and reduced yield, ultimately inducing economic loss to the farming community in particular and to the country in general. The soil conditions of agricultu…	Rejected	Review
MYB' + 'gene express'+ 'drought stress' + ' plants'+ 'PGPR'	Google scholar	Understanding the molecular basis of plant growth promotional effect of Pseudomonas fluorescens on rice through protein profiling	Kandasamy et al., 2009	Background: Plant Growth Promoting Rhizobacteria (PGPR), Pseudomonas fluorescens strain KH- 1 was found to exhibit plant growth promotional activity in rice under both in-vitro and in-vivo conditions. But the mechanism underlying such promotional activity of P. fluorescens is not yet understood clearly. In this study, efforts were made to elucidate the molecular responses of rice plants to P. flu…	Rejected	No Abiotic stress
MYB' + 'gene express'+ 'drought stress' + ' plants'+ 'PGPR'	Google scholar	Plant Health Under Biotic Stress	Kashyap et al., 2019		Rejected	Book
MYB' + 'gene express'+ 'drought stress' + ' plants'+ 'PGPR'	Google scholar	Control of Drought Stress in Wheat Using Plant-Growth- Promoting Bacteria	Kasim et al., 2013	Abiotic stress conditions are the main limiting factors for crop cultivation around the world. In the present study we aimed to improve wheat growth under drought stress conditions through priming with beneficial bacteria considered as plant-growth promoting bacteria (PGPB). Two bacterial strains, Bacillus amyloliquefaciens 5113 and Azospirillum brasilense NO40, were used to prime the wheat cv. S…	Rejected	No MYB
MYB' + 'gene express'+ 'drought stress' + ' plants'+ 'PGPR'	Google scholar	Plant-growth-promoting rhizobacteria: drought stress alleviators to ameliorate crop production in drylands	Kaushal et al., 2016	Drylands are known for being a drought stressed environment, which is an alarming constraint to crop produc- tivity. To rescue plant growth in such stressful conditions, plant-growth-promoting rhizobacteria (PGPR) are a bulwark against drought stress and imperilled sustainability of agricul- ture in drylands. PGPR mitigates the impact of drought stress on plants through a process called rhizobact…	Rejected	Review
MYB' + 'gene express'+ 'drought stress' + ' plants'+ 'PGPR'	Google scholar	Biocontrol Potential of Bacillus amyloliquefaciens against Botrytis pelargonii and Alternaria alternata on Capsicum annuum	Kazerooni et al., 2021	The aim of this study was to assess the ability of Bacillus amyloliquefaciens, to augment plant growth and suppress gray mold and leaf spot in pepper plants. Morphological modifications in fungal pathogen hyphae that expanded toward the PGPR colonies were detected via scanning electron microscope. Furthermore, preliminary screening showed that PGPR could produce various hydrolytic enzymes in its …	Rejected	Biotic stress
MYB' + 'gene express'+ 'drought stress' + ' plants'+ 'PGPR'	Google scholar	Comparative physiological and Metabolic Analysis Reveals a Complex Mechanism Involved in Drought tolerance in Chickpea (Cicer arietinum L.) Induced by pGpR and pGRs	Khan et al., 2019	the plant growth promoting rhizobacteria (pGpR) and plant growth regulators (pGRs) can be applied to improve the growth and productivity of plants, with potential to be used for genetic improvement of drought tolerance. However, for genetic improvement to be achieved, a solid understanding of the physiological and biochemical changes in plants induced by pGpR and pGR is required. the present stud…	Rejected	No MYB
MYB' + 'gene express'+ 'drought stress' + ' plants'+ 'PGPR'	Google scholar	Halotolerant bacteria mitigate the effects of salinity stress on soybean growth by regulating secondary metabolites and molecular responses	Khan et al., 2021	Background: Salinity is a major threat to the agriculture industry due to the negative impact of salinity stress on crop productivity. In the present study, we isolated rhizobacteria and evaluated their capacities to promote crop growth under salt stress conditions. Results: We isolated rhizospheric bacteria from sand dune flora of Pohang beach, Korea, and screened them for plant growth-promoting…	Rejected	No MYB
MYB' + 'gene express'+ 'drought stress' + ' plants'+ 'PGPR'	Google scholar	Metal resistant pGpR lowered Cd uptake and expression of metal transporter genes with improved growth and photosynthetic pigments in Lycopersicon esculentum under metal toxicity	Khanna et al., 2018	Plant growth promoting rhizobacteria (PGPRs) are very effective in immobilization of heavy metals and reducing their translocation in plants via precipitation, complex formation and adsorption. the present study was therefore designed to understand the role of Pseudomonas aeruginosa and Burkholderia gladioli in mitigation of Cd stress (0.4 mM) in 10-days old L. esculentum seedlings. the present w…	Rejected	No MYB
MYB' + 'gene express'+ 'drought stress' + ' plants'+ 'PGPR'	Google scholar	Multifaceted Interactions Between Endophytes and Plant: Developments and Prospects	Khare et al., 2018	Microbial endophytes are present in all known plant species. The ability to enter and thrive in the plant tissues makes endophytes unique, showing multidimensional interactions within the host plant. Several vital activities of the host plant are known to be influenced by the presence of endophytes. They can promote plant growth, elicit defense response against pathogen attack, and can act as rem…	Rejected	Review
MYB' + 'gene express'+ 'drought stress' + ' plants'+ 'PGPR'	Google scholar	Multifaceted Interactions Between Endophytes and Plant: Developments and Prospects	Khare et al., 2018	Microbial endophytes are present in all known plant species. The ability to enter and thrive in the plant tissues makes endophytes unique, showing multidimensional interactions within the host plant. Several vital activities of the host plant are known to be influenced by the presence of endophytes. They can promote plant growth, elicit defense response against pathogen attack, and can act as rem…	Rejected	Review
MYB' + 'gene express'+ 'drought stress' + ' plants'+ 'PGPR'	Google scholar	Alternative Splicing for Improving Abiotic Stress Tolerance and Agronomic Traits in Crop Plants	Kim et al., 2020	Most eukaryotic genes undergo various post-transcriptional processing events before being translated into proteins. Alterna- tive splicing (AS) is one such event and is an essential mechanism in post-transcriptional gene regulation that allows multiple mRNA variants to be expressed from a single pre-mRNA, thereby expending the functional capacity of a gene as well as the organismal complexity. Wi…	Rejected	Review
MYB' + 'gene express'+ 'drought stress' + ' plants'+ 'PGPR'	Google scholar	Alleviation of Drought Stress and Plant Growth Promotion by Pseudomonas libanensis EU-LWNA-33, a Drought-Adaptive Phosphorus-Solubilizing Bacterium	Kour et al., 2020	Drought is a very common abiotic stress worldwide in arid and semiarid areas. It decreases the growth and yield of the crops. Due to drought stress, there is insufficient intake of the nutrients, the low rate of pho- tosynthesis and limited supply of water in plants. Inocu- lating crops with plant growth-promoting rhizobacteria (PGPR) mitigates the deleterious effects of stress by promoting benef…	Rejected	No MYB
MYB' + 'gene express'+ 'drought stress' + ' plants'+ 'PGPR'	Google scholar	Understanding the role of miRNAs for improvement of tea quality and stress tolerance	Krishnatreya et al., 2021	MicroRNAs (miRNAs) are an emerging class of small non-coding RNAs that exhibit important role in regulation of gene expression, mostly through the mechanism of cleavage and/or inhibition of translation of target mRNAs during or after transcription. Although much has been unravelled about the role of miRNAs in diverse biological processes like maintenance of functional integrity of genes and genom…	Rejected	Review
MYB' + 'gene express'+ 'drought stress' + ' plants'+ 'PGPR'	Google scholar	Identification, characterization and expression profiles of Fusarium udum stress-responsive WRKY transcription factors in Cajanus cajan under the influence of NaCl stress and Pseudomonas fluorescens oKc	Kumar et al., 2019	The WRKY gene family has never been identified in pigeonpea (Cajanus cajan). Therefore, objective of the present study was to identify the WRKY gene family in pigeonpea and characterize the Fusarium udum stress-responsive WRKY genes under normal, NaCl-stressed and Pseudomonas fluorescens OKC (a plant growth-promoting bacterial strain) treated conditions. The aim was to characterize the Fusarium u…	Rejected	Fungi
MYB' + 'gene express'+ 'drought stress' + ' plants'+ 'PGPR'	Google scholar	Walking through crossroads–rice responses to heat and biotic stress interactions	Kumar et al., 2022	Rice, the most important source of calories for humans is prone to severe yield loss due to changing climate including heat stress. Additionally, rice encounters biotic stresses in conjunction with heat stress, which exacerbates the adverse effects, and exponentially increase such losses. Several investigations have identified biotic and heat stress-related quantitative trait loci (QTLs) that may…	Rejected	Review
MYB' + 'gene express'+ 'drought stress' + ' plants'+ 'PGPR'	Google scholar	Bacterial-Mediated Induction of Systemic Tolerance to Salinity with Expression of Stress Alleviating Enzymes in Soybean (Glycine max L. Merrill)	Kumari et al., 2015	Abstract This study explored several features related to salt tolerance in soybean plants through plant growth-pro- moting rhizobacteria (PGPR; Pseudomonas sp. strain AK- 1, and Bacillus sp. strain SJ-5). We report the significant effect of 1-aminocyclopropane-1-carboxylate deaminase, indole-3-acetic acid production and exopolysaccharide production from both bacterial strains on physical pa- rame…	Rejected	No MYB
MYB' + 'gene express'+ 'drought stress' + ' plants'+ 'PGPR'	Google scholar	Induced drought tolerance through wild and mutant bacterial strain Pseudomonas simiae in mung bean (Vigna radiata L.)	Kumari et al., 2016	The present study focused on the overproduc- ing mutant of a plant growth promoting rhizobacterium (PGPR) Pseudomonas simiae strain AU (MTCC-12057) for significant drought tolerance in mung bean plants. Five mutants namely AU-M1, AU-M2, AU-M3, AU-M4 and AU-M5 were made after treatment of wild type strain with N-methyl-N-nitro-N-nitrosoguanidine. Mutant strain AU- M4 was recorded for enhanced ACC …	Rejected	No MYB
MYB' + 'gene express'+ 'drought stress' + ' plants'+ 'PGPR'	Google scholar	Plant Health Under Biotic Stress	Kumari et al., 2019		Rejected	Book
MYB' + 'gene express'+ 'drought stress' + ' plants'+ 'PGPR'	Google scholar	Drought and Heat Stress in Cool-Season Food Legumes in Sub-Tropical Regions: Consequences, Adaptation, and Mitigation Strategies	Kumari et al., 2021	Drought and heat stress are two major abiotic stresses that challenge the sustainability of agriculture to a larger extend. The changing and unpredictable climate further aggravates the efforts made by researchers as well as farmers. The stresses during the terminal stage of cool-season food legumes may affect numerous physiological and biochemical reactions that may result in poor yield. The pla…	Rejected	Review
MYB' + 'gene express'+ 'drought stress' + ' plants'+ 'PGPR'	Google scholar	Root transcriptome analysis of Arabidopsis thaliana exposed to beneficial Bacillus subtilis FB17 rhizobacteria revealed genes for bacterial recruitment and plant defense independent of malate efflux	Lakshmanan et al., 2013	Our previous work has demonstrated that Arabidopsis thaliana can actively recruit beneficial rhizobacteria Bacillus subtilis strain FB17 (hereafter FB17) through an unknown shoot-to-root long-distance signaling pathway post a foliar bacterial pathogen attack. However, it is still not well understood which genetic targets FB17 affects in plants. Microarray analysis of A. thaliana roots treated wit…	Rejected	No MYB
MYB' + 'gene express'+ 'drought stress' + ' plants'+ 'PGPR'	Google scholar	Bacilli in Climate Resilient Agriculture and Bioprospecting	Lastochkina et al., 2019		Rejected	Book
MYB' + 'gene express'+ 'drought stress' + ' plants'+ 'PGPR'	Google scholar	Microbiome engineering and plant biostimulants for sustainable crop improvement and mitigation of biotic and abiotic stresses	Lau et al., 2022	Globally, despite the intense agricultural production, the output is expected to be limited by emerging infectious plant diseases and adverse impacts of climate change. The annual increase in agricultural output to sustain the human popu- lation at the expense of the environment has exacerbated the current climate conditions and threatened food security. The demand for sustainable agricultural pr…	Rejected	Review
MYB' + 'gene express'+ 'drought stress' + ' plants'+ 'PGPR'	Google scholar	Bacillus subtilis strain L1 promotes nitrate reductase activity in Arabidopsis and elicits enhanced growth performance in Arabidopsis, lettuce, and wheat	Lee et al., 2020	Plant growth promoting rhizobacteria (PGPR) are a group of bacteria that promote plants growth in the rhizosphere. PGPRs are involved in various mechanisms that reinforce plant development. In this study, we screened for PGPRs that were effective in early growth of Arabidopsis thaliana when added to the media and one Bacillus subtilis strain L1 (Bs L1) was selected for further study. When Bs L1 w…	Rejected	No MYB
MYB' + 'gene express'+ 'drought stress' + ' plants'+ 'PGPR'	Google scholar	Arbuscular mycorrhizal fungal responses to abiotic stresses: A review	Lenoir et al., 2016	The majority of plants live in close collaboration with a diversity of soil organisms among which arbus- cular mycorrhizal fungi (AMF) play an essential role. Mycorrhizal symbioses contribute to plant growth and plant protection against various environmental stresses. Whereas the resistance mechanisms induced in mycorrhizal plants after exposure to abiotic stresses, such as drought, salinity and …	Rejected	Review
MYB' + 'gene express'+ 'drought stress' + ' plants'+ 'PGPR'	Google scholar	Plant growth promoting rhizobacteria isolated from halophytes and drought‐tolerant plants: genomic characterisation and exploration of phyto‐beneficial traits	Leontidou et al., 2020	lant growth promoting rhizobacteria (PGPR) are able to provide cross‐protection against multiple stress factors and facilitate growth of their plant symbionts in many ways. the aim of this study was to isolate and characterize rhizobacterial strains under natural conditions, associated with naturally occurring representatives of wild plant species and a local tomato cultivar, growing in different…	Rejected	No MYB
MYB' + 'gene express'+ 'drought stress' + ' plants'+ 'PGPR'	Google scholar	Molecular mechanisms associated with microbial biostimulant‐mediated growth enhancement, priming and drought stress tolerance in maize plants	Lephatsi et al., 2022	Microbial‐based biostimulants are emerging as effective strategies to improve agricultural productivity; however, the modes of action of such formulations are still largely unknown. Thus, herein we report elucidated metabolic reconfigurations in maize (Zea mays) leaves associated with growth promotion and drought stress tolerance induced by a microbial‐based biostimulant, a Bacillus consortium. M…	Rejected	No MYB
MYB' + 'gene express'+ 'drought stress' + ' plants'+ 'PGPR'	Google scholar	The Arabidopsis MYB transcription factor, MYB111 modulates salt responses by regulating flavonoid biosynthesis	Li et al., 2019	Salt stress is an adverse environmental factor severely disturbing plant growth and development. Correspondingly, plants have evolved in a set of machinery to cope with salt toxicity including transcriptional regulation. In this study, by employing knockout and overproducing plants, we found that MYB111 is a positive regulator in salt stress response. MYB111 deficiency significantly decreased sal…	Rejected	No PGPR
MYB' + 'gene express'+ 'drought stress' + ' plants'+ 'PGPR'	Google scholar	Over-expression of L-gulono-γ-lactone oxidase (GLOase) gene leads to ascorbate accumulation with enhanced abiotic stress tolerance in tomato	Lim et al., 2012	Vitamin C (ascorbic acid, AsA) is an essential com- ponent for collagen biosynthesis and also for correct function- ing of the cardiovascular system in humans. Plants and several animals can synthesize ascorbic acid, whereas humans lack the gene essential for ascorbic acid biosynthesis and must acquire the vitamin from their diet. In the present study, we developed a transgenic tomato plant (Lyco…	Rejected	No PGPR
MYB' + 'gene express'+ 'drought stress' + ' plants'+ 'PGPR'	Google scholar	Isolation and expression analysis of CsCML genes in response to abiotic stresses in the tea plant (Camellia sinensis)	Ma et al., 2019	Calmodulin-like (CML) proteins are a class of important Ca2+ sensors in plants, which play vital roles in regulating plant growth and development and response to abiotic stress. tea plant (Camellia sinensis L.) is the most popular non-alcoholic economic beverage crop around the world. However, the potential functions of CMLs in either tea plants growth or in the response to environmental stresses…	Rejected	No PGPR
MYB' + 'gene express'+ 'drought stress' + ' plants'+ 'PGPR'	Google scholar	Understanding the molecular mechanisms for the enhanced phytoremediation of heavy metals through plant growth promoting rhizobacteria: A review	Manoj et al., 2020	Rapid industrialization, modern agricultural practices and other anthropogenic activities add a significant quantity of toxic heavy metals into the environment, which induces severe toxic effects on all form of living organisms, alter the soil properties and its biological activity. Remediation of heavy metal contaminated sites has become an urgent necessity. Among the existing strategies, phytor…	Rejected	Review
MYB' + 'gene express'+ 'drought stress' + ' plants'+ 'PGPR'	Google scholar	The Date Palm Genome, Vol. 2 Omics and Molecular Breeding	Masmoudi et al., 2021		Rejected	Book
MYB' + 'gene express'+ 'drought stress' + ' plants'+ 'PGPR'	Google scholar	An update on biological advancement of Jatropha curcas L.: New insight and challenges	Mazumdar et al., 2018	Sustainable production of non-food oleaginous crops is highly desirable towards meeting increasing global de- mands for energy by supplementing the diminishing supply of fossil fuels without affecting food security. Jatropha curcas L., a high yielding oleaginous seed crop (30–48% oil), with a simple propagation system, short gestation period and high adaptability to a wide range of climatic and e…	Rejected	Review
MYB' + 'gene express'+ 'drought stress' + ' plants'+ 'PGPR'	Google scholar	Transcriptional profiling in cotton associated with Bacillus subtilis (UFLA285) induced biotic-stress tolerance	Medeiros et al., 2011	Plant growth promoting rhizobacteria (PGPR) confer disease resistance in many agricultural crops. In the case of Bacillus subtilis (UFLA285) isolated from the cotton producing state of Mato Grosso (Brazil), in addition to inducing foliar and root growth, disease resistance against damping-off caused by Rhizoctonia solani was observed. The aim of this cotton study was to identify gene transcriptio…	Rejected	Biotic stress
MYB' + 'gene express'+ 'drought stress' + ' plants'+ 'PGPR'	Google scholar	Mitigation of Salinity Stress in Wheat Seedlings Due to the Application of Phytohormone-Rich Culture Filtrate Extract of Methylotrophic Actinobacterium Nocardioides sp. NIMMe6	Meena et al., 2020	Salinity stress is an important plant growth limiting factor influencing crop productivity negatively. Microbial interventions for salinity stress mitigation have invited significant attention due to the promising impacts of interactive associations on the intrinsic mechanisms of plants. We report the impact of microbial inoculation of a halotolerant methylotrophic actinobacterium (Nocardioides s…	Rejected	No MYB
MYB' + 'gene express'+ 'drought stress' + ' plants'+ 'PGPR'	Google scholar	The roles of plant growth promoting rhizobacteria in sustainable vegetable production in Ethiopia	Mekonnen et al., 2021	Vegetable production is an important economic activity and a major source of vitamins, minerals, and income in Ethiopia. However, the production of vegetables is much less developed than the production of food grains in the country. Vegetable production still needs improvement in combating biotic and abiotic threats with innovative tech- nologies. Nowadays, excess use of chemical fertilizers to s…	Rejected	Review
MYB' + 'gene express'+ 'drought stress' + ' plants'+ 'PGPR'	Google scholar	The cytokinin-producing plant beneficial bacterium Pseudomonas fluorescens G20-18 primes tomato (Solanum lycopersicum) for enhanced drought stress responses	Mekureyaw et al., 2022	Plant growth-promoting rhizobacteria (PGPR) are known for exerting beneficial effects on plant growth and tolerance to plant pathogens. However, their specific role in mediating protection against abiotic stress remains underexplored. The aim of this study was to characterise the ability of the cytokinin-producing beneficial bac- terium Pseudomonas fluorescens G20-18 to enhance tomato growth and …	Rejected	No MYB
MYB' + 'gene express'+ 'drought stress' + ' plants'+ 'PGPR'	Google scholar	The biological approaches of altering the growth and biochemical properties of medicinal plants under salinity stress	Miransari et al., 2021	Due to their interesting properties for human health, medicinal plants are of worldwide interest, including Iran. More has yet to be investigated and analyzed on the use of methods affecting medicinal plant growth and biochemical properties under stress. The important question about medicinal plants is the purpose of their plantation, determining their growth conditions. The present review articl…	Rejected	Review
MYB' + 'gene express'+ 'drought stress' + ' plants'+ 'PGPR'	Google scholar	Characterisation of Pseudomonas spp. and Ochrobactrum sp. isolated from volcanic soil	Mishra et al., 2017	Soil bacteria may have properties of plant growth promotion but not be sufficiently beneficial for plants under stress conditions. This challenge has led researchers to extend their searches into extreme environments for potential soil bacteria with multiple plant beneficial traits as well as abiotic stress tolerance abilities. In the current study, an attempt was made to evaluate soil bacteria f…	Rejected	No Abiotic stress
MYB' + 'gene express'+ 'drought stress' + ' plants'+ 'PGPR'	Google scholar	Drought tolerant Ochrobactrum sp. inoculation performs multiple roles in maintaining the homeostasis in Zea mays L. subjected to deficit water stress	Mishra et al., 2020	Plant growth-promoting rhizobacteria (PGPR) improve plant health under various biotic and abiotic stresses. However, the underlying mechanisms of the protective effects of PGPR in deficit water stress (WS) remain less explored. This study aimed to characterize the role of Ochrobactrum sp. NBRISH6 inoculation on maize (Zea mays “Maharaja”) under WS conditions using multiple approaches such as phys…	Rejected	No MYB
MYB' + 'gene express'+ 'drought stress' + ' plants'+ 'PGPR'	Google scholar	Plant growth promoting bacteria for combating salinity stress in plants – Recent developments and prospects: A review	Mishra et al., 2021	Soil salinity has emerged as a great threat to the agricultural ecosystems throughout the globe. Many continents of the globe are affected by salinity and crop productivity is severely affected. Anthropogenic activities leading to the degradation of agricultural land have also accelerated the rate of salinization in arid and semi-arid regions. Several approaches are being evaluated for remediatin…	Rejected	Review
MYB' + 'gene express'+ 'drought stress' + ' plants'+ 'PGPR'	Google scholar	Demonstrating the potential of abiotic stress-tolerant Jeotgalicoccus huakuii NBRI 13E for plant growth promotion and salt stress amelioration	Misra et al., 2019	he present study aimed to demonstrate the potential of abiotic stress-tolerant Jeotgalicoccus huakuii NBRI 13E for plant growth promotion and salt stress amelioration. NBRI 13E was characterized for abiotic stress tolerance and plant growth-promoting (PGP) attributes under normal and salt stress conditions. Phylogenetic comparison of NBRI 13E was carried out with known species of the same genera …	Rejected	No MYB
MYB' + 'gene express'+ 'drought stress' + ' plants'+ 'PGPR'	Google scholar	Regulation of IAA Biosynthesis in Azospirillum brasilense Under Environmental Stress Conditions	Molina et al., 2018	Indole-3-acetic acid (IAA) is one of the most important molecules produced by Azospirillum sp., given that it affects plant growth and development. Azospirillum brasilense strains Sp245 and Az39 (pFAJ64) were pre-incubated in MMAB medium plus 100 mg/mL l-tryptophan and treated with or exposed to the following (a) abiotic and (b) biotic stress effec- tors: (a) 100 mM NaCl or Na2SO4, 4.0% (w/v) PEG…	Rejected	No MYB
MYB' + 'gene express'+ 'drought stress' + ' plants'+ 'PGPR'	Google scholar	Advances in the rhizosphere: stretching the interface of life	Mommer et al., 2016		Rejected	Review
MYB' + 'gene express'+ 'drought stress' + ' plants'+ 'PGPR'	Google scholar	The Role of Biostimulants as Alleviators of Biotic and Abiotic Stresses in Grapevine: A Review	Monteiro et al., 2021	The viticulture and wine industry contribute to the economy and reputation of many countries all over the world. With the predicted climate change, a negative impact on grapevine physiology, growth, production, and quality of berries is expected. On the other hand, the impact of these changes in phytopathogenic fungi development, survival rates, and host susceptibility is unpredictable. Grapevine…	Rejected	Review
MYB' + 'gene express'+ 'drought stress' + ' plants'+ 'PGPR'	Google scholar	A fruitful decade of bacterial ACC deaminase biotechnology: a pragmatic approach towards abiotic stress relief in plants	Moon et al., 2022	Global food security can be achieved through rigorous agricultural security because agriculture is the basis of food. Several reports have shown that environmental stresses greatly affect agri- culture productivity around the globe. Abiotic stress- ors cause the stimulation of ethylene biosynthesis in plants, which is a crucial mediator of environmen- tal stresses in plants. Thus, the mitigation …	Rejected	Review
MYB' + 'gene express'+ 'drought stress' + ' plants'+ 'PGPR'	Google scholar	Omics Science for Rhizosphere Biology	Moradi et al., 2021		Rejected	Book
MYB' + 'gene express'+ 'drought stress' + ' plants'+ 'PGPR'	Google scholar	Plant Transcriptome Reprograming and Bacterial Extracellular Metabolites Underlying Tomato Drought Resistance Triggered by a Beneficial Soil Bacteria	Morcillo et al., 2021	Water deficit is one of the major constraints to crop production and food security world- wide. Some plant growth-promoting rhizobacteria (PGPR) strains are capable of increasing plant drought resistance. Knowledge about the mechanisms underlying bacteria-induced plant drought resistance is important for PGPR applications in agriculture. In this study, we show the drought stress-mitigating effect…	Accepted
MYB' + 'gene express'+ 'drought stress' + ' plants'+ 'PGPR'	Google scholar	Melatonin and Its Protective Role against Biotic Stress Impacts on Plants	Moustafa-Farag et al., 2019	Biotic stress causes immense damage to agricultural products worldwide and raises the risk of hunger in many areas. Plants themselves tolerate biotic stresses via several pathways, including pathogen-associated molecular patterns (PAMPs), which trigger immunity and plant resistance (R) proteins. On the other hand, humans use several non-ecofriendly methods to control biotic stresses, such as chem…	Rejected	Review
MYB' + 'gene express'+ 'drought stress' + ' plants'+ 'PGPR'	Google scholar	Mechanisms Regulating the Dynamics of Photosynthesis Under Abiotic Stresses	Muhammad et al., 2021	Photosynthesis sustains plant life on earth and is indispensable for plant growth and development. Factors such as unfavorable environmental conditions, stress regulatory networks, and plant biochemical processes limits the photosynthetic efficiency of plants and thereby threaten food security worldwide. Although numerous physiological approaches have been used to assess the performance of key ph…	Rejected	Review
MYB' + 'gene express'+ 'drought stress' + ' plants'+ 'PGPR'	Google scholar	Role of Ethylene Biosynthesis Genes in the Regulation of Salt Stress and Drought Stress Tolerance in Petunia	Naing et al., 2022	Ethylene plays a critical signaling role in the abiotic stress tolerance mechanism. However, the role of ethylene in regulating abiotic stress tolerance in petunia has not been well- investigated, and the underlying molecular mechanism by which ethylene regulates abiotic stress tolerance is still unknown. Therefore, we examined the involvement of ethylene in salt and drought stress tolerance of p…	Rejected	No PGPR
MYB' + 'gene express'+ 'drought stress' + ' plants'+ 'PGPR'	Google scholar	Streptomyces spp. enhance vegetative growth of maize plants under saline stress	Nozari et al., 2021	Saline stress is one of the abiotic stresses that most compromises the yield of crops and can be mitigated by plant growth- promoting rhizobacteria (PGPR). This work characterized rhizobacteria isolates from the genus Streptomyces as PGPR and evaluated their role on growth and alleviation of the effects caused by saline stress in maize (Zea mays L.). Production of indolic compounds (IC), sideroph…	Rejected	No MYB
MYB' + 'gene express'+ 'drought stress' + ' plants'+ 'PGPR'	Google scholar	Characterization and potential of plant growth promoting rhizobacteria isolated from native Andean crops	Ogata‑Gutiérrez et al., 2017	Bacteria isolated from soil and rhizosphere samples collected in Peru from Andean crops were tested in vitro and in vivo to determine their potential as plant growth promoters and their ability to induce systemic resistance to Alternaria alternata in tomato plants. The isolates were identified by sequencing their 16S ribosomal RNA gene. Test for phosphate solubilization, and indolacetic acid were…	Rejected	Review
MYB' + 'gene express'+ 'drought stress' + ' plants'+ 'PGPR'	Google scholar	Plant Growth Promoting Rhizobacterial Mitigation of Drought Stress in Crop Plants: Implications for Sustainable Agriculture	Ojuederie et al., 2019	Abiotic stresses arising from climate change negates crop growth and yield, leading to food insecurity. Drought causes oxidative stress on plants, arising from excessive production of reactive oxygen species (ROS) due to inadequate CO2, which disrupts the photosynthetic machinery of plants. The use of conventional methods for the development of drought-tolerant crops is time-consuming, and the fu…	Rejected	Review
MYB' + 'gene express'+ 'drought stress' + ' plants'+ 'PGPR'	Google scholar	Alteration in expression level of some growth and stress-related genes after rhizobacteria inoculation to alleviate drought tolerance in sensitive rice genotype	Omar et al., 2021	Background: Drought stress is one of the major abiotic stresses that adversely affect rice production. Four rice geno‐ types, Giza177, IR64 (as sensitive genotypes) and Vandana, Orabi3 (as tolerant genotypes) were used to screen and characterize the soil microbes associated with each genotype under drought stress. Results: The soil microbes associated with the tolerant genotypes showed high droug…	Rejected	No MYB
MYB' + 'gene express'+ 'drought stress' + ' plants'+ 'PGPR'	Google scholar	Bacillus aryabhattai SRB02 tolerates oxidative and nitrosative stress and promotes the growth of soybean by modulating the production of phytohormones	Park et al., 2017	Plant growth promoting rhizobacteria (PGPR) are diverse, naturally occurring bacteria that establish a close association with plant roots and promote the growth and immunity of plants. Established mechanisms involved in PGPR-mediated plant growth promotion include regulation of phytohormones, improved nutrient availability, and antagonistic effects on plant pathogens. In this study, we isolated a…	Rejected	No MYB
MYB' + 'gene express'+ 'drought stress' + ' plants'+ 'PGPR'	Google scholar	Plant-growth-promoting rhizobacteria to improve crop growth in saline soils: a review	Paul et al., 2014	Saline soils are a major issue for agriculture be- cause salt turns agronomically useful lands into unproductive areas. The United Nations Environment Program estimates that approximately 20 % of agricultural land and 50 % of cropland in the world is salt-stressed. Soil salinisation is reducing the area that can be used for agriculture by 1–2 % every year, hitting hardest in the arid and semi-ari…	rejected	Review
MYB' + 'gene express'+ 'drought stress' + ' plants'+ 'PGPR'	Google scholar	Accumulation of beneficial bacteria in the rhizosphere of maize (Zea mays L.) grown in a saline soil in responding to a consortium of plant growth promoting rhizobacteria	Peng et al., 2017	Purpose: Salt stress reduces plant growth and is now becoming one of the most important factors restricting the agricultural productivity. Inoculation of plant growth-promoting rhizobacteria (PGPR) has been shown to confer plant tolerance against abiotic stress, but the detailed mechanisms of how this occurs remain unclear and the application effects in different reports are unstable. In order to…	rejected	No MYB
MYB' + 'gene express'+ 'drought stress' + ' plants'+ 'PGPR'	Google scholar	Unraveling the Molecular Basis of Bacillus Megaterium Interactions in Rice for Plant Growth Promotion Through Proteomics and Gene Expression	Prabhukarthikeyan et al., 2022	In this study, we evaluated the efficacy of Bacillus strains for plant growth promotional activities under in vitro and in vivo conditions. The results indicated that Bacillus megaterium BS11 was superior in enhancing the plant growth and yield of rice plants compared to other Bacillus strains. Currently, there is no information available on the molecular mechanism of Rice– B. megaterium interact…	Rejected	No Abiotic stress
MYB' + 'gene express'+ 'drought stress' + ' plants'+ 'PGPR'	Google scholar	Sustainable Agriculture Reviews 53 Nanoparticles: A New Tool to Enhance Stress Tolerance	Qari et al., 2021		Rejected	Book
MYB' + 'gene express'+ 'drought stress' + ' plants'+ 'PGPR'	Google scholar	Role of Ethylene Biosynthesis Genes in the Regulation of Salt Stress and Drought Stress Tolerance in Petunia	Naing et al., 2022		Rejected	No PGPR
MYB' + 'gene express'+ 'drought stress' + ' plants'+ 'PGPR'	Google scholar	Biotechnological strategies for enhancing heavy metal tolerance in neglected and underutilized legume crops: A comprehensive review	Rai et al., 2021	Contamination of agricultural land and water by heavy metals due to rapid industrialization and urbanization including various natural processes have become one of the major constraints to crop growth and productivity. Several studies have reported that to counteract heavy metal stress, plants should be able to maneuver various physiological, biochemical and molecular processes to improve their g…	Rejected	Review
MYB' + 'gene express'+ 'drought stress' + ' plants'+ 'PGPR'	Google scholar	Plant, Soil and Microbes in Tropical Ecosystems	Rashid et al., 2021		Rejected	Book
MYB' + 'gene express'+ 'drought stress' + ' plants'+ 'PGPR'	Google scholar	Microbes and Signaling Biomolecules Against Plant Stress Strategies of Plant- Microbe Relationships for Better Survival	Rastogi et al., 2021		Rejected	Book
MYB' + 'gene express'+ 'drought stress' + ' plants'+ 'PGPR'	Google scholar	Wheat Production in Changing Environments Responses, Adaptation and Tolerance	Raza et al., 2019		Rejected	Book
MYB' + 'gene express'+ 'drought stress' + ' plants'+ 'PGPR'	Google scholar	Omics: The way forward to enhance abiotic stress tolerance in Brassica napus L	Raza et al., 2021	Plant abiotic stresses negative affects growth and development, causing a massive reduction in global agricultural production. Rapeseed (Brassica napus L.) is a major oilseed crop because of its economic value and oilseed production. However, its productivity has been reduced by many environmental adversities. Therefore, it is a prime need to grow rapeseed cultivars, which can withstand numerous …	Rejected	Review
MYB' + 'gene express'+ 'drought stress' + ' plants'+ 'PGPR'	Google scholar	Seed Priming with Phytohormones: An Effective Approach for the Mitigation of Abiotic Stress	Rhaman et al., 2021	Plants are often exposed to abiotic stresses such as drought, salinity, heat, cold, and heavy metals that induce complex responses, which result in reduced growth as well as crop yield. Phy- tohormones are well known for their regulatory role in plant growth and development, and they serve as important chemical messengers, allowing plants to function during exposure to various stresses. Seed prim…	Rejected	Review
MYB' + 'gene express'+ 'drought stress' + ' plants'+ 'PGPR'	Google scholar	Defining plant growth promoting rhizobacteria molecular and biochemical networks in beneficial plant-microbe interactions	Rosier et al., 2018	Background Our knowledge of plant beneficial bac- teria in the rhizosphere is rapidly expanding due to intense interest in utilizing these types of microbes in agriculture. Laboratory and field studies consistently document the growth, health and protective benefits conferred to plants by applying plant growth promot- ing rhizobacteria (PGPR). PGPR exert their influence on other species, includin…	Rejected	Review
MYB' + 'gene express'+ 'drought stress' + ' plants'+ 'PGPR'	Google scholar	Principles of Plant-Microbe Interactions	Ryu et al., 2015		Rejected	Book
MYB' + 'gene express'+ 'drought stress' + ' plants'+ 'PGPR'	Google scholar	Recent Advances in PGPR and Molecular Mechanisms Involved in Drought Stress Resistance	Sati et al., 2021	Increased severity of droughts, due to anthropogenic activities and global warming, has imposed a severe threat on agri- cultural productivity. This has escalated the need for environmentally sustainable solutions to secure global food security. In this context, the application of plant growth-promoting rhizobacteria (PGPR) can be beneficial. PGPR through various mechanisms viz. osmotic adjustmen…	Rejected	Review
MYB' + 'gene express'+ 'drought stress' + ' plants'+ 'PGPR'	Google scholar	Role of plant-microbe interactions on abiotic stress tolerance in plants: A review	Rai et al., 2019	Plants are continuously exposed to a wide array of environmental stresses. Abiotic stress is one of the foremost limiting factors that are responsible for low agricultural productivity. The incidence of extreme events like prolonged drought, salinity, intense rain and flooding, heat wave and frost damage, metal toxicities in problematic soils are increasing day by day under the scenario of changi…	Rejected	Review
MYB' + 'gene express'+ 'drought stress' + ' plants'+ 'PGPR'	Google scholar	RNA-Seq based global transcriptome analysis of rice unravels the key players associated with brown planthopper resistance	Satturu et al., 2021	Rice production is adversely affected by biotic and abiotic stresses. Among the biotic stresses, brown planthopper (BPH) majorly affects the rice yield. Comprehending the genome and candidate players is essential for the resistance to BPH. This holistic study aimed to dissect the complex BPH resistance mechanism of the host against pathogen. Transcriptome analysis of six samples comprising of two…	Rejected	Review
MYB' + 'gene express'+ 'drought stress' + ' plants'+ 'PGPR'	Google scholar	Differential gene expression profiling through transcriptome approach of Saccharum spontaneum L. under low temperature stress reveals genes potentially involved in cold acclimation	Selvarajan et al., 2018	Sugarcane (Saccharum sp.) is predominantly grown in both tropics and subtropics in India, and the subtropics alone contribute more than half of sugarcane production. Sugarcane active growth period in subtropics is restricted to 8–9 months mainly due to winter’s low temperature stress prevailing during November to February every year. Being a commercial crop, toler- ance to low temperature is impo…	Rejected	No PGPR
MYB' + 'gene express'+ 'drought stress' + ' plants'+ 'PGPR'	Google scholar	Drought‐mitigating Pseudomonas putida Strain Modulates Polyamine Catabolism in Arabidopsis thaliana	Sen et al., 2022	Plant growth-promoting rhizobacteria often play a significant role in alleviating drought stress in plants by colonizing the rhizosphere through myriad mechanisms. We have previously reported that the drought-mitigating rhizobacterium, Pseudomonas putida GAP-P45, modulates polyamine biosynthetic gene expression and cellular accumulation of polyam- ines (putrescine, spermidine, and spermine) in wa…	Rejected	No MYB
MYB' + 'gene express'+ 'drought stress' + ' plants'+ 'PGPR'	Google scholar	The expression of proline production/degradation genes under salinity and cadmium stresses in Triticum aestivum inoculated with Pseudomonas sp.	Shavalikohshori et al., 2020	Soil pollution with heavy metals (such as Cd) and soil salinity are two important problems concerning the agricultural production with negative effect on crop quantity and quality in many parts of the world. Current research evaluated the expression of production/degradation genes in Triticum aestivum var. ‘Chamran’ inoculated with Pseudomonas sp. and exposed it to salinity (EC = 3, 10, and 16 dS…	Rejected	No MYB
MYB' + 'gene express'+ 'drought stress' + ' plants'+ 'PGPR'	Google scholar	Microbiome in Plant Health and Disease	Shinwari et al., 2019	Microbiome in Plant Health and Disease Challenges and Opportunities	Rejected	Book
MYB' + 'gene express'+ 'drought stress' + ' plants'+ 'PGPR'	Google scholar	Improved Salinity Tolerance of Arachis hypogaea (L.) by the Interaction of Halotolerant Plant-Growth-Promoting Rhizobacteria	Shukla et al., 2012	Salinity adversely affects plant growth and development. Halotolerant plant-growth-promoting rhizobacteria (PGPR) alleviate salt stress and help plants to maintain better growth. In the present study, six PGPR strains were analyzed for their involvement in salt-stress tolerance in Arachis hypogaea. Different growth parameters, electrolyte leakage, water content, biochemical properties, and ion co…	Rejected	No MYB
MYB' + 'gene express'+ 'drought stress' + ' plants'+ 'PGPR'	Google scholar	Overexpression of a novel SbMYB15 from Salicornia brachiata confers salinity and dehydration tolerance by reduced oxidative damage and improved photosynthesis in transgenic tobacco	Shukla et al., 2015	MYBs are the master regulators of various metabolic processes and stress responses in plants. In this study, we functionally characterised a R2R3-type SbMYB15 transcription factor (TF) from the extreme halophyte Salicornia brachiata. The SbMYB15 acts as a transcriptional activator. Transcriptional analysis showed that SbMYB15 transcript was strongly upregulated in red shoots and was also induced …	Rejected	No PGPR
MYB' + 'gene express'+ 'drought stress' + ' plants'+ 'PGPR'	Google scholar	Antioxidants in Plant-Microbe Interaction	Singh et al., 2019	Antioxidants in Plant- Microbe Interaction	Rejected	Book
MYB' + 'gene express'+ 'drought stress' + ' plants'+ 'PGPR'	Google scholar	Plant Growth Promoting Rhizobacteria for Sustainable Stress Management Volume 1: Rhizobacteria in Abiotic Stress Management	Singh et al., 2019		Rejected	Book
MYB' + 'gene express'+ 'drought stress' + ' plants'+ 'PGPR'	Google scholar	Environmental Biotechnology: For Sustainable Future	Sattiraju et al., 2019		Rejected	Book
MYB' + 'gene express'+ 'drought stress' + ' plants'+ 'PGPR'	Google scholar	Role of nanoparticles in crop improvement and abiotic stress management	Singh et al., 2021	Nanoparticles (NPs) possess specific physical and chemical features and they are capable enough to cross cellular barriers and show their effect on living organisms. Their capability to cross cellular barriers have been noticed for their application not only in medicine, electronics, chemical and physical sciences, but also in agriculture. In agriculture, nanotechnology can help to improve the gr…	Rejected	Review
MYB' + 'gene express'+ 'drought stress' + ' plants'+ 'PGPR'	Google scholar	Unlocking the strength of plant growth promoting Pseudomonas in improving crop productivity in normal and challenging environments: a review	Singh et al., 2022	The widespread use of biofertilizers, rather than chemical fertilizers, is significantly more likely to accomplish sustainable agriculture production globally. Plant growth-promoting rhizobacteria (PGPR) are chemical-free alternatives to conventional crop protection in agriculture. Pseudomonas spp. are unique among the PGPR genera in terms of root colonization, nitrogen fixation, production of ex…	Rejected	Review
MYB' + 'gene express'+ 'drought stress' + ' plants'+ 'PGPR'	Google scholar	Transcriptomic profiling of maize (Zea mays L.) seedlings in response to Pseudomonas putida stain FBKV2 inoculation under drought stress	SkZ et al., 2018	Several mechanisms have been proposed for plant growth-promoting rhizobacteria (PGPR)-mediated drought stress tolerance in plants, but little is known about the molecular pathways involved in the drought tolerance promoted by PGPR. We, therefore, aim to study the differential gene response between Pseudomonas putida strain FBKV2 and maize interaction under drought stress using Illumina sequencing…	Rejected	No MYB
MYB' + 'gene express'+ 'drought stress' + ' plants'+ 'PGPR'	Google scholar	Prescience of endogenous regulation in Arabidopsis thaliana by Pseudomonas putida MTCC 5279 under phosphate starved salinity stress condition	Srivastava et al., 2020	phosphorus (p) availability and salinity stress are two major constraints for agriculture productivity. A combination of salinity and p starvation is known to be more deleterious to plant health. plant growth promoting rhizobacteria are known to ameliorate abiotic stress in plants by increasing the availability of different nutrients. However, interaction mechanisms of plant grown under salinity …	Rejected	No MYB
MYB' + 'gene express'+ 'drought stress' + ' plants'+ 'PGPR'	Google scholar	Burkholderia phytofirmans PsJN reduces impact of freezing temperatures on photosynthesis in Arabidopsis thaliana	Su et al., 2015	Several plant growth-promoting rhizobacteria (PGPR) are known to improve plant tolerance to multiple stresses, including low temperatures. However, mechanisms underlying this protection are still poorly understood. The aim of this study was to evaluate the role of the endophytic PGPR, Burkholderia phytofirmans strain PsJN (Bp PsJN), on Arabidopsis thaliana cold tolerance using photosynthesis para…	Rejected	No MYB
MYB' + 'gene express'+ 'drought stress' + ' plants'+ 'PGPR'	Google scholar	Spatio-temporal dynamics in global rice gene expression (Oryza sativa L.) in response to high ammonium stress	Sun et al., 2017	Ammonium (NH4 + ) is the predominant nitrogen (N) source in many natural and agricultural ecosystems, including flooded rice fields. While rice is known as an NH4 + -tolerant species, it nevertheless suffers NH4 + toxicity at elevated soil concentrations. NH4 + excess rapidly leads to the disturbance of various physiolog- ical processes that ultimately inhibit shoot and root growth. However, the …	Rejected	No PGPR
MYB' + 'gene express'+ 'drought stress' + ' plants'+ 'PGPR'	Google scholar	Wheat Production in Changing Environments Responses, Adaptation and Tolerance	Talaat et al., 2019		Rejected	Book
MYB' + 'gene express'+ 'drought stress' + ' plants'+ 'PGPR'	Google scholar	UV radiation priming: A means of amplifying the inherent potential for abiotic stress tolerance in crop plants	Thomas et al., 2017	The emerging concept, that agricultural crops become more hardy on exposure to low levels of UV radiation, has directed the thoughts towards utilizing the same for priming the seeds/seedlings of crop plants to counter abiotic stresses. The exposure of seeds to UV is an ecologically safe method to improve plant productivity, yield quality and also to enhance the tolerance of plants to various biot…	Rejected	Review
MYB' + 'gene express'+ 'drought stress' + ' plants'+ 'PGPR'	Google scholar	Paenibacillus pabuli strain P7S promotes plant growth and induces anthocyanin accumulation in Arabidopsis thaliana	Trinh et al., 2018	In this study, a novel plant growth-promoting rhizobacteria (PGPR), the bacterial strain Paenibacillus pabuli P7S (PP7S), showed promising plant growth-promoting effects. Furthermore, it induced anthocyanin accumulation in Arabidopsis. When co-cultivated with PP7S, there was a significant increase in anthocyanin content and biomass of Arabidopsis seedlings compared with those of the control. The …	Rejected	No Abiotic stress
MYB' + 'gene express'+ 'drought stress' + ' plants'+ 'PGPR'	Google scholar	Fab Advances in Fabaceae for Abiotic Stress Resilience: From ‘Omics’ to Artificial Intelligence	Singh et al., 2021	Legumes are a better source of proteins and are richer in diverse micronutrients over the nutritional profile of widely consumed cereals. However, when exposed to a diverse range of abiotic stresses, their overall productivity and quality are hugely impacted. Our limited understanding of ge- netic determinants and novel variants associated with the abiotic stress response in food legume crops res…	Rejected	Review
MYB' + 'gene express'+ 'drought stress' + ' plants'+ 'PGPR'	Google scholar	A unified mechanism of action for volatile isoprenoids in plant abiotic stress	Vickers et al., 2009	The sessile nature of plants has resulted in the evolution of an extraordinarily diverse suite of protective mechanisms against biotic and abiotic stresses. Though volatile isoprenoids are known to be involved in many types of biotic interactions, they also play important but relatively unappreciated roles in abiotic stress responses. We review those roles, discuss the proposed mechanistic explan…	Rejected	Review
MYB' + 'gene express'+ 'drought stress' + ' plants'+ 'PGPR'	Google scholar	A Consortium of Three Plant Growth-Promoting Rhizobacterium Strains Acclimates Lycopersicon esculentum and Confers a Better Tolerance to Chilling Stress	Wang et al., 2016	Using beneficial microorganisms has emerged as a potential new solution to induce resistance to biotic and abiotic stress tolerance in several plant species. BBS is a consortium of three plant growth-promoting rhizobacterium (PGPR) strains (Bacillus cereus AR156, B. subtilis SM21, and Serratia sp. XY21) we screened for soil-borne disease control and registered as a biofertilizer that was recently…	Rejected	No MYB
MYB' + 'gene express'+ 'drought stress' + ' plants'+ 'PGPR'	Google scholar	Enhanced Iron and Selenium Uptake in Plants by Volatile Emissions of Bacillus amyloliquefaciens (BF06)	Wang et al., 2017	Volatile organic compounds (VOCs) released by plant growth-promoting rhizobacteria (PGPR) are involved in promoting growth and triggering systemic resistance (ISR) in plants. Importantly, the release of VOCs by some PGPR strains confers improved plant uptake of nutrient elements from the soil. However, the underlying mechanisms of VOCs-regulated nutrient acquisition remain elusive. In this study,…	Rejected	No MYB
MYB' + 'gene express'+ 'drought stress' + ' plants'+ 'PGPR'	Google scholar	Jasmonates: biosynthesis, perception, signal transduction and action in plant stress response, growth and development. An update to the 2007 review in Annals of Botany	Wasternack et al., 2013	Background Jasmonates are important regulators in plant responses to biotic and abiotic stresses as well as in development. Synthesized from lipid-constituents, the initially formed jasmonic acid is converted to different metabolites including the conjugate with isoleucine. Important new components of jasmonate signalling includ- ing its receptor were identified, providing deeper insight into the…	Rejected	Review
MYB' + 'gene express'+ 'drought stress' + ' plants'+ 'PGPR'	Google scholar	Priming and Pretreatment of Seeds and Seedlings Implication in Plant Stress Tolerance and Enhancing Productivity in Crop Plants	Ullah et al., 2019		Rejected	Book
MYB' + 'gene express'+ 'drought stress' + ' plants'+ 'PGPR'	Google scholar	Secondary metabolites in the drought stress tolerance of crop plants: A review	Yadav et al., 2012	Plants encounter various abiotic stresses under field conditions. Among them, drought stress adversely affects crop productivity and threatens global food security. Drought stress triggers downstream pathways such as phytohormone homeostasis and their signaling pathways. Consequently, this initiates the biosynthesis of different types of protective secondary metabolites (SMs). SMs provide multist…	Rejected	Review
MYB' + 'gene express'+ 'drought stress' + ' plants'+ 'PGPR'	Google scholar	Role of PGPR to improve potential growth of tomato under saline condition: An overview	Zameer et al., 2015	Salinity is an important and potential abiotic stress that caused reduction in yield and potential of crop plants throughout the world. It has been reported from various studies that as salinity is increased, the morphological trait like leaf length, leaf weight, number of leaves, leaf surface area; physiological traits, like transpiration rate, stomata conductance, photosynthetic rate, leaf temp…	Rejected	Review
MYB' + 'gene express'+ 'drought stress' + ' plants'+ 'PGPR'	Google scholar	Response to saline stress and aquaporin expression in Azospirillum-inoculated barley seedlings	Zawoznik et al., 2011	The ability of two strains of Azospirillum brasi- lense to mitigate NaCl stress in barley plants was evaluated. Barley seedlings were inoculated and subjected to 200 mM NaCl for 18 days. Several days after NaCl treatment, a significant decline in biomass as well as in height was observed in uninoculated plants. However, smaller reduc- tions in biomass and height were detected in plants inoculated…	Rejected	No MYB
MYB' + 'gene express'+ 'drought stress' + ' plants'+ 'PGPR'	Google scholar	Mechanisms of the IAA and ACC- deaminase producing strain of Trichoderma longibrachiatum T6 in enhancing wheat seedling tolerance to NaCl stress	Zhang et al., 2019	Background: Trichoderma species, a class of plant beneficial fungi, may provide opportunistic symbionts to induce plant tolerance to abiotic stresses. Here, we determined the possible mechanisms responsible for the indole acetic acid (IAA) and 1-aminocyclopropane-1-carboxylate-deaminase (ACC-deaminase) producing strain of Trichoderma longibrachiatum T6 (TL-6) in promoting wheat (Triticum aestivum…	Rejected	Fungi
MYB' + 'gene express'+ 'drought stress' + ' plants'+ 'PGPR'	Google scholar	Improving crop drought resistance with plant growth regulators and rhizobacteria: Mechanisms, applications, and perspectives	Zhang et al., 2021	Drought is one of the main abiotic stresses that cause crop yield loss. Improving crop yield under drought stress is a major goal of crop breeding, as it is critical to food security. The mechanism of plant drought resistance has been well studied, and diverse drought resistance genes have been identified in recent years, but transferring this knowledge from the laboratory to field production rem…	Rejected	Review
MYB' + 'gene express'+ 'drought stress' + ' plants'+ 'PGPR'	Google scholar	Overexpression of BpERF1.1 in Betula Platyphylla enhanced tolerance to multiple abiotic stresses	Zhang et al., 2022	Cold, salt and drought are the main environmen- tal stresses affecting plant growth and crop yield. ERF1, a member of the well-studied ERF gene family, has been proven to play an important role in abiotic stress in plants. In this study, an ERF1, BpERF1.1, was overexpressed in birch (Betula Platyphylla Suk.) and 11 transgenic lines were obtained. Effects of cold, salt and drought treatments were …	Rejected	No PGPR
MYB' + 'gene express'+ 'drought stress' + ' plants'+ 'PGPR'	Google scholar	Bacillus amyloliquefaciens SN16-1-Induced Resistance System of the Tomato against Rhizoctonia solani	Zhao et al., 2021	Tomato (Solanum lycopersicum), as an important economical vegetable, is often infected with Rhizoctonia solani, which results in a substantial reduction in production. Therefore, the molecular mechanism of biocontrol microorganisms assisting tomato to resist pathogens is worth exploring. Here, we use Bacillus amyloliquefaciens SN16-1 as biocontrol bacteria, and employed RNA-Seq technol- ogy to st…	Rejected	Biotic stress
MYB' + 'gene express'+ 'drought stress' + ' plants'+ 'PGPR'	Google scholar	Regulation of drought stress in plants	Zia et al., 2020		Rejected	Chapter book
MYB' + 'gene express'+ 'drought stress' + ' plants'+ 'PGPR'	Google scholar	Plant Growth Promoting Rhizobacteria Protect Wheat Plants Against Temperature Stress Through Antioxidant Signalling and Reducing Chloroplast and Membrane Injury	Sarkar et al., 2018	In India and other tropics, wheat plants suffer from exposure to high temperature with heat increase above 35 °C causing stress-like conditions. Hence, the present study was aimed to determine a means of suitable eco-friendly temperature stress alleviation for growth of wheat. Seeds of two wheat (Triticum aestivum L.) cultivars were primed with two potential plant growth promoting rhizobacteria (…	Rejected	No MYB
MYB' + 'gene express'+ 'drought stress' + ' plants'+ 'PGPR'	Google scholar	Gene expression and metabolite analysis in barley inoculated with net blotch fungus and plant growth-promoting rhizobacteria	Backes et al., 2021	Net blotch, caused by the ascomycete Drechslera teres, can compromise barley production. Beneficial bacteria strains are of substantial interest as biological agents for plant protection in agriculture. Belonging to the genus Paraburkholderia, a bacterium, referred to as strain B25, has been identified as protective for barley against net blotch. The strain Paraburkholderia phytofirmans (strain P…	Rejected	No Abiotic stress
MYB' + 'gene express'+ 'drought stress' + ' plants'+ 'PGPR'	Google scholar	Plant phenolics: Recent advances on their biosynthesis, genetics, and ecophysiology	Cheynier et al., 2013	Land-adapted plants appeared between about 480 and 360 million years ago in the mid-Palaeozoic era, originating from charophycean green algae. The successful adaptation to land of these prototypes of amphibious plants e when they emerged from an aquatic environment onto the land e was achieved largely by massive formation of “phenolic UV light screens”. In the course of evolution, plants have dev…	Rejected	Review
MYB' + 'gene express'+ 'drought stress' + ' plants'+ 'PGPR'	Google scholar	Evaluation of Pseudomonas sp. for its multifarious plant growth promoting potential and its ability to alleviate biotic and abiotic stress in tomato (Solanum lycopersicum) plants	Pandey et al., 2020	1-Aminocyclopropane-1-carboxylate (ACC) deaminase activity is one of the most beneficial traits of plant growth promoting (PGP) rhizobacteria responsible for protecting the plants from detrimental effects of abiotic and biotic stress. The strain S3 with ACC deaminase activity (724.56 nmol α-ketobutyrate mg−1 protein hr−1) was isolated from rhizospheric soil of turmeric (Curcuma longa), a medicina…	Rejected	No MYB
MYB' + 'gene express'+ 'drought stress' + ' plants'+ 'PGPR'	Google scholar	Exploring plant rhizobacteria synergy to mitigate abiotic stress: a new dimension toward sustainable agriculture	Prakash et al., 2020		Rejected	Chapter book
MYB' + 'gene express'+ 'drought stress' + ' plants'+ 'PGPR'	Google scholar	Characterization of the Nrt2.6 Gene in Arabidopsis thaliana: A Link with Plant Response to Biotic and Abiotic Stress	Dechorgnat et al., 2012	The high affinity nitrate transport system in Arabidopsis thaliana involves one gene and potentially seven genes from the NRT1 and NRT2 family, respectively. Among them, NRT2.1, NRT2.2, NRT2.4 and NRT2.7 proteins have been shown to transport nitrate and are localized on the plasmalemma or the tonoplast membranes. NRT2.1, NRT2.2 and NRT2.4 play a role in nitrate uptake from soil solution by root c…	Rejected	No MYB
MYB' + 'gene express'+ 'drought stress' + ' plants'+ 'PGPR'	Google scholar	Comparing the growth-promoting potential of Paenibacillus lentimorbus and T Bacillus amyloliquefaciens in Oryza sativa L. var. Sarju-52 under suboptimal nutrient conditions	Bisht et al., 2020	An adequate supply of mineral nutrients is crucial to obtain optimum productivity in agriculture. The present investigation was carried to find the inoculation effect of plant growth-promoting rhizobacteria (PGPR), i.e., Paenibacillus lentimorbus B-30488 (B-30488), Bacillus amyloliquefaciens SN13 (SN13) and their consortium for the growth of rice var. Sarju-52, grown under suboptimal nutrient con…	Rejected	No drought stress
MYB' + 'gene express'+ 'drought stress' + ' plants'+ 'PGPR'	Google scholar	Transcriptome Analysis of Induced Systemic Drought Tolerance Elicited by Pseudomonas chlororaphis O6 in Arabidopsis thaliana	Cho et al., 2013	Root colonization by Pseudomonas chlororaphis O6 induces systemic drought tolerance in Arabidopsis thaliana. Microarray analysis was performed using the 22,800- gene Affymetrix GeneChips to identify differentially- expressed genes from plants colonized with or without P. chlororaphis O6 under drought stressed conditions or normal growth conditions. Root colonization in plants grown under regular …	Rejected	duplicate
MYB' + 'gene express'+ 'drought stress' + ' plants'+ 'PGPR'	Google scholar	Potential of plant growth-promoting rhizobacteria-plant interactions in mitigating salt stress for sustainable agriculture: A review	KUMAWAT et al., 2022	Soil salinization affecting different crops is one of the serious threats to global food security. Soil salinity affects 20% and 33% of the total cultivated and irrigated agricultural lands, respectively, and has been reported to caused a global crop production loss of 27.3 billion USD. The conventional approaches, such as using salt-tolerant varieties, saline soil scrapping, flushing, leaching, …	Rejected	Review
MYB' + 'gene express'+ 'drought stress' + ' plants'+ 'PGPR'	Google scholar	Nitrogen fertility and abiotic stresses management in cotton crop: a review	Khan et al., 2017	This review outlines nitrogen (N) responses in crop production and potential management decisions to ameliorate abiotic stresses for better crop production. N is a primary constituent of the nucleotides and proteins that are essential for life. Production and application of N fertilizers consume huge amounts of energy, and excess is detrimental to the en- vironment. Therefore, increasing plant N …	Rejected	Review
MYB' + 'gene express'+ 'drought stress' + ' plants'+ 'PGPR'	Google scholar	Physiological and molecular changes in plants grown at low temperatures	Theocharis et al., 2012	Apart from water availability, low temperature is the most important environmental factor limiting the productivity and geographical distribution of plants across the world. To cope with cold stress, plant species have evolved several physiological and molecular adaptations to maximize cold tolerance by adjusting their metabolism. The regulation of some gene products represents an addi- tional me…	Rejected	Review
MYB' + 'gene express'+ 'drought stress' + ' plants'+ 'PGPR'	Google scholar	Microbial inoculation in rice regulates antioxidative reactions and defense related genes to mitigate drought stress	Singh et al., 2020		Rejected	Duplicate
MYB' + 'gene express'+ 'drought stress' + ' plants'+ 'PGPR'	Google scholar	Bacillus amyloliquefaciens inoculation alters physiology of rice (Oryza sativa L. var. IR-36) through modulating carbohydrate metabolism to mitigate stress induced by nutrient starvation	Bisht et al., 2020		Rejected	Duplicate
MYB' + 'gene express'+ 'drought stress' + ' plants'+ 'PGPR'	Google scholar	Seed priming for abiotic stress tolerance: an overview	Jisha et al., 2013	Plants are exposed to any number of potentially adverse environmental conditions such as water deficit, high salinity, extreme temperature, submergence, etc. These abiotic stresses adversely affect the plant growth and pro- ductivity. Nowadays various strategies are employed to generate plants that can withstand these stresses. In recent years, seed priming has been developed as an indispensable …	Rejected	Review
MYB' + 'gene express'+ 'drought stress' + ' plants'+ 'PGPR'	Google scholar	microRNA 166: an evolutionarily conserved stress biomarker in land plants targeting HD-ZIP family	Yadav et al., 2021		Rejected	Duplicate
MYB' + 'gene express'+ 'drought stress' + ' plants'+ 'PGPR'	Google scholar	Identification of drought responsive Elaeis guineensis WRKY transcription factors with sensitivity to other abiotic stresses and hormone treatments	Lee et al., 2022		Rejected	Duplicate
MYB' + 'gene express'+ 'drought stress' + ' plants'+ 'PGPR'	Google scholar	Role of ACC deaminase producing bacteria for abiotic stress management and sustainable agriculture production	Chandwani et al., 2022	Plants are immobile and are exposed to various biotic and abiotic stresses, including heat, cold, drought, flooding, nutrient deficiency, heavy metal exposure, phytopathogens, and pest attacks. The stressors significantly affect agricultural productivity when exceed a certain threshold. It has been reported that most of the stressed plants are reported to have increased ethylene synthesis from it…	Rejected	Review
MYB' + 'gene express'+ 'drought stress' + ' plants'+ 'PGPR'	Google scholar	Plant Growth Promoting Rhizobacteria, Arbuscular Mycorrhizal Fungi and Their Synergistic Interactions to Counteract the Negative Effects of Saline Soil on Agriculture: Key Macromolecules and Mechanisms	Sagar et al., 2021		Rejected	Duplicate
MYB' + 'gene express'+ 'drought stress' + ' plants'+ 'PGPR'	Google scholar	Plant growth promoting rhizobacteria are more effective under drought: a meta-analysis	Rubin et al., 2017		Rejected	Duplicate
MYB' + 'gene express'+ 'drought stress' + ' plants'+ 'PGPR'	Google scholar	The walnut JrVHAG1 gene is involved in cadmium stress response through ABA-signal pathway and MYB transcription regulation	Xu et al., 2018		Rejected	Duplicate
MYB' + 'gene express'+ 'drought stress' + ' plants'+ 'PGPR'	Google scholar	Jasmonic acid signalling and the plant holobiont	Carvalhais et al., 2017		Rejected	Duplicate
MYB' + 'gene express'+ 'drought stress' + ' plants'+ 'PGPR'	Google scholar	Abiotic and biotic stress interactions in plants: A cross-tolerance perspective	Ramegowda et al., 2017		Rejected	Chapter book
