# Supplementary material for: Meta-analysis of plant growth-promoting rhizobacteria interaction with host plants: implications for drought stress response gene expression
Source: Front Plant Sci. 2024 Jan 15;14:1282553. doi: 10.3389/fpls.2023.1282553 (PMC10823023; doi:10.3389/fpls.2023.1282553)
Supplement: Supplementary file 20 [file Table_5.xlsx]

## Sheet: Foglio1
Keywords	Source	Title	Author	Abstract	Accepted/Rejected	Reason
MYC'+ 'gene expression'+ 'drought stress' + ' plants'+ 'PGPR'	Google scholar	Genome-wide identification and expression analysis of Arabidopsis GRAM-domain containing gene family in response to abiotic stresses and PGPR treatment	Tiwari et al., 2021	Characterization of stress-responsive genes is important to understand the genomics perspective of stress toler- ance. In this purview, several gene-families are being identified and characterized in the model and non-model plant species, which has greatly enhanced the knowledge of molecular intricacies associated with stress toler- ance. One such gene family is the GRAM-domain containing which h…	Rejected	No MYC
MYC'+ 'gene expression'+ 'drought stress' + ' plants'+ 'PGPR'	Google scholar	Recent methods of drought stress tolerance in plants	Ali et al., 2017	In the climate change scenario the drought has been diagnosed as major stress affecting crop productivity. This review demonstrates some recent findings on the amelioration of drought stress. Nanoparticles, synthetic growth regulators viz. Trinexapacethyl, and Biochar addition helps to economize the water budget of plants, enhances the bioavailability of water and nutrients as well as overcomes d…	Rejected	Review
MYC'+ 'gene expression'+ 'drought stress' + ' plants'+ 'PGPR'	Google scholar	Crosstalk amongst phytohormones from planta and PGPR under biotic and abiotic stresses	Khan et al., 2020	Phytohormones are endogenously produced organic substances indispensable for regulating plant growth and yield and also play major role in inducing tolerance to plants against various biotic and abiotic stresses. The convergence points among hormone signal transduction cascades are considered as cross-talk which are crucial for plant development as well as for plant responses to biotic and abioti…	Rejected	Review
MYC'+ 'gene expression'+ 'drought stress' + ' plants'+ 'PGPR'	Google scholar	Role of DREB transcription factors in abiotic and biotic stress tolerance in plants	Agarwal et al., 2006	Abiotic and biotic stresses negatively influence survival, biomass production and crop yield. Being multi- genic as well as a quantitative trait, it is a challenge to understand the molecular basis of abiotic stress tolerance and to manipulate it as compared to biotic stresses. Lately, some transcription factor(s) that regulate the expression of several genes related to stress have been discovere…	Rejected	Review
MYC'+ 'gene expression'+ 'drought stress' + ' plants'+ 'PGPR'	Google scholar	Microbial Interventions in Agriculture and Environment	Arora et al., 2019		Rejected	Book
MYC'+ 'gene expression'+ 'drought stress' + ' plants'+ 'PGPR'	Google scholar	Mechanisms of Abscisic Acid-Mediated Drought Stress Responses in Plants	Aslam et al., 2022	Drought is one of the major constraints to rain-fed agricultural production, especially under climate change conditions. Plants evolved an array of adaptive strategies that perceive stress stimuli and respond to these stress signals through specific mechanisms. Abscisic acid (ABA) is a premier signal for plants to respond to drought and plays a critical role in plant growth and development. ABA t…	Rejected	Review
MYC'+ 'gene expression'+ 'drought stress' + ' plants'+ 'PGPR'	Google scholar	Phyto-Microbiome in Stress Regulation	Basu et al., 2020		Rejected	Book
MYC'+ 'gene expression'+ 'drought stress' + ' plants'+ 'PGPR'	Google scholar	Biofilm formation and regulation of salicylic acid-inducible genes expression in Arabidopsis by Algerian indigenous bacteria from wheat and potatoes rhizospheres in semi-arid Sétif region	Benslim et al., 2018	45 bacterial isolates from potatoes and wheat rhizospheres near Sétif (Algeria) pre-selected for their antagonistic activity against three fungal plant pathogens, two necrotrophic Fusarium solani var. coeruleum and Phytophtora infestans, and a systemic F. oxysporum f. sp. albedinis. Molecular typing of the isolates showed abundance of Bacillus compared to Pseu- domonas. Some of the tested strains…	Rejected	No MYC
MYC'+ 'gene expression'+ 'drought stress' + ' plants'+ 'PGPR'	Google scholar	Biofertilizers function as key player in sustainable agriculture by improving soil fertility, plant tolerance and crop productivity	Bhardwaj et al., 2014	Current soil management strategies are mainly dependent on inorganic chemical-based fertilizers, which caused a serious threat to human health and environment. The exploitation of beneficial microbes as a biofertilizer has become paramount importance in agriculture sector for their potential role in food safety and sustainable crop production. The eco-friendly approaches inspire a wide range of a…	Rejected	Review
MYC'+ 'gene expression'+ 'drought stress' + ' plants'+ 'PGPR'	Google scholar	Communication of plants with microbial world: Exploring the regulatory networks for PGPR mediated defense signaling	Bukhat et al., 2020	Agricultural manipulation of potentially beneficial rhizosphere microbes is increasing rapidly due to their multi- functional plant-protective and growth related benefits. Plant growth promoting rhizobacteria (PGPR) are mostly non-pathogenic microbes which exert direct benefits on plants while there are rhizosphere bacteria which indirectly help plant by ameliorating the biotic and/or abiotic str…	Rejected	Review
MYC'+ 'gene expression'+ 'drought stress' + ' plants'+ 'PGPR'	Google scholar	Advances in Wheat Physiology in Response to Drought and the Role of Plant Growth Promoting Rhizobacteria to Trigger Drought Tolerance	Camaille et al., 2021	In the coming century, climate change and the increasing human population are likely lead- ing agriculture to face multiple challenges. Agricultural production has to increase while preserving natural resources and protecting the environment. Drought is one of the major abiotic problems, which limits the growth and productivity of crops and impacts 1–3% of all land.To cope with unfavor- able wate…	Rejected	review
MYC'+ 'gene expression'+ 'drought stress' + ' plants'+ 'PGPR'	Google scholar	Jasmonic acid signalling and the plant holobiont	Carvalhais et al., 2017	The plant holobiont – which is the plant and its associated microbiome – is increasingly viewed as an evolving entity. Some interacting microbes that compose the microbiome assist plants in combating pathogens and herbivorous insects. However, knowledge of the factors that influence the microbiome in the context of defence signalling pathways is still in its infancy. Recent research reported that…	Rejected	Review
MYC'+ 'gene expression'+ 'drought stress' + ' plants'+ 'PGPR'	Google scholar	Bio-priming of seeds: Plant stress management and its underlying cellular, biochemical and molecular mechanisms	Chakraborti et al., 2022	Exposure of crops to stress is the most significant barrier to agricultural output and food security worldwide. Stress induces changes in plants’ physiological functions, which leads to lower plant growth and agricultural yield. Plants undergo a variety of molecular, cellular, and physiological changes to combat various abiotic stresses. Plants suffer from increased osmotic pressure outside the r…	Rejected	Review
MYC'+ 'gene expression'+ 'drought stress' + ' plants'+ 'PGPR'	Google scholar	Targeting transcription factors for plant disease resistance: shifting paradigm	Chattopadhyay et al., 2019	Transcription factors (TFs) are regulatory proteins that have the ability to alter targeted gene expression either solely by themselves or as a part of the protein complex. Many such TFs have significant regulatory role in plant defence. Being master switches for gene regulation, they become the unique candidates for targeting functional hub and dynamic networks and nodes of different defence sig…	Rejected	Review
MYC'+ 'gene expression'+ 'drought stress' + ' plants'+ 'PGPR'	Google scholar	Transcriptome Analysis of Induced Systemic Drought Tolerance Elicited by Pseudomonas chlororaphis O6 in Arabidopsis thaliana	Cho et al., 2013	Root colonization by Pseudomonas chlororaphis O6 induces systemic drought tolerance in Arabidopsis thaliana. Microarray analysis was performed using the 22,800- gene Affymetrix GeneChips to identify differentially- expressed genes from plants colonized with or without P. chlororaphis O6 under drought stressed conditions or normal growth conditions. Root colonization in plants grown under regular …	Accepted
MYC'+ 'gene expression'+ 'drought stress' + ' plants'+ 'PGPR'	Google scholar	In Silico Study of the RSH (RelA/SpoT Homologs) Gene Family and Expression Analysis in Response to PGPR Bacteria and Salinity in Brassica napus	D ̨abrowska et al., 2021	Among several mechanisms involved in the plant stress response, synthesis of guanosine tetra and pentaphosphates (alarmones), homologous to the bacterial stringent response, is of crucial importance. Plant alarmones affect, among others, photosynthetic activity, metabolite accumulation, and nutrient remobilization, and thus regulate plant growth and development. The plant RSH (RelA/SpoT homolog) …	Rejected	No drought stress
MYC'+ 'gene expression'+ 'drought stress' + ' plants'+ 'PGPR'	Google scholar	The Foliar Application of Rice Phyllosphere Bacteria induces Drought-Stress Tolerance in Oryza sativa (L.)	Devarajan et al., 2021	This study assessed the potential of Bacillus endophyticus PB3, Bacillus altitudinis PB46, and Bacillus megaterium PB50 to induce drought tolerance in a susceptible rice cultivar. The leaves of the potted rice plants subjected to physical drought stress for 10 days during the flowering stage were inoculated with single-strain suspensions. Control pots of irrigated and drought-stressed plants were…	Rejected	No MYC
MYC'+ 'gene expression'+ 'drought stress' + ' plants'+ 'PGPR'	Google scholar	Recent Molecular Advances on Downstream Plant Responses to Abiotic Stress	dos Reis et al., 2012	Abiotic stresses such as extremes of temperature and pH, high salinity and drought, comprise some of the major factors causing extensive losses to crop production worldwide. Understanding how plants respond and adapt at cellular and molecular levels to continuous environmental changes is a pre-requisite for the generation of resistant or tolerant plants to abiotic stresses. In this review we aime…	Rejected	Review
MYC'+ 'gene expression'+ 'drought stress' + ' plants'+ 'PGPR'	Google scholar	Delineation of mechanistic approaches of rhizosphere microorganisms facilitated plant health and resilience under challenging conditions	Dukare et al., 2022	Sustainable agriculture demands the balanced use of inorganic, organic, and microbial biofertilizers for enhanced plant productivity and soil fertility. Plant growth-enhancing rhizospheric bacteria can be an excellent biotechnological tool to augment plant productivity in different agricultural setups. We present an overview of microbial mechanisms which directly or indirectly contribute to plant…	Rejected	Review
MYC'+ 'gene expression'+ 'drought stress' + ' plants'+ 'PGPR'	Google scholar	The influence of endophytes on rice fitness under environmental stresses	Ganie et al., 2022	Rice (Oryza sativa) crop is continuously subjected to biotic and abiotic stresses, compromising growth and conse- quently yield. The situation is exacerbated by climate change impacting on ecosystems and biodiversity. Genetic engineering has been used to develop stress-tolerant rice, alongside physical and chemical methods to mitigate the effect of these stresses. However, the success of these st…	Rejected	Review
MYC'+ 'gene expression'+ 'drought stress' + ' plants'+ 'PGPR'	Google scholar	Drought-mitigating Pseudomonas putida GAP-P45 modulates proline turnover and oxidative status in Arabidopsis thaliana under water stress	Ghosh et al., 2018	We had previously reported the impact of Pseudomonas putida GAP-P45 on the morpho-physiological parameters and expres- sion of proline metabolic genes in Arabidopsis thaliana as a response to water-deficit stress as reported by Ghosh et al. (Ann Microbiol 67:655–668, 2017). In this work, we analyzed the impact of P. putida GAP-P45 on proline metabolic enzyme activity, accumulation of reactive oxy…	Rejected	No MYC
MYC'+ 'gene expression'+ 'drought stress' + ' plants'+ 'PGPR'	Google scholar	Piriformospora indica: Potential and Significance in Plant Stress Tolerance	Gill et al., 2016	Owing to its exceptional ability to efficiently promote plant growth, protection and stress tolerance, a mycorrhiza like endophytic Agaricomycetes fungus Piriformospora indica has received a great attention over the last few decades. P. indica is an axenically cultiviable fungus which exhibits its versatility for colonizing/hosting a broad range of plant species through directly manipulating plan…	Rejected	Review
MYC'+ 'gene expression'+ 'drought stress' + ' plants'+ 'PGPR'	Google scholar	The Impact of Beneficial Plant-Associated Microbes on Plant Phenotypic Plasticity	Goh et al., 2013	Plants show phenotypic plasticity in response to changing or extreme abiotic environments; but over millions of years they also have co-evolved to respond to the presence of soil microbes. Studies on phenotypic plasticity in plants have focused mainly on the effects of the changing environments on plants’ growth and survival. Evidence is now accumulating that the presence of microbes can alter pl…	Rejected	Review
MYC'+ 'gene expression'+ 'drought stress' + ' plants'+ 'PGPR'	Google scholar	Transcriptomics of Biostimulation of Plants Under Abiotic Stress	González-Morales et al., 2021	Plant biostimulants are compounds, living microorganisms, or their constituent parts that alter plant development programs. The impact of biostimulants is manifested in several ways: via morphological, physiological, biochemical, epigenomic, proteomic, and transcriptomic changes. For each of these, a response and alteration occur, and these alterations in turn improve metabolic and adaptive perfo…	Rejected	Review
MYC'+ 'gene expression'+ 'drought stress' + ' plants'+ 'PGPR'	Google scholar	Endophytic Microbes and Their Role to Overcome Abiotic Stress in Crop Plants	Gorai et al., 2010		Rejected	Chapter book
MYC'+ 'gene expression'+ 'drought stress' + ' plants'+ 'PGPR'	Google scholar	Mechanistic Insights of Plant Growth Promoting Bacteria Mediated Drought and Salt Stress Tolerance in Plants for Sustainable Agriculture	Gupta et al., 2022	Climate change has devastating effects on plant growth and yield. During ontogenesis, plants are subjected to a variety of abiotic stresses, including drought and salinity, affecting the crop loss (20–50%) and making them vulnerable in terms of survival. These stresses lead to the excessive production of reactive oxygen species (ROS) that damage nucleic acid, proteins, and lipids. Plant growth-pr…	Rejected	Review
MYC'+ 'gene expression'+ 'drought stress' + ' plants'+ 'PGPR'	Google scholar	Transcription Factors Interact with ABA through Gene Expression and Signal	Hussain et al., 2021	Among abiotic stressors, drought and salinity seriously affect crop growth worldwide. In plants, research has aimed to increase stress-responsive protein synthesis upstream or downstream of the various transcription factors (TFs) that alleviate drought and salinity stress. TFs play diverse roles in controlling gene expression in plants, which is necessary to regulate biological processes, such as…	Rejected	Review
MYC'+ 'gene expression'+ 'drought stress' + ' plants'+ 'PGPR'	Google scholar	Rhizosphere Signaling: Insights into Plant–Rhizomicrobiome Interactions for Sustainable Agronomy	Jamil et al., 2022	Rhizospheric plant–microbe interactions have dynamic importance in sustainable agriculture systems that have a reduced reliance on agrochemicals. Rhizosphere signaling focuses on the interac- tions between plants and the surrounding symbiotic microorganisms that facilitate the development of rhizobiome diversity, which is beneficial for plant productivity. Plant–microbe communication comprises in…	Rejected	Review
MYC'+ 'gene expression'+ 'drought stress' + ' plants'+ 'PGPR'	Google scholar	Phosphate-Solubilizing and Auxin-Producing Rhizobacteria Promote Plant Growth Under Saline Conditions	Kadmiri et al., 2018	The world loses 3 ha of arable lands every minute due to salinization. To counteract adverse effects of salinity on plants, the use of PGPR is an efficient/cheaper method that induces salt stress tolerance in plants. The aim of the present work was to study auxin production and inorganic phosphate solubilization capacities of Pseudomonas fluorescens Ms-01 (A newly isolated strain from grapevine r…	Rejected	No MYC
MYC'+ 'gene expression'+ 'drought stress' + ' plants'+ 'PGPR'	Google scholar	Molecular responses to drought stress in plants	Kaur et al., 2019	Drought is a severe environmental constraint to plant productivity. Being a multidimensional stress, it triggers a wide variety of plant responses ranging from physiological, biochemical to molecular levels. One of the inevitable consequences of drought stress is an increase in reactive oxygen species (ROS) production in different cellular compartments, namely the chloroplasts and mitochondria. T…	Rejected	Review
MYC'+ 'gene expression'+ 'drought stress' + ' plants'+ 'PGPR'	Google scholar	Jasmonic Acid in Plant Abiotic Stress Tolerance and Interaction with Abscisic Acid	Kim et al., 2021	The phytohormone jasmonic acid (JA), a cyclopentane fatty acid, mediates plant responses to abiotic stresses. Abiotic stresses rapidly and dynamically affect JA metabolism and JA responses by upregulating the expression of genes involved in JA biosynthesis and signaling, indicating that JA has a crucial role in plant abiotic stress responses. The crucial role of JA has been demonstrated in many p…	Rejected	Review
MYC'+ 'gene expression'+ 'drought stress' + ' plants'+ 'PGPR'	Google scholar	Identification of drought responsive Elaeis guineensis WRKY transcription factors with sensitivity to other abiotic stresses and hormone treatments	Lee et al., 2022	Background: The ability of plants to withstand and thrive in an adverse environment is crucial to ensure their surviv‐ ability and yield performance. The WRKY transcription factors (TFs) have crucial roles in plant growth, development and stress response, particularly drought stress. In oil palm, drought is recognized as one of the major yield limiting factors. However, the roles of WRKY TFs in t…	Rejected	No PGPR
MYC'+ 'gene expression'+ 'drought stress' + ' plants'+ 'PGPR'	Google scholar	Plant Responses to Abiotic Stresses and Rhizobacterial Biostimulants: Metabolomics and Epigenetics Perspectives	Lephatsi et al., 2021	In response to abiotic stresses, plants mount comprehensive stress-specific responses which mediate signal transduction cascades, transcription of relevant responsive genes and the accumulation of numerous different stress-specific transcripts and metabolites, as well as coordinated stress-specific biochemical and physiological readjustments. These natural mechanisms employed by plants are howeve…	Rejected	Review
MYC'+ 'gene expression'+ 'drought stress' + ' plants'+ 'PGPR'	Google scholar	Global Gene Expression Analysis Reveals Crosstalk between Response Mechanisms to Cold and Drought Stresses in Cassava Seedlings	Li et al., 2017	Abiotic stress negatively impacts cassava (Manihot esculenta) growth and yield. Several molecular mechanisms of plant response to cold and drought have been identified and described in the literature, however, little is known about the crosstalk of the responses of cassava to these two stresses. To elucidate this question, transcriptome analysis of cassava seedlings under cold or PEG-simulated dr…	Rejected	No PGPR
MYC'+ 'gene expression'+ 'drought stress' + ' plants'+ 'PGPR'	Google scholar	A Critical Review on Communication Mechanism within Plant-Endophytic Fungi Interactions to Cope with Biotic and Abiotic Stresses	Lu et al., 2021	Endophytic fungi infect plant tissues by evading the immune response, potentially stim- ulating stress-tolerant plant growth. The plant selectively allows microbial colonization to carve endophyte structures through phenotypic genes and metabolic signals. Correspondingly, fungi develop various adaptations through symbiotic signal transduction to thrive in mycorrhiza. Over the past decade, the reg…	Rejected	Review
MYC'+ 'gene expression'+ 'drought stress' + ' plants'+ 'PGPR'	Google scholar	Trichoderma atroviride LU132 promotes plant growth but not induced systemic resistance to Plutella xylostella in oilseed rape	Maag et al., 2014	Several species of the fungus Trichoderma can promote plant health and are widely used as commercial biopesticides. Beneficial effects of this fungus are attributed to various mechanisms such as mycoparasitism, plant-growth promotion, increased stress tolerance and elicitation of induced systemic resistance against pathogens via jasmonic acid/ethyl- ene-dependent pathways. Despite such well-estab…	Rejected	Fungi
MYC'+ 'gene expression'+ 'drought stress' + ' plants'+ 'PGPR'	Google scholar	Microbes and Signaling Biomolecules Against Plant Stress Strategies of Plant- Microbe Relationships for Better Survival	Maithani et al., 2021		Rejected	Book
MYC'+ 'gene expression'+ 'drought stress' + ' plants'+ 'PGPR'	Google scholar	Interactions between arbuscular mycorrhizal fungi and soil bacteria	Miransari et al., 2011	The soil environment is interesting and com- plicated. There are so many interactions taking place in the soil, which determine the properties of soil as a medium for the growth and activities of plants and soil microorganisms. The soil fungi, arbuscular mycorrhiza (AM), are in mutual and beneficial symbiosis with most of the terrestrial plants. AM fungi are continuously interactive with a wide r…	Rejected	Review
MYC'+ 'gene expression'+ 'drought stress' + ' plants'+ 'PGPR'	Google scholar	Defining the combined stress response in wild Arachis	Mota et al., 2021	Nematodes and drought are major constraints in tropical agriculture and often occur simultaneously. Plant responses to these stresses are complex and require crosstalk between biotic and abiotic signaling pathways. In this study, we explored the transcriptome data of wild Arachis species subjected to drought (A‐metaDEG) and the root‐knot nematode Meloidogyne arenaria (B‐metaDEG) via meta‐analysis…	Rejected	Biotic stress
MYC'+ 'gene expression'+ 'drought stress' + ' plants'+ 'PGPR'	Google scholar	Mechanisms and Strategies of Plant Microbiome Interactions to Mitigate Abiotic Stresses	Munir et al., 2022	Abiotic stresses are the most significant factors reducing agricultural productivity. Plants face extreme environmental conditions that may affect their biological mechanisms, thereby influ- encing their growth and development. Microorganisms possess substantial metabolites that aid in helping plants mitigate abiotic stresses. Plants’ interaction with microbes constitutes a diversified ecosystem,…	Rejected	Review
MYC'+ 'gene expression'+ 'drought stress' + ' plants'+ 'PGPR'	Google scholar	Bacterial endophytome‐mediated resistance in banana for the management of Fusarium wilt	Nakkeeran et al., 2021	Banana (Musa spp.), a major cash and staple fruit crop in many parts of the world, is infected by Fusarium wilt, which contributes up to 100% yield loss and causes social consequences. Race 1 and race 2 of Panama wilt caused by Fusarium oxysporum f. sp. cubense (Foc) are prevalent worldwide and seriously affect many traditional varieties. The threat of Foc tropical race 4 (Foc TR4) is looming lar…	Rejected	Review
MYC'+ 'gene expression'+ 'drought stress' + ' plants'+ 'PGPR'	Google scholar	Interaction between arbuscular mycorrhizal fungi and Bacillus spp. in soil enhancing growth of crop plants	Nanjundappa et al., 2019		Rejected	Review
MYC'+ 'gene expression'+ 'drought stress' + ' plants'+ 'PGPR'	Google scholar	miRNAs: Major modulators for crop growth and development under abiotic stresses	Noman et al., 2017	Cumulatively, biotic and abiotic stresses of various magnitudes can decrease the production of crops by 70%. miRNAs have emerged as a genetic tool with enormous potential that can be exploited to understand stress tolerance at the molecular level and eventually regulate stress in crops. Plant miRNA targets frequently fit into diverse families of TFs that control the expression of genes related to…	Rejected	Review
MYC'+ 'gene expression'+ 'drought stress' + ' plants'+ 'PGPR'	Google scholar	Plant Microbiomes for Sustainable Agriculture	Odoh et al., 2016		Rejected	Book
MYC'+ 'gene expression'+ 'drought stress' + ' plants'+ 'PGPR'	Google scholar	Plant Growth Promoting Rhizobacterial Mitigation of Drought Stress in Crop Plants: Implications for Sustainable Agriculture	Ojuederie et al., 2019	Abiotic stresses arising from climate change negates crop growth and yield, leading to food insecurity. Drought causes oxidative stress on plants, arising from excessive production of reactive oxygen species (ROS) due to inadequate CO2, which disrupts the photosynthetic machinery of plants. The use of conventional methods for the development of drought-tolerant crops is time-consuming, and the fu…	Rejected	Review
MYC'+ 'gene expression'+ 'drought stress' + ' plants'+ 'PGPR'	Google scholar	Interkingdom signaling in plant-rhizomicrobiome interactions for sustainable agriculture	Phour et al., 2020	The rhizosphere is a complex ecosystem around plant roots that comprises an integrated network of plant roots, the microbiome and soil. Wide spread communication between prokaryotes and eukaryotes occurs within this integrated network via a complex set of signal molecules secreted during both beneficial and harmful in- teractions. Intra- and inter-species communication among microbes occurs throu…	Rejected	Review
MYC'+ 'gene expression'+ 'drought stress' + ' plants'+ 'PGPR'	Google scholar	Jasmonic acid: a key frontier in conferring abiotic stress tolerance in plants	Raza et al., 2021	Abiotic stresses are the primary sources of crop losses globally. The identification of key mechanisms deployed and estab- lished by plants in response to abiotic stresses is necessary for the maintenance of their growth and persistence. Recent discoveries have revealed that phytohormones or plant growth regulators (PGRs), mainly jasmonic acid (JA), have increased our knowledge of hormonal signal…	Rejected	Review
MYC'+ 'gene expression'+ 'drought stress' + ' plants'+ 'PGPR'	Google scholar	Systems Biology of Plant-Microbiome Interactions	Rodriguez et al., 2019	In natural environments, plants are exposed to diverse microbiota that they interact with in complex ways. While plant–pathogen interactions have been intensely studied to understand defense mechanisms in plants, many microbes and microbial communities can have substantial beneficial effects on their plant host. Such beneficial effects include improved acquisition of nutrients, accelerated growth…	Rejected	Review
MYC'+ 'gene expression'+ 'drought stress' + ' plants'+ 'PGPR'	Google scholar	Genetic, Epigenetic, Genomic and Microbial Approaches to Enhance Salt Tolerance of Plants: A Comprehensive Review	Saradadevi et al., 2021	Globally, soil salinity, which refers to salt-affected soils, is increasing due to various environmental factors and human activities. Soil salinity poses one of the most serious challenges in the field of agriculture as it significantly reduces the growth and yield of crop plants, both quantitatively and qualitatively. Over the last few decades, several studies have been carried out to understan…	Rejected	Review
MYC'+ 'gene expression'+ 'drought stress' + ' plants'+ 'PGPR'	Google scholar	Arbuscular Mycorrhiza-Mediated Regulation of Polyamines and Aquaporins During Abiotic Stress: Deep Insights on the Recondite Players	Sharma et al., 2021	Environmental stresses of (a)biotic origin induce the production of multitudinous compounds (metabolites and proteins) as protective defense mechanisms in plants. On account of the regulation of some of these compounds, arbuscular mycorrhizal fungi (AMF) reinforce the inherent tolerance of plants toward the stress of different origins and kind. This article reviews two specific fundamental mechan…	Rejected	Review
MYC'+ 'gene expression'+ 'drought stress' + ' plants'+ 'PGPR'	Google scholar	Differential regulation of drought stress by biological membrane transporters and channels	Singh et al., 2021	Stress arising due to abiotic factors affects the plant’s growth and productivity. Among several existing abiotic stressors like cold, drought, heat, salinity, heavy metal, etc., drought condition tends to affect the plant’s growth by inducing two-point effect, i.e., it disturbs the water balance as well as induces toxicity by disturbing the ion homeostasis, thus hindering the growth and producti…	Rejected	Review
MYC'+ 'gene expression'+ 'drought stress' + ' plants'+ 'PGPR'	Google scholar	Inter-organismal signaling and management of the phytomicrobiome	Smith et al., 2015	The organisms of the phytomicrobiome use signal compounds to regulate aspects of each other’s behavior. Legumes use signals (flavonoids) to regulate rhizobial nod gene expression during establishment of the legume-rhizobia N2-fixation symbiosis. Lipochitooligosaccharides (LCOs) produced by rhizobia act as return signals to the host plant and are recognized by specific lysine motif receptor like k…	Rejected	Review
MYC'+ 'gene expression'+ 'drought stress' + ' plants'+ 'PGPR'	Google scholar	A multifaceted rhizobacterium Bacillus licheniformis functions as a fungal antagonist and a promoter of plant growth and abiotic stress tolerance	Sukkasem et al., 2018	Plant-growth-promoting rhizobacteria play a beneficial role in plant growth through various mechanisms. In this study, an isolated rhizobacterial strain, Bacillus licheniformis CH102 (hereafter CH102), exhibited antifungal activity and harbored genes required for lantibiotic and 2,3-butanediol production. In Arabidopsis, increased root hair number and fresh weight were obtained in the CH102-inocu…	Rejected	No MYC
MYC'+ 'gene expression'+ 'drought stress' + ' plants'+ 'PGPR'	Google scholar	Physiological and molecular changes in plants grown at low temperatures	Theocharis et al., 2012	Apart from water availability, low temperature is the most important environmental factor limiting the productivity and geographical distribution of plants across the world. To cope with cold stress, plant species have evolved several physiological and molecular adaptations to maximize cold tolerance by adjusting their metabolism. The regulation of some gene products represents an addi- tional me…	Rejected	Review
MYC'+ 'gene expression'+ 'drought stress' + ' plants'+ 'PGPR'	Google scholar	Gene networks underlying the early regulation of Paraburkholderia phytofirmans PsJN induced systemic resistance in Arabidopsis	Timmermann et al., 2019	Plant defense responses to biotic stresses are complex biological processes, all governed by sophisticated molecular regulations. Induced systemic resistance (ISR) is one of these defense mechanisms where beneficial bacteria or fungi prime plants to resist pathogens or pest attacks. In ISR, the defense arsenal in plants remains dormant and it is only triggered by an infection, allowing a better a…	Rejected	No MYC
MYC'+ 'gene expression'+ 'drought stress' + ' plants'+ 'PGPR'	Google scholar	Heavy Metal Stress, Signaling, and Tolerance Due to Plant-Associated Microbes: An Overview	Tiwari et al., 2018	Several anthropogenic activities including mining, modern agricultural practices, and industrialization have long-term detrimental effect on our environment. All these factors lead to increase in heavy metal concentration in soil, water, and air. Soil contamination with heavy metals cause several environmental problems and imparts toxic effect on plant as well as animals. In response to these adv…	Rejected	Review
MYC'+ 'gene expression'+ 'drought stress' + ' plants'+ 'PGPR'	Google scholar	Wheat Production in Changing Environments	Tounsi et al., 2019		Rejected	Book
MYC'+ 'gene expression'+ 'drought stress' + ' plants'+ 'PGPR'	Google scholar	Signaling in the Rhizosphere	Venturi et al., 2016	Signaling studies in the rhizosphere have focused on close interactions between plants and symbiotic microorganisms. However, this focus is likely to expand to other microorganisms because the rhizomicrobiome is important for plant health and is able to influence the structure of the microbial community. We discuss here the shaping of the rhizomicrobiome and define which aspects can be considered…	Rejected	Review
MYC'+ 'gene expression'+ 'drought stress' + ' plants'+ 'PGPR'	Google scholar	A Novel Gene SbSI-2 Encoding Nuclear Protein from a Halophyte Confers Abiotic Stress Tolerance in E. coli and Tobacco	Yadav et al., 2014	Salicornia brachiata is an extreme halophyte that grows luxuriantly in coastal marshes. Previously, we have reported isolation and characterization of ESTs from Salicornia with large number of novel/unknown salt-responsive gene sequences. In this study, we have selected a novel salt-inducible gene SbSI-2 (Salicornia brachiata salt-inducible-2) for functional characterization. Bioinformatics analy…	Rejected	No MYC
MYC'+ 'gene expression'+ 'drought stress' + ' plants'+ 'PGPR'	Google scholar	Induced Systemic Resistance for Improving Plant Immunity by Beneficial Microbes	Yu et al., 2022	Plant beneficial microorganisms improve the health and growth of the associated plants. Application of beneficial microbes triggers an enhanced resistance state, also termed as induced systemic resistance (ISR), in the host, against a broad range of pathogens. Upon the activation of ISR, plants employ long-distance systemic signaling to provide protection for distal tissue, inducing rapid and str…	Rejected	Review
MYC'+ 'gene expression'+ 'drought stress' + ' plants'+ 'PGPR'	Google scholar	Transcriptional profiling reveals changes in gene regulation and signaling transduction pathways during temperature stress in wucai (Brassica campestris L.)	Yuan et al., 2021	Background: Wucai (Brassica campestris L. ssp. chinensis var. rosularis Tsen) is a cold-tolerant plant that is vulnerable to high temperature. This study explored the response mechanism of wucai to low temperature. In this study, wucai seedlings were treated with different temperatures, including low temperature (LT), high temperature (HT), and a control. Results: According to transcriptomics ana…	Rejected	No MYC
MYC'+ 'gene expression'+ 'drought stress' + ' plants'+ 'PGPR'	Google scholar	Unraveling Root Developmental Programs Initiated by Beneficial Pseudomonas spp. Bacteria	Zamioudis et al., 2013	Plant roots are colonized by an immense number of microbes, referred to as the root microbiome. Selected strains of beneficial soil-borne bacteria can protect against abiotic stress and prime the plant immune system against a broad range of pathogens. Pseudomonas spp. rhizobacteria represent one of the most abundant genera of the root microbiome. Here, by employing a germ- free experimental syste…	Rejected	No MYC
MYC'+ 'gene expression'+ 'drought stress' + ' plants'+ 'PGPR'	Google scholar	N-3-oxo-hexanoyl-homoserine lactone, a bacterial quorum sensing signal, enhances salt tolerance in Arabidopsis and wheat	Zhao et al., 2020	Background: N‐acyl‐homoserine lactones (AHLs) are the quorum sensing (QS) signal molecules to coordinate the collective behavior in a population in Gram‐negative bacteria. Recent evidences demonstrate their roles in plant growth and defense responses. Results: In present study, we show that the treatment of plant roots with N‐3‐oxo‐hexanoyl‐homoserine lactone (3OC6‐HSL), one molecule of AHLs fami…	Rejected	No abiotic stress
MYC'+ 'gene expression'+ 'drought stress' + ' plants'+ 'PGPR'	Google scholar	Bacillus amyloliquefaciens SAY09 Increases Cadmium Resistance in Plants by Activation of Auxin-Mediated Signaling Pathways	Zhou et al., 2017	Without physical contact with plants, certain plant growth-promoting rhizobacteria (PGPR) can release volatile organic compounds (VOCs) to regulate nutrient acquisition and induce systemic immunity in plants. However, whether the PGPR-emitted VOCs can induce cadmium (Cd) tolerance of plants and the underlying mechanisms remain elusive. In this study, we probed the effects of Bacillus amyloliquefa…	Rejected	No MYC
MYC'+ 'gene expression'+ 'drought stress' + ' plants'+ 'PGPR'	Google scholar	Plant interactions with microbes and insects: from molecular mechanisms to ecology	Pieterse et al., 2007	Plants are members of complex communities and interact both with antagonists and beneficial organisms. An important question in plant defense-signaling research is how plants integrate signals induced by pathogens, beneficial microbes and insects into the most appropriate adaptive response. Molecular and genomic tools are now being used to uncover the com- plexity of the induced defense signaling…	Rejected	Review
MYC'+ 'gene expression'+ 'drought stress' + ' plants'+ 'PGPR'	Google scholar	Efficiency of microbial bio-agents as elicitors in plant defense mechanism under biotic stress: A review	Zehra et al., 2021	Numerous harmful microorganisms and insect pests have the ability to cause plant infections or damage, which is mostly controlled by toxic chemical agents. These chemical compounds and their derivatives exhibit hazardous effects on habitats and human life too. Hence, there’s a need to develop novel, more effective and safe bio-control agents. A variety of microbes such as viruses, bacteria, and f…	Rejected	Review
MYC'+ 'gene expression'+ 'drought stress' + ' plants'+ 'PGPR'	Google scholar	Sustainable Agriculture Reviews 51 Legume Agriculture and Biotechnology Vol 2	Furlan et al., 2021		Rejected	Book
MYC'+ 'gene expression'+ 'drought stress' + ' plants'+ 'PGPR'	Google scholar	Overview of Cold Stress Regulation in Plants	Manasa et al., 2022	Among different environmental stresses,cold stress can significantly affect plant’s physiological activity, biochemical metabolism, growth,development and crop produc- tivity. Problems due to cold stress should be addressed seriously keeping in concern extreme temperature events due to climate change, alarming increase in population growth and demanding food needs. Cold signal is recognized by re…	Rejected	Review
MYC'+ 'gene expression'+ 'drought stress' + ' plants'+ 'PGPR'	Google scholar	Induction of Salt Tolerance in Arabidopsis thaliana by Volatiles From Bacillus amyloliquefaciens FZB42 via the Jasmonic Acid Signaling Pathway	Liu et al., 2020	Previously, we showed that Bacillus amyloliquefaciens FZB42 can confer salt tolerance in plants by root inoculation under salt stress condition, and the FZB42 volatile organic compounds (VOCs) promoted plant growth and development under non-salt stress condition. In the present study, we investigated the mechanism that allows FZB42 VOCs to confer salt tolerance in Arabidopsis without colonization…	Rejected	No MYC
MYC'+ 'gene expression'+ 'drought stress' + ' plants'+ 'PGPR'	Google scholar	Jasmonates and Plant Salt Stress: Molecular Players, Physiological Effects, and Improving Tolerance by Using Genome-Associated Tools	Delgado et al., 2021	Soil salinity is one of the most limiting stresses for crop productivity and quality worldwide. In this sense, jasmonates (JAs) have emerged as phytohormones that play essential roles in mediating plant response to abiotic stresses, including salt stress. Here, we reviewed the mechanisms underlying the activation and response of the JA-biosynthesis and JA-signaling pathways under saline condition…	Rejected	Review
MYC'+ 'gene expression'+ 'drought stress' + ' plants'+ 'PGPR'	Google scholar	Carbon and Nitrogen Cycling in Soil	Pathan et al., 2020		Rejected	Book
MYC'+ 'gene expression'+ 'drought stress' + ' plants'+ 'PGPR'	Google scholar	Biofilm formation and regulation of salicylic acid-inducible genes expression in Arabidopsis by Algerian indigenous bacteria from wheat and potatoes rhizospheres in semi-arid Sétif region	Benslim et al., 2018	45 bacterial isolates from potatoes and wheat rhizospheres near Sétif (Algeria) pre-selected for their antagonistic activity against three fungal plant pathogens, two necrotrophic Fusarium solani var. coeruleum and Phytophtora infestans, and a systemic F. oxysporum f. sp. albedinis. Molecular typing of the isolates showed abundance of Bacillus compared to Pseu- domonas. Some of the tested strains…	Rejected	No MYC
MYC'+ 'gene expression'+ 'drought stress' + ' plants'+ 'PGPR'	Google scholar	Principles of Plant-Microbe Interactions	Spaepen et al., 2019		Rejected	Book
MYC'+ 'gene expression'+ 'drought stress' + ' plants'+ 'PGPR'	Google scholar	Principles of Plant-Microbe Interactions	Zhou et al., 2017	Without physical contact with plants, certain plant growth-promoting rhizobacteria (PGPR) can release volatile organic compounds (VOCs) to regulate nutrient acquisition and induce systemic immunity in plants. However, whether the PGPR-emitted VOCs can induce cadmium (Cd) tolerance of plants and the underlying mechanisms remain elusive. In this study, we probed the effects of Bacillus amyloliquefa…	Rejected	No MYC
MYC'+ 'gene expression'+ 'drought stress' + ' plants'+ 'PGPR'	Google scholar	Role of Jasmonates, Calcium, and Glutathione in Plants to Combat Abiotic Stresses Through Precise Signaling Cascade	Aslam et al., 2021	Plant growth regulators have an important role in various developmental processes during the life cycle of plants. They are involved in abiotic stress responses and tolerance. They have very well-developed capabilities to sense the changes in their external milieu and initiate an appropriate signaling cascade that leads to the activation of plant defense mechanisms. The plant defense system activ…	Rejected	Review
