# Supplementary material for: Meta-analysis of plant growth-promoting rhizobacteria interaction with host plants: implications for drought stress response gene expression
Source: Front Plant Sci. 2024 Jan 15;14:1282553. doi: 10.3389/fpls.2023.1282553 (PMC10823023; doi:10.3389/fpls.2023.1282553)
Supplement: Supplementary file 21 [file Table_6.xlsx]

## Sheet: ACC-deaminasi
Key words	Source	Title	Author	Abstract	Accepted/rejected	Reason
ACC-deaminase' + ' gene expression' + 'drought stress' + 'plants' +'PGPR'	Google Scholar	Bio-prospecting of ACC deaminase producing Rhizobacteria towards sustainable agriculture: A special emphasis on abiotic stress in plants	Murali et al., 2021	In agriculture, eco-friendly management practices worldwide are required to enhance food security under the changing agro-climatic environmental conditions with avoiding the use of harmful chemicals. Plant growth promoting rhizobacteria (PGPR) is a group of soil microbes closely associated with roots and capable of improving plant growth. 1-Aminocyclopropane-1-carboxylic acid (ACC) deaminase prod…	Rejected	Review
ACC-deaminase' + ' gene expression' + 'drought stress' + 'plants' +'PGPR'	Google Scholar	Unravelling the biochemistry and genetics of ACC deaminase-An enzyme alleviating the biotic and abiotic stress in plants	Gupta et al., 2019	The enzyme 1-aminocyclopropane-1-carboxylate (ACC) deaminase is known for alleviating the adverse effects of ethylene generated in response various stressors. Phylogenetic analysis of corresponding gene encoding ACC degrading enzyme (acds) reveals their occurrence in diverse group of bacteria and fungi. The transcription of acds gene is tightly regulated and expresses differentially under differe…	Rejected	Review
ACC-deaminase' + ' gene expression' + 'drought stress' + 'plants' +'PGPR'	Google Scholar	Plant Growth Promoting Rhizobacteria for Agricultural Sustainability	Kumar et al., 2019		Rejected	Book
ACC-deaminase' + ' gene expression' + 'drought stress' + 'plants' +'PGPR'	Google Scholar	Promotion of plant growth by ACC deaminase-producing soil bacteria	Glick et al., 2007	Plant growth-promoting bacteria that con- tain the enzyme 1-aminocyclopropane-1-carboxylate (ACC) deaminase facilitate plant growth and development by decreasing plant ethylene levels, especially following a variety of environmental stresses. In this review, the physiological basis for this growth-promotion effect is examined in some detail. In addition, models are presented that endeav- our to e…	Rejected	Review
ACC-deaminase' + ' gene expression' + 'drought stress' + 'plants' +'PGPR'	Google Scholar	Biochemistry and genetics of ACC deaminase: a weapon to “stress ethylene” produced in plants	Singh et al., 2015	1-aminocyclopropane-1-carboxylate deaminase (ACCD), a pyridoxal phosphate-dependent enzyme, is widespread in diverse bacterial and fungal species. Owing to ACCD activity, certain plant associated bacteria help plant to grow under biotic and abiotic stresses by decreasing the level of “stress ethylene” which is inhibitory to plant growth. ACCD breaks down ACC, an immediate precursor of ethylene, t…	Rejected	Review
ACC-deaminase' + ' gene expression' + 'drought stress' + 'plants' +'PGPR'	Google Scholar	Recent developments in use of 1-aminocyclopropane-1- carboxylate (ACC) deaminase for conferring tolerance to biotic and abiotic stress	Gontia-Mishra, 2014	Ethylene is an essential plant hormone also known as a stress hormone because its synthesis is accelerated by induction of a variety of biotic and abiotic stress. The plant growth promoting bacteria containing the enzyme 1-aminocyclopropane-1-carboxylate (ACC) deaminase enhances plant growth by decreasing plant ethylene levels under stress condi- tions. The expression of ACC deaminase (acdS) gene…	Rejected	Review
ACC-deaminase' + ' gene expression' + 'drought stress' + 'plants' +'PGPR'	Google Scholar	Enhancement of growth and salt tolerance of rice seedlings (Oryza sativa L.) by regulating ethylene production with a novel halotolerant PGPR strain Glutamicibacter sp. YD01 containing ACC deaminase activity	Ji et al., 2020	Plant growth-promoting rhizobacteria can stimulate not only plant growth and development, but also alleviate the negative effects on plants caused by abiotic stresses. In this study, a novel halotolerant strain was isolated and identified as Glutamici- bacter sp. (YD01) using 16S rDNA analysis. This strain tolerated up to 10% NaCl and showed two growth-promoting traits such as 1-aminocyclopropane…	Rejected	Proteomic study
ACC-deaminase' + ' gene expression' + 'drought stress' + 'plants' +'PGPR'	Google Scholar	Perspective of plant growth promoting rhizobacteria (PGPR) containing ACC deaminase in stress agriculture	Saleem et al., 2007	Ethylene is a gaseous plant growth hormone produced endogenously by almost all plants. It is also pro- duced in soil through a variety of biotic and abiotic mecha- nisms, and plays a key role in inducing multifarious physiological changes in plants at molecular level. Apart from being a plant growth regulator, ethylene has also been established as a stress hormone. Under stress conditions like th…	Rejected	Review
ACC-deaminase' + ' gene expression' + 'drought stress' + 'plants' +'PGPR'	Google Scholar	A fruitful decade of bacterial ACC deaminase biotechnology: a pragmatic approach towards abiotic stress relief in plants	Moon-Ali, 2022	Global food security can be achieved through rigorous agricultural security because agriculture is the basis of food. Several reports have shown that environmental stresses greatly affect agriculture productivity around the globe. Abiotic stressors cause the stimulation of ethylene biosynthesis in plants, which is a crucial mediator of environmental stresses in plants. Thus, the mitigation of abi…	Rejected	Review
ACC-deaminase' + ' gene expression' + 'drought stress' + 'plants' +'PGPR'	Google Scholar	Effects of Bacterial ACC Deaminase on Brassica napus Gene Expression	Stearns et al., 2012	Plants in association with plant growth-promoting rhizobacteria can benefit from lower plant ethylene levels through the action of the bacterial enzyme 1-aminocyclopropane-1- carboxylic acid (ACC) deaminase. This enzyme cleaves the immediate biosynthetic precursor of ethylene, ACC. Ethylene is responsible for many aspects of plant growth and development but, under stressful conditions, it exacerb…	Accepted
ACC-deaminase' + ' gene expression' + 'drought stress' + 'plants' +'PGPR'	Google Scholar	Changes in Gene Expression in Canola Roots Induced by ACC-Deaminase-Containing Plant-Growth-Promoting Bacteria	Hontzeas et al., 2003	The technique of RNA arbitrarily primed-polymerase chain reaction (RAP-PCR) was used to study changes in gene expression over time in canola roots treated with the 1-aminocyclopropane-1-carboxylate (ACC) deaminase-containing plant-growth-promoting bacterium Enterobacter cloacae UW4 and to compare the changes with those in a mutant of E. cloacae UW4 in which the ACC deaminase structural gene acdS …	Rejected	No abiotic stress
ACC-deaminase' + ' gene expression' + 'drought stress' + 'plants' +'PGPR'	Google Scholar	Plant-Microbe Interaction: An Approach to Sustainable Agriculture	Choudhary et al.,2017		Rejected	Book
ACC-deaminase' + ' gene expression' + 'drought stress' + 'plants' +'PGPR'	Google Scholar	Promotion of Plant Growth by Bacterial ACC Deaminase	Glick et al., 2007	To date, there has been only limited commercial use of plant growth-promoting bacteria in agriculture, horticulture, and silviculture. However, with recent progress toward understanding the mechanisms that these organisms utilize to facilitate plant growth, the use of plant growth-promoting bacteria is expected to continue to increase worldwide. One of the key mechanisms employed by plant growth-…	Rejected	Review
ACC-deaminase' + ' gene expression' + 'drought stress' + 'plants' +'PGPR'	Google Scholar	Alleviation of drought stress in pulse crops with ACC deaminase producing rhizobacteria isolated from acidic soil of Northeast India	Saikia et al., 2018	The agricultural crops are often affected by the scarcity of fresh water. Seasonal drought is a major constraint on Northeast Indian agriculture. Almost 80% of the agricultural land in this region is acidic and facing severe drought during the winter period. Apart from classical breeding and transgenic approaches, the application of plant-growth-promoting bacteria (PGPB) is an alternative strateg…	Accepted
ACC-deaminase' + ' gene expression' + 'drought stress' + 'plants' +'PGPR'	Google Scholar	Southern blight disease of tomato control by 1-aminocyclopropane-1-carboxylate (ACC) deaminase producing Paenibacillus lentimorbus B-30488	Dixit et al., 2016	Tomato cultivation is highly susceptible for soil born diseases and among them southern blight disease caused by Scelerotium rolfsii is very common. For its management use of chemical fungicides is not very successful as their spores are able to survive for many years in the soil. As an alternative eco-friendly approach to control the disease antagonistic microbes are being characterized.Among th…	Rejected	Biotic stress
ACC-deaminase' + ' gene expression' + 'drought stress' + 'plants' +'PGPR'	Google Scholar	Effect of transferring 1-aminocyclopropane-1- carboxylic acid (ACC) deaminase genes into Pseudomonas fluorescens strain CHA0 and its gacA derivative CHA96 on their growth-promoting and disease-suppressive capacities	Wang et al., 2000	Pseudomonas fluorescens strain CHA0, a root colonizing bacterium, has a broad spectrum of biocontrol activity against plant diseases. However, strain CHA0 is unable to utilize 1-aminocyclopropane-1-carboxylic acid (ACC), the immediate precursor of plant ethylene, as a sole source of nitrogen. This suggests that CHA0 does not contain the enzyme ACC deaminase, which cleaves ACC to ammonia and α-ket…	Rejected	No drought stress
ACC-deaminase' + ' gene expression' + 'drought stress' + 'plants' +'PGPR'	Google Scholar	The ACC deaminase-producing plant growth-promoting bacteria: Influences of bacterial strains and ACC deaminase activities in plant tolerance to abiotic stress	Naing et al.,2021	Global climate change results in frequent occurrences and/or long durations of abiotic stress. Field grown plants are affected by abiotic stress, and they modulate ethylene in response to abiotic stress exposure and use it as a signaling molecule in stress tolerance mechanisms. However, frequent occurrences and/or long durations of stress conditions can cause plants to induce ethylene levels high…	Rejected	Review
ACC-deaminase' + ' gene expression' + 'drought stress' + 'plants' +'PGPR'	Google Scholar	Isolation and characterization of ACC deaminase genes from two different plant growth-promoting rhizobacteria	Shah, et al., 1998	We have recently proposed that one way that plant growth-promoting rhizobacteria (PGPR) stimulate plant growth is through the activity of the enzyme 1-aminocyclopropane-1-carboxylate (ACC) deaminase, which causes a lowering of plant ethylene levels resulting in longer roots. As part of an effort to understand the role of this enzyme in PGPR, the genes for ACC deaminase from two PGPR, Enterobacter…	Rejected	No abiotic stress
ACC-deaminase' + ' gene expression' + 'drought stress' + 'plants' +'PGPR'	Google Scholar	Amelioration of Salinity Stress by PGPR: ACC Deaminase and ROS Scavenging Enzymes Activity	Bharti et al., 2019		Rejected	Book
ACC-deaminase' + ' gene expression' + 'drought stress' + 'plants' +'PGPR'	Google Scholar	Modulation of plant ethylene levels by the bacterial enzyme ACC deaminase	Glick et al., 2005	Soil microorganisms that produce the enzyme 1-aminocyclopropane-1-carboxylate (ACC) deaminase promote plant growth by sequestering and cleaving plant-produced ACC, and thereby lowering the level of ethylene in the plant. Decreased ethylene levels allows the plant to be more resistant to a wide variety of environmental stresses. Here, the biochemistry of ACC deaminase; the environmental distributi…	Rejected	Review
ACC-deaminase' + ' gene expression' + 'drought stress' + 'plants' +'PGPR'	Google Scholar	Enhancement of growth and salt tolerance of rice seedlings (Oryza sativa L.) by regulating ethylene production with a novel halotolerant PGPR strain Glutamicibacter sp. YD01 containing ACC deaminase activity	Ji et al.,2020		Rejected	Duplicate
ACC-deaminase' + ' gene expression' + 'drought stress' + 'plants' +'PGPR'	Google Scholar	Induction of drought tolerance in tomato upon the application of ACC deaminase producing plant growth promoting rhizobacterium Bacillus subtilis Rhizo SF 48	Gowtham et al., 2020	A total of ten 1-aminocyclopropane-1-carboxylate (ACC) deaminase producing PGPR isolates were selected and evaluated for the induction of drought stress tolerance in tomato. Among the selected PGPR, maximum seed (laboratory) and plant growth promotion (greenhouse) was observed in tomato seeds bacterized with Bacillus subtilis Rhizo SF 48. The genomic study confirmed the presence of ACC deaminase …	Accepted
ACC-deaminase' + ' gene expression' + 'drought stress' + 'plants' +'PGPR'	Google Scholar	The ACC deaminase expressing endophyte Pseudomonas spp. Enhances NaCl stress tolerance by reducing stress-related ethylene production, resulting in improved growth, photosynthetic performance, and ionic balance in tomato plants	Win et al., 2018	Plant growth promoting bacteria (PGPB) endophytes that express 1-aminocyclopropane-1-carboxylate (ACC) deaminase reportedly confer plant tolerance to abiotic stresses such as salinity by lowering stress-related ethylene levels. Two preselected ACC deaminase expressing endophytic Pseudomonas spp. strains, OFT2 and OFT5, were compared in terms of their potential to promote plant growth, leaf water …	Rejected	Proteomic study
ACC-deaminase' + ' gene expression' + 'drought stress' + 'plants' +'PGPR'	Google Scholar	Microbes: The Foundation Stone of the Biosphere	Hurst, 2021		Rejected	Book
ACC-deaminase' + ' gene expression' + 'drought stress' + 'plants' +'PGPR'	Google Scholar	Plant–rhizobacteria interactions alleviate abiotic stress condition	Dimpka et al., 2009	Root-colonizing non-pathogenic bacteria can increase plant resistance to biotic and abiotic stress factors. Bacterial inoculates have been applied as biofertilizers and can increase the effectiveness of phytoremediation. Inoculating plants with non-pathogenic bacteria can provide ‘bioprotec- tion’ against biotic stresses, and some root-colonizing bacteria increase tolerance against abiotic stress…	Rejected	Review
ACC-deaminase' + ' gene expression' + 'drought stress' + 'plants' +'PGPR'	Google Scholar	Induction of drought tolerance in Pennisetum glaucum by ACC deaminase producing PGPR- Bacillus amyloliquefaciens through Antioxidant defense system	Murali et al., 2021	Rhizobacteria from pearl millet were screened to produce 1-aminocyclopropane-1-carboxylate (ACC) deaminase and to evaluate its role in alleviating drought stress. Amongst 96 isolates, 28 were positive for ACC deaminase production, with MMR04 offering maximum activity of 2196.23 nmol of α-ketobutyrate produced mg–1 of protein h–1. The ACC deaminase producing rhizobacteria with multiple beneficial …	Accepted
ACC-deaminase' + ' gene expression' + 'drought stress' + 'plants' +'PGPR'	Google Scholar	Effect of transferring 1-aminocyclopropane-1- carboxylic acid (ACC) deaminase genes into Pseudomonas fluorescens strain CHA0 and its gacA derivative CHA96 on their growth-promoting and disease-suppressive capacities	Wang et al., 2000		Rejected	Duplicate
ACC-deaminase' + ' gene expression' + 'drought stress' + 'plants' +'PGPR'	Google Scholar	Levels of ACC and related compounds in exudate and extracts of canola seeds treated with ACC deaminase-containing plant growth-promoting bacteria	Penrose et al., 2001	It was previously proposed that plant growth-promoting bacteria that possess 1-aminocyclopropane-1- carboxylic acid (ACC) deaminase could utilize ACC that is present in the exudate of germinating canola seeds. The uptake and cleavage of ACC by these bacteria would lower the level of ACC, and thus ethylene within the plant, and reduce the extent of its inhibition on root elongation. To test part o…	Rejected	Proteomic study
ACC-deaminase' + ' gene expression' + 'drought stress' + 'plants' +'PGPR'	Google Scholar	Bacteria with ACC deaminase can promote plant growth and help to feed the world	Glick et al., 2014	To feed all of the world’s people, it is necessary to sustainably increase agricultural productivity. One way to do this is through the increased use of plant growth-promoting bacteria; recently, scientists have developed a more profound understanding of the mechanisms employed by these bacteria to facil- itate plant growth. Here, it is argued that the ability of plant growth-promoting bacteria t…	Rejected	Review
ACC-deaminase' + ' gene expression' + 'drought stress' + 'plants' +'PGPR'	Google Scholar	Flooding tolerance of transgenic tomato plants expressing the bacterial enzyme ACC deaminase controlled by the 35S, rolD or PRB-1b promoter	Grichko et al., 2001	Transgenic tomato plants Lycopersicon esculentum (Solanaceae) cv. Heinz 902 expressing the bacterial gene 1-aminocyclopropane-1-carboxylic acid (ACC) deaminase, under the transcriptional control of either two tandem 35S cauliflower mosaic virus promoters (constitutive expression), the rolD promoter from Agrobacterium rhizogenes (root specific expression) or the pathogenesis related PRB-1b promote…	Rejected	No drought stress
ACC-deaminase' + ' gene expression' + 'drought stress' + 'plants' +'PGPR'	Google Scholar	Induction of tolerance to salinity in wheat genotypes by plant growth promoting endophytes: Involvement of ACC deaminase and antioxidant enzymes	Afridi et al., 2019	Plant growth-promoting endophytes (PGPEs) can colonize the internal tissues of plants and are capable of promoting plant growth. These bacteria can improve plant tolerance against various biotic and abiotic stresses via the expression of antioxidant enzymes and the production of 1-aminocyclopropane-1-carboxylate (ACC) deaminase. Two salt-tolerant PGPEs, Kocuria rhizophila: KF875448 (14ASP) and Cr…	Rejected	PGPE
ACC-deaminase' + ' gene expression' + 'drought stress' + 'plants' +'PGPR'	Google Scholar	The Role of ACC Deaminase Producing PGPR in Sustainable Agriculture	Saraf et al., 2010	The plant rhizosphere is a multidimensional and dynamic ecological environment of complicated microbe–plant interactions for harnessing essential macro and micronutrients from a limited nutrient pool. Certain plant growth promoting rhizobacteria (PGPR) contain a vital enzyme, 1-aminocyclopropane- 1-carboxylic acid (ACC) deaminase (EC 4.1.99.4), which regulates ethylene production by metabolizing …	Rejected	Book
ACC-deaminase' + ' gene expression' + 'drought stress' + 'plants' +'PGPR'	Google Scholar	Effects of ACC deaminase containing rhizobacteria on plant growth and expression of Toc GTPases in tomato (Solanum lycopersicum) under salt stress	Yan et al., 2014	The bacterial enzyme 1-aminocyclopropane-1-carboxylate (ACC) deaminase plays a key role in lowering plant stress ethylene levels, thereby stimulating plant growth. The present study aims to evaluate whether the ACC deaminase producing plant growth promoting rhizobacterium (PGPR) Pseudomonas putida UW4 can maintain and promote plant growth in saline environments and modulate the expression of chlo…	Rejected	Proteomic study
ACC-deaminase' + ' gene expression' + 'drought stress' + 'plants' +'PGPR'	Google Scholar	Plant Growth Promotion Under Water: Decrease of Waterlogging-Induced ACC and Ethylene Levels by ACC Deaminase-Producing Bacteria	Ali et al., 2018	Some plant growth-promoting bacteria encode for 1-aminocyclopropane-1-carboxylate (ACC) deaminase, which facilitates plant growth and development by lowering the level of stress ethylene under waterlogged conditions. The substrate ACC is the immediate precursor for ethylene synthesis in plants; while bacterial ACC deaminase hydrolyzes this compound into α-ketobutyrate and ammonia to mitigate the …	Rejected	Review
ACC-deaminase' + ' gene expression' + 'drought stress' + 'plants' +'PGPR'	Google Scholar	Plant Growth-Promoting Rhizobacteria Enhance Abiotic Stress Tolerance in Solanum tuberosum Through Inducing Changes in the Expression of ROS-Scavenging Enzymes and Improved Photosynthetic Performance	Gururani et al., 2013	In this report we address the changes in the expression of the genes involved in ROS scavenging and ethylene biosynthesis induced by the inoculation of plant growth-promoting rhizobacteria (PGPR) isolated from potato rhizosphere. The two Bacillus isolates used in this investigation had earlier demonstrated a striking influence on potato tuberization. These isolates showed enhanced 1-aminocyclopro…	Rejected	Proteomic study
ACC-deaminase' + ' gene expression' + 'drought stress' + 'plants' +'PGPR'	Google Scholar	ACC deaminase containing endophytic bacteria ameliorate salt stress in Pisum sativum through reduced oxidative damage and induction of antioxidative defense systems	Sofy et al.,2021	Approximately 6% of the world’s total land area and 20% of the irrigated land are affected by salt stress. Egypt is one such country affected by salt-stress problems. This paper focuses on the role of isolated bacteria, such as Bacillus subtilis and Pseudomonas fluorescens, in alleviating the harmful effects of salt stress. The results show that the irrigation of plants with different concentrati…	Rejected	Proteomic study
ACC-deaminase' + ' gene expression' + 'drought stress' + 'plants' +'PGPR'	Google Scholar	Amelioration of flooding stress by ACC deaminase-containing plant growth-promoting bacteria	Grichko et al., 2001	Seeds of wild-type tomato plants Lycopersicon esculentum (Solanaceae) cv. Heinz 902 were inoculated either with Enterobacter cloacae UW4, E. cloacae CAL2, Pseudomonas putida ATCC17399/pRKACC or P. putida ATCC17399/pRK415, the first three of these bacterial strains carrying and expressing the gene for 1-aminocyclopropane-1-carboxylic acid (ACC) deaminase. When they were 55 d old, tomato plants wer…	Rejected	Proteomic study
ACC-deaminase' + ' gene expression' + 'drought stress' + 'plants' +'PGPR'	Google Scholar	1‐Aminocyclopropane-1-carboxylate (ACC) Deaminase Gene in Pseudomonas azotoformans Is Associated with the Amelioration of Salinity Stress in Tomato	Liu et al., 2021	Although bacteria with 1-aminocyclopropane-1-carboxylate (ACC) deaminase activity have been used to mitigate biotic and abiotic stresses in crops, it is not well known whether the ACC deaminase gene (acdS) in Pseudomonas azotoformans is related to the alleviation of salt stress by the bacterium. This study aimed to evaluate the effects of acdS in P. azotoformans strain CHB 1107 on the nutrient up…	Rejected	No drought stress
ACC-deaminase' + ' gene expression' + 'drought stress' + 'plants' +'PGPR'	Google Scholar	Plant growth-promoting rhizobacteria enhance wheat salt and drought stress tolerance by altering endogenous phytohormone levels and TaCTR1/TaDREB2 expression	Barnawal et., 2017	Abiotic stresses such as salt and drought represent adverse environmental conditions that significantly damage plant growth and agricultural produc- tivity. In this study, the mechanism of the plant growth-promoting rhizo- bacteria (PGPR)-stimulated tolerance against abiotic stresses has been explored. Results suggest that PGPR strains, Arthrobacter protophormiae (SA3) and Dietzia natronolimnaea …	Rejected	Proteomic study
ACC-deaminase' + ' gene expression' + 'drought stress' + 'plants' +'PGPR'	Google Scholar	Achromobacter sp. FB-14 harboring ACC deaminase activity augmented rice growth by upregulating the expression of stress-responsive CIPK genes under salinity stress	Shahid et al., 2020	Soil salinity is one of the major plant growth and yield-limiting constraints in arid and semi-arid regions of the world. In addition to the oxidative damage, increasing salt stress is associated with elevated cellular ethylene levels due to the synthesis of 1-aminocyclopropane-1-carboxylic acid (ACC) in large amounts. The objective of the current study was to elucidate the inoculation effect of …	Rejected	Proteomic study
ACC-deaminase' + ' gene expression' + 'drought stress' + 'plants' +'PGPR'	Google Scholar	Effects of 1-aminocyclopropane-1-carboxylate (ACC) deaminase-overproducing Sinorhizobium meliloti on plant growth and copper tolerance of Medicago lupulina	Kong et al.,2015	Background and aims Rhizobia typically produce a lower level of ACC deaminase compared with free- living plant growth-promoting bacteria. While the endogenous rhizobial ACC deaminase is important in legume nodulation, it is not sufficient to protect host plants against environmental stresses. The main goal of this study was to assess the effects of a genetically engineered Sinorhizobium meliloti …	Rejected	No drought stress
ACC-deaminase' + ' gene expression' + 'drought stress' + 'plants' +'PGPR'	Google Scholar	Regulation of Expression of the prb-1b I ACC Deaminase Gene by UV-8 in Transgenic Tomatoes	Tamot et al., 2003	Transgenic tomato plants with 1-aminocyclopropane-1-carboxylic acid (ACC) deaminase gene from Enterobacter cloacae UW4 under the control of a pathogenesis-related promoter (prb-1b) from tobacco were challenged by abiotic stresses to determine the expression patterns ofthe transgene. No ACC deaminase RNA or protein was detected by RT-PCR and in western blots prepared from leaf proteins of transgen…	Rejected	No acdS expression
ACC-deaminase' + ' gene expression' + 'drought stress' + 'plants' +'PGPR'	Google Scholar	ACC deaminase producing plant growth promoting rhizobacteria enhance salinity stress tolerance in Pisum sativum	Gupta et al., 2021	Salinity stress is one of the most serious environmental stresses which limit plant growth, development and productivity. In this study, we screened 25 bacterial isolates based on the biochemical activity of ACC deaminase. Two potent PGPR namely Bacillus marisflavi (CHR JH 203) and Bacillus cereus (BST YS1_42) having the highest ACC deaminase (ACCD) activity were selected for further analyses suc…	Rejected	No drought stress
ACC-deaminase' + ' gene expression' + 'drought stress' + 'plants' +'PGPR'	Google Scholar	Transposon mutagenesis of ACC deamination gene alters the proteomic analysis of wheat plant under non‐saline and saline stress	Singh et al.,2022	The development of high-throughput techniques with evolving bioinformatics tools has elucidated the adaptation mechanism of plant to certain environmental stress like salinity. The characterization of proteins is critical for plant stress responses and it provides the comprehensive information about the cellular and biochemical pathway involved in various stress mitiga- tion. In the present work,…	Rejected	No drought stress
ACC-deaminase' + ' gene expression' + 'drought stress' + 'plants' +'PGPR'	Google Scholar	Characterization of ACC deaminase from the biocontrol and plant growth-promoting agent Trichoderma asperellum T203	Viterbo et al., 2010	1-Aminocyclopropane-1-carboxylate (ACC) deaminase activity was evaluated in the biocontrol and plant growth-promoting fungus Trichoderma asperellum T203. Fungal cultures grown with ACC as the sole nitrogen source showed high enzymatic activity. The enzyme encoding gene (Tas-acdS) was isolated, and an average 3.5-fold induction of the gene by 3 mM ACC was detected by real-time PCR. Escherichia col…	Rejected	No abiotic stress
ACC-deaminase' + ' gene expression' + 'drought stress' + 'plants' +'PGPR'	Google Scholar	Enhanced chickpea growth-promotion ability of a Mesorhizobium strain expressing an exogenous ACC deaminase gene	Nascimento et al.,2011	Aims The main goal of the study reported herein was to assess the nodulation performance of a Mesorhizobium strain transformed with an exogenous ACC deaminase gene (acdS), and its subsequent ability to increase chickpea plant growth under normal and waterlogged conditions. Methods The Mesorhizobium ciceri strain LMS-1 was transformed with the acdS gene of Pseudomonas putida UW4 by triparental con…	Rejected	No acdS expression
ACC-deaminase' + ' gene expression' + 'drought stress' + 'plants' +'PGPR'	Google Scholar	Plant growth-promoting bacteria Bacillus amyloliquefaciens NBRISN13 modulates gene expression profile of leaf and rhizosphere community in rice during salt stress	Nautiyal et al., 2013	Growth and productivity of rice and soil inhabiting microbial population is negatively affected by soil salinity. However, some salt resistant, rhizosphere competent bacteria improve plant health in saline stress. Present study evaluated the effect of salt tolerant Bacillus amyloliquefaciens NBRISN13 (SN13) inoculation on rice plants in hydroponic and soil conditions exposed to salinity. SN13 inc…	Rejected	Proteomic study
ACC-deaminase' + ' gene expression' + 'drought stress' + 'plants' +'PGPR'	Google Scholar	Mitigation of salt stress in wheat plant (Triticum aestivum) by ACC deaminase bacterium Enterobacter sp. SBP-6 isolated from Sorghum bicolor	Singh et al.,2016	The plant growth promoting bacteria can ameliorate the abiotic stressors through induced systemic tolerance in associated plants. The present work reports the efficiency of a plant growth promoting rhizobacterium (PGPR) Enterobacter sp. SBP-6 containing ACCD activity to stimulate the growth of the wheat plant under salinity stress conditions. Besides ACCD activity, the isolate was able to show ot…	Rejected	No acdS expression
ACC-deaminase' + ' gene expression' + 'drought stress' + 'plants' +'PGPR'	Google Scholar	ACC deaminase from Pseudomonas fluorescens mediated saline resistance in groundnut (Arachis hypogea) plants	Saravanakumar et al.,2006	Aim: To study the effect of 1-aminocyclopropane-1-carboxylic acid (ACC) de- aminase from Pseudomonas fluorescens against saline stress under in vitro and field conditions in groundnut (Arachis hypogea) plants. Methods and Results: Four plant growth-promoting rhizobacteria (PGPR) strains were used in this study to evaluate their efficacy in groundnut plants against saline stress under in vitro. Am…	Rejected	No drought stress
ACC-deaminase' + ' gene expression' + 'drought stress' + 'plants' +'PGPR'	Google Scholar	Alleviation of salinity stress in wheat by ACC deaminase-producing Bacillus aryabhattai EWR29 with multifarious plant growth-promoting attributes	Farahat et al., 2020	Salinity is one of the most crucial stressors that restrain crop productivity. Endophytes with 1-aminocyclopropane-1-carboxylic acid (ACC) deaminase activity possess the potential to ameliorate salt stress in plants by degrading the precursor molecule of ethylene, ACC, whose concentration is elevated in salt-stressed plants. The present investigation reports the efficiency of salt-tolerant endoph…	Rejected	No drought stress
ACC-deaminase' + ' gene expression' + 'drought stress' + 'plants' +'PGPR'	Google Scholar	Manipulation of Ethylene Synthesis in Roots Through Bacterial ACC Deaminase for Improving Nodulation in Legumes	Shaharoona et al., 2011	Symbiotic association between rhizobia and legumes results in the development of unique structures on roots, called nodules. Nodulation is a very complex process involving a variety of genes that control NOD factors (bacterial signaling molecules), which are essential for the establishment, maintenance and regulation of this process and development of root nodules. Ethylene is an established pote…	Rejected	Review
ACC-deaminase' + ' gene expression' + 'drought stress' + 'plants' +'PGPR'	Google Scholar	Gene expression patterns in shoots of Camelina sativa with enhanced salinity tolerance provided by plant growth promoting bacteria producing 1‐aminocycloprop ane‐1‐carboxylate deaminase or expression of the corresponding acdS gene	Heydarian et al., 2021	Growth of plants in soil inoculated with plant growth promoting bacteria (PGPB) producing 1‐aminocyclopropane‐1‐carboxylate (ACC) deaminase or expression of the corresponding acdS gene in transgenic lines reduces the decline in shoot length, shoot weight and photosynthetic capacity triggered by salt stress in Camelina sativa. Reducing the levels of ethylene attenuated the salt stress response as …	Accepted
ACC-deaminase' + ' gene expression' + 'drought stress' + 'plants' +'PGPR'	Google Scholar	Characterization of 1-Aminocyclopropane-1-Carboxylate (ACC) Deaminase-Containing Pseudomonas spp. in the Rhizosphere of Salt-Stressed Canola	Akhgar et al., 2014	When exposed to biotic or abiotic stress conditions, plants produce ethylene from its immediate precursor 1-aminocyclopropane-1- carboxylate (ACC), leading to retarded root growth and senescence. Many plant growth-promoting rhizobacteria contain the enzyme ACC deaminase and this enzyme can cleave ACC to form α-ketobutyrate and ammonium, thereby lowering levels of ethylene. The aim of this study w…	Rejected	No acdS expression
ACC-deaminase' + ' gene expression' + 'drought stress' + 'plants' +'PGPR'	Google Scholar	ACC-Deaminase-Producing Endophyte Brachybacterium paraconglomeratum Strain SMR20 Ameliorates Chlorophytum Salinity Stress via Altering Phytohormone Generation	Barnawal et al., 2016	The higher content of salt in soil is the key constraint to crop productivity. Induction of stress ethylene production from 1-aminocyclopropane-1-carboxylate (ACC) in the plant system is one of the consequences of salt stress responsible for toxicity to the plant. Several transgenic plants have been developed by expressing the ACC deaminase bacterial gene as a stress management strategy which apa…	Rejected	No acdS expression
ACC-deaminase' + ' gene expression' + 'drought stress' + 'plants' +'PGPR'	Google Scholar	Indole-3-acetic-acid and ACC deaminase producing Leclercia adecarboxylata MO1 improves Solanum lycopersicum L. growth and salinity stress tolerance by endogenous secondary metabolites regulation	Kang et al., 2019	Background: The utilization of plant growth-promoting microbes is an environment friendly strategy to counteract stressful condition and encourage plants tolerance. In this regards, the current study was designed to isolate ACC deaminase and indole-3-acetic acid (IAA) producing halotolerant bacteria to promote tomato (Solanum lycopersicum L.) growth and tolerance against salinity stress. Results:…	Rejected	No drought stress
ACC-deaminase' + ' gene expression' + 'drought stress' + 'plants' +'PGPR'	Google Scholar	Trichoderma-Plant Root Colonization: Escaping Early Plant Defense Responses and Activation of the Antioxidant Machinery for Saline Stress Tolerance	Brotman et al., 2013	Trichoderma spp. are versatile opportunistic plant symbionts which can colonize the apoplast of plant roots. Microarrays analysis of Arabidopsis thaliana roots inoculated with Trichoderma asperelloides T203, coupled with qPCR analysis of 137 stress responsive genes and transcription factors, revealed wide gene transcript reprogramming, proceeded by a transient repression of the plant immune respo…	Rejected	Trichoderma
ACC-deaminase' + ' gene expression' + 'drought stress' + 'plants' +'PGPR'	Google Scholar	New Insights into 1-Aminocyclopropane-1-Carboxylate (ACC) Deaminase Phylogeny, Evolution and Ecological Significance	Nascimento et al., 2014	The main objective of this work is the study of the phylogeny, evolution and ecological importance of the enzyme 1- aminocyclopropane-1-carboxylate (ACC) deaminase, the activity of which represents one of the most important and studied mechanisms used by plant growth–promoting microorganisms. The ACC deaminase gene and its regulatory elements presence in completely sequenced organisms was verifie…	Rejected	Phylogenesis study
ACC-deaminase' + ' gene expression' + 'drought stress' + 'plants' +'PGPR'	Google Scholar	Mesorhizobium ciceri LMS-1 expressing an exogenous 1-aminocyclopropane-1-carboxylate (ACC) deaminase increases its nodulation abilities and chickpea plant resistance to soil constraints	Nascimento et al., 2012	Aims: Our goal was to understand the symbiotic behaviour of a Mesorhizobium strain expressing an exogenous 1-aminocyclopropane-1-carboxylate (ACC) deaminase, which was used as an inoculant of chickpea (Cicer arietinum) plants growing in soil. Methods and Results: Mesorhizobium ciceri LMS-1 (pRKACC) was tested for its plant growth promotion abilities on two chickpea cultivars (ELMO and CHK3226) gr…	Rejected	No abiotic stress
ACC-deaminase' + ' gene expression' + 'drought stress' + 'plants' +'PGPR'	Google Scholar	Isolation of ACC deaminase producing PGPR from rice rhizosphere and evaluating their plant growth promoting activity under salt stress	Bal et al.,2013	Aims Bacteria possessing ACC deaminase activity re- duce the level of stress ethylene conferring resistance and stimulating growth of plants under various biotic and abiotic stresses. The present study aims at isolating efficient ACC deaminase producing PGPR strains from the rhizosphere of rice plants grown in coastal saline soils and quantifying the effect of potent PGPR isolates on rice seed ge…	Rejected	Proteomic study
ACC-deaminase' + ' gene expression' + 'drought stress' + 'plants' +'PGPR'	Google Scholar	Heterologous expression of ACC deaminase from Trichoderma asperellum improves the growth performance of Arabidopsis thaliana under normal and salt stress conditions	Zhang et al.,2015	Transgenic Arabidopsis thaliana plants expressing the 1-aminocyclopropane-1-carboxylate deaminase gene (ACCD) of Trichoderma asperellum ACCC30536 (TaACCD) were created and their growth performance was assessed under normal and salt stress conditions. In order to characterize their growth, root length, root number, fresh weight (FW), relative water content (RWC), seed production, and seed number w…	Rejected	Trichoderma
ACC-deaminase' + ' gene expression' + 'drought stress' + 'plants' +'PGPR'	Google Scholar	ACC deaminase activity in avirulent Agrobacterium tumefaciens D3	Hao et al., 2011	Some plant-growth-promoting bacteria encode the enzyme 1-aminocyclopropane-1-carboxylic acid (ACC) deami- nase, which breaks down ACC, the direct precursor of ethylene biosynthesis in all higher plants, into ammonia and a-keto- butyrate and, as a result, reduces stress ethylene levels in plants caused by a wide range of biotic and abiotic stresses. It was previously shown that ACC deaminase can i…	Rejected	No abiotic stress
ACC-deaminase' + ' gene expression' + 'drought stress' + 'plants' +'PGPR'	Google Scholar	Biological Nitrogen Fixation: Towards Poverty Alleviation through Sustainable Agriculture	Dakora et al., 2008		Rejected	Book
ACC-deaminase' + ' gene expression' + 'drought stress' + 'plants' +'PGPR'	Google Scholar	ACC deaminase positive Enterobacter-mediated mitigation of salinity stress, and plant growth promotion of Cajanus cajan: a lab to field study	Anand et al.,2021	Salinity is a major abiotic stress that negatively impacts plant health and soil microbiota. ACC (1- aminocyclopropane carboxylic acid) deaminase producing microorganisms act as natural stress busters that protect plants from different kinds of stresses. The study focused on the isolation of potent, indigenous, multi-trait ACC deaminase producers. The shortlisted ACC deaminase producers were chec…	Rejected	Proteomic study
ACC-deaminase' + ' gene expression' + 'drought stress' + 'plants' +'PGPR'	Google Scholar	1-Aminocyclopropane-1-Carboxylate Deaminase from Pseudomonas stutzeri A1501 Facilitates the Growth of Rice in the Presence of Salt or Heavy Metals	Han et al., 2015	1-Aminocyclopropane-1-carboxylate (ACC) deaminase, which is encoded by some bacteria, can reduce the amount of ethylene, a root elongation inhibitor, and stimulate the growth of plants under various environmental stresses. The presence of ACC deaminase activity and the regulation of ACC in several rhizospheric bacteria have been reported. The nitrogen-fixing Pseudomonas stutzeri A1501 is capable …	Rejected	No drought stress
ACC-deaminase' + ' gene expression' + 'drought stress' + 'plants' +'PGPR'	Google Scholar	Isolation of ACC deaminase-producing habitat-adapted symbiotic bacteria associated with halophyte Limonium sinense (Girard) Kuntze and evaluating their plant growth-promoting activity under salt stress	Qin et al.,2014	Background and aims Many plant growth-promoting endophytes (PGPE) possessing 1-aminocyclopropane- 1-carboxylate (ACC) deaminase activity can reduce the level of stress ethylene and assist their host plants cope with various biotic and abiotic stresses. However, information about the endophytic bacteria colonizing in the coastal halophytes is still very scarce. This study aims at isolating efficie…	Rejected	No acdS expression
ACC-deaminase' + ' gene expression' + 'drought stress' + 'plants' +'PGPR'	Google Scholar	ACC deaminase‐producing rhizosphere competent Bacillus spp. mitigate salt stress and promote Zea mays growth by modulating ethylene metabolism	Misra et al., 2020	Plant growth-promoting rhizobacteria (PGPR) are known for growth promotion and mitigating environmental stresses. Here, we examined the propitiousness of three indigenous salt-tolerant PGPR, i.e., Bacillus subtilis (NBRI 28B), B. subtilis (NBRI 33 N), and B. safensis (NBRI 12 M) for plant growth promotion and salt stress amelioration in Zea mays. Results of the in vitro plant growth-promoting att…	Rejected	Proteomic study
ACC-deaminase' + ' gene expression' + 'drought stress' + 'plants' +'PGPR'	Google Scholar	Salt and drought stress tolerance with increased biomass in transgenic Pelargonium graveolens through heterologous expression of ACC deaminase gene from Achromobacter xylosoxidans	Singh et al., 2020	Geranium (Pelargonium graveolens) is a strongly aromatic medicinal plant with increasing market demand. The present study demonstrated that the transgenic P. graveolens exhibited a remarkable increase in plant height (~20–23%), total biomass (18–60%), leaf: stem ratio (12–21%) and quantity of oil, compared to its wild-type counterpart. Transgenic P. graveolens expressing ACC deaminase gene from A…	Accepted
ACC-deaminase' + ' gene expression' + 'drought stress' + 'plants' +'PGPR'	Google Scholar	The Production of ACC Deaminase and Trehalose by the Plant Growth Promoting Bacterium Pseudomonas sp. UW4 Synergistically Protect Tomato Plants Against Salt Stress	Orozco-Mosqueda et al., 2019	Soil salinity is a major problem in agriculture. However, crop growth and productivity can be improved by the inoculation of plants with beneficial bacteria that promote plant growth under stress conditions such as high salinity. Here, we evaluated 1-aminocyclopropane-1-carboxylate (ACC) deaminase activity and trehalose accumulation of the plant growth promoting bacterium Pseudomonas sp. UW4. Mut…	Rejected	No drought stress
ACC-deaminase' + ' gene expression' + 'drought stress' + 'plants' +'PGPR'	Google Scholar	Molecular diversity of 1-aminocyclopropane-1-carboxylate (ACC) deaminase producing PGPR from wheat (Triticum aestivum L.) rhizosphere	Gontia-Mishra et al.,2017	Aims The present study was planned to investigate the diversity of 1-aminocyclopropane-1-carboxylate (ACC) deaminase producing bacteria from the rhizosphere of wheat plants and subsequent evaluation of selected PGPR on growth enhancement of wheat seedlings under drought and saline conditions. Methods ACC deaminase producing plant growth promoting rhizobacteria (PGPR) were isolated from the rhizos…	Rejected	Phylogenesis study
ACC-deaminase' + ' gene expression' + 'drought stress' + 'plants' +'PGPR'	Google Scholar	Enhancing the Rice Seedlings Growth Promotion Abilities of Azoarcus sp. CIB by Heterologous Expression of ACC Deaminase to Improve Performance of Plants Exposed to Cadmium Stress	Fernández-Llamosas et al., 2020	Environmental pollutants can generate stress in plants causing increased ethylene production that leads to the inhibition of plant growth. Ethylene production by the stressed plant may be lowered by Plant Growth-Promoting Bacteria (PGPB) that metabolizes the immediate precursor of ethylene 1-aminocyclopropane-1-carboxylate (ACC). Thus, engineering PGPB with ACC deaminase activity can be a promisi…	Rejected	No drought stress
ACC-deaminase' + ' gene expression' + 'drought stress' + 'plants' +'PGPR'	Google Scholar	Selection of ACC deaminase positive, thermohalotolerant and drought tolerance enhancing plant growth-promoting bacteria from rhizospheres of Cyamopsis tetragonoloba grown in arid regions	Goyal et al., 2021	Plant growth-promoting bacteria (PGPBs) are widely acknowl- edged for rescuing crop productivity in regions experiencing biotic/abiotic stresses. However, their implementation in arid regions experiencing severe drought stress has remained elusive. It is reasoned that PGPBs must have extremophilic traits and plant growth promotion capabilities for their application in arid regions. Here we report…	Accepted
ACC-deaminase' + ' gene expression' + 'drought stress' + 'plants' +'PGPR'	Google Scholar	Bacillus amyloliquefaciens Confers Tolerance to Various Abiotic Stresses and Modulates Plant Response to Phytohormones through Osmoprotection and Gene Expression Regulation in Rice	Tiwari et al., 2017	Being sessile in nature, plants have to withstand various adverse environmental stress conditions including both biotic and abiotic stresses. Comparatively, abiotic stresses such as drought, salinity, high temperature, and cold pose major threat to agriculture by negatively impacting plant growth and yield worldwide. Rice is one of the most widely consumed staple cereals across the globe, the pro…	Rejected	Proteomic study
ACC-deaminase' + ' gene expression' + 'drought stress' + 'plants' +'PGPR'	Google Scholar	ACC deaminase-containing plant growth-promoting rhizobacteria protect Papaver somniferum from downy mildew	Barnawal et al.,2017	Aims: The aim of this study was to determine whether ACC (1-aminocy clopropane-1-carboxylic acid) deaminase-containing bacterial treatments could enhance the tolerance of poppy (Papaver somniferum L.) plants against biotic stress of downy mildew caused by Peronospora sp. Methods and Results: Three different genotypes of P. somniferum, that is, Sampada, J-16 and I-14 were included in the experimen…	Rejected	Biotic stress
ACC-deaminase' + ' gene expression' + 'drought stress' + 'plants' +'PGPR'	Google Scholar	Profiling of ACC synthase gene (ACS11) expression in Arabidopsis induced by abiotic stresses	Eun et al., 2019	Abiotic stress induce the production of 1‐aminocyclopropane‐1‐carboxylate (ACC), the precursor of ethylene by activating the enzyme ACC synthase. There are twelve ACC synthase genes reported in the genome of Arabidopsis, and the ACC synthase 11 (ACS11) gene encodes a polypeptide that is functional; however, its involvement in ethylene biosynthesis in response to abiotic stresses remains unclear. …	Rejected	No acdS expression
ACC-deaminase' + ' gene expression' + 'drought stress' + 'plants' +'PGPR'	Google Scholar	Amelioration of high salinity stress damage by plant growth- promoting bacterial endophytes that contain ACC deaminase	Ali et al., 2014	Plant growth and productivity is negatively affected by soil salinity. However, it is predicted that plant growth-promoting bacterial (PGPB) endophytes that contain 1-aminocyclopropane-1-carboxylate (ACC) deaminase (E.C. 4.1.99.4) can facilitate plant growth and development in the presence of a number of different stresses. In present study, the ability of ACC deaminase containing PGPB endophytes…	Rejected	Proteomic study
ACC-deaminase' + ' gene expression' + 'drought stress' + 'plants' +'PGPR'	Google Scholar	Biological characteristics and salt‐tolerant plant growth‐promoting effects of an ACC deaminase‐producing Burkholderia pyrrocinia strain isolated from the tea rhizosphere	Han et al.,2021	Plant growth-promoting rhizobacteria that produce 1-aminocyclopropane-1-carboxylic acid (ACC) deaminase can promote plant growth and enhance abiotic stress tolerance. In this study, Burkholderia pyrrocinia strain P10, with an ACC deaminase activity of 33.01-μmol/h/mg protein, was isolated from the tea rhizosphere and identified based on morphological, biochemical, and molecular characteristics. I…	Rejected	Proteomic study
ACC-deaminase' + ' gene expression' + 'drought stress' + 'plants' +'PGPR'	Google Scholar	Exploitation of agro-climatic environment for selection of 1- aminocyclopropane-1-carboxylic acid (ACC) deaminase producing salt tolerant indigenous plant growth promoting rhizobacteria	Misra et al., 2017	A comprehensive survey for 09 agro-climatic zones of Uttar Pradesh, India was conducted to isolate and char- acterize salt tolerant 1-aminocyclopropane-1-carboxylic acid (ACC) deaminase possessing plant growth pro- moting (PGP) rhizobacteria for salt stress amelioration in rice. Here, we have isolated 1125 bacteria having the ability to tolerate 1M NaCl and out of those, 560 were screened for uti…	Rejected	Proteomic study
ACC-deaminase' + ' gene expression' + 'drought stress' + 'plants' +'PGPR'	Google Scholar	Cold stress alleviation using individual and combined inoculation of ACC deaminase producing microbes in Ocimum sanctum	Singh et al.,2020	Cold stress in Ocimum sanctum is a major constraint to crop productivity in certain geographical regions. The current study was carried out to examine the effect of consortia of ACC deaminase producing microbes in reducing cold-induced damage in O. sanctum during winters to enable farmers to have O. sanctum as multi-cut crop. The effect of single and combined inoculation of ACC-deaminase producin…	Rejected	Proteomic study
ACC-deaminase' + ' gene expression' + 'drought stress' + 'plants' +'PGPR'	Google Scholar	Synergistic effect of Chryseobacterium gleum sp. SUK with ACC deaminase activity in alleviation of salt stress and plant growth promotion in Triticum aestivum L.	Bhise et al.,2017	Soil salinity is major abiotic stresses affecting morphological, biochemical and physiological processes of plant growth. Chryseobacterium gleum sp. SUK isolated from salt-stressed soil exhibited ACC (1-aminocyclo- propane-1-carboxylate) deaminase activity with IAA (in- dole acetic acid), siderophore, ammonia, hydrogen cyanide production, 2% salt tolerance and fungal cell wall degrading enzyme pr…	Rejected	Proteomic study
ACC-deaminase' + ' gene expression' + 'drought stress' + 'plants' +'PGPR'	Google Scholar	ACC Deaminase Producing Bacteria With Multifarious Plant Growth Promoting Traits Alleviates Salinity Stress in French Bean (Phaseolus vulgaris) Plants	Gupta et al., 2019	Plant growth promoting rhizobacteria (PGPR) with 1-aminocyclopropane-1-carboxylic acid (ACC) deaminase activity has the potential to promote plant growth and development under adverse environmental conditions. In the present study, rhizobacterial strains were isolated from Garlic (Allium sativum) rhizosphere and were screened in vitro ACC deaminase activity in DF salt minimal media supplemented w…	Rejected	Proteomic study
ACC-deaminase' + ' gene expression' + 'drought stress' + 'plants' +'PGPR'	Google Scholar	Pseudomonas 1-Aminocyclopropane-1-carboxylate (ACC) Deaminase and Its Role in Beneficial Plant-Microbe Interactions	Glick et al., 2021	The expression of the enzyme 1-aminocylopropane-1-carboxylate (ACC) deaminase, and the consequent modulation of plant ACC and ethylene concentrations, is one of the most important features of plant-associated bacteria. By decreasing plant ACC and ethylene concentrations, ACC deaminase-producing bacteria can overcome some of the deleterious effects of inhibitory levels of ACC and ethylene in vario…	Rejected	Review
ACC-deaminase' + ' gene expression' + 'drought stress' + 'plants' +'PGPR'	Google Scholar	Characterization of ACC deaminase gene in Pseudomonas entomophila strain PS-PJH isolated from the rhizosphere soil	Kannan et al., 2010	The enzyme 1-aminocyclopropane-1-carboxylate (ACC) deaminase cleaves the ethylene precur- sor ACC into α-ketobutyrate and ammonia. The decreased level of ethylene allows the plant to be more resistant to a wide environmental stress including plant pathogens. In the present study, we characterized the ACC deaminase activity of a Pseudomonas entomophila strain PS-PJH isolated from the red pepper rh…	Rejected	Proteomic study
ACC-deaminase' + ' gene expression' + 'drought stress' + 'plants' +'PGPR'	Google Scholar	Study of the siderophore-producing Trichoderma asperellum Q1 on cucumber growth promotion under salt stress	Qi et al., 2012	Trichoderma spp. are versatile beneficial fungi which can stimulate growth and plant resistance to biotic and abiotic stresses. In this study, the potential of Trichoderma isolate in promoting the cucumber growth under salt stress and its possible mechanisms were investigated. Strain Q1 was isolated from the rhizosphere of cucumber in greenhouse in China and identified as Trichoderma asperellum b…	Rejected	Trichoderma
ACC-deaminase' + ' gene expression' + 'drought stress' + 'plants' +'PGPR'	Google Scholar	ACC deaminase containing diazotrophic endophytic bacteria ameliorate salt stress in Catharanthus roseus through reduced ethylene levels and induction of antioxidative defense systems	Karthikeyan et al., 2012	Among a total of 27 cultivable salt tolerant endo- phytic bacteria isolated from Catharanthus roseus grown in highly salt affected coastal region of cuddalore district, Tamilnadu, India four isolates were found to be positive for nitrogenase activity. The isolates were evaluated for their stress tolerance efficiency and screened for different PGP traits. Based on the above studied parameters, and…	Rejected	Proteomic study
ACC-deaminase' + ' gene expression' + 'drought stress' + 'plants' +'PGPR'	Google Scholar	Mesorhizobium ciceri LMS-1 expressing an exogenous 1-aminocyclopropane-1-carboxylate (ACC) deaminase increases its nodulation abilities and chickpea plant resistance to soil constraints	Nascimento et al., 2012		Rejected	Duplicate
ACC-deaminase' + ' gene expression' + 'drought stress' + 'plants' +'PGPR'	Google Scholar	ACC deaminase-producing bacteria mediated drought and salt tolerance in Capsicum annuum	Maxton et al., 2018	Influence of drought and salt stress on different morphological and physiological growth parameters in Capsicum annuum inoculated with our isolates was estimated during the present study. Bulkhorderia cepacia was reported to possess the maximal, whereas Citrobacter feurendii the least plant growth promoting efficacy under salt and drought stress. ACC Deaminase activity of purified B. cepacia, C. …	Rejected	Proteomic study
ACC-deaminase' + ' gene expression' + 'drought stress' + 'plants' +'PGPR'	Google Scholar	Rhizobial ACC deaminase contributes to efficient symbiosis with pea (Pisum sativum L.) under single and combined cadmium and water deficit stress	Belimov et al., 2019	This research aimed to study interactions between nodule bacteria (rhizobia) containing ACC deaminase and legume plants subjected to combined environmental stresses caused by drought and heavy metals (cadmium – Cd). A Cd-tolerant strain of Rhizobium leguminosarum bv. viciae 1066S containing ACC deaminase and resistant to streptomycin was selected, and its ACC deaminase knock-out mutant RlM1 obtai…	Accepted
ACC-deaminase' + ' gene expression' + 'drought stress' + 'plants' +'PGPR'	Google Scholar	Enhanced salinity tolerance in the common bean (Phaseolus vulgaris) plants using twin ACC deaminase producing rhizobacterial inoculation	Gupta et al., 2020	The present study demonstrates the efficacy of consortium inoculum formulated with two salt-tolerant, 1-Amino- cyclopropane-1-carboxylate (ACC) deaminase producing, Aneurinibacillus aneurinilyticus strain AIOA1 (MH645748) and Paenibacillus sp. strain SG_AIOA2 (MH645749) on common bean plants grown under saline stress (100 mM) conditions. Initially, the common bean seeds were inoculated by coating…	Rejected	Proteomic study
ACC-deaminase' + ' gene expression' + 'drought stress' + 'plants' +'PGPR'	Google Scholar	Synergistic interactions between the ACC deaminase-producing bacterium Pseudomonas putida UW4 and the AM fungus Gigaspora rosea positivelya¡ectcucumberplantgrowth	Gamalero et al., 2008	Bacteria producing 1-aminocyclopropane-1-carboxylate (ACC) deaminase modulate plant ethylene levels. Decreased ethylene levels increase plant tolerance to environmental stresses and promote legume nodulation. On the contrary, the role of ethylene in mycorrhizal symbiosis establishment is still controversial. In this work, the ACC deaminase-producing strain Pseudomonas putida UW4 AcdS1 and its mut…	Rejected	No acdS expression
ACC-deaminase' + ' gene expression' + 'drought stress' + 'plants' +'PGPR'	Google Scholar	1-Aminocyclopropane-1-carboxylate (ACC) Deaminase-Producing Endophytic Diazotrophic Enterobacter sp. EN-21 Modulates Salt–Stress Response in Sugarcane	Kruasuwan et al.,2018	Soil salinity is a wide-reaching environmental problem that lowers the yield of commercial crops such as maize, rice, and sug- arcane. In this study, we examined the effect of 1-aminocyclopropane-1-carboxylate (ACC) deaminase-producing endophytic diazotrophic Enterobacter sp. EN-21 on growth promotion, salt tolerance, and root colonization of sugarcane. Enterobacter sp. EN-21 inoculated and unino…	Rejected	No acdS expression
ACC-deaminase' + ' gene expression' + 'drought stress' + 'plants' +'PGPR'	Google Scholar	Surface display of ACC deaminase on endophytic Enterobacteriaceae strains to increase saline resistance of host rice sprouts by regulating plant ethylene synthesis	Liu et al., 2017	Background: Most endophytic bacteria in consortia, which provide robust and broad metabolic capacity, are attractive for applications in plant metabolic engineering. The aim of this study was to investigate the effects of engineered endophytic bacterial strains on rice sprout ethylene level and growth under saline stress. A protocol was developed to synthesize engineered strains by expressing bac…	Rejected	No drought stress
ACC-deaminase' + ' gene expression' + 'drought stress' + 'plants' +'PGPR'	Google Scholar	Algerian Sahara PGPR confers maize root tolerance to salt and aluminum toxicity via ACC deaminase and IAA	Zerrouk et al., 2019	The increase of the world’s population and the decrease of arable land due to abiotic stresses, especially salinity and heavy metals, are causing growing concerns over agricultural sustainability. The application of Plant Growth-Promoting Rhizobacteria (PGPR) is considered as a useful tool to reverse such environmental stressors. The aim of the study is to investigate the growth-promoting effects…	Rejected	Proteomic study
ACC-deaminase' + ' gene expression' + 'drought stress' + 'plants' +'PGPR'	Google Scholar	Exogenous ACC Deaminase Is Key to Improving the Performance of Pasture Legume-Rhizobial Symbioses in the Presence of a High Manganese Concentration	Paço et al.,2020	Manganese (Mn) toxicity is a very common soil stress around the world, which is responsible for low soil fertility. This manuscript evaluates the effect of the endophytic bacterium Pseudomonas sp. Q1 on different rhizobial-legume symbioses in the absence and presence of Mn toxicity. Three legume species, Cicer arietinum (chickpea), Trifolium subterraneum (subterranean clover), and Medicago polymo…	Rejected	No drought stress
ACC-deaminase' + ' gene expression' + 'drought stress' + 'plants' +'PGPR'	Google Scholar	Plant growth promoting ability of ACC deaminase producing rhizobacteria native to Sunflower (Helianthus annuus L.)	Brijesh Singh et al., 2019	Rhizobacteria inhabiting the soil adhering to the root of the host plants are generally recognized to possess plant growth promoting properties. In the present study, a total of 120 rhizobacterial isolates from native soil samples of sunflower were isolated and screened for their ACC deaminase (ACCd) activity and plant growth promoting properties. A significant ACCd activity ranging between 322.5…	Rejected	No abiotic stress
ACC-deaminase' + ' gene expression' + 'drought stress' + 'plants' +'PGPR'	Google Scholar	Differentiation of 1-aminocyclopropane-1-carboxylate (ACC) deaminase from its homologs is the key for identifying bacteria containing ACC deaminase	Li et al., 2015	1-Aminocyclopropane-1-carboxylate (ACC) deaminase-mediated reduction of ethylene generation in plants under abiotic stresses is a key mechanism by which bacteria can promote plant growth. Misidentification of ACC deaminase and the ACC deaminase structure gene (acdS) can lead to overestimation of the number of bacteria containing ACC deaminase and their function in ecosystems. Previous non-specifi…	Rejected	No abiotic stress
ACC-deaminase' + ' gene expression' + 'drought stress' + 'plants' +'PGPR'	Google Scholar	Alleviation of salinity-induced damage on wheat plant by an ACC deaminase-producing halophilic bacterium Serratia sp. SL- 12 isolated from a salt lake	Singh-Jha, 2016	Plant growth promoting bacteria (PGPB) with 1- aminocyclopropane-1-carboxylate deaminase (ACC deami- nase) activity can be used to ameliorate salt stress in plants. The aim of this study was to characterize a salt-tolerant PGP bacterium Serratia sp. SL-12 isolated from a salt lake, and to evaluate its capability to promote growth in wheat plants (Triticum aestivum L) under conditions of salt stre…	Rejected	Proteomic study
ACC-deaminase' + ' gene expression' + 'drought stress' + 'plants' +'PGPR'	Google Scholar	Modulation of salt tolerance in thai jasmine rice (Oryza sativa L. cv. KDML105) by Streptomyces venezuelae ATCC 10712 expressing ACC deaminase	Yoolong et al., 2019	1-Aminocyclopropane-1-carboxylate (ACC) deaminase is a plant growth promoting (PGP) trait found in beneficial bacteria including streptomycetes and responsible for stress modulation. The ACC deaminase gene, acdS, of S. venezuelae ATCC 10712 was cloned into an expression plasmid, pIJ86, to generate S. venezuelae/pIJ86-acdS. Expression of acdS and production of ACC deaminase of S. venezuelae/pIJ86-…	Rejected	No drought stress
ACC-deaminase' + ' gene expression' + 'drought stress' + 'plants' +'PGPR'	Google Scholar	Do low-ethylene-producing transgenic canola (Brassica napus) plants expressing the ACC deaminase gene differ from wild-type plants in response to UVB radiation?	Qaderi et al., 2007	Few studies have considered ethylene involvement in plant responses to ultraviolet-B (UVB) radiation. We studied the responses to UVB radiation of one wild-type (WT, ‘Westar’) canola (Brassica napus L.) with normal ethylene evolution and two transgenic (C1, C2) lines with lower ethylene evolution. Canola plants were grown under biologically effective levels of UVB (UVBBE) radiation: 0.03 (low), 4…	Rejected	No drought stress
ACC-deaminase' + ' gene expression' + 'drought stress' + 'plants' +'PGPR'	Google Scholar	Effect of mustard rhizobacteria on wheat growth promotion under cadmium stress: characterization of acdS gene coding ACC deaminase	Govindasamy et al.,2015	Ten mustard rhizobacterial isolates that utilize 1- aminocyclopropane-1-carboxylate (ACC) as sole nitrogen source were screened for plant growth-promoting traits. These isolates enhanced root elongation significantly and minimized ethylene synthesis in wheat seedlings under induced cadmium stress condition. The presence of acdS gene coding for ACC deaminase was tested through gene-specific PCR am…	Rejected	No drought stress
ACC-deaminase' + ' gene expression' + 'drought stress' + 'plants' +'PGPR'	Google Scholar	Effects of the inoculations using bacteria producing ACC deaminase on ethylene metabolism and growth of wheat grown under different soil water contents	Zhang et al., 2018	Crop growth and productivity are often impacted by the increased ethylene content induced by adverse en- vironmental conditions such drought. Inoculations with bacteria producing ACC deaminase is considered as a potential biological approach to improve the growth and tolerance of stressed plants by lowering endogenous ethylene level. In this study, germinated wheat seeds were inoculated using thr…	Rejected	Proteomic study
ACC-deaminase' + ' gene expression' + 'drought stress' + 'plants' +'PGPR'	Google Scholar	Field performance of bacterial inoculants to alleviate water stress effects in wheat (Triticum aestivum L.)	Chandra et al.,2019	Aims Plant growth promoting bacteria (PGPB) contain- ing 1-aminocyclopropane-1-carboxylate (ACC) deami- nase can play an important role in abiotic stress toler- ance in plants, particularly drought. The objective of this study was to evaluate bacterial strains Variovorax paradoxus RAA3, Pseudomonas palleroniana DPB16, Pseudomonas sp. UW4 for their ability to alleviate drought stress in wheat in f…	Rejected	Proteomic study
ACC-deaminase' + ' gene expression' + 'drought stress' + 'plants' +'PGPR'	Google Scholar	ACC deaminase-producing Brevibacterium linens RS16 enhances heat-stress tolerance of rice (Oryza sativa L.)	Choi et al., 2021	The rapid rise in global temperature has adverse effects on rice productivity. The lack of eminent resources for heat stress alleviation is threatening the agricultural sector. Heat stress alleviation by endophytic plant growth-promoting bacteria (PGPB) can be a sustainable and eco-friendly approach. The present study was conducted to check the colonization of Brevibacterium linens RS16 producing…	Rejected	Proteomic study
ACC-deaminase' + ' gene expression' + 'drought stress' + 'plants' +'PGPR'	Google Scholar	Mechanistic elucidation of germination potential and growth of wheat T inoculated with exopolysaccharide and ACC- deaminase producing Bacillus strains under induced salinity stress	Amna et al., 2019	The potential of plant growth regulating microorganisms present in the soil can be explored towards the purpose of identifying salt tolerant strategies and crop cultivars. Current study was designed to elucidate the capabilities of salt stress tolerant plant growth promoting rhizobacteria (PGPR) Bacillus siamensis (PM13), Bacillus sp. (PM15) and Bacillus methylotrophicus (PM19) in undermining the…	Rejected	Proteomic study
ACC-deaminase' + ' gene expression' + 'drought stress' + 'plants' +'PGPR'	Google Scholar	The PGPR Stenotrophomonas maltophilia SBP-9 Augments Resistance against Biotic and Abiotic Stress in Wheat Plants	Singh et al., 2017	Certain plant growth promoting bacteria have ability to ameliorate abiotic and/or biotic stressors, which can be exploited to enhance plant growth and productivity of the plants under stress conditions. Therefore, the present study aimed to examine the role of a rhizospheric bacterial isolate SBP-9 isolated from Sorghum bicolor (i) in promoting the wheat plant growth under salinity stress, and (i…	Rejected	Proteomic study
ACC-deaminase' + ' gene expression' + 'drought stress' + 'plants' +'PGPR'	Google Scholar	Label-free proteomics approach reveals candidate proteins in rice (Oryza sativa L.) important for ACC deaminase producing bacteria-mediated tolerance against salt stress	Roy Choudhury et al., 2022	The omics-based studies are important for identifying characteristic proteins in plants to elucidate the mechanism of ACC deaminase producing bacteria mediated salt tolerance. This study evaluates the changes in the proteome of rice inoculated with ACC deaminase producing bacteria under salt-stress con- ditions. Salt stress resulted in a significant decrease in photosynthetic pigments, whereas in…	Rejected	Proteomic study
ACC-deaminase' + ' gene expression' + 'drought stress' + 'plants' +'PGPR'	Google Scholar	Ectopic expression of bacterial 1-aminocyclopropane 1-carboxylate deaminase in Chlamydomonas reinhardtii enhances algal biomass and lipid content under nitrogen deficit condition	Srinivasan et al., 2021	1-Aminocyclopropane-1-carboxylate (ACC) deaminase is a well-known bacterial producing enzyme that helps plants to overcome stress conditions by modulating ethylene biosynthesis. However, the functional role of ACC deaminase and ethylene in microalgae during stress remains to be explored. In this study, to investigate the role of ACC deaminase (acds) from Pseudomonas putida UW4 in enhancing the bi…	Rejected	No drought stress
ACC-deaminase' + ' gene expression' + 'drought stress' + 'plants' +'PGPR'	Google Scholar	Regulation of Ethylene Biosynthesis Under Salt Stress in Red Pepper (Capsicum annuum L.) by 1-Aminocyclopropane-1- Carboxylic Acid (ACC) Deaminase-producing Halotolerant Bacteria	Siddikee et al., 2012	The present study was carried out to understand the mechanism of salt stress amelioration in red pepper plants by inoculation of 1-aminocyclopropane-1-carboxylic acid (ACC) deaminase-producing halotolerant bacteria. In general, ethylene production, ACC concentration, ACC synthase (ACS), and ACC oxidase (ACO) enzyme activi- ties increased with increasing levels of salt stress. Treat- ment with hal…	Rejected	Proteomic study
ACC-deaminase' + ' gene expression' + 'drought stress' + 'plants' +'PGPR'	Google Scholar	The presence of a 1- aminocyclopropane -1- carboxylate (ACC) deaminase deletion mutation alters the physiology of the endophytic plant growth-promoting bacterium Burkholderia phyto¢rmans PsJN	Sun et al., 2009	The structural gene for 1-aminocyclopropane-1-carboxylate (ACC) deaminase (acdS) from the endophytic plant growth-promoting bacterium Burkholderia phytofirmans PsJN was isolated and used to construct a mutant strain B. phytofir- mans YS2 (B. phytofirmans PsJN/DacdS), in which an internal segment of the acdS gene was deleted. The mutant YS2 lost ACC deaminase activity as well as the ability to pro…	Rejected	No abiotic stress
ACC-deaminase' + ' gene expression' + 'drought stress' + 'plants' +'PGPR'	Google Scholar	Mitigation of Heat Stress in Solanum lycopersicum L. by ACC-deaminase and Exopolysaccharide Producing Bacillus cereus: Effects on Biochemical Profiling	Mukhtar et al., 2020	Soil microorganisms might be assessed for their capabilities of plant growth promotion in order to identify heat tolerant strategies for crop production. The planned study was conducted to determine the potential of heat tolerant plant growth promoting rhizobacteria (PGPR) in mitigating heat stress effects in tomato. Bacillus cereus was evaluated for plant growth promoting activities and assessed…	Rejected	Proteomic study
ACC-deaminase' + ' gene expression' + 'drought stress' + 'plants' +'PGPR'	Google Scholar	Effect of ACC-deaminase producing Bacillus cereus brm on the growth of Vigna radiata (Mung beans) under salinity stress	Vishal et al., 2015	Bacillus cereus brm isolated from the rhizosphere of Brassica nigra growing in the saline desert of Radhanpur (India), was identified on the basis of biochemical and 16S rDNA analysis. Salinity stress induces higher levels of ethylene in plants which limits crop production. This increased concentration of ethylene can be reduced by using plant growth promoting rhizobacteria (PGPR) producing ACC- …	Rejected	Proteomic study
ACC-deaminase' + ' gene expression' + 'drought stress' + 'plants' +'PGPR'	Google Scholar	ACC DEAMINASE PRODUCING PGPR INVOKE CHANGES IN ANTIOXIDANT SYSTEMS TO MINIMIZE THE ADVERSE EFFECTS OF SALT IN SUNFLOWER	Singh et al., 2019	In the present study, we demonstrated that the inoculation improved the growth of sunflower plants in upon salt stress with ACC deaminase producing plant growth promoting rhizobacteria (PGPR) isolates (Pseudomonas otitidis Rhizo SF 7 and Acinetobacter calcoaceticus Rhizo SF 9). Sunflower plants treated with both ACCd producing PGPR isolates exhibited significant improvement in plant height, shoot…	Rejected	Proteomic study
ACC-deaminase' + ' gene expression' + 'drought stress' + 'plants' +'PGPR'	Google Scholar	Effect of heavy metals on acdS gene expression in Herbaspirillium sp. GW103 isolated from rhizosphere soil	Loganathan et al., 2015	This study aimed to understand the influence of heavy metals on 1-aminocyclopropane-1- carboxylate deaminase activity (ACCD) and acdS gene expression in Herbaspirillium sp. GW103. The GW103 strain ACCD activity decreased in cells grown in a medium supplemented with Pb and As, whereas cells grown in medium supplemented with Cu showed increase in enzyme activity. The GW103 strain produced 262.2 _x0…	Rejected	No drought stress
ACC-deaminase' + ' gene expression' + 'drought stress' + 'plants' +'PGPR'	Google Scholar	ACC Deaminase-Containing Bacillus subtilis Reduces Stress Ethylene-Induced Damage and Improves Mycorrhizal Colonization and Rhizobial Nodulation in Trigonella foenum-graecum Under Drought Stress	Barnawal et al.,2013	This study was aimed at protecting Trigonella plants by reducing stress ethylene levels through ACC (1-aminocyclopropane-1-carboxylic acid) deaminase-containing Bacillus subtilis (LDR2) and promoting plant growth through improved colonization of beneficial microbes like Ensifer meliloti (Em) and Rhizophagus ir- regularis (Ri) under drought stress. A plant growth-promoting rhizobacterium strain po…	Rejected	Proteomic study
ACC-deaminase' + ' gene expression' + 'drought stress' + 'plants' +'PGPR'	Google Scholar	Overexpression of 1-Aminocyclopropane-1-Carboxylic Acid Deaminase (acdS) Gene in Petunia hybrida Improves Tolerance to Abiotic Stresses	Naing et al., 2021	Abiotic stress induces the ethylene precursor 1-aminocyclopropane-1-carboxylic acid (ACC) in plants, which consequently enhances ethylene production and inhibits plant growth. The bacterial ACC deaminase enzyme encoded by the acdS gene reduces stress-induced ethylene production and improves plant growth in response to stress. In this study, overexpression of acdS in Petunia hybrida (‘Mirage Rose’…	Accepted
ACC-deaminase' + ' gene expression' + 'drought stress' + 'plants' +'PGPR'	Google Scholar	Overexpression of carnation S-adenosylmethionine decarboxylase gene generates a broad-spectrum tolerance to abiotic stresses in transgenic tobacco plants	Wi et al.,2006	Polyamines (PAs), such as putrescine, spermidine, and spermine, are present in all living organism and implicate in a wide range of cellular physiological processes. We have used transgenic technology in an attempt to evaluate their potential for mitigating the ad- verse effects of several abiotic stresses in plants. Sense construct of full-length cDNA for S-adenosylmethionine decarboxylase (SAMD…	Rejected	No acdS expression
ACC-deaminase' + ' gene expression' + 'drought stress' + 'plants' +'PGPR'	Google Scholar	Enhanced chickpea growth-promotion ability of a Mesorhizobium strain expressing an exogenous ACC deaminase gene	Nascimento et al., 2012	Aims The main goal of the study reported herein was to assess the nodulation performance of a Mesorhizobium strain transformed with an exogenous ACC deami- nase gene (acdS), and its subsequent ability to increase chickpea plant growth under normal and waterlogged conditions. Methods The Mesorhizobium ciceri strain LMS-1 was transformed with the acdS gene of Pseudomonas putida UW4 by triparental c…	Accepted
ACC-deaminase' + ' gene expression' + 'drought stress' + 'plants' +'PGPR'	Google Scholar	Streptomyces spp. enhance vegetative growth of maize plants under saline stress	Nozari et al.,2021	Saline stress is one of the abiotic stresses that most compromises the yield of crops and can be mitigated by plant growth- promoting rhizobacteria (PGPR). This work characterized rhizobacteria isolates from the genus Streptomyces as PGPR and evaluated their role on growth and alleviation of the effects caused by saline stress in maize (Zea mays L.). Production of indolic compounds (IC), sideroph…	Rejected	Proteomic study
ACC-deaminase' + ' gene expression' + 'drought stress' + 'plants' +'PGPR'	Google Scholar	Bacterial Modulation of the Plant Ethylene Signaling Pathway Improves Tolerance to Salt Stress in Lettuce (Lactuca sativa L.)	Fortt et al., 2022	Salinity has extensive adverse effects on plant growth and the development of new agronomic strategies to improve crop salt tolerance is becoming necessary. Currently, the use of plant growth promoting rhizobacteria (PGPR) to mitigate abiotic stress in crops is of increasing interest. The most analyzed mechanism is based on ACC deaminase activity, an enzyme that decreases the ethylene synthesis, …	Rejected	No acdS expression
ACC-deaminase' + ' gene expression' + 'drought stress' + 'plants' +'PGPR'	Google Scholar	INTERACTION OF ACC DEAMINASE AND ANTIOXIDANT ENZYMES TO INDUCE DROUGHT TOLERANCE IN ENTEROBACTER CLOACAE 2WC2 INOCULATED MAIZE GENOTYPES	MAQBOOL et al., 2021	Beneficial endophytic bacteria are well known for plant growth enhancement, induced plant defense responses and antioxidant activities that confer resistance against various biotic and abiotic stresses by utilization of 1-aminocyclopropane- 1-carboxylate deaminase activity. A plant growth promoting endophytic (PGPE) bacteria Enterobacter cloacae 2WC2 strain was investigated for its role in drough…	Rejected	Proteomic study
ACC-deaminase' + ' gene expression' + 'drought stress' + 'plants' +'PGPR'	Google Scholar	Expression of an exogenous 1-aminocyclopropane-1-carboxylate deaminase gene in psychrotolerant bacteria modulates ethylene metabolism and cold induced genes in tomato under chilling stress	Subramanian et al., 2015	The role of stress induced ethylene under low temperature stress has been controversial and hitherto remains unclear. In the present study, 1-aminocyclopropane-1-carboxylate deaminase (ACCD) gene, acdS expressing mutant strains were generated from ACCD negative psychrotolerant bacterial strains Fla- vobacterium sp. OR306 and Pseudomonas frederiksbergensis OS211, isolated from agricultural soil du…	Rejected	No drought stress
ACC-deaminase' + ' gene expression' + 'drought stress' + 'plants' +'PGPR'	Google Scholar	ACC deaminase and IAA producing growth promoting bacteria from the rhizosphere soil of tropical rice plants	Bal et al., 2013	Beneficial plant-associated bacteria play a key role in supporting and/or promoting plant growth and health. Plant growth promoting bacteria present in the rhizosphere of crop plants can directly affect plant metabolism or modulate phytohormone production or degradation. We isolated 355 bacteria from the rhizosphere of rice plants grown in the farmers’ fields in the coastal rice field soil from f…	Rejected	Proteomic study
ACC-deaminase' + ' gene expression' + 'drought stress' + 'plants' +'PGPR'	Google Scholar	ACC Deaminase-Containing Rhizobacteria from Rhizosphere of Zygophyllum coccineum Alleviate Salt Stress Impact on Wheat (Triticum aestivum L.)	Khalifa et al., 2020	Plant growth-promoting bacteria are present in the rhizosphere, a soil zone around plant roots. An important mechanism of plant growth enhancement is the production of 1-aminocyclopropane-1-carboxylic acid (ACC) deaminase. Three ACC deaminase-producing bacterial strains were isolated from the rhizosphere of the halophytic plant Zygophyllum coccineum growing in Al-Uqair, Al-Ahsa, Saudi Arabia. The…	Rejected	Proteomic study
ACC-deaminase' + ' gene expression' + 'drought stress' + 'plants' +'PGPR'	Google Scholar	Expression of an exogenous 1-aminocyclopropane-1-carboxylate deaminase gene in Mesorhizobium spp. reduces the negative effects of salt stress in chickpea	Brìgido et al., 2013	Our goal was to study the symbiotic performance of two Mesorhizobium ciceri strains, transformed with an exogenous 1-aminocyclopropane-1-carboxylate deaminase gene (acdS), in chickpea plants under salinity stress. The EE-7 (salt-sensitive) and G-55 (salt-tolerant) M. ciceri strains were transformed with an acdS gene present on plasmid pRKACC. Salinity significantly reduced the overall growth of p…	Rejected	No drought stress
ACC-deaminase' + ' gene expression' + 'drought stress' + 'plants' +'PGPR'	Google Scholar	ACC-deaminase and EPS Production by Salt Tolerant Rhizobacteria Augment Growth in Chickpea under Salinity Stress	Kumari et al., 2015	Application of salt tolerant rhizobacteria containing 1-aminocyclopropane-1- carboxylic acid (ACC) deaminase and exopolysachharide activity in salt-affected soil can play an important role in alleviating soil salinity stress during plant growth. Out of 66 rhizobacterial strains screened for ACC-deaminase activity, 29 isolates exhibited growth in DF minimal salt medium supplemented with ACC. In li…	Rejected	Proteomic study
ACC-deaminase' + ' gene expression' + 'drought stress' + 'plants' +'PGPR'	Google Scholar	Soil type affects plant colonization, activity and catabolic gene expression of inoculated bacterial strains during phytoremediation of diesel	Afzal et al., 2021	The combined use of plants and associated microorganisms has great potential for cleaning up soils contaminated with petroleum hydrocarbons. Apart from environmental conditions the physicochemical properties of the soil are the main factors influencing the survival and activity of an inoculated strain as well as the growth of plants. This study examined the effect of different soil types (sandy, …	Rejected	No abiotic stress
ACC-deaminase' + ' gene expression' + 'drought stress' + 'plants' +'PGPR'	Google Scholar	Gene expression profiling through microarray analysis in Arabidopsis thaliana colonized by Pseudomonas putida MTCC5279, a plant growth promoting rhizobacterium	Srivastava et al., 2012	Plant growth promotion is a multigenic process under the influence of many factors; therefore an understanding of these processes and the functions regulated may have profound implications. Present study reports microarray analysis of Arabidopsis thaliana plants inoculated with Pseudomonas putida MTCC5279 (MTCC5279) which resulted in significant increase in growth traits as compared with non-inoc…	Rejected	No acdS expression
ACC-deaminase' + ' gene expression' + 'drought stress' + 'plants' +'PGPR'	Google Scholar	Evaluation of ACC deaminase producing Pseudomonas fluorescens strains for their effects on seed germination and early growth of wheat under salt stress	Safari et al., 2018	Plant growth-promoting rhizobacteria possessing ACC deaminase activity reduces the level of stress ethylene, conferring resistance and improving plant growth under different stress conditions. The present study aims at evaluating Pseudomonas fluorescens strains for their potential to produce ACC deaminase and quantifying their effects on seed germination and seedling growth of wheat under salinit…	Rejected	No acdS expression
ACC-deaminase' + ' gene expression' + 'drought stress' + 'plants' +'PGPR'	Google Scholar	Drought-Tolerant Pseudomonas spp. Improve the Growth Performance of Finger Millet (Eleusine coracana (L.) Gaertn.) Under Non-Stressed and Drought-Stressed Conditions	Chandra et al., 2018	Application of plant growth-promoting bacteria (PGPB) is an environmentally sustainable option to reduce the effects of abi- otic and biotic stresses on plant growth and productivity. Three 1-aminocyclopropane-1-carboxylic acid (ACC) deaminase-producing drought-tolerant bacteria were isolated from a rain-fed agriculture field in the Central Himalaya of Kumaun region, Uttarakhand, India and evalua…	Rejected	Proteomic study
ACC-deaminase' + ' gene expression' + 'drought stress' + 'plants' +'PGPR'	Google Scholar	ACC deaminase-containing Arthrobacter protophormiae induces NaCl stress tolerance through reduced ACC oxidase activity and ethylene production resulting in improved nodulation and mycorrhization in Pisum sativum	Barnawal et al., 2014	Induction of stress ethylene production in the plant system is one of the consequences of salt stress which apart from being toxic to the plant also inhibits mycorrhizal colonization and rhizobial nodulation by oxidative damage. Tolerance to salinity in pea plants was assessed by reducing stress ethylene levels through ACC deaminase-containing rhizobacteria Arthrobacter protophormiae (SA3) and pr…	Rejected	Proteomic study
ACC-deaminase' + ' gene expression' + 'drought stress' + 'plants' +'PGPR'	Google Scholar	Plant growth-promoting effects of Hartmannibacter diazotrophicus on summer barley (Hordeum vulgare L.) under salt stress	Suarez et al., 2015	Soil salination is a major concern of modern agriculture, specifically regarding irrigation and arid regions. However, plant growth promoting rhizobacteria (PGPR) can increase plant resistance to abiotic stress and represent an environmental friendly approach to alleviate salt stress in crops. The plant growth promoting (PGP) activities of Hartmannibacter diazotrophicus E19T, a new genus recently…	Rejected	Proteomic study
ACC-deaminase' + ' gene expression' + 'drought stress' + 'plants' +'PGPR'	Google Scholar	Characterization of plant growth-promoting bacteria associated with rice cropped in iron-stressed soils	de Souza et al., 2015	Plant growth-promoting rhizobacteria (PGPR) are able to promote plant growth using a wide variety of mechanisms as well as provide bioprotection against biotic and abiotic stresses. The objectives of this study were to isolate and characterize putative PGPR associated with rice cultivars with a distinct tolerance to iron toxicity grown in two areas: one area with a well- established history of ir…	Rejected	Proteomic study
ACC-deaminase' + ' gene expression' + 'drought stress' + 'plants' +'PGPR'	Google Scholar	Amelioration of drought tolerance in wheat by the interaction of plant growth-promoting rhizobacteria	Gontia-Mishra, 2016	Drought stress adversely affects the growth and yield of wheat. The present study was planned to investigate the effect of inoculation of plant-growth promoting rhizobacte- ria (PGPR) strains IG 3 (Klebsiella sp.), IG 10 (Enterobacter ludwigii) and IG 15 (Flavobacterium sp.) in improving drought tolerance in wheat. These PGPR strains were screened for drought tolerance in nutrient broth supplemen…	Rejected	Proteomic study
ACC-deaminase' + ' gene expression' + 'drought stress' + 'plants' +'PGPR'	Google Scholar	Plant Growth-Promoting Rhizobacteria Enhance Salinity Stress Tolerance in Okra through ROS-Scavenging Enzymes	Habib et al., 2016	Salinity is a major environmental stress that limits crop production worldwide. In this study, we characterized plant growth- promoting rhizobacteria (PGPR) containing 1-aminocyclopropane-1-carboxylate (ACC) deaminase and examined their effect on salinity stress tolerance in okra through the induction of ROS-scavenging enzyme activity. PGPR inoculated okra plants exhibited higher germination perc…	Rejected	Proteomic study
ACC-deaminase' + ' gene expression' + 'drought stress' + 'plants' +'PGPR'	Google Scholar	Bacterial Biosynthesis of 1-Aminocyclopropane-1-Carboxylate (ACC) Deaminase and Indole-3-Acetic Acid (IAA) as Endophytic Preferential Selection Traits by Rice Plant Seedlings	Etesami et al.,2014	In this study, bacteria were isolated from the rhizosphere and inside the roots and nodules of berseem clover plants grown in the field in Iran. Two hundred isolates were obtained from the rhizosphere (120 isolates), interior roots (57 isolates), and nodules (23 isolates) of clover plants grown in rotation with rice plants. Production of chitinase, pectinase, cellulase, siderophore, salicylic aci…	Rejected	Proteomic study
ACC-deaminase' + ' gene expression' + 'drought stress' + 'plants' +'PGPR'	Google Scholar	Mitigation of drought stress in rice crop with plant growth‐promoting abiotic stress‐tolerant rice phyllosphere bacteria	Arun K. et al., 2020	In the search of effective drought‐alleviating and growth‐promoting phyllo- sphere bacteria, a total of 44 bacterial isolates were isolated from the leaf surface of drought‐tolerant rice varieties, Mattaikar, Nootripattu, Anna R(4), and PMK3, and screened for their abiotic stress tolerance by subjecting their growth medium to temperature, salinity, and osmotic stress. Only eight isolates were fou…	Rejected	Proteomic study
ACC-deaminase' + ' gene expression' + 'drought stress' + 'plants' +'PGPR'	Google Scholar	Isolation and characterization of ACC deaminase- producing fluorescent pseudomonads, to alleviate salinity stress on canola (Brassica napus L.) growth	Jalili et al., 2008	Salinity stress is of great importance in arid and semi-arid areas of the world due to its impact in reducing crop yield. Under salinity stress, the amount of 1-aminocyclopropane-1-carboxylate (ACC), a precursor for ethylene production in plants, increases. Here, we conducted research under the hypothesis that isolated ACC deaminase-producing Pseudomonas fluorescens and Pseudomonas putida can all…	Rejected	Proteomic study
ACC-deaminase' + ' gene expression' + 'drought stress' + 'plants' +'PGPR'	Google Scholar	Drought Stress Alleviation by ACC Deaminase Producing Achromobacter xylosoxidans and Enterobacter cloacae, with and without Timber Waste Biochar in Maize	Danish et al., 2020	The high consumption of water in industries, domestic areas and increasing earth temperature are major hurdles for the optimization of maize yield. Being the third most widely cultivated cereal crop, improvement in maize yield is a big challenge under the limited availability of irrigation. As the water requirement for maize cultivation is high, it is time to introduce technologies that can mitig…	Rejected	Proteomic study
ACC-deaminase' + ' gene expression' + 'drought stress' + 'plants' +'PGPR'	Google Scholar	ACC-deaminase producing plant growth promoting rhizobacteria and biochar mitigate adverse effects of drought stress on maize growth	Danish et al., 2020	Availability of good quality irrigation water is a big challenge in arid and semi arid regions of the world. Drought stress results in poor plant growth and low yield; however, the rhizobac- teria, capable of producing 1-aminocyclopropane-1-carboxylate (ACC)-deaminase are likely to improve crop growth and productivity under drought stress. Similarly, biochar could also ameliorate the negative imp…	Rejected	Proteomic study
ACC-deaminase' + ' gene expression' + 'drought stress' + 'plants' +'PGPR'	Google Scholar	Alleviation of salt stress response in soybean plants with the endophytic bacterial isolate Curtobacterium sp. SAK1	Khan et al., 2019	Background Salinity has been a major abiotic stressor that reduce the productivity. Previous studies reported that endophytic bacteria produce plant stress response hormones, antioxidants, and enzymes such as ACC deaminase. Augmentation of these metabolites and enzymes by endophytes mitigates the stress effects of salinity and improves plant growth and productivity. Methods Bacterial endophytes w…	Rejected	Proteomic study
ACC-deaminase' + ' gene expression' + 'drought stress' + 'plants' +'PGPR'	Google Scholar	Multifarious effect of ACC deaminase and EPS producing Pseudomonas sp. and Serratia marcescens to augment drought stress tolerance and nutrient status of wheat	Khan-Singh, 2021	Drought is the prime abiotic stress that rigorously influences plant growth, yield and quality of crops. The current investigation illustrated the bio-protective characters of Serratia marcescens and Pseudomonas sp. to ameliorate drought stress tolerance, plant growth and nutrient status of wheat. The present study aimed for search of potential drought tolerant plant growth-promoting rhizobacteri…	Rejected	Proteomic study
ACC-deaminase' + ' gene expression' + 'drought stress' + 'plants' +'PGPR'	Google Scholar	Regulation of Ethylene Level in Mungbean (Vigna radiata L.) by 1- Aminocyclopropane-1-Carboxylic Acid (ACC)-Deaminase containing Bacterial Strain under Salt Stress	Kumari et al., 2016	This study explored several features related to salt tolerance in mungbean plants through plant growth promoting bacteria (PGPB) Pseudomonas simiae strain AU. We report the significant effect of 1-aminocyclopropane- 1-carboxylate deaminase on the physical parameters and biomass content of Vigna radiata as compared control seedling under salt stress. Control (plants devoid of bacterial strains) an…	Rejected	Proteomic study
ACC-deaminase' + ' gene expression' + 'drought stress' + 'plants' +'PGPR'	Google Scholar	Induced drought tolerance through wild and mutant bacterial strain Pseudomonas simiae in mung bean (Vigna radiata L.)	Kumari et al.,2016	The present study focused on the overproducing mutant of a plant growth promoting rhizobacterium (PGPR) Pseudomonas simiae strain AU (MTCC-12057) for significant drought tolerance in mung bean plants. Five mutants namely AU-M1, AU-M2, AU-M3, AU-M4 and AU-M5 were made after treatment of wild type strain with N-methyl-N-nitro-N-nitrosoguanidine. Mutant strain AU- M4 was recorded for enhanced ACC de…	Rejected	Proteomic study
ACC-deaminase' + ' gene expression' + 'drought stress' + 'plants' +'PGPR'	Google Scholar	A novel PGPR strain Kocuria rhizophila Y1 enhances salt stress tolerance in T maize by regulating phytohormone levels, nutrient acquisition, redox potential, ion homeostasis, photosynthetic capacity and stress-responsive genes expression	Li et al., 2020	High salinity is harmful for crop physiology and yield. Accumulating evidences indicate that plant growth promoting rhizobacteria (PGPR) can enhance crop growth and reduce the negative impacts of salt stress through regulation of some molecular, biochemical and physiological features. In the present study, a novel halo-tolerant strain Y1 was isolated from maize rhizosphere soil. Sequence analysis…	Rejected	Proteomic study
ACC-deaminase' + ' gene expression' + 'drought stress' + 'plants' +'PGPR'	Google Scholar	Root colozing Burkholderia sp. AQ12 enhanced rice growth and upregulated tillering-responsive genes in rice	Maqsood et al., 2021	Association of 1-aminocyclo propane-1-carboxylate (ACC) deaminase producing bacteria with plants under abiotic stress conditions leads to stress alleviation not only by the regulation of ethylene concentration but also by the activation of numerous physiological and genetic mechanisms in plants. The objective of the current study was to evaluate the inoculation response of a plant-beneficial bact…	Rejected	No drought stress
ACC-deaminase' + ' gene expression' + 'drought stress' + 'plants' +'PGPR'	Google Scholar	Changes in volatiles in carrots inoculated with ACC deaminase-producing bacteria isolated from organic crops	Matsuoka et al.,2016	Aims Bacterial ACC deaminase is one of the key tools to ameliorate plant stress by lowering ethylene level in plants. The effects of ACC deaminase-producing bacteria on the volatile profiles in plants have not been examined to date. To address this, we performed meta- bolic profiling of volatiles in carrots following inoculation of the bacteria producing ACC deaminase. Methods We isolated ACC dea…	Rejected	No abiotic stress
ACC-deaminase' + ' gene expression' + 'drought stress' + 'plants' +'PGPR'	Google Scholar	Demonstrating the potential of abiotic stress-tolerant Jeotgalicoccus huakuii NBRI 13E for plant growth promotion and salt stress amelioration	Misra et al., 2019	The present study aimed to demonstrate the potential of abiotic stress-tolerant Jeotgalicoccus huakuii NBRI 13E for plant growth promotion and salt stress amelioration. NBRI 13E was characterized for abiotic stress tolerance and plant growth-promoting (PGP) attributes under normal and salt stress conditions. Phylogenetic comparison of NBRI 13E was carried out with known species of the same genera…	Rejected	Proteomic study
ACC-deaminase' + ' gene expression' + 'drought stress' + 'plants' +'PGPR'	Google Scholar	Regulation of IAA Biosynthesis in Azospirillum brasilense Under Environmental Stress Conditions	Molina et al.,2018	Indole-3-acetic acid (IAA) is one of the most important molecules produced by Azospirillum sp., given that it affects plant growth and development. Azospirillum brasilense strains Sp245 and Az39 (pFAJ64) were pre-incubated in MMAB medium plus 100 mg/mL l-tryptophan and treated with or exposed to the following (a) abiotic and (b) biotic stress effec- tors: (a) 100 mM NaCl or Na2SO4, 4.0% (w/v) PEG…	Rejected	Proteomic study
ACC-deaminase' + ' gene expression' + 'drought stress' + 'plants' +'PGPR'	Google Scholar	Disparate role of rhizobial ACC deaminase in root-nodule symbioses	Murset et al., 2012	The enzyme 1-aminocyclopropane-1-carboxylate (ACC) deaminase converts ACC, a precursor of the plant hormone ethylene, into ammonia and α-ketobutyrate. ACC deaminase is widespread among the rhizobia in which it might play a crucial role in protecting rhizobia against inhibitory effects of ethylene synthesized by the host plant in response to the nodulation process. The beneficial action of this en…	Rejected	No abiotic stress
ACC-deaminase' + ' gene expression' + 'drought stress' + 'plants' +'PGPR'	Google Scholar	Synergistic effect of ACC deaminase producing Pseudomonas sp. TR15a and siderophore producing Bacillus aerophilus TR15c for enhanced growth and copper accumulation in Helianthus annuus L	Kumar et al., 2021	Copper (Cu) is an essential element, however it’s excess into the environment causes detrimental effect on plant and risks for public health. Four Cu and drought tolerant 1-aminocyclopropane-1-carboxylate (ACC) deaminase producing rhizobacteria were isolated from the roots of Trifolium repens L. growing on Cu smelter contaminated soils, characterized and identified based on 16S rRNA gene sequenci…	Rejected	Proteomic study
ACC-deaminase' + ' gene expression' + 'drought stress' + 'plants' +'PGPR'	Google Scholar	ACC deaminase‐producing Ensifer adhaerens KS23 enhances proximate nutrient of Pisum sativum L. cultivated in high altitude	Katiyar et al.,2021	A phytohormone producing, N2-fixing and 1-aminocyclopropane-1-carboxylate (ACC) deaminase synthesizing bacterium Ensifer adhaerens KS23 effectively increased the yield and nutritional contents of Pisum sativum var. Arkel. The isolate KS23 showed positive ACC deaminase activity with 174.2 (nmol of α-ketobutyrate/g-1 biomass1⁄2 h−1) a 9.7-fold increase in glutathione S-transferase activity. The pro…	Rejected	No abiotic stress
ACC-deaminase' + ' gene expression' + 'drought stress' + 'plants' +'PGPR'	Google Scholar	Transcriptional responses of wheat roots inoculated with Arthrobacter nitroguajacolicus to salt stress	Safdarian et al., 2018	It is commonly accepted that bacteria actively interact with plant host and have beneficial effects on growth and adaptation and grant tolerance to various biotic and abiotic stresses. However, the mechanisms of plant growth promoting bacteria to communicate and adapt to the plant environment are not well characterized. Among the examined bacteria isolates from different saline soils, Arthrobacte…	Rejected	No acdS expression
ACC-deaminase' + ' gene expression' + 'drought stress' + 'plants' +'PGPR'	Google Scholar	Drought-Tolerant Plant Growth-Promoting Rhizobacteria Associated with Foxtail Millet in a Semi-arid Agroecosystem and Their Potential in Alleviating Drought Stress.	Niu et al., 2018	The application of plant growth promoting rhizobacteria (PGPR) to agro-ecosystems is considered to have the potential for improving plant growth in extreme environments featured by water shortage. Herein, we isolated bacterial strains from foxtail millet (Setaria italica L.), a drought-tolerant crop cultivated in semiarid regions in the northeast of China. Four isolates were initially selected fo…	Accepted
ACC-deaminase' + ' gene expression' + 'drought stress' + 'plants' +'PGPR'	Google Scholar	Molecular Identification of the Iranian Native ACC Research Article Deaminase Producing Rhizobacteria Using 16S rDNA	Ouzhand et al., 2016	One of the important mechanisms utilized by the plant growth promoting Rhizobacteria (PGPR) is lowering of ethylene levels by the 1-aminocyclopropane-1-carboxylic acid (ACC) deaminase enzyme. The mechanism facilitates plant growth and development in the stress conditions. PGPR containing ACC deaminase can pro- mote plant growth under stress and overcome the harmful effects. The study aimed to scr…	Rejected	No abiotic stress
ACC-deaminase' + ' gene expression' + 'drought stress' + 'plants' +'PGPR'	Google Scholar	Induced maize salt tolerance by rhizosphere inoculation of Bacillus amyloliquefaciens SQR9	Chen et al., 2016	Salt stress reduces plant growth and is now becoming one of the most important factors restricting agricultural productivity. Inoculation of plant growth-promoting rhizobacteria (PGPR) has been shown to confer plant tolerance against abiotic stress, but the detailed mechanisms of how this occurs remain unclear. In this study, hydroponic experiments indicated that the PGPR strain Bacillus amyloliq…	Rejected	Proteomic study
ACC-deaminase' + ' gene expression' + 'drought stress' + 'plants' +'PGPR'	Google Scholar	Promotion of Wheat Growth under Salt Stress by Halotolerant Bacteria Containing ACC deaminase	Pourbabaee et al., 2016	Salinity is a major abiotic stress that reduces crop productivity in arid and semiarid soils. About 25% of the country's arable land is affected by different levels of salt. A considerable part of this land is under wheat cultivation each year as the country's most important crop. ACC deaminase producing bacteria increase plant resistance to stress condition by reducing stress ethylene in a varie…	Rejected	No abiotic stress
ACC-deaminase' + ' gene expression' + 'drought stress' + 'plants' +'PGPR'	Google Scholar	Regulation of Drought-Responsive Gene Expression in Glycine max L. Merrill is Mediated Through Pseudomonas simiae Strain AU	Vaishnav-Choudhary, 2019	Plant growth promoting rhizobacteria (PGPR) have been described for sustainable agriculture practices as being a vital agent for abiotic and biotic stress mitigation and growth promotion in plants. In the present research, the authors emphasize the role of drought tolerant PGPR namely, Pseudomonas simiae strain AU, in protection of soybean plants by modulating the gene expression profile and phyt…	Rejected	Proteomic study
ACC-deaminase' + ' gene expression' + 'drought stress' + 'plants' +'PGPR'	Google Scholar	Alleviation of Salt Stress by Enterobacter sp. EJ01 in Tomato and Arabidopsis Is Accompanied by Up-Regulation of Conserved Salinity Responsive Factors in Plants	Kim et al., 2014	Microbiota in the niches of the rhizosphere zones can af- fect plant growth and responses to environmental stress conditions via mutualistic interactions with host plants. Specifically, some beneficial bacteria, collectively referred to as Plant Growth Promoting Rhizobacteria (PGPRs), in- crease plant biomass and innate immunity potential. Here, we report that Enterobacter sp. EJ01, a bacterium i…	Rejected	Proteomic study
ACC-deaminase' + ' gene expression' + 'drought stress' + 'plants' +'PGPR'	Google Scholar	Cadmium-induced ethylene production and responses in Arabidopsis thaliana rely on ACS2 and ACS6 gene expression	Schellingen et al., 2014	Background: Anthropogenic activities cause metal pollution worldwide. Plants can absorb and accumulate these metals through their root system, inducing stress as a result of excess metal concentrations inside the plant. Ethylene is a regulator of multiple plant processes, and is affected by many biotic and abiotic stresses. Increased ethylene levels have been observed after exposure to excess met…	Rejected	Proteomic study
ACC-deaminase' + ' gene expression' + 'drought stress' + 'plants' +'PGPR'	Google Scholar	Isolation and characterization of endophytic plant growth-promoting (PGPB) or stress homeostasis-regulating (PSHB) bacteria associated to the halophyte Prosopis strombulifera	Sgroy et al.,2009	This study was designed to isolate and charac- terize endophytic bacteria from halophyte Prosopis strom- bulifera grown under extreme salinity and to evaluate in vitro the bacterial mechanisms related to plant growth promotion or stress homeostasis regulation. Isolates obtained from P. strombulifera were compared genotypically by BOX-polymerase chain reaction, grouped according to similarity, and…	Rejected	Proteomic study
ACC-deaminase' + ' gene expression' + 'drought stress' + 'plants' +'PGPR'	Google Scholar	1-AMINOCYLOPROPANE-1-CARBOXYLATE (ACC)- DEAMINASE RHIZOBACTERIA EXTENUATES ACC-INDUCED CLASSICAL TRIPLE RESPONSE IN ETIOLATED PEA SEEDLINGS	Shaharoona et al., 2006	Ethylene is well thought-out stress hormone because its synthesis is induced by a variety of stresses. 1-Aminocyclopropane-1-carboxylate (ACC) is the immediate precursor of ethylene in higher plants. Some rhizobacteria can hydrolyze ACC into ammonia and α-ketobutyrate because of their ACC-deaminase activity. This study was conducted to investigate the influence of ACC- deaminase rhizobacteria on …	Rejected	Proteomic study
ACC-deaminase' + ' gene expression' + 'drought stress' + 'plants' +'PGPR'	Google Scholar	Drought response of Mucuna pruriens (L.) DC. inoculated with ACC deaminase and IAA producing rhizobacteria	Saleem et al., 2018	Drought is one of the major constraints limiting agricultural production worldwide and is expected to increase in the future. Limited water availability causes significant effects to plant growth and physiology. Plants have evolved different traits to mitigate the stress imposed by drought. The presence of plant growth-promoting rhizobacteria (PGPR) could play an important role in improving plant…	Rejected	Proteomic study
ACC-deaminase' + ' gene expression' + 'drought stress' + 'plants' +'PGPR'	Google Scholar	Drought response of Mucuna pruriens (L.) DC. inoculated with ACC deaminase and IAA producing rhizobacteria	Saleem et al., 2018		Rejected	Duplicate
ACC-deaminase' + ' gene expression' + 'drought stress' + 'plants' +'PGPR'	Google Scholar	A halotolerant Enterobacter sp. displaying ACC deaminase activity promotes rice seedling growth under salt stress	Sarkar et al., 2018	Agricultural productivity is proven to be hampered by the synthesis of reactive oxygen species (ROS) and production of stress-induced ethylene under salinity stress. One-aminocyclopropane-1-carboxylic acid (ACC) is the direct precursor of ethylene synthesized by plants. Bacteria possessing ACC deaminase activity can use ACC as a nitrogen source preventing ethylene production. Several salt-toleran…	Rejected	No drought stress
ACC-deaminase' + ' gene expression' + 'drought stress' + 'plants' +'PGPR'	Google Scholar	Enhancement of growth and salt tolerance of rice seedlings by ACC deaminase-producing Burkholderia sp. MTCC 12259	Sarkar et al., 2018	Increasing soil salinity is often associated with accelerated ethylene production in plants, leading to overall growth reduction. The salt-tolerant 1-aminocyclopropane-1-carboxylic acid (ACC) deaminase-producing PGPR may alleviate salt stress by reducing the production of stress ethylene. In this study, a salt-tolerant ACC dea- minase-producing strain named P50 was isolated from a coastal rice fi…	Rejected	Proteomic study
ACC-deaminase' + ' gene expression' + 'drought stress' + 'plants' +'PGPR'	Google Scholar	Volatile-Mediated Effects Predominate in Paraburkholderia phytofirmans Growth Promotion and Salt Stress Tolerance of Arabidopsis thaliana	Ledger et al., 2016	Abiotic stress has a growing impact on plant growth and agricultural activity worldwide. Specific plant growth promoting rhizobacteria have been reported to stimulate growth and tolerance to abiotic stress in plants, and molecular mechanisms like phytohormone synthesis and 1-aminocyclopropane-1-carboxylate deamination are usual candidates proposed to mediate these bacterial effects. Paraburkholde…	Rejected	No drought stress
ACC-deaminase' + ' gene expression' + 'drought stress' + 'plants' +'PGPR'	Google Scholar	Trichoderma parareesei Favors the Tolerance of Rapeseed (Brassica napus L.) to Salinity and Drought Due to a Chorismate Mutase	Poveda et al., 2020	Both drought and salinity represent the greatest plant abiotic stresses in crops. Increasing plant tolerance against these environmental conditions must be a key strategy in the development of future agriculture. The genus of Trichoderma filament fungi includes several species widely used as biocontrol agents for plant diseases but also some with the ability to increase plant tolerance against ab…	Rejected	Trichoderma
ACC-deaminase' + ' gene expression' + 'drought stress' + 'plants' +'PGPR'	Google Scholar	Isolation, Characterization, and Use for Plant Growth Promotion Under Salt Stress, of ACC Deaminase-Producing Halotolerant Bacteria Derived from Coastal Soil	Siddikee et al., 2010	In total, 140 halotolerant bacterial strains were isolated from both the soil of barren fields and the rhizosphere of six naturally growing halophytic plants in the vicinity of the Yellow Sea, near the city of Incheon in the Republic of Korea. All of these strains were characterized for multiple plant growth promoting traits, such as the production of indole acetic acid (IAA), nitrogen fixation, …	Rejected	Proteomic study
ACC-deaminase' + ' gene expression' + 'drought stress' + 'plants' +'PGPR'	Google Scholar	Bacterial community compositions of tomato (Lycopersicum esculentum Mill.) seeds and plant growth promoting activity of ACC deaminase producing Bacillus subtilis (HYT-12-1) on tomato seedlings	Xu et al.,2014	Study of endophytic bacteria within plant seeds is very essential and meaningful on account of their heri- tability and versatility. This study investigated Bacillus bacterial communities within the seeds of four commercial tomato varieties, by 16S rRNA gene PCR-RFLP (restric- tion fragment length polymorphism). Phylogenetic analysis of 16S rRNA gene sequences indicated that the 22 repre- sentati…	Rejected	Proteomic study
ACC-deaminase' + ' gene expression' + 'drought stress' + 'plants' +'PGPR'	Google Scholar	Microbiological Insights into the Stress-Alleviating Property of an Endophytic Bacillus altitudinis WR10 in Wheat under Low-Phosphorus and High-Salinity Stresses	Yue et al., 2019	An indole–3–acetic acid producing Bacillus altitudinis WR10 was previously isolated from the root of wheat (Triticum aestivum L.). In this study, the strain WR10 was used for relieving abiotic stresses in wheat under low phosphorus and high saline in hydroponic co-culture models. Significantly, strain WR10 improved wheat seed relative germination rate under salinity stress (200/400 mM NaCl) and t…	Rejected	Proteomic study
ACC-deaminase' + ' gene expression' + 'drought stress' + 'plants' +'PGPR'	Google Scholar	MITIGATION OF CADMIUM TOXICITY INDUCED STRESS IN WHEAT BY ACC-DEAMINASE CONTAINING PGPR ISOLATED FROM CADMIUM POLLUTED WHEAT RHIZOSPHERE	Zafar-Ul-Hye et. al, 2018	Heavy metals induced stress is a serious threat to crop productivity all over the world. Heavy metals enter the food chain through their uptake by plants and thereby affect human health. Among all the heavy metals, cadmium (Cd) is ubiquitously toxic due to its high water solubility. Cadmium can cause cancer, cardiovascular diseases and neural abnormalities in humans when taken up in the form of f…	Rejected	Proteomic study
ACC-deaminase' + ' gene expression' + 'drought stress' + 'plants' +'PGPR'	Google Scholar	Bacterial Distribution in the Rhizosphere of Wild Barley under Contrasting Microclimates	Timmusk et al., 2011	Background: All plants in nature harbor a diverse community of rhizosphere bacteria which can affect the plant growth. Our samples are isolated from the rhizosphere of wild barley Hordeum spontaneum at the Evolution Canyon (‘EC’), Israel. The bacteria which have been living in close relationship with the plant root under the stressful conditions over millennia are likely to have developed strateg…	Rejected	Proteomic study
ACC-deaminase' + ' gene expression' + 'drought stress' + 'plants' +'PGPR'	Google Scholar	Halophile plant growth-promoting rhizobacteria induce salt tolerance traits in wheat seedlings (Triticum aestivum L.)	Safdarian et al., 2020	Salinity is one of the most important growth-limiting factors for most crops in arid and semi-arid regions; however, the use of plant growth-promoting rhizobacteria isolated from saline soils could reduce the effects of saline stress in crops. This study aimed to evaluate the efficiency of plant growth-promoting rhizobacteria (PGPRs), isolated from the rhizosphere of halophile plants, for the gro…	Rejected	Proteomic study
ACC-deaminase' + ' gene expression' + 'drought stress' + 'plants' +'PGPR'	Google Scholar	Deciphering metal toxicity responses of flax (Linum usitatissimum L.) with T exopolysaccharide and ACC-deaminase producing bacteria in industrially contaminated soils	Zainab et al., 2020	Rapid industrialization is the main reason of heavy metals contamination of soil colloids and water reservoirs. Heavy metals are persistent inorganic pollutants; deleterious to plants, animals and human beings because of accumulation in food chain. The aim of the current work was to evaluate the role of indole acetic acid (IAA), exopolysaccharide (EPS) and ACC-deaminase producing plant growth pro…	Rejected	Proteomic study
ACC-deaminase' + ' gene expression' + 'drought stress' + 'plants' +'PGPR'	Google Scholar	EFFECT OF INOCULATION OF STRAINS WITH ACC DEAMINASE ISOLATED FROM VERMICOMPOST ON SEED GERMINATION AND SOME PHYSIOLOGICAL ATTRIBUTES IN MAIZE (ZEA MAYS L.) EXPOSED TO SALT STRESS	Zhou et al., 2019	Bacterial inoculation containing 1-aminocyclopropane-1-carboxylate (ACC) deaminase activity can induce stress tolerance in maize. Vermicompost is a rich source of growth promoting microbes, probably with a unique source for bacteria having ACC deaminase activity. The present investigation aimed to isolate strains with ACC deaminase activity from vermicompost and quantify their effects on seed ger…	Rejected	Proteomic study
ACC-deaminase' + ' gene expression' + 'drought stress' + 'plants' +'PGPR'	Google Scholar	Application of rice endophytic Bradyrhizobium strain SUTN9-2 containing modified ACC deaminase to rice cultivation under water deficit conditions	Sarapata et al., 2020	Bacterial 1-aminocyclopropane-1-carboxylate (ACC) deaminase is a key factor for alleviating the plant ethylene biosynthesis, which is induced by stress. The ACC deaminase-improved strains of the rice endophytic Bradyrhizobium sp. SUTN9-2, SUTN9-2 (ACCDadap) and SUTN9-2:pMG103::acdRS, exhibit 1.4- and 8.9-fold higher ACC deaminase activity than the wild type, respectively (Sarapat S, Songwattana P…	Rejected	Proteomic study
ACC-deaminase' + ' gene expression' + 'drought stress' + 'plants' +'PGPR'	Google Scholar	Volatile compounds from Alcaligenes faecalis JBCS1294 confer salt tolerance in Arabidopsis thaliana through the auxin and gibberellin pathways and differential modulation of gene expression in root and shoot tissues	Bhattacharyya et al.,2015	Volatile compounds from rhizobacteria are known to elicit and regulate plant growth and defense against various biotic and abiotic stresses. In the present study, we elucidated the biological role of volatiles from Alcaligenes faecalis strain JBCS1294 on the growth per- formance of Arabidopsis thaliana under salt stress. JBCS1294 volatiles promoted gains in fresh weight and shoot length of Arabid…	Rejected	Proteomic study
ACC-deaminase' + ' gene expression' + 'drought stress' + 'plants' +'PGPR'	Google Scholar	Serratia liquefaciens KM4 Improves Salt Stress Tolerance in Maize by Regulating Redox Potential, Ion Homeostasis, Leaf Gas Exchange and Stress-Related Gene Expression	El-Esawi et al., 2018	High salinity mitigates crop productivity and quality. Plant growth-promoting soil rhizobacteria (PGPR) improve plant growth and abiotic stress tolerance via mediating various physiological and molecular mechanisms. This study investigated the effects of the PGPR strain Serratia liquefaciens KM4 on the growth and physiological and molecular responsiveness of maize (Zea mays L.) plants under salin…	Rejected	Proteomic study
ACC-deaminase' + ' gene expression' + 'drought stress' + 'plants' +'PGPR'	Google Scholar	Streptomyces rochei SM3 Induces Stress Tolerance in Chickpea Against Sclerotinia sclerotiorum and NaCl	Srivastava et al., 2014	Understanding on actinomycetes-mediated stress tolerance in plants is very limited. This study demonstrated for the first time some stress toler- ance mechanisms in chickpea via mediation of an actinomycetes strain Streptomyces rochei SM3. Here, we used the strain SM3 for treating chickpea seeds and plants raised from such seeds were challenged with Sclerotinia sclerotiorum and NaCl. Chickpea mor…	Rejected	Actinomicete
ACC-deaminase' + ' gene expression' + 'drought stress' + 'plants' +'PGPR'	Google Scholar	Optimization of plant hormonal balance by microorganisms prevents plant T heavy metal accumulation	Ravanbakhsh et al., 2019	Heavy metal contamination is a threat to global food safety. Reducing heavy metal uptake in plants is a pro- mising way to make plants safer, yet breeding the right set of traits can be tedious. We test whether micro- organisms are able to impact the plant’s hormonal balance hereby helping to manage plant heavy metal uptake. We focus on ethylene, a plant hormone regulating plant stress tolerance …	Rejected	No drought stress
ACC-deaminase' + ' gene expression' + 'drought stress' + 'plants' +'PGPR'	Google Scholar	Rhizobacteria producing ACC deaminase mitigate water‐stress response in finger millet (Eleusine coracana (L.) Gaertn.)	Chandra et al.,2018		Rejected	Duplicate
ACC-deaminase' + ' gene expression' + 'drought stress' + 'plants' +'PGPR'	Google Scholar	Bio-inoculation of Plant Growth-promoting Rhizobacterium Enterobacter cloacae ZNP-3 Increased Resistance Against Salt and Temperature Stresses in Wheat Plant (Triticum aestivum L.)	Singh et al., 2017	Bacteria residing in the rhizosphere and capa- ble of host plant growth stimulation (PGPR) through ACC- deaminase activity can ameliorate various biotic- and abiotic-stress conditions by decreasing the level of ‘stress ethylene’ in plants. The present study aimed to evaluate the effect of a PGPR strain Enterobacter cloacae ZNP-3 in augmenting wheat plant growth under salinity- and temper- ature-s…	Rejected	Proteomic study
ACC-deaminase' + ' gene expression' + 'drought stress' + 'plants' +'PGPR'	Google Scholar	Appraising the potential of EPS-producing rhizobacteria with ACC-deaminase activity to improve growth and physiology of maize under drought stress	Nadeem et al., 2021	Rhizobacteria containing 1-aminocyclopropane-1-carboxylic acid- deaminase (ACC-deaminase) and exopolysaccharides (EPS) activity are important to induce stress tolerance in plants. The present study was con- ducted to screen and characterize plant growth-promoting rhizobacteria (PGPR) with ACC-deaminase and EPS-producing activity for improving maize growth under drought stress. Eighty-five rhizoba…	Rejected	Proteomic study
ACC-deaminase' + ' gene expression' + 'drought stress' + 'plants' +'PGPR'	Google Scholar	Alleviation of drought stress in mung bean by strain Pseudomonas aeruginosa GGRJ21	Sarma-Saikia, 2014	Backgrounds and aims Mung bean (Vigna radiata (L.) R. Wilczek), a widely cultivated pulse crops in India, experiences severe drought stress during the cultivation period. Apart from the conventional plant breeding and transgenic approaches, the application of plant growth- promoting rhizobacteria (PGPR) has always been a promising approach to improve abiotic stress tolerance in crop plants. The a…	Rejected	Proteomic study
ACC-deaminase' + ' gene expression' + 'drought stress' + 'plants' +'PGPR'	Google Scholar	Plant growth-promoting bacteria confer resistance in tomato plants to salt stress	Mayak et al., 2004	The object of the work is to evaluate whether rhizobacteria populating dry salty environments can increase resistance in tomato to salt stress. Seven strains of plant growth-promoting bacteria that have 1-aminocyclopropane-1-carboxylate (ACC) deaminase activity were isolated from soil samples taken from the Arava region of southern Israel. Following growth of these seedlings in the presence of 43…	Rejected	Proteomic study
ACC-deaminase' + ' gene expression' + 'drought stress' + 'plants' +'PGPR'	Google Scholar	Deciphering distinct biological control and growth promoting potential of multi-stress tolerant Bacillus subtilis PM32 for potato stem canker	Mehmood et al., 2021		Rejected	Biotic stress
ACC-deaminase' + ' gene expression' + 'drought stress' + 'plants' +'PGPR'	Google Scholar	Genotype-specific response of winter wheat (Triticum aestivum L.) to T irrigation and inoculation with ACC deaminase bacteria	Salem et al., 2018	Drought stress is a major factor limiting wheat production in rain-fed areas around the world. Wheat tolerance to drought stress may be enhanced through genotypic selection, but recently, there has been interest in manip- ulating wheat-microbial interactions to promote drought tolerance. The prime objective of the study was to examine the effects of inoculation with 1-aminocyclopropane-1-carboxyl…	Rejected	Proteomic study
ACC-deaminase' + ' gene expression' + 'drought stress' + 'plants' +'PGPR'	Google Scholar	Halotolerant plant-growth promoting rhizobacteria modulate gene expression and osmolyte production to improve salinity tolerance and growth in Capsicum annum L.	Yasin et al.,2018	Some rhizobacteria have demonstrated a noteworthy role in regulation of plant growth and biomass production under biotic and abiotic stresses. The present study was intended to explicate the ameliorative consequences of halotolerant plant growth- promoting rhizobacteria (HPGPR) on growth of capsicum plants subjected to salt stress. Salt stress was ascertained by supplementing 1 and 2 g NaCl kg−1 …	Rejected	Proteomic study
ACC-deaminase' + ' gene expression' + 'drought stress' + 'plants' +'PGPR'	Google Scholar	Deciphering distinct biological control and growth promoting potential of multi-stress tolerant Bacillus subtilis PM32 for potato stem canker	Mehmood et al., 2021		Rejected	Duplicate
ACC-deaminase' + ' gene expression' + 'drought stress' + 'plants' +'PGPR'	Google Scholar	Co-application of ACC-deaminase producing pGpR and timber- waste biochar improves pigments formation, growth and yield of wheat under drought stress	Danish et al., 2019	Besides other deleterious effects, drought elevates ethylene level too in plants. Increased ethylene concentration reduces root elongation and development that consequently retard plant growth and yield. There are certain PGPR which produce ACC-deaminase. The ACC-deaminase converts ACC (an immediate precursor of ethylene biosynthesis in methionine pathway in higher plants) into ammonia and α-keto…	Rejected	Proteomic study
ACC-deaminase' + ' gene expression' + 'drought stress' + 'plants' +'PGPR'	Google Scholar	Multi-stress tolerant PGPR Bacillus xiamenensis PM14 activating sugarcane (Saccharum officinarum L.) red rot disease resistance	Amna et al., 2020		Rejected	Biotic stress
ACC-deaminase' + ' gene expression' + 'drought stress' + 'plants' +'PGPR'	Google Scholar	Halotolerant Plant Growth‐Promoting Rhizobacteria Induce Salinity Tolerance in Wheat by Enhancing the Expression of SOS Genes	Haroon et al.,2021	Soil salinity is one of the main yield-limiting factors in various crops. Under different environmental stresses, many rhizo- bacteria have demonstrated encouraging role in enhancing plant growth and tolerate stress conditions. In this study, three potential 1-aminocyclopropane-1-carboxylic acid (ACC) deaminase- and exopolysaccharides (EPS)-secreting bacterial strains including Bacillus megateriu…	Rejected	Proteomic study
ACC-deaminase' + ' gene expression' + 'drought stress' + 'plants' +'PGPR'	Google Scholar	Pseudomonas azotoformans FAP5, a novel biofilm‐forming PGPR strain, alleviates drought stress in wheat plant	Ansari et al.,2021	Drought ranks among the most severe environmental stressors that adversely affect crop productivity. Use of stress-tolerant plant growth-promoting rhizobacteria (PGPR) is expected to ameliorate the drought stress in plants. Therefore, in this study, a novel strain, Pseudomonas azotoformans FAP5 with multifunctional traits was obtained from screening of 50 indigenous isolates. The criteria for sel…	Accepted
ACC-deaminase' + ' gene expression' + 'drought stress' + 'plants' +'PGPR'	Google Scholar	Regulation of Ethylene Emission in Tomato (Lycopersicon esculentum Mill.) and Red Pepper (Capsicum annuum L.) Inoculated with ACC Deaminase Producing Methylobacterium spp.	Yim et al., 2012	Improvement of plant growth by Methylotrophic bacteria can be influenced through alterations in growth modulating enzymes or hormones, especially by decreasing ethylene levels enzymatically by 1-aminocyclopropane- 1-carboxylate (ACC) deaminase or by production of indole-3-acetic acid (IAA). In this study, the effect of seven strains of Methylobacterium on seedling ethylene emission of tomato and …	Rejected	No abiotic stress
ACC-deaminase' + ' gene expression' + 'drought stress' + 'plants' +'PGPR'	Google Scholar	Bacterial-Mediated Induction of Systemic Tolerance to Salinity with Expression of Stress Alleviating Enzymes in Soybean (Glycine max L. Merrill)	Kumari et al., 2015	This study explored several features related to salt tolerance in soybean plants through plant growth-pro- moting rhizobacteria (PGPR; Pseudomonas sp. strain AK- 1, and Bacillus sp. strain SJ-5). We report the significant effect of 1-aminocyclopropane-1-carboxylate deaminase, indole-3-acetic acid production and exopolysaccharide production from both bacterial strains on physical pa- rameters and …	Rejected	Proteomic study
ACC-deaminase' + ' gene expression' + 'drought stress' + 'plants' +'PGPR'	Google Scholar	Effects Of The Transconjugant Pseudomonas Fluorescens Carrying 1-Aminocyclopropane-1-Carboxylate Deaminase Gene On Drought Tolerance Of Wheat	Mahmud et al., 2022	To increase drought tolerance of efficient plant growth promoting Pseudomonas fluorescens isolated from Iraq- Erbil Kurdistan soils, ACC-deaminase genes were transferred from Pseudomonas putida to P. fluorescens. ACC deaminase containing plant growth promoting rhizobacteria are capable to decrease ethylene inhibition of plant growth following a wide range of abiotic and biotic stresses. For P. fl…	Accepted
ACC-deaminase' + ' gene expression' + 'drought stress' + 'plants' +'PGPR'	Google Scholar	Screening and identification of abiotic stress-responsive efficient antifungal Pseudomonas spp. from rice rhizospheric soil	Karnwal et al., 2021	Plant growth-promoting rhizobacteria (PGPR) are a collection of microorganisms often used to support and promote plant development and combat plant infectious diseases with various biological control methods. The most significant restricting factors for agricultural productivity worldwide are abiotic constraints. In the present study, seven bacterial isolates from the rice rhizosphere were select…	Rejected	Proteomic study
ACC-deaminase' + ' gene expression' + 'drought stress' + 'plants' +'PGPR'	Google Scholar	Phytohormones (Auxin, Gibberellin) and ACC Deaminase In Vitro Synthesized by the Mycoparasitic Trichoderma DEMTkZ3A0 Strain and Changes in the Level of Auxin and Plant Resistance Markers in Wheat Seedlings Inoculated with this Strain Conidia	Jaroszuk- ́Sciseł et al., 2019	Both hormonal balance and plant growth may be shaped by microorganisms synthesizing phytohormones, regulating its synthesis in the plant and inducing plant resistance by releasing elicitors from cell walls (CW) by degrading enzymes (CWDE). It was shown that the Trichoderma DEMTkZ3A0 strain, isolated from a healthy rye rhizosphere, colonized the rhizoplane of wheat seedlings and root border cells …	Rejected	Trichoderma
ACC-deaminase' + ' gene expression' + 'drought stress' + 'plants' +'PGPR'	Google Scholar	Role of plant growth–promoting rhizobacterial consortium in improving the Vigna radiata growth and alleviation of aluminum and drought stresses	Silambarasan et al.,2019	Aluminum (Al) is a major constraint for plant growth by inducing inhibition of root elongation in acid soils around the world. Besides, drought is another major abiotic stress that adversely affects growth and productivity of agricultural crops. The plant growth–promoting (PGP) rhizobacterial strains are useful choice to decrease these stressful effects and is now extensively in practice. However…	Rejected	Proteomic study
ACC-deaminase' + ' gene expression' + 'drought stress' + 'plants' +'PGPR'	Google Scholar	Quantitative proteomics analysis reveals the tolerance of wheat to salt stress in response to Enterobacter cloacae SBP-8	Singh et al., 2017	Salinity stress adversely affects the plant growth and is a major constraint to agriculture. In the present study, we studied the role of plant growth promoting rhizobacterium (PGPR) Enterobacter cloacae SBP-8 possessing ACC deaminase activity on proteome profile of wheat (Triticum aestivum L.) under high salinity (200 mM NaCl) stress. The aim of study was to investigate the differential expresse…	Rejected	Proteomic study
ACC-deaminase' + ' gene expression' + 'drought stress' + 'plants' +'PGPR'	Google Scholar	Synergistic effect of Pseudomonas putida and Bacillus amyloliquefaciens ameliorates drought stress in chickpea (Cicer arietinum L.)	Kumar, et al., 2016	Two plant growth promoting rhizobacteria (PGPR) Pseudomonas putida NBRIRA and Bacillus amyloliquefaciens NBRISN13 with ability to tolerate abiotic stress along with multiple PGP traits like ACC deaminase activity, minerals solubilisation, hormones production, biofilm formation, siderophore activity were evaluated for their synergistic effect to ameliorate drought stress in chickpea. Earlier we ha…	Rejected	Proteomic study
ACC-deaminase' + ' gene expression' + 'drought stress' + 'plants' +'PGPR'	Google Scholar	Evaluation of PGPR strains having ACC deaminase activity for their efficacy to induce water stress tolerance in sunflower under varied moisture regimes	Siddique et al. 2019	Sunflower is an important oil seed crop in Pakistan but incidence of drought stress considerably hampers its growth and productivity. The present pot study was performed to evaluate the potential of PGPR strains having ACC deaminase activity for their efficacy to induce water stress tolerance in sunflower. Ten PGPR strains (KS7, KS8, KS10, KS15, KS17, KS25, KS28, KS41, KS42 and KS44) already isol…	Rejected	Proteomic study
ACC-deaminase' + ' gene expression' + 'drought stress' + 'plants' +'PGPR'	Google Scholar	Compost mixed fruits and vegetable waste biochar with ACC deaminase rhizobacteria can minimize lead stress in mint plants	Zafar‑ul‑Hye et al., 2021	High lead (Pb) concentration in soils is becoming a severe threat to human health. It also deteriorates plants, growth, yield and quality of food. Although the use of plant growth‐promoting rhizobacteria (PGPR), biochar and compost can be effective environment‐friendly amendments for decreasing Pb stress in crop plants, the impacts of their simultaneous co‐application has not been well documented…	Rejected	Proteomic study
ACC-deaminase' + ' gene expression' + 'drought stress' + 'plants' +'PGPR'	Google Scholar	ACC Deaminase Producing PGPR Bacillus amyloliquefaciens and Agrobacterium fabrum along with Biochar Improve Wheat Productivity under Drought Stress	Zafar-ul-Hye et al., 2019	Drought stress retards wheat plant’s vegetative growth and physiological processes and results in low productivity. A stressed plant synthesizes ethylene which inhibits root elongation; however, the enzyme 1-Aminocyclopropane-1-Carboxylate (ACC) deaminase catabolizes ethylene produced under water stress. Therefore, the ACC deaminase producing plant growth promoting rhizobacteria (PGPR) can be use…	Rejected	Proteomic study
ACC-deaminase' + ' gene expression' + 'drought stress' + 'plants' +'PGPR'	Google Scholar	Isolation and characterization of ACC Deaminase Producing Endophytic Bacillus mojavensis PRN2 from Pisum sativum	Maheshwari et al., 2020	Endophytic bacteria reside inside healthy plant tissues and provide several benefits to their host, and help them to tolerate various stresses. Aminocyclopropane-1-carboxylate deaminase (ACCD) production is one of the mechanisms by which these bacteria help the plant to survive under ethylene stress. Objectives: The main focus of this study was to isolate endophytic bacteria and effectively scree…	Rejected	No abiotic stress
ACC-deaminase' + ' gene expression' + 'drought stress' + 'plants' +'PGPR'	Google Scholar	Biotechnological approaches in agriculture and environmental management - bacterium Kocuria rhizophila 14ASP as heavy metal and salt- tolerant plant growth- promoting strain	Afridi et al.,2021	Plant growth-promoting bacteria (PGPB), possess multifarious beneficial traits and facilitate plant growth by both direct and indirect mechanisms under hostile conditions. The objective of the current study was to evaluate the potential application of 1- aminocyclopropane-1-carboxylate deaminase (ACC deaminase) producing plant-growth promoting endophyte bacterium (PGPEB) Kocuria rhizophila strain…	Rejected	Proteomic study
ACC-deaminase' + ' gene expression' + 'drought stress' + 'plants' +'PGPR'	Google Scholar	Alleviation of Salt Stress in Wheat Seedlings via Multifunctional Bacillus aryabhattai PM34: An In-Vitro Study	Mehmood et al., 2021	Plant growth-promoting rhizobacteria play a substantial role in plant growth and devel- opment under biotic and abiotic stress conditions. However, understanding about the functional role of rhizobacterial strains for wheat growth under salt stress remains largely unknown. Here we investigated the antagonistic bacterial strain Bacillus aryabhattai PM34 inhabiting ACC deaminase and exopolysacchari…	Accepted
ACC-deaminase' + ' gene expression' + 'drought stress' + 'plants' +'PGPR'	Google Scholar	Metagenomic analysis of the 1-aminocyclopropane-1-carboxylate deaminase gene (acdS) operon of an uncultured bacterial endophyte colonizing Solanum tuberosum L	Nikolic et al.,2011	Deamination of the ethylene precursor 1-ami- nocyclopropane-1-carboxylic acid (ACC) is a key plant- beneficial trait found in many plant growth-promoting bacteria. In this study, we analysed ACC deaminase genes (acdS) of bacterial endophytes colonizing field-grown potato plants. PCR analysis revealed the presence of two types of acdS genes, the dominant one showing high homology to an acdS gene d…	Rejected	No abiotic stress
ACC-deaminase' + ' gene expression' + 'drought stress' + 'plants' +'PGPR'	Google Scholar	Isolation and characterization of 1-aminocyclopropane- 1-carboxylate (ACC) deaminase-containing plant growth-promoting rhizobacteria from carnation soil and roots	Haiquan et al., 2013	Five strains of plant growth-promoting rhizobacteria (PGPR) with 1-aminocyclopropane-1-carboxylate (ACC) deaminase activity were isolated from carnation soil and roots using ACC as the sole nitrogen source. Based on their growth morphological, microscopic cell properties and 16S rRNA sequence analysis, the results showed that three strains were identified as Enterobacter section and one as Erwini…	Rejected	Proteomic study
ACC-deaminase' + ' gene expression' + 'drought stress' + 'plants' +'PGPR'	Google Scholar	Screening and characterisation of ACC deaminase producing rhizobacteria from root nodules of clusterbean (Cyamopsis tetragonoloba)	Dhull et al., 2018	Clusterbean plants are suffered with poor nodulation and nitrogen fixation due to ethylene concentration in the root zone. Plant growth-promoting rhizobacteria (PGPR) can help overcome these detrimental effects. Recently, rhizobacteria containing ACC (1-aminocyclopropane-1-carboxylate) deaminases have been found to enhance nodulation and plant growth in various legumes by lowering the levels of e…	Rejected	No abiotic stress
ACC-deaminase' + ' gene expression' + 'drought stress' + 'plants' +'PGPR'	Google Scholar	Drought-Tolerance of Wheat Improved by Rhizosphere Bacteria from Harsh Environments: Enhanced Biomass Production and Reduced Emissions of Stress Volatiles	Timmusk et al., 2014	Water is the key resource limiting world agricultural production. Although an impressive number of research reports have been published on plant drought tolerance enhancement via genetic modifications during the last few years, progress has been slower than expected. We suggest a feasible alternative strategy by application of rhizospheric bacteria coevolved with plant roots in harsh environments…	Rejected	Proteomic study
ACC-deaminase' + ' gene expression' + 'drought stress' + 'plants' +'PGPR'	Google Scholar	Alleviation of Drought Stress and Plant Growth Promotion by Pseudomonas libanensis EU-LWNA-33, a Drought-Adaptive Phosphorus-Solubilizing Bacterium	Kour et al.,2020	Drought is a very common abiotic stress worldwide in arid and semiarid areas. It decreases the growth and yield of the crops. Due to drought stress, there is insufficient intake of the nutrients, the low rate of pho- tosynthesis and limited supply of water in plants. Inocu- lating crops with plant growth-promoting rhizobacteria (PGPR) mitigates the deleterious effects of stress by pro- moting ben…	Rejected	Proteomic study
ACC-deaminase' + ' gene expression' + 'drought stress' + 'plants' +'PGPR'	Google Scholar	Heavy metal induced oxidative damage and root morphology alterations of maize (Zea mays L.) plants and stress mitigation by metal tolerant nitrogen fixing Azotobacter chroococcum	Rizvi et al., 2018	Heavy metals are one of the major abiotic stresses that adversely affect the quantity and nutritive value of maize. Microbial management involving the use of plant growth promoting rhizobacteria (PGPR) is a promising in- expensive strategy for metal clean up from polluted soils. Considering these, metal tolerant plant growth pro- moting nitrogen fixing rhizobacterial strain CAZ3 identified by 16S…	Rejected	No acdS expression
ACC-deaminase' + ' gene expression' + 'drought stress' + 'plants' +'PGPR'	Google Scholar	Plant–Agrobacterium interaction mediated by ethylene and super-Agrobacterium conferring efficient gene transfer	Nonaka et al., 2014	Agrobacterium tumefaciens has a unique ability to transfer genes into plant genomes. This ability has been utilized for plant genetic engineering. However, the efficiency is not sufficient for all plant species. Several studies have shown that ethylene decreased the Agrobacterium-mediated transformation frequency. Thus, A. tumefaciens with an ability to suppress ethylene evolution would increase …	Rejected	No abiotic stress
ACC-deaminase' + ' gene expression' + 'drought stress' + 'plants' +'PGPR'	Google Scholar	A Halotolerant Bacterium Bacillus licheniformis HSW-16 Augments Induced Systemic Tolerance to Salt Stress in Wheat Plant (Triticum aestivum)	Singh et al., 2016	Certain plant growth promoting bacteria can protect associated plants from harmful effects of salinity. We report the isolation and characterization of 1-aminocyclopropane- 1-carboxylic acid (ACC) deaminase bacterium Bacillus licheniformis HSW-16 capable of ameliorating salt (NaCl) stress in wheat plants. The bacterium was isolated from the water of Sambhar salt lake, Rajasthan, India. The presen…	Rejected	No drought stress
ACC-deaminase' + ' gene expression' + 'drought stress' + 'plants' +'PGPR'	Google Scholar	Streptomyces sp. strain PGPA39 alleviates salt stress and promotes growth of ‘Micro Tom’ tomato plants	Palaniyandi et al., 2014	Aims: To identify an actinobacterial strain that can promote growth and alleviate salinity stress in tomato plants. Methods and Results: Actinobacteria were isolated from agricultural soil and screened for ACC deaminase activity, production of indole acetic acid (IAA), solubilization of tricalcium phosphate and sodium chloride (NaCl) salinity tolerance. Among the several strains tested, one strai…	Rejected	Streptomyces
ACC-deaminase' + ' gene expression' + 'drought stress' + 'plants' +'PGPR'	Google Scholar	Seed inoculation of desert-plant growth-promoting rhizobacteria induce biochemical alterations and develop resistance against water stress in wheat	Zia et al., 2021	Water shortage limits agricultural productivity, so strategies to get higher yields in dry agricultural systems is vital to circumvent the effect of climate change and land- shortage. The plant rhizosphere harbors beneficial bacteria able to confer biotic/abiotic tolerance along with a positive impact on plant growth. Herein, three bacterial strains, Proteus mirabilis R2, Pseudomonas balearica RF…	Rejected	Proteomic study
ACC-deaminase' + ' gene expression' + 'drought stress' + 'plants' +'PGPR'	Google Scholar	Molecular interaction of 1-aminocyclopropane-1- carboxylate deaminase (ACCD)- producing endophytic Streptomyces sp. GMKU 336 towards salt-stress resistance of Oryza sativa L. cv. KDML105	Jaemsaeng et al., 2018	1-aminocyclopropane-1-carboxylate deaminase (ACCD)-producing endophytic Streptomyces sp. GMKU 336 and its ACCD-deficient mutant were inoculated into Thai jasmine rice Khao Dok Mali 105 cultivar (Oryza sativa L. cv. KDML105) under salt stress (150 mM NaCl) conditions. The results clearly indicated that Streptomyces sp. GMKU 336 significantly increased plant growth, chlorophyll, proline, K+, Ca+, a…	Rejected	No drought stress
ACC-deaminase' + ' gene expression' + 'drought stress' + 'plants' +'PGPR'	Google Scholar	Functional and phylogenetic diversity of cultivable rhizobacterial endophytes of sorghum [Sorghum bicolor (L.) Moench]	Govindasamy et al.,2017	A diverse group of bacteria colonize the exo- and endo-rhizospheres of sorghum and play a critical role in its tolerance to drought and other abiotic stresses. Two hundred and eighty endophytic bacteria were isolated from the surface-sterilized roots of four sorghum cultivars that were grown on three soil types at three different phenological stages of growth. The isolates were subjected to in vi…	Rejected	Proteomic study
ACC-deaminase' + ' gene expression' + 'drought stress' + 'plants' +'PGPR'	Google Scholar	Bacterial ACC Deaminase Activity in Promoting Plant Growth on Areas Contaminated with Heavy Metals	Grobelak et al., 2018	The objective of this study was to explore the possible improvement of plant growth using the activity of the bacterial enzyme ACC (1-aminocyclopropane-1-carboxylate) deaminase (endophytes and rhizobacteria). The beneficial effect of ACC deaminase activity was tested on the plants growing under stress conditions (high concentrations of heavy metals: cadmium, lead, zinc in the soil). The bacteria …	Rejected	Proteomic study
ACC-deaminase' + ' gene expression' + 'drought stress' + 'plants' +'PGPR'	Google Scholar	Alleviation of chromium toxicity in maize by Fe fortification and chromium tolerant ACC deaminase producing plant growth promoting rhizobacteria	Danish et al., 2019	Chromium (Cr) is becoming a potential pollutant with the passage of time. Higher intake of Cr does not only affect the productivity of crops, but also the quality of food produced in Cr polluted soils. In the past, foliar application of Fe is widely studied regarding their potential to alleviate Cr toxicity. However, limited in- formation is documented regarding the combined use of PGPR and folia…	Rejected	Proteomic study
ACC-deaminase' + ' gene expression' + 'drought stress' + 'plants' +'PGPR'	Google Scholar	Plant Growth Promoting Traits of Firmibacteria under Drought Stress	Devi et al., 2018	Abrupt climate and unavailability of required water supply could majorly affect the productivity of agriculturally important crops which could be mitigated using plant growth traits. In this context this study was aimed to evaluate the plant growth promoting traits of firmibacteria under drought stress. Forty four firmibacteria were taken to evaluate their growth in different concentrations of po…	Rejected	Proteomic study
ACC-deaminase' + ' gene expression' + 'drought stress' + 'plants' +'PGPR'	Google Scholar	Induction of moisture stress tolerance by Bacillus and Paenibacillus in pigeon pea (Cajanus cajan. L)	Devi et al., 2021	Drought stress is the main growth-limiting factor in pigeon pea production. Plant growth-promoting bacteria (PGPB) induce abiotic stress tolerance in several plants. However, the physiological and molecular changes with PGPB priming are not well understood in pigeon pea. The present study explored the potential of Firmibacteria (Bacillus azotoformans MTCC2953, Bacillus aryabhattai KSBN2K7, and Pa…	Rejected	Proteomic study
ACC-deaminase' + ' gene expression' + 'drought stress' + 'plants' +'PGPR'	Google Scholar	Disruption of acdS gene reduces plant growth promotion activity and maize saline stress resistance by Rahnella aquatilis HX2	Peng et al., 2018	Rahnella aquatilis HX2 was isolated from Beijing vineyard soil and used as a plant growth-promoting rhizobacterium in the field. Previous studies have shown that it has a broad in vitro antimicrobial spectrum and could inhibit a variety of plant pathogenic bacteria and fungi. In this study, a gene, acdS, encoding 1-aminocyclopropane-1- carboxylic acid-deaminase was disrupted by in-frame deletion …	Rejected	No drought stress
ACC-deaminase' + ' gene expression' + 'drought stress' + 'plants' +'PGPR'	Google Scholar	Phylogenetically diverse endophytic bacteria from desert plants induce transcriptional changes of tissue-specific ion transporters and salinity stress in Arabidopsis thaliana	Eida et al., 2019	Salinity severely hampers crop productivity worldwide and plant growth promoting bacteria could serve as a sustainable solution to improve plant growth under salt stress. However, the molecular mechanisms underlying salt stress tolerance promotion by beneficial bacteria remain unclear. In this work, six bacterial isolates from four different desert plant species were screened for their biochemica…	Rejected	Proteomic study
ACC-deaminase' + ' gene expression' + 'drought stress' + 'plants' +'PGPR'	Google Scholar	Genotype-Specific Enrichment of 1-Aminocyclopropane- 1-Carboxylic Acid Deaminase-Positive Bacteria in Winter Wheat Rhizospheres	Stromberger et al., 2017	Bacteria that produce 1-aminocyclopropane-1-carboxylic acid (ACC) deaminase can promote plant growth under abiotic stress by lowering stress ethylene levels through deamination of ACC, the immediate precursor of ethylene. Unfortunately, little is known regarding the natural abundance and diversity of ACC deaminase-positive (ACC+) bacteria in soils or how ACC+ bacteria are influenced by plant geno…	Accepted
ACC-deaminase' + ' gene expression' + 'drought stress' + 'plants' +'PGPR'	Google Scholar	Influence of Pseudomonas aeruginosa as PGPR on oxidative stress tolerance in wheat under Zn stress	Islam et al., 2014	Plant Growth Promoting Rhizobacteria (PGPR), whose role is still underestimated, plays an important (or perhaps essential) role in improving plant growth. The comprehensive understanding of bacterial plant growth promoting mechanism helps to get sustainable agriculture production under biotic and abiotic stresses. In the present study, plant growth promoting (PGP) bacterial strain Pseudomonas aer…	Rejected	Proteomic study
ACC-deaminase' + ' gene expression' + 'drought stress' + 'plants' +'PGPR'	Google Scholar	Plant growth promoting bacteria confer salt tolerance in Vigna radiata by up-regulating antioxidant defense and biological soil fertility	Islam et al.,2016	Salinity, a frequently occurring abiotic stress, is a major constraint for crop productivity worldwide. The present study was conducted to evaluate the ability of plant growth promoting rhizobacteria (PGPR) Bacillus cereus Pb25, isolated from soil irrigated with saline water, to promote Vigna radiate (mungbean) growth in the absence and presence of salt stress (9 dS m-1). Results demon- strated t…	Rejected	Proteomic study
ACC-deaminase' + ' gene expression' + 'drought stress' + 'plants' +'PGPR'	Google Scholar	Biochemical Characterization and Potential of Bacillus safensis Strain SCAL1 to Mitigate Heat Stress in Solanum lycopersicum L.	Mukhtar et al.,2022	Endophytic microbes promote plant growth through various biochemical mechanisms and assist plants in resuming their morpho-physiological traits under abiotic stresses. The current study was conducted to investigate the plant growth promotion properties and biochemical characterization of Bacillus safensis (SCAL1) under various heat stress regimes. Further investi- gations aimed to understand the …	Rejected	Proteomic study
ACC-deaminase' + ' gene expression' + 'drought stress' + 'plants' +'PGPR'	Google Scholar	Evaluation of the production of exopolysaccharide by plant growth promoting yeast Rhodotorula sp. strain CAH2 under abiotic stress conditions	Silambarasan et al., 2019	The capability of plant growth promoting microbes to survive under abiotic stresses has important significance for improving plant growth and productivity. Among the various plant growth promoting biomolecules produced by microbes, exopolysaccharide (EPS) help microbes to survive in inhospitable environments and endure environmental stressful conditions. In the present study, a yeast strain CAH2 …	Rejected	Proteomic study
ACC-deaminase' + ' gene expression' + 'drought stress' + 'plants' +'PGPR'	Google Scholar	Enhanced Drought and Salt Stress Tolerance in Arabidopsis by Flavobacterium crocinum HYN0056T	Kim et al.,2020	Plant growth-promoting bacteria (PGPB) are indigenous to the plant rhizosphere and largely affect many events occur- ring during the plant life cycle, through either a direct or an indirect mechanism such as regulation of hormonal balance, facilitation of nutrients uptake and improvement of stress tolerance. Since drought stress, a representative abiotic stress, is one of the main reasons limitin…	Rejected	Proteomic study
ACC-deaminase' + ' gene expression' + 'drought stress' + 'plants' +'PGPR'	Google Scholar	In vitro screening for salinity and drought stress tolerance in plant growth promoting bacterial strains	Kumari et al., 2016	The present study was designed to elevate the in vitro bacterial mechanisms related to the plant growth promotion and their tolerance for sodium chloride (NaCl) and polyethylene glycol (PEG) in culture media. Total nine bacterial strains were studied for both stress tolerance under varying concentration of NaCl and PEG. Out of them, three bacterial strains namely Pseudomonas simiae AU, P. koreens…	Rejected	Proteomic study
ACC-deaminase' + ' gene expression' + 'drought stress' + 'plants' +'PGPR'	Google Scholar	Mitigation of drought in rice by a phyllosphere bacterium Bacillus altitudinis FD48	Kumar et al., 2017	Phyllosphere bacteria plays important role in mitigating biotic and abiotic stress. This study aimed to use phyllosphere bacterium of rice to enhance drought tolerance. Bacterial isolates obtained from rice phyllosphere were investigated for their plant growth promoting activities and role in alleviation of drought stress in rice. The isolates were identified as Bacillus altitudinis FD48, Bacillu…	Accepted
ACC-deaminase' + ' gene expression' + 'drought stress' + 'plants' +'PGPR'	Google Scholar	Identification of plant growth-promoting bacteria-responsive proteins in cucumber roots under hypoxic stress using a proteomic approach	Li et al., 2013	Plant growth-promoting bacteria (PGPB) can both facilitate plant growth and improve plant resistance to a variety of environmental stresses. In order to investigate the mechanisms that PGPB use to protect plants under hypoxic conditions, the protein profiles of stressed and non-stressed cucumber roots, either treated or not treated with PGPB, were examined. Two dimensional difference in-gel elect…	Rejected	Proteomic study
ACC-deaminase' + ' gene expression' + 'drought stress' + 'plants' +'PGPR'	Google Scholar	Effectiveness of Various Pseudomonas spp. And Burkholderia caryophylli Containing ACC-Deaminase for Improving Growth and Yield of Wheat (Triticum aestivum L.)	Shaharoona et al., 2007		Rejected	Proteomic study
ACC-deaminase' + ' gene expression' + 'drought stress' + 'plants' +'PGPR'	Google Scholar	Drought-tolerant Pseudomonas sp. showed differential expression of stress-responsive genes and induced drought tolerance in Arabidopsis thaliana	Yasmin et al., 2022	The growth and persistence of rhizobacteria in soils are highly impacted by moisture stress. In this study, we report the first transcript analysis of four Pseudomonas strains (PS1, PS2, PS3, and PS4) isolated from the root-soil interface of rice and maize asso- ciated with different moisture levels during water deprivation. Filtered Pseudomonas sp. cells incubated at low (RH10%) and high (RH85%)…	Rejected	No acdS expression
ACC-deaminase' + ' gene expression' + 'drought stress' + 'plants' +'PGPR'	Google Scholar	Structural heterogeneity assessment among the isoforms of fungal 1-aminocyclopropane-1-carboxylic acid (ACC) deaminase: a comparative in silico perspective	Pramanik et al., 2022	Background: The primary amino acid sequence of a protein is a translated version from its gene sequence which carries important messages and information concealed therein. The present study unveils the structure-function and evolutionary aspects of 1-aminocyclopropane-1-carboxylic acid deaminase (ACCD) proteins of fungal origin. ACCD, an important plant growth-promoting microbial enzyme, is less …	Rejected	Fungal
ACC-deaminase' + ' gene expression' + 'drought stress' + 'plants' +'PGPR'	Google Scholar	1-Aminocyclopropane-1-carboxylic acid deaminase producing beneficial rhizobacteria ameliorate the biomass characters of Panicum maximum Jacq. by mitigating drought and salt stress	Tiwari et al., 2018	1-Aminocyclopropane-1-carboxylic acid (ACC) is a precursor molecule of ethylene whose concentration is elevated in the plant subjected to biotic and abiotic stress. Several soil microorganisms are reported to produce ACC deaminase (ACCd) which degrades ACC thereby reducing stress ethylene in host plants. This study is aimed to apply ACCd producing beneficial rhizobacteria to improve biochemical p…	Rejected	Proteomic study
ACC-deaminase' + ' gene expression' + 'drought stress' + 'plants' +'PGPR'	Google Scholar	Expression on roots and contribution to maize phytostimulation of 1-aminocyclopropane-1-decarboxylate deaminase gene acdS in Pseudomonas fluorescens F113	Vacheron et al.,2016	Aims The plant-beneficial bacterium Pseudomonas fluorescens F113 harbours an acdS gene, which enables deamination of 1-aminocyclopropane-1-carboxylate. The impact of abiotic and biotic factors on the expression of this gene was assessed, as well as the plant-beneficial properties of F113 under different soil moistures.Methods An acdS-egfp biosensor was constructed in F113, validated in vitro and …	Rejected	No abiotic stress
ACC-deaminase' + ' gene expression' + 'drought stress' + 'plants' +'PGPR'	Google Scholar	PRELIMINARY INVESTIGATIONS ON SELECTION OF SYNERGISTIC HALOTOLERANT PLANT GROWTH PROMOTING RHIZOBACTERIA FOR INDUCING SALINITY TOLERANCE IN WHEAT	KHAN et al., 2017	Halotolerant bacteria having 1-aminocyclopropane-1-carboxylate (ACC)-deaminase activity were isolated from wheat rhizosphere and further screened for their plant growth promoting potentials in planta by using wheat as test crop under salinity stress. ACC-deaminase activity ranged from 85 to 399 nmol α-ketobutyrate mg-1 hr-1 of these rhizobacteria. In absence of L-tryptophan, out of 25 rhizobacter…	Rejected	Proteomic study
ACC-deaminase' + ' gene expression' + 'drought stress' + 'plants' +'PGPR'	Google Scholar	Plant growth promoting Curtobacterium albidum strain SRV4: An T agriculturally important microbe to alleviate salinity stress in paddy plants	Vimal et al., 2019	Present study examined the inoculation of halo-tolerant plant-growth-promoting-rhizobacteria (PGPR) on paddy plant growth parameters and physiology under different salinity (0, 100, 200 and 300 mM) conditions. Twenty- nine promising halo-tolerant PGPRs were isolated and screened for their PGP traits from the rhizosphere of naturally growing plants of saline soils located at Sandila region of Hard…	Rejected	Proteomic study
ACC-deaminase' + ' gene expression' + 'drought stress' + 'plants' +'PGPR'	Google Scholar	Characterization of abiotic stress tolerant Pseudomonas spp. occurring in Indian soils	ASHWITHA et al., 2013	Abiotic stress tolerance of 230 Pseudomonas spp. occurring in Indian soils was evaluated for tolerance to temperature, salinity and moisture stresses. Forty seven Pseudomonas spp. were characterized as abiotic stress tolerant and were identified as P. aeruginosa (24), P. putida (14), P. plecoglossicida (4), P. mosselli (1), Pseudomonas sp. (1) and P. fluorescens (3). The temperature and salinity …	Rejected	No acdS expression
ACC-deaminase' + ' gene expression' + 'drought stress' + 'plants' +'PGPR'	Google Scholar	Inoculation of Brevibacterium linens RS16 in Oryza sativa genotypes enhanced salinity resistance: Impacts on photosynthetic traits and foliar volatile emissions	Chatterjee et al., 2018	The emission of volatiles in response to salt stress in rice cultivars has not been studied much to date. Studies addressing the regulation of stress induced volatile emission by halotolerant plant growth promoting bacteria containing ACC (1-aminocyclopropane-1-carboxylate) deaminase are also limited. The objective of the present study was to investigate the salt alleviation potential of bacteria…	Rejected	Proteomic study
ACC-deaminase' + ' gene expression' + 'drought stress' + 'plants' +'PGPR'	Google Scholar	Soil microbiomes vary in their ability to confer drought tolerance to Arabidopsis	Zolla et al., 2013	Drought is a major constraint on agricultural production. Crop genetic improvement for drought tolerance has received much attention and there is ample information about the ability of specific soil microbes to influence drought tolerance in plants. However, in nature, plants interact simultaneously with an array of beneficial, benign and pathogenic microbes. There is a need to understand the cum…	Rejected	No acdS expression
ACC-deaminase' + ' gene expression' + 'drought stress' + 'plants' +'PGPR'	Google Scholar	Isolation and characterization of new plant growth-promoting bacterial endophytes	Rashid et al., 2012	Those bacterial endophytes that also provide some benefit to plants may be considered to be plant growth- promoting bacteria (PGPB) and can facilitate plant growth by a number of different mechanisms. In the work that is reported here, soil samples from several locales around the world were used as a starting point for the isolation of new endophytes. Subsequently, those newly isolated endophytes…	Rejected	Proteomic study
ACC-deaminase' + ' gene expression' + 'drought stress' + 'plants' +'PGPR'	Google Scholar	Interaction of the novel bacterium Brachybacterium saurashtrense JG06 with Arachis hypogaea leads to changes in physio-biochemical activity of plants to cope with nitrogen starvation conditions	Alexander et al., 2021	Plant-microbe interactions are widely accepted, steady, and native methods used against different environmental stress conditions. In this study, peanut plants grown under control (with N2) and stressed (N2 deficit) conditions with or without the bacterium Brachybacterium saurashtrense were assessed for different physio-biochemical activities and differential gene expression. Higher shoot (24–25 …	Rejected	No acdS expression
ACC-deaminase' + ' gene expression' + 'drought stress' + 'plants' +'PGPR'	Google Scholar	Plant growth promoting rhizobacteria isolated from halophytes and drought‐tolerant plants: genomic characterisation and exploration of phyto‐beneficial traits	Leontidou et al., 2020	Plant growth promoting rhizobacteria (PGPR) are able to provide cross‐protection against multiple stress factors and facilitate growth of their plant symbionts in many ways. the aim of this study was to isolate and characterize rhizobacterial strains under natural conditions, associated with naturally occurring representatives of wild plant species and a local tomato cultivar, growing in differen…	Accepted
ACC-deaminase' + ' gene expression' + 'drought stress' + 'plants' +'PGPR'	Google Scholar	Interactions between Pseudomonas spp. and their role in improving the red T pepper plant growth under salinity stress	Samaddar et al., 2019	Solitary inoculation of bacteria has been studied widely for plant growth development and amelioration of salinity stress but co-inoculation of bacteria for salt stress amelioration in red pepper plants has been less studied till date. Here, we investigated the co-inoculation effect of Pseudomonas frederiksbergensis OB139 and Pseudomonas vancouverensis OB155 in red pepper plant growth characteris…	Rejected	Proteomic study
ACC-deaminase' + ' gene expression' + 'drought stress' + 'plants' +'PGPR'	Google Scholar	Improved method for effective screening of ACC (1-aminocyclopropane-1-carboxylate) deaminase producing microorganisms	Patil et al., 2016	Aminocyclopropane-1-carboxylate deaminase (ACCD) producing microorganisms support plant growth under a variety of biotic and abiotic stress conditions such as drought, soil salinity, flooding, heavy metal pollution and phyto-pathogen attack. Available screening methods for ACCD give idea only about its primary microbial ACCD activity than the actual potential. In the present investigation, we hav…	Rejected	Proteomic study
ACC-deaminase' + ' gene expression' + 'drought stress' + 'plants' +'PGPR'	Google Scholar	Genomic Diversity of Two Hydrocarbon-Degrading and Plant Growth-Promoting Pseudomonas Species Isolated from the Oil Field of Bóbrka (Poland)	Imperato et al., 2019	Hydrocarbon-degrading bacteria are important resources for use in phytoremediation applications. Yet, for many hydrocarbonoclastic strains the genetic information regarding pollutant degradation and detoxification has not been thoroughly revealed. In this study, hydrocarbon-degrading bacteria were isolated from a long-term oil-polluted soil in Bóbrka, Poland. Pseudomonas spp. was the most dominan…	Rejected	Proteomic study
ACC-deaminase' + ' gene expression' + 'drought stress' + 'plants' +'PGPR'	Google Scholar	Identifying potential molecular factors involved in Bacillus amyloliquefaciens 5113 mediated abiotic stress tolerance in wheat	Abd El-Daim et al., 2017	• Abiotic stressors are main limiting factors for agricultural production around the world. Plant growth-promoting bacteria have been successfully used to improve abiotic stress tolerance in several crops including wheat. However, the molecular changes involved in the improvement of stress management are poorly understood. • The present investigation addressed some molecular factors involved in b…	Rejected	No acdS expression
ACC-deaminase' + ' gene expression' + 'drought stress' + 'plants' +'PGPR'	Google Scholar	Complete Genome Sequence of Enterobacter roggenkampii ED5, a Nitrogen Fixing Plant Growth Promoting Endophytic Bacterium With Biocontrol and Stress Tolerance Properties, Isolated From Sugarcane Root	Guo et al., 2020	Sugarcane is the leading economic crop in China, requires huge quantities of nitrogen in the preliminary plant growth stages. However, the use of an enormous amount of nitrogen fertilizer increases the production price, and have detrimental results on the environment, causes severe soil and water pollution. In this study, a total of 175 endophytic strains were obtained from the sugarcane roots, b…	Accepted
ACC-deaminase' + ' gene expression' + 'drought stress' + 'plants' +'PGPR'	Google Scholar	Isolation, identification, and detection of ACC deaminase gene-encoding rhizobacteria from rhizosphere of stressed pineapple	Jaya et al.,2019	ACC deaminase is a microbial cytoplasmic enzyme that cleaves ACC, a precursor of ethylene, in the stressed plant. The aims of this study were to isolate, identify, and detect the presence of ACC deaminase gene-encoding rhizobac- teria from the rhizospheric soil of pineapple plants that have been exposed to abiotic and biotic stress, specifically herbicide, flooding, and Phytophthora spp. stress. …	Rejected	No abiotic stress
ACC-deaminase' + ' gene expression' + 'drought stress' + 'plants' +'PGPR'	Google Scholar	Soybean abiotic stress tolerance is improved by beneficial rhizobacteria in biosolids-amended soil	McMillan et al., 2022	Soybean responds to heat and water deficit by producing ethylene, which in high concentrations reduces plant biomass. One way for soybean to tolerate stress is to associate with rhizobacteria that lower the ethylene con- centration by hydrolyzing the molecular precursor with the extracellular enzyme 1-aminocyclopropane-1- carboxylate deaminase (ACC deaminase). Organic fertilizer could enhance soy…	Accepted
ACC-deaminase' + ' gene expression' + 'drought stress' + 'plants' +'PGPR'	Google Scholar	Amelioration of drought stress in Foxtail millet (Setaria italica L.) by P‐solubilizing drought‐tolerant microbes with multifarious plant growth promoting attributes	Kour et al., 2020	Drought is the most limiting factors affecting plant development. It severely affects the crops and leads to serious reductions in yield. There are certain nutrients which also act as limiting factor for plants such as phosphorus and nitrogen. Under the conditions of nutrient limitations, growth is greatly reduced. Plant associated microbiome are gaining attention as they help the host (plant) to…	Rejected	Proteomic study
ACC-deaminase' + ' gene expression' + 'drought stress' + 'plants' +'PGPR'	Google Scholar	Plant growth-promoting rhizobacteria (PGPR): emergence in agriculture	Bhattacharyya-Jha, 2012	Plant growth-promoting rhizobacteria (PGPR) are the rhizosphere bacteria that can enhance plant growth by a wide variety of mechanisms like phosphate solubilization, siderophore production, biological nitrogen fixation, rhizo- sphere engineering, production of 1-Aminocyclopropane-1- carboxylate deaminase (ACC), quorum sensing (QS) signal interference and inhibition of biofilm formation, phytohor-…	Rejected	Review
ACC-deaminase' + ' gene expression' + 'drought stress' + 'plants' +'PGPR'	Google Scholar	Synergistic association of endophytic fungi enhances Glycine max L. resilience to combined abiotic stresses: Heavy metals, high temperature and drought stress	Bilal et al., 2020	Recently, the use of endophytic fungi for promoting growth and alleviating abiotic stress has gained considerable attention. However, the association of compatible endophytic fungi with crop plants under simultaneous effects of abiotic stresses is less explored. The current study elucidated the interactive effects of hormone (gibberellins and indole-3-acetic acid)-producing and combined multi-abi…	Rejected	No acdS expression
ACC-deaminase' + ' gene expression' + 'drought stress' + 'plants' +'PGPR'	Google Scholar	Rhizobia as a Source of Plant Growth-Promoting Molecules: Potential Applications and Possible Operational Mechanisms	Jaiswal et al., 2020	The symbiotic interaction between rhizobia and legumes that leads to nodule formation is a complex chemical conversation involving plant release of nod-gene inducing signal molecules and bacterial secretion of lipo-chito-oligossacharide nodulation factors. During this process, the rhizobia and their legume hosts can synthesize and release various phytohormones, such as IAA, lumichrome, riboflavin…	Rejected	review
ACC-deaminase' + ' gene expression' + 'drought stress' + 'plants' +'PGPR'	Google Scholar	Exploitation of Multifarious Abiotic Stresses, Antagonistic Activity and Plant Growth Promoting Attributes of Bacillus amyloliquefaciens AH53 for Sustainable Agriculture Production	Jamali et al., 2018	Due to climate change, abiotic and biotic stresses like soil salinity, drought, pH, high temperature and plant fungal diseases are major threat for agriculture production and which reduces the growing demand of food of the population. To cope the adverse effect of such stresses, use of wide variety of synthetic chemical fertilizers cause serious hazardous effects on environment, soil, water and h…	Rejected	Proteomic study
ACC-deaminase' + ' gene expression' + 'drought stress' + 'plants' +'PGPR'	Google Scholar	Putative bacterial volatile-mediated growth in soybean (Glycine max L. Merrill) and expression of induced proteins under salt stress	Vaishnav et al., 2015	Aims: Plant root-associated rhizobacteria elicit plant immunity referred to as induced systemic tolerance (IST) against multiple abiotic stresses. Among multibacterial determinants involved in IST, the induction of IST and promotion of growth by putative bacterial volatile compounds (VOCs) is reported in the present study. Methods and Results: To characterize plant proteins induced by putative ba…	Rejected	Proteomic study
ACC-deaminase' + ' gene expression' + 'drought stress' + 'plants' +'PGPR'	Google Scholar	Rhizosphere bacteria containing 1-aminocyclopropane-1- carboxylate deaminase increase yield of plants grown in drying soil via both local and systemic hormone signalling	Belimov et al., 2008	• Decreased soil water availability can stimulate production of the plant hormone ethylene and inhibit plant growth. Strategies aimed at decreasing stress ethylene evolution might attenuate its negative effects. • An environmentally benign (nonchemical) method of modifying crop ethylene relations – soil inoculation with a natural root-associated bacterium Variovorax paradoxus 5C-2 (containing the…	Rejected	Proteomic study
ACC-deaminase' + ' gene expression' + 'drought stress' + 'plants' +'PGPR'	Google Scholar	Inoculum pretreatment affects bacterial survival, activity and catabolic gene expression during phytoremediation of diesel contaminated soil	Khan et al., 2013	Plant–bacteria partnership is a promising approach for remediating soil contaminated with organic pollutants. The colonization and metabolic activity of an inoculated microorganism depend not only on envi- ronmental conditions but also on the physiological condition of the applied microorganisms. This study assessed the influence of different inoculum pretreatments on survival, gene abundance and…	Rejected	No acdS expression
ACC-deaminase' + ' gene expression' + 'drought stress' + 'plants' +'PGPR'	Google Scholar	Ocimum metabolomics in response to abiotic stresses: Cold, flood, drought and salinity	Rastogi et al., 2019	Ocimum tenuiflorum is a widely used medicinal plant since ancient times and still continues to be irreplaceable due to its properties. The plant has been explored chemically and pharmacologically, however, the molecular studies have been started lately. In an attempt to get a comprehensive overview of the abiotic stress response in O. tenuiflorum, de novo transcriptome sequencing of plant leaves …	Rejected	No acdS expression
ACC-deaminase' + ' gene expression' + 'drought stress' + 'plants' +'PGPR'	Google Scholar	Genetic Screening and Expression Analysis of Psychrophilic Bacillus spp. Reveal Their Potential to Alleviate Cold Stress and Modulate Phytohormones in Wheat	Zubair et al., 2019	Abiotic stress in plants pose a major threat to cereal crop production worldwide and cold stress is also notorious for causing a decrease in plant growth and yield in wheat. The present study was designed to alleviate cold stress on plants by inoculating psychrophilic PGPR bacteria belonging to Bacillus genera isolated from extreme rhizospheric environments of Qinghai-Tibetan plateau. The genetic…	Rejected	No drought stress
ACC-deaminase' + ' gene expression' + 'drought stress' + 'plants' +'PGPR'	Google Scholar	Rhizoremediation prospects of Polyaromatic hydrocarbon degrading rhizobacteria, that facilitate glutathione and glutathione-S-transferase mediated stress response, and enhance growth of rice plants in pyrene contaminated soil	Singha et al., 2018	Rhizoremediation is a strategy where pollutant degrading bacteria are augmented through plant roots using plant-microbe interaction. Therefore, for effective rhizoremediation of pyrene contaminated soil, bacterial strains were experimented for amelioration of stress response in host plant along with biodegradation ability. A total of 28 bacteria, having ability to degrade polycyclic aromatic hydr…	Rejected	Proteomic study
ACC-deaminase' + ' gene expression' + 'drought stress' + 'plants' +'PGPR'	Google Scholar	Klebsiella sp. confers enhanced tolerance to salinity and plant growth promotion in oat seedlings (Avena sativa)	Sapre et al., 2018	Plant growth and yield is adversely affected by soil salinity. Salt tolerant plant growth-promoting rhizobacteria (PGPR) strain IG 3 was isolated from rhizosphere of wheat plants. The isolate IG 3 was able to grow in presence of NaCl ranging from 0 to 20% in Luria Bertani medium. The present study was planned to evaluate the role of inoculation of PGPR strain IG 3 and its efficacy in augmenting s…	Rejected	Proteomic study
ACC-deaminase' + ' gene expression' + 'drought stress' + 'plants' +'PGPR'	Google Scholar	Biofilm forming rhizobacteria enhance growth and salt tolerance in sunflower plants by stimulating antioxidant enzymes activity	Yasmeen et al., 2020	Salinity stress is one of the major environmental stresses that impose global socio-economic impacts, as well as hindering crop productivity. Halotolerant plant growth-promoting rhizobacteria (PGPR) having potential to cope with salinity stress can be employed to counter this issue in eco-friendly way. In the present investigation, halotolerant PGPR strains, AP6 and PB5, were isolated from saline…	Rejected	Proteomic study
ACC-deaminase' + ' gene expression' + 'drought stress' + 'plants' +'PGPR'	Google Scholar	Characterization of ACC deaminase-producing endophytic bacteria isolated from copper-tolerant plants and their potential in promoting the growth and copper accumulation of Brassica napus	Zhang et al., 2011	One hundred Cu-resistant-endophytic bacteria were isolated from Cu-tolerant plants grown on Cu mine wasteland, of which, eight Cu-resistant and 1-aminocyclopropane-1-carboxylate (ACC) deaminase-pro- ducing endophytic bacteria were obtained based on the ACC deaminase activity of the bacteria and char- acterized with respect to metal resistance, production of ACC deaminase, indole-3-acetic acid (IA…	Rejected	Proteomic study
ACC-deaminase' + ' gene expression' + 'drought stress' + 'plants' +'PGPR'	Google Scholar	Exogenous Spermidine Inhibits Ethylene Production in Leaves of Cucumber Seedlings under NaCl Stress	Li et al., 2013	ABSTRACT. To examine whether 1 mM of spermidine (Spd) modifies plant ethylene production in response to short- term salt stress, cucumber (Cucumis sativus) seedlings were grown in nutrient solution with or without 75 mM NaCl stress for 3 days, and the leaves were sprayed with 1 mM Spd or water (control). We investigate the effects of the treatments on ethylene production, 1-aminocyclopropane-1-ca…	Rejected	No drought stress
ACC-deaminase' + ' gene expression' + 'drought stress' + 'plants' +'PGPR'	Google Scholar	Rhizobacteria-induced systemic tolerance against drought stress in Sorghum bicolor (L.) Moench	Carlson et al., 2020	Induction of systemic tolerance in sorghum [Sorghum bicolor (L.) Moench] against drought stress was studied by screening a large collection of rhizobacterial isolates for their potential to exhibit this essential plant growth- promoting trait. This was done by means of a greenhouse assay that measured the relative change in both plant height and -biomass (roots and shoots) between rhizobacteria-p…	Accepted
ACC-deaminase' + ' gene expression' + 'drought stress' + 'plants' +'PGPR'	Google Scholar	Ethylene Response Factor Sl-ERF.B.3 Is Responsive to Abiotic Stresses and Mediates Salt and Cold Stress Response Regulation in Tomato	Klay et al., 2014	Sl-ERF.B.3 (Solanum lycopersicum ethylene response factor B.3) gene encodes for a tomato transcription factor of the ERF (ethylene responsive factor) family. Our results of real-time RT-PCR showed that Sl-ERF.B.3 is an abiotic stress responsive gene, which is induced by cold, heat, and flooding, but downregulated by salinity and drought. To get more insight into the role of Sl-ERF.B.3 in plant re…	Rejected	No acdS expression
ACC-deaminase' + ' gene expression' + 'drought stress' + 'plants' +'PGPR'	Google Scholar	Implications of ethylene biosynthesis and signaling in soybean drought stress tolerance	Arraes et al.,2015	Background: Ethylene is a phytohormone known for inducing a triple response in seedlings, leaf abscission and other responses to various stresses. Several studies in model plants have evaluated the importance of this hormone in crosstalk signaling with different metabolic pathways, in addition to responses to biotic stresses. However, the mechanism of action in plants of agricultural interest, su…	Accepted
ACC-deaminase' + ' gene expression' + 'drought stress' + 'plants' +'PGPR'	Google Scholar	Inoculation of growing media with the rhizobacterium Variovorax paradoxus 5C-2 reduces unwanted stress responses in hardy ornamental species	Sharp et al., 2011	Inoculation of growing media with plant growth promoting rhizobacteria (PGPR) has a number of poten- tial benefits for the production of ornamental plants. Certain rhizobacteria synthesise the enzyme ACC deaminase, which cleaves ACC, the precursor of the plant hormone ethylene. Bacterial metabolism is now known to lead to a reduction in [ACC] in the plant transpiration stream and bacteria are hyp…	Rejected	No acdS expression
ACC-deaminase' + ' gene expression' + 'drought stress' + 'plants' +'PGPR'	Google Scholar	Transcriptional Profiling Implicates Novel Interactions between Abiotic Stress and Hormonal Responses in Thellungiella, a Close Relative of Arabidopsis	Wong et al., 2006	Thellungiella, an Arabidopsis (Arabidopsis thaliana)-related halophyte, is an emerging model species for studies designed to elucidate molecular mechanisms of abiotic stress tolerance. Using a cDNA microarray containing 3,628 unique sequences derived from previously described libraries of stress-induced cDNAs of the Yukon ecotype of Thellungiella salsuginea, we obtained transcript profiles of its…	Accepted
ACC-deaminase' + ' gene expression' + 'drought stress' + 'plants' +'PGPR'	Google Scholar	The modulation of leguminous plant ethylene levels by symbiotic rhizobia played a role in the evolution of the nodulation process	Nascimento et al., 2018	Ethylene plays an important role in regulating the rhizobial nodulation process. Consequently, numerous strains of rhizobia possess the ability to decrease plant ethylene levels by the expression of the enzyme 1-aminocyclopropane-1- carboxylate (ACC) deaminase or via the production of rhizobitoxine, thus, leading to an increased ability to nodulate leguminous plants. Nevertheless, not much is und…	Rejected	No abiotic stress
ACC-deaminase' + ' gene expression' + 'drought stress' + 'plants' +'PGPR'	Google Scholar	Halotolerant rhizobacteria Pseudomonas pseudoalcaligenes and Bacillus subtilis mediate systemic tolerance in hydroponically grown soybean (Glycine max L.) against salinity stress	Yasmin et al., 2020	Salt stress is one of the devastating factors that hampers growth and productivity of soy- bean. Use of Pseudomonas pseudoalcaligenes to improve salt tolerance in soybean has not been thoroughly explored yet. Therefore, we observed the response of hydroponically grown soybean plants, inoculated with halotolerant P. pseudoalcaligenes (SRM-16) and Bacillus subtilis (SRM-3) under salt stress. In vit…	Rejected	Proteomic study
ACC-deaminase' + ' gene expression' + 'drought stress' + 'plants' +'PGPR'	Google Scholar	Inoculation with Azospirillum sp. and Herbaspirillum sp. Bacteria Increases the Tolerance of Maize to Drought Stress	Curá et al., 2017	Stress drought is an important abiotic factor that leads to immense losses in crop yields around the world. Strategies are urgently needed to help plants adapt to drought in order to mitigate crop losses. Here we investigated the bioprotective effects of inoculating corn grown under drought conditions with two types of plant growth-promoting rhizobacteria (PGPR), A. brasilense, strain SP-7, and H…	Rejected	Proteomic study
ACC-deaminase' + ' gene expression' + 'drought stress' + 'plants' +'PGPR'	Google Scholar	Phomopsis liquidambaris reduces ethylene biosynthesis in rice under salt stress via inhibiting the activity of 1‐aminocyclopropane‐1‐carboxylate deaminase	Siddikee et al., 2021	The endophytic fungus Phomopsis liquidambaris is characterized as a plant growth-promoting agent under salt stress, but its mechanism is unknown. Herein, 1-aminocyclopropane-1-carboxylate deaminase (ACCD) from the strain was confirmed that it had the ability of utilizing 1-aminocyclopropane-1-carboxylate as the sole nitrogen source. The full-length ACCD gene was 1152 bp, which encodes a mature pr…	Rejected	Fungi
ACC-deaminase' + ' gene expression' + 'drought stress' + 'plants' +'PGPR'	Google Scholar	Plant beneficial endophytic bacteria: Mechanisms, diversity, host range and genetic determinants	Afzal et al., 2019	Endophytic bacteria are the plant beneficial bacteria that thrive inside plants and can improve plant growth under normal and challenging conditions. They can benefit host plants directly by improving plant nutrient uptake and by modulating growth and stress related phytohormones. Indirectly, endophytic bacteria can im- prove plant health by targeting pests and pathogens with antibiotics, hydroly…	Rejected	Review
ACC-deaminase' + ' gene expression' + 'drought stress' + 'plants' +'PGPR'	Google Scholar	Combined effects of the plant growth-promoting bacterium Pseudomonas putida UW4 and salinity stress on the Brassica napus proteome	Cheng et al., 2013	The influences of two strains of Pseudomonas putida UW4, a plant growth-promoting bacterium (PGPB) on the shoot and root proteomic profiles of Brassica napus (canola) were examined under salinity stress using two-dimensional difference gel electrophoresis. The two strains (wild-type UW4 and an AcdS minus mutant strain) differ in the availability of a functional 1-aminocyclopropane-1-carboxylic ac…	Rejected	Proteomic study
ACC-deaminase' + ' gene expression' + 'drought stress' + 'plants' +'PGPR'	Google Scholar	Draft Genome Analysis Offers Insights Into the Mechanism by Which Streptomyces chartreusis WZS021 Increases Drought Tolerance in Sugarcane	Wang et al., 2019	Drought directly affects sugarcane production. Plant growth-promoting bacteria have gained attention as growth promoters of plants under abiotic stresses. The present study focused on genome assessment of the plant-beneficial endophyte Streptomyces chartreusis WZS021 and its vital role in sugarcane plants under drought stress. Based on in vitro plant growth-promoting trait analyses, WZS021 had mu…	Rejected	Proteomic study
ACC-deaminase' + ' gene expression' + 'drought stress' + 'plants' +'PGPR'	Google Scholar	Development of plant-microbe phytoremediation system for petroleum hydrocarbon degradation: An insight from alkb gene expression and phytotoxicity analysis	Iqbal et al., 2019		Rejected	No abiotic stress
ACC-deaminase' + ' gene expression' + 'drought stress' + 'plants' +'PGPR'	Google Scholar	Rhizosphere bacteria containing 1-aminocyclopropane-1- carboxylate deaminase increase growth and photosynthesis of pea plants under salt stress by limiting Na+ accumulation	Wang et al., 2016	Although plant salt tolerance has been improved by soil inoculation with rhizobacteria containing the enzyme 1-aminocyclopropane-1-carboxylate (ACC) deaminase (which metabolises ACC, the immediate precursor of the phytohormone ethylene), it is not always clear whether ion homeostasis and plant water relations are affected. When pea (Pisum sativum L. cv. Alderman) was grown with 70 and 130 mM NaCl…	Rejected	Proteomic study
ACC-deaminase' + ' gene expression' + 'drought stress' + 'plants' +'PGPR'	Google Scholar	Microbe-mediated alleviation of drought stress and acquisition of phosphorus in great millet (Sorghum bicolour L.) by drought-adaptive and phosphorus-solubilizing microbes	Kour et al., 2020	Among the extreme habitats, drought is most harsh abiotic stress affecting growth, development and produc- tivity of crops. Plants also face limitations of certain nutrients such as phosphorus required for different physi- ological and metabolic activities. Stress-adaptive phosphorus-solubilizing microbes in rhizospheric soil can help plants to combat water scarcity and overcome the problem of ph…	Rejected	Proteomic study
ACC-deaminase' + ' gene expression' + 'drought stress' + 'plants' +'PGPR'	Google Scholar	Plant Growth-Promoting Characteristics of Salt Tolerant Enterobacter cloacae Strain KBPD and Its Efficacy in Amelioration of Salt Stress in Vigna radiata L.	Bhise et al.,2017	Plant growth-promoting salt-tolerant bacteria can increase plant resistance to salt stress and correspond to an environmentally friendly approach to alleviate salt stress. With this approach, forty different bacterial species were isolated from salt-affected soil of Kolhapur, Maha- rashtra, India. Isolates were investigated for the expression of plant growth-promoting traits at five salt stress l…	Rejected	Proteomic study
ACC-deaminase' + ' gene expression' + 'drought stress' + 'plants' +'PGPR'	Google Scholar	Characterization of ACC Deaminase producing B. cepacia, C. feurendii and S. marcescens for Plant Growth Promoting activity	Maxton et al., 2017	Finding solutions to global issues like food security entails greater use of chemicals fertilizers, pesticides, fungicides etc. posing serious risks of soil salinity, heavy metal bioaccumulation. PGPR produce enzyme ACC deaminase which degrades (ACC) 1- aminocyclopropane-1-carobylic acid the immediate precursor of the plant growth hormone ethylene, into α-ketobutyrate and ammonia, thus lowering t…	Rejected	Proteomic study
ACC-deaminase' + ' gene expression' + 'drought stress' + 'plants' +'PGPR'	Google Scholar	Azospirillum lipoferum FK1 confers improved salt tolerance in chickpea (Cicer arietinum L.) by modulating osmolytes, antioxidant machinery and stress- related genes expression	El-Esawi et al., 2019	High salinity restricts crop growth and yield. Plant growth-promoting soil rhizobacteria boost crops growth and ameliorate the adverse effects of salt stress through regulating several physiological, biochemical and molecular processes. This study investigated the effects of Azospirillum lipoferum FK1 strain on chickpea (Cicer arietinum L.) growth and performance under saline conditions (0, 75 an…	Rejected	No acdS expression
ACC-deaminase' + ' gene expression' + 'drought stress' + 'plants' +'PGPR'	Google Scholar	Salt-tolerant plant growth-promoting Bacillus pumilus strain JPVS11 to enhance plant growth attributes of rice and improve soil health under salinity stress	Kumar et al., 2021	Rice (Oryza sativa L.) growth and productivity has been negatively affected due to high soil salinity. However, some salt-tolerant plant growth-promoting bacteria (ST-PGPB) enhance crop growth and reduce the negative impacts of salt stress through regulation of some biochemical, physiological, and molecular features. Total thirty six ST-PGPB were isolated from sodic soil of eastern Uttar Pradesh,…	Rejected	Proteomic study
ACC-deaminase' + ' gene expression' + 'drought stress' + 'plants' +'PGPR'	Google Scholar	Properties of Astragalus sp. microsymbionts and their putative role in plant growth promotion	Wdowiak et al., 2016	The plant growth-promoting rhizobacteria have developed many different (indirect and direct) mechanisms that have a positive effect on plant growth and develop- ment. Strains isolated from Astragalus cicer and Astragalus glycyphyllos root nodules were investigated for their plant growth-promoting properties such as production of indole- 3-acetic acid (IAA) and siderophores, phosphate solubili- za…	Rejected	Phylogenesis study
ACC-deaminase' + ' gene expression' + 'drought stress' + 'plants' +'PGPR'	Google Scholar	Co-cultivation of Trichoderma asperellum GDFS1009 and Bacillus amyloliquefaciens 1841 Causes Differential Gene Expression and Improvement in the Wheat Growth and Biocontrol Activity	Karuppiah et al., 2019	n an effort to balance the demands of plant growth promoting and biological control agents in a single product, the technology on the co-cultivation of two microbes, Trichoderma asperellum GDFS1009 and Bacillus amyloliquefaciens 1841 has been developed and demonstrated its effectiveness in synergistic interactions and its impact on the plant growth and biocontrol potential. In this study, optimiz…	Rejected	Fungi
ACC-deaminase' + ' gene expression' + 'drought stress' + 'plants' +'PGPR'	Google Scholar	Structural characteristics and plant-beneficial effects of bacteria colonizing the shoots of field grown conventional and genetically modified T4-lysozyme producing potatoes	Rasche et al., 2006	Genetically modified potatoes expressing antibacterial protein T4 lysozyme may offer effective control strategies for bacterial pathogens causing severe potato diseases. Apart from this beneficial effect, it is very important to investigate such engineered potatoes carefully for potential adverse effects on potato-associated bacteria which frequently exhibit plant beneficial functions such as pla…	Rejected	Proteomic study
ACC-deaminase' + ' gene expression' + 'drought stress' + 'plants' +'PGPR'	Google Scholar	The plant-growth-promoting bacterium Klebsiella sp. SBP-8 confers induced systemic tolerance in wheat (Triticum aestivum) under salt stress	Singh et al., 2015	Plant-growth-promoting bacteria (PGPB) with 1-aminocyclopropane-1-carboxylatedeaminase (ACCD) activity can protect plants from the deleterious effects of abioticstressors. An ACCD bacterial strain, SBP- 8, identified as Klebsiella sp., also having other plant-growth-promoting activities, was isolated from Sorghum bicolor growing in the desertregion of Rajasthan, India. ACCD activity of SBP-8 was …	Rejected	Proteomic study
ACC-deaminase' + ' gene expression' + 'drought stress' + 'plants' +'PGPR'	Google Scholar	Mealworm frass as a potential biofertilizer and abiotic stress tolerance- inductor in plants	Poveda et al., 2019	Frass from the insect Tenebrio molitor can be applied as an organic fertilizer due to its nutritional content. In this study insects were fed on different types of food producing excrement with different compositions. This allowed us to compare the potential effect of the excrement on plant growth promotion and to test its ability to increase tolerance to abiotic stresses such as drought, excess …	Rejected	Insect
ACC-deaminase' + ' gene expression' + 'drought stress' + 'plants' +'PGPR'	Google Scholar	Extremophiles as Plant Probiotics to Promote Germination and Alleviate Salt Stress in Soybean	Santos et al., 2022	Bacteria isolated from extreme environments have been shown to promote plant growth under challenging conditions. This study aimed to examine the performance of the extremophilic microorganisms under salt stress and their ability to improve the tolerance of soybean plants to this stress. In vitro experiments showed that bacteria belonging to the genera Stenotrophomonas and Exiguobacterium were ha…	Rejected	No acdS expression
ACC-deaminase' + ' gene expression' + 'drought stress' + 'plants' +'PGPR'	Google Scholar	Beneficial rhizobacteria from rice rhizosphere confers high protection against biotic and abiotic stress inducing systemic resistance in rice seedlings	Lucas et al., 2014	The present study reports a screening for PGPR in a highly selective environment, the rhizosphere of rice plants, in southwestern of Spain. Among the 900 isolates, only 38% were positive for at least one of the biochemical activities to detect putative PGPR. The best 80 isolates were selected and identified by 16S rRNA partial sequencing. Among these, 13 strains were selected for growth promotion…	Rejected	No acdS expression
ACC-deaminase' + ' gene expression' + 'drought stress' + 'plants' +'PGPR'	Google Scholar	Application of Plant-Growth- Promoting Fungi Trichoderma longibrachiatum T6 Enhances Tolerance of Wheat to Salt Stress through Improvement of Antioxidative Defense System and Gene Expression	Zhang et al., 2016	Soil salinity is a serious problem worldwide that reduces agricultural productivity. Trichoderma longibrachiatum T6 (T6) has been shown to promote wheat growth and induce plant resistance to parasitic nematodes, but whether the plant-growth-promoting fungi T6 can enhance plant tolerance to salt stress is unknown. Here, we determined the effect of plant-growth-promoting fungi T6 on wheat seedlings…	Rejected	Fungi
ACC-deaminase' + ' gene expression' + 'drought stress' + 'plants' +'PGPR'	Google Scholar	Rhizobacterium-mediated growth promotion and expression of stress enzymes in Glycine max L. Merrill against Fusarium wilt upon challenge inoculation	Jain et al., 2014	Wilt disease of soybean caused by a very com- mon soil-borne fungus, Fusarium oxysporum is one of the most destructive diseases of the crop. The aim of the present study was to characterize plant growth-promotion activities and induced resistance of a rhizobacterial strain for the soybean plant against F. oxysporum. Rhizobacterium strain SJ-5 exhibited plant growth-promotion characteristics and a…	Rejected	Biotic stress
ACC-deaminase' + ' gene expression' + 'drought stress' + 'plants' +'PGPR'	Google Scholar	Halo-tolerant plant growth promoting rhizobacteria for improving productivity and remediation of saline soils	Kumar Arora et al., 2020	Background: The collective impact of climate change and soil salinity is continuously increasing the degraded lands across the globe, bringing agricultural productivity and food security under stress. The high concentration of salts in saline soils impose osmotic, ionic, oxidative and water stress in plants. Biological solutions can be the most reliable and sustainable approach to ensure food sec…	Rejected	Review
ACC-deaminase' + ' gene expression' + 'drought stress' + 'plants' +'PGPR'	Google Scholar	Investigation of ACC-Deaminase and Indole Acetic Acid Producing Bacteria from Rhizospheric Soils	Alaylar et al., 2021	Plant growth promoting rhizobacteria (PGPR) have critical role in promoting plant growth and health with various mechanisms. Production of indole acetic acid (IAA) and 1- aminocyclopropane-1-carboxylate (ACC) deaminase activity are well-known plant growth promoting (PGP) properties. In the current study; A total of 48 morphologically distinct bacterial colonies were chosen during the isolation of…	Rejected	Proteomic study
ACC-deaminase' + ' gene expression' + 'drought stress' + 'plants' +'PGPR'	Google Scholar	Investigation of ACC-Deaminase and Indole Acetic Acid Producing Bacteria from Rhizospheric Soils in Ağrı Province	Alaylar et al., 2021		Rifiutato	Duplicate
ACC-deaminase' + ' gene expression' + 'drought stress' + 'plants' +'PGPR'	Google Scholar	Bioprospecting of Plant Growth Promoting Bacilli and Related Genera Prevalent in Soils of Pristine Sacred Groves: Biochemical and Molecular Approach	Lyngwi et al., 2016	Bacillus spp. and related genera native to soils of the pristine sacred groves from Meghalaya, India were characterized using biochemical and 16S rRNA gene analysis which revealed dominance of Bacillus, Paenibacillus, Lysinibacillus and Viridibacillus in the groves. Biochemical estimation was carried out for in vitro testing of plant growth promoting traits present in these isolates. PCR screenin…	Rejected	Proteomic study
ACC-deaminase' + ' gene expression' + 'drought stress' + 'plants' +'PGPR'	Google Scholar	Hydrocarbon degradation potential and plant growth-promoting activity of culturable endophytic bacteria of Lotus corniculatus and Oenothera biennis from a long-term polluted site	Pawlik et al., 2017	Many endophytic bacteria exert beneficial effects on their host, but still little is known about the bacteria associated with plants growing in areas heavily polluted by hydrocarbons. The aim of the study was characterization of culturable hydrocarbon-degrading endophytic bacteria associated with Lotus corniculatus L. and Oenothera biennis L. collected in long-term petroleum hydrocarbon-polluted …	Rejected	No drought stress
ACC-deaminase' + ' gene expression' + 'drought stress' + 'plants' +'PGPR'	Google Scholar	Drought‐tolerant Bacillus megaterium isolated from semi‐arid conditions induces systemic tolerance of wheat under drought conditions	Rashid et al., 2022	Drought stress, a major challenge under current climatic conditions, adversely affects wheat productivity. In the current study, we observed the response of wheat plants, inoculated with drought-tolerant plant growth-promoting rhizo- bacteria (PGPR) Bacillus megaterium (MU2) and Bacillus licheniformis (MU8) under induced drought stress. In vitro study of 90 rhizobacteria exhibited 38 isolates sho…	Rejected	Proteomic study
ACC-deaminase' + ' gene expression' + 'drought stress' + 'plants' +'PGPR'	Google Scholar	Silicate Solubilization and Plant Growth Promoting Potential of Rhizobium Sp. Isolated from Rice Rhizosphere	Chandrakala et al., 2019	Silicon is a beneficial plant nutrient with a vital role in maintaining plant growth and enhancing tolerance to both biotic and abiotic stresses. The polymeric insoluble silica present in soils is solubilised during weathering to release monosilicic acid into the soil solution which is the bioavailable form of silicon absorbed by plants. In the present study, a silicate solubilizing bacterial iso…	Rejected	Proteomic study
ACC-deaminase' + ' gene expression' + 'drought stress' + 'plants' +'PGPR'	Google Scholar	Pyridoxal 5′-phosphate enhances the growth and morpho-physiological characteristics of rice cultivars by mitigating the ethylene accumulation under salinity stress	Hussain et al., 2020	Salinity-induced ethylene accumulation caused by high production of 1-aminocyclopropane-1-carboxylic acid (ACC) hinders rice plant growth and development. Nevertheless, ACC deaminase may alleviate salt stress and high ethylene production in rice cultivars under salinity stress. Pyridoxal 5′-phosphate (PLP), an ACC deaminase co-factor, could be a useful ACC inhibitor in plants; however, it has not…	Rejected	Proteomic study
ACC-deaminase' + ' gene expression' + 'drought stress' + 'plants' +'PGPR'	Google Scholar	Non-pathogenic Staphylococcus strains augmented the maize growth through oxidative stress management and nutrient supply under induced salt stress	Shahid et al., 2019	Purpose The present study was conducted to elucidate the role of phytobeneficial bacteria to control the cellular oxidative damage in maize (Zea mays L.) plants caused by salinity. Methods Bacteria were isolated from the rhizosphere of kallar grass (Leptochloa fusca L.) through serial dilution method and taxonomically identified on the basis of their 16S ribosomal RNA gene sequencing. In vitro ph…	Rejected	Proteomic study
ACC-deaminase' + ' gene expression' + 'drought stress' + 'plants' +'PGPR'	Google Scholar	Differential gene expression of rice roots inoculated with the diazotroph Herbaspirillum seropedicae	Brusamarello-Santos et al., 2012	Background and aims Rice (Oryza sativa L.) is the primary source of carbohydrate for the majority of the World's population. Herbaspirillum seropedicae is a diazotroph that lives within and on the surface of rice roots. It can promote the growth of rice, partly by supplying it with fixed nitrogen. Methods To better understand the rice–H. seropedi- cae interaction, cDNA libraries from rice roots e…	Rejected	No acdS expression
ACC-deaminase' + ' gene expression' + 'drought stress' + 'plants' +'PGPR'	Google Scholar	Environmental Adaptations of an Extremely Plant Beneficial Bacillus subtilis Dcl1 Identified Through the Genomic and Metabolomic Analysis	Jayakumar et al., 2021	Bacterial endophytes ubiquitously colonize the internal tissues of plants and promote the plant growth through diverse mecha- nisms. The current study describes the mechanistic basis of plant-specific adaptations present in an extremely beneficial endophytic bacterium. Here, the endophytic Bacillus subtilis Dcl1 isolated from the dried rhizome of Curcuma longa was found to have the drought tolera…	Rejected	Proteomic study
ACC-deaminase' + ' gene expression' + 'drought stress' + 'plants' +'PGPR'	Google Scholar	Environmental Adaptations of an Extremely Plant Beneficial Bacillus subtilis Dcl1 Identified Through the Genomic and Metabolomic Analysis	Jayakumar et al., 2021		Rejected	Duplicate
ACC-deaminase' + ' gene expression' + 'drought stress' + 'plants' +'PGPR'	Google Scholar	Salinity Stress: Toward Sustainable Plant Strategies and Using Plant Growth-Promoting Rhizobacteria Encapsulation for Reducing It	Saberi Riseh et al., 2021	Salinity is one of the most important abiotic stresses that influences plant growth and productivity worldwide. Salinity affects plant growth by ionic toxicity, osmotic stress, hormonal imbalance, nutrient mobilization reduction, and reactive oxygen species (ROS). To survive in saline soils, plants have developed various physiological and biochemical strategies such as ion exchange, activation of…	Rejected	Review
ACC-deaminase' + ' gene expression' + 'drought stress' + 'plants' +'PGPR'	Google Scholar	Identification and Characterization of Genes Responsible for Drought Tolerance in Rice Mediated by Pseudomonas fluorescens	SAAKRE et al., 2017	Drought is one of the major abiotic stresses which adversely affect crop plants limiting growth and yield potential. Structural and functional characterization of drought stress-induced genes has contributed to a better understanding of how plants respond and adapt to the drought stress. In the present study, differential display technique was employed to study the gene expression of rice plants …	Rejected	No acdS expression
ACC-deaminase' + ' gene expression' + 'drought stress' + 'plants' +'PGPR'	Google Scholar	Relationship between in vitro characterization and comparative efficacy of plant growth‐promoting rhizobacteria for improving cucumber salt tolerance	Nadeem et al., 2016	Phosphate solubilization, 1-aminocyclopropane-1-carboxylic acid (ACC)-deaminase activity and production of siderophores and indole acetic acid (IAA) are well-known traits of plant growth-promoting rhizobacteria (PGPR). Here we investigated the expression of these traits as affected by salinity for three PGPR strains (Pseudomonas fluorescens, Bacillus megaterium and Variovorax paradoxus) at two sa…	Rejected	Proteomic study
ACC-deaminase' + ' gene expression' + 'drought stress' + 'plants' +'PGPR'	Google Scholar	Soil Texture, Sampling Depth and Root Hairs Shape the Structure of ACC Deaminase Bacterial Community Composition in Maize Rhizosphere	Gebauer et al., 2021	Preservation of the phytostimulatory functions of plant growth-promoting bacteria relies on the adaptation of their community to the rhizosphere environment. Here, an amplicon sequencing approach was implemented to specifically target microorganisms with 1-aminocyclopropane-1-carboxylate deaminase activity, carrying the acdS gene. We stated the hypothesis that the relative phylogenetic distributi…	Rejected	No abiotic stress
ACC-deaminase' + ' gene expression' + 'drought stress' + 'plants' +'PGPR'	Google Scholar	Characterization and in planta nitrogen fixation of plant growth promoting endophytic diazotrophic Lysinibacillus sphaericus isolated from rice (Oryza sativa)	Shabanamol et al., 2018	This study was conducted to isolate and characterize endophytic diazotrophic isolates with multiple plant growth promoting attributes including biocontrol potential from surface sterilized leaf, stem and root samples of various rice cultivars of Kerala. A total of 18 endophytic diazotrophs were isolated using Dobereiner's semisolid N free bromothymol blue media. All the isolates were found to be …	Rejected	No abiotic stress
ACC-deaminase' + ' gene expression' + 'drought stress' + 'plants' +'PGPR'	Google Scholar	The Physiology of Plant Hormones in Cereal, Oilseed and Pulse Crops	Shabanamol et al., 2013	Plant hormones regulate virtually all aspects of plant growth and development, as well as plant responses to biotic and abiotic signals. Herein, we discuss three hormone groups, gibberellins, auxin and ethylene. These plant hormones influence seed germination, root, stem and leaf growth, flowering, and fruit and seed growth. In so doing, the hormone groups often interact with each other and with …	Rejected	Review
ACC-deaminase' + ' gene expression' + 'drought stress' + 'plants' +'PGPR'	Google Scholar	Diazotrophic Bacteria Pantoea dispersa and Enterobacter asburiae Promote Sugarcane Growth by Inducing Nitrogen Uptake and Defense-Related Gene Expression	Singh et al., 2021	Sugarcane is a major crop in tropical and subtropical regions of the world. In China, the application of large amounts of nitrogen (N) fertilizer to boost sugarcane yield is commonplace, but it causes substantial environmental damages, particularly soil, and water pollution. Certain rhizosphere microbes are known to be beneficial for sugarcane production, but much of the sugarcane rhizosphere mic…	Rejected	No acdS expression
ACC-deaminase' + ' gene expression' + 'drought stress' + 'plants' +'PGPR'	Google Scholar	Metabolic properties, gene functions, and biosafety analysis reveal the action of three rhizospheric plant growth‐promoting bacteria of Jujuncao (Pennisetum giganteum)	Yankey et al., 2022	This study aimed to identify the specific genes associated with plant growth promotion and cadmium tolerance in three bacteria strains associated with Pennisetum giganteum as well as to determine their biosafety levels in their potential use as biofertilizers for promoting plant growth and phytoremediation activities. The plant growth-promoting (PGP) abilities of Enterobacter cloacae strain RCB98…	Rejected	Proteomic study
ACC-deaminase' + ' gene expression' + 'drought stress' + 'plants' +'PGPR'	Google Scholar	Perspectives of plant-associated microbes in heavy metal phytoremediation	Rajkumar et al., 2012	"Phytoremediation" know-how to do-how is rapidly expanding and is being commercialized by harnessing the phyto-microbial diversity. This technology employs biodiversity to remove/contain pollutants from the air, soil and water. In recent years, there has been a considerable knowledge explosion in understanding plant-microbes-heavy metals interactions. Novel applications of plant-associated microb…	Rejected	Review
ACC-deaminase' + ' gene expression' + 'drought stress' + 'plants' +'PGPR'	Google Scholar	Osmoprotective functions conferred to soybean plants via inoculation with Sphingomonas sp. LK11 and exogenous trehalose	Asaf et al., 2017	Osmotic stress induced by drought can hinder the growth and yield of crop plants. To understand the eco- physiological role of osmoprotectants, the combined utilization of endophytes and osmolytes (trehalose) can be an ideal strategy used to overcome the adverse effects of drought. Hence, in the present study, we aimed to investigate the role of Sphingomonas sp. LK11, which produces phytohormones…	Rejected	No acdS expression
ACC-deaminase' + ' gene expression' + 'drought stress' + 'plants' +'PGPR'	Google Scholar	Proposed some interactions at molecular level of PGPR coinoculated with Bradyrhizobium diazoefficiens USDA110 and B. japonicum THA6 on soybean symbiosis and its potential of field application	Prakamhang et al., 2015	The objectives of this research were to select the appropriate plant growth promoting rhizobacteria (PGPR) and evaluate their influence in promoting nodulation and N2-fixing efficiency of soybean (Glycine max) by coinoculation with Bradyrhizobium diazoefficiens USDA110 and B. japonicum THA6 strains. Selected 12 PGPR performed a significant capability of promoting N2-fixation, nodule number, nodul…	Rejected	No acdS expression
ACC-deaminase' + ' gene expression' + 'drought stress' + 'plants' +'PGPR'	Google Scholar	Biodiversity and plant growth promoting traits of culturable endophytic actinobacteria associated with Jatropha curcas L. growing in Panxi dry-hot valley soil	Qin et al., 2015	One of the proposed mechanisms through which plant growth-promoting endophyte (PGPE) enhances plant growth is the production of 1-aminocyclopropane-1-carboxylic acid deaminase (ACCD). However, information about the endophytic actinobacteria with ACC deaminase activity associated with native plants is still very scarce. In this study, a total of 257 endophytic actinobacterial isolates were obtaine…	Rejected	Proteomic study
ACC-deaminase' + ' gene expression' + 'drought stress' + 'plants' +'PGPR'	Google Scholar	Bacillus subtilis strain GOT9 confers enhanced tolerance to drought and salt stresses in Arabidopsis thaliana and Brassica campestris	Woo et al., 2020	Soil is a primary source of water and inorganic nutrients vital for plant growth. In particular, the rhizosphere, a microecological region around the plant roots, is enriched with root exudates that enable beneficial microbial communities to form. Plant growth-promoting rhizobacteria (PGPR) are rhizosphere bacteria that contribute to the improvement of plant growth through diverse physiological m…	Rejected	No acdS expression
ACC-deaminase' + ' gene expression' + 'drought stress' + 'plants' +'PGPR'	Google Scholar	Transcriptome Analysis of Induced Systemic Drought Tolerance Elicited by Pseudomonas chlororaphis O6 in Arabidopsis thaliana	Cho et al., 2013	Root colonization by Pseudomonas chlororaphis O6 induces systemic drought tolerance in Arabidopsis thaliana. Microarray analysis was performed using the 22,800- gene Affymetrix GeneChips to identify differentially- expressed genes from plants colonized with or without P. chlororaphis O6 under drought stressed conditions or normal growth conditions. Root colonization in plants grown under regular …	Rejected	No acdS expression
ACC-deaminase' + ' gene expression' + 'drought stress' + 'plants' +'PGPR'	Google Scholar	Genomic Analysis of the 1-Aminocyclopropane-1-Carboxylate Deaminase-Producing Pseudomonas thivervalensis SC5 Reveals Its Multifaceted Roles in Soil and in Beneficial Interactions With Plants	Nascimento et al., 2021	Beneficial 1-aminocyclopropane-1-carboxylate (ACC) deaminase-producing bacteria promote plant growth and stress resistance, constituting a sustainable alternative to the excessive use of chemicals in agriculture. In this work, the increased plant growth promotion activity of the ACC deaminase-producing Pseudomonas thivervalensis SC5, its ability to limit the growth of phytopathogens, and the geno…	Rejected	No drought stress
ACC-deaminase' + ' gene expression' + 'drought stress' + 'plants' +'PGPR'	Google Scholar	Microbial inoculation in rice regulates antioxidative reactions and defense related genes to mitigate drought stress	Singh et al., 2020	Microbial inoculation in drought challenged rice triggered multipronged steps at enzymatic, non- enzymatic and gene expression level. these multifarious modulations in plants were related to stress tolerance mechanisms. Drought suppressed growth of rice plants but inoculation with Trichoderma, Pseudomonas and their combination minimized the impact of watering regime. induced PAL gene expression a…	Rejected	No acdS expression
ACC-deaminase' + ' gene expression' + 'drought stress' + 'plants' +'PGPR'	Google Scholar	Control of Drought Stress in Wheat Using Plant-Growth- Promoting Bacteria	Kasim et al., 2013	Abiotic stress conditions are the main limiting factors for crop cultivation around the world. In the present study we aimed to improve wheat growth under drought stress conditions through priming with beneficial bacteria considered as plant-growth promoting bacteria (PGPB). Two bacterial strains, Bacillus amyloliquefaciens 5113 and Azospirillum brasilense NO40, were used to prime the wheat cv. S…	Rejected	No acdS expression
ACC-deaminase' + ' gene expression' + 'drought stress' + 'plants' +'PGPR'	Google Scholar	Isolation and Characterization of Halotolerant Plant Growth Promoting Rhizobacteria From Durum Wheat (Triticum turgidum subsp. durum) Cultivated in Saline Areas of the Dead Sea Region	Albdaiwi et al., 2019	Plant growth promoting rhizobacteria (PGPR) are beneficial microorganisms that can be utilized to improve plant responses against biotic and abiotic stresses. In this study, 74 halotolerant bacterial isolates were isolated from rhizosphere and endorhizosphere of durum wheat (Triticum turgidum subsp. durum) plants cultivated in saline environments in the Ghor region near the east of the Dead Sea. …	Rejected	No drought stress
ACC-deaminase' + ' gene expression' + 'drought stress' + 'plants' +'PGPR'	Google Scholar	Whole Genome Sequencing and Analysis of Plant Growth Promoting Bacteria Isolated from the Rhizosphere of Plantation Crops Coconut, Cocoa and Arecanut	Gupta et al., 2014	Coconut, cocoa and arecanut are commercial plantation crops that play a vital role in the Indian economy while sustaining the livelihood of more than 10 million Indians. According to 2012 Food and Agricultural organization’s report, India is the third largest producer of coconut and it dominates the production of arecanut worldwide. In this study, three Plant Growth Promoting Rhizobacteria (PGPR)…	Rejected	Phylogenesis study
ACC-deaminase' + ' gene expression' + 'drought stress' + 'plants' +'PGPR'	Google Scholar	Evaluation of Candidate Reference Genes for Gene Expression Normalization in Brassica juncea Using Real Time Quantitative RT-PCR	Chandna et al.,2012	The real time quantitative reverse transcription PCR (qRT-PCR) is becoming increasingly important to gain insight into function of genes. Given the increased sensitivity, ease and reproducibility of qRT-PCR, the requirement of suitable reference genes for normalization has become important and stringent. It is now known that the expression of internal control genes in living organism vary conside…	Rejected	Phylogenesis study
ACC-deaminase' + ' gene expression' + 'drought stress' + 'plants' +'PGPR'	Google Scholar	Regulation of antioxidant production, ion uptake and productivity in potato (Solanum tuberosum L.) plant inoculated with growth promoting salt tolerant Bacillus strains	Tahir et al., 2019	The exchangeable sodium (Na+) in salt affected soils is a major constraint in potassium (K+) availability to plants that disturb ion transport and inhibit plant growth, adversely. Salt tolerant plant growth promoting rhizobacteria (PGPR) may regulate the Na+/K+ efflux and increase K+ uptake by the plant from the soil. Therefore, a pot study was performed to examine the effect of salt tolerant PGP…	Rejected	Proteomic study
ACC-deaminase' + ' gene expression' + 'drought stress' + 'plants' +'PGPR'	Google Scholar	Pseudomonas putida modulates the expression of miRNAs and their target genes in response to drought and salt stresses in chickpea (Cicer arietinum L.)	Jatan et al., 2019	MicroRNAs are small non-coding regulatory RNA molecules that play an important role in the modulation of gene expression during various environmental stresses. Pseudomonas putida RA, a plant growth promoting rhi- zobacteria (PGPR) colonizes the root surface of plants improving their growth and development during abiotic stresses modulating the expression of stress-responsive genes; however, the i…	Rejected	No acdS expression
ACC-deaminase' + ' gene expression' + 'drought stress' + 'plants' +'PGPR'	Google Scholar	Growth behavior of tomato (Solanum lycopersicum L.) under drought stress in the presence of silicon and plant growth promoting rhizobacteria	Ullah et al., 2016	Among abiotic stresses, drought is considered as the most important growth limiting factor, particularly in arid and semiarid regions. Plant tolerance to drought is mainly associated with the maintenance of plant water status either by reducing water loss through decreasing transpiration or improving plant root capacity to extract more water through osmotic adjustment. In this regard, adequate re…	Rejected	Proteomic study
ACC-deaminase' + ' gene expression' + 'drought stress' + 'plants' +'PGPR'	Google Scholar	Transcriptomic profiling of maize (Zea mays L.) seedlings in response to Pseudomonas putida stain FBKV2 inoculation under drought stress	SkZ et al., 2018	Several mechanisms have been proposed for plant growth-promoting rhizobacteria (PGPR)-mediated drought stress tolerance in plants, but little is known about the molecular pathways involved in the drought tolerance promoted by PGPR. We, therefore, aim to study the differential gene response between Pseudomonas putida strain FBKV2 and maize interaction under drought stress using Illumina sequencing…	Rejected	Proteomic study
ACC-deaminase' + ' gene expression' + 'drought stress' + 'plants' +'PGPR'	Google Scholar	Plant growth-promoting rhizobacterium Pseudomonas PS01 induces salt tolerance in Arabidopsis thaliana	Chu et al., 2019	Objectives: Plant growth-promoting rhizobacteria (PGPR) may contribute to sustainable crop production by improv- ing plant growth and/or plant tolerance to abiotic stresses. Soil salinity, which limits the productivity of crop plants, is one of the major concerns of modern agriculture, especially in countries heavily affected by climate change as Vietnam. Currently, only a few reports have studie…	Rejected	No acdS expression
ACC-deaminase' + ' gene expression' + 'drought stress' + 'plants' +'PGPR'	Google Scholar	Root inoculation with Azotobacter chroococcum 76A enhances tomato plants adaptation to salt stress under low N conditions	Van Oosten et al., 2018	Background: The emerging roles of rhizobacteria in improving plant nutrition and stress protection have great potential for sustainable use in saline soils. We evaluated the function of the salt-tolerant strain Azotobacter chroococcum 76A as stress protectant in an important horticultural crop, tomato. Specifically we hypothesized that treatment of tomato plants with A. chroococcum 76A could impr…	Rejected	No acdS expression
ACC-deaminase' + ' gene expression' + 'drought stress' + 'plants' +'PGPR'	Google Scholar	Alleviation of Salt Stress in Pepper (Capsicum annum L.) Plants by Plant Growth-Promoting Rhizobacteria	Hahm et al., 2017	In the present study, we demonstrate that the growth of salt-stressed pepper plants is improved by inoculation with plant growth-promoting rhizobacteria (PGPR). Three PGPR strains (Microbacterium oleivorans KNUC7074, Brevibacterium iodinum KNUC7183, and Rhizobium massiliae KNUC7586) were isolated from the rhizosphere of pepper plants growing in saline soil, and pepper plants inoculated with these…	Rejected	Proteomic study
ACC-deaminase' + ' gene expression' + 'drought stress' + 'plants' +'PGPR'	Google Scholar	Psychrotolerant bacteria isolated from the leaf apoplast of cold-adapted wild plants improve the cold resistance of bean (Phaseolus vulgaris L.) under low temperature	Tiryaki et al., 2019	We have isolated psychrotolerant bacteria from the leaf apoplast of cold-adapted wild plants and aimed to investigate their effect on the cold resistance of bean (Phaseolus vulgaris L.). Based on the findings of 16S rRNA gene sequence analysis, 20 isolates belonging to 5 bacteria species (Pseudomonas fragi, P. chloropaphis, P. fluorescens, P. proteolytica and Brevibacterium frigoritolerans) were …	Rejected	Proteomic study
ACC-deaminase' + ' gene expression' + 'drought stress' + 'plants' +'PGPR'	Google Scholar	Isolation and characterization of halotolerant bacilli from chickpea (Cicer arietinum L.) rhizosphere for plant growth promotion and biocontrol traits	Sharma et al., 2019	The present study describes the identification and polyphasic characterization of salt tolerant bacilli displaying plant growth promoting and broad spectrum antifungal activities. A total of 110 strains were isolated, out of which nine were selected on the basis of halotolerance, in vitro plant growth promoting attributes and antagonism against multiple phytopathogens. Pre- liminary identificatio…	Rejected	Proteomic study
ACC-deaminase' + ' gene expression' + 'drought stress' + 'plants' +'PGPR'	Google Scholar	Biodiversity and plant growth promoting traits of culturable endophytic actinobacteria associated with Jatropha curcas L. growing in Panxi dry-hot valley soil	Qin et al., 2015		Rejected	Duplicate
ACC-deaminase' + ' gene expression' + 'drought stress' + 'plants' +'PGPR'	Google Scholar	Rhizosphere bacteria containing 1-aminocyclopropane-1- carboxylate deaminase increase growth and photosynthesis of pea plants under salt stress by limiting Na+ accumulation	Wang et al., 2016		Rejected	Duplicate
ACC-deaminase' + ' gene expression' + 'drought stress' + 'plants' +'PGPR'	Google Scholar	Rhizobacteria that produce auxins and contain 1-amino-cyclopropane-1-carboxylic acid deaminase decrease amino acid concentrations in the rhizosphere and improve growth and yield of well-watered and water-limited potato (Solanum tuberosum)	Belimov et al., 2015	Plant-growth-promoting rhizobacteria (PGPR) utilise amino acids exuded from plant root systems, but hitherto there have been no direct measurements of rhi- zosphere concentrations of the amino acid 1-amino-cyclopropane-1-carboxylic acid (ACC) following inoculation with PGPR containing the enzyme ACC deaminase. When introduced to the rhizosphere of two potato (Solanum tubero- sum) cultivars (cv. S…	Rejected	Proteomic study
ACC-deaminase' + ' gene expression' + 'drought stress' + 'plants' +'PGPR'	Google Scholar	Halophilic rhizobacteria from Distichlis spicata promote growth and improve salt tolerance in heterologous plant hosts	Palacio-Rodríguez et al.,2017	Rhizobacteria are central components of the plant microbiome and influence root development and function. Desciphering how rhizobacteria contribute to plant performance under adverse environments is a major research challenge. The aims of the present study were to isolate and char- acterize rhizobacteria from the halophilic grass Distichlis spicata and to test their possible growth promoting and …	Rejected	No drought stress
ACC-deaminase' + ' gene expression' + 'drought stress' + 'plants' +'PGPR'	Google Scholar	Microbial Diversity of Psychrotolerant Bacteria Isolated from Wild Flora of Andes Mountains and Patagonia of Chile towards the Selection of Plant Growth-Promoting Bacterial Consortia to Alleviate Cold Stress in Plants	Vega-Celedón et al., 2021	Cold stress decreases the growth and productivity of agricultural crops. Psychrotolerant plant growth-promoting bacteria (PGPB) may protect and promote plant growth at low temperatures. The aims of this study were to isolate and characterize psychrotolerant PGPB from wild flora of Andes Mountains and Patagonia of Chile and to formulate PGPB consortia. Psychrotolerant strains were isolated from 11…	Rejected	No drought stress
ACC-deaminase' + ' gene expression' + 'drought stress' + 'plants' +'PGPR'	Google Scholar	Drought-tolerant plant growth-promoting rhizobacteria isolated from jujube (Ziziphus jujuba) and their potential to enhance drought tolerance	Zhang et al., 2020	Background and aims Plant growth-promoting rhizobacteria (PGPR) have important roles in improving plant growth and alleviating stress induced damage under drought stress conditions. The aims of this study are: 1) to isolate and identify drought-tolerant PGPR from rhizosphere soil of jujube, a drought-tolerant plant grown in semi-arid and arid regions; and 2) to evaluate the effects of inoculation…	accepted
ACC-deaminase' + ' gene expression' + 'drought stress' + 'plants' +'PGPR'	Google Scholar	PGPR-Mediated Salt Tolerance in Maize by Modulating Plant Physiology, Antioxidant Defense, Compatible Solutes Accumulation and Bio-Surfactant Producing Genes	Ali et al., 2021	Salinity stress is a barrier to crop production, quality yield, and sustainable agriculture. The current study investigated the plant growth promotion, biochemical and molecular characterization of bacterial strain Enterobacter cloacae PM23 under salinity stress (i.e., 0, 300, 600, and 900 mM). E. cloacae PM23 showed tolerance of up to 3 M NaCl when subjected to salinity stress. Antibiotic- resis…	Rejected	Proteomic study
ACC-deaminase' + ' gene expression' + 'drought stress' + 'plants' +'PGPR'	Google Scholar	Pseudomonas veronii KJ mitigates flood stress-associated damage in Sesamum indicum L.	Ali et al.,2018	Physiological characteristics of terrestrial plants are severely affected by waterlogging stress, leading to low photochemical efficiency of leaves and retarded growth and development. Plant growth-promoting rhizobacteria contain the acdS gene, which encodes for the enzyme 1-aminocyclopropane-1-carboxylate (ACC) deaminase. ACC deaminase cleaves the substrate ACC to produce a- ketobutyrate and amm…	Rejected	Proteomic study
ACC-deaminase' + ' gene expression' + 'drought stress' + 'plants' +'PGPR'	Google Scholar	Bacillus mycoides PM35 Reinforces Photosynthetic Efficiency, Antioxidant Defense, Expression of Stress-Responsive Genes, and Ameliorates the Effects of Salinity Stress in Maize	Ali et al., 2022	Soil salinity is one of the abiotic constraints that imbalance nutrient acquisition, hampers plant growth, and leads to potential loss in agricultural productivity. Salt-tolerant plant growth- promoting rhizobacteria (PGPR) can alleviate the adverse impacts of salt stress by mediating molec- ular, biochemical, and physiological status. In the present study, the bacterium Bacillus mycoides PM35 sh…	Rejected	Proteomic study
ACC-deaminase' + ' gene expression' + 'drought stress' + 'plants' +'PGPR'	Google Scholar	Probiotics and Plant Health	Kumar et al., 2017		Rejected	Book
ACC-deaminase' + ' gene expression' + 'drought stress' + 'plants' +'PGPR'	Google Scholar	Microbial Interventions in Agriculture and Environment	Singh et al., 2019		Rejected	Book
ACC-deaminase' + ' gene expression' + 'drought stress' + 'plants' +'PGPR'	Google Scholar	Microbiome in Plant Health and Disease	Kumar et al., 2019		Rejected	Book
ACC-deaminase' + ' gene expression' + 'drought stress' + 'plants' +'PGPR'	Google Scholar	Plant Growth Promoting Rhizobacteria for Sustainable Stress Management	Sayyed et al., 2019		Rejected	Book
ACC-deaminase' + ' gene expression' + 'drought stress' + 'plants' +'PGPR'	Google Scholar	Plant Stress Biology Strategies and Trends	Giri-Sharma, 2019		Rejected	Book
ACC-deaminase' + ' gene expression' + 'drought stress' + 'plants' +'PGPR'	Google Scholar	Rhizosphere Microbes Soil and Plant Functions	Sharma et al., 2020		Rejected	Book
ACC-deaminase' + ' gene expression' + 'drought stress' + 'plants' +'PGPR'	Google Scholar	Microbial Metatranscriptomics Belowground	Nath et al., 2021		Rejected	Book
ACC-deaminase' + ' gene expression' + 'drought stress' + 'plants' +'PGPR'	Google Scholar	The Date Palm Genome, Vol. 2 Omics and Molecular Breeding	Al-Khayri et al., 2021		Rejected	Book
ACC-deaminase' + ' gene expression' + 'drought stress' + 'plants' +'PGPR'	Google Scholar	Microbiome in Plant Health and Disease Challenges and Opportunities	Kumar et al., 2019		Rejected	Duplicate
ACC-deaminase' + ' gene expression' + 'drought stress' + 'plants' +'PGPR'	Google Scholar	Streptomyces alleviate drought stress in tomato plants and modulate the expression of transcription factors ERF1 and WRKY70 genes	Abbasi et al., 2020	Application of PGPRs that are tolerant to abiotic stresses is a promising approach to reduce the negative effects of drought stress and increase crop production. This study was designed to select and evaluate stress-tolerance PGP Streptomyces strains based on in vitro and in vivo experiments. Our results showed that only a small percentage (14 %) of 107 Streptomyces can produce ACCD. The effect o…	Rejected	Proteomic study
ACC-deaminase' + ' gene expression' + 'drought stress' + 'plants' +'PGPR'	Google Scholar	Role of Functional Bacterial Phylum Proteobacteria in Glycine max Growth Promotion Under Abiotic Stress: A Glimpse on Case Study	Vaishnav, 2018		Rejected	Book chapter
ACC-deaminase' + ' gene expression' + 'drought stress' + 'plants' +'PGPR'	Google Scholar	Biofertilizers for Sustainable Agriculture and Environment	Giri et al., 2019		Rejected	Book
ACC-deaminase' + ' gene expression' + 'drought stress' + 'plants' +'PGPR'	Google Scholar	Role of Microorganisms in Alleviation of Abiotic Stresses for Sustainable Agriculture	Chakraborty et al.,2015		Rejected	Book chapter
ACC-deaminase' + ' gene expression' + 'drought stress' + 'plants' +'PGPR'	Google Scholar	Bacterial-Mediated Tolerance and Resistance to Plants Under Abiotic and Biotic Stresses	Choudhary et al., 2016	Plant growth-promoting bacteria (PGPB) are capable of alleviating environmental stress and eliciting tolerance in plants to promote their growth. Several PGPB elicit physical and/or chemical changes related to plant defense in the form of induced systemic resistance (ISR) under biotic stress. Researchers emphasized that PGPB- elicited ISR has suppressed plant diseases caused by a range of pathoge…	Rejected	review
ACC-deaminase' + ' gene expression' + 'drought stress' + 'plants' +'PGPR'	Google Scholar	Review on Drought Tolerance in Plants Induced by Plant Growth Promoting Rhizobacteria	Dar et al., 2018	Abiotic stresses are major constrains which adversely affect the plant growth and productivity. Among all abiotic stresses, drought is considered as one of the major constraints on agricultural productivity worldwide and is likely to further increase. Hence the need of the hour is to formulate the strategies that can minimize the loss in crop production under drought conditions. One of them being…	Rejected	review
ACC-deaminase' + ' gene expression' + 'drought stress' + 'plants' +'PGPR'	Google Scholar	Plant growth-promoting bacteria as inoculants in agricultural soils	de Souza et al., 2015	Plant-microbe interactions in the rhizosphere are the determinants of plant health, productivity and soil fertility. Plant growth-promoting bacteria (PGPB) are bacteria that can enhance plant growth and protect plants from disease and abiotic stresses through a wide variety of mechanisms; those that establish close associations with plants, such as the endophytes, could be more successful in plan…	Rejected	review
ACC-deaminase' + ' gene expression' + 'drought stress' + 'plants' +'PGPR'	Google Scholar	Plant-Endophyte Interaction and Its Application to Abiotic Stress Management of Crop Plants	Dey et al., 2019	Endophytes are microorganisms mostly bacteria and fungi that lives partially or completely its life cycle inside living plant tissue without causing adverse negative symptoms. Endophytes play a major role in structuring shaping processes of plant such as colonization, competition, coexistence and soil nutrient dynamics. Some endophytes promote growth of their host plants by enhancing the host‟s a…	Rejected	review
ACC-deaminase' + ' gene expression' + 'drought stress' + 'plants' +'PGPR'	Google Scholar	Microbial enhancement of crop resource use efficiency	Dodd et al., 2012	Naturally occurring soil microbes may be used as inoculants to maintain crop yields despite decreased resource (water and nutrient) inputs. Plant symbiotic relationships with mycorrhizal fungi alter root aquaporin gene expression and greatly increase the surface area over which plant root systems take up water and nutrients. Soil bacteria on the root surface alter root phytohormone status thereby…	Rejected	review
ACC-deaminase' + ' gene expression' + 'drought stress' + 'plants' +'PGPR'	Google Scholar	The influence of plant growth-promoting rhizobacteria in plant tolerance to abiotic stress: a survival strategy	Enebe-Babalola,2018	Action is needed to face the global threat arising from inconsistent rainfall, rise in temperature, and salinization of farm lands which may be the product of climate change. As crops are adversely affected, man and animals may face famine. Plants are severely affected by abiotic stress (drought, salinity, alkalinity, and temperature), which impairs yield and results in loss to farmers and to the…	Rejected	review
ACC-deaminase' + ' gene expression' + 'drought stress' + 'plants' +'PGPR'	Google Scholar	Potential role of phytohormones and plant growth-promoting rhizobacteria in abiotic stresses: consequences for changing environment	Fahad et al.,2015	Plants are sessile beings, so the need of mechanisms to flee from unfavorable circumstances has provided the development of unique and sophisticated responses to environmental stresses. Depending on the degree of plasticity, many morphological, cellular, anatomical, and physiological changes occur in plants in response to abiotic stress. Phyto- hormones are small molecules that play critical role…	Rejected	review
ACC-deaminase' + ' gene expression' + 'drought stress' + 'plants' +'PGPR'	Google Scholar	EFFECT OF 1-AMINOCYCLOPROPANE-1-CARBOXYLIC ACID DEAMINASE PRODUCING FLUORESCENT PSEUDOMONAS ON THE GROWTH OF EGGPLANT UNDER DROUGHT STRESS	Fathalla et al., 2020	The aim of this research is to evaluate the effect on inoculated eggplants with two different Pseudomonas strains which contain the enzyme ACCD under water deficit stress conditions. Both the strains Pseudomonas putida SAB10 and Pseudomonas palleroniana SAW21 have showed The ACC deaminase gene (acdS) in the PCR amplification of that gene. In the present study two pre-isolated strains of fluoresce…	Rejected	Proteomic study
ACC-deaminase' + ' gene expression' + 'drought stress' + 'plants' +'PGPR'	Google Scholar	The Interaction Between Plants and Bacterial Endophytes Under Salinity Stress	Fouda, 2019		Rejected	Book chapter
ACC-deaminase' + ' gene expression' + 'drought stress' + 'plants' +'PGPR'	Google Scholar	Tomato tolerance to abiotic stress: a review of most often engineered target sequences	Gerszberg et al.,2017	Tomato is one of the most often cultivated vegetable species worldwide. Due to the anti-oxidative and anti-cancer properties of lycopene, tomato consumption as well as production is still increasing. However, its productivity is impaired by a wide range of abiotic stresses, and the establishment of stress-tolerant crops is a key challenge for agricultural biotechnology. Until now, a few genetic a…	Rejected	review
ACC-deaminase' + ' gene expression' + 'drought stress' + 'plants' +'PGPR'	Google Scholar	The Use of ACC Deaminase-ContainingPlant Growth-Promoting Bacteria to Protect Plants Against the Deleterious Effects of Ethylene	Glick et al., 2008		Rejected	Book chapter
ACC-deaminase' + ' gene expression' + 'drought stress' + 'plants' +'PGPR'	Google Scholar	MAKING PHYTOREMEDIATION WORK BETTER: MAXIMIZING A PLANT’S GROWTH POTENTIAL IN THE MIDST OF ADVERSITY	Glick et al., 2011	While a number of different plants can either breakdown a variety of organic contaminants or hyperaccumulate metals from the environment, even the most efficient of those plants is typically inhibited by the presence of the toxicant(s). The plant stress that is induced by the presence of various environmental toxicants typically limits a plant’s growth and ultimately its ability to phytoremediate…	Rejected	review
ACC-deaminase' + ' gene expression' + 'drought stress' + 'plants' +'PGPR'	Google Scholar	Pseudomonas 1-aminocyclopropane-1-carboxylate (ACC) Deaminase and Its Role in Beneficial Plant-Microbe Interactions	Glick et al., 2021	The expression of the enzyme 1-aminocylopropane-1-carboxylate (ACC) deaminase, and the consequent modulation of plant ACC and ethylene concentrations, is one of the most important features of plant-associated bacteria. By decreasing plant ACC and ethylene concentrations, ACC deaminase-producing bacteria can overcome some of the deleterious effects of inhibitory levels of ACC and ethylene in vario…	Rejected	review
ACC-deaminase' + ' gene expression' + 'drought stress' + 'plants' +'PGPR'	Google Scholar	Plant growthepromoting rhizobacteria and their functional role in salinity stress management	Gupta et al., 2020		Rejected	Book chapter
ACC-deaminase' + ' gene expression' + 'drought stress' + 'plants' +'PGPR'	Google Scholar	Agriculture biotechnology for management of multiple biotic and abiotic environmental stress in crops	Haggag et al., 2015	In current situation where dramatic changes in the environmental conditions are very common finding the alternate options in increasing crop productivity is main area that needs to be emphasized to feed the overwhelming populations and ensure their food security. Among environmental conditions like various biotic and abiotic stresses are playing major role in decreasing crop productivity. Abiotic…	Rejected	review
ACC-deaminase' + ' gene expression' + 'drought stress' + 'plants' +'PGPR'	Google Scholar	Properties of bacterial endophytes and their proposed role in plant growth	Hardoim et al., 2008	Bacterial endophytes live inside plants for at least part of their life cycle. Studies of the interaction of endophytes with their host plants and their function within their hosts are important to address the ecological relevance of endophytes. The modulation of ethylene levels in plants by bacterially produced 1-aminocyclopropane-1- carboxylate deaminase is a key trait that enables interference…	Rejected	review
ACC-deaminase' + ' gene expression' + 'drought stress' + 'plants' +'PGPR'	Google Scholar	Interactions between plants and soil shaping the root microbiome under abiotic stress	Hartman et al., 2016	Plants growing in soil develop close associations with soil microorganisms, which inhabit the areas around, on, and inside their roots. These microbial communities and their asso- ciated genes — collectively termed the root microbiome — are diverse and have been shown to play an important role in conferring abiotic stress tolerance to their plant hosts. In light of growing concerns over the threa…	Rejected	review
ACC-deaminase' + ' gene expression' + 'drought stress' + 'plants' +'PGPR'	Google Scholar	Plant Growth Promotion and Induction of Systemic Tolerance to Drought and Salt Stress of Plants by Quorum Sensing Auto-Inducers of the N-acyl-homoserine Lactone Type: Recent Developments	Hartmann et al., 2021		Rejected	review
ACC-deaminase' + ' gene expression' + 'drought stress' + 'plants' +'PGPR'	Google Scholar	Plant-beneficial effects of Trichoderma and of its genes	Hermosa et al., 2012	Trichoderma (teleomorph Hypocrea) is a fungal genus found in many ecosystems. Trichoderma spp. can reduce the severity of plant diseases by inhibiting plant pathogens in the soil through their highly potent antagonistic and mycoparasitic activity. Moreover, as revealed by research in recent decades, some Trichoderma strains can interact directly with roots, increasing plant growth potential, resi…	Rejected	Review
ACC-deaminase' + ' gene expression' + 'drought stress' + 'plants' +'PGPR'	Google Scholar	The role of soil microorganisms in plant adaptation to abiotic stresses: Current scenario and future perspectives	Hossain et al., 2022		Rejected	Book chapter
ACC-deaminase' + ' gene expression' + 'drought stress' + 'plants' +'PGPR'	Google Scholar	Prospective Use of 1-Aminocyclopropane-1-Carboxylate Deaminase-Producing Bacteria for Plant Growth Promotion and Defense against Biotic and Abiotic Stresses in Peat-Soil-Agriculture	Husen et al., 2008	The 1-aminocyclopropane-1-carboxylate (ACC) deaminase (EC4.1.99.4) is an enzyme produced by some soil bacteria to degrade ACC (the immediate precursor of ethylene) to reduce ethylene biosynthesis in higher plants. Increased concentrations of ethylene in plant tissues, which are triggered by various biotic and abiotic stresses, inhibits plant growth and weakens the plant defense against the stress…	Rejected	review
ACC-deaminase' + ' gene expression' + 'drought stress' + 'plants' +'PGPR'	Google Scholar	Plant Growth Promoting Rhizobacteria in Amelioration of Salinity Stress: A Systems Biology Perspective	Ilangumaran et al., 2017.	Salinity affects plant growth and is a major abiotic stress that limits crop productivity. It is well-understood that environmental adaptations and genetic traits regulate salinity tolerance in plants, but imparting the knowledge gained towards crop improvement remain arduous. Harnessing the potential of beneficial microorganisms present in the rhizosphere is an alternative strategy for improving…	Rejected	review
ACC-deaminase' + ' gene expression' + 'drought stress' + 'plants' +'PGPR'	Google Scholar	Bacilli in Climate Resilient Agriculture and Bioprospecting	Islam et al., 2019		Rejected	Book chapter
ACC-deaminase' + ' gene expression' + 'drought stress' + 'plants' +'PGPR'	Google Scholar	Rhizomicrobiome – A Biological Software to Augment Soil Fertility and Plant Induced Systemic Tolerance Under Abiotic Stress	Jeganetal et al.,2016	The rhizomicrobiome plays a vital role in maintaining plant health and is highly influenced by the root exudates of the host plant. Plants select a subset of microbes at different stages of their development, and determine the microbiome community composition in its immediate vicinity presumably for specific functions. The rhizomicrobiome is composed of diversified microbial community with specif…	Rejected	review
ACC-deaminase' + ' gene expression' + 'drought stress' + 'plants' +'PGPR'	Google Scholar	Engineering abiotic stress response in plants for biomass production	Joshi et al., 2018	One of the major challenges in today’s agriculture is to achieve enhanced plant growth and biomass even under adverse envi- ronmental conditions. Recent advancements in genetics and molecular biology have enabled the identification of a complex signaling network contributing toward plant growth and devel- opment on the one hand and abiotic stress response on the other hand. As an outcome of these…	Rejected	review
ACC-deaminase' + ' gene expression' + 'drought stress' + 'plants' +'PGPR'	Google Scholar	Isolation of Rhizobacteria from Jatropha curcas and characterization of produced ACC deaminase	Jha et al., 2012	Decreased levels of ACC (1-aminocyclopropane-1-carboxylic acid) result in lower levels of endo- genous ethylene, which eliminate the potentially inhibitory effects of stress-induced higher ethylene concentrations. It is worth noting the substantial ability of the bacterial species to colonize different environments, including taxonomically distinct plants cultivated in distantly separated geograp…	Rejected	review
ACC-deaminase' + ' gene expression' + 'drought stress' + 'plants' +'PGPR'	Google Scholar	Use of Plant Growth-Promoting Rhizobacteria to Control Stress Responses of Plant Roots	Kang et al.,2010	Ethylene is a key gaseous hormone that controls various physiological processes in plants including growth, senescence, fruit ripening, and responses to abiotic and biotic stresses. In spite of some of these positive effects, the gas usually inhibits plant growth. While chemical fertilizers help plants grow better by providing soil-limited nutrients such as nitrogen and phosphate, over- usage oft…	Rifiutato	review
ACC-deaminase' + ' gene expression' + 'drought stress' + 'plants' +'PGPR'	Google Scholar	soil amendments with ethylene precursor alleviate negative impacts of salinity on soil microbial properties and productivity	Liu et al., 2019	some microbes enhance stress tolerance in plants by minimizing plant ethylene levels via degradation of its immediate precursor, 1-aminocyclopropane-1-carboxylate (ACC), in the rhizosphere. In return, ACC is used by these microbes as a source of nitrogen. This mutualistic relationship between plants and microbes may be used to promote soil properties in stressful environments. In this study, we t…	Rejected	No drought stress
ACC-deaminase' + ' gene expression' + 'drought stress' + 'plants' +'PGPR'	Google Scholar	Formulation of biofertilizer for improving growth and yield of wheat in rain dependent farming system	Bangash et al., 2021	Low and erratic rainfall can cause a significant reduction in crop yields in agriculture systems that rely exclusively on rain water. Some plant growth promoting rhizobacteria (PGPR) capable of producing 1-aminocyclopropane-1-carboxylic acid (ACC) deaminase can mitigate the negative impact of water stress on plant in rainfed agriculture through modulation of plant stress hormone ethylene. The pre…	Rejected	No abiotic stress
ACC-deaminase' + ' gene expression' + 'drought stress' + 'plants' +'PGPR'	Google Scholar	Antimony-oxidizing bacteria alleviate Sb stress in Arabidopsis by attenuating Sb toxicity and reducing Sb uptake	Gu et al., 2020	Aims Antimony (Sb)-oxidizing bacteria play an impor- tant role in Sb biogeochemical cycle in soil, but the benefits of microbial oxidation for plants have not been well documented. The aim of this study was to explore the contribution of Sb(III)-oxidizing bacteria to alleviate the Sb toxicity in plants. Methods The plant growth-promoting (PGP) characteristics of Sb(III)-oxidizing bacterium Bacill…	Rejected	Proteomic study
ACC-deaminase' + ' gene expression' + 'drought stress' + 'plants' +'PGPR'	Google Scholar	Comparative Analysis of 1-aminocyclopropane-1-carboxylate (ACC) Deaminase in Selected Plant Growth Promoting Rhizobacteria (PGPR)	Singh et al., 2015	1-aminocyclopropane-1-carboxylate (ACC) deaminase promotes plant growth by sequestering and cleaving the ethylene precursor ACC to α-ketobutyrate and ammonium. Many plant growth promoting rhizobacteria producing 1-aminocyclopropane-1-carboxylate (ACC) deaminase as a source of nitrogen has an eminent role in plant nutrition. In this work to perform comparative proteomics analysis of ACCD producing…	Rejected	Proteomic study
ACC-deaminase' + ' gene expression' + 'drought stress' + 'plants' +'PGPR'	Google Scholar	Insights into the Interactions among Roots, Rhizosphere, and Rhizobacteria for Improving Plant Growth and Tolerance to Abiotic Stresses: A Review	Khan et al., 2021	Abiotic stresses, such as drought, salinity, heavy metals, variations in temperature, and ultraviolet (UV) radiation, are antagonistic to plant growth and development, resulting in an overall decrease in plant yield. These stresses have direct effects on the rhizosphere, thus severely affect the root growth, and thereby affecting the overall plant growth, health, and productivity. How- ever, the …	Rejected	review
ACC-deaminase' + ' gene expression' + 'drought stress' + 'plants' +'PGPR'	Google Scholar	Field Crops: Sustainable Management by PGPR	Maheshwari et al., 2019		Rejected	Book
ACC-deaminase' + ' gene expression' + 'drought stress' + 'plants' +'PGPR'	Google Scholar	Crosstalk amongst phytohormones from planta and PGPR under biotic and abiotic stresses	Khan et al.,2020	Phytohormones are endogenously produced organic substances indispensable for regulating plant growth and yield and also play major role in inducing tolerance to plants against various biotic and abiotic stresses. The convergence points among hormone signal transduction cascades are considered as cross-talk which are crucial for plant development as well as for plant responses to biotic and abioti…	Rejected	review
ACC-deaminase' + ' gene expression' + 'drought stress' + 'plants' +'PGPR'	Google Scholar	Plant Growth Promoting Rhizobacteria for Sustainable Stress Management	Kour et al., 2019		Rejected	Book
ACC-deaminase' + ' gene expression' + 'drought stress' + 'plants' +'PGPR'	Google Scholar	Plant Growth-Promoting Bacteria: Biological Tools for the Mitigation of Salinity Stress in Plants	Kumar et al., 2016	Salinity stress is one of the major abiotic stresses threatening sustainable crop production worldwide. The extent of salinity affected area is expected to cover about 50% of total agricultural land by 2050. Salinity stress produces various detrimental effects on plants’ physiological, biochemical, and molecular features and reduces productivity. The poor plant growth under salinity stress is due…	Rejected	review
ACC-deaminase' + ' gene expression' + 'drought stress' + 'plants' +'PGPR'	Google Scholar	The Role of Rhizosphere Microorganisms Containing the Abiotic Stress Tolerance in Plants	Kumar et al., 2018	Rhizosphere can be defined as the region extending a few However, future commercially available millimetres from the root surface in which the microbial population of soil is influenced by the chemical activities of plant biocontrol agents should simultaneously provide cross-protection against various stress roots. A major characteristic of the rhizosphere is the release of organic compounds into…	Rejected	review
ACC-deaminase' + ' gene expression' + 'drought stress' + 'plants' +'PGPR'	Google Scholar	Recent advances of PGPR based approaches for stress tolerance in plants for sustainable agriculture	Kumar et al., 2019	The increasing worldwide population is a significant challenge for agricultural food production to feed the alarming rate of the growing world population. The enhancing community directly affected by several factors, including the limitation of agricultural land, environmental damage, and the number of biotic and abiotic stresses, which affect global food production. It is essential to increase a…	Rejected	review
ACC-deaminase' + ' gene expression' + 'drought stress' + 'plants' +'PGPR'	Google Scholar	Phyto-Microbiome in Stress Regulation	Kumar et al., 2020		Rejected	book
ACC-deaminase' + ' gene expression' + 'drought stress' + 'plants' +'PGPR'	Google Scholar	Wheat Production in Changing Environments Responses, Adaptation and Tolerance	Hasanuzzaman et al., 2019		Rejected	book
ACC-deaminase' + ' gene expression' + 'drought stress' + 'plants' +'PGPR'	Google Scholar	Plant Growth Promoting Rhizobacteria in Amelioration of Abiotic Stresses: A Functional Interplay and Prospective	Monteiro, 2021		Rejected	Book chapter
ACC-deaminase' + ' gene expression' + 'drought stress' + 'plants' +'PGPR'	Google Scholar	Plant Growth Promoting Rhizobacterial Mitigation of Drought Stress in Crop Plants: Implications for Sustainable Agriculture	Ojuederie et al., 2019	Abiotic stresses arising from climate change negates crop growth and yield, leading to food insecurity. Drought causes oxidative stress on plants, arising from excessive production of reactive oxygen species (ROS) due to inadequate CO2, which disrupts the photosynthetic machinery of plants. The use of conventional methods for the development of drought-tolerant crops is time-consuming, and the fu…	Rejected	review
ACC-deaminase' + ' gene expression' + 'drought stress' + 'plants' +'PGPR'	Google Scholar	Beneficial features of plant growth-promoting rhizobacteria for improving plant growth and health in challenging conditions: A methodical review	Oleńska et al., 2020	New eco-friendly approaches are required to improve plant biomass production. Beneficial plant growth- promoting (PGP) bacteria may be exploited as excellent and efficient biotechnological tools to improve plant growth in various – including stressful – environments. We present an overview of bacterial mechanisms which contribute to plant health, growth, and development. Plant growth promoting rh…	Rejected	review
ACC-deaminase' + ' gene expression' + 'drought stress' + 'plants' +'PGPR'	Google Scholar	Plant Biotic Interactions State of the Art	Varma et al.,2019		Rejected	book
ACC-deaminase' + ' gene expression' + 'drought stress' + 'plants' +'PGPR'	Google Scholar	Recent Trends in PGPR Research for Sustainable Crop Productivity	Sayyed et al., 2016		Rejected	book
ACC-deaminase' + ' gene expression' + 'drought stress' + 'plants' +'PGPR'	Google Scholar	Genomics Improvement of Agronomic Crops to Abiotic Stress	Radwan 2015		Rejected	review
ACC-deaminase' + ' gene expression' + 'drought stress' + 'plants' +'PGPR'	Google Scholar	Role of plant-microbe interactions on abiotic stress tolerance in plants: A review	Rai et al., 2019	Plants are continuously exposed to a wide array of environmental stresses. Abiotic stress is one of the foremost limiting factors that are responsible for low agricultural productivity. The incidence of extreme events like prolonged drought, salinity, intense rain and flooding, heat wave and frost damage, metal toxicities in problematic soils are increasing day by day under the scenario of changi…	Rejected	review
ACC-deaminase' + ' gene expression' + 'drought stress' + 'plants' +'PGPR'	Google Scholar	Brown gold of marginal soil: Plant growth promoting bacteria to overcome plant abiotic stress for agriculture, biofuels and carbon sequestration	Ramakrishna et al., 2020	Marginal land is defined as land with poor soil characteristics and low crop productivity with no potential for profit. Poor soil quality due to the presence of xenobiotics or climate change is of great concern. Sustainable food production with increasing population is a challenge which becomes more difficult due to poor soil quality. Marginal soil can be made productive with the use of Plant Gro…	Rejected	review
ACC-deaminase' + ' gene expression' + 'drought stress' + 'plants' +'PGPR'	Google Scholar	Plant Growth Promoting Rhizobacteria, Arbuscular Mycorrhizal Fungi and Their Synergistic Interactions to Counteract the Negative Effects of Saline Soil on Agriculture: Key Macromolecules and Mechanisms	Sagar et al., 2021	Soil saltiness is a noteworthy issue as it results in loss of profitability and development of agrarian harvests and decline in soil health. Microorganisms associated with plants contribute to their growth promotion and salinity tolerance by employing a multitude of macromolecules and pathways. Plant growth promoting rhizobacteria (PGPR) have an immediate impact on improving profitability based o…	Rejected	review
ACC-deaminase' + ' gene expression' + 'drought stress' + 'plants' +'PGPR'	Google Scholar	Plant–Rhizobacteria Interactions to Induce Biotic and Abiotic Stress Tolerance in Plants	Saxena et al., 2021.		Rejected	book chapter
ACC-deaminase' + ' gene expression' + 'drought stress' + 'plants' +'PGPR'	Google Scholar	Soil salinity: A serious environmental issue and plant growth promoting bacteria as one of the tools for its alleviation	Shrivastava et al., 2014	Salinity is one of the most brutal environmental factors limiting the productivity of crop plants because most of the crop plants are sensitive to salinity caused by high concentrations of salts in the soil, and the area of land affected by it is increasing day by day. For all important crops, aver- age yields are only a fraction – somewhere between 20% and 50% of record yields; these losses are …	Rejected	review
ACC-deaminase' + ' gene expression' + 'drought stress' + 'plants' +'PGPR'	Google Scholar	Soil salinity: A serious environmental issue and plant growth promoting bacteria as one of the tools for its alleviation	Shrivastava et al., 2014		Rejected	Duplicate
ACC-deaminase' + ' gene expression' + 'drought stress' + 'plants' +'PGPR'	Google Scholar	Interaction of plant growth promoting bacteria with tomato under abiotic stress: A review	Singh et al., 2018	Tomato is one of the most demanding/utilizable vegetable crops worldwide after potato. It is extensively cul- tivated throughout the tropics and sub-tropics around the world. However, certain climate change consequences like salinity, drought, and environmental pollutants particularly heavy metals etc., lead to low soil productivity. In fact, problem of salinity, drought and soil contamination ar…	Rejected	review
ACC-deaminase' + ' gene expression' + 'drought stress' + 'plants' +'PGPR'	Google Scholar	Role of Melatonin and Plant-Growth-Promoting Rhizobacteria in the Growth and Development of Plants	Asif et al., 2019	Melatonin is a tryptophan-based indole molecule found in primitive photo- synthetic bacteria to mammals. It performs different functions in plants like rhizogenesis, enhancing plant growth, seed germination, plant yield, biomass production, photosynthesis, circadian rhythm, and fruit ripening. In addition, one of the most significant attributes of melatonin is its antioxidant activity. Moreover, …	Rejected	review
ACC-deaminase' + ' gene expression' + 'drought stress' + 'plants' +'PGPR'	Google Scholar	Drought tolerance improvement in plants: an endophytic bacterial approach	Ullah et al.,2019	Climate change is a crucial issue among the serious emerging problems which got a global attention in the last few decades. With the climate change, worldwide crop production has been seriously affected by drought stress. In this regard, various technologies including traditional breeding and genetic engineering are used to cope with drought stress. However, the interactions between plants and en…	Rejected	review
ACC-deaminase' + ' gene expression' + 'drought stress' + 'plants' +'PGPR'	Google Scholar	Enhancement of drought stress tolerance in crops by plant growth promoting rhizobacteria	Vurukonda et al., 2016	Drought is one of the major constraints on agricultural productivity worldwide and is likely to further increase. Several adaptations and mitigation strategies are required to cope with drought stress. Plant growth promoting rhizobacteria (PGPR) could play a significant role in alleviation of drought stress in plants. These beneficial microorganisms colonize the rhizosphere/endo-rhizosphere of pl…	Rejected	review
ACC-deaminase' + ' gene expression' + 'drought stress' + 'plants' +'PGPR'	Google Scholar	Pseudomonas putida attunes morphophysiological, biochemical and molecular responses in Cicer arietinum L. during drought stress and recovery	Tiwari et al., 2016	Drought is one of the most important abiotic stresses that adversely affect plant growth and yield po- tential. However, some drought resistant rhizosphere competent bacteria are known to improve plant health and promote growth during abiotic stresses. Present study showed the role of Pseudomonas putida MTCC5279 (RA) in ameliorating drought stress on cv. BG-362 (desi) and cv. BG-1003 (kabuli) chi…	Rejected	Proteomic study
ACC-deaminase' + ' gene expression' + 'drought stress' + 'plants' +'PGPR'	Google Scholar	Microbial Strategies for Vegetable Production	Turan, 2017		Rejected	book
ACC-deaminase' + ' gene expression' + 'drought stress' + 'plants' +'PGPR'	Google Scholar	Plant–rhizobacteria interaction: Physiological implication for heavy metal stress in plants—A review	Upadhyay, 2011	Rhizobacteria are root-colonizing, non-pathogenic, and their association with the roots of plant improves productivity and tolerance of abiotic stress such as heavy metal toxicity. Inoculation against biotic stresses also increases tolerance against heavy metal toxicity. Rhizobacteria might also increase nutrient uptake from soils that prevents the uptake and accumulation of nitrates and phosphat…	Rejected	review
ACC-deaminase' + ' gene expression' + 'drought stress' + 'plants' +'PGPR'	Google Scholar	Molecular mechanisms in plant growth promoting bacteria (PGPR) to resist environmental stress in plants	Vandana et al., 2020		Rejected	Book chapter
ACC-deaminase' + ' gene expression' + 'drought stress' + 'plants' +'PGPR'	Google Scholar	Rhizobacteria: A Promising Tool for Drought Tolerance in Crop Plants	Verma et al., 2016	Abiotic stress mainly involved extreme environmental conditions like drought, salinity, cold, heat, pH etc. Such extreme conditions are likely to have direct inhibitory impact on plant growth and productivity. In the recent years plant-growth promoting rhizobacteria (PGPR) mediated enhancement in abiotic stress tolerance is gaining wide attention worldwide. Plant-growth promoting rhizobacteria (P…	Rejected	review
ACC-deaminase' + ' gene expression' + 'drought stress' + 'plants' +'PGPR'	Google Scholar	Rhizospheric Microbial Diversity: An Important Component for Abiotic Stress Management in Crop Plants Toward Sustainable Agriculture	Goyal et al., 2019		Rejected	book chapter
ACC-deaminase' + ' gene expression' + 'drought stress' + 'plants' +'PGPR'	Google Scholar	Seed Endophytes Biology and Biotechnology	Verma et al., 2019		Rejected	book
ACC-deaminase' + ' gene expression' + 'drought stress' + 'plants' +'PGPR'	Google Scholar	Antioxidants in Plant- Microbe Interaction	Singh et al., 2021		Rejected	book
ACC-deaminase' + ' gene expression' + 'drought stress' + 'plants' +'PGPR'	Google Scholar	Soil Microbiomes for Sustainable Agriculture Functional Annotation	Yadav et al., 2021		Rejected	book
ACC-deaminase' + ' gene expression' + 'drought stress' + 'plants' +'PGPR'	Google Scholar	A review on drought stress in plants: Implications, mitigation and the role of plant growth promoting rhizobacteria	Ahluwalia et al., 2021	Increasing population and subsequent food requirement puts a lot of onus on agriculture worldwide. However, agricultural output is constantly influenced by several factors such as small land holdings, lack of proper mechanization, and occurrence of several abiotic and biotic stresses. Drought stress is one such abiotic stress which causes major setbacks to agricultural productivity every year. Wa…	Rejected	review
ACC-deaminase' + ' gene expression' + 'drought stress' + 'plants' +'PGPR'	Google Scholar	Involvement of polyamines in plant response to abiotic stress	Alcázar et al.,2006	Environmental stresses are the major cause of crop loss worldwide. Polyamines are involved in plant stress responses. However, the precise role(s) of polyamine metabolism in these processes remain ill-defined. Transgenic approaches demonstrate that polyamines play essential roles in stress tolerance and open up the possibility to exploit this strategy to improve plant tolerance to multiple enviro…	Rejected	review
ACC-deaminase' + ' gene expression' + 'drought stress' + 'plants' +'PGPR'	Google Scholar	Plant Growth Promoting and Stress Mitigating Abilities of Soil Born Microorganisms	Ali and Xie, 2020	Abiotic stresses affect the plant growth in different ways and at different developmental stages that reduce the crop yields. The increasing world population continually demands more crop yields; therefore it is important to use low-cost technologies against abiotic stresses to increase crop productivity. Soil microorganisms survive in the soil associated with plants in extreme condition. It was …	Rejected	review
ACC-deaminase' + ' gene expression' + 'drought stress' + 'plants' +'PGPR'	Google Scholar	Delineation of mechanistic approaches employed by plant growth promoting microorganisms for improving drought stress tolerance in plants	Ali-Khan, 2021	Drought stress is expected to increase in intensity, frequency, and duration in many parts of the world, with potential negative impacts on plant growth and productivity. The plants have evolved complex physiological and biochemical mechanisms to respond and adjust to water-deficient environments. The physiological and biochemical mechanisms associated with water-stress tolerance and water-use ef…	Rejected	review
ACC-deaminase' + ' gene expression' + 'drought stress' + 'plants' +'PGPR'	Google Scholar	A critical review on fungi mediated plant responses with special emphasis to Piriformospora indica on improved production and protection of crops	Ansari et al., 2013	The beneficial fungi are potentially useful in agriculture sector to avail several services to crop plants such as water status, nutrient enrichment, stress tolerance, protection, weed control and bio-control. Natural agro-ecosystem relies on fungi because of it takes part in soil organic matter decomposition, nutrient acquisition, organic matter recycling, nutrient recycling, antagonism against …	Rejected	review
ACC-deaminase' + ' gene expression' + 'drought stress' + 'plants' +'PGPR'	Google Scholar	Plant Microbiome Engineering: Expected Benefits for Improved Crop Growth and Resilience	Arif et al., 2020	Plant-associated microbiomes can boost plant growth or control pathogens. Altering the microbiome by inoculation with a consortium of plant growth- promoting rhizobacteria (PGPR) can enhance plant development and mitigate against pathogens as well as abiotic stresses. Manipulating the plant holobiont by microbiome engineering is an emerging biotechnological strategy to improve crop yields and res…	Rejected	review
ACC-deaminase' + ' gene expression' + 'drought stress' + 'plants' +'PGPR'	Google Scholar	Abiotic stress remediation by the arbuscolar mycorrhizal symbiosis and rhizosphere bacteria/yeast interaction	Azcon et al., 2013		Rejected	Book chapter
ACC-deaminase' + ' gene expression' + 'drought stress' + 'plants' +'PGPR'	Google Scholar	Prospect of pink pigmented facultative methylotrophs in mitigating abiotic stress and climate change	Bajpai et al., 2022	Apparently, climate change is observed in form of increased greenhouse gases (CH4, CO2, N2O, CFC), temperature (0.5–1°C), and UV radiations (UV B and UV C). It is affecting every aspect of ecosystem functioning; however, terrestrial crops are the most vulnerable group and crop productivity largely remains a challenge. Due to climate change, seed yield and nutrient depletion are inevitable in futu…	Rejected	review
ACC-deaminase' + ' gene expression' + 'drought stress' + 'plants' +'PGPR'	Google Scholar	Towards a better greener future - an alternative strategy using biofertilizers. I: Plant growth promoting bacteria	Basu et al., 2017	In recent years, an unprecedented change in the environmental conditions has substantially affected the ability of plants to adapt to changing climactic conditions. These changes are primarily the result of population ex- plosion, increased air and soil pollution, heavy metals contamination of the ecosystem, degradation of soil quality, and global climate change among others. Hence, there is a ne…	Rejected	review
ACC-deaminase' + ' gene expression' + 'drought stress' + 'plants' +'PGPR'	Google Scholar	Mitigation of salinity stress in plants using plant growth promoting bacteria	Bhise-Dandge,2019	Salinity is one of the major constraints prevailing in environment that affects not only plant growth but also agriculture productivity and soil fertility. Salinity stress causes nutritional and hormonal imbalance, ion toxicity, oxidative and osmotic stress and increased susceptibility of plant to diseases. Increasing use of chemical based fertilizers creates demand for environmental friendly and…	Rejected	review
ACC-deaminase' + ' gene expression' + 'drought stress' + 'plants' +'PGPR'	Google Scholar	Plants Saline Environment in Perception with Rhizosphere Bacteria Containing 1-Aminocyclopropane-1-Carboxylate Deaminase	Bomle et al., 2021	Soil salinity stress has become a serious roadblock for food production worldwide since it is one of the key factors affecting agricultural productivity. Salinity and drought are predicted to cause considerable loss of crops. To deal with this difficult situation, a variety of strategies have been developed, including plant breeding, plant genetic engineering, and a wide range of agricultural pra…	Rejected	review
ACC-deaminase' + ' gene expression' + 'drought stress' + 'plants' +'PGPR'	Google Scholar	Communication of plants with microbial world: Exploring the regulatory networks for PGPR mediated defense signaling	Bukhat et al., 2020	Agricultural manipulation of potentially beneficial rhizosphere microbes is increasing rapidly due to their multi- functional plant-protective and growth related benefits. Plant growth promoting rhizobacteria (PGPR) are mostly non-pathogenic microbes which exert direct benefits on plants while there are rhizosphere bacteria which indirectly help plant by ameliorating the biotic and/or abiotic str…	Rejected	review
ACC-deaminase' + ' gene expression' + 'drought stress' + 'plants' +'PGPR'	Google Scholar	Combined Role of ACC Deaminase Producing Bacteria and Biochar on Cereals Productivity under Drought	Danish et al., 2020	Most of the cereal crops are widely cultivated to fulfil the humans food requirements. Under changing climate scenario, the intensity of drought stress is continuously increasing that is adversely affecting the growth and yield of cereal crops. Although the cereals can tolerate moderate drought to some extent, but mostly they are susceptible to severe drought stress. Higher biosynthesis of ethyle…	Rejected	review
ACC-deaminase' + ' gene expression' + 'drought stress' + 'plants' +'PGPR'	Google Scholar	Plant Growth-Promoting Bacteria: Mechanisms and Applications	Glick et al., 2012	The worldwide increases in both environmental damage and human population pressure have the unfortunate consequence that global food production may soon become insufficient to feed all of the world’s people. It is therefore essential that agricultural productivity be signi�cantly increased within the next few decades. To this end, agricultural practice is moving toward a more sustainable and envi…	Rejected	review
ACC-deaminase' + ' gene expression' + 'drought stress' + 'plants' +'PGPR'	Google Scholar	Changes in Plant Growth and Development by Rhizosphere Bacteria that Modify Plant Ethylene Levels	Glick et al., 2004	Plant growth-promoting bacteria that contain the enzyme 1-aminocyclo- propane-1-carboxylate (ACC) deaminase can modulate levels of the hormone ethylene within a plant. ACC deaminase-containing plant growth-promoting bacteria have been used to lower plant ethylene levels and hence much of the damage to plants following flooding, phytopathogen attack, in the presence of heavy metals, in senescing f…	Rejected	review
ACC-deaminase' + ' gene expression' + 'drought stress' + 'plants' +'PGPR'	Google Scholar	The Plant Healthy and Safety Guards Plant Growth Promoting Rhizo Bacteria (PGPR)	Guo et al., 2015		Rejected	review
ACC-deaminase' + ' gene expression' + 'drought stress' + 'plants' +'PGPR'	Google Scholar	Beneficial plant-associated bacteria modulate host hormonal system enhancing plant resistance toward abiotic stress	Hariprasadet al., 2015		Rejected	book chapter
ACC-deaminase' + ' gene expression' + 'drought stress' + 'plants' +'PGPR'	Google Scholar	Endophytic strains of Trichoderma increase plants’ photosynthetic capability	Harman et al., 2019		Rejected	Review
ACC-deaminase' + ' gene expression' + 'drought stress' + 'plants' +'PGPR'	Google Scholar	Plant microbiome and its functional mechanism in response to environmental stress	Jalil et al., 2018	Stresses are the prime factor for limiting agricultural productivity. Protracted stress conditions are accountable for the generation of reactive oxygen species (ROS) in various cell compartments. ROS attacks biomolecules and interrupts the regular mechanism of the cell that eventually prompts to cell death. Crops requisite to acclimatize adverse external stress generated by ecological conditions…	Rejected	review
ACC-deaminase' + ' gene expression' + 'drought stress' + 'plants' +'PGPR'	Google Scholar	Crosstalk between Brassinosteroids and Ethylene during Plant Growth and under Abiotic Stress Conditions	Jiroutova et al., 2018	Plant hormones through signaling networks mutually regulate several signaling and metabolic systems essential for both plant development and plant responses to different environmental stresses. Extensive research has enabled the main effects of all known phytohormones classes to be identified. Therefore, it is now possible to investigate the interesting topic of plant hormonal crosstalk more full…	Rejected	review
ACC-deaminase' + ' gene expression' + 'drought stress' + 'plants' +'PGPR'	Google Scholar	Future of Sustainable Agriculture in Saline Environments	Negacz et al., 2021		Rejected	book
ACC-deaminase' + ' gene expression' + 'drought stress' + 'plants' +'PGPR'	Google Scholar	Rhizobacterial-plant interactions: Strategies ensuring plant growth promotion under drought and salinity stress	Kaushal et al., 2016	Drought and salinity are major environmental stresses resulting in secondary stresses such as osmotic and oxidative stress (common to both stresses) as well as ionic stress (during salinity) causing alterations in physiological, biochemical and molecular processes in plants resulting in substantial loss to crop productivity. The major physiological parameters studied in plants during stressed con…	Rejected	review
ACC-deaminase' + ' gene expression' + 'drought stress' + 'plants' +'PGPR'	Google Scholar	Water Conservation and Plant Survival Strategies of Rhizobacteria under Drought Stress	Khan et al., 2020	Drylands are stressful environment for plants growth and production. Plant growth-promoting rhizobacteria (PGPR) acts as a rampart against the adverse impacts of drought stress in drylands and enhances plant growth and is helpful in agricultural sustainability. PGPR improves drought tolerance by implicating physio-chemical modifications called rhizobacterial-induced drought endurance and resilien…	Rejected	review
ACC-deaminase' + ' gene expression' + 'drought stress' + 'plants' +'PGPR'	Google Scholar	Understanding Host-Microbiome Interactions - An Omics Approach Omics of Host-Microbiome Association	Singh et al., 2017		Rejected	book
ACC-deaminase' + ' gene expression' + 'drought stress' + 'plants' +'PGPR'	Google Scholar	Microorganisms in Saline Environments: Strategies and Functions	Giri et al., 2019		Rejected	book
ACC-deaminase' + ' gene expression' + 'drought stress' + 'plants' +'PGPR'	Google Scholar	Current scenario and future prospects of plant growth-promoting rhizobacteria: an economic valuable resource for the agriculture revival under stressful conditions	Khoshru et al., 2020	The biotic and abiotic stresses are key constraints for food quality, crop yield and global food security. It is necessary to take action to cope with global threats caused by abiotic and biotic stresses such as a reduction in precipitation, increasing drought, salinity, improper temperature, heavy metals, nutrient deficiency and invasion of plants pathogenic microbes, which lead to the reduction…	Rejected	review
ACC-deaminase' + ' gene expression' + 'drought stress' + 'plants' +'PGPR'	Google Scholar	Microbial management of crop abiotic stresses: Current trends and prospects	Kumar et al., 2021		Rejected	book chapter
ACC-deaminase' + ' gene expression' + 'drought stress' + 'plants' +'PGPR'	Google Scholar	Phytohormonal basis for the plant growth promoting action of naturally occurring biostimulators	Kurepin et al., 2013	There is increasing interest in the use of naturally occurring ‘biostimulators’ for enhancing the growth of agricultural and horticultural crops. Bacteria, fungi and protozoa, as well as marine algae-based seaweed extracts, can produce or contain biostimulators. The activity of biostimulators to promote plant growth is often attributed to their ability to directly or indirectly provide mineral nu…	Rejected	review
ACC-deaminase' + ' gene expression' + 'drought stress' + 'plants' +'PGPR'	Google Scholar	Plant Responses to Abiotic Stresses and Rhizobacterial Biostimulants: Metabolomics and Epigenetics Perspectives	Lephatsi et al., 2021	In response to abiotic stresses, plants mount comprehensive stress-specific responses which mediate signal transduction cascades, transcription of relevant responsive genes and the accumulation of numerous different stress-specific transcripts and metabolites, as well as coordinated stress-specific biochemical and physiological readjustments. These natural mechanisms employed by plants are howeve…	Rejected	review
ACC-deaminase' + ' gene expression' + 'drought stress' + 'plants' +'PGPR'	Google Scholar	Plant responses to plant growth-promoting rhizobacteria	Loon 2007	Non-pathogenic soilborne microorganisms can promote plant growth, as well as suppress diseases. Plant growth promotion is taken to result from improved nutrient acquisition or hormonal stimulation. Disease suppression can occur through microbial antagonism or induction of resistance in the plant. Several rhizobacterial strains have been shown to act as plant growth-promoting bacteria through both…	Rejected	review
ACC-deaminase' + ' gene expression' + 'drought stress' + 'plants' +'PGPR'	Google Scholar	A Critical Review on Communication Mechanism within Plant-Endophytic Fungi Interactions to Cope with Biotic and Abiotic Stresses	Lu et al., 2021	Endophytic fungi infect plant tissues by evading the immune response, potentially stimulating stress-tolerant plant growth. The plant selectively allows microbial colonization to carve endophyte structures through phenotypic genes and metabolic signals. Correspondingly, fungi develop various adaptations through symbiotic signal transduction to thrive in mycorrhiza. Over the past decade, the regul…	Rejected	review
ACC-deaminase' + ' gene expression' + 'drought stress' + 'plants' +'PGPR'	Google Scholar	Various effects of fluorescent bacteria of the genus Pseudomonas containing ACC deaminase on wheat seedling growth	Magnucka et al., 2015	The study evaluates the effect of rhizobacteria having 1-aminocyclopropane-1-carboxylate deaminase (ACCd) on the development of wheat seedlings. This enzyme has been proposed to play a key role in microbe-plant association. Three fluorescent pseudomonads containing this deaminase were selected from 70 strains of pseudomonads isolated from rhizosphere of wheat (Triticum aestivum L.) and rape (Bras…	Rejected	Proteomic study
ACC-deaminase' + ' gene expression' + 'drought stress' + 'plants' +'PGPR'	Google Scholar	Insights into the plant responses to drought and decoding the potential of root associated microbiome for inducing drought tolerance	Mathur et al., 2021	Global increase in water scarcity is a serious problem for sustaining crop productivity. The lack of water causes the degeneration of the photosynthetic apparatus, an imbal- ance in key metabolic pathways, an increase in free radical generation as well as weakens the root architecture of plants. Drought is one of the major stresses that directly interferes with the osmotic status of plant cells. …	Rejected	review
ACC-deaminase' + ' gene expression' + 'drought stress' + 'plants' +'PGPR'	Google Scholar	Effects of plant growth-promoting rhizobacteria on the molecular responses of maize under drought and heat stresses: A review	Notununu et al., 2022	Drought and heat are major environmental stresses that continually influence plant growth and development. Under field conditions, these stresses occur more frequently in combination than alone, which magnifies corresponding detrimental effects on the growth and productivity of agriculturally important crops. Plant responses to such abiotic stresses are quite complex and manifested in a range of …	Rejected	review
ACC-deaminase' + ' gene expression' + 'drought stress' + 'plants' +'PGPR'	Google Scholar	The role of endophytes in secondary metabolites accumulation in medicinal plants under abiotic stress	Ogbe et al., 2020	Endophytes are microbial symbionts of plants which dwell within the internal tissues of healthy plants with- out the manifestation of any infection symptoms on their hosts. In addition to being vital to the growth and development of their host, endophytes also assist their medicinal plant host species in accumulating some highly coveted plant secondary metabolites under various abiotic stress con…	Rejected	review
ACC-deaminase' + ' gene expression' + 'drought stress' + 'plants' +'PGPR'	Google Scholar	The role of biostimulants and bioeffectors as alleviators of abiotic stress in crop plants	Oosten et al., 2017	The use of bioeffectors, formally known as plant biostimulants, has become common practice in agriculture and provides a number of benefits in stimulating growth and protecting against stress. A biostimulant is loosely defined as an organic material and/or microorganism that is applied to enhance nutrient uptake, stimulate growth, enhance stress tolerance or crop quality. This review is intended …	Rejected	review
ACC-deaminase' + ' gene expression' + 'drought stress' + 'plants' +'PGPR'	Google Scholar	Bacillus: A Biological Tool for Crop Improvement through Bio-Molecular Changes in Adverse Environments	Radhakrishnan et al., 2017	Crop productivity is affected by environmental and genetic factors. Microbes that are beneficial to plants are used to enhance the crop yield and are alternatives to chemical fertilizers and pesticides. Pseudomonas and Bacillus species are the predominant plant growth-promoting bacteria. The spore-forming ability of Bacillus is distinguished from that of Pseudomonas. Members of this genus also su…	Rejected	review
ACC-deaminase' + ' gene expression' + 'drought stress' + 'plants' +'PGPR'	Google Scholar	Role and potential applications of plant growth-promoting rhizobacteria for sustainable agriculture	Rai et al., 2020		Rejected	chapter book
ACC-deaminase' + ' gene expression' + 'drought stress' + 'plants' +'PGPR'	Google Scholar	Mechanism and Understanding of PGPR: An Approach for Sustainable Agriculture Under Abiotic Stresses	U PADHYAY		Rejected	chapter book
ACC-deaminase' + ' gene expression' + 'drought stress' + 'plants' +'PGPR'	Google Scholar	Accumulation and Transport of 1-Aminocyclopropane-1-Carboxylic Acid (ACC) in Plants: Current Status, Considerations for Future Research and Agronomic Applications	Vanderstraeten et al., 2017	1-aminocyclopropane-1-carboxylic acid (ACC) is a non-protein amino acid acting as the direct precursor of ethylene, a plant hormone regulating a wide variety of vegetative and developmental processes. ACC is the central molecule of ethylene biosynthesis. The rate of ACC formation differs in response to developmental, hormonal and environmental cues. ACC can be conjugated to three derivatives, met…	Rejected	review
ACC-deaminase' + ' gene expression' + 'drought stress' + 'plants' +'PGPR'	Google Scholar	Interactive Role of Silicon and Plant–Rhizobacteria Mitigating Abiotic Stresses: A New Approach for Sustainable Agriculture and Climate Change	Verma et al., 2020	Abiotic stresses are the major constraints in agricultural crop production across the globe. The use of some plant–microbe interactions are established as an environment friendly way of enhancing crop productivity, and improving plant development and tolerance to abiotic stresses by direct or indirect mechanisms. Silicon (Si) can also stimulate plant growth and mitigate environmental stresses, an…	Rejected	review
ACC-deaminase' + ' gene expression' + 'drought stress' + 'plants' +'PGPR'	Google Scholar	The Potential Application of Endophytes in Management of Stress from Drought and Salinity in Crop Plants	Verma et al., 2021	Endophytic microorganisms present inside the host plant play an essential role in host fitness, nutrient supply and stress tolerance. Endophytes are often used in sustainable agriculture as biofertilizers, biopesticides and as inoculants to mitigate abiotic stresses including salinity, drought, cold and pH variation in the soil. In changing climatic conditions, abiotic stresses create global chal…	Rejected	review
ACC-deaminase' + ' gene expression' + 'drought stress' + 'plants' +'PGPR'	Google Scholar	Ethylene biosynthesis controlled by NON-RIPENING: A regulatory conflict between wounding and ripening	Wang et al., 2018	The phytohormone ethylene is involved in multiple aspects of morphological and physiological processes in plants. Tomato rapidly and transiently increases ethylene production during fruit ripening and in plant defense responses. The transcription factor non-ripening (NOR) has significant effects on fruit ripening via regulation of ethylene biosynthesis-related genes. The nor loss-of-function alle…	Rejected	No drought stress
ACC-deaminase' + ' gene expression' + 'drought stress' + 'plants' +'PGPR'	Google Scholar	Plant survival under drought stress: Implications, adaptive responses, and integrated rhizosphere management strategy for stress mitigation	Zia et al., 2021	In many regions of the world, the incidence and extent of drought spells are predicted to increase which will create considerable pressure on global agricultural yields. Most likely among all the abiotic stresses, drought has the strongest effect on soil biota and plants along with complex environmental effects on other ecological sys- tems. Plants being sessile appears the least resilient where …	Rejected	review
ACC-deaminase' + ' gene expression' + 'drought stress' + 'plants' +'PGPR'	Google Scholar	The Plant Family Brassicaceae Biology and Physiological Responses to Environmental Stresses	Hasanuzzaman, 2020		Rejected	book
ACC-deaminase' + ' gene expression' + 'drought stress' + 'plants' +'PGPR'	Google Scholar	The Role of Plant Growth-Promoting Bacteria in Alleviating the Adverse Effects of Drought on Plants	Abdelaal et al., 2021	Plant growth-promoting bacteria play an essential role in enhancing the physical, chemical and biological characters of soils by facilitating nutrient uptake and water flow, especially under abiotic stress conditions, which are major constrains to agricultural development and production. Drought is one of the most harmful abiotic stress and perhaps the most severe problem facing agricultural sust…	Rejected	review
ACC-deaminase' + ' gene expression' + 'drought stress' + 'plants' +'PGPR'	Google Scholar	Regulation of Ethylene Biosynthesis	Argueso et al.,2007	The biosynthesis of the gaseous phytohormone ethylene is a highly regulated process. A major point of regulation occurs at the generally rate- limiting step in biosynthesis, catalyzed by the enzyme ACC synthase (ACS). ACS is encoded by a multigene family, and different members show distinct patterns of expression during growth and development, and in response to various external cues. In addition…	Rejected	review
ACC-deaminase' + ' gene expression' + 'drought stress' + 'plants' +'PGPR'	Google Scholar	DROUGHT AND NUTRITIONAL STRESSES IN PLANT: ALLEVIATING ROLE OF RHIZOSPHERIC MICROORGANISMS	Bardi et al., 2012		Rejected	book chapter
ACC-deaminase' + ' gene expression' + 'drought stress' + 'plants' +'PGPR'	Google Scholar	Biofertilizers function as key player in sustainable agriculture by improving soil fertility, plant tolerance and crop productivity	Bhardwaj et al., 2014	Current soil management strategies are mainly dependent on inorganic chemical-based fertilizers, which caused a serious threat to human health and environment. The exploitation of beneficial microbes as a biofertilizer has become paramount importance in agriculture sector for their potential role in food safety and sustainable crop production. The eco-friendly approaches inspire a wide range of a…	Rejected	review
ACC-deaminase' + ' gene expression' + 'drought stress' + 'plants' +'PGPR'	Google Scholar	Beneficial Microorganisms and Abiotic Stress Tolerance in Plants	Chatterjee et al., 2019		Rejected	book chapter
ACC-deaminase' + ' gene expression' + 'drought stress' + 'plants' +'PGPR'	Google Scholar	Durum Wheat Stress Tolerance Induced by Endophyte Pantoea agglomerans with Genes Contributing to Plant Functions and Secondary Metabolite Arsenal	Cherif-Silini et al., 2019	In the arid region Bou-Saâda at the South of Algeria, durum wheat Triticum durum L. cv Waha production is severely threatened by abiotic stresses, mainly drought and salinity. Plant growth-promoting rhizobacteria (PGPR) hold promising prospects towards sustainable and environmentally-friendly agriculture. Using habitat-adapted symbiosis strategy, the PGPR Pantoea agglomerans strain Pa was recover…	Rejected	review
ACC-deaminase' + ' gene expression' + 'drought stress' + 'plants' +'PGPR'	Google Scholar	Integrated physiological and molecular approaches to improvement of abiotic stress tolerance in two pulse crops of the semi-arid tropics	Choudhary et al., 2017	Chickpea (Cicer arietinum L.) and pigeonpea [Cajanus cajan L. (Millsp.)] play an important role in mitigating protein malnutrition for millions of poor vegetarians living in regions of the semi-arid tropics. Abiotic stresses such as excess and limited soil moisture (water-logging and drought), heat and chilling (high and low temperature stresses), soil salinity, and acidity are major yield constr…	Rejected	review
ACC-deaminase' + ' gene expression' + 'drought stress' + 'plants' +'PGPR'	Google Scholar	Biotechnological perspectives of microbes in agro-ecosystems	Choudhary et al.,2011	In subsistence agricultural systems, crop yields are directly dependent on the inherent soil fertility and on microbial processes that govern the mineralization and mobilization of nutrients required for plant growth. An impact of different crop species that are used in various combinations is likely to be an important factor in determining the structure of plant beneficial microbial communities …	Rejected	review
ACC-deaminase' + ' gene expression' + 'drought stress' + 'plants' +'PGPR'	Google Scholar	Genetic modulation of ethylene biosynthesis and signaling in plants	Czarny et al., 2006	With the isolation and characterization of the key enzymes and proteins, and the corresponding genes, involved in ethylene biosynthesis and sensing it has become possible to manipulate plant ethylene levels and thereby alter a wide range of physiological processes. The phytohormone ethylene is an essential signaling molecule that affects a large number of physiological processes; plants deprived …	Rejected	review
ACC-deaminase' + ' gene expression' + 'drought stress' + 'plants' +'PGPR'	Google Scholar	Unveiling Plant-Beneficial Function as Seen in Bacteria Genes from Termite Mound Soil	Enagbonma et al., 2020	The use of termite mound soils in enhancing soil fertility and plant growth, especially in areas with poor soil conditions, has been recommended by many research studies. Most of these recommendations are, however, based on the high nutrient levels in termite mound soils. Thus, this study aimed to verify if plant growth–promoting bacteria in termite soils also play a role in improving plant growt…	Rejected	review
ACC-deaminase' + ' gene expression' + 'drought stress' + 'plants' +'PGPR'	Google Scholar	Recent Advances in Bacterial Amelioration of Plant Drought and Salt Stress	Gamalero et al., 2022	The recent literature indicates that plant growth-promoting bacteria (PGPB) employ a range of mechanisms to augment a plant’s ability to ameliorate salt and drought stress. These mechanisms include synthesis of auxins, especially indoleacetic acid, which directly promotes plant growth; synthesis of antioxidant enzymes such as catalase, superoxide dismutase and peroxidase, which prevents the delet…	Rejected	review
ACC-deaminase' + ' gene expression' + 'drought stress' + 'plants' +'PGPR'	Google Scholar	Effect of PGPR isolates on Plant growth promotion in relation to salinity stress	Gupta et al., 2019	PGPRs are directly or indirectly involved in promoting growth and development of the plant by producing certain phytohormones through different mechanisms. Various studies revealed that application of plant growth promoting microbes can increase the crop production and yield even under various biotic and abiotic stress conditions. Different direct and indirect mechanisms are involved in the plant…	Rejected	review
ACC-deaminase' + ' gene expression' + 'drought stress' + 'plants' +'PGPR'	Google Scholar	The contribution of Trichoderma to balancing the costs of plant growth and defense	Hermosa et al.,2013	Trichoderma is a fungal genus of cosmopolitan distribution and high biotechnological value, with several species currently used as biological control agents. Additionally, the enzyme systems of the fungus are widely applied in industry. Spe- cies of Trichoderma protect plants against the attack of soil-borne plant pathogens by competing for nutrients and inhibiting or killing plant pathogenic fun…	Rejected	review
ACC-deaminase' + ' gene expression' + 'drought stress' + 'plants' +'PGPR'	Google Scholar	Association of Rhizospheric/Endophytic Bacteria with Plants: A Potential Gateway to Sustainable Agriculture	Jha et al.,2013	Application of associative bacteria for sustainable agriculture holds immense potential. These bacteria are known to enhance growth and yield of plants by fixing atmospheric nitrogen, solubilization of phosphate, production of phytohormones and siderophores, possession of antagonistic activity as well as reducing the level of stress ethylene in host plants. Colonization of these bacteria can be t…	Rejected	review
ACC-deaminase' + ' gene expression' + 'drought stress' + 'plants' +'PGPR'	Google Scholar	Unsnarling Plausible Role of Plant Growth‐Promoting Rhizobacteria for Mitigating Cd‐Toxicity from Plants: An Environmental Safety Aspect	Khanna et al., 2021	Cadmium (Cd) is predominantly observed within the soil to cause deterioration of plant and microbial activities within rhizosphere. Cd-toxicity leads to major agricultural constraints due to its accumulation within plants and therefore entry within food chain. Plants face numerous repercussions like stunted growth, chlorosis, necrosis, inhibition of photosynthetic machinery and other physiologica…	Rejected	review
ACC-deaminase' + ' gene expression' + 'drought stress' + 'plants' +'PGPR'	Google Scholar	Successful Plant Growth-Promoting Microbes: Inoculation Methods and Abiotic Factors	Lopes et al., 2021	Plant-microbe interactions have been the subject of several biotechnological studies, seeking sustainable development and environmental conservation. The inoculation of plant growth-promoting microbes (PGPM) in agricultural crops is considered an environmental-friendly alternative to chemical fertilization. Microbial inoculants are mainly inoculated onto seeds, roots and soil. PGPM improve plant …	Rejected	review
ACC-deaminase' + ' gene expression' + 'drought stress' + 'plants' +'PGPR'	Google Scholar	Isolation and identification of multi‐trait plant growth–promoting rhizobacteria from coastal sand dune plant species of Pohang beach	Moon-Ali, 2022	Rhizobacteria are root-associated bacteria that influence plant growth by various direct and indirect mechanisms. In quest of efficient plant growth–promoting rhizobacteria (PGPR) with multiple plant growth–promoting traits, a total of 52 rhizobac- terial isolates were isolated from the rhizospheric soil collected at Pohang beach, Republic of Korea. The bacterial isolates were evaluated in vitro …	Rejected	Proteomic study
ACC-deaminase' + ' gene expression' + 'drought stress' + 'plants' +'PGPR'	Google Scholar	Effects of actinobacteria on plant disease suppression and growth promotion	Palaniyandi et al.,2013	Biological control and plant growth promotion by plant beneficial microbes has been viewed as an alternative to the use of chemical pesticides and fertilizers. Bacteria and fungi that are naturally associated with plants and have a beneficial effect on plant growth by the alleviation of biotic and abiotic stresses were isolated and developed into biocon- trol (BCA) and plant growth-promoting agen…	Rejected	review
ACC-deaminase' + ' gene expression' + 'drought stress' + 'plants' +'PGPR'	Google Scholar	Current Perspectives on Plant Growth-Promoting Rhizobacteria	Parray et al., 2016	The rhizosphere of plant species is an inim- itable ecosystem that harbors an extensive range of microbes. Research in the wide areas of rhizosphere biotechnology highlighting new bioinoculants has received ample attention during recent past, and suitable expertises have been developed. However, the global recognition of such technologies by farmers is still overwhelmed with doubts owing to limit…	Rejected	review
ACC-deaminase' + ' gene expression' + 'drought stress' + 'plants' +'PGPR'	Google Scholar	Genome of Herbaspirillum seropedicae Strain SmR1, a Specialized Diazotrophic Endophyte of Tropical Grasses	Pedrosa et al., 2011	The molecular mechanisms of plant recognition, colonization, and nutrient exchange between diazotrophic endophytes and plants are scarcely known. Herbaspirillum seropedicae is an endophytic bacterium capable of colonizing intercellular spaces of grasses such as rice and sugar cane. The genome of H. seropedicae strain SmR1 was sequenced and annotated by The Parana ́ State Genome Programme—GENOPAR.…	Rejected	No abiotic stress
ACC-deaminase' + ' gene expression' + 'drought stress' + 'plants' +'PGPR'	Google Scholar	Rhizosphere Microbiome Assembly and Its Impact on Plant Growth	Qu et al., 2020	Microorganisms colonizing the plant rhizosphere provide a number of beneficial functions for their host. Although an increasing number of investigations clarified the great functional capabilities of rhizosphere microbial communities, the understanding of the precise mechanisms underlying the impact of rhizosphere microbiome assemblies is still limited. Also, not much is known about the various b…	Rejected	review
ACC-deaminase' + ' gene expression' + 'drought stress' + 'plants' +'PGPR'	Google Scholar	Biotechnological interventions for inducing abiotic stress tolerance in crops	Rani et al., 2021	Abiotic stress led decline in the yield of food cropshas raised concern over food security all over the globe. Principal abiotic stresses like drought, heat & salinity continue to affect plant growth, development and ulti- mately yield, a condition which is being further aggravated by climate change induced global warming. Some modern approaches have been unfurled by the researchers to mitigate t…	Rejected	review
ACC-deaminase' + ' gene expression' + 'drought stress' + 'plants' +'PGPR'	Google Scholar	Morpho-Physiological, Biochemical and Molecular Adaptation of Millets to Abiotic Stresses: A Review	Saleem et al., 2021	Abiotic stresses such as drought, heat, cold, nutrient deficiency, excess salt and hazardous metals can hamper plantgrowth and development. Intensive agriculture of only a few major staple food crops that are sensitive and intolerant to environmental stresses has led to an agrarian crisis. On the other hand, nutritionally rich, gluten free and stress tolerant plants like millets are neglected and…	Rejected	review
ACC-deaminase' + ' gene expression' + 'drought stress' + 'plants' +'PGPR'	Google Scholar	Microbes mediated plant stress tolerance in saline agricultural ecosystem	Salwan et al.,2019	Background The accumulation of salts leads to assimi- lation of dissolved salts in the soil which results in soil salinity. Salinity affects the crop yield by reducing the levels of minerals availability, inducing ions mediated toxicity, osmotic stress, growth regulators level and reactive oxygen species production which ultimately lead to the inhibition of seed germination, seedling growth, onse…	Rejected	review
ACC-deaminase' + ' gene expression' + 'drought stress' + 'plants' +'PGPR'	Google Scholar	Endophytic Bacteria in Plant Salt Stress Tolerance: Current and Future Prospects	Vaishnav et al., 2019	Soil salinity is a major limiting factor for crop productivity worldwide and is continuously increasing owing to climate change. A wide range of studies and practices have been performed to induce salt tolerance mechanisms in plants, but their result in crop improvement has been limited due to lack of time and money. In the current scenario, there is increasing attention towards habitat-imposed p…	Rejected	review
ACC-deaminase' + ' gene expression' + 'drought stress' + 'plants' +'PGPR'	Google Scholar	Ethylene Biosynthesis and Signaling Networks	Wang et al., 2002		Rejected	review
ACC-deaminase' + ' gene expression' + 'drought stress' + 'plants' +'PGPR'	Google Scholar	Biodiversity and biotechnological applications of halophilic microbes for sustainable agriculture	Yadav et al., 2018	Extreme saline environments represent unique ecosystems for novel microbial biodiversity. The salt-tolerant microbiomes have been reported from diverse saline habitat. The biodiversity of salt-tolerant microbes showed the presence of different groups of microbes including Actinobacteria, Bacteroidetes, Euryarchaeota, Firmicutes, Proteobacteria, and Spirochaetes. The salt-tolerant plant growth pro…	Rejected	review
ACC-deaminase' + ' gene expression' + 'drought stress' + 'plants' +'PGPR'	Google Scholar	Mechanisms in plant growth-promoting rhizobacteria that enhance legume–rhizobial symbioses	Alemneh et al., 2020	Nitrogen fixation is an important biological process in terrestrial ecosystems and for global crop production. Legume nodulation and N2 fixation have been improved using nodule-enhancing rhizobacteria (NER) under both regular and stressed conditions. The positive effect of NER on legume–rhizobia symbiosis can be facilitated by plant growth-promoting (PGP) mechanisms, some of which remain to be id…	Rejected	review
ACC-deaminase' + ' gene expression' + 'drought stress' + 'plants' +'PGPR'	Google Scholar	Plant Growth-Promoting Rhizobacteria: Context, Mechanisms of Action, and Roadmap to Commercialization of Biostimulants for Sustainable Agriculture	Backer et al., 2018	Microbes of the phytomicrobiome are associated with every plant tissue and, in combination with the plant form the holobiont. Plants regulate the composition and activity of their associated bacterial community carefully. These microbes provide a wide range of services and benefits to the plant; in return, the plant provides the microbial community with reduced carbon and other metabolites. Soils…	Rejected	review
ACC-deaminase' + ' gene expression' + 'drought stress' + 'plants' +'PGPR'	Google Scholar	WRKY transcription factors	Bakshi et al., 2014	wRKY transcription factors are one of the largest families of transcriptional regulators found exclusively in plants. They have diverse biological functions in plant disease resistance, abiotic stress responses, nutrient deprivation, senescence, seed and trichome development, embryogenesis, as well as additional developmental and hormone-controlled processes. wRKYs can act as transcriptional acti…	Rejected	review
ACC-deaminase' + ' gene expression' + 'drought stress' + 'plants' +'PGPR'	Google Scholar	Microbial interactions: ecology in a molecular perspective	Braga et al., 2016	The microorganism–microorganism or microorganism–host interactions are the key strat- egy to colonize and establish in a variety of different environments. These interactions involve all ecological aspects, including physiochemical changes, metabolite exchange, metabolite conversion, signaling, chemotaxis and genetic exchange resulting in geno- type selection. In addition, the establishment in th…	Rejected	review
ACC-deaminase' + ' gene expression' + 'drought stress' + 'plants' +'PGPR'	Google Scholar	Advances in Wheat Physiology in Response to Drought and the Role of Plant Growth Promoting Rhizobacteria to Trigger Drought Tolerance	Camaille et al., 2021	In the coming century, climate change and the increasing human population are likely lead- ing agriculture to face multiple challenges. Agricultural production has to increase while preserving natural resources and protecting the environment. Drought is one of the major abiotic problems, which limits the growth and productivity of crops and impacts 1–3% of all land.To cope with unfavor- able wate…	Rejected	review
ACC-deaminase' + ' gene expression' + 'drought stress' + 'plants' +'PGPR'	Google Scholar	Bio-priming of seeds: Plant stress management and its underlying cellular, biochemical and molecular mechanisms	Chakraborti et al., 2022	Exposure of crops to stress is the most significant barrier to agricultural output and food security worldwide. Stress induces changes in plants’ physiological functions, which leads to lower plant growth and agricultural yield. Plants undergo a variety of molecular, cellular, and physiological changes to combat various abiotic stresses. Plants suffer from increased osmotic pressure outside the r…	Rejected	review
ACC-deaminase' + ' gene expression' + 'drought stress' + 'plants' +'PGPR'	Google Scholar	Rhizoremediation of petroleum hydrocarbons: a model system for plant microbiome manipulation	Correa et al., 2018	Phytoremediation is a green and sustainable alternative to physico-chemical methods for contaminated soil remediation. One of the flavours of phytoremediation is rhizoremediation, where plant roots stimulate soil microbes to degrade organic contaminants. This approach is particularly interesting as it takes advantage of naturally evolved interaction mechanisms between plant and microorganisms and…	Rejected	review
ACC-deaminase' + ' gene expression' + 'drought stress' + 'plants' +'PGPR'	Google Scholar	Plant Growth-Promoting Effects of Rizhobacteria on Abiotic Stressed Plants. Azospirillum-Grasses Model	Creus et al., 2010		Rejected	review
ACC-deaminase' + ' gene expression' + 'drought stress' + 'plants' +'PGPR'	Google Scholar	Paenibacillus lentimorbus Enhanced Abiotic Stress Tolerance Through Lateral Root Formation and Phytohormone Regulation	Dixit et al., 2021	Under the stressed conditions plant growth-promoting rhizobacteria (PGPR) are able to stimulate plant growth through several mechanisms, including antioxidants alleviation, regulation of stress responsive genes and phytohormones etc. Present study is conducted to investigate the impact of Paenibacillus lentimorbus B-30488 inoculation on salinity and drought stress mitigation in Arabidopsis thalia…	Rejected	No acdS expression
ACC-deaminase' + ' gene expression' + 'drought stress' + 'plants' +'PGPR'	Google Scholar	Interaction of endophytic microbes with legumes	Dudeja et al., 2012	Large numbers of bacterial and fungal endophytes have been reported from different plant tissues: roots, nodules, leaves, flowers and sprouts of legumes, with numbers ranging from few to more than 150. Endophytes can accelerate seedling emergence, promote plant establishment under adverse conditions and enhance plant growth. Endophytic microbes promote plant growth by helping plants in acquiring …	Rejected	review
ACC-deaminase' + ' gene expression' + 'drought stress' + 'plants' +'PGPR'	Google Scholar	Bacterial endophytes: Molecular interactions with their hosts	Dudeja et al., 2021	Plant growth promotion has been found associated with plants on the surface (epiphytic), inside (endophytic), or close to the plant roots (rhizospheric). Endophytic bacteria mainly have been researched for their beneficial activities in terms of nutrient availability, plant growth hormones, and control of soil‐ borne and systemic pathogens. Molecular communications leading to these interactions b…	Rejected	review
ACC-deaminase' + ' gene expression' + 'drought stress' + 'plants' +'PGPR'	Google Scholar	Phytohormones and Beneficial Microbes: Essential Components for Plants to Balance Stress and Fitness	Egamberdieva et al., 2017	Plants are subjected to various abiotic stresses, such as drought, extreme temperature, salinity, and heavy metals. Abiotic stresses have negative impact on the physiology and morphology of plants through defects in the genetic regulation of cellular pathways. Plants employ several tolerance mechanisms and pathways to avert the effects of stresses that are triggered whenever alterations in metabo…	Rejected	review
ACC-deaminase' + ' gene expression' + 'drought stress' + 'plants' +'PGPR'	Google Scholar	Hormones as go-betweens in plant microbiome assembly	Eichmann et al., 2021	The interaction of plants with complex microbial communities is the result of co-evolution over millions of years and contributed to plant transition and adaptation to land. The ability of plants to be an essential part of complex and highly dynamic ecosystems is dependent on their interaction with diverse microbial communities. Plant microbiota can support, and even enable, the diverse functions…	Rejected	review
ACC-deaminase' + ' gene expression' + 'drought stress' + 'plants' +'PGPR'	Google Scholar	Paraburkholderia phytofirmans PsJN-Plants Interaction: From Perception to the Induced Mechanisms	Esmaeel et al., 2018	The use of plant-associated bacteria has received many scientific and economic attention as an effective and alternative method to reduce the chemical pesticides use in agriculture. The genus Burkholderia includes at least 90 species including pathogenic strains, plant pathogens, as well as plant beneficial species as those related to Paraburkholderia, which has been reported to be associated wit…	Rejected	review
ACC-deaminase' + ' gene expression' + 'drought stress' + 'plants' +'PGPR'	Google Scholar	Halotolerant plant growth–promoting bacteria: Prospects for alleviating salinity stress in plants	Etesami et al., 2020	As one of the major non–biological stresses, soil salinity negatively affects agricultural productivity, microbial communities, and agricultural economics in impacted areas and is a significant agrarian problem worldwide that has expanded in the last few decades. The use of glycophytes (salt–sensitive plants) is the primary limitation to such an agricultural approach. However, halophytes, which a…	Rejected	review
ACC-deaminase' + ' gene expression' + 'drought stress' + 'plants' +'PGPR'	Google Scholar	Halotolerant plant growth–promoting bacteria: Prospects for alleviating salinity stress in plants	Etesami et al., 2020		Rejected	Duplicate
ACC-deaminase' + ' gene expression' + 'drought stress' + 'plants' +'PGPR'	Google Scholar	Understanding and engineering beneficial plant–microbe interactions: plant growth promotion in energy crops	Farrar et al., 2014	Plant production systems globally must be optimized to produce stable high yields from limited land under changing and variable climates. Demands for food, animal feed, and feedstocks for bioenergy and biorefining applications, are increasing with population growth, urbanization and affluence. Low-input, sustainable, alternatives to petrochemical-derived fertilizers and pesticides are required to…	Rejected	review
ACC-deaminase' + ' gene expression' + 'drought stress' + 'plants' +'PGPR'	Google Scholar	The Contrivance of Plant Growth Promoting Microbes to Mitigate Climate Change Impact in Agriculture	Fiodor et al., 2021	Combating the consequences of climate change is extremely important and critical in the context of feeding the world’s population. Crop simulation models have been extensively studied recently to investigate the impact of climate change on agricultural productivity and food security. Drought and salinity are major environmental stresses that cause changes in the physiological, biochemical, and mo…	Rejected	review
ACC-deaminase' + ' gene expression' + 'drought stress' + 'plants' +'PGPR'	Google Scholar	Beneficial role of plant growth promoting bacteria and arbuscular mycorrhizal fungi on plant responses to heavy metal stress	Gamalero et al., 2008	Heavy metal pollution is a major worldwide environmental concern that has recently motivated researchers to develop a variety of novel approaches towards its cleanup. As an alternative to traditional physical and chemical methods of environmental cleanup, scientists have developed phytoremediation approaches that include the use of plants to remove or render harmless a range of compounds. Both pl…	Rejected	review
ACC-deaminase' + ' gene expression' + 'drought stress' + 'plants' +'PGPR'	Google Scholar	Saline and Arid Soils: Impact on Bacteria, Plants, and Their Interaction	Gamalero et al., 2020	Salinity and drought are the most important abiotic stresses hampering crop growth and yield. It has been estimated that arid areas cover between 41% and 45% of the total Earth area worldwide. At the same time, the world’s population is going to soon reach 9 billion and the survival of this huge amount of people is dependent on agricultural products. Plants growing in saline/arid soil shows low g…	Rejected	review
ACC-deaminase' + ' gene expression' + 'drought stress' + 'plants' +'PGPR'	Google Scholar	Root-targeted biotechnology to mediate hormonal signalling and improve crop stress tolerance	Ghanem et al., 2011	Since plant root systems capture both water and nutrients essential for the formation of crop yield, there has been renewed biotechnological focus on root system improvement. Although water and nutrient uptake can be facilitated by membrane proteins known as aquaporins and nutrient transporters, respectively, there is a little evidence that root-localised overexpression of these proteins improves…	Rejected	review
ACC-deaminase' + ' gene expression' + 'drought stress' + 'plants' +'PGPR'	Google Scholar	Transgenic technology for efficient abiotic stress tolerance in plants	Gokul et al., 2020		Rejected	book chapter
ACC-deaminase' + ' gene expression' + 'drought stress' + 'plants' +'PGPR'	Google Scholar	Transgenic technology for efficient abiotic stress tolerance in plants	Gokul et al., 2020		Rejected	Duplicate
ACC-deaminase' + ' gene expression' + 'drought stress' + 'plants' +'PGPR'	Google Scholar	Mechanistic insights of plant-microbe interaction towards drought and salinity stress in plants for enhancing the agriculture productivity	Gupta et al., 2022	The agricultural sector is an important part of the Indian economy. The sector is challenged by various stresses, leading to huge loss in crop productivity globally and disturbs agricultural sustainability. Abiotic stresses (drought and salinity) are among the foremost ecological factors that hinder agricultural productivity globally. Several ecological stresses generate excess amounts of reactiv…	Rejected	review
ACC-deaminase' + ' gene expression' + 'drought stress' + 'plants' +'PGPR'	Google Scholar	Bacterial Plant Biostimulants: A Sustainable Way towards Improving Growth, Productivity, and Health of Crops	Hamid et al., 2021	This review presents a comprehensive and systematic study of the field of bacterial plant biostimulants and considers the fundamental and innovative principles underlying this technology. Plant biostimulants are an important tool for modern agriculture as part of an integrated crop man- agement (ICM) system, helping make agriculture more sustainable and resilient. Plant biostimulants contain subs…	Rejected	review
ACC-deaminase' + ' gene expression' + 'drought stress' + 'plants' +'PGPR'	Google Scholar	Bacillus subtilis: A plant-growth promoting rhizobacterium that also impacts biotic stress	Hashem et al., 2019	Plants encounter many biotic agents, such as viruses, bacteria, nematodes, weeds, and arachnids. These enti- ties induce biotic stress in their hosts by disrupting normal metabolism, and as a result, limit plant growth and/or are the cause of plant mortality. Some biotic agents, however, interact symbiotically or synergisti- cally with their host plants. Some microbes can be beneficial to plants …	Rejected	review
ACC-deaminase' + ' gene expression' + 'drought stress' + 'plants' +'PGPR'	Google Scholar	Where biotic and abiotic stress responses converge: Common patterns in response to salinity and Plum pox virus infection in pea and peach plants	Hernández et al., 2021	Herbaceous and woody plants display specific mechanisms allowing them to adapt and survive to a broad variety of environmental stresses. Nevertheless, all plant species share certain basic physiological and biochemical mechanisms. Under both abiotic and biotic challenges, the extent to which reactive oxygen species (ROS) accumulate relies on the antioxidative system, which is in charge to maintai…	Rejected	review
ACC-deaminase' + ' gene expression' + 'drought stress' + 'plants' +'PGPR'	Google Scholar	Plant Growth-Promoting Halobacteria and Their Ability to Protect Crops from Abiotic Stress: An Eco-Friendly Alternative for Saline Soils	Hernández-Canseco et al., 2022	Arid and semi-arid soils display low productivity due to abiotic stress associated with drought and salinity. Halobacteria can increase the yield of crops grown under these types of stress. These bacteria thrive across a wide salinity range (1–25% NaCl) and also in the absence of NaCl and have direct and indirect mechanisms that promote plant growth. This review summarizes studies conducted over …	Rejected	review
ACC-deaminase' + ' gene expression' + 'drought stress' + 'plants' +'PGPR'	Google Scholar	Plant-growth-promoting rhizobacteria: drought stress alleviators to ameliorate crop production in drylands	Kaushal et al., 2015	Drylands are known for being a drought stressed environment, which is an alarming constraint to crop produc- tivity. To rescue plant growth in such stressful conditions, plant-growth-promoting rhizobacteria (PGPR) are a bulwark against drought stress and imperilled sustainability of agricul- ture in drylands. PGPR mitigates the impact of drought stress on plants through a process called rhizobact…	Rejected	review
ACC-deaminase' + ' gene expression' + 'drought stress' + 'plants' +'PGPR'	Google Scholar	Nitrogen fertility and abiotic stresses management in cotton crop: a review	Khan et al., 2017	This review outlines nitrogen (N) responses in crop production and potential management decisions to ameliorate abiotic stresses for better crop production. N is a primary constituent of the nucleotides and proteins that are essential for life. Production and application of N fertilizers consume huge amounts of energy, and excess is detrimental to the environment. Therefore, increasing plant N us…	Rejected	review
ACC-deaminase' + ' gene expression' + 'drought stress' + 'plants' +'PGPR'	Google Scholar	Multifaceted Interactions Between Endophytes and Plant: Developments and Prospects	Khare et al., 2018	Microbial endophytes are present in all known plant species. The ability to enter and thrive in the plant tissues makes endophytes unique, showing multidimensional interactions within the host plant. Several vital activities of the host plant are known to be influenced by the presence of endophytes. They can promote plant growth, elicit defense response against pathogen attack, and can act as rem…	Rejected	review
ACC-deaminase' + ' gene expression' + 'drought stress' + 'plants' +'PGPR'	Google Scholar	Rhizosphere pseudomonads as probiotics improving plant health	Kim et al., 2018	Many root-colonizing microbes are multifaceted in traits that improve plant health. Although isolates designated as biological control agents directly reduce pathogen growth, many exert additional beneficial features that parallel changes induced in animal and other hosts by health-promoting microbes termed probiotics. Both animal and plant probiotics cause direct antagonism of pathogens and indu…	Rejected	review
ACC-deaminase' + ' gene expression' + 'drought stress' + 'plants' +'PGPR'	Google Scholar	Rhizosphere pseudomonads as probiotics improving plant health	Kim et al., 2018		Rejected	Duplicate
ACC-deaminase' + ' gene expression' + 'drought stress' + 'plants' +'PGPR'	Google Scholar	Potassium solubilizing and mobilizing microbes: Biodiversity, mechanisms of solubilization, and biotechnological implication for alleviations of abiotic stress	Kour et al., 2020		Rejected	book chapter
ACC-deaminase' + ' gene expression' + 'drought stress' + 'plants' +'PGPR'	Google Scholar	Phyto-Microbiome in Stress Regulation	Kumar et al., 2020		Rejected	Duplicate
ACC-deaminase' + ' gene expression' + 'drought stress' + 'plants' +'PGPR'	Google Scholar	Inner Plant Values: Diversity, Colonization and Benefits from Endophytic Bacteria	Liu et al., 2017	One of the most exciting scientific advances in recent decades has been the realization that the diverse and immensely active microbial communities are not only ‘passengers’ with plants, but instead play an important role in plant growth, development and resistance to biotic and abiotic stresses. A picture is emerging where plant roots act as ‘gatekeepers’ to screen soil bacteria from the rhizosp…	Rejected	review
ACC-deaminase' + ' gene expression' + 'drought stress' + 'plants' +'PGPR'	Google Scholar	Drought and Salinity Stress Responses and Microbe-Induced Tolerance in Plants	Ma et al., 2020	Drought and salinity are among the most important environmental factors that hampered agricultural productivity worldwide. Both stresses can induce several morphological, physiological, biochemical, and metabolic alterations through various mechanisms, eventually influencing plant growth, development, and productivity. The responses of plants to these stress conditions are highly complex and depe…	Rejected	review
ACC-deaminase' + ' gene expression' + 'drought stress' + 'plants' +'PGPR'	Google Scholar	Bacterial endophytes in agricultural crops and their role in stress tolerance: a review	MILIUTE et al., 2015	Bacterial endophytes are a class of endosymbiotic microorganisms widespread among plants that colonize intercellular and intracellular spaces of all plant compartments and do not cause plant disease or significant morphological changes. Plant and endophytic bacteria association includes vast diversity of bacterial taxa and plant hosts and in this review we present an overview of taxonomic composi…	Rejected	review
ACC-deaminase' + ' gene expression' + 'drought stress' + 'plants' +'PGPR'	Google Scholar	Plant growth promoting bacteria for combating salinity stress in plants – Recent developments and prospects: A review	Mishra et al., 2021	Soil salinity has emerged as a great threat to the agricultural ecosystems throughout the globe. Many continents of the globe are affected by salinity and crop productivity is severely affected. Anthropogenic activities leading to the degradation of agricultural land have also accelerated the rate of salinization in arid and semi-arid regions. Several approaches are being evaluated for remediatin…	Rejected	review
ACC-deaminase' + ' gene expression' + 'drought stress' + 'plants' +'PGPR'	Google Scholar	Amelioration of thermal stress in crops by plant growth-promoting rhizobacteria	Mitra et al., 2021	Crops are affected by various types of abiotic stress, resulting in a decrease in agricultural productivity thereby challenging food-security issues. Among the different types of abiotic stresses, the temperature has been regarded as a major one followed by salt and drought stress. The increasing temperature causes an alteration in the period of growth and the distribution of crop plants. High-te…	Rejected	review
ACC-deaminase' + ' gene expression' + 'drought stress' + 'plants' +'PGPR'	Google Scholar	Advances in the rhizosphere: stretching the interface of life	Mommer et al., 2016		Rejected	review
ACC-deaminase' + ' gene expression' + 'drought stress' + 'plants' +'PGPR'	Google Scholar	The Effects of Plant-Associated Bacterial Exopolysaccharides on Plant Abiotic Stress Tolerance	Morcillo et al., 2021	Plant growth-promoting rhizobacteria (PGPR) are beneficial soil microorganisms that can stimulate plant growth and increase tolerance to biotic and abiotic stresses. Some PGPR are capable of secreting exopolysaccharides (EPS) to protect themselves and, consequently, their plant hosts against environmental fluctuations and other abiotic stresses such as drought, salinity, or heavy metal pollution.…	Rejected	review
ACC-deaminase' + ' gene expression' + 'drought stress' + 'plants' +'PGPR'	Google Scholar	ROS Homeostasis in Abiotic Stress Tolerance in Plants	Nadarajah et al., 2020	Climate change-induced abiotic stress results in crop yield and production losses. These stresses result in changes at the physiological and molecular level that affect the development and growth of the plant. Reactive oxygen species (ROS) is formed at high levels due to abiotic stress within different organelles, leading to cellular damage. Plants have evolved mechanisms to control the productio…	Rejected	review
ACC-deaminase' + ' gene expression' + 'drought stress' + 'plants' +'PGPR'	Google Scholar	Microbial Metatranscriptomics Belowground	Nath et al., 2021		Rejected	Duplicate
ACC-deaminase' + ' gene expression' + 'drought stress' + 'plants' +'PGPR'	Google Scholar	Microbe-mediated amelioration of salinity stress in plants	Phurailatpam et al., 2021	Salinity, one of the major abiotic stresses faced by crop plants, is responsible for causing >20% loss in crop productivity worldwide. The elevated salt ion concentration (mainly Na+ and Cl-) in soil or water creates osmotic stress, oxidative stress and ion toxicity in plant cells. Salinity stress affects plant growth, development and survival by hampering seed germination, photosynthesis, water …	Rejected	review
ACC-deaminase' + ' gene expression' + 'drought stress' + 'plants' +'PGPR'	Google Scholar	Microbially Mediated Plant Salt Tolerance and Microbiome-based Solutions for Saline Agriculture	Qin et al., 2016	Soil salinization adversely affects plant growth and has become one of the major limiting factors for crop produc- tivity worldwide. The conventional approach, breeding salt-tolerant plant cultivars, has often failed to efficiently alleviate the situation. In contrast, the use of a diverse array of microorganisms harbored by plants has attracted increasing attention because of the remarkable bene…	Rejected	review
ACC-deaminase' + ' gene expression' + 'drought stress' + 'plants' +'PGPR'	Google Scholar	Can plant bio-regulators minimize crop productivity losses caused by drought, salinity and heat stress? An integrated review	Ratnakumar et al.,2016	Plant bio-regulators (PBRs), are biochemical compounds stimulates plant growth and productivity when applied, even in small quantities at appropriate plant growth stages. These are being extensively used in agriculture to enhance the productivity particularly in horticultural crops but are not as prevalent in field crops. Their central role in plant growth and development is through nutrient allo…	Rejected	review
ACC-deaminase' + ' gene expression' + 'drought stress' + 'plants' +'PGPR'	Google Scholar	Microbial modulation of plant ethylene signaling: ecological and evolutionary consequences	Ravanbakhsh et al., 2018	The plant hormone ethylene is one of the central regulators of plant development and stress resistance. Optimal ethylene signaling is essential for plant fitness and is under strong selection pressure. Plants upregulate ethylene production in response to stress, and this hormone triggers defense mechanisms. Due to the pleiotropic effects of ethylene, adjusting stress responses to maximize resista…	Rejected	review
ACC-deaminase' + ' gene expression' + 'drought stress' + 'plants' +'PGPR'	Google Scholar	Plant Growth Promoting Rhizobacteria and their Mechanisms Involved in Agricultural Crop Production: A Review	Rehman et al., 2020	On the basis of phenotypic and genetic diversity, it is very difficult to characterize the soil microbial communities. Bacteria that are associated with the plant roots and have ability to promote the growth of plant are called Plant Growth Promoting Rhizobacteria (PGPR). Firstly, these plant growth promoting rhizobacteria inhance the growth of the plant. Secondly, they have antagonistic activiti…	Rejected	review
ACC-deaminase' + ' gene expression' + 'drought stress' + 'plants' +'PGPR'	Google Scholar	Ethylene: A Master Regulator of Salinity Stress Tolerance in Plants	Riyazuddin et al., 2020	Salinity stress is one of the major threats to agricultural productivity across the globe. Research in the past three decades, therefore, has focused on analyzing the effects of salinity stress on the plants. Evidence gathered over the years supports the role of ethylene as a key regulator of salinity stress tolerance in plants. This gaseous plant hormone regulates many vital cellular processes s…	Rejected	review
ACC-deaminase' + ' gene expression' + 'drought stress' + 'plants' +'PGPR'	Google Scholar	Plant growth-promoting rhizobacteria act as biostimulants in horticulture	Ruzzi et al., 2015		Rejected	review
ACC-deaminase' + ' gene expression' + 'drought stress' + 'plants' +'PGPR'	Google Scholar	An overview on improvement of crop productivity in saline soils by halotolerant and halophilic PGPRs	Saghafi et al., 2019	Salinity of water and soil are of the most important factors limiting the production of crops. Moreover, with the increasing population of the planet and saline fields worldwide there is no choice but to use saline soil and water in the near future. Therefore, to increase plant growth under saline stress condition, provision of sustainable and environmentally friendly management for the use of sa…	Rejected	review
ACC-deaminase' + ' gene expression' + 'drought stress' + 'plants' +'PGPR'	Google Scholar	Facing Climate Change: Application of Microbial Biostimulants to Mitigate Stress in Horticultural Crops	Sangiorgio et al., 2020	In the current scenario of rapidly evolving climate change, crop plants are more frequently subjected to stresses of both abiotic and biotic origin, including exposure to unpredictable and extreme climatic events, changes in plant physiology, growing season and phytosanitary hazard, and increased losses up to 30% and 50% in global agricultural productions. Plants coevolved with microbial symbiont…	Rejected	review
ACC-deaminase' + ' gene expression' + 'drought stress' + 'plants' +'PGPR'	Google Scholar	Plant Growth Stimulation by Microbial Consortia	Santoyo et al., 2021	Plant-associated microorganisms play an important role in agricultural production. Al- though various studies have shown that single microorganisms can exert beneficial effects on plants, it is increasingly evident that when a microbial consortium—two or more interacting microorganisms— is involved, additive or synergistic results can be expected. This occurs, in part, due to the fact that multip…	Rejected	review
ACC-deaminase' + ' gene expression' + 'drought stress' + 'plants' +'PGPR'	Google Scholar	Microbial Diversity in Ecosystem Sustainability and Biotechnological Applications	Satyanarayana et al., 2019		Rejected	book
ACC-deaminase' + ' gene expression' + 'drought stress' + 'plants' +'PGPR'	Google Scholar	Bacillus species in soil as a natural resource for plant health and nutrition	Saxena et al., 2019	The genus Bacillus is one of the predominant bacterial genera found in soil, and several species of this genus have been reported from diverse ecological niches. Endowed with tremendous genetic and metabolic diversity, Bacillus spp. serve multiple ecological functions in soil ecosystem from nutrient cycling to conferring stress tolerance to plants. Members of the genus Bacillus are known to have …	Rejected	review
ACC-deaminase' + ' gene expression' + 'drought stress' + 'plants' +'PGPR'	Google Scholar	Microbe-Mediated Mitigation of Cadmium Toxicity in Plants	Shahid ET AL., 2019		Rejected	book chapter
ACC-deaminase' + ' gene expression' + 'drought stress' + 'plants' +'PGPR'	Google Scholar	Insights into the Bacterial and Nitric Oxide-Induced Salt Tolerance in Sugarcane and Their Growth-Promoting Abilities	Sharma et al.,2020	Soil salinity causes severe environmental stress that affects agriculture production and food security throughout the world. Salt-tolerant plant-growth-promoting rhizobacteria (PGPR) and nitric oxide (NO), a distinctive signaling molecule, can synergistically assist in the alleviation of abiotic stresses and plant growth promotion, but the mechanism by which this happens is still not well known. …	Rejected	Proteomic study
ACC-deaminase' + ' gene expression' + 'drought stress' + 'plants' +'PGPR'	Google Scholar	Plant-Growth-Promoting Bacteria Mitigating Soil Salinity Stress in Plants	Shilev et al., 2020	Soil deterioration has led to problems with the nutrition of the world’s population. As one of the most serious stressors, soil salinization has a negative effect on the quantity and quality of agricultural production, drawing attention to the need for environmentally friendly technologies to overcome the adverse effects. The use of plant-growth-promoting bacteria (PGPB) can be a key factor in re…	Rejected	review
ACC-deaminase' + ' gene expression' + 'drought stress' + 'plants' +'PGPR'	Google Scholar	Halotolerant Plant Growth Promoting Bacteria Mediated Salinity Stress Amelioration in Plants	Shin et al., 2016	Soil salinization refers to the buildup of salts in soil to a level toxic to plants. The major factors that contribute to soil salinity are the quality, the amount and the type of irrigation water used. The presented review discusses the different sources and causes of soil salinity. The effect of soil salinity on biological processes of plants is also discussed in detail. This is followed by a d…	Rejected	review
ACC-deaminase' + ' gene expression' + 'drought stress' + 'plants' +'PGPR'	Google Scholar	Mitigation of Abiotic Stress in Legume-Nodulating Rhizobia for Sustainable Crop Production	Sindhu et al., 2020	Rhizobia form nitrogen-fixing nodules on leguminous plants and convert atmospheric nitrogen to plant-utilizable ammonia resulting into increased plant growth and crop yield. The growth of crops and rhizobia is adversely affected by various abiotic stresses including high temperature, soil salinity and drought. Under saprophytic phase in the soil, free- living rhizobial population usually declines…	Rejected	review
ACC-deaminase' + ' gene expression' + 'drought stress' + 'plants' +'PGPR'	Google Scholar	The Multifarious PGPR Serratia marcescens CDP-13 Augments Induced Systemic Resistance and Enhanced Salinity Tolerance of Wheat (Triticum aestivum L.)	Singh et al., 2016	The present study demonstrates the plant growth promoting (PGP) potential of a bacterial isolate CDP-13 isolated from ‘Capparis decidua’ plant, and its ability to protect plants from the deleterious effect of biotic and abiotic stressors. Based on 16S rRNA gene sequence analysis, the isolate was identified as Serratia marcescens. Among the PGP traits, the iso- late was found to be positive for AC…	Rejected	Proteomic study
ACC-deaminase' + ' gene expression' + 'drought stress' + 'plants' +'PGPR'	Google Scholar	Signaling responses and their role in the mitigation of abiotic stresses	Tanpure et al., 2021		Rejected	book
ACC-deaminase' + ' gene expression' + 'drought stress' + 'plants' +'PGPR'	Google Scholar	Bacterial seed endophytes: genera, vertical transmission and interaction with plants	Truyens et al., 2014	Although the importance of plant-associated micro- organisms for plant growth and health was getting more recognition recently, the role of seed-associated microorganisms, and especially seed endophytic bacteria, still is underestimated. Nevertheless, these associations could be beneficial for germination and seedling establishment as seed endophytic bacteria are already present in these very ear…	Rejected	review
ACC-deaminase' + ' gene expression' + 'drought stress' + 'plants' +'PGPR'	Google Scholar	Plant Microbe Symbiosis	Varma et al., 2020		Rejected	book
ACC-deaminase' + ' gene expression' + 'drought stress' + 'plants' +'PGPR'	Google Scholar	Plant Growth Promoting Bacteria: Biodiversity and Multifunctional Attributes for Sustainable Agriculture	Yadav et al., 2017	The use of plant growth promoting bacteria may prove useful in developing strategies to facilitate plant growth under normal as well as diverse abiotic stress conditions. The application of microbes with the aim of improving nutrients availability for plants is an important practice and necessary for sustainable agriculture. During the past couple of decades, the use of microbial inoculants for s…	Rejected	review
ACC-deaminase' + ' gene expression' + 'drought stress' + 'plants' +'PGPR'	Google Scholar	Advances in Plant Microbiome and Sustainable Functional Annotation and Future Agriculture Challenges	Yadav et al., 2020		Rejected	book
ACC-deaminase' + ' gene expression' + 'drought stress' + 'plants' +'PGPR'	Google Scholar	Rhizobacteriome: Promising Candidate for Conferring Drought Tolerance in Crops	Yadav et al., 2020	Drought is a global water shortage problem which poses challenge to crop productivity. Novel strategies are being tried to find out solution to sustain agriculture under drought conditions. Rhizobacteriome is an exclusive genetic material of bacteria resident to rhizosphere plays critical role to health and yield of plant. The interaction of rhizobacteriome with plant provides basis for protectin…	Rejected	review
ACC-deaminase' + ' gene expression' + 'drought stress' + 'plants' +'PGPR'	Google Scholar	Toward the mitigation of biotic and abiotic stresses through plant growth promoting rhizobacteria	Zahedi et al., 2021		Rejected	book chapter
ACC-deaminase' + ' gene expression' + 'drought stress' + 'plants' +'PGPR'	Google Scholar	Improving crop drought resistance with plant growth regulators and rhizobacteria: Mechanisms, applications, and perspectives	Zhang et al., 2011	Drought is one of the main abiotic stresses that cause crop yield loss. Improving crop yield under drought stress is a major goal of crop breeding, as it is critical to food security. The mechanism of plant drought resistance has been well studied, and diverse drought resistance genes have been identified in recent years, but transferring this knowledge from the laboratory to field production rem…	Rejected	review
ACC-deaminase' + ' gene expression' + 'drought stress' + 'plants' +'PGPR'	Google Scholar	Potential of Azotobacter Salinestris as Plant Growth Promoting Rhizobacteria under Saline Stress Conditions	Omer et al., 2016	Rising soil salinity has been a major worldwide problem. This study was conducted to obtain Azotobacter cultures which can grow and produce plant growth promoting (PGP) activities under saline conditions with promising potential, as a bioinoculant for plants. The highly efficient isolate (19A) was selected from a total of twenty two rhizo bacterial isolates obtained from different geographic regi…	Rejected	Proteomic study
ACC-deaminase' + ' gene expression' + 'drought stress' + 'plants' +'PGPR'	Google Scholar	Bioaugmentation with copper tolerant endophyte Pseudomonas lurida strain EOO26 for improved plant growth and copper phytoremediation by Helianthus annuus	Kumar et al., 2020	Organic fertilizers became a better alternative to chemical fertilizers in modern agricultural practices however, contamination of copper (Cu) from organic fertilizer is still a major concern for the globe. Plant growth promoting (PGP) microorganisms showed their efficiency to combat with this problem and thus Cu tolerant PGP endophytes from roots of Odontarrhena obovata (Alyssum obovatum) growin…	Rejected	Proteomic study
ACC-deaminase' + ' gene expression' + 'drought stress' + 'plants' +'PGPR'	Google Scholar	Stress-tolerant antagonistic plant growth-promoting rhizobacteria from Zea mays	Kaur et al., 2017	Biological control of plant diseases is strongly emerging as an effective alternative to the use of chemical pesticides and fungicides. Stress tolerance is an important attribute in the selec- tion of bacteria for the development of microbial inoculants. Fourteen salt-tolerant bacte- ria showing different morphological features isolated from the rhizosphere of maize were evaluated for different p…	Rejected	Proteomic study
ACC-deaminase' + ' gene expression' + 'drought stress' + 'plants' +'PGPR'	Google Scholar	Preparing for the worst: Utilizing stress-tolerant soil microbial communities to aid ecological restoration in the Anthropocene	Valliere et al., 2020	1. Multiple drivers of environmental change pose a significant challenge for ecologi- cal restoration, including climate change, soil salinization and environmental pollution. Due to the important role that soil biota play in enabling plants to cope with a variety of abiotic stressors, there is growing interest in the use of microbial inoculations to facilitate native plant restoration in the fac…	Rejected	review
ACC-deaminase' + ' gene expression' + 'drought stress' + 'plants' +'PGPR'	Google Scholar	Halotolerant biofilm‐producing rhizobacteria mitigate seawater‐induced salt stress and promote growth of tomato	Haque et al., 2022	Biofilm‐producing rhizobacteria (BPR) enhance productivity and mitigate abiotic stresses in plants. This study showed that 21 out of 65 halotolerant rhizobacteria could build biofilms. The components of the biofilm matrices i.e., extracellular polymeric substances (EPS) are proteins, curli, nanocelloluse, nucleic acids, lipids, and peptidoglycans. Various functional groups including carbonyl, car…	Rejected	Proteomic study
ACC-deaminase' + ' gene expression' + 'drought stress' + 'plants' +'PGPR'	Google Scholar	Lentil (Lens culinaris L.) growth promoting rhizobacteria and their effect on nodulation in coinoculation with rhizobia	Seplveda-Caamaoetal et al., 2018	Lentil is cultivated in Chilean Mediterranean drylands, in areas with soils that are nutrient depleted and eroded. Inoculation of lentil with rhizobia in co- inoculation with growth promoting rhizobacteria would allow higher bio- mass and an opportunity for early nodulation and increased nitrogen fixa- tion. The objective of this research was to select rhizosferic bacteria (PGPR) from lentils and…	Rejected	Proteomic study
ACC-deaminase' + ' gene expression' + 'drought stress' + 'plants' +'PGPR'	Google Scholar	Comparative Transcriptomics and Metabolomics Reveal an Intricate Priming Mechanism Involved in PGPR-Mediated Salt Tolerance in Tomato	Mellidou et al., 2021	Plant-associated beneficial strains inhabiting plants grown under harsh ecosystems can help them cope with abiotic stress factors by positively influencing plant physiology, development, and environmental adaptation. Previously, we isolated a potential plant growth promoting strain (AXSa06) identified as Pseudomonas oryzihabitans, possessing 1-aminocyclopropane-1-carboxylate deaminase activity, p…	Rejected	No acdS expression
ACC-deaminase' + ' gene expression' + 'drought stress' + 'plants' +'PGPR'	Google Scholar	Synthesis of Indoleacetic Acid, Gibberellic Acid and ACC-Deaminase by Mortierella Strains Promote Winter Wheat Seedlings Growth under Different Conditions	Ozimek et al., 2018	The endogenous pool of phytoregulators in plant tissues supplied with microbial secondary metabolites may be crucial for the development of winter wheat seedlings during cool springs. The phytohormones may be synthesized by psychrotrophic microorganisms in lower temperatures occurring in a temperate climate. Two fungal isolates from the Spitzbergen soils after the microscopic observations and “th…	Rejected	Proteomic study
ACC-deaminase' + ' gene expression' + 'drought stress' + 'plants' +'PGPR'	Google Scholar	Influence of Brevibacterium linens RS16 on foliage photosynthetic and volatile emission characteristics upon heat stress in Eucalyptus grandis	Chatterjee et al., 2020	Heat stress induces secondary metabolic changes in plants, channeling photosynthetic carbon and energy, away from primary metabolic processes, including, growth. Use of ACC (1-aminocyclopropane- 1-carboxylate) deaminase containing plant growth promoting bacteria (PGPB) in conferring heat resistance in plants and the role of PGPB, in altering net carbon assimilation, constitutive and stress volati…	Rejected	Proteomic study
ACC-deaminase' + ' gene expression' + 'drought stress' + 'plants' +'PGPR'	Google Scholar	Root-associated microorganisms reprogram plant life history along the growth–stress resistance tradeoff	Ravanbakhsh et al., 2019.1	Growth–defense tradeoffs are a major constraint on plant evolution. While the genetics of resource allocation is well established, the regulatory role of plant-associated microorganisms is still unclear. Here, we demonstrate that plant- associated microorganisms can reposition the plant phenotype along the same growth–defense tradeoff that determines phenotypic effects of plant mutations. We grew…	Rejected	No abiotic stress
ACC-deaminase' + ' gene expression' + 'drought stress' + 'plants' +'PGPR'	Google Scholar	Rapid degradation of Pseudomonas fluorescens 1-aminocyclopropane-1-carboxylic acid deaminase proteinsexpressed in transgenic Arabidopsis	Kim et al., 2014	1-Aminocyclopropane-1-carboxylate (ACC) deaminase is commonly produced by plant growth-promoting rhizobacteria (PGPR) and has been suggested to facilitate the growth and stress tolerance of hosts via a reduction in levels of ethylene. However, the regulatory mechanism of ACC deaminase (AcdS) protein within host plant cells is largely unknown. Here, we demonstrated benefi- cial effects and post-tr…	Rejected	No drought stress
ACC-deaminase' + ' gene expression' + 'drought stress' + 'plants' +'PGPR'	Google Scholar	Screening, isolation and characterization of culturable stress-tolerant bacterial endophytes associated with Salicornia brachiata and their effect on wheat (Triticum aestivum L.) and maize (Zea mays) growth	Karnwal et al., 2019	Globally more than 5.2 billion hectares of farming fields are damaged through erosion, salinity and soil deterioration. Many salt stress tolerant bacteria have plant growth promoting (PGP) characteristics that can be used to overcome environmental stresses. Isolation and screening of salt-tolerant endophytes from Salicornia brachiata were achieved through surface sterili- zation of leaves followe…	Rejected	Proteomic study
ACC-deaminase' + ' gene expression' + 'drought stress' + 'plants' +'PGPR'	Google Scholar	Bacillus velezensis 5113 Induced Metabolic and Molecular Reprogramming during Abiotic Stress Tolerance in Wheat	Abd El-Daim et al., 2019	Abiotic stresses are main limiting factors for agricultural production around the world. Plant growth promoting rhizobacteria (PGPR) have been shown to improve abiotic stress tolerance in several plants. However, the molecular and physiological changes connected with PGPR priming of stress management are poorly understood. The present investigation aimed to explore major metabolic and molecular c…	Rejected	Proteomic study
ACC-deaminase' + ' gene expression' + 'drought stress' + 'plants' +'PGPR'	Google Scholar	Rhizosphere engineering: Enhancing sustainable plant ecosystem productivity	Ahkami et al., 2017.	The rhizosphere is arguably the most complex microbial habitat on earth, comprising an integrated network of plant roots, soil and a diverse microbial consortium of bacteria, archaea, viruses, and microeukaryotes. Understanding, predicting and controlling the structure and function of the rhizosphere will allow us to harness plant-microbe interactions and other rhizosphere activities as a means t…	Rejected	review
ACC-deaminase' + ' gene expression' + 'drought stress' + 'plants' +'PGPR'	Google Scholar	Enzymatic detoxification of azo dyes by a multifarious Bacillus sp. strain MR-1/2-bearing plant growth-promoting characteristics	Shahid et al., 2018	This study was conducted to elucidate the inherent potential of Bacillus sp. MR-1/2, which was isolated from root zone of maize crop grown on a textile wastewater-irrigated soil. The isolated strain was identified through its ribosomal RNA sequence. Under in vitro conditions, the strain demonstrated its tolerance for high concentrations of various heavy metal ions as determined by minimum inhibit…	Rejected	Proteomic study
ACC-deaminase' + ' gene expression' + 'drought stress' + 'plants' +'PGPR'	Google Scholar	Role of Ethylene Biosynthesis Genes in the Regulation of Salt Stress and Drought Stress Tolerance in Petunia	Naing et al., 2022	Ethylene plays a critical signaling role in the abiotic stress tolerance mechanism. However, the role of ethylene in regulating abiotic stress tolerance in petunia has not been well- investigated, and the underlying molecular mechanism by which ethylene regulates abiotic stress tolerance is still unknown. Therefore, we examined the involvement of ethylene in salt and drought stress tolerance of p…	Rejected	No acdS expression
ACC-deaminase' + ' gene expression' + 'drought stress' + 'plants' +'PGPR'	Google Scholar	Combined application of H2S and a plant growth promoting strain JIL321 regulates photosynthetic efficacy, soil enzyme activity and growth-promotion in rice under salt stress	Wang et al., 2022	Salinity stress is one of the most harmful abiotic stresses that inhibit crop growth and grain yield. In this study, a salt-tolerant bacterium was isolated from the soil of the rice rhizosphere and named Myroides sp. JIL321, based on the results of the phylogenetic tree analysis. The strain JIL321 tolerated up to 1, 283.37 mM of NaCl and exhibited positive plant growth-promoting traits, such as t…	Rejected	Proteomic study
ACC-deaminase' + ' gene expression' + 'drought stress' + 'plants' +'PGPR'	Google Scholar	Plant Growth-Promoting Halobacteria and Their Ability to Protect Crops from Abiotic Stress: An Eco-Friendly Alternative for Saline Soils	Hernández-Canseco et al., 2022		Rejected	Duplicate
ACC-deaminase' + ' gene expression' + 'drought stress' + 'plants' +'PGPR'	Google Scholar	Biochar characteristics relate to its utility as an alternative soil inoculum carrier to peat and vermiculite	Hale et al., 2015	Biochar materials have greatly variable physical and chemical properties, which will affect their abilities to serve as carriers for introducing bacteria into soils. Here we examined biochars made from 5 feed- stocks produced at 2 highest treatment temperatures (HTT's) by slow pyrolysis. Peat and vermiculite, which are traditional inoculum carriers, and liquid inoculum with no carrier, were inclu…	Rejected	No abiotic stress
ACC-deaminase' + ' gene expression' + 'drought stress' + 'plants' +'PGPR'	Google Scholar	Population diversity of bacterial endophytes from jute (Corchorus olitorius) and evaluation of their potential role as bioinoculants	Haidar et al., 2018	Endophytes are bacterial or fungal organisms associated with plants in an obligate or facultative manner. In order to maintain a stable symbiosis, many of the endophytes produce compounds that promote plant growth and help them adapt better to the environment. This study was conducted to explore the potential of jute bacterial endophytes for their growth promotion ability in direct and indirect w…	Rejected	No abiotic stress
ACC-deaminase' + ' gene expression' + 'drought stress' + 'plants' +'PGPR'	Google Scholar	Simultaneous mitigation of aluminum, salinity and drought stress in Lactuca sativa growth via formulated plant growth promoting Rhodotorula mucilaginosa CAM4	Silambarasan et al., 2019	In the present study, a potent Aluminum (Al) resistant yeast strain CAM4 was isolated from rhizosphere soil of Rubus geoides, grown in acidic Andisols and identified as Rhodotorula mucilaginosa by 18S rRNA gene sequence analysis. The strain CAM4 was selected in terms of abiotic stress tolerance to Al, salinity and drought with multiple plant growth promoting (PGP) traits. Besides, strain CAM4 als…	Rejected	Proteomic study
ACC-deaminase' + ' gene expression' + 'drought stress' + 'plants' +'PGPR'	Google Scholar	Plant growth promoting rhizobacteria improve the antioxidant status in Mentha piperita grown under drought stress leading to an enhancement of plant growth and total phenolic content	Chiappero et al., 2019	An experiment was conducted to investigate the effects of plant growth promoting rhizobacteria (PGPR) on Mentha piperita grown under drought stress. We performed root inoculation with strains of two PGPR species (Pseudomonas fluorescens WCS417 r and Bacillus amyloliquefaciens GB03) on peppermint plants and subjected them to moderate (MS) or severe drought stress (SS). To determine the growth-prom…	Rejected	Proteomic study
ACC-deaminase' + ' gene expression' + 'drought stress' + 'plants' +'PGPR'	Google Scholar	Serpentine endophytic bacterium Pseudomonas azotoformans ASS1 accelerates phytoremediation of soil metals under drought stress	Ma et al., 2017	This study evaluates the potential of serpentine endophytic bacterium to foster phytoremediation effi- ciency of Trifolium arvense grown on multi-metal (Cu, Zn and Ni) contaminated soils under drought stress. A drought resistant endophytic bacterial strain ASS1 isolated from the leaves of Alyssum serpyllifolium grown in serpentine soils was identified as Pseudomonas azotoformans based on biochemi…	Rejected	Proteomic study
ACC-deaminase' + ' gene expression' + 'drought stress' + 'plants' +'PGPR'	Google Scholar	Characterisation of Pseudomonas spp. and Ochrobactrum sp. isolated from volcanic soil	Mishra et al., 2017	Soil bacteria may have properties of plant growth promotion but not be sufficiently beneficial for plants under stress conditions. This challenge has led researchers to extend their searches into extreme environments for potential soil bacteria with multiple plant beneficial traits as well as abiotic stress tolerance abilities. In the current study, an attempt was made to evaluate soil bacteria f…	Rejected	Proteomic study
ACC-deaminase' + ' gene expression' + 'drought stress' + 'plants' +'PGPR'	Google Scholar	Transcriptional alterations reveal Bacillus amyloliquefaciens-rice cooperation under salt stress	Chauhan et al., 2019	the Bacillus amyloliquefaciens-SN13 and model crop rice (Oryza sativa) were chosen to understand the complex regulatory networks that govern plant-PGPR interaction under salt stress. During stress, inoculation with SN13 significantly increased biomass, relative water content, proline and total soluble sugar in rice while decreased lipid peroxidation and electrolyte leakage. Extensive alterations …	Rejected	No acdS expression
ACC-deaminase' + ' gene expression' + 'drought stress' + 'plants' +'PGPR'	Google Scholar	Endophytes from Maize with Plant Growth Promotion and Biocontrol Activity under Drought Stress	Sandhya et al., 2017	In the present study, 39 endophytic bacteria were isolated from different crops with main focus on maize roots and seeds. Endophytes were screened for drought stress tolerance, plant growth promoting (PGP) traits and antifungal activity. Out of 39 isolates, 32 could show drought tolerance up to –1.02 matric potential (MPa) and exhibited most of the plant growth promoting traits. But, only five is…	Rejected	Proteomic study
ACC-deaminase' + ' gene expression' + 'drought stress' + 'plants' +'PGPR'	Google Scholar	Plant growth-promoting actinobacteria: a new strategy for enhancing sustainable production and protection of grain legumes	Sathya et al., 2017	Grain legumes are a cost-effective alternative for the animal protein in improving the diets of the poor in South-East Asia and Africa. Legumes, through symbiotic nitrogen fixation, meet a major part of their own N demand and partially benefit the following crops of the system by enriching soil. In realization of this sustainability advantage and to promote pulse production, United Nations had de…	Rejected	review
ACC-deaminase' + ' gene expression' + 'drought stress' + 'plants' +'PGPR'	Google Scholar	Bacteria from tropical semiarid temporary ponds promote maize growth under hydric stress	de Araújo et al., 2020	World climate change has triggered soil water stress and imposed limitations on agricultural production. Plant growth-promoting bacteria (PGPBs) have been an efficient strategy to improve the biological supply and growth of plants under distinct abiotic stress conditions. We hypothesized that the soils from a temporary pond may harbor PGPBs with potential strains which increase maize tolerance to…	Rejected	Proteomic study
ACC-deaminase' + ' gene expression' + 'drought stress' + 'plants' +'PGPR'	Google Scholar	Changes in gene expression in Camelina sativa roots and vegetative tissues in response to salinity stress	Heydarian et al., 2018	The response of Camelina sativa to salt stress was examined. Salt reduced shoot, but not root length. Root and shoot weight were affected by salt, as was photosynthetic capacity. Salt did not alter micro- element concentration in shoots, but increased macro-element (Ca and Mg) levels. Gene expression patterns in shoots indicated that salt stress may have led to shuttling of Na+ from the cytoplasm…	Rejected	No i PGPRs
ACC-deaminase' + ' gene expression' + 'drought stress' + 'plants' +'PGPR'	Google Scholar	Whole-genome sequencing and comparative analysis of two plant-associated strains of Rhodopseudomonas palustris (PS3 andYSC3)	Lo et al., 2018	Rhodopseudomonas palustris strains PS3 andYSC3 are purple non-sulfur phototrophic bacteria isolated from Taiwanese paddy soils. PS3 has beneficial effects on plant growth and enhances the uptake efficiency of applied fertilizer nutrients. In contrast, YSC3 has no significant effect on plant growth. The genomic structures of PS3 andYSC3 are similar; each contains one circular chromosome that is 5,…	Rejected	No abiotic stress
ACC-deaminase' + ' gene expression' + 'drought stress' + 'plants' +'PGPR'	Google Scholar	The Role of Ethylene and Wound Signaling in Resistance of Tomato to Botrytis cinerea	Dìaz et al., 2002	Ethylene, jasmonate, and salicylate play important roles in plant defense responses to pathogens. To investigate the contributions of these compounds in resistance of tomato (Lycopersicon esculentum) to the fungal pathogen Botrytis cinerea, three types of experiments were conducted: (a) quantitative disease assays with plants pretreated with ethylene, inhibitors of ethylene perception, or salicyl…	Rejected	Biotic stress
ACC-deaminase' + ' gene expression' + 'drought stress' + 'plants' +'PGPR'	Google Scholar	Phomopsis Liquidambaris Contributes to the Decease of Ethylene Biosynthesis in Rice under Salt Stress via Inhibiting the Activity of 1- Aminocyclopropane-1-Carboxylate Deaminase	Siddikee	The endophytic fungus Phomopsis liquidambaris is characterized as a plant growth-promoting agent under salt stress, but its mechanism is unknown. Herein, 1-Aminocyclopropane-1-Carboxylate Deaminase (ACCD) from the strain was con	Rejected	Duplicate
ACC-deaminase' + ' gene expression' + 'drought stress' + 'plants' +'PGPR'	Google Scholar	Ethylene induced plant stress tolerance by Enterobacter sp. SA187 is mediated by 2-keto- 4-methylthiobutyric acid production	de Ze ́ licourt et al., 2018	Several plant species require microbial associations for survival under different biotic and abiotic stresses. In this study, we show that Enterobacter sp. SA187, a desert plant endo- phytic bacterium, enhances yield of the crop plant alfalfa under field conditions as well as growth of the model plant Arabidopsis thaliana in vitro, revealing a high potential of SA187 as a biological solution for …	Rejected	No espressione acdS
ACC-deaminase' + ' gene expression' + 'drought stress' + 'plants' +'PGPR'	Google Scholar	Antifungal potential evaluation and alleviation of salt stress in tomato seedlings by a halotolerant plant growth-promoting actinomycete Streptomyces sp. KLBMP5084	Gong et al., 2020	Salt stress affects plant growth and crop yield reduction, thus how to improve the salt tolerance of plants is full of challenges. Plant growth-promoting rhizobacteria (PGPR), as an environment-friendly treatment to improve salt stress tolerance of plants is widely accepted and has big potential in field application. In this study, a halotolerant actinomycete Streptomyces sp. KLBMP5084 obtained f…	Rejected	Fungi
ACC-deaminase' + ' gene expression' + 'drought stress' + 'plants' +'PGPR'	Google Scholar	Halotolerant Bacterial Diversity Associated with Suaeda fruticosa (L.) Forssk. Improved Growth of Maize under Salinity Stress	Aslam et al., 2018	Halotolerant bacterial strains associated with the rhizosphere and phytoplane of Suaeda fruticosa (L.) Forssk. growing in saline habitats were isolated to mitigate the salinity stress of Zea mays L. 16S rRNA gene sequencing confirmed the presence of strains that belong to Gracilibacillus, Staphylococcus, Virgibacillus, Salinicoccus, Bacillus, Zhihengliuella, Brevibacterium, Oceanobacillus, Exiguo…	Rejected	proteomic study
ACC-deaminase' + ' gene expression' + 'drought stress' + 'plants' +'PGPR'	Google Scholar	The roots of the halophyte Salicornia brachiata are a source of new halotolerant diazotrophic bacteria with plant growth-promoting potential	Jha et al., 2012	Soil salinity is the major cause limiting plant productivity worldwide. Nitrogen-fixing bacteria were enriched and characterised from roots of Salicornia brachiata, an extreme halophyte which has substantial economic value as a bioresource of diverse and valuable products. Nitrogen-free semisolid NFb medium with malate as carbon source and up to 4% NaCl were used for enrichment and isolation of d…	Rejected	No drought stress
ACC-deaminase' + ' gene expression' + 'drought stress' + 'plants' +'PGPR'	Google Scholar	INDUCING DROUGHT TOLERANCE IN WHEAT THROUGH COMBINED USE OF L-TRYPTOPHAN AND Pseudomonas fluorescens	Jamil et al., 2018	Auxins, as phytohormones and osmo-protectant, play important role to alleviate the adverse effect of drought stress on plant growth. Some bacteria equipped with ACC-deaminase activity along with some other growth promoting traits are helpful in improving plant growth under stresses. The efficiency of these bacteria is further improved when inoculation is supplemented with exogenous plant growth r…	Rejected	proteomic study
ACC-deaminase' + ' gene expression' + 'drought stress' + 'plants' +'PGPR'	Google Scholar	Characterization of Selected Plant Growth-Promoting Rhizobacteria and Their Non-Host Growth Promotion Effects	Fan and Smith, 2021	Plant growth-promoting rhizobacteria (PGPR) are a functionally diverse group of microbes having immense potential as biostimulants and biopesticides. We isolated four PGPR (designated n, L, K, and Y) that confer growth-promoting effects on Arabidopsis thaliana. The present study describes the detailed polyphasic characteriza- tion of these PGPR. Classical methods of bacterial identification and b…	Rejected	proteomic study
ACC-deaminase' + ' gene expression' + 'drought stress' + 'plants' +'PGPR'	Google Scholar	Pseudomonas-Mediated Mitigation of Salt Stress and Growth Promotion in Glycine max	Kasotia et al., 2015	In the present investigation we emphasized the role of plant growth-promoting bacterium to characterize activities of stress-associated enzymes, proline accumulation, chlorophyll estimation, and Na?/K? ratio in Glycine max L. Merrill under salt stress. The results showed that inoculation of plants with Pseudomonas koreensis strain AK-1 (MTCC no. 12058) grown under salt treatment induced growth pr…	Rejected	proteomic study
ACC-deaminase' + ' gene expression' + 'drought stress' + 'plants' +'PGPR'	Google Scholar	Bioprospecting of a Novel Plant Growth-Promoting Bacterium Bacillus altitudinis KP-14 for Enhancing Miscanthus × giganteus Growth in Metals Contaminated Soil	Pranaw et al., 2020	Use of plant growth-promoting bacteria (PGPB) for cultivation of the biofuel crop Miscanthus × giganteus (Mxg) in post-military and post-mining sites is a promising approach for the bioremediation of soils contaminated by metals. In the present study, PGPB were isolated from contaminated soil and screened for tolerance against abiotic stresses caused by salinity, pH, temperature, and lead (Pb). S…	Rejected	proteomic study
ACC-deaminase' + ' gene expression' + 'drought stress' + 'plants' +'PGPR'	Google Scholar	Isolation and characterization of endophytic plant growth- promoting bacteria from date palm tree (Phoenix dactylifera L.) and their potential role in salinity tolerance	Yaish et al.,2015	Endophytic bacteria were isolated from date palm (Phoenix dactylifera L.) seedling roots, characterized and tested for their ability to help plants grow under saline conditions. Molecular characterization showed that the majority of these strains belonged to the genera Bacillus and Enterobacter and had different degrees of resistance to various antibiotics. Some of these strains were able to prod…	Rejected	proteomic study
ACC-deaminase' + ' gene expression' + 'drought stress' + 'plants' +'PGPR'	Google Scholar	Growth stimulation and alleviation of salinity stress to wheat by the biofilm forming Bacillus pumilus strain FAB10	Ansari et al., 2019	Salinity ranks among the most severe environmental stressors that limit crop productivity. Use of microbial inoculants with desired traits is believed to be effective strategy to combat plant abiotic stress. Therefore, the objective was to isolate salt tolerant Bacillus spp. with multifunctional plant growth promoting traits including biofilm development and to evaluate its performance under salt…	Rejected	proteomic study
ACC-deaminase' + ' gene expression' + 'drought stress' + 'plants' +'PGPR'	Google Scholar	Gibberellin secreting rhizobacterium, Pseudomonas putida H-2-3 modulates the hormonal and stress physiology of soybean to improve the plant growth under saline and drought conditions	Kang et al., 2014	The physiological changes in tolerant soybean plants under salt and drought stress conditions with Pseudomonas putida H-2-3 were investigated. A bacterial isolate H-2-3 was isolated from soil and identified as Pseudomonas putida H-2-3 by 16S rDNA sequences. The treatment of P. putida H-2-3 significantly increased the length, fresh and dry weight of shoot and chlorophyll content in gibberellins (G…	Rejected	No acdS expression
ACC-deaminase' + ' gene expression' + 'drought stress' + 'plants' +'PGPR'	Google Scholar	Isolation and Screening of 1-aminocyclopropane-1-carboxylic acid (ACC) deaminase producing PGPR from Paeonia lactiflora rhizosphere and enhancement of plant growth	Yuan et al., 2022	Plant growth-promoting rhizobacteria (PGPR) work in a variety of ways to promote plant growth and increase crop yield. They’ve recently gotten a lot of attention in crops, but not so much in ornamental plants. In this study, 13 PGPR strains containing 1-aminocyclopropane-1-carboxylic acid (ACC) deaminase named YDSY1-13 were isolated from the rhizosphere soil of four Paeonia lactiflora cultivars u…	Rejected	No abiotic stress
acds AND gene AND expression AND drought AND stress AND plants AND pgpr	Scopus	Soybean abiotic stress tolerance is improved by beneficial rhizobacteria in biosolids-amended soil	McMillan et al., 2022		Rejected	Duplicate
acds AND gene AND expression AND drought AND stress AND plants AND pgpr	Scopus	A fruitful decade of bacterial ACC deaminase biotechnology: a pragmatic approach towards abiotic stress relief in plants	Moon et al., 2022		Rejected	Duplicate
acds AND gene AND expression AND drought AND stress AND plants AND pgpr	Scopus	Root-Derived Endophytic Diazotrophic Bacteria Pantoea cypripedii AF1 and Kosakonia arachidis EF1 Promote Nitrogen Assimilation and Growth in Sugarcane	Singh et al., 2021	Excessive, long-term application of chemical fertilizers in sugarcane crops disrupts soil microbial flora and causes environmental pollution and yield decline. The role of endophytic bacteria in improving crop production is now well-documented. In this study, we have isolated and identified several endophytic bacterial strains from the root tissues of five sugarcane species. Among them, eleven Gr…	rejected	proteomic study
acds AND gene AND expression AND drought AND stress AND plants AND pgpr	Scopus	Pseudomonas 1‐aminocyclopropane‐1‐carboxylate (Acc) deaminase and its role in beneficial plant‐microbe interactions	Glick et al., 2021		Rejected	Duplicate
acds AND gene AND expression AND drought AND stress AND plants AND pgpr	Scopus	Multifarious effect of ACC deaminase and EPS producing Pseudomonas sp. and Serratia marcescens to augment drought stress tolerance and nutrient status of wheat	Khan et al., 2021		Rejected	Duplicate
acds AND gene AND expression AND drought AND stress AND plants AND pgpr	Scopus	The ACC deaminase-producing plant growth-promoting bacteria: Influences of bacterial strains and ACC deaminase activities in plant tolerance to abiotic stress	Naing et al., 2021		Rejected	Duplicate
acds AND gene AND expression AND drought AND stress AND plants AND pgpr	Scopus	In vitro compatibility evaluation of agriusable nanochitosan on beneficial plant growth-promoting rhizobacteria and maize plant	Agri et al., 2021		Rejected	Duplicate
acds AND gene AND expression AND drought AND stress AND plants AND pgpr	Scopus	Overexpression of 1-Aminocyclopropane-1-Carboxylic Acid Deaminase (acdS) Gene in Petunia hybrida Improves Tolerance to Abiotic Stresses	Naing et al., 2021		Rejected	Duplicate
acds AND gene AND expression AND drought AND stress AND plants AND pgpr	Scopus	Deciphering distinct biological control and growth promoting potential of multi-stress tolerant Bacillus subtilis PM32 for potato stem canker	Mehmood et al., 2021		Rejected	Duplicate
acds AND gene AND expression AND drought AND stress AND plants AND pgpr	Scopus	Microbial enzyme, 1-aminocyclopropane-1-carboxylic acid (ACC) deaminase: An elixir for plant under stress	Jha et al., 2021	Ethylene, being deleterious to plant in some instances like stress, is essential for ripening of fruits, overcoming seed dormancy and initiation of germination, however, ethylene can inhibit root elongation post germination. For plants, 1-aminocyclopropane-1-carboxylic acid (ACC) serves as precursor of ethylene however, for microbes ACC acts as chemoattractant. This establishes a scenario in the …	Rejected	review
acds AND gene AND expression AND drought AND stress AND plants AND pgpr	Scopus	Alleviation of salt stress in wheat seedlings via multifunctional bacillus aryabhattai pm34: An in-vitro study	Mehmood et al., 2021		Rejected	Duplicate
acds AND gene AND expression AND drought AND stress AND plants AND pgpr	Scopus	Evaluation of indigenous olive biocontrol rhizobacteria as protectants against drought and salt stress	Montes-Osuna et al., 2021	Stress caused by drought and salinity may compromise growth and productivity of olive (Olea europaea L.) tree crops. Several studies have reported the use of beneficial rhizobacteria to alleviate symptoms produced by these stresses, which is attributed in some cases to the activity of 1- aminocyclopropane-1-carboxylic acid deaminase (ACD). A collection of beneficial olive rhizobacteria was in vit…	Rejected	no acdS expression
acds AND gene AND expression AND drought AND stress AND plants AND pgpr	Scopus	Whole Genome Analysis of Sugarcane Root-Associated Endophyte Pseudomonas aeruginosa B18—A Plant Growth-Promoting Bacterium With Antagonistic Potential Against Sporisorium scitamineum	Singh et al., 2021	Sugarcane smut is a significant fungal disease that causes a major loss in sugar yield and quality. In this study, we isolated an endophytic strain B18 from a sugarcane root, which showed plant growth-promotion, hydrolytic enzyme production, antifungal activity against sugarcane pathogens (Sporisorium scitamineum, Ceratocystis paradoxa, Fusarium verticillioides), and the presence of nifH, acdS, a…	rejected	no acdS expression
acds AND gene AND expression AND drought AND stress AND plants AND pgpr	Scopus	1-Aminocyclopropane-1-carboxylate (ACC) Deaminase Gene in Pseudomonas azotoformans Is Associated with the Amelioration of Salinity Stress in Tomato	Liu et al., 2021		Rejected	Duplicate
acds AND gene AND expression AND drought AND stress AND plants AND pgpr	Scopus	Dual Microbial Inoculation, a Game Changer? – Bacterial Biostimulants With Multifunctional Growth Promoting Traits to Mitigate Salinity Stress in Spring Mungbean	Kumawat et al., 2021	Soil microbes play a vital role in improving plant growth, soil health, ameliorate biotic/abiotic stress and enhance crop productivity. The present study was aimed to investigate a coordinated effect of compatible consortium [salt tolerating Rhizobium and rhizobacterium with 1-aminocyclopropane-1-carboxylate (ACC) deaminase] in enhancing plant growth promoting (PGP) traits, symbiotic efficiency, …	rejected	no acdS expression
acds AND gene AND expression AND drought AND stress AND plants AND pgpr	Scopus	Jasmonates, ethylene and brassinosteroids control adventitious and lateral rooting as stress avoidance responses to heavy metals and metalloids	Betti et al., 2021	Developmental and environmental signaling networks often converge during plant growth in response to changing conditions. Stress-induced hormones, such as jasmonates (JAs), can influence growth by crosstalk with other signals like brassinosteroids (BRs) and ethylene (ET). Nevertheless, it is unclear how avoidance of an abiotic stress triggers local changes in development as a response. It is know…	Rejected	review
acds AND gene AND expression AND drought AND stress AND plants AND pgpr	Scopus	Root colonizing Burkholderia sp. AQ12 enhanced rice growth and upregulated tillering-responsive genes in rice	Maqsood et al., 2021		Rejected	Duplicate
acds AND gene AND expression AND drought AND stress AND plants AND pgpr	Scopus	Exogenous acc deaminase is key to improving the performance of pasture Legume-Rhizobial symbioses in the presence of a high manganese concentration	Paço et al., 2020		Rejected	Duplicate
acds AND gene AND expression AND drought AND stress AND plants AND pgpr	Scopus	Complete Genome Sequence of Enterobacter roggenkampii ED5, a Nitrogen Fixing Plant Growth Promoting Endophytic Bacterium With Biocontrol and Stress Tolerance Properties, Isolated From Sugarcane Root	Guo et al., 2020		Rejected	Duplicate
acds AND gene AND expression AND drought AND stress AND plants AND pgpr	Scopus	Multi-stress tolerant PGPR Bacillus xiamenensis PM14 activating sugarcane (Saccharum officinarum L.) red rot disease resistance	Amna et al., 2020		Rejected	Duplicate
acds AND gene AND expression AND drought AND stress AND plants AND pgpr	Scopus	Rhizobacteria-induced systemic tolerance against drought stress in Sorghum bicolor (L.) Moench	Carlson et al., 2020		Rejected	Duplicate
acds AND gene AND expression AND drought AND stress AND plants AND pgpr	Scopus	Unravelling the biochemistry and genetics of ACC deaminase-An enzyme alleviating the biotic and abiotic stress in plants	Gupta et al., 2019		Rejected	Duplicate
acds AND gene AND expression AND drought AND stress AND plants AND pgpr	Scopus	Isolation, identification, and detection of ACC deaminase gene-encoding rhizobacteria from rhizosphere of stressed pineapple	Jaya et al., 2019		Rejected	Duplicate
acds AND gene AND expression AND drought AND stress AND plants AND pgpr	Scopus	Drought-Tolerant Pseudomonas spp. Improve the Growth Performance of Finger Millet (Eleusine coracana (L.) Gaertn.) Under Non-Stressed and Drought-Stressed Conditions	Chandra et al., 2018
acds AND gene AND expression AND drought AND stress AND plants AND pgpr	Scopus	In silico structural and functional analysis of Mesorhizobium ACC deaminase	Pramanik et al., 2017	Nodulation is one of the very important processes of legume plants as it is the initiating event of fixing nitrogen. Although ethylene has essential role in normal plant metabolism but it has also negative impact on plants particularly in nodule formation in legume plants. It is also produced due to a variety of biotic or abiotic stresses. 1-aminocyclopropane-1-carboxylic acid (ACC) deaminase is …	Rejected	no abiotic stress
acds AND gene AND expression AND drought AND stress AND plants AND pgpr	Scopus	Properties of Astragalus sp. microsymbionts and their putative role in plant growth promotion	Wdowiak et al., 2016		Rejected	Duplicate
acds AND gene AND expression AND drought AND stress AND plants AND pgpr	Scopus	Expression on roots and contribution to maize phytostimulation of 1-aminocyclopropane-1-decarboxylate deaminase gene acdS in Pseudomonas fluorescens F113	Vacheron et al.,2016		Rejected	Duplicate
acds AND gene AND expression AND drought AND stress AND plants AND pgpr	Scopus	Inoculation of soil with plant growth promoting bacteria producing 1-aminocyclopropane-1-carboxylate deaminase or expression of the corresponding acdS gene in transgenic plants increases salinity tolerance in Camelina sativa	Heydarian et al., 2016	Camelina sativa (camelina) is an oilseed crop touted for use on marginal lands; however, it is no more tolerant of soil salinity than traditional crops, such as canola. Plant growth-promoting bacteria (PGPB) that produce 1-aminocyclopropane-1-carboxylate deaminase (ACC deaminase) facilitate plant growth in the presence of abiotic stresses by reducing stress ethylene. Rhizospheric and endophytic P…	accepted
acds AND gene AND expression AND drought AND stress AND plants AND pgpr	Scopus	Differentiation of 1-aminocyclopropane-1-carboxylate (ACC) deaminase from its homologs is the key for identifying bacteria containing ACC deaminase	Li et al., 2015		Rejected	Duplicate
acds AND gene AND expression AND drought AND stress AND plants AND pgpr	Scopus	Effect of mustard rhizobacteria on wheat growth promotion under cadmium stress: characterization of acdS gene coding ACC deaminase	Govindasamy et al., 2015		Rejected	Duplicate
acds AND gene AND expression AND drought AND stress AND plants AND pgpr	Scopus	Corrigendum to "Biochemistry and genetics of ACC deaminase: A weapon to "stress ethylene" produced in plants	Singh et al.,2015		Rejected	Duplicate
acds AND gene AND expression AND drought AND stress AND plants AND pgpr	Scopus	Recent developments in use of 1-aminocyclopropane-1-carboxylate (ACC) deaminase for conferring tolerance to biotic and abiotic stress	Gontia-Mishra et al., 2014		Rejected	Duplicate
acds AND gene AND expression AND drought AND stress AND plants AND pgpr	Scopus	Acc deaminase activity in avirulent agrobacterium tumefaciens D3	Hao et al., 2011		Rejected	Duplicate
acds AND gene AND expression AND drought AND stress AND plants AND pgpr	Scopus	Bacterial Modulation of the Plant Ethylene Signaling Pathway Improves Tolerance to Salt Stress in Lettuce (Lactuca sativa L.)	Fortt et al., 2022		Rejected	Duplicate
acds AND gene AND expression AND drought AND stress AND plants AND pgpr	Scopus	Bacillus mycoides PM35 Reinforces Photosynthetic Efficiency, Antioxidant Defense, Expression of Stress-Responsive Genes, and Ameliorates the Effects of Salinity Stress in Maize	Ali et al., 2022		Rejected	Duplicate
acds AND gene AND expression AND drought AND stress AND plants AND pgpr	Scopus	A fruitful decade of bacterial ACC deaminase biotechnology: a pragmatic approach towards abiotic stress relief in plants	Moon et al., 2022		Rejected	Duplicate
acds AND gene AND expression AND drought AND stress AND plants AND pgpr	Scopus	Pseudomonas 1‐aminocyclopropane‐1‐carboxylate (Acc) deaminase and its role in beneficial plant‐microbe interactions	Glick et al., 2021		Rejected	Duplicate
acds AND gene AND expression AND drought AND stress AND plants AND pgpr	Scopus	Overexpression of 1-Aminocyclopropane-1-Carboxylic Acid Deaminase (acdS) Gene in Petunia hybrida Improves Tolerance to Abiotic Stresses	Naing et al., 2021		Rejected	Duplicate
acds AND gene AND expression AND drought AND stress AND plants AND pgpr	Scopus	Seed inoculation of desert-plant growth-promoting rhizobacteria induce biochemical alterations and develop resistance against water stress in wheat	Zia et al., 2021		Rejected	Duplicate
acds AND gene AND expression AND drought AND stress AND plants AND pgpr	Scopus	Root colonizing Burkholderia sp. AQ12 enhanced rice growth and upregulated tillering-responsive genes in rice	Maqsood et al., 2021		Rejected	Duplicate
acds AND gene AND expression AND drought AND stress AND plants AND pgpr	Scopus	Biofilm Producing Rhizobacteria With Multiple Plant Growth-Promoting Traits Promote Growth of Tomato Under Water-Deficit Stress	Haque et al., 2020	Plant growth-promoting rhizobacteria (PGPR) not only enhance plant growth but also control phytopathogens and mitigate abiotic stresses, including water-deficit stress. In this study, 21 (26.9%) rhizobacterial strains isolated from drought-prone ecosystems of Bangladesh were able to form air–liquid (AL) biofilms in the glass test tubes containing salt-optimized broth plus glycerol (SOBG) medium. …	Rejected	Proteomic study
acds AND gene AND expression AND drought AND stress AND plants AND pgpr	Scopus	Streptomyces alleviate drought stress in tomato plants and modulate the expression of transcription factors ERF1 and WRKY70 genes	Abbasi et al., 2020		Rejected	Duplicate
acds AND gene AND expression AND drought AND stress AND plants AND pgpr	Scopus	Enhancement of growth and salt tolerance of rice seedlings (Oryza sativa L.) by regulating ethylene production with a novel halotolerant PGPR strain Glutamicibacter sp. YD01 containing ACC deaminase activity	Ji et al., 2020		Rejected	Duplicate
acds AND gene AND expression AND drought AND stress AND plants AND pgpr	Scopus	Field performance of bacterial inoculants to alleviate water stress effects in wheat (Triticum aestivum L.)	Chandra et al., 2019		Rejected	Duplicate
acds AND gene AND expression AND drought AND stress AND plants AND pgpr	Scopus	Mechanisms of the IAA and ACC-deaminase producing strain of Trichoderma longibrachiatum T6 in enhancing wheat seedling tolerance to NaCl stress	Zhang et al., 2019		Rejected	Fungi
acds AND gene AND expression AND drought AND stress AND plants AND pgpr	Scopus	Southern blight disease of tomato control by 1-aminocyclopropane-1-carboxylate (ACC) deaminase producing Paenibacillus lentimorbus B-30488	Dixit et al., 2016		Rejected	Duplicate
acds AND gene AND expression AND drought AND stress AND plants AND pgpr	Scopus	Inoculation of soil with plant growth promoting bacteria producing 1-aminocyclopropane-1-carboxylate deaminase or expression of the corresponding acdS gene in transgenic plants increases salinity tolerance in Camelina sativa	Heydarian et al., 2016		Rejected	Duplicate
acds AND gene AND expression AND drought AND stress AND plants AND pgpr	Scopus	Differentiation of 1-aminocyclopropane-1-carboxylate (ACC) deaminase from its homologs is the key for identifying bacteria containing ACC deaminase	Li et al., 2015		Rejected	Duplicate
acds AND gene AND expression AND drought AND stress AND plants AND pgpr	Scopus	Biochemistry and genetics of ACC deaminase: A weapon to "stress ethylene" produced in plants	Singh et al., 2015		Rejected	Duplicate
acds AND gene AND expression AND drought AND stress AND plants AND pgpr	Scopus	Recent developments in use of 1-aminocyclopropane-1-carboxylate (ACC) deaminase for conferring tolerance to biotic and abiotic stress	Gontia-Mishra et al., 2014		Rejected	Duplicate
acds AND gene AND expression AND drought AND stress AND plants AND pgpr	Scopus	Trichoderma-Plant Root Colonization: Escaping Early Plant Defense Responses and Activation of the Antioxidant Machinery for Saline Stress Tolerance	Brotman et al., 2013		Rejected	Duplicate
acds AND gene AND expression AND drought AND stress AND plants AND pgpr	Scopus	Manipulation of ethylene synthesis in roots through bacterial ACC deaminase for improving nodulation in legumes	Shaharoona et al., 2011		Rejected	Duplicate
acds AND gene AND expression AND drought AND stress AND plants AND pgpr	Scopus	Regulation of expression of the prb-1b / ACC deaminase gene by UV-B in transgenic tomatoes	Tamot et al., 2003		Rejected	Duplicate
