# Supplementary material for: Meta-analysis of plant growth-promoting rhizobacteria interaction with host plants: implications for drought stress response gene expression
Source: Front Plant Sci. 2024 Jan 15;14:1282553. doi: 10.3389/fpls.2023.1282553 (PMC10823023; doi:10.3389/fpls.2023.1282553)
Supplement: Supplementary file 22 [file Table_7.xlsx]

## Sheet: Foglio1
Keywords	Source	Title	Author	Abstract	Accepted/Rejected	Reason
ACO' + 'gene expression'+ 'drought stress' ' plants' + 'PGPR'	Google Scholar	Pseudomonas putida attunes morphophysiological, biochemical and molecular responses in Cicer arietinum L. during drought stress and recovery	Tiwari et al., 2016	Drought is one of the most important abiotic stresses that adversely affect plant growth and yield po- tential. However, some drought resistant rhizosphere competent bacteria are known to improve plant health and promote growth during abiotic stresses. Present study showed the role of Pseudomonas putida MTCC5279 (RA) in ameliorating drought stress on cv. BG-362 (desi) and cv. BG-1003 (kabuli) chi…	Accepted
ACO' + 'gene expression'+ 'drought stress' ' plants' + 'PGPR'	Google Scholar	Southern blight disease of tomato control by 1-aminocyclopropane-1-carboxylate (ACC) deaminase producing Paenibacillus lentimorbus B-30488	Dixit et al., 2015	Tomato cultivation is highly susceptible for soil born diseases and among them southern blight disease caused by Scelerotium rolfsii is very common. For its management use of chemical fungicides is not very successful as their spores are able to survive for many years in the soil. As an alternative eco-friendly approach to control the disease antagonistic microbes are being characterized.Among th…	Rejected	Biotic stress
ACO' + 'gene expression'+ 'drought stress' ' plants' + 'PGPR'	Google Scholar	Bio-prospecting of ACC deaminase producing Rhizobacteria towards sustainable agriculture: A special emphasis on abiotic stress in plants	Murali et al., 2021	In agriculture, eco-friendly management practices worldwide are required to enhance food security under the changing agro-climatic environmental conditions with avoiding the use of harmful chemicals. Plant growth promoting rhizobacteria (PGPR) is a group of soil microbes closely associated with roots and capable of improving plant growth. 1-Aminocyclopropane-1-carboxylic acid (ACC) deaminase prod…	Rejected	Review
ACO' + 'gene expression'+ 'drought stress' ' plants' + 'PGPR'	Google Scholar	Enhancement of growth and salt tolerance of rice seedlings (Oryza sativa L.) by regulating ethylene production with a novel halotolerant PGPR strain Glutamicibacter sp. YD01 containing ACC deaminase activity	Ji et al.,2020	Plant growth-promoting rhizobacteria can stimulate not only plant growth and development, but also alleviate the negative effects on plants caused by abiotic stresses. In this study, a novel halotolerant strain was isolated and identified as Glutamici- bacter sp. (YD01) using 16S rDNA analysis. This strain tolerated up to 10% NaCl and showed two growth-promoting traits such as 1-aminocyclopropane…	Rejected	No drought stress
ACO' + 'gene expression'+ 'drought stress' ' plants' + 'PGPR'	Google Scholar	Plant Growth-Promoting Microbes for Sustainable Biotic and Abiotic Stress Management	Mohamed et al., 2021		Rejected	Book
ACO' + 'gene expression'+ 'drought stress' ' plants' + 'PGPR'	Google Scholar	A multifaceted rhizobacterium Paenibacillus lentimorbus alleviates nutrient deficiency-induced stress in Cicer arietinum L.	Bisht et al., 2019	Nutrient deficiency in soil is one of the limiting factors responsible for stunted growth and poor flowering/ fruiting of crops which result in decline in overall agricultural productivity. However, one important strategy to overcome the problem of nutrient deficiency and to avoid use of chemical fertilizers is the use of plant growth promoting rhizobacteria (PGPR). Paenibacillus lentimorbus NRRL…	Rejected	No abiotic stress
ACO' + 'gene expression'+ 'drought stress' ' plants' + 'PGPR'	Google Scholar	Mechanisms of the IAA and ACC- deaminase producing strain of Trichoderma longibrachiatum T6 in enhancing wheat seedling tolerance to NaCl stress	Zhang et al., 2019	Background: Trichoderma species, a class of plant beneficial fungi, may provide opportunistic symbionts to induce plant tolerance to abiotic stresses. Here, we determined the possible mechanisms responsible for the indole acetic acid (IAA) and 1-aminocyclopropane-1-carboxylate-deaminase (ACC-deaminase) producing strain of Trichoderma longibrachiatum T6 (TL-6) in promoting wheat (Triticum aestivum…	Rejected	Fungi
ACO' + 'gene expression'+ 'drought stress' ' plants' + 'PGPR'	Google Scholar	MODULATION OF BARLEY (Hordeum vulgare) DEFENSE AND HORMONAL PATHWAYS BY PSEUDOMONAS SPECIES ACCOUNTED FOR SALINITY TOLERANCE	Zaib et al., 2021	In the present study, we investigated two Pseudomonas species strains (P. fluorescens SBW25 and P. putida KT2440) for their use in plant tolerance under salt stressed condition. Barley (Hordeum vulgare L.) plants inoculated with PGPR strains were subjected to 200mM salinity stress and were analyzed in comparison to non-treated stressed plants based on height, leaf area and fresh and dry weights o…	Rejected	No drought stress
ACO' + 'gene expression'+ 'drought stress' ' plants' + 'PGPR'	Google Scholar	Ethylene emission and PR protein synthesis in ACC deaminase producing Methylobacterium spp. inoculated tomato plants (Lycopersicon esculentum Mill.) challenged with Ralstonia solanacearum under greenhouse conditions	Yim et al., 2013	Bacteria of genus Methylobacterium have been found to promote plant growth and regulate the level of ethylene in crop plants. This work is aimed to test the induction of defense responses in tomato against bacterial wilt by stress ethylene level reduction mediated by the ACC deaminase activity of Methyl- obacterium strains. Under greenhouse conditions, the disease index value in Methylobacterium …	Rejected	Biotic stress
ACO' + 'gene expression'+ 'drought stress' ' plants' + 'PGPR'	Google Scholar	Effects of plant growth-promoting rhizobacteria strains producing ACC deaminase on photosynthesis, isoprene emission, ethylene formation and growth of Mucuna pruriens (L.) DC. in response to water deficit	Brunetti et al., 2021	Agricultural sustainability is an increasing need considering the challenges posed by climate change and rapid human population growth. The use of plant growth-promoting rhizobacteria (PGPR) may represent an excellent, new agriculture practice to improve soil quality while promoting growth and yield of important crop species subjected to water stress conditions. In this study, two PGPR strains wi…	Accepted
ACO' + 'gene expression'+ 'drought stress' ' plants' + 'PGPR'	Google Scholar	Unravelling the biochemistry and genetics of ACC deaminase-An enzyme alleviating the biotic and abiotic stress in plants	Gupta et al., 2019	The enzyme 1-aminocyclopropane-1-carboxylate (ACC) deaminase is known for alleviating the adverse effects of ethylene generated in response various stressors. Phylogenetic analysis of corresponding gene encoding ACC degrading enzyme (acds) reveals their occurrence in diverse group of bacteria and fungi. The transcription of acds gene is tightly regulated and expresses differentially under differe…	rejected	Review
ACO' + 'gene expression'+ 'drought stress' ' plants' + 'PGPR'	Google Scholar	Microbes in Cahoots with Plants: MIST to Hit the Jackpot of Agricultural Productivity during Drought	Kaushal, 2019	Drought conditions marked by water deficit impede plant growth thus causing recurrent decline in agricultural productivity. Presently, research efforts are focussed towards harnessing the potential of microbes to enhance crop production during drought. Microbial communities, such as arbuscular mycorrhizal fungi (AMF) and plant growth-promoting rhizobacteria (PGPR) buddy up with plants to boost cr…	rejected	Review
ACO' + 'gene expression'+ 'drought stress' ' plants' + 'PGPR'	Google Scholar	Gene expression profiling of tomato roots interacting with Pseudomonas fluorescens unravels the molecular reprogramming that occurs during the early phases of colonization	Scotti et al.,2019	The concerns of people over the wide use of chemicals are determining an increasing attention to more eco-friendly management practices in agriculture. Plant growth promoting rhizobacteria (PGPR) are emerging as important beneficial microbial inoculants because of their capability to promote plant growth and improve plant protection. We performed RNASeq to analyze gene expression profiling at 24,…	Rejected	No abiotic stress
ACO' + 'gene expression'+ 'drought stress' ' plants' + 'PGPR'	Google Scholar	Alleviation of drought stress in pulse crops with ACC deaminase producing rhizobacteria isolated from acidic soil of Northeast India	Saikia et al.,2018	The agricultural crops are often affected by the scarcity of fresh water. Seasonal drought is a major constraint on Northeast Indian agriculture. Almost 80% of the agricultural land in this region is acidic and facing severe drought during the winter period. Apart from classical breeding and transgenic approaches, the application of plant-growth-promoting bacteria (PGPB) is an alternative strateg…	Accepted
ACO' + 'gene expression'+ 'drought stress' ' plants' + 'PGPR'	Google Scholar	Plant Growth-Promoting Rhizobacteria: Context, Mechanisms of Action, and Roadmap to Commercialization of Biostimulants for Sustainable Agriculture.	Backer et al., 2018	Microbes of the phytomicrobiome are associated with every plant tissue and, in combination with the plant form the holobiont. Plants regulate the composition and activity of their associated bacterial community carefully. These microbes provide a wide range of services and benefits to the plant; in return, the plant provides the microbial community with reduced carbon and other metabolites. Soils…	Rejected	Review
ACO' + 'gene expression'+ 'drought stress' ' plants' + 'PGPR'	Google Scholar	Amelioration of Salinity Stress by PGPR: ACC Deaminase and ROS Scavenging Enzymes Activity	Bharti et al., 2016		Rejected	Book chapter
ACO' + 'gene expression'+ 'drought stress' ' plants' + 'PGPR'	Google Scholar	Combating the Abiotic Stress Through Phytomicrobiome Studies	Maheshwari et al., 2021		Rejected	Book chapter
ACO' + 'gene expression'+ 'drought stress' ' plants' + 'PGPR'	Google Scholar	Role of Ethylene Biosynthesis Genes in the Regulation of Salt Stress and Drought Stress Tolerance in Petunia	Naing et al., 2022	Ethylene plays a critical signaling role in the abiotic stress tolerance mechanism. However, the role of ethylene in regulating abiotic stress tolerance in petunia has not been well- investigated, and the underlying molecular mechanism by which ethylene regulates abiotic stress tolerance is still unknown. Therefore, we examined the involvement of ethylene in salt and drought stress tolerance of p…	Rejected	No PGPR
ACO' + 'gene expression'+ 'drought stress' ' plants' + 'PGPR'	Google Scholar	Effect of plant growth-promoting Rhizobacteria on plant hormone homeostasis	Tsukanova et al.,2017	Plant growth-promoting rhizobacteria (PGPR) includes a wide variety of bacterial strains from different taxo- nomic groups that inhabit plant roots and their rhizosphere. By bringing about complex changes in plant growth and development, PGPR can enhance both productivity of agricultural crops, and their pathogen resistance. Colonization by PGPR is associated with changes in plant metabolism, sig…	Rejected	Review
ACO' + 'gene expression'+ 'drought stress' ' plants' + 'PGPR'	Google Scholar	Bio-control agents activate plant immune response and prime susceptible tomato against root-knot nematodes	Molinari et al., 2019	Beneficial microorganisms are generally known to activate plant defense against biotic chal- lenges. However, the molecular mechanisms by which activated plants react more rapidly and actively to pests remain still largely unclear. Tomato plants pre-treated with a mixture of beneficial bio-control agents (BCAs), as soil-drenches, were less sensitive to infection of the root-knot nematode (RKN) Me…	Rejected	Biotic stress
ACO' + 'gene expression'+ 'drought stress' ' plants' + 'PGPR'	Google Scholar	Bacillus amyloliquefaciens MBI600 differentially induces tomato defense signaling pathways depending on plant part and dose of application	Dimopoulou et al., 2019	The success of Bacillus amyloliquefaciens as a biological control agent relies on its ability to outgrow plant pathogens. It is also thought to interact with its plant host by inducing systemic resistance. In this study, the ability of B. amyloliquefaciens MBI600 to elicit defense (or other) responses in tomato seedlings and plants was assessed upon the expression of marker genes and transcriptom…	Rejected	Biotic stress
ACO' + 'gene expression'+ 'drought stress' ' plants' + 'PGPR'	Google Scholar	Water Conservation and Plant Survival Strategies of Rhizobacteria under Drought Stress	Khan et al., 2020	Drylands are stressful environment for plants growth and production. Plant growth-promoting rhizobacteria (PGPR) acts as a rampart against the adverse impacts of drought stress in drylands and enhances plant growth and is helpful in agricultural sustainability. PGPR improves drought tolerance by implicating physio-chemical modifications called rhizobacterial-induced drought endurance and resilien…	Rejected	Review
ACO' + 'gene expression'+ 'drought stress' ' plants' + 'PGPR'	Google Scholar	Transcriptomic profiling of maize (Zea mays L.) seedlings in response to Pseudomonas putida stain FBKV2 inoculation under drought stress	SkZ et al., 2018	Several mechanisms have been proposed for plant growth-promoting rhizobacteria (PGPR)-mediated drought stress tolerance in plants, but little is known about the molecular pathways involved in the drought tolerance promoted by PGPR. We, therefore, aim to study the differential gene response between Pseudomonas putida strain FBKV2 and maize interaction under drought stress using Illumina sequencing…	Accepted
ACO' + 'gene expression'+ 'drought stress' ' plants' + 'PGPR'	Google Scholar	Real time expression of ACC oxidase and PR-protein genes mediated by Methylobacterium spp. in tomato plants challenged with Xanthomonas campestris pv. Vesicatoria	Yim et al., 2014	Biotic stress like pathogenic infection increases ethylene biosynthesis in plants and ethylene inhibitors are known to alleviate the severity of plant disease incidence. This study aimed to reduce the bacte- rial spot disease incidence in tomato plants caused by Xanthomonas campestris pv. vesicatoria (XCV) by modulating stress ethylene with 1-aminocyclopropane-1-carboxylate (ACC) deaminase activi…	Rejected	Biotic stress
ACO' + 'gene expression'+ 'drought stress' ' plants' + 'PGPR'	Google Scholar	Phomopsis liquidambaris reduces ethylene biosynthesis in rice under salt stress via inhibiting the activity of 1‐aminocyclopropane‐1‐carboxylate deaminase	Siddikee et al.,2021	The endophytic fungus Phomopsis liquidambaris is characterized as a plant growth-promoting agent under salt stress, but its mechanism is unknown. Herein, 1-aminocyclopropane-1-carboxylate deaminase (ACCD) from the strain was confirmed that it had the ability of utilizing 1-aminocyclopropane-1-carboxylate as the sole nitrogen source. The full-length ACCD gene was 1152 bp, which encodes a mature pr…	Rejected	Fungi
ACO' + 'gene expression'+ 'drought stress' ' plants' + 'PGPR'	Google Scholar	Transcriptomic and metabolomic analyses reveal that bacteria promote plant defense during infection of soybean cyst nematode in soybean	Kang et al.,2018	Background: Soybean cyst nematode (SCN) is the most devastating pathogen of soybean. Our previous study showed that the plant growth-promoting rhizobacterium Bacillus simplex strain Sneb545 promotes soybean resistance to SCN. Here, we conducted a combined metabolomic and transcriptomic analysis to gain information regarding the biological mechanism of defence enhancement against SCN in Sneb545-tr…	Rejected	Biotic stress
ACO' + 'gene expression'+ 'drought stress' ' plants' + 'PGPR'	Google Scholar	Expression of an exogenous 1-aminocyclopropane-1-carboxylate deaminase gene in psychrotolerant bacteria modulates ethylene metabolism and cold induced genes in tomato under chilling stress	Subramanian et al., 2015	The role of stress induced ethylene under low temperature stress has been controversial and hitherto remains unclear. In the present study, 1-aminocyclopropane-1-carboxylate deaminase (ACCD) gene, acdS expressing mutant strains were generated from ACCD negative psychrotolerant bacterial strains Fla- vobacterium sp. OR306 and Pseudomonas frederiksbergensis OS211, isolated from agricultural soil du…	Rejected	No drought stress
ACO' + 'gene expression'+ 'drought stress' ' plants' + 'PGPR'	Google Scholar	The biocontrol endophytic bacterium Pseudomonas fluorescens PICF7 induces systemic defense responses in aerial tissues upon colonization of olive roots	Gómez-Lama Cabanás et al., 2014	Pseudomonas fluorescens PICF7, a native olive root endophyte and effective biocontrol agent (BCA) against Verticillium wilt of olive, is able to trigger a broad range of defense responses in root tissues of this woody plant. In order to elucidate whether strain PICF7 also induces systemic defense responses in above-ground organs, aerial tissues of olive plants grown under non-gnotobiotic conditio…	Rejected	Biotic stress
ACO' + 'gene expression'+ 'drought stress' ' plants' + 'PGPR'	Google Scholar	Drought-Tolerant Plant Growth-Promoting Rhizobacteria Associated with Foxtail Millet in a Semi-arid Agroecosystem and Their Potential in Alleviating Drought Stress.	Niu et al., 2018	The application of plant growth promoting rhizobacteria (PGPR) to agro-ecosystems is considered to have the potential for improving plant growth in extreme environments featured by water shortage. Herein, we isolated bacterial strains from foxtail millet (Setaria italica L.), a drought-tolerant crop cultivated in semiarid regions in the northeast of China. Four isolates were initially selected fo…	Rejected	No ACO expression
ACO' + 'gene expression'+ 'drought stress' ' plants' + 'PGPR'	Google Scholar	ACC deaminase containing endophytic bacteria ameliorate salt stress in Pisum sativum through reduced oxidative damage and induction of antioxidative defense systems	Sofy et al., 2021	Approximately 6% of the world’s total land area and 20% of the irrigated land are affected by salt stress. Egypt is one such country affected by salt-stress problems. This paper focuses on the role of isolated bacteria, such as Bacillus subtilis and Pseudomonas fluorescens, in alleviating the harmful effects of salt stress. The results show that the irrigation of plants with different concentrati…	Rejected	No ACO expression
ACO' + 'gene expression'+ 'drought stress' ' plants' + 'PGPR'	Google Scholar	Regulation of Ethylene Biosynthesis Under Salt Stress in Red Pepper (Capsicum annuum L.) by 1-Aminocyclopropane-1- Carboxylic Acid (ACC) Deaminase-producing Halotolerant Bacteria	Siddikee et al.,2012	The present study was carried out to understand the mechanism of salt stress amelioration in red pepper plants by inoculation of 1-aminocyclopropane-1-carboxylic acid (ACC) deaminase-producing halotolerant bacteria. In general, ethylene production, ACC concentration, ACC synthase (ACS), and ACC oxidase (ACO) enzyme activities increased with increasing levels of salt stress. Treat- ment with halot…	Rejected	No ACO expression
ACO' + 'gene expression'+ 'drought stress' ' plants' + 'PGPR'	Google Scholar	The intricacy of silicon, plant growth regulators and other signaling molecules for abiotic stress tolerance: An entrancing crosstalk between stress alleviators	Khan et al., 2021	Unfavorable environmental conditions are the critical inimical to the sustainable agriculture. Among various novel strategies designed to protect plants from abiotic stress threats, use of mineral elements as ‘stress miti- gators’ has emerged as the most crucial and interesting aspect. Silicon (Si) is a quasi-essential nutrient that mediates plant growth and development and interacts with plant g…	Rejected	Review
ACO' + 'gene expression'+ 'drought stress' ' plants' + 'PGPR'	Google Scholar	ACC deaminase‐producing rhizosphere competent Bacillus spp. mitigate salt stress and promote Zea mays growth by modulating ethylene metabolism	Misra-Chauhan, 2020	Plant growth-promoting rhizobacteria (PGPR) are known for growth promotion and mitigating environmental stresses. Here, we examined the propitiousness of three indigenous salt-tolerant PGPR, i.e., Bacillus subtilis (NBRI 28B), B. subtilis (NBRI 33 N), and B. safensis (NBRI 12 M) for plant growth promotion and salt stress amelioration in Zea mays. Results of the in vitro plant growth-promoting att…	Rejected	Proteomic study
ACO' + 'gene expression'+ 'drought stress' ' plants' + 'PGPR'	Google Scholar	Rhizobacteriome: Promising Candidate for Conferring Drought Tolerance in Crops	Yadav et al., 2020	Drought is a global water shortage problem which poses challenge to crop productivity. Novel strategies are being tried to find out solution to sustain agriculture under drought conditions. Rhizobacteriome is an exclusive genetic material of bacteria resident to rhizosphere plays critical role to health and yield of plant. The interaction of rhizobacteriome with plant provides basis for protectin…	Rejected	Review
ACO' + 'gene expression'+ 'drought stress' ' plants' + 'PGPR'	Google Scholar	Exogenous Spermidine Inhibits Ethylene Production in Leaves of Cucumber Seedlings under NaCl Stress	Li et al., 2013	To examine whether 1 mM of spermidine (Spd) modifies plant ethylene production in response to short- term salt stress, cucumber (Cucumis sativus) seedlings were grown in nutrient solution with or without 75 mM NaCl stress for 3 days, and the leaves were sprayed with 1 mM Spd or water (control). We investigate the effects of the treatments on ethylene production, 1-aminocyclopropane-1-carboxylate …	Rejected	No drought stress
ACO' + 'gene expression'+ 'drought stress' ' plants' + 'PGPR'	Google Scholar	Drought Tolerance Strategies in Plants: A Mechanistic Approach	Ilyas et al., 2021	Anthropogenic activities in the past and present eras have created global warming and consequently a storm of drought stress, affecting both plants and animals. Being sessile, plants are more vulnerable to drought stress and consequently reduce plant growth and yield. To mitigate the effects of drought stress on plants, it is very crucial to determine the plant response mechanisms against drought…	rejected	Review
ACO' + 'gene expression'+ 'drought stress' ' plants' + 'PGPR'	Google Scholar	Phomopsis Liquidambaris Contributes to the Decease of Ethylene Biosynthesis in Rice under Salt Stress via Inhibiting the Activity of 1- Aminocyclopropane-1-Carboxylate Deaminase	Siddikee et al.,2021		Rejected	Duplicato
ACO' + 'gene expression'+ 'drought stress' ' plants' + 'PGPR'	Google Scholar	Properties of bacterial endophytes and their proposed role in plant growth	Hardoim et al., 2008	Bacterial endophytes live inside plants for at least part of their life cycle. Studies of the interaction of endophytes with their host plants and their function within their hosts are important to address the ecological relevance of endophytes. The modulation of ethylene levels in plants by bacterially produced 1-aminocyclopropane-1- carboxylate deaminase is a key trait that enables interference…	Rejected	Review
ACO' + 'gene expression'+ 'drought stress' ' plants' + 'PGPR'	Google Scholar	Trichoderma atroviride LU132 promotes plant growth but not induced systemic resistance to Plutella xylostella in oilseed rape	Maag et al., 2014	Several species of the fungus Trichoderma can promote plant health and are widely used as commercial biopesticides. Beneficial effects of this fungus are attributed to various mechanisms such as mycoparasitism, plant-growth promotion, increased stress tolerance and elicitation of induced systemic resistance against pathogens via jasmonic acid/ethyl- ene-dependent pathways. Despite such well-estab…	Rejected	Fungi
ACO' + 'gene expression'+ 'drought stress' ' plants' + 'PGPR'	Google Scholar	Comparative Physiological, Biochemical, and Genetic Responses to Prolonged Waterlogging Stress in Okra and Maize Given Exogenous Ethylene Priming	Vwioko et al., 2017	Waterlogging is an environmental challenge affecting crops worldwide. Ethylene induces the expression of genes linked to important agronomic traits under waterlogged conditions. The ability of okra (Abelmoschus esculentus L. Moench.) and maize (Zea mays L.) given exogenous ethylene priming to tolerate prolonged waterlogged conditions was investigated in this study. The investigation was carried o…	rejected	No PGPR
ACO' + 'gene expression'+ 'drought stress' ' plants' + 'PGPR'	Google Scholar	Biological Control Activity of Plant Growth Promoting Rhizobacteria Burkholderia contaminans AY001 against Tomato Fusarium Wilt and Bacterial Speck Diseases	Heo et al., 2022	Plant growth promoting rhizobacteria (PGPR) is not only enhancing plant growth, but also inducing resistance against a broad range of pathogens, thus providing effective strategies to substitute chemical products. In this study, Burkholderia contaminans AY001 (AY001) is isolated based on its broad-spectrum antifungal activity. AY001 not only inhibited fungal pathogen growth in dual culture and cu…	Rejected	Biotic stress
ACO' + 'gene expression'+ 'drought stress' ' plants' + 'PGPR'	Google Scholar	Molecular signaling involved in immune system activation against root-knot nematodes by biocontrol agents in tomato plants	Molinari et al., 2019	The expression of key defense genes was detected in roots and leaves of tomato plants until the 12th day after treatments with a mixture of beneficial bio-control agents (BCAs), as soil-drenches. The expression of the same genes was monitored in pre- treated plants at the 3rd and 7th day since the inoculation with the root-knot nematode Meloidogyne incognita. Genes dependent on SA-signaling, such…	Rejected	Biotic stress
ACO' + 'gene expression'+ 'drought stress' ' plants' + 'PGPR'	Google Scholar	Ethylene as a modulator of disease resistance in plants	van Loon et al., 2006	The role of ethylene in the hormonal regulation of plant development has been well established. In addition, it has been implicated in biotic stress, both as a virulence factor of fungal and bacterial pathogens and as a signaling compound in disease resistance. This apparent discrepancy has stimulated research on the effects of various types of pathogens on mutant and transgenic plants that are i…	Rejected	Review
ACO' + 'gene expression'+ 'drought stress' ' plants' + 'PGPR'	Google Scholar	Accumulation and Transport of 1-Aminocyclopropane-1-Carboxylic Acid (ACC) in Plants: Current Status, Considerations for Future Research and Agronomic Applications	Vanderstraeten et al., 2017	1-aminocyclopropane-1-carboxylic acid (ACC) is a non-protein amino acid acting as the direct precursor of ethylene, a plant hormone regulating a wide variety of vegetative and developmental processes. ACC is the central molecule of ethylene biosynthesis. The rate of ACC formation differs in response to developmental, hormonal and environmental cues. ACC can be conjugated to three derivatives, met…	Rejected	Review
ACO' + 'gene expression'+ 'drought stress' ' plants' + 'PGPR'	Google Scholar	Identification of Endophytic Bacteria and their Characterization as Biocontrol Agents against Tomato Southern Blight Disease	Ribaudo et al., 2016	Objectives: The purpose of the present study was to characterize the endophytic bacterium PAC BNM0522 and to evaluate its role in the ethylene signaling pathway in the development of southern blight disease (caused by the necrotrophic fungus Sclerotium rolfsii) in tomato plants. Methods: In this study, biochemical tests, 16S rRNA gene sequencing, and amplification of the ACCD gene (acdS) were per…	Rejected	Biotic stress
ACO' + 'gene expression'+ 'drought stress' ' plants' + 'PGPR'	Google Scholar	Silicon-mediated abiotic and biotic stress mitigation in plants: Underlying mechanisms and potential for stress resilient agriculture	Ranjan et al., 2021	Silicon (Si) is a beneficial macronutrient for plants. The Si supplementation to growth media mitigates abiotic and biotic stresses by regulating several physiological, biochemical and molecular mechanisms. The uptake of Si from the soil by root cells and subsequent transport are facilitated by Lsi1 (Low silicon1) belonging to nodulin 26-like major intrinsic protein (NIP) subfamily of aquaporin p…	Rejected	Review
ACO' + 'gene expression'+ 'drought stress' ' plants' + 'PGPR'	Google Scholar	Priming of Induced Plant Defense Responses	Conrath et al., 2009		Rejected	Book chapter
ACO' + 'gene expression'+ 'drought stress' ' plants' + 'PGPR'	Google Scholar	A Complex Molecular Interplay of Auxin and Ethylene Signaling Pathways Is Involved in Arabidopsis Growth Promotion by Burkholderia phytofirmans PsJN	Poupin et al., 2016	Modulation of phytohormones homeostasis is one of the proposed mechanisms to explain plant growth promotion induced by beneficial rhizobacteria (PGPR). However, there is still limited knowledge about the molecular signals and pathways underlying these beneficial interactions. Even less is known concerning the interplay between phytohormones in plants inoculated with PGPR. Auxin and ethylene are c…	Rejected	No abiotic stress
ACO' + 'gene expression'+ 'drought stress' ' plants' + 'PGPR'	Google Scholar	Response to Fusarium oxysporum f.sp. radicis-lycopersici in tomato roots involves regulation of SA- and ET-responsive gene expressions	Çakır et al.,2014	Fusarium crown and root rot of tomato (Lycopersicon esculentum) caused by Fusarium oxysporum f.sp. radicis-lycopersici (FORL) is a damag- ing disease of greenhouse crops worldwide. Here, we characterize in vivo, a new strain of FORL (27.2) isolated from wilting, sensitive tomato cultivar Kardelen F1, widely grown in Turkey. Compared to a reference strain (usaFORL), 27.2 strain was less virulent i…	Rejected	Biotic stress
ACO' + 'gene expression'+ 'drought stress' ' plants' + 'PGPR'	Google Scholar	Microbial enzyme, 1-aminocyclopropane-1-carboxylic acid (ACC) deaminase: An elixir for plant under stress	Jha et al., 2021	Ethylene, being deleterious to plant in some instances like stress, is essential for ripening of fruits, overcoming seed dormancy and initiation of germination, however, ethylene can inhibit root elongation post germination. For plants, 1-aminocyclopropane-1-carboxylic acid (ACC) serves as precursor of ethylene however, for microbes ACC acts as chemoattractant. This establishes a scenario in the …	Rejected	Review
ACO' + 'gene expression'+ 'drought stress' ' plants' + 'PGPR'	Google Scholar	Advances in Plant Microbiome and Sustainable Agriculture	Chandra et al.,2020		Rejected	Book
ACO' + 'gene expression'+ 'drought stress' ' plants' + 'PGPR'	Google Scholar	Plant, Soil and Microbes in Tropical Ecosystems	Dubey et al., 2021		Rejected	Book
ACO' + 'gene expression'+ 'drought stress' ' plants' + 'PGPR'	Google Scholar	Plant Biotic Interactions	Varma et al., 2019		Rejected	Book
ACO' + 'gene expression'+ 'drought stress' ' plants' + 'PGPR'	Google Scholar	Recent advances in physiological and molecular mechanisms of heavy metal accumulation in plants	Feki et al., 2021	Among abiotic stress, the toxicity of metals impacts negatively on plants’ growth and productivity. This toxicity promotes various perturbations in plants at different levels. To withstand stress, plants involve efficient mechanisms through the impli- cation of various signaling pathways. These pathways enhance the expression of many target genes among them gene coding for metal transporters. Var…	Rejected	Review
ACO' + 'gene expression'+ 'drought stress' ' plants' + 'PGPR'	Google Scholar	Spatio-temporal dynamics in global rice gene expression (Oryza sativa L.) in response to high ammonium stress	Sun et al., 2017	Ammonium (NH4 + ) is the predominant nitrogen (N) source in many natural and agricultural ecosystems, including flooded rice fields. While rice is known as an NH4 + -tolerant species, it nevertheless suffers NH4 + toxicity at elevated soil concentrations. NH4 + excess rapidly leads to the disturbance of various physiolog- ical processes that ultimately inhibit shoot and root growth. However, the …	Rejected	No PGPR
ACO' + 'gene expression'+ 'drought stress' ' plants' + 'PGPR'	Google Scholar	Grapevine rootstock and soil microbiome interactions: Keys for a resilient viticulture	Darriaut et al., 2022	Soil microbiota has increasingly been shown to play an integral role in viticulture resilience. The emergence of new metagenomic and culturomic technologies has led to significant advances in the study of microbial biodiversity. In the agricultural sector, soil and plant microbiomes have been found to significantly improve resistance to environmental stressors and diseases, as well as influencing…	Rejected	Review
ACO' + 'gene expression'+ 'drought stress' ' plants' + 'PGPR'	Google Scholar	Helping plants to deal with heavy metal stress: the role of nanotechnology and plant growth promoting rhizobacteria in the process of phytoremediation	Gulzar-Mazumder, 2022	Heavy metals (HMs) are not destroyable or degradable and persist in the environment for a long duration. Thus, eliminating and counteracting the HMs pollution of the soil environment is an urgent task to develop a safe and sustainable environ- ment. Plants are in close contact with the soil and can play an important role in soil clean-up, and the process is known as phytoremediation. However, und…	Rejected	Review
ACO' + 'gene expression'+ 'drought stress' ' plants' + 'PGPR'	Google Scholar	Biocontrol activity of anti-salinity Bacillus mesonae H20-5 against Bacterial wilt in different tomato cultivars	Yoo et al., 2022	Bacterial wilt caused by Ralstonia solanacearum and soil salinity are critical problems associated with the cultivation of tomato plants in Korea. In our previous study, we demonstrated the alleviation of salinity stress by Bacillus mesonae H20-5 in tomato plants. In this study, we investigated the effects of strain H20-5 on disease suppression and salinity stress in two different cultivars, whic…	Rejected	BIotic stress
ACO' + 'gene expression'+ 'drought stress' ' plants' + 'PGPR'	Google Scholar	Role of Silicon in Mediating Salt Tolerance in Plants: A Review	Zhu et al., 2019	Salt stress is a major threat for plant growth worldwide. The regulatory mechanisms of silicon in alleviating salt stress have been widely studied using physiological, molecular genetics, and genomic approaches. Recently, progresses have been made in elucidating the alleviative effects of silicon in salt-induced osmotic stress, Na toxicity, and oxidative stress. In this review, we highlight recen…	Rejected	Review
ACO' + 'gene expression'+ 'drought stress' ' plants' + 'PGPR'	Google Scholar	Alginate-Induced Disease Resistance in Plants	Riseh et al., 2022	Plants are continuously exposed to a wide range of pathogens, including fungi, bacteria, nematodes, and viruses; therefore, survival under these conditions requires a sophisticated defense system. The activation of defense responses and related signals in plants is regulated mainly by the hormones salicylic acid, jasmonic acid, and ethylene. Resistance to pathogen infection can be induced in plan…	Rejected	Review
ACO' + 'gene expression'+ 'drought stress' ' plants' + 'PGPR'	Google Scholar	Molecular Mechanisms of the 1-Aminocyclopropane-1-Carboxylic Acid (ACC) Deaminase Producing Trichoderma asperellum MAP1 in Enhancing Wheat Tolerance to Waterlogging Stress	Rauf et al., 2021	Waterlogging stress (WS) induces ethylene (ET) and polyamine (spermine, putrescine, and spermidine) production in plants, but their reprogramming is a decisive element for determining the fate of the plant upon waterlogging-induced stress. WS can be challenged by exploring symbiotic microbes that improve the plant’s ability to grow better and resist WS. The present study deals with identification…	Rejected	Fungi
ACO' + 'gene expression'+ 'drought stress' ' plants' + 'PGPR'	Google Scholar	Plant Drought Tolerance Enhancement by Trehalose Production of Desiccation-Tolerant Microorganisms	Vílchez et al., 2016	A collection of desiccation-tolerant xeroprotectant-producing microorganisms was screened for their ability to protect plants against drought, and their role as plant growth- promoting rhizobacteria was investigated in two different crops (tomato and pepper). The most commonly described biochemical mechanisms for plant protection against drought by microorganisms including the production of phyto…	Accepted
ACO' + 'gene expression'+ 'drought stress' ' plants' + 'PGPR'	Google Scholar	Transcriptomics of Biostimulation of Plants Under Abiotic Stress	González-Morales et al., 2021	Plant biostimulants are compounds, living microorganisms, or their constituent parts that alter plant development programs. The impact of biostimulants is manifested in several ways: via morphological, physiological, biochemical, epigenomic, proteomic, and transcriptomic changes. For each of these, a response and alteration occur, and these alterations in turn improve metabolic and adaptive perfo…	Rejected	Review
ACO' + 'gene expression'+ 'drought stress' ' plants' + 'PGPR'	Google Scholar	Amelioration of drought effects in wheat and cucumber by the combined application of super absorbent polymer and potential biofertilizer	Li et al., 2018	Biofertilizer is a good substitute for chemical fertilizer in sustainable agriculture, but its effects are often hindered by drought stress. Super absorbent polymer (SAP), showing good capacity of water absorption and retention, can increase soil moisture. However, limited information is available about the efficiency of biofertilizer amended with SAP. This study was conducted to investigate the …	Accepted
ACO' + 'gene expression'+ 'drought stress' ' plants' + 'PGPR'	Google Scholar	Effects of rhizobacterial ACC deaminase activity on Arabidopsis indicate that ethylene mediates local root responses to plant growth-promoting rhizobacteria	Contesto et al., 2018	1-Amino cyclopropane-1-carboxylic acid deaminase (AcdS) is an enzyme that degrades the precursor of plant hormone ethylene. AcdS activity has been identified in many soil bacteria. It has been proposed to play an important role in plant-growth promotion by rhizobacteria. It would lower ethylene level via uncharacterized signaling pathways in the host plant. To further investigate the role of AcdS…	Rejected	no ACO expression
ACO' + 'gene expression'+ 'drought stress' ' plants' + 'PGPR'	Google Scholar	The Evolution of Ethylene Signaling in Plant Chemical Ecology	Groen-Whiteman, 2014	Ethylene is a key hormone in plant development, mediating plant responses to abiotic environmental stress, and interactions with attackers and mutualists. Here, we provide a synthesis of the role of ethylene in the context of plant ecology and evolution, and a prospectus for future research in this area. We focus on the regulatory function of ethylene in multi- organismal interactions. In general…	Rejected	Review
ACO' + 'gene expression'+ 'drought stress' ' plants' + 'PGPR'	Google Scholar	Coordinated bacterial and plant sulfur metabolism in Enterobacter sp. SA187–induced plant salt stress tolerance	Andrés-Barrao et al., 2021	Enterobacter sp. SA187 is a root endophytic bacterium that main- tains growth and yield of plants under abiotic stress conditions. In this work, we compared the metabolic wirings of Arabidopsis and SA187 in the free-living and endophytic interaction states. The interaction of SA187 with Arabidopsis induced massive changes in bacterial gene expression for chemotaxis, flagellar biosynthesis, quorum…	Accepted
ACO' + 'gene expression'+ 'drought stress' ' plants' + 'PGPR'	Google Scholar	Overexpression of 1-Aminocyclopropane-1-Carboxylic Acid Deaminase (acdS) Gene in Petunia hybrida Improves Tolerance to Abiotic Stresses	Naing et al., 2021	Abiotic stress induces the ethylene precursor 1-aminocyclopropane-1-carboxylic acid (ACC) in plants, which consequently enhances ethylene production and inhibits plant growth. The bacterial ACC deaminase enzyme encoded by the acdS gene reduces stress-induced ethylene production and improves plant growth in response to stress. In this study, overexpression of acdS in Petunia hybrida (‘Mirage Rose’…	Rejected	No PGPR
ACO' + 'gene expression'+ 'drought stress' ' plants' + 'PGPR'	Google Scholar	Molecular insights into biochar‐mediated plant growth promotion and systemic resistance in tomato against fusarium crown and root rot disease	Jaiswal et al.,2020	Molecular mechanisms associated with biochar‐elicited suppression of soilborne plant diseases and improved plant performance are not well understood. A stem base inoculation approach was used to explore the ability of biochar to induce systemic resistance in tomato plants against crown rot caused by a soilborne pathogen, Fusarium oxysporum f. sp. radicis lycopersici. RnA‐seq transcriptome profili…	Rejected	Biotic stress
ACO' + 'gene expression'+ 'drought stress' ' plants' + 'PGPR'	Google Scholar	Germin and Germin-like Proteins: Evolution, Structure, and Function	Dunwell et al., 2008	Germin and germin-like proteins (GLPs) are encoded by a fam- ily of genes found in all plants. They are part of the cupin super- family of biochemically diverse proteins, a superfamily that has a conserved tertiary structure, though with limited similarity in primary sequence. The subgroups of GLPs have different enzyme functions that include the two hydrogen peroxide–generating en- zymes, oxalat…	Rejected	Review
ACO' + 'gene expression'+ 'drought stress' ' plants' + 'PGPR'	Google Scholar	Ambiguities of PGPR-Induced Plant Signaling and Stress Management	Jalmi et al., 2022	The growth and stress responses developed by the plant in virtue of the action of PGPR are dictated by the changes in hormone levels and related signaling pathways. Each plant possesses its specific type of microbiota that is shaped by the composition of root exudates and the signal molecules produced by the plant and microbes. Plants convey signals through diverse and complex signaling pathways.…	Rejected	Review
ACO' + 'gene expression'+ 'drought stress' ' plants' + 'PGPR'	Google Scholar	Plant Growth Promotion Under Water: Decrease of Waterlogging-Induced ACC and Ethylene Levels by ACC Deaminase-Producing Bacteria	Ali et al., 2018	Some plant growth-promoting bacteria encode for 1-aminocyclopropane-1-carboxylate (ACC) deaminase, which facilitates plant growth and development by lowering the level of stress ethylene under waterlogged conditions. The substrate ACC is the immediate precursor for ethylene synthesis in plants; while bacterial ACC deaminase hydrolyzes this compound into α-ketobutyrate and ammonia to mitigate the …	Rejected	Review
ACO' + 'gene expression'+ 'drought stress' ' plants' + 'PGPR'	Google Scholar	An Overview of the Genetics of Plant Response to Salt Stress: Present Status and the Way Forward	Kaleem et al., 2018	Salinity is one of the major threats faced by the modern agriculture today. It causes multidimensional effects on plants. These effects depend upon the plant growth stage, intensity, and duration of the stress. All these lead to stunted growth and reduced yield, ultimately inducing economic loss to the farming community in particular and to the country in general. The soil conditions of agricultu…	Rejected	Review
ACO' + 'gene expression'+ 'drought stress' ' plants' + 'PGPR'	Google Scholar	Rhizoremediation of petroleum hydrocarbons: a model system for plant microbiome manipulation	Correa-Garc_x0019_ıa et al.,2018	Phytoremediation is a green and sustainable alterna- tive to physico-chemical methods for contaminated soil remediation. One of the flavours of phytoremedi- ation is rhizoremediation, where plant roots stimulate soil microbes to degrade organic contaminants. This approach is particularly interesting as it takes advan- tage of naturally evolved interaction mechanisms between plant and microorganis…	Rejected	Review
ACO' + 'gene expression'+ 'drought stress' ' plants' + 'PGPR'	Google Scholar	Effects of Bacterial ACC Deaminase on Brassica napus Gene Expression	Stearns et al., 2012	Plants in association with plant growth-promoting rhizo- bacteria can benefit from lower plant ethylene levels through the action of the bacterial enzyme 1-aminocyclopropane-1- carboxylic acid (ACC) deaminase. This enzyme cleaves the immediate biosynthetic precursor of ethylene, ACC. Ethyl- ene is responsible for many aspects of plant growth and development but, under stressful conditions, it exa…	Rejected	No PGPR
ACO' + 'gene expression'+ 'drought stress' ' plants' + 'PGPR'	Google Scholar	1-Aminocycloprpane-1Carboxylate: A Novel and Strong Chemoattractant for the Plant Beficial Rhizobacterium Pseudomonas putida UW4	Zhang et al., 2019		Rejected	No abiotic stress
ACO' + 'gene expression'+ 'drought stress' ' plants' + 'PGPR'	Google Scholar	An Overview of the Genetics of Plant Response to Salt Stress: Present Status and the Way Forward	Kaleem et al.,2018		Rejected	Duplicate
ACO' + 'gene expression'+ 'drought stress' ' plants' + 'PGPR'	Google Scholar	Bioformulation of biochar as a potential inoculant carrier for sustainable agriculture	Ajeng et al., 2020	The dependence on chemical fertilizers and pesticides to increase agricultural outputs owing to the demands of a growing human population creates the need for a sustainable fertilizer. Biochar is presently a promising candidate as an inoculant carrier, given its highly porous structure, with nutrients naturally derived from the biomass, high water, and nutrient retention properties, which favor m…	Rejected	Review
ACO' + 'gene expression'+ 'drought stress' ' plants' + 'PGPR'	Google Scholar	Plants Saline Environment in Perception with Rhizosphere Bacteria Containing 1-Aminocyclopropane-1-Carboxylate Deaminase	Bomle et al., 2021	Soil salinity stress has become a serious roadblock for food production worldwide since it is one of the key factors affecting agricultural productivity. Salinity and drought are predicted to cause considerable loss of crops. To deal with this difficult situation, a variety of strategies have been developed, including plant breeding, plant genetic engineering, and a wide range of agricultural pra…	Rejected	Review
ACO' + 'gene expression'+ 'drought stress' ' plants' + 'PGPR'	Google Scholar	Physiological and Proteomic Responses of Mulberry Trees (Morus alba. L.) to Combined Salt and Drought Stress	Liu et al., 2019	Intensive investigations have been conducted on the effect of sole drought or salinity stress on the growth of plants. However, there is relatively little knowledge on how plants, particularly woody species, respond to a combination of these two stresses although these stresses can simultaneously occur in the field. In this study, mulberry, an economically important resource for traditional medic…	Rejected	Proteomic study
ACO' + 'gene expression'+ 'drought stress' ' plants' + 'PGPR'	Google Scholar	Proteomic Analysis Reveals the Positive Roles of the Plant-Growth-Promoting Rhizobacterium NSY50 in the Response of Cucumber Roots to Fusarium oxysporum f. sp. cucumerinum Inoculation	Du et al., 2016	Plant-growth-promoting rhizobacteria (PGPR) can both improve plant growth and enhance plant resistance against a variety of environmental stresses. To investigate the mechanisms that PGPR use to protect plants under pathogenic attack, transmission electron microscopy analysis and a proteomic approach were designed to test the effects of the new potential PGPR strain Paenibacillus polymyxa NSY50 o…	Rejected	Proteomic study
ACO' + 'gene expression'+ 'drought stress' ' plants' + 'PGPR'	Google Scholar	Current Advances in Plant Growth Promoting Bacteria Alleviating Salt Stress for Sustainable Agriculture	Mokrani et al., 2020	Humanity in the modern world is confronted with diverse problems at several levels. The environmental concern is probably the most important as it threatens different ecosystems, food, and farming as well as humans, animals, and plants. More specifically, salinization of agricultural soils is a global concern because of on one side, the permanent increase of the areas affected, and on the other s…	Rejected	Review
ACO' + 'gene expression'+ 'drought stress' ' plants' + 'PGPR'	Google Scholar	Sphingomonads in Microbe-Assisted Phytoremediation: Tackling Soil Pollution	Waigi et al., 2017	Soil pollution has become a major concern in various terrestrial ecosystems worldwide. One in situ soil bioremediation strategy that has gained popularity recently is microbe-assisted phytoremediation, which is promising for reme- diating pollutants. Sphingomonads, a versatile bacteria group comprising four well-known genera, are ubiquitous in vegetation grown in contaminated soils. These Gram-ne…	Rejected	Review
ACO' + 'gene expression'+ 'drought stress' ' plants' + 'PGPR'	Google Scholar	The Applications of Molecular Hydrogen in Horticulture	Li et al., 2021	Improvements in the growth, yield, and quality of horticultural crops require the develop- ment of simply integrated, cost-efficient, and eco-friendly solutions. Hydrogen gas (H2) has been observed to have fertilization effects on soils by influencing rhizospheric microorganisms, resulting in improvements in crop yield and quality. Ample studies have shown that H2 has positive effects on horticul…	Rejected	Review
ACO' + 'gene expression'+ 'drought stress' ' plants' + 'PGPR'	Google Scholar	Microbiome for sustainable agriculture: a review with special reference to the corn production system	Jat et al., 2021	Microbial diversity formed by ages of evolution in soils plays an important role in sustainability of crop production by enrich- ing soil and alleviating biotic and abiotic stresses. This diversity is as an essential part of the agro-ecosystems, which is being pushed to edges by pumping agrochemicals and constant soil disturbances. Consequently, efficiency of cropping system has been decreasing, …	Rejected	Review
ACO' + 'gene expression'+ 'drought stress' ' plants' + 'PGPR'	Google Scholar	Microbial inoculum development for ameliorating crop drought stress: A case study of Variovorax paradoxus 5C-2	Teijeiro et al., 2020	Drought affects plant hormonal homeostasis, including root to shoot signalling. The plant is intimately con- nected below-ground with soil-dwelling microbes, including plant growth promoting rhizobacteria (PGPR) that can modulate plant hormonal homeostasis. Incorporating PGPR into the rhizosphere often delivers favourable results in greenhouse experiments, while field applications are much less p…	Rejected	Review
ACO' + 'gene expression'+ 'drought stress' ' plants' + 'PGPR'	Google Scholar	Hydrogen sulfide in horticulture: Emerging roles in the era of climate change	Zulfiqar et al., 2020	Future climate change will present many plants with environmental challenges, including extreme temperatures and drought. Hydrogen sulfide (H2S) has emerged as an important signal transmitting molecule in plants, especially important in many stress responses and it is known to regulate numerous physiological and devel- opmental processes. Being recently suggested as a signaling molecule, research…	Rejected	Review
ACO' + 'gene expression'+ 'drought stress' ' plants' + 'PGPR'	Google Scholar	Induced Systemic Resistance (ISR) and Fe Deficiency Responses in Dicot Plants	Romera et al., 2019	Plants develop responses to abiotic stresses, like Fe deficiency. Similarly, plants also develop responses to cope with biotic stresses provoked by biological agents, like pathogens and insects. Some of these responses are limited to the infested damaged organ, but other responses systemically spread far from the infested organ and affect the whole plant. These latter responses include the System…	Rejected	Review
ACO' + 'gene expression'+ 'drought stress' ' plants' + 'PGPR'	Google Scholar	Rhizospheric volatilome in modulating induced systemic resistance against biotic stress: A new paradigm for future food security	Thankappan et al., 2022	Rhizospheric microbiome and their metabolites, interact with plants and contribute to plant health through hormonal modulation, the supply of mineral nutrition, and pathogen suppression. The rhizospheric chemical dialogues between the plants and rhizobiome mediated by microbial volatile organic compounds (MVOCs) act as a mediator of intra-and inter-species communication and plant defense, and the…	Rejected	Review
ACO' + 'gene expression'+ 'drought stress' ' plants' + 'PGPR'	Google Scholar	What is known about phytohormones in halophytes? A review	Llanes et al., 2018	Phytohormones participate in many aspects of the plant life cycle, including responses to biotic and abiotic stresses. They play a key role in plant responses to the environment with direct bearing on a plant’s fitness for adaptation and reproduction. In recent years, there have been major advances in our understanding of the role of phytohormones in halophytic plants. The variability in maximal …	Rejected	Review
ACO' + 'gene expression'+ 'drought stress' ' plants' + 'PGPR'	Google Scholar	Microbial ACC-Deaminase: Prospects and Applications for Inducing Salt Tolerance in Plants	Nadeem et al., 2010	Salinity is one of the most important stresses that hamper agri- cultural productivity in nearly every part of the world. Enhanced biosynthesis of ethylene in plants under salinity stress is well es- tablished. Higher ethylene concentration inhibits root growth and ultimately affects the overall plant growth. Overcoming this ethylene-induced root inhibition is a prerequisite for successful crop p…	Rejected	Review
ACO' + 'gene expression'+ 'drought stress' ' plants' + 'PGPR'	Google Scholar	Ethylene: A Master Regulator of Salinity Stress Tolerance in Plants	Riyazuddin et al., 2020	Salinity stress is one of the major threats to agricultural productivity across the globe. Research in the past three decades, therefore, has focused on analyzing the effects of salinity stress on the plants. Evidence gathered over the years supports the role of ethylene as a key regulator of salinity stress tolerance in plants. This gaseous plant hormone regulates many vital cellular processes s…	Rejected	Review
ACO' + 'gene expression'+ 'drought stress' ' plants' + 'PGPR'	Google Scholar	The Role of Ethylene in Plants Under Salinity Stress	Tao et al., 2015	Although the roles of ethylene in plant response to salinity and other stresses have been extensively studied, there are still some obscure points left to be clarified. Generally, in Arabidopsis and many other terrestrial plants, ethylene signaling is indispensable for plant rapid response and tolerance to salinity stress. However, a few studies showed that functional knock-out of some ACSs incre…	Rejected	Review
ACO' + 'gene expression'+ 'drought stress' ' plants' + 'PGPR'	Google Scholar	Klebsiella sp. PD3, a phenanthrene (PHE)-degrading strain with plant growth promoting properties enhances the PHE degradation and stress tolerance in rice plants	Li et al., 2020	Phenanthrene (PHE) is harmful to human health and is difficult to be eliminated from environment. In this study, an aerobic bacterium capable of use PHE as a sole carbon source and energy was isolated and classified as Klebsiella sp. PD3 according to 16S rDNA analysis. The degradation efficiency of PHE reached to about 78.6% after 12 days of incubation with strain PD3. Identification of metabolit…	Rejected	No abiotic stress
ACO' + 'gene expression'+ 'drought stress' ' plants' + 'PGPR'	Google Scholar	Soybean Leaf Proteomic Profile Influenced by Rhizobacteria Under Optimal and Salt Stress Conditions	Ilangumaran et al., 2022	Soil salinity is a major abiotic stressor inhibiting plant growth and development by affecting a range of physiological processes. Plant growth promoting rhizobacteria (PGPR) are considered a sustainable option for alleviation of stress and enhancement of plant growth, yet their mode of action is complex and largely unexplored. In this study, an untargeted proteomic approach provided insights int…	Rejected	Proteomic study
ACO' + 'gene expression'+ 'drought stress' ' plants' + 'PGPR'	Google Scholar	Biological and molecular characterization of the response of tomato plants treated with Trichoderma koningiopsis	Moreno et al., 2009	Tomato-Fusarium oxysporum f.sp. radicis-lycopersici pathosystem was used to study induced systemic resistance elicited by Trichoderma koningiopsis (Th003) using the split root model. The ability of the antagonist to promote plant growth was also established. Stem colonization by the pathogen was significantly reduced in treated plants. The induction of resistance was enhanced 6 days after elicita…	Rejected	Fungi
ACO' + 'gene expression'+ 'drought stress' ' plants' + 'PGPR'	Google Scholar	What Did We Learn From Plant Growth-Promoting Rhizobacteria (PGPR)-Grass Associations Studies Through Proteomic and Metabolomic Approaches?	Alberton et al., 2020	Plant growth stimulation by microorganisms that interact in a mutually beneficial manner remains poorly understood. Understanding the nature of plant-bacteria interactions may open new routes for plant productivity enhancement, especially cereal crops consumed by humans. Proteomic and metabolomic analyses are particularly useful for elucidating these mechanisms. A complete depiction of these mech…	Rejected	Review
ACO' + 'gene expression'+ 'drought stress' ' plants' + 'PGPR'	Google Scholar	Rhizobia as a Source of Plant Growth-Promoting Molecules: Potential Applications and Possible Operational Mechanisms	Jaiswal et al., 2021	The symbiotic interaction between rhizobia and legumes that leads to nodule formation is a complex chemical conversation involving plant release of nod-gene inducing signal molecules and bacterial secretion of lipo-chito-oligossacharide nodulation factors. During this process, the rhizobia and their legume hosts can synthesize and release various phytohormones, such as IAA, lumichrome, riboflavin…	Rejected	Review
ACO' + 'gene expression'+ 'drought stress' ' plants' + 'PGPR'	Google Scholar	Characterization and evaluation of Bacillus amyloliquefaciens strain WF02 regarding its biocontrol activities and genetic responses against bacterial wilt in two different resistant tomato cultivars	Huang et al., 2016	Bacillus amyloliquefaciens strain WF02, isolated from soil collected at Wufeng Mountain, Taiwan, has siderophore-producing ability and in vitro antagonistic activity against bacterial wilt pathogen. To determine the impact of plant genotype on biocontrol effectiveness, we treated soil with this strain before infecting susceptible (L390) and moderately resistant (Micro-Tom) tomato cul- tivars with…	Rejected	Biotic stress
ACO' + 'gene expression'+ 'drought stress' ' plants' + 'PGPR'	Google Scholar	Bacterial alleviation of drought stress in plants: Potential mechanisms and challenges	Shilev et al., 2021		Rejected	Book chapter
ACO' + 'gene expression'+ 'drought stress' ' plants' + 'PGPR'	Google Scholar	Microbiome in Plant Health and Disease	Kumar ·et al., 2019		Rejected	Book
ACO' + 'gene expression'+ 'drought stress' ' plants' + 'PGPR'	Google Scholar	Halomonas Rhizobacteria of Avicennia marina of Indian Sundarbans Promote Rice Growth Under Saline and Heavy Metal Stresses Through Exopolysaccharide Production	Mukherjee et al., 2019	The Halomonas species isolated from the rhizosphere of the true mangrove Avicennia marina of Indian Sundarbans showed enhanced rice growth promotion under combined stress of salt and arsenic in pot assay. Interestingly, under abiotic stress conditions, Halomonas sp. Exo1 was observed as an efficient producer of exopolysaccharide. The study revealed that salt triggered exopolysaccharide production…	Rejected	No ACO expression
ACO' + 'gene expression'+ 'drought stress' ' plants' + 'PGPR'	Google Scholar	Plant–Agrobacterium interaction mediated by ethylene and super-Agrobacterium conferring efficient gene transfer	Nonaka et al., 2014	Agrobacterium tumefaciens has a unique ability to transfer genes into plant genomes. This ability has been utilized for plant genetic engineering. However, the efficiency is not sufficient for all plant species. Several studies have shown that ethylene decreased the Agrobacterium-mediated transformation frequency. Thus, A. tumefaciens with an ability to suppress ethylene evolution would increase …	Rejected	Review
ACO' + 'gene expression'+ 'drought stress' ' plants' + 'PGPR'	Google Scholar	Genotypic and Phenotypic Spectrum of Foveal Hypoplasia: A Multi-centre Study	Riseh et al., 2022	Plants are continuously exposed to a wide range of pathogens, including fungi, bacteria, nematodes, and viruses; therefore, survival under these conditions requires a sophisticated defense system. The activation of defense responses and related signals in plants is regulated mainly by the hormones salicylic acid, jasmonic acid, and ethylene. Resistance to pathogen infection can be induced in plan…	Rejected	Review
ACO' + 'gene expression'+ 'drought stress' ' plants' + 'PGPR'	Google Scholar	Drought response of Mucuna pruriens (L.) DC. inoculated with ACC deaminase and IAA producing rhizobacteria	Saleem et al., 2018	Drought is one of the major constraints limiting agricultural production worldwide and is expected to increase in the future. Limited water availability causes significant effects to plant growth and physiology. Plants have evolved different traits to mitigate the stress imposed by drought. The presence of plant growth-promoting rhizobacteria (PGPR) could play an important role in improving plant…	Rejected	Proteomic study
ACO' + 'gene expression'+ 'drought stress' ' plants' + 'PGPR'	Google Scholar	Molecular Regulation of Cotton Fiber Development: A Review	Jan et al., 2022	Cotton (Gossypium spp.) is an economically important natural fiber crop. The quality of cotton fiber has a substantial effect on the quality of cotton textiles. The identification of cotton fiber development-related genes and exploration of their biological functions will not only enhance our understanding of the elongation and developmental mechanisms of cotton fibers but also provide insights t…	Rejected	Review
ACO' + 'gene expression'+ 'drought stress' ' plants' + 'PGPR'	Google Scholar	1-Aminocyclopropane 1-Carboxylic Acid and Its Emerging Role as an Ethylene-Independent Growth Regulator	Polko et al., 2019	1-Aminocyclopropane 1-carboxylic acid (ACC) is the direct precursor of the plant hormone ethylene. ACC is synthesized from S-adenosyl-L-methionine (SAM) by ACC synthases (ACSs) and subsequently oxidized to ethylene by ACC oxidases (ACOs). Exogenous ACC application has been used as a proxy for ethylene in numerous studies as it is readily converted by nearly all plant tissues to ethylene. However,…	Rejected	Review
ACO' + 'gene expression'+ 'drought stress' ' plants' + 'PGPR'	Google Scholar	Physiological responses to humic substances as plant growth promoter	Canellas et al, 2019	Humic substances (HS) have been widely recognized as a plant growth promoter mainly by changes on root architecture and growth dynamics, which result in increased root size, branching and/or greater density of root hair with larger surface area. Stimulation of the H+-ATPase activity in cell membrane suggests that modifications brought about by HS are not only restricted to root structure, but are…	Rejected	Review
ACO' + 'gene expression'+ 'drought stress' ' plants' + 'PGPR'	Google Scholar	Common gene expression patterns are observed in rice roots during associations with plant growth‐promoting bacteria, Herbaspirillum seropedicae and Azospirillum brasilense	Wiggins et al., 2022	Non‐legume plants such as rice and maize can form beneficial associations with plant growth‐ promoting bacteria (PGPB) such as Herbaspirillum seropedicae and Azospirillum brasilense. Several studies have shown that these PGPB promote plant growth via multiple mechanisms. Our current understanding of the molecular aspects and signaling between plants like rice and PGPB like Herbaspirillum seropedi…	Rejected	No abiotic stress
ACO' + 'gene expression'+ 'drought stress' ' plants' + 'PGPR'	Google Scholar	Ethylene response of salt stressed rice seedlings following Ethephon and 1-methylcyclopropene seed priming	Hussain et al., 2020	Salinity stress is one of the most devastating abiotic stresses affecting rice growth and productivity. Several phytohormones in rice contribute towards salinity response, including ethylene (ET). Furthermore, priming of rice seedlings with different chemicals has revealed new insights in rice stress physiology. Therefore, the hydroponic culture experiment under completely randomized design (CRD)…	Rejected	No PGPR
ACO' + 'gene expression'+ 'drought stress' ' plants' + 'PGPR'	Google Scholar	When Salt Meddles Between Plant, Soil, and Microorganisms	Otlewska et al., 2020	In extreme environments, the relationships between species are often exclusive and based on complex mechanisms. This review aims to give an overview of the microbial ecology of saline soils, but in particular of what is known about the interaction between plants and their soil microbiome, and the mechanisms linked to higher resistance of some plants to harsh saline soil conditions. Agricultural s…	Rejected	Review
ACO' + 'gene expression'+ 'drought stress' ' plants' + 'PGPR'	Google Scholar	Plant Hormones under Challenging Environmental Factors	Waśkiewicz et al, 2016		Rejected	Book
ACO' + 'gene expression'+ 'drought stress' ' plants' + 'PGPR'	Google Scholar	Vinegar residue compost as a growth substrate enhances cucumber resistance against the Fusarium wilt pathogen Fusarium oxysporum by regulating physiological and biochemical responses	Shi et al., 2016	Fusarium wilt caused by the fungus Fusarium oxysporum f. sp. cucumerinum (FOC) is the most severe soil- borne disease attacking cucumber. To assess the positive effects of vinegar residue substrate (VRS) on the growth and incidence of Fusarium wilt on cucumber, we determined the cucumber growth parameters, disease severity, defense-related enzyme and pathogenesis-related (PR) protein activities, …	Rejected	Biotic stress
ACO' + 'gene expression'+ 'drought stress' ' plants' + 'PGPR'	Google Scholar	Inoculation of Brevibacterium linens RS16 in Oryza sativa genotypes enhanced salinity resistance: Impacts on photosynthetic traits and foliar volatile emissions	Chatterjee et al., 2018	The emission of volatiles in response to salt stress in rice cultivars has not been studied much to date. Studies ad- dressing the regulation of stress induced volatile emission by halotolerant plant growth promoting bacteria con- taining ACC (1-aminocyclopropane-1-carboxylate) deaminase are also limited. The objective of the present study was to investigate the salt alleviation potential of bact…	Rejected	Proteomic study
ACO' + 'gene expression'+ 'drought stress' ' plants' + 'PGPR'	Google Scholar	Alginate-Induced Disease Resistance in Plants	Riseh et al., 2022		Rejected	Duplicate
ACO' + 'gene expression'+ 'drought stress' ' plants' + 'PGPR'	Google Scholar	Bacteria in Agrobiology: Plant Probiotics	Maheshwari et al., 2012		Rejected	Book
ACO' + 'gene expression'+ 'drought stress' ' plants' + 'PGPR'	Google Scholar	Alleviation of salinity stress in wheat by ACC deaminase-producing Bacillus aryabhattai EWR29 with multifarious plant growth-promoting attributes	Farahat et al., 2020	Salinity is one of the most crucial stressors that restrain crop productivity. Endophytes with 1-aminocyclopropane-1-carboxylic acid (ACC) deaminase activity possess the potential to ameliorate salt stress in plants by degrading the precursor molecule of ethylene, ACC, whose concentration is elevated in salt-stressed plants. The present investigation reports the efficiency of salt-tolerant endoph…	Rejected	Proteomic study
ACO' + 'gene expression'+ 'drought stress' ' plants' + 'PGPR'	Google Scholar	Survey of Genes Involved in Biosynthesis, Transport, and Signaling of Phytohormones with Focus on Solanum lycopersicum	Simm et al., 2020	Phytohormones control the development and growth of plants, as well as their response to biotic and abiotic stress. The seven most well- studied phytohormone classes defined today are as follows: auxins, ethylene, cytokinin, abscisic acid, jasmonic acid, gibberellins, and brassinosteroids. The basic principle of hormone regulation is conserved in all plants, but recent results suggest adaptations…	Rejected	No PGPR
ACO' + 'gene expression'+ 'drought stress' ' plants' + 'PGPR'	Google Scholar	Microbial modulation of plant ethylene signaling: ecological and evolutionary consequences	Ravanbakhsh et al.,2018	The plant hormone ethylene is one of the central regulators of plant development and stress resistance. Optimal ethylene signaling is essential for plant fitness and is under strong selection pressure. Plants upregulate ethylene production in response to stress, and this hormone triggers defense mechanisms. Due to the pleiotropic effects of ethylene, adjusting stress responses to maximize resista…	Rejected	Review
ACO' + 'gene expression'+ 'drought stress' ' plants' + 'PGPR'	Google Scholar	Recent insights on gene expression studies on Hevea Brasiliensis fatal leaf fall diseases	Mohd Afandi et al., 2022	Hevea brasiliensis is one of the most important agricultural commodities globally, heavily cultivated in Southeast Asia. Fatal leaf fall diseases cause aggressive leaf defoliation, linked to lower latex yield and death of crops before maturity. Due to the significant consequences of the disease to H. brasiliensis, the recent gene expression studies from four fall leaf diseases of H. brasiliensis …	Rejected	Review
ACO' + 'gene expression'+ 'drought stress' ' plants' + 'PGPR'	Google Scholar	OMICS approaches towards understanding plant’s responses to counterattack heavy metal stress: An insight into molecular mechanisms of plant defense	Yadav et al., 2021	Under constant climatic change and the existing environment, plants are exposed to several adverse factors such as extreme temperatures, high salt, heavy metals (HMs), drought, and pathogens. Prolonged exposure to such adverse conditions results in phytotoxicity and overall retardation of growth and development. Excess of HMs is one of the significant factors that affects plant growth significant…	Rejected	Review
ACO' + 'gene expression'+ 'drought stress' ' plants' + 'PGPR'	Google Scholar	A split-root system to assess biocontrol effectiveness and defense-related genetic responses in above-ground tissues during the tripartite interaction Verticillium dahliae-olive-Pseudomonas fluorescens PICF7 in roots	Cabanás et al.,2017		Rejected	Biotic stress
ACO' + 'gene expression'+ 'drought stress' ' plants' + 'PGPR'	Google Scholar	Hormonal crosstalk in regulating salinity stress tolerance in graminaceous crops	Choudhary et al., 2021	Soil salinity is one of the major threats that pose challenges to global cereal produc- tivity and food security. Cereals have evolved sophisticated mechanisms to circum- vent stress at morpho-physiological, biochemical, and molecular levels. Salt stress cues are perceived by the roots, which trigger the underlying signaling pathways that involve phytohormones. Each phytohormone triggers a specif…	Rejected	Review
ACO' + 'gene expression'+ 'drought stress' ' plants' + 'PGPR'	Google Scholar	Insights of Lr28 mediated wheat leaf rust resistance: Transcriptomic approach	Singh et al., 2017	Leaf rust is a fungal disease that causes severe yield losses in wheat. Resistant varieties with major and quantitative resistance genes are the most effective method to control the disease. However, the main problem is inadequate information for understanding resistance mechanism and its usefulness. This paper presents Lr28 mediated genome-wide response of known and unknown genes during wheat–Pu…	Rejected	Biotic stress
ACO' + 'gene expression'+ 'drought stress' ' plants' + 'PGPR'	Google Scholar	Bacilli in Climate Resilient Agriculture and Bioprospecting	Islam et al., 2019		Rejected	Book
ACO' + 'gene expression'+ 'drought stress' ' plants' + 'PGPR'	Google Scholar	Principle, diversity, mechanism, and potential of practical application of plant probiotic bacteria for the biocontrol of phytopathogens by induced systemic resistance	Surovy et al., 2021		Rejected	Book chapter
ACO' + 'gene expression'+ 'drought stress' ' plants' + 'PGPR'	Google Scholar	Alleviation of Submergence Stress in Rice Seedlings by Plant Growth-Promoting Rhizobacteria With ACC Deaminase Activity	Bal et al., 2021	Submergence stress slows seed germination, imposes fatalities, and delays seedling establishment in rice. Seeds of submergence susceptible rice variety IR 42 were inoculated with four 1-aminocyclopropane-1-carboxylic acid (ACC) utilizing isolates viz., Bacillus sp. (AR-ACC1), Microbacterium sp. (AR-ACC2), Methylophaga sp. (AR-ACC3), and Paenibacillus sp. (ANR-ACC3) and subjected to submergence st…	Rejected	Proteomic study
ACO' + 'gene expression'+ 'drought stress' ' plants' + 'PGPR'	Google Scholar	Advances in PGPR Research	Ray et al., 2017		Rejected	Conference
ACO' + 'gene expression'+ 'drought stress' ' plants' + 'PGPR'	Google Scholar	Role of environmental factors in shaping the soil microbiome	Islam et al.,2020	The soil microbiome comprises one of the most important and complex components of all terrestrial ecosystems as it harbors millions of microbes including bacteria, fungi, archaea, viruses, and protozoa. Together, these microbes and environmental factors contribute to shaping the soil microbiome, both spatially and temporally. Recent advances in genomic and metagenomic analyses have enabled a more…	Rifiutato	Review
ACO' + 'gene expression'+ 'drought stress' ' plants' + 'PGPR'	Google Scholar	Transcriptome Analyses of Barley Roots Inoculated with Novel Paenibacillus sp. and Erwinia gerundensis Strains Reveal Beneficial Early-Stage Plant–Bacteria Interactions	Li et al., 2021	Plant growth-promoting bacteria can improve host plant traits including nutrient uptake and metabolism and tolerance to biotic and abiotic stresses. Understanding the molecular basis of plant–bacteria interactions using dual RNA-seq analyses provides key knowledge of both host and bacteria simultaneously, leading to future enhancements of beneficial interactions. In this study, dual RNA-seq analy…	Rejected	No abiotic stress
ACO' + 'gene expression'+ 'drought stress' ' plants' + 'PGPR'	Google Scholar	Effect of plant growth-promoting bacteria on the growth and fructan production of Agave americana L.	De La Torre-Ruiz et al., 2016	The effect of plant growth-promoting bacteria inoculation on plant growth and the sugar content in Agave americana was assessed. The bacterial strains ACO-34A, ACO-40, and ACO- 140, isolated from the A. americana rhizosphere, were selected for this study to evaluate their phenotypic and genotypic characteristics. The three bacterial strains were evaluated via plant inoculation assays, and Azospir…	Rejected	No abiotic stress
ACO' + 'gene expression'+ 'drought stress' ' plants' + 'PGPR'	Google Scholar	Brassinosteroids in Plants: Crosstalk with Small- Molecule Compounds	Hu et al., 2021	Brassinosteroids (BRs) are known as the sixth type of plant hormone participating in various physiological and biochemical activities and play an irreplaceable role in plants. Small-molecule compounds (SMCs) such as nitric oxide (NO), ethylene, hydrogen peroxide (H2O2), and hydrogen sulfide (H2S) are involved in plant growth and development as signaling messengers. Recently, the involvement of SM…	Rejected	review
ACO' + 'gene expression'+ 'drought stress' ' plants' + 'PGPR'	Google Scholar	Nitrate Protects Cucumber Plants Against Fusarium oxysporum by Regulating Citrate Exudation	Sun et al., 2016	Fusarium wilt causes severe yield losses in cash crops. Nitrogen plays a critical role in the management of plant disease; however, the regulating mechanism is poorly under- stood. Using biochemical, physiological, bioinformatic and transcriptome approaches, we analyzed how nitrogen forms regulate the interactions between cucumber plants and Fusarium oxysporum f. sp. cucumerinum (FOC). Nitrate si…	Rejected	review
ACO' + 'gene expression'+ 'drought stress' ' plants' + 'PGPR'	Google Scholar	Plant and seed germination responses to global change, with a focus on CO2: A review	Debouza et al., 2021	Earth atmospheric CO2 concentration has risen by over 35% since 1750 and is presently increasing by about 2 parts per million (ppm) every year. Due to contributions from human activity, CO2 is projected to keep rising in the predictable future and to double sometime during this century if fossil fuels burning remains. As a result, air temperature is projected to rise from 2 to 5 °C by 2100. Follo…	Rejected	Review
ACO' + 'gene expression'+ 'drought stress' ' plants' + 'PGPR'	Google Scholar	Biochemical Characterization of the Fusarium graminearum Candidate ACC-Deaminases and Virulence Testing of Knockout Mutant Strains	Svoboda et al., 2019	Fusarium graminearum is a plant pathogenic fungus which is able to infect wheat and other economically important cereal crop species. The role of ethylene in the interaction with host plants is unclear and controversial. We have analyzed the inventory of genes with a putative function in ethylene production or degradation of the ethylene precursor 1-aminocyclopropane carboxylic acid (ACC). F. gra…	Rejected	Biotic stress
ACO' + 'gene expression'+ 'drought stress' ' plants' + 'PGPR'	Google Scholar	External Supplement of Impulsive Micromanager Trichoderma Helps in Combating CO2 Stress in Rice Grown Under FACE	Mishra et al.,2019	The present study aims to explore the alternative way to improve the quality and productivity of rice grown under CO2 stress through an external supplement of Trichoderma as a biofertilizer (BF). The impact of BF-treated rice under elevated CO2 (eCO2) was examined by different plant growth parameters, physiological observations, scanning electron microscopy, microbial com- munity profiling and ex…	Rejected	Fungi
ACO' + 'gene expression'+ 'drought stress' ' plants' + 'PGPR'	Google Scholar	An updated overview of the physiological and molecular responses of rice to anoxia	Adak et al., 2021		Rejected	Review
ACO' + 'gene expression'+ 'drought stress' ' plants' + 'PGPR'	Google Scholar	Nematicidal Volatiles from Bacillus atrophaeus GBSC56 Promote Growth and Stimulate Induced Systemic Resistance in Tomato against Meloidogyne incognita	Ayaz et al., 2021	Bacillus volatiles to control plant nematodes is a topic of great interest among researchers due to its safe and environmentally friendly nature. Bacillus strain GBSC56 isolated from the Ti- bet region of China showed high nematicidal activity against M. incognita, with 90% mortality as compared with control in a partition plate experiment. Pure volatiles produced by GBSC56 were identified throug…	Rejected	Biotic stress
ACO' + 'gene expression'+ 'drought stress' ' plants' + 'PGPR'	Google Scholar	Whole Genome Analysis of Sugarcane Root-Associated Endophyte Pseudomonas aeruginosa B18—A Plant Growth-Promoting Bacterium With Antagonistic Potential Against Sporisorium scitamineum	Singh et al., 2021	Sugarcane smut is a significant fungal disease that causes a major loss in sugar yield and quality. In this study, we isolated an endophytic strain B18 from a sugarcane root, which showed plant growth-promotion, hydrolytic enzyme production, antifungal activity against sugarcane pathogens (Sporisorium scitamineum, Ceratocystis paradoxa, Fusarium verticillioides), and the presence of nifH, acdS, a…	Rejected	Biotic stress
ACO' + 'gene expression'+ 'drought stress' ' plants' + 'PGPR'	Google Scholar	Response of Mediterranean Ornamental Plants to Drought Stress	Toscano et al., 2019	Ornamental plants use unique adaptive mechanisms to overcome the negative effects of drought stress. A large number of species grown in the Mediterranean area offer the opportunity to select some for ornamental purposes with the ability to adapt to drought conditions. The plants tolerant to drought stress show different adaptation mechanisms to overcome drought stress, including morphological, ph…	Rejected	Review
ACO' + 'gene expression'+ 'drought stress' ' plants' + 'PGPR'	Google Scholar	Comparative effects of ethylene inhibitors on Agrobacterium-mediated transformation of drought-tolerant wild watermelon	Malambane et al., 2018	Ethylene (C2H4), a phytohormone that is produced in response to both abiotic and biotic stresses, is an important factor influencing the efficiency of Agrobacterium-mediated transformation. In this study, effects of various ethylene inhibitors on the efficiency of Agrobacterium-mediated genetic transformation in drought-tolerant wild watermelon was comparatively examined. Consequently, in compari…	Rejected	No PGPR
ACO' + 'gene expression'+ 'drought stress' ' plants' + 'PGPR'	Google Scholar	Microbiological Advancements for Higher Altitude Agro-Ecosystems & Sustainability	Goel et al., 2020		Rejected	Book
ACO' + 'gene expression'+ 'drought stress' ' plants' + 'PGPR'	Google Scholar	Translational Research on Trichoderma: From ’Omics to the Field	Lorito et al., 2010	Structural and functional genomics investigations are making an impor- tant impact on the current understanding and application of microbial agents used for plant disease control. Here, we review the case of Tricho- derma spp., the most widely applied biocontrol fungi, which have been extensively studied using a variety of research approaches, including genomics, transcriptomics, proteomics, meta…	Rejected	Review
ACO' + 'gene expression'+ 'drought stress' ' plants' + 'PGPR'	Google Scholar	Halotolerant Plant Growth Promoting Bacteria Mediated Salinity Stress Amelioration in Plants	Shin et al., 2016	Soil salinization refers to the buildup of salts in soil to a level toxic to plants. The major factors that contribute to soil salinity are the quality, the amount and the type of irrigation water used. The presented review discusses the different sources and causes of soil salinity. The effect of soil salinity on biological processes of plants is also discussed in detail. This is followed by a d…	Rejected	Review
ACO' + 'gene expression'+ 'drought stress' ' plants' + 'PGPR'	Google Scholar	Biological Control of Plant Pathogens: A Global Perspective	Lahlali et al., 2022	The increase in the world population has generated an important need for both quality and quantity agricultural products, which has led to a significant surge in the use of chemical pesticides to fight crop diseases. Consumers, however, have become very concerned in recent years over the side effects of chemical fungicides on human health and the environment. As a result, research into alternativ…	Rejected	Review
ACO' + 'gene expression'+ 'drought stress' ' plants' + 'PGPR'	Google Scholar	Physiological Alteration in Sunflower Plants (Helianthus annuus L.) Exposed to High CO2 and Arbuscular Mycorrhizal Fungi	Bellido et al., 2021	Sunflower plants (Helianthus annuus L.) in a CO2-enriched atmosphere (eCO2) were used herein to examine the developmental and physiological effects of biofertilization with mycorrhizae (Rhizophagus irregularis). The eCO2 environment stimulated colonization using R. irregularis mycor- rhizal fungi, as compared to plants grown under ambient CO2 conditions (aCO2). This colonization promotes plant gr…	Rejected	Fungi
ACO' + 'gene expression'+ 'drought stress' ' plants' + 'PGPR'	Google Scholar	Proteomic Profiling and Protein-Protein Interaction Network Reveal the Molecular Mechanisms of Susceptibility to Drought Stress in Canola (Brassica napus L.)	Shokri-Gharelo et al., 2022	Drought stress is one of the most important abiotic stresses that plants face frequently in nature. Under drought conditions, many morphological, physiological, and molecular aspects of plants are changed and as a result plants experience a remarkable reduction in growth, yield, and reproduction. To expand our understanding of the mole- cular basis of the plant response to drought stress, the pro…	Rejected	No PGPR
ACO' + 'gene expression'+ 'drought stress' ' plants' + 'PGPR'	Google Scholar	Pseudomonas sp. UW4 acdS gene promotes primordium initiation and fruiting body development of Agaricus bisporus	Zhang et al.,2019	To simplify industrial mushroom cultivation, we introduced a bacterial Pseudomonas sp. UW4 acdS gene, encoding 1-ami- nocyclopropane-1-carboxylic acid (ACC) deaminase (AcdS), into fungus Agaricus bisporus. Transformant A. bisporus- acdS14 cased with sterilized-vermiculite generated primordia 5 days sooner than wild-type strain, confirming the specific role of the AcdS enzyme. Being consistent wit…	Rejected	No abiotic stress
ACO' + 'gene expression'+ 'drought stress' ' plants' + 'PGPR'	Google Scholar	Innovative Approaches for Sustainable Development	Hussan		Rejected	Book
ACO' + 'gene expression'+ 'drought stress' ' plants' + 'PGPR'	Google Scholar	Role of NO in plants: a current update	Rasheed et al., 2022		Rejected	Book
ACO' + 'gene expression'+ 'drought stress' ' plants' + 'PGPR'	Google Scholar	Elicitor recognition, signal transduction and induced resistance in plants	Mishra et al., 2011	The most viable and practical option for the management of plant diseases is disease resistance. However, in most of the crop plants, natural resistance against pathogens is rare. Breeding resistant varieties is a long-term process and the possibility of resistance being broken always exists. Induced resistance exploiting natural defense machinery of plants is indeed an alternative, nonconvention…	Rejected	Review
ACO' + 'gene expression'+ 'drought stress' ' plants' + 'PGPR'	Google Scholar	ETHYLENE: MULTI-TASKER IN PLANT–ATTACKER INTERACTIONS	Van der Ent and Pieterse, 2012	In the past decades, the role of ethylene in the regulation of plant re- sponses to biotic stress has been intensively studied. Analyses of plant genotypes that are impaired in ethylene biosynthesis, perception or signalling revealed an im- portant role for ethylene in the primary response to pathogen attack. In addition, ethylene has been demonstrated to fulfil a key function in the control of s…	Rejected	Review
ACO' + 'gene expression'+ 'drought stress' ' plants' + 'PGPR'	Google Scholar	The plant growth‐promoting bacteria, Azospirillum brasilense, induce a diverse array of genes in rice shoots and promote their growth	Cook et al.,2022	Plant growth-promoting bacteria like Azospirillum brasilense can benefit non-legume crops such as rice and corn by improv- ing their growth and yield. However, there are still gaps in our knowledge of the molecular mechanisms that regulate these significant plant–microbe interactions. Some recent studies have identified gene expression changes in plant roots during these associations. But very fe…	Rejected	No abiotic stress
ACO' + 'gene expression'+ 'drought stress' ' plants' + 'PGPR'	Google Scholar	Long-term phytoremediation using the symbiotic Pongamia pinnata reshaped soil micro-ecological environment	Yu et al., 2021	Understanding the effects of phytoremediation on ecological environments is a core issue in soil bioremediation. However, the response of soil micro-ecological environment to long-term phytoremediation of symbiotic legume is still unknown. To address this issue, we focused on the changes of soil physicochemical properties, microbial communities, ecological functions, and correlation relationships…	Rejected	Phylogenetic study
ACO' + 'gene expression'+ 'drought stress' ' plants' + 'PGPR'	Google Scholar	Changes in physiological and photosynthetic parameters in tomato of different ethylene status under salt stress: Effects of exogenous 1-amino- cyclopropane-1-carboxylic acid treatment and the inhibition of ethylene signalling	Borbély et al., 2020	Although ethylene (ET) is an important participant in plant responses to salt stress, its role in the early period of acclimation, especially in the case of photosynthesis has not been revealed in detail. In this study, the effects of tolerable (100 mM) or lethal (250 mM) NaCl concentrations were investigated in hydroponically grown tomato (Solanum lycopersicum L. cv. Ailsa Craig) plants of diffe…	Rejected	Proteomic study
ACO' + 'gene expression'+ 'drought stress' ' plants' + 'PGPR'	Google Scholar	Beneficial Plant-Bacterial Interactions	Glick et al., 2020		Rejected	Book
ACO' + 'gene expression'+ 'drought stress' ' plants' + 'PGPR'	Google Scholar	Bacilli in Climate Resilient Agriculture and Bioprospecting	Islam et al., 2019		Rejected	Duplicate
ACO' + 'gene expression'+ 'drought stress' ' plants' + 'PGPR'	Google Scholar	Stress Signaling in Plants: Genomics and Proteomics Perspective, Volume 2	Romera et al., 2016		Rejected	Book
ACO' + 'gene expression'+ 'drought stress' ' plants' + 'PGPR'	Google Scholar	Rhizosphere Biology	Gupta et al., 2021		Rejected	Book
ACO' + 'gene expression'+ 'drought stress' ' plants' + 'PGPR'	Google Scholar	Trichoderma Host Pathogen Interactions and Applications	Sharma et al., 2020		Rejected	Book
ACO' + 'gene expression'+ 'drought stress' ' plants' + 'PGPR'	Google Scholar	Impacts of Atmospheric CO2 and Soil Nutritional Value on Plant Responses to Rhizosphere Colonization by Soil Bacteria	Williams et al., 2018	Concerns over rising atmospheric CO2 concentrations have led to growing interest in the effects of global change on plant-microbe interactions. As a primary substrate of plant metabolism, atmospheric CO2 influences below-ground carbon allocation and root exudation chemistry, potentially affecting rhizosphere interactions with beneficial soil microbes. In this study, we have examined the effects o…	Rejected	No abiotic stress
ACO' + 'gene expression'+ 'drought stress' ' plants' + 'PGPR'	Google Scholar	Implications of reactive oxygen and nitrogen species in seed physiology for sustainable crop productivity under changing climate conditions	Kumar et al., 2021	Reactive oxygen species (ROS) and reactive nitrogen species (RNS) incessantly produced as by-products of meta- bolism play significant roles in seed physiology. ROS (hydroxyl, superoxide radical and hydrogen peroxide) and RNS (nitric oxide, nitric dioxide, nitrous acid and dinitrogen tetroxide) content changes in all phases of seed life cycle that influence seed germination, dormancy and longevit…	Rejected	Review
ACO' + 'gene expression'+ 'drought stress' ' plants' + 'PGPR'	Google Scholar	The Role of Phytohormones in Combating Biotic stress	Akbar et al., 2021.		Rejected	Biotic stress
ACO' + 'gene expression'+ 'drought stress' ' plants' + 'PGPR'	Google Scholar	Plant Growth Promotion Abilities of Phylogenetically Diverse Mesorhizobium Strains: Effect in the Root Colonization and Development of Tomato Seedlings	Menéndez et al., 2020	Mesorhizobium contains species widely known as nitrogen-fixing bacteria with legumes, but their ability to promote the growth of non-legumes has been poorly studied. Here, we analyzed the production of indole acetic acid (IAA), siderophores and the solubilization of phosphate and potassium in a collection of 24 strains belonging to different Mesorhizobium species. All these strains produce IAA, 4…	Rejected	Phylogenetic study
ACO' + 'gene expression'+ 'drought stress' ' plants' + 'PGPR'	Google Scholar	Ureide metabolism in plant-associated bacteria: purine plant-bacteria interactive scenarios under nitrogen deficiency	Izaguirre-Mayoral et al., 2018	Background The erratic alterations in climate being ex- perienced in agriculture, such as extended periods of drought or heavy rainfalls, are bringing increasing con- cerns about nitrogen (N) management. Even in high- input farming systems, unpredictable weather patterns can cause N deficiencies and result in nutrient losses that contribute to major pollution issues in groundwater, lakes, and eve…	Rejected	Review
ACO' + 'gene expression'+ 'drought stress' ' plants' + 'PGPR'	Google Scholar	Comparison of bacterial communities and their functional profiling using 16S rRNA gene sequencing between the inherent serpentine-associated sites, hyper-accumulator, downgradient agricultural farmlands, and distal non-serpentine soils	Nagarajan et al., 2022	This study aims to determine and compare the bacterial community and functional profiles associated with serpentine sites, innate hyper-accumulating weed, downgradient agricultural farmlands and non-serpentine sites using 16S rRNA gene sequencing. Elemental analysis revealed that the serpentine rock and weathered soil have higher magnesium, nickel, chromium, magnesium/calcium and lower calcium/ma…	Rejected	No abiotic stress
ACO' + 'gene expression'+ 'drought stress' ' plants' + 'PGPR'	Google Scholar	Research Advances in the Mutual Mechanisms Regulating Response of Plant Roots to Phosphate Deficiency and Aluminum Toxicity	Chen et al., 2022	Low phosphate (Pi) availability and high aluminum (Al) toxicity constitute two major plant mineral nutritional stressors that limit plant productivity on acidic soils. Advances toward the identification of genes and signaling networks that are involved in both stresses in model plants such as Arabidopsis thaliana and rice (Oryza sativa), and in other plants as well have revealed that some factors…	Rejected	Review
ACO' + 'gene expression'+ 'drought stress' ' plants' + 'PGPR'	Google Scholar	Biological Control of Plant Pathogens: A Global Perspective	Lahlali et al., 2022		Rejected	Duplicate
ACO' + 'gene expression'+ 'drought stress' ' plants' + 'PGPR'	Google Scholar	Selection and validation of reference genes for quantitative gene expression analyses in persimmon (Diospyros kaki Thunb.) using real-time quantitative PCR	Du et al., 2019	Background and aims: Persimmon (Diospyros kaki) is an economically important fruit tree species with complex flowering characteristics. To obtain accurate expression pattern analysis results, it is vital to select a reliable gene for the normalization of real-time quantitative polymerase chain reaction data. The aim of this study was to identify the optimal internal control gene among six candida…	Rejected	No PGPR
ACO' + 'gene expression'+ 'drought stress' ' plants' + 'PGPR'	Google Scholar	Drought and Elevated CO2 Impacts Photosynthesis and Biochemicals of Basil (Ocimum basilicum L.)	Barickman et al., 2021	Drought-induced reduction in crop growth and productivity can be compensated by increasing atmospheric carbon dioxide (CO2), a significant contributor to climate change. Drought stress (DS) affects crops worldwide due to dwindling water resources and irregular rainfall patterns. The experiment was set up under a randomized complete block design within a three-by-two factorial arrangement. Six SPA…	Rejected	No PGPR
ACO' + 'gene expression'+ 'drought stress' ' plants' + 'PGPR'	Google Scholar	Integrative hormone and transcriptome analysis underline the role of abscisic acid in seed shattering of weedy rice	Lang et al., 2021	Weedy rice is one of the most severe weeds in paddy fields, characterized by its high degree of seed shattering. Abscisic acid (ABA) serves as an abscission-accelerating signal and plays a critical role during abscission. However, mechanisms that link ABA and seed shattering remain elusive. In this study, WR04-6 (shattering) and SN9816 (non-shattering) were used to investigate the expression leve…	Rejected	No PGPR
ACO' + 'gene expression'+ 'drought stress' ' plants' + 'PGPR'	Google Scholar	Postharvest Biology and Technology of Fruits, Vegetables, and Flowers	Paliyath et al., 2008		Rejected	Book
ACO' + 'gene expression'+ 'drought stress' ' plants' + 'PGPR'	Google Scholar	Succession of the Resident Soil Microbial Community in Response to Periodic Inoculations	Wang, et al., 2021	To maintain the beneficial effects of microbial inoculants on plants and soil, repeated inoculation represents a promising option. Until now, the impacts of one-off inoculation on the native microbiome have been explored, but it remains unclear how long and to what extent the periodic inoculations would affect the succession of the resident microbiome in bulk soil. Here, we examined the dynamic r…	Rejected	No PGPR
ACO' + 'gene expression'+ 'drought stress' ' plants' + 'PGPR'	Google Scholar	Legumes Protease Inhibitors as Biopesticides and Their Defense Mechanisms against Biotic Factors	Rodríguez-Sifuentes et al., 2020	Legumes are affected by biotic factors such as insects, molds, bacteria, and viruses. These plants can produce many different molecules in response to the attack of phytopathogens. Protease inhibitors (PIs) are proteins produced by legumes that inhibit the protease activity of phytopathogens. PIs are known to reduce nutrient availability, which diminishes pathogen growth and can lead to the death…	Rejected	review
ACO' + 'gene expression'+ 'drought stress' ' plants' + 'PGPR'	Google Scholar	A Glucuronic Acid-Producing Endophyte Pseudomonas sp. MCS15 Reduces Cadmium Uptake in Rice by Inhibition of Ethylene Biosynthesis	Qian et al., 2022	Dynamic regulation of phytohormone levels is pivotal for plant adaptation to harmful conditions. It is increasingly evidenced that endophytic bacteria can regulate plant hormone levels to help their hosts counteract adverse effects imposed by abiotic and biotic stresses, but the mechanisms underlying the endophyte-induced stress resistance of plants remain largely elusive. In this study, a glucur…	Rejected	No PGPR	in realtà ci sono i PGPR. C'è espressione ACO e ACS
ACO' + 'gene expression'+ 'drought stress' ' plants' + 'PGPR'	Google Scholar	Plant–Microbe Interaction: Aboveground to Belowground, from the Good to the Bad	Nadarajah et al., 2021	Soil health and fertility issues are constantly addressed in the agricultural industry. Through the continuous and prolonged use of chemical heavy agricultural systems, most agricultural lands have been impacted, resulting in plateaued or reduced productivity. As such, to invigorate the agricultural industry, we would have to resort to alternative practices that will restore soil health and ferti…	Rejected	Review
ACO' + 'gene expression'+ 'drought stress' ' plants' + 'PGPR'	Google Scholar	Clover Root Exudates Favor Novosphingobium sp. HR1a Establishment in the Rhizosphere and Promote Phenanthrene Rhizoremediation	Molina et al.,2021	Rhizoremediation is based on the ability of microorganisms to metabolize nutrients from plant root exudates and, thereby, to cometabolize or even mineralize toxic environmental contaminants. Novosphingobium sp. HR1a is a bacterial strain able to degrade a wide variety of polycyclic aromatic hydrocarbons (PAHs). Here, we have demonstrated that the number of CFU in microcosms vegetated with clover …	Rejected	No abiotic stress
ACO' + 'gene expression'+ 'drought stress' ' plants' + 'PGPR'	Google Scholar	Transcriptomic and Metabolomic Approaches Deepen Our Knowledge of Plant–Endophyte Interactions	Chen et al., 2022	In natural systems, plant–symbiont–pathogen interactions play important roles in mitigating abiotic and biotic stresses in plants. Symbionts have their own special recognition ways, but they may share some similar characteristics with pathogens based on studies of model microbes and plants. Multi-omics technologies could be applied to study plant–microbe interactions, especially plant–endophyte i…	Rejected	Review
ACO' + 'gene expression'+ 'drought stress' ' plants' + 'PGPR'	Google Scholar	Transcriptional analysis identifies major pathways as response components to Sporisorium scitamineum stress in sugarcane	Huang et al., 2018	Background: Sugarcane smut, which is caused by Sporisorium scitamineum, is a severe fungal disease affecting sugarcane. However, the major pathways involved in the interaction between sugarcane and S. scitamineum remains unclear. Results: In the present study, suppression subtractive hybridization (SSH) library construction, together with reverse northern blotting, was conducted on the most preva…	Rejected	Biotic stress
ACO' + 'gene expression'+ 'drought stress' ' plants' + 'PGPR'	Google Scholar	Arbuscular mycorrhizal fungi alter microbiome structure of rhizosphere soil to enhance maize tolerance to La	Hao et al., 2021	Rhizosphere microbes are essential partners for plant stress tolerance. Recent studies indicate that arbuscular mycorrhizal fungi (AMF) can facilitate the revegetation of soils contaminated by heavy metals though interacting with rhizosphere microbiome. However, it is unclear how AMF affect rhizosphere microbiome to improve the growth of plant under rare earth elements (REEs) stress. AMF (Claroid…	Rejected	Fungi
ACO' + 'gene expression'+ 'drought stress' ' plants' + 'PGPR'	Google Scholar	The photosynthetic bacteria Rhodobacter capsulatus and Synechocystis sp. PCC 6803 as new hosts for cyclic plant triterpene biosynthesis	Loeschcke et al., 2017.	Cyclic triterpenes constitute one of the most diverse groups of plant natural products. Besides the intriguing biochemistry of their biosynthetic pathways, plant triterpenes exhibit versatile bioactivities, including antimicrobial effects against plant and human pathogens. While prokaryotes have been extensively used for the heterologous production of other classes of terpenes, the synthesis of c…	Rejected	No PGPR
ACO' + 'gene expression'+ 'drought stress' ' plants' + 'PGPR'	Google Scholar	Plant growth promoting rhizobacteria in phytoremediation of environmental contaminants: challenges and future prospects	Prakash et al., 2019		Rejected	Book chapter
ACO' + 'gene expression'+ 'drought stress' ' plants' + 'PGPR'	Google Scholar	Comparative Genomics of Plant-Associated Pseudomonas spp.: Insights into Diversity and Inheritance of Traits Involved in Multitrophic Interactions	Loper et al., 2012	We provide here a comparative genome analysis of ten strains within the Pseudomonas fluorescens group including seven new genomic sequences. These strains exhibit a diverse spectrum of traits involved in biological control and other multitrophic interactions with plants, microbes, and insects. Multilocus sequence analysis placed the strains in three sub- clades, which was reinforced by high level…	Rejected	No abiotic stress
ACO' + 'gene expression'+ 'drought stress' ' plants' + 'PGPR'	Google Scholar	Increasing atmospheric CO2 differentially supports arsenite stress mitigating impact of arbuscular mycorrhizal fungi in wheat and soybean plants	AbdElgawad et al., 2022	Arbuscular mycorrhizal fungi (AMF) are beneficial for the plant growth under heavy metal stress. Such beneficial effect is improved by elevated CO2 (eCO2). However, the mechanisms by which eCO2 improves AMF symbiotic associations under arsenite (AsIII) toxicity are hardly studied. Herein, we compared these regulatory mechanisms in species from two agronomical important plant families – grasses (w…	Rejected	fungi
ACO' + 'gene expression'+ 'drought stress' ' plants' + 'PGPR'	Google Scholar	The rhizosphere microbiome and growth-promoting rhizobacteria of the Brazilian juçara palm	de Castilho et al., 2020	Juçara palm (Euterpe edulis Mart.) is a native species of great ecological and economic importance that occurs in the Brazilian Atlantic Forest. The illegal harvesting of wild juçara palm heart has brought the species onto the endangered species list. Thus, this study aims to isolate, characterize, and select native bacterial strains asso- ciated with E. edulis and estimate the correlation betwee…	rejected	No ACO
ACO' + 'gene expression'+ 'drought stress' ' plants' + 'PGPR'	Google Scholar	Genomic Analysis of Endophytic Bacillus cereus T4S and Its Plant Growth-Promoting Traits	Adeleke et al., 2021	Insights into plant endophytic microbes and their exploration in agriculture have provided opportunities for sustainable plant health and food safety. Notable endophytic Bacillus species with plant growth-promoting traits have been documented; nevertheless, information on genome analysis of B. cereus associated with the sunflower in South Africa has not been studied. Therefore, we present whole-g…	Rejected	No abiotic stress
ACO' + 'gene expression'+ 'drought stress' ' plants' + 'PGPR'	Google Scholar	Monitoring of Rice Transcriptional Responses to Contrasted Colonizing Patterns of Phytobeneficial Burkholderia s.l. Reveals a Temporal Shift in JA Systemic Response	King et al., 2019	In the context of plant–pathogen and plant–mutualist interactions, the underlying molecular bases associated with host colonization have been extensively studied. However, it is not the case for non-mutualistic beneficial interactions or associative symbiosis with plants. Particularly, little is known about the transcriptional regulations associated with the immune tolerance of plants towards ben…	Rejected	No abiotic stress
ACO' + 'gene expression'+ 'drought stress' ' plants' + 'PGPR'	Google Scholar	Morphological and Molecular Analyses of the Interaction between Rosa multiflora and Podosphaera pannosa	Bao et al., 2017	Powdery mildew disease caused by Podosphaera pannosa is the most widespread disease in global cut-rose production, as well as a major disease in garden and pot roses. In this study, the powdery mildew resistance of different wild rose varieties was evaluated. Rose varieties with high resistance and high sensitivity were used for cytological observation and transcriptome and expression profile ana…	Rejected	No abiotic stress
ACO' + 'gene expression'+ 'drought stress' ' plants' + 'PGPR'	Google Scholar	Plant Growth Promotion Abilities of Phylogenetically Diverse Mesorhizobium Strains: Effect in the Root Colonization and Development of Tomato Seedlings	Menéndez et al., 2020		Rejected	Duplicate
ACO' + 'gene expression'+ 'drought stress' ' plants' + 'PGPR'	Google Scholar	Genome-Wide Characterization of Salt-Responsive miRNAs, circRNAs and Associated ceRNA Networks in Tomatoes	Wang et al., 2021	Soil salinization is a major environmental stress that causes crop yield reductions world- wide. Therefore, the cultivation of salt-tolerant crops is an effective way to sustain crop yield. Tomatoes are one of the vegetable crops that are moderately sensitive to salt stress. Global mar- ket demand for tomatoes is huge and growing. In recent years, the mechanisms of salt tolerance in tomatoes have…	Rejected	No PGPR
ACO' + 'gene expression'+ 'drought stress' ' plants' + 'PGPR'	Google Scholar	Genomic insights into the broad antifungal activity, plant-probiotic properties, and their regulation, in Pseudomonas donghuensis strain SVBP6	Agaras et al., 2018	Plant-growth promotion has been linked to the Pseudomonas genus since the beginning of this research field. In this work, we mined the genome of an Argentinean isolate of the recently described species P. donghuensis. Strain SVBP6, isolated from bulk soil of an agri- cultural plot, showed a broad antifungal activity and several other plant-probiotic activities. As this species has been recently d…	Rejected	Biotic stress
ACO' + 'gene expression'+ 'drought stress' ' plants' + 'PGPR'	Google Scholar	δ13C measurements to monitor the water status of grapevine	van Leeuwen et al., 2009		Rejected	Conference
ACO' + 'gene expression'+ 'drought stress' ' plants' + 'PGPR'	Google Scholar	Characterization of the rootstock effect on the response of vine transpiration during a drought cycle	Marguerit et al., 2009		Rejected	Conference
ACO' + 'gene expression'+ 'drought stress' ' plants' + 'PGPR'	Google Scholar	Extending Mapman ontology for grapevine	Rotter et al., 2009		Rejected	Conference
ACO' + 'gene expression'+ 'drought stress' ' plants' + 'PGPR'	Google Scholar	Biochemical and Metabolic Plant Responses toward Polycyclic Aromatic Hydrocarbons and Heavy Metals Present in Atmospheric Pollution	Molina et al., 2021	Heavy metals (HMs) and polycyclic aromatic hydrocarbons (PAHs) are toxic components of atmospheric particles. These pollutants induce a wide variety of responses in plants, leading to tolerance or toxicity. Their effects on plants depend on many different environmental conditions, not only the type and concentration of contaminant, temperature or soil pH, but also on the physiological or genetic …	Rejected	Review
ACO' + 'gene expression'+ 'drought stress' ' plants' + 'PGPR'	Google Scholar	Mechanism of arsenic resistance in endophytic bacteria isolated from endemic plant of mine tailings and their arsenophore production	Román-Ponce et al., 2018	Arsenic contamination is an important environmental problem around the world since its high toxicity, and bacteria resist to this element serve as valuable resource for its bioremediation. Aiming at searching the arsenic-resistant bacteria and deter- mining their resistant mechanism, a total of 27 strains isolated from roots of Prosopis laevigata and Spharealcea angustifolia grown in a heavy meta…	Rejected	No ACO
ACO' + 'gene expression'+ 'drought stress' ' plants' + 'PGPR'	Google Scholar	Soil remediation approach and bacterial community structure in a long-term contaminated soil by a mining spill (Aznalcóllar, Spain)	Paniagua-López et al., 2021	The Aznalcóllar accident, which occurred in 1998, spilled 36 × 105 m3 of pyritic sludge and 9 × 105 m3 of acidic water around an area of 43 km2 in the south of Spain. This spill is considered one of the most important metal-mining as- sociated accidents worldwide. In this study, two soil remediation techniques were evaluated: the addition of marble sludge (liming treatment, LS) and the mixing of …	Rejected	No ACO
ACO' + 'gene expression'+ 'drought stress' ' plants' + 'PGPR'	Google Scholar	The Nexus between Fire and Soil Bacterial Diversity in the African Miombo Woodlands of Niassa Special Reserve, Mozambique	Maquia et al., 2021	(1) Background: the Miombo woodlands comprise the most important vegetation from southern Africa and are dominated by tree legumes with an ecology highly driven by fires. Here, we report on the characterization of bacterial communities from the rhizosphere of Brachystegia boehmii in different soil types from areas subjected to different regimes. (2) Methods: bacterial communities were identified …	Rejected	No abiotic stress
ACO' + 'gene expression'+ 'drought stress' ' plants' + 'PGPR'	Google Scholar	Physiological effect of melatonin, IAA and their precursor on quality and quantity of chickpea plants grown under sandy soil conditions	El-Awadi et al., 2017	The physiological effect of melatonin, IAA and their precursor (tryptophan) as seed priming on quantity and quality of chickpea plants was investigated during two growing seasons of 2013/2014 and 2014/2015 under sandy soil conditions at the Research and Production Station, National Research Centre, Nubaria Province, Behaira Governorate, Egypt. Data show that melatonin treatments showed the most p…	Rejected	Proteomic study
ACO' + 'gene expression'+ 'drought stress' ' plants' + 'PGPR'	Google Scholar	PaACL silencing accelerates flower senescence and changes the proteome to maintain metabolic homeostasis in Petunia hybrida	Zhao et al., 2020	Cytosolic acetyl-CoA is an intermediate of the synthesis of most secondary metabolites and the source of acetyl for protein acetylation. The formation of cytosolic acetyl-CoA from citrate is catalysed by ATP-citrate lyase (ACL). However, the function of ACL in global metabolite synthesis and global protein acetylation is not well known. Here, four genes, PaACLA1, PaACLA2, PaACLB1, and PaACLB2, wh…	Rejected	No abiotic stress
ACO' + 'gene expression'+ 'drought stress' ' plants' + 'PGPR'	Google Scholar	Effects of Nanoparticles on Plant Growth-Promoting Bacteria in Indian Agricultural Soil	Chavan et al., 2019	Soil bacteria are some of the key players affecting plant productivity. Soil today is exposed to emerging contaminants like metal engineered nanoparticles. The objective of this study was to evaluate the toxicological effects of silver and zinc oxide nanoparticles on bacteria classified as plant growth-promoting bacteria. Three types of bacteria—nitrogen fixers, phosphate solubilizers, and biofil…	Rejected	No abiotic stress
ACO' + 'gene expression'+ 'drought stress' ' plants' + 'PGPR'	Google Scholar	Genome analysis provides insights into crude oil degradation and biosurfactant production by extremely halotolerant Halomonas desertis G11 isolated from Chott El-Djerid salt-lake in Tunisian desert	Neifar et al., 2019	Here, we report the genomic features and the bioremediation potential of Halomonas desertis G11, a new halophilic species which uses crude oil as a carbon and energy source and displays intrinsic resistance to salt stress conditions (optimum growth at 10% NaCl). G11 genome (3.96 Mb) had a mean GC content of 57.82%, 3622 coding sequences, 480 subsystems and 64 RNA genes. Annotation predicted 38 ge…	Rejected	No abiotic stress
ACO' + 'gene expression'+ 'drought stress' ' plants' + 'PGPR'	Google Scholar	Recent developments in environmental mercury bioremediation and its toxicity: A review	Kumari et al., 2020	Mercury (Hg), a global pollutant produced by anthropogenic and natural means acts as a bioacumulative toxin that severely affects our environment and human lives. Besides being a potent neurotoxin, mercury has several adverse effects on all the major body systems. Mercury changes its chemical forms in the environment and travels from place to place and finally it gets deposited deep down into soi…	Rejected	Review
ACO' + 'gene expression'+ 'drought stress' ' plants' + 'PGPR'	Google Scholar	Agronomic Performance Of S1 Maize Lines Derived From A Bi-Parental Cross Under Infested And Striga Free Environments	Yacoubou et al., 2021	Striga hermonthica, causes up to 100% yield loss in maize production in sub-Saharan Africa. Developing Striga resistant maize cultivars could be a major component of integrated Striga management strategies. This study aims at assessing the agronomic performance of S1 breeding lines in improving maize for Striga resistance. Two hundred S1 lines have been evaluated under artificial infestation Stri…	Rejected	Biotic stress
ACO' + 'gene expression'+ 'drought stress' ' plants' + 'PGPR'	Google Scholar	Biochemical and Metabolic Plant Responses toward Polycyclic Aromatic Hydrocarbons and Heavy Metals Present in Atmospheric Pollution	Molina et al., 2021		Rejected	Duplicate
ACO' + 'gene expression'+ 'drought stress' ' plants' + 'PGPR'	Google Scholar	Cyanobacterial inoculation in elevated CO2 environment stimulates soil C enrichment and plant growth of tomato	Kokila et al., 2021	The present study investigated the influence of cyanobacterial inoculants viz., Anabaena laxa (A.laxa) ), Calothrix elenkinii (C. elenkinii) and Anabaena torulosa- Trichoderma viride (An-Tr) under ambient (aCO2) and elevated (eCO2) conditions, on soil and plant parameters, when grown with/without tomato crop. Significant enhancement in soil chlorophyll, proteins, polysaccharide content, total lea…	Rejected	No abiotic stress
aco AND gene AND expression AND drought AND stress AND plants AND pgpr	SCOPUS	Plant–microbe interaction: Aboveground to belowground, from the good to the bad	Nadarajah et al., 2021		Rejected	Duplicate
aco AND gene AND expression AND drought AND stress AND plants AND pgpr	SCOPUS	Transcriptome analyses of barley roots inoculated with novel paenibacillus sp. And erwinia gerundensis strains reveal beneficial early-stage plant–bacteria interactions	Li et al., 2021		Rejected	Duplicate
aco AND gene AND expression AND drought AND stress AND plants AND pgpr	SCOPUS	Microbial enzyme, 1-aminocyclopropane-1-carboxylic acid (ACC) deaminase: An elixir for plant under stress	Jha et al., 2021		Rejected	Duplicate
aco AND gene AND expression AND drought AND stress AND plants AND pgpr	SCOPUS	ACC deaminase containing endophytic bacteria ameliorate salt stress in Pisum sativum through reduced oxidative damage and induction of antioxidative defense systems	Sofy et al., 2021		Rejected	Duplicate
aco AND gene AND expression AND drought AND stress AND plants AND pgpr	SCOPUS	Integrative hormone and transcriptome analysis underline the role of abscisic acid in seed shattering of weedy rice	Lang et al., 2021		Rejected	Duplicate
aco AND gene AND expression AND drought AND stress AND plants AND pgpr	SCOPUS	Ethylene response of salt stressed rice seedlings following Ethephon and 1-methylcyclopropene seed priming	Hussain et al., 2020		Rejected	Duplicate
aco AND gene AND expression AND drought AND stress AND plants AND pgpr	SCOPUS	Alleviation of salinity stress in wheat by ACC deaminase-producing Bacillus aryabhattai EWR29 with multifarious plant growth-promoting attributes	Farahat et al., 2020		Rejected	Duplicate
aco AND gene AND expression AND drought AND stress AND plants AND pgpr	SCOPUS	ACC deaminase-producing rhizosphere competent Bacillus spp. mitigate salt stress and promote Zea mays growth by modulating ethylene metabolism	Misra-Chauhan, 2020		Rejected	Duplicate
aco AND gene AND expression AND drought AND stress AND plants AND pgpr	SCOPUS	Beneficial plant-bacterial interactions	Glick et al., 2020		Rejected	Duplicate
aco AND gene AND expression AND drought AND stress AND plants AND pgpr	SCOPUS	Microbes in cahoots with plants: MIST to hit the jackpot of agricultural productivity during drought	Kaushal, 2019		Rejected	Duplicate
aco AND gene AND expression AND drought AND stress AND plants AND pgpr	SCOPUS	Mechanisms of the IAA and ACC-deaminase producing strain of Trichoderma longibrachiatum T6 in enhancing wheat seedling tolerance to NaCl stress	Zhang et al., 2019		Rejected	Duplicate
aco AND gene AND expression AND drought AND stress AND plants AND pgpr	SCOPUS	Southern blight disease of tomato control by 1-aminocyclopropane-1-carboxylate (ACC) deaminase producing Paenibacillus lentimorbus B-30488	Dixit et al., 2015		Rejected	Duplicate
aco AND gene AND expression AND drought AND stress AND plants AND pgpr	SCOPUS	Pseudomonas putida attunes morphophysiological, biochemical and molecular responses in Cicer arietinum L. during drought stress and recovery	Tiwari et al., 2016		Rejected	Duplicate
