# Supplementary material for: Meta-analysis of plant growth-promoting rhizobacteria interaction with host plants: implications for drought stress response gene expression
Source: Front Plant Sci. 2024 Jan 15;14:1282553. doi: 10.3389/fpls.2023.1282553 (PMC10823023; doi:10.3389/fpls.2023.1282553)
Supplement: Supplementary file 23 [file Table_8.xlsx]

## Sheet: Foglio1
Keywords	Source	Title	Author	Abstract	Accepted/Rejected	Reason
WRKY' + 'gene express'+ 'drought stress' + ' plants'+ 'PGPR'	Google Scholar	Heterologous WRKY and NAC transcription factors triggered resistance in Nicotiana benthamiana	Abbas et al., 2020	Background: SA (Salicylic acid) and JA (Jasmonic acid)/ET (Ethylene) are the defense and growth hormone regulators involved in alleviating the biotic and abiotic stresses. WRKY and NAC genes are contributors to plant resistance due to their active role in SA and JA/ET defense mechanism. Methods: WRKY and NAC transcription factors (ptHR293 and ptHR759, respectively) were serially selected (by perf…	Rejected	No PGPR
WRKY' + 'gene express'+ 'drought stress' + ' plants'+ 'PGPR'	Google Scholar	Streptomyces alleviate drought stress in tomato plants and modulate the expression of transcription factors ERF1 and WRKY70 genes	Abbasi et al., 2020	Application of PGPRs that are tolerant to abiotic stresses is a promising approach to reduce the negative effects of drought stress and increase crop production. This study was designed to select and evaluate stress-tolerance PGP Streptomyces strains based on in vitro and in vivo experiments. Our results showed that only a small percentage (14 %) of 107 Streptomyces can produce ACCD. The effect o…	Accepted
WRKY' + 'gene express'+ 'drought stress' + ' plants'+ 'PGPR'	Google Scholar	Role of DREB transcription factors in abiotic and biotic stress tolerance in plant	Agarwal et al., 2006	Abiotic and biotic stresses negatively influence survival, biomass production and crop yield. Being multi- genic as well as a quantitative trait, it is a challenge to understand the molecular basis of abiotic stress tolerance and to manipulate it as compared to biotic stresses. Lately, some transcription factor(s) that regulate the expression of several genes related to stress have been discovere…	Rejected	Review
WRKY' + 'gene express'+ 'drought stress' + ' plants'+ 'PGPR'	Google Scholar	Molecular and physiological analysis of drought stress responses in Zea mays treated with plant growth promoting rhizobacteria	Ahmad et al., 2019	Our research intended to appraise the performance of two different Pseudomonas strains on Zea mays L. (cv. B73) under drought stress and non-stress conditions. Plants were inoculated with P. putida KT2440 (Pp) and P. fluorescens (Pf1) followed by sampling at 0, 3rd, and 6th day after imposition of drought stress (DAS). Both strains demonstrated significant improvement in root length, protein cont…	Accepted
WRKY' + 'gene express'+ 'drought stress' + ' plants'+ 'PGPR'	Google Scholar	Overexpression of differentially expressed AhCytb6 gene during plant‐microbe interaction improves tolerance to N2 deficit and salt stress in transgenic tobacco	Alexander et al., 2021	Stenotrophomonas maltophilia has plant growth‐promoting potential, and interaction with Arachis hypogaea changes host‐plant physiology, biochemistry, and metabolomics, which provides tolerance under the N2 starvation conditions. About 226 suppression subtractive hybridization clones were obtained from plant‐microbe interaction, of which, about 62% of gene sequences were uncharacterized, whereas 2…	Rejected	No drought stress
WRKY' + 'gene express'+ 'drought stress' + ' plants'+ 'PGPR'	Google Scholar	Introgression of a novel gene AhBINR differentially expressed during PGPR Brachybacterium saurashtrense-Arachis hypogaea interaction enhances plant performance under nitrogen starvation and salt stress in tobacco	Alexander et al., 2022	Plant growth-promoting rhizobacteria provide endurance during environmental stress conditions. Previously, we have shown that the interaction of the halotolerant diazotrophic bacteria Brachybacterium saurashtrense JG06 induces physio-biochemical and molecular changes in Arachis hypogaea under nitrogen starvation conditions. Here we deciphered the role of a novel gene AhBINR that was differentiall…	Rejected	No WRKY
WRKY' + 'gene express'+ 'drought stress' + ' plants'+ 'PGPR'	Google Scholar	Recent methods of drought stress tolerance in plants	Ali et al., 2017	In the climate change scenario the drought has been diagnosed as major stress affecting crop productivity. This review demonstrates some recent findings on the amelioration of drought stress. Nanoparticles, synthetic growth regulators viz. Trinexapaethyl, and Biochar addition helps to economize the water budget of plants, enhances the bioavailability of water and nutrients as well as overcomes dr…	Rejected	Review
WRKY' + 'gene express'+ 'drought stress' + ' plants'+ 'PGPR'	Google Scholar	Plant Growth-Promoting Bacteria: Biological Tools for the Mitigation of Salinity Stress in Plants	Arora et al., 2020	Salinity stress is one of the major abiotic stresses threatening sustainable crop production worldwide. The extent of salinity affected area is expected to cover about 50% of total agricultural land by 2050. Salinity stress produces various detrimental effects on plants’ physiological, biochemical, and molecular features and reduces productivity. The poor plant growth under salinity stress is due…	Rejected	Review
WRKY' + 'gene express'+ 'drought stress' + ' plants'+ 'PGPR'	Google Scholar	Halo-tolerant plant growth promoting rhizobacteria for improving productivity and remediation of saline soils	Arora et al., 2020	Background: The collective impact of climate change and soil salinity is continuously increasing the degraded lands across the globe, bringing agricultural productivity and food security under stress. The high concentration of salts in saline soils impose osmotic, ionic, oxidative and water stress in plants. Biological solutions can be the most reliable and sustainable approach to ensure food sec…	Rejected	Review
WRKY' + 'gene express'+ 'drought stress' + ' plants'+ 'PGPR'	Google Scholar	Comparative expression analysis and characterization of the ethylene response factor in Cajanus cajan under the influence of Fusarium udum, NaCl and Pseudomonas fluorescens OKC	Bajpai et al., 2021	We evaluated expression pattern of 34 pathogen stress-responsive pigeonpea CcERF genes (out of total 148 CcERF genes) under the combined stress of Fusarium udum WSP-V2 and NaCl in two pigeonpea cultivars, Asha (F. udum resistant) and Bahar (F. udum susceptible) in presence or absence of a plant growth-promoting rhizo- bacteria (PGPR) Pseudomonas fluorescens OKC. Expression analysis of the 34 CcER…	Rejected	No WRKY
WRKY' + 'gene express'+ 'drought stress' + ' plants'+ 'PGPR'	Google Scholar	Plant growth promoting rhizobacteria Dietzia natronolimnaea modulates the expression of stress responsive genes providing protection of wheat from salinity stress	Bharti et al., 2016	Plant growth promoting rhizobacteria (PGPR) hold promising future for sustainable agriculture. Here, we demonstrate a carotenoid producing halotolerant PGPR Dietzia natronolimnaea STR1 protecting wheat plants from salt stress by modulating the transcriptional machinery responsible for salinity tolerance in plants. The expression studies confirmed the involvement of ABA-signalling cascade, as TaAB…	Rejected	No drought stress
WRKY' + 'gene express'+ 'drought stress' + ' plants'+ 'PGPR'	Google Scholar	Synergistic association of endophytic fungi enhances Glycine max L. resilience to combined abiotic stresses: Heavy metals, high temperature and drought stress	Bilal et al., 2020	Recently, the use of endophytic fungi for promoting growth and alleviating abiotic stress has gained considerable attention. However, the association of compatible endophytic fungi with crop plants under simultaneous effects of abiotic stresses is less explored. The current study elucidated the interactive effects of hormone (gibberellins and indole-3-acetic acid)-producing and combined multi-abi…	Rejected	Fungi
WRKY' + 'gene express'+ 'drought stress' + ' plants'+ 'PGPR'	Google Scholar	Trichoderma-Plant Root Colonization: Escaping Early Plant Defense Responses and Activation of the Antioxidant Machinery for Saline Stress Tolerance	Brotman et al., 2012	Trichoderma spp. are versatile opportunistic plant symbionts which can colonize the apoplast of plant roots. Microarrays analysis of Arabidopsis thaliana roots inoculated with Trichoderma asperelloides T203, coupled with qPCR analysis of 137 stress responsive genes and transcription factors, revealed wide gene transcript reprogramming, proceeded by a transient repression of the plant immune respo…	Rejected	Fungi
WRKY' + 'gene express'+ 'drought stress' + ' plants'+ 'PGPR'	Google Scholar	Advances in Wheat Physiology in Response to Drought and the Role of Plant Growth Promoting Rhizobacteria to Trigger Drought Tolerance	Camaille et al., 2021	In the coming century, climate change and the increasing human population are likely lead- ing agriculture to face multiple challenges. Agricultural production has to increase while preserving natural resources and protecting the environment. Drought is one of the major abiotic problems, which limits the growth and productivity of crops and impacts 1–3% of all land.To cope with unfavor- able wate…	Rejected	Review
WRKY' + 'gene express'+ 'drought stress' + ' plants'+ 'PGPR'	Google Scholar	Bio-priming of seeds: Plant stress management and its underlying cellular, biochemical and molecular mechanisms	Chakraborti et al., 2022	Exposure of crops to stress is the most significant barrier to agricultural output and food security worldwide. Stress induces changes in plants’ physiological functions, which leads to lower plant growth and agricultural yield. Plants undergo a variety of molecular, cellular, and physiological changes to combat various abiotic stresses. Plants suffer from increased osmotic pressure outside the r…	Rejected	Review
WRKY' + 'gene express'+ 'drought stress' + ' plants'+ 'PGPR'	Google Scholar	Plant Growth-Promoting Rhizobacteria as a Green Alternative for Sustainable Agriculture	Chandran et al., 2021	Environmental stress is a major challenge for sustainable food production as it reduces yield by generating reactive oxygen species (ROS) which pose a threat to cell organelles and biomolecules such as proteins, DNA, enzymes, and others, leading to apoptosis. Plant growth-promoting rhizobac- teria (PGPR) offers an eco-friendly and green alternative to synthetic agrochemicals and conventional agri…	Rejected	Review
WRKY' + 'gene express'+ 'drought stress' + ' plants'+ 'PGPR'	Google Scholar	Targeting transcription factors for plant disease resistance: shifting paradigm	Chattopadhyay et al., 2019	Transcription factors (TFs) are regulatory proteins that have the ability to alter targeted gene expression either solely by themselves or as a part of the protein complex. Many such TFs have significant regulatory role in plant defence. Being master switches for gene regulation, they become the unique candidates for targeting functional hub and dynamic networks and nodes of different defence sig…	Rejected	Review
WRKY' + 'gene express'+ 'drought stress' + ' plants'+ 'PGPR'	Google Scholar	Cloning and expression patterns of VQ-motif-containing proteins under abiotic stress in tea plant	Chen et al., 2019	VQ-motif-containing (VQ) proteins, featuring a conserved FxxxVQxxTG sequence, are a class of plant proteins that respond to diverse developmental processes. However, the VQ proteins in tea plant remain largely unknown. Here, we have cloned 15 VQ genes from Camellia sinensis that were identified from transcriptome data of the different tissues in tea cultivar ‘Longjing 43’, and five VQ proteins sh…	Rejected	No WRKY
WRKY' + 'gene express'+ 'drought stress' + ' plants'+ 'PGPR'	Google Scholar	Molecular aspects of defence priming	Conrath et al., 2011	Plants can be primed for more rapid and robust activation of defence to biotic or abiotic stress. Priming follows perception of molecular patterns of microbes or plants, recognition of pathogen-derived effectors or colonisation by beneficial microbes. However the process can also be induced by treatment with some natural or synthetic compounds and wounding. The primed mobilization of defence is o…	Rejected	Review
WRKY' + 'gene express'+ 'drought stress' + ' plants'+ 'PGPR'	Google Scholar	VuWRKY, a group I WRKY gene from Vaccinium uliginosum, confers tolerance to cold and salt stresses in plant	Dai et al., 2021	Members of WRKY transcription factors are involved in the response of plant to stress. Vaccinium uliginosum distributed in Greater Khingan Mountains and Lesser Khingan Mountains possesses a high resistance to cold. In this study, a WRKY gene designated as VuWRKY was identified from V. uliginosum, and the expression pattern was also analyzed. The role of VuWRKY plays in abiotic stress was studied …	Rejected	No PGPR
WRKY' + 'gene express'+ 'drought stress' + ' plants'+ 'PGPR'	Google Scholar	Paenibacillus lentimorbus Enhanced Abiotic Stress Tolerance Through Lateral Root Formation and Phytohormone Regulation	Dixit et al., 2022	Under the stressed conditions plant growth-promoting rhizobacteria (PGPR) are able to stimulate plant growth through several mechanisms, including antioxidants alleviation, regulation of stress responsive genes and phytohormones etc. Pre- sent study is conducted to investigate the impact of Paenibacillus lentimorbus B-30488 inoculation on salinity and drought stress mitigation in Arabidopsis thal…	Accepted
WRKY' + 'gene express'+ 'drought stress' + ' plants'+ 'PGPR'	Google Scholar	Bacillus firmus (SW5) augments salt tolerance in soybean (Glycine max L.) by modulating root system architecture, antioxidant defense systems and stress- responsive genes expression	El-Esawi et al., 2018	Soil salinity is an adverse abiotic factor which reduces plant growth, yield and quality. Plant growth-promoting rhizobacteria (PGPR) have a great potential to enhance growth and alleviate saline stress effects without harming the environment via regulating physiological and molecular processes in plants. This study aimed at investigating Bacillus firmus SW5 effects on the performance of soybean …	Rejected	No drought stress
WRKY' + 'gene express'+ 'drought stress' + ' plants'+ 'PGPR'	Google Scholar	Mutation of ZmWRKY86 confers enhanced salt stress tolerance in maize	Fang et al., 2021	As one of the largest families of transcription factors in plants, the WRKY proteins play crucial roles in plant growth and development, defense regulation and stress responses. In this research, ZmWRKY86 encoding a WRKY transcription factor was cloned from maize (Zea mays L.). ZmWRKY86 expression was up-regulated by salt stress. ZmWRKY86 is a nuclear protein and has no transcriptional activation…	Rejected	No PGPR
WRKY' + 'gene express'+ 'drought stress' + ' plants'+ 'PGPR'	Google Scholar	Banana (Musa acuminata) transcriptome profiling in response to rhizobacteria: Bacillus amyloliquefaciens Bs006 and Pseudomonas fluorescens Ps006	Gamez et al., 2019	Background: Banana is one of the most important crops in tropical and sub-tropical regions. To meet the demands of international markets, banana plantations require high amounts of chemical fertilizers which translate into high farming costs and are hazardous to the environment when used excessively. Beneficial free-living soil bacteria that colonize the rhizosphere are known as plant growth-prom…	Rejected	No abiotic stress
WRKY' + 'gene express'+ 'drought stress' + ' plants'+ 'PGPR'	Google Scholar	Rhizospheric Microbial Diversity: An Important Component for Abiotic Stress Management in Crop Plants Toward Sustainable Agriculture	Goyal et al., 2019		Rejected	Chapter book
WRKY' + 'gene express'+ 'drought stress' + ' plants'+ 'PGPR'	Google Scholar	Plant growthepromoting rhizobacteria and their functional role in salinity stress management	Gupta et al., 2020		Rejected	Chapter book
WRKY' + 'gene express'+ 'drought stress' + ' plants'+ 'PGPR'	Google Scholar	Roles of Plant Growth-Promoting Rhizobacteria (PGPR) in Stimulating Salinity Stress Defense in Plants: A Review	Ha-Tran et al., 2021	Abstract: To date, soil salinity becomes a huge obstacle for food production worldwide since salt stress is one of the major factors limiting agricultural productivity. It is estimated that a significant loss of crops (20–50%) would be due to drought and salinity. To embark upon this harsh situation, numerous strategies such as plant breeding, plant genetic engineering, and a large variety of agr…	Rejected	Review
WRKY' + 'gene express'+ 'drought stress' + ' plants'+ 'PGPR'	Google Scholar	Transcription Factors Interact with ABA through Gene Expression and Signaling Pathways to Mitigate Drought and Salinity Stress	Hussain et al., 2021	Among abiotic stressors, drought and salinity seriously affect crop growth worldwide. In plants, research has aimed to increase stress-responsive protein synthesis upstream or downstream of the various transcription factors (TFs) that alleviate drought and salinity stress. TFs play diverse roles in controlling gene expression in plants, which is necessary to regulate biological processes, such as…	Rejected	Review
WRKY' + 'gene express'+ 'drought stress' + ' plants'+ 'PGPR'	Google Scholar	Enhancement of growth and salt tolerance of rice seedlings (Oryza sativa L.) by regulating ethylene production with a novel halotolerant PGPR strain Glutamicibacter sp. YD01 containing ACC deaminase activity	Ji et al., 2020	Plant growth-promoting rhizobacteria can stimulate not only plant growth and development, but also alleviate the negative effects on plants caused by abiotic stresses. In this study, a novel halotolerant strain was isolated and identified as Glutamici- bacter sp. (YD01) using 16S rDNA analysis. This strain tolerated up to 10% NaCl and showed two growth-promoting traits such as 1-aminocyclopropane…	Rejected	No drought stress
WRKY' + 'gene express'+ 'drought stress' + ' plants'+ 'PGPR'	Google Scholar	Plant-growth-promoting rhizobacteria: drought stress alleviators to ameliorate crop production in drylands	Kaushal et al., 2016	Drylands are known for being a drought stressed environment, which is an alarming constraint to crop produc- tivity. To rescue plant growth in such stressful conditions, plant-growth-promoting rhizobacteria (PGPR) are a bulwark against drought stress and imperilled sustainability of agricul- ture in drylands. PGPR mitigates the impact of drought stress on plants through a process called rhizobact…	Rejected	Review
WRKY' + 'gene express'+ 'drought stress' + ' plants'+ 'PGPR'	Google Scholar	Biocontrol Potential of Bacillus amyloliquefaciens against Botrytis pelargonii and Alternaria alternata on Capsicum annuum	Kazerooni et al., 2021	The aim of this study was to assess the ability of Bacillus amyloliquefaciens, to augment plant growth and suppress gray mold and leaf spot in pepper plants. Morphological modifications in fungal pathogen hyphae that expanded toward the PGPR colonies were detected via scanning electron microscope. Furthermore, preliminary screening showed that PGPR could produce various hydrolytic enzymes in its …	Rejected	Biotic stress
WRKY' + 'gene express'+ 'drought stress' + ' plants'+ 'PGPR'	Google Scholar	Rhizospheric Bacillus amyloliquefaciens Protects Capsicum annuum cv. Geumsugangsan From Multiple Abiotic Stresses via Multifarious Plant Growth-Promoting Attributes	Kazerooni et al., 2021	Plant growth-promoting rhizobacteria (PGPR) are beneficial microorganisms that can be utilized to improve plant responses against biotic and abiotic stresses. In this study, we investigated whether PGPR (Bacillus amyloliquefaciens) isolated from the endorhizosphere of Sasamorpha borealis have the potential to sustain pepper growth under drought, salinity, and heavy metal stresses. The bacterial s…	Accepted
WRKY' + 'gene express'+ 'drought stress' + ' plants'+ 'PGPR'	Google Scholar	Crosstalk amongst phytohormones from planta and PGPR under biotic and abiotic stresses	Khan et al., 2020	Phytohormones are endogenously produced organic substances indispensable for regulating plant growth and yield and also play major role in inducing tolerance to plants against various biotic and abiotic stresses. The convergence points among hormone signal transduction cascades are considered as cross-talk which are crucial for plant development as well as for plant responses to biotic and abioti…	Rejected	Review
WRKY' + 'gene express'+ 'drought stress' + ' plants'+ 'PGPR'	Google Scholar	Identification, characterization and expression profiles of Fusarium udum stress-responsive WRKY transcription factors in Cajanus cajan under the influence of NaCl stress and Pseudomonas fluorescens oKc	Kumar et al., 2019	The WRKY gene family has never been identified in pigeonpea (Cajanus cajan). Therefore, objective of the present study was to identify the WRKY gene family in pigeonpea and characterize the Fusarium udum stress-responsive WRKY genes under normal, NaCl-stressed and Pseudomonas fluorescens OKC (a plant growth-promoting bacterial strain) treated conditions. The aim was to characterize the Fusarium u…	Rejected	No drought stress
WRKY' + 'gene express'+ 'drought stress' + ' plants'+ 'PGPR'	Google Scholar	Identification of drought responsive Elaeis guineensis WRKY transcription factors with sensitivity to other abiotic stresses and hormone treatments	Lee et al., 2022	Background: The ability of plants to withstand and thrive in an adverse environment is crucial to ensure their surviv‐ ability and yield performance. The WRKY transcription factors (TFs) have crucial roles in plant growth, development and stress response, particularly drought stress. In oil palm, drought is recognized as one of the major yield limiting factors. However, the roles of WRKY TFs in t…	Rejected	No PGPR
WRKY' + 'gene express'+ 'drought stress' + ' plants'+ 'PGPR'	Google Scholar	Global Gene Expression Analysis Reveals Crosstalk between Response Mechanisms to Cold and Drought Stresses in Cassava Seedlings	Li et al., 2017	Abiotic stress negatively impacts cassava (Manihot esculenta) growth and yield. Several molecular mechanisms of plant response to cold and drought have been identified and described in the literature, however, little is known about the crosstalk of the responses of cassava to these two stresses. To elucidate this question, transcriptome analysis of cassava seedlings under cold or PEG-simulated dr…	Rejected	No PGPR
WRKY' + 'gene express'+ 'drought stress' + ' plants'+ 'PGPR'	Google Scholar	A novel PGPR strain Kocuria rhizophila Y1 enhances salt stress tolerance in maize by regulating phytohormone levels, nutrient acquisition, redox potential, ion homeostasis, photosynthetic capacity and stress-responsive genes expression	Li et al., 2020	High salinity is harmful for crop physiology and yield. Accumulating evidences indicate that plant growth promoting rhizobacteria (PGPR) can enhance crop growth and reduce the negative impacts of salt stress through regulation of some molecular, biochemical and physiological features. In the present study, a novel halo-tolerant strain Y1 was isolated from maize rhizosphere soil. Sequence analysis…	Rejected	No drought stress
WRKY' + 'gene express'+ 'drought stress' + ' plants'+ 'PGPR'	Google Scholar	Transcriptome profiling of genes involved in induced systemic salt tolerance conferred by Bacillus amyloliquefaciens FZB42 in Arabidopsis thaliana	Liu et al., 2016	Plant growth-promoting Bacillus amyloliquefaciens FZB42 induces systemic salt tolerance in Arabidopsis and enhances the fresh and dry weight. However, the underlying molecular mechanism that allows plants to respond to FZB42 and exhibit salt tolerance is largely unknown. Therefore, we performed large-scale transcriptome sequencing of Arabidopsis shoot tissues grown under salt stress with or witho…	Rejected	No drought stress
WRKY' + 'gene express'+ 'drought stress' + ' plants'+ 'PGPR'	Google Scholar	Transcriptome Profiles Reveal the Growth-Promoting Mechanisms of Paenibacillus polymyxa YC0136 on Tobacco (Nicotiana tabacum L.)	Liu et al., 2020	Paenibacillus polymyxa is an important member of the plant growth-promoting rhizobacteria. P. polymyxa YC0136 inoculation had beneficial effect on growth promotion and biological control of tobacco (Nicotiana tabacum L.) under field conditions. This study aimed to reveal the growth-promoting mechanisms of strain YC0136. In growth- promotion assays, tobacco plant height was increased by 8.42% and …	Rejected	No abiotic stress
WRKY' + 'gene express'+ 'drought stress' + ' plants'+ 'PGPR'	Google Scholar	Molecular control to salt tolerance mechanisms of woody plants: recent achievements and perspectives	Llanes et al., 2021	Woody plants have salt-tolerant mechanisms similar to those developed by non-woody plants. Among others, compartmentalization of ions, production of compatible solutes, synthesis of specific proteins and metabo- lites, and induction of transcriptional factors are the most relevant. Woody plant-associated microbial interactions as well as naturally stress-adapted trees are resources that deserve t…	Rejected	Review
WRKY' + 'gene express'+ 'drought stress' + ' plants'+ 'PGPR'	Google Scholar	Comparative Transcriptomics and Metabolomics Reveal an Intricate Priming Mechanism Involved in PGPR-Mediated Salt Tolerance in Tomato.	Mellidou et al., 2021	Plant-associated beneficial strains inhabiting plants grown under harsh ecosystems can help them cope with abiotic stress factors by positively influencing plant physiology, development, and environmental adaptation. Previously, we isolated a potential plant growth promoting strain (AXSa06) identified as Pseudomonas oryzihabitans, possessing 1-aminocyclopropane-1-carboxylate deaminase activity, p…	Accepted
WRKY' + 'gene express'+ 'drought stress' + ' plants'+ 'PGPR'	Google Scholar	Plant Growth-Promoting Microbes for Sustainable Biotic and Abiotic Stress Management	Monteiro et al., 2021		Rejected	Book
WRKY' + 'gene express'+ 'drought stress' + ' plants'+ 'PGPR'	Google Scholar	Transcriptomic response of Arabidopsis thaliana after 24 h incubation with the biocontrol fungus Trichoderma harzianum	Morán-Diez et al., 2012	Trichoderma harzianum is a fungus used as biocontrol agent using its antagonistic abilities against phy- topathogenic fungi, although it has also direct effects on plants, increasing or accelerating their growth and resistance to diseases and the tolerance to abiotic stresses. We analyzed Arabidopsis thaliana gene expression changes after 24 h of incubation in the presence of T. harzianum T34 usi…	Rejected	Fungi
WRKY' + 'gene express'+ 'drought stress' + ' plants'+ 'PGPR'	Google Scholar	Beneficial features of plant growth-promoting rhizobacteria for improving plant growth and health in challenging conditions: A methodical review	Oleńska et al.., 2020	New eco-friendly approaches are required to improve plant biomass production. Beneficial plant growth- promoting (PGP) bacteria may be exploited as excellent and efficient biotechnological tools to improve plant growth in various – including stressful – environments. We present an overview of bacterial mechanisms which contribute to plant health, growth, and development. Plant growth promoting rh…	Rejected	Review
WRKY' + 'gene express'+ 'drought stress' + ' plants'+ 'PGPR'	Google Scholar	Jasmonic acid: a key frontier in conferring abiotic stress tolerance in plants	Raza et al., 2021	Abiotic stresses are the primary sources of crop losses globally. The identification of key mechanisms deployed and estab- lished by plants in response to abiotic stresses is necessary for the maintenance of their growth and persistence. Recent discoveries have revealed that phytohormones or plant growth regulators (PGRs), mainly jasmonic acid (JA), have increased our knowledge of hormonal signal…	Rejected	Review
WRKY' + 'gene express'+ 'drought stress' + ' plants'+ 'PGPR'	Google Scholar	Defining plant growth promoting rhizobacteria molecular and biochemical networks in beneficial plant-microbe interactions	Rosier et al., 2018	Background Our knowledge of plant beneficial bac- teria in the rhizosphere is rapidly expanding due to intense interest in utilizing these types of microbes in agriculture. Laboratory and field studies consistently document the growth, health and protective benefits conferred to plants by applying plant growth promoting rhizobacteria (PGPR). PGPR exert their influence on other species, including …	Rejected	Review
WRKY' + 'gene express'+ 'drought stress' + ' plants'+ 'PGPR'	Google Scholar	Comparative analysis of BABA and Piriformospora indica mediated priming of defence-related genes in tomato against early blight	Roylawar et al., 2015	Pre-treatment with BABA or pre-colonization of roots with Piriformospora indica resulted in decreased disease severity in tomato caused by early blight. BABA was found to be more efficient in inhibiting the area of necrotic lesions. Expression profiles of SlWRKY1, SlWRKY11, SlWRKY39, SlWRKY53, SlWRKY70, PR1b, PR2 GLA, PR3 ACHI, PR3 BCHI, PR7, PDF1.2 and NPR1 genes were compared during BABA- and P…	Rejected	Biotic stress
WRKY' + 'gene express'+ 'drought stress' + ' plants'+ 'PGPR'	Google Scholar	transcriptional responses of wheat roots inoculated with Arthrobacter nitroguajacolicus to salt stress	Safdarian et al., 2018	It is commonly accepted that bacteria actively interact with plant host and have beneficial effects on growth and adaptation and grant tolerance to various biotic and abiotic stresses. However, the mechanisms of plant growth promoting bacteria to communicate and adapt to the plant environment are not well characterized. Among the examined bacteria isolates from different saline soils, Arthrobacte…	rejected	No drought stress
WRKY' + 'gene express'+ 'drought stress' + ' plants'+ 'PGPR'	Google Scholar	Klebsiella sp. confers enhanced tolerance to salinity and plant growth promotion in oat seedlings (Avena sativa)	Sapre et al., 2018	Plant growth and yield is adversely affected by soil salinity. Salt tolerant plant growth-promoting rhizobacteria (PGPR) strain IG 3 was isolated from rhizosphere of wheat plants. The isolate IG 3 was able to grow in presence of NaCl ranging from 0 to 20% in Luria Bertani medium. The present study was planned to evaluate the role of inoculation of PGPR strain IG 3 and its efficacy in augmenting s…	Rejected	No drought stress
WRKY' + 'gene express'+ 'drought stress' + ' plants'+ 'PGPR'	Google Scholar	Gene expression profiling of tomato roots interacting with Pseudomonas fluorescens unravels the molecular reprogramming that occurs during the early phases of colonization	Scotti et al., 2019	The concerns of people over the wide use of chemicals are determining an increasing attention to more eco-friendly management practices in agriculture. Plant growth promoting rhizobacteria (PGPR) are emerging as important beneficial microbial inoculants because of their capability to promote plant growth and improve plant protection. We performed RNASeq to analyze gene expression profiling at 24,…	Rejected	No abiotic stress
WRKY' + 'gene express'+ 'drought stress' + ' plants'+ 'PGPR'	Google Scholar	Transcriptome analysis and differential gene expression profiling of two contrasting quinoa genotypes in response to salt stress	Shi et al., 2020	Background: Soil salinity is one of the major abiotic stress factors that affect crop growth and yield, which seriously restricts the sustainable development of agriculture. Quinoa is considered as one of the most promising crops in the future for its high nutrition value and strong adaptability to extreme weather and soil conditions. However, the molecular mechanisms underlying the adaptive resp…	Rejected	No PGPR
WRKY' + 'gene express'+ 'drought stress' + ' plants'+ 'PGPR'	Google Scholar	A multifaceted rhizobacterium Bacillus licheniformis functions as a fungal antagonist and a promoter of plant growth and abiotic stress tolerance	Sukkasem et al., 2018	Plant-growth-promoting rhizobacteria play a beneficial role in plant growth through various mechanisms. In this study, an isolated rhizobacterial strain, Bacillus licheniformis CH102 (hereafter CH102), exhibited antifungal activity and harbored genes required for lantibiotic and 2,3-butanediol production. In Arabidopsis, increased root hair number and fresh weight were obtained in the CH102-inocu…	Accepted
WRKY' + 'gene express'+ 'drought stress' + ' plants'+ 'PGPR'	Google Scholar	Genome-wide identification and expression analysis of Arabidopsis GRAM-domain containing gene family in response to abiotic stresses and PGPR treatment	Tiwari et al., 2021	Characterization of stress-responsive genes is important to understand the genomics perspective of stress toler- ance. In this purview, several gene-families are being identified and characterized in the model and non-model plant species, which has greatly enhanced the knowledge of molecular intricacies associated with stress toler- ance. One such gene family is the GRAM-domain containing which h…	Accepted
WRKY' + 'gene express'+ 'drought stress' + ' plants'+ 'PGPR'	Google Scholar	Induction of in planta resistance by flagellin (Flg) and elongation factor-TU (EF-Tu) of Bacillus amyloliquefaciens (VB7) against groundnut bud necrosis virus in tomato	Vanthana et al., 2019	Role of plant growth promoting rhizobacteria (PGPR) in growth promotion and induction of resistance against various plant pathogens have been extensively studied. However, MAMP (Microbe Associated Molecular Pattern) triggered immunity (MTI) against plant viruses are not well exploited. The present study enlightens the role of two MAMP genes including, flagellin (Flg) and elongation factor (EF-Tu)…	Rejected	Biotic stress
WRKY' + 'gene express'+ 'drought stress' + ' plants'+ 'PGPR'	Google Scholar	Digital gene expression profiling of the pathogen-resistance mechanism of Oryza sativa 9311 in response to Bacillus amyloliquefaciens FZB42 induction	Xie et al., 2017	Plant growth-promoting rhizobacteria (PGPR) are beneficial soil microorganisms that colonize plant roots for nutritional purposes and benefit plants by increasing plant growth or reducing plant disease. To clarify the complex mechanisms underlying plant-PGPR interactions, transcriptomic analyses of the response of rice (Oryza sativa) 9311 to Bacillus amyloliquefaciens FZB42 were carried out using…	Rejected	Biotic stress
WRKY' + 'gene express'+ 'drought stress' + ' plants'+ 'PGPR'	Google Scholar	A WRKY transcription factor WRKY184 from Brassica napus L. is involved in flowering and secondary wall development in transgenic Arabidopsis thaliana	Yang et al., 2020	Flowering is one of the important developmental processes, and the timing of flowering can affect seed yield. Lignin is one of the main components of plant cell walls. Lack of lignin in crops will reduce its resistance to stress, which in turn threatens the production of crops. The WRKY transcription factor family is a large family in higher plants and is widely involved in various biological pro…	Rejected	No PGPR
WRKY' + 'gene express'+ 'drought stress' + ' plants'+ 'PGPR'	Google Scholar	MODULATION OF BARLEY (Hordeum vulgare) DEFENSE AND HORMONAL PATHWAYS BY PSEUDOMONAS SPECIES ACCOUNTED FOR SALINITY TOLERANCE	Zaib et al., 2020	In the present study, we investigated two Pseudomonas species strains (P. fluorescens SBW25 and P. putida KT2440) for their use in plant tolerance under salt stressed condition. Barley (Hordeum vulgare L.) plants inoculated with PGPR strains were subjected to 200mM salinity stress and were analyzed in comparison to non-treated stressed plants based on height, leaf area and fresh and dry weights o…	Rejected	No drought stress
WRKY' + 'gene express'+ 'drought stress' + ' plants'+ 'PGPR'	Google Scholar	Every cloud has a silver lining: how abiotic stresses affect gene expression in plant-pathogen interactions	Zarattini et al., 2020	Current environmental and climate changes are having a pronounced influence on the outcome of plant–pathogen interactions, further highlighting the fact that abiotic stresses strongly affect biotic interactions at various levels. For instance, physiological parameters such as plant architecture and tissue organization together with primary and specialized metabolism are affected by environmental …	Rejected	Review
WRKY' + 'gene express'+ 'drought stress' + ' plants'+ 'PGPR'	Google Scholar	TaWRKY40 transcription factor positively regulate the expression of TaGAPC1 to enhance drought tolerance	Zhang et al., 2019	Backgrounds: Drought stress is one of the major factors that affects wheat yield. Glyceraldehyde-3-Phosphate dehydrogenase (GAPDH) is a multifunctional enzyme that plays the important role in abiotic stress and plant development. However, in wheat, limited information about drought-responsive GAPC genes has been reported, and the mechanism underlying the regulation of the GAPC protein is unknown.…	Rejected	No PGPR
WRKY' + 'gene express'+ 'drought stress' + ' plants'+ 'PGPR'	Google Scholar	The intricacy of silicon, plant growth regulators and other signaling molecules for abiotic stress tolerance: An entrancing crosstalk between stress alleviators	Khan et al., 2021	Unfavorable environmental conditions are the critical inimical to the sustainable agriculture. Among various novel strategies designed to protect plants from abiotic stress threats, use of mineral elements as ‘stress miti- gators’ has emerged as the most crucial and interesting aspect. Silicon (Si) is a quasi-essential nutrient that mediates plant growth and development and interacts with plant g…	Rejected	Review
WRKY' + 'gene express'+ 'drought stress' + ' plants'+ 'PGPR'	Google Scholar	Volatile Organic Compounds of Streptomyces sp. TOR3209 Stimulated Tobacco Growth by Up-Regulating the Expression of Genes Related to Plant Growth and Development	He et al., 2022	To investigate the mechanism underlying the plant growth-promoting (PGP) effects of strain Streptomyces sp. TOR3209, PGP traits responsible for indoleacetic acid production, siderophore production, and phosphate solubilization were tested by culturing the strain TOR3209 in the corresponding media. The effects of volatile organic compounds (VOCs) produced by the strain TOR3209 on plant growth were…	Rejected	No PGPR
WRKY' + 'gene express'+ 'drought stress' + ' plants'+ 'PGPR'	Google Scholar	Plant Transcriptome Reprograming and Bacterial Extracellular Metabolites Underlying Tomato Drought Resistance Triggered by a Beneficial Soil Bacteria	Morcillo et al., 2021		Rejected	duplicate
WRKY' + 'gene express'+ 'drought stress' + ' plants'+ 'PGPR'	Google Scholar	Delineation of mechanistic approaches of rhizosphere microorganisms facilitated plant health and resilience under challenging conditions	Dukare et al., 2022	Sustainable agriculture demands the balanced use of inorganic, organic, and microbial biofertilizers for enhanced plant productivity and soil fertility. Plant growth-enhancing rhizospheric bacteria can be an excellent biotechnological tool to augment plant productivity in different agricultural setups. We present an overview of microbial mechanisms which directly or indirectly contribute to plant…	Rejected	Review
WRKY' + 'gene express'+ 'drought stress' + ' plants'+ 'PGPR'	Google Scholar	Delineation of mechanistic approaches of rhizosphere microorganisms facilitated plant health and resilience under challenging conditions	Dukare et al., 2022		Rejected	duplicate
WRKY' + 'gene express'+ 'drought stress' + ' plants'+ 'PGPR'	Google Scholar	Genetic, Epigenetic, Genomic and Microbial Approaches to Enhance Salt Tolerance of Plants: A Comprehensive Review	Saradadevi et al., 2021	Globally, soil salinity, which refers to salt-affected soils, is increasing due to various environmental factors and human activities. Soil salinity poses one of the most serious challenges in the field of agriculture as it significantly reduces the growth and yield of crop plants, both quantitatively and qualitatively. Over the last few decades, several studies have been carried out to understan…	Rejected	Review
WRKY' + 'gene express'+ 'drought stress' + ' plants'+ 'PGPR'	Google Scholar	Plant Biotic Interactions	Kuppusamy et al., 2019		Rejected	Book
WRKY' + 'gene express'+ 'drought stress' + ' plants'+ 'PGPR'	Google Scholar	Transcriptome of silicon-induced resistance against Ralstonia solanacearum in the silicon non-accumulator tomato implicates priming effect	Ghareeb et al., 2011	Silicon induced resistance (SiIR) in tomato against bacterial wilt caused by Ralstonia solanacearum. The mechanism of SiIR is ambiguous. Therefore we tracked the expression of twelve defense marker genes over time using qRT-PCR. Besides up-regulated expression of the jasmonic acid/ethylene marker genes JERF3, TSRF1and ACCO during SiIR, the expression of the oxidative stress markers FD-I and POD a…	Rejected	Biotic stress
WRKY' + 'gene express'+ 'drought stress' + ' plants'+ 'PGPR'	Google Scholar	Plant root transcriptome profiling reveals a strain-dependent response during Azospirillum-rice cooperation	Drogue et al., 2014	Cooperation involving Plant Growth-Promoting Rhizobacteria results in improvements of plant growth and health. While pathogenic and symbiotic interactions are known to induce transcriptional changes for genes related to plant defense and development, little is known about the impact of phytostimulating rhizobacteria on plant gene expression. This study aims at identifying genes significantly regu…	Rejected	No abiotic stress
WRKY' + 'gene express'+ 'drought stress' + ' plants'+ 'PGPR'	Google Scholar	Transcriptome Analysis of Induced Systemic Drought Tolerance Elicited by Pseudomonas chlororaphis O6 in Arabidopsis thaliana	Cho et al., 2013	Root colonization by Pseudomonas chlororaphis O6 induces systemic drought tolerance in Arabidopsis thaliana. Microarray analysis was performed using the 22,800- gene Affymetrix GeneChips to identify differentially- expressed genes from plants colonized with or without P. chlororaphis O6 under drought stressed conditions or normal growth conditions. Root colonization in plants grown under regular …	accepted
WRKY' + 'gene express'+ 'drought stress' + ' plants'+ 'PGPR'	Google Scholar	Plant Transcriptome Reprograming and Bacterial Extracellular Metabolites Underlying Tomato Drought Resistance Triggered by a Beneficial Soil Bacteria	Morcillo et al., 2021		Rejected	duplicate
WRKY' + 'gene express'+ 'drought stress' + ' plants'+ 'PGPR'	Google Scholar	Plant, Soil and Microbes in Tropical Ecosystems	Rashid et al., 2021		Rejected	Book
WRKY' + 'gene express'+ 'drought stress' + ' plants'+ 'PGPR'	Google Scholar	Bacillus halotolerans KKD1 induces physiological, metabolic and molecular reprogramming in wheat under saline condition	Wu et al., 2022	Salt stress decreases plant growth and is a major threat to crop yields worldwide. The present study aimed to alleviate salt stress in plants by inoculation with halophilic plant growth-promoting rhizobacteria (PGPR) isolated from an extreme environment in the Qinghai–Tibetan Plateau. Wheat plants inoculated with Bacillus halotolerans KKD1 showed increased seedling morphological parameters and ph…	Rejected	No WRKY
WRKY' + 'gene express'+ 'drought stress' + ' plants'+ 'PGPR'	Google Scholar	Ectopic Expression of JcWRKY Transcription Factor Confers Salinity Tolerance via Salicylic Acid Signaling	Agarwal et al., 2016	Plants, being sessile, have developed intricate signaling network to specifically respond to the diverse environmental stress. The plant-specific WRKY TFs form one of the largest TF family and are involved in diverse plant processes, involving growth, development and stress signaling through auto and cross regulation with different genes and TFs. Here, we report the functional characterization of…	Rejected	No PGPR
WRKY' + 'gene express'+ 'drought stress' + ' plants'+ 'PGPR'	Google Scholar	RNA-Seq based global transcriptome analysis of rice unravels the key players associated with brown planthopper resistance	Satturu et al., 2021	Rice production is adversely affected by biotic and abiotic stresses. Among the biotic stresses, brown planthopper (BPH) majorly affects the rice yield. Comprehending the genome and candidate players is essential for the resistance to BPH. This holistic study aimed to dissect the complex BPH resistance mechanism of the host against pathogen. Transcriptome analysis of six samples comprising of two…	Rejected	Biotic stress
WRKY' + 'gene express'+ 'drought stress' + ' plants'+ 'PGPR'	Google Scholar	Abiotic Stress in Plants; Stress Perception to Molecular Response and Role of Biotechnological Tools in Stress Resistance	Imran et al., 2021	Plants, due to their sessile nature, face several environmental adversities. Abiotic stresses such as heat, cold, drought, heavy metals, and salinity are serious threats to plant production and yield. To cope with these stresses, plants have developed sophisticated mechanisms to avoid or resist stress conditions. A proper response to abiotic stress depends primarily on how plants perceive the str…	Rejected	Review
WRKY' + 'gene express'+ 'drought stress' + ' plants'+ 'PGPR'	Google Scholar	Recent Duplications Dominate VQ and WRKY Gene Expansions in Six Prunus Species	Zhong et al., 2011	Genes encoding VQ motif-containing (VQ) transcriptional regulators and WRKY transcription factors can participate separately or jointly in plant growth, development, and abiotic and biotic stress responses. In this study, 222 VQ and 645 WRKY genes were identified in six Prunus species. Based on phylogenetic tree topologies, the VQ and WRKY genes were classified into 13 and 32 clades, respectively…	Rejected	No PGPR
WRKY' + 'gene express'+ 'drought stress' + ' plants'+ 'PGPR'	Google Scholar	Transcription factor WRKY14 mediates resistance of tea plants (Camellia sinensis (L.) O. Kuntze) to blister blight	Liu et al., 2021	Blister blight, caused by Exobasidium vexans Massee, is a serious tea disease and leads to massive damage to tea yield and quality. WRKY transcription factors play an important role in the regulation of biotic stresses. However, the biological and molecular functions of these transcription factors during blister blight in tea plants are not known. The present study isolated a disease resistance g…	Rejected	Biotic stress
WRKY' + 'gene express'+ 'drought stress' + ' plants'+ 'PGPR'	Google Scholar	Microbial inoculation in rice regulates antioxidative reactions and defense related genes to mitigate drought stress	Singh et al., 2020	Microbial inoculation in drought challenged rice triggered multipronged steps at enzymatic, non- enzymatic and gene expression level. these multifarious modulations in plants were related to stress tolerance mechanisms. Drought suppressed growth of rice plants but inoculation with Trichoderma, Pseudomonas and their combination minimized the impact of watering regime. induced PAL gene expression a…	Rejected	No WRKY
WRKY' + 'gene express'+ 'drought stress' + ' plants'+ 'PGPR'	Google Scholar	Biochar mediates systemic response of strawberry to foliar fungal pathogens	Harel et al., 2012	Background and Aims Various biochars added to soil have been shown to improve plant performance. Moreover, a wood biochar was found to induce tomato and pepper plant systemic resistance to two foliar fungal pathogens. The aim of this study was to explore the ability of wood biochar and greenhouse waste biochar to induce systemic resistance in strawberry plants against Botrytis cinerea, Colletotri…	Rejected	Biotic stress
WRKY' + 'gene express'+ 'drought stress' + ' plants'+ 'PGPR'	Google Scholar	Bacillus amyloliquefaciens SN16-1-Induced Resistance System of the Tomato against Rhizoctonia solani	Zhao et al., 2022	Tomato (Solanum lycopersicum), as an important economical vegetable, is often infected with Rhizoctonia solani, which results in a substantial reduction in production. Therefore, the molecular mechanism of biocontrol microorganisms assisting tomato to resist pathogens is worth exploring. Here, we use Bacillus amyloliquefaciens SN16-1 as biocontrol bacteria, and employed RNA-Seq technol- ogy to st…	Rejected	Biotic stress
WRKY' + 'gene express'+ 'drought stress' + ' plants'+ 'PGPR'	Google Scholar	Karrikin Improves Osmotic and Salt Stress Tolerance via the Regulation of the Redox Homeostasis in the Oil Plant Sapium sebiferum	Shah et al., 2020	Karrikins are reported to stimulate seed germination, regulate seedling growth, and increase the seedling vigor in abiotic stress conditions in plants. Nevertheless, how karrikins alleviate abiotic stress remains largely elusive. In this study, we found that karrikin (KAR1) could significantly alleviate both drought and salt stress in the important oil plant Sapium sebiferum. KAR1 supplementation…	Rejected	No PGPR
WRKY' + 'gene express'+ 'drought stress' + ' plants'+ 'PGPR'	Google Scholar	Induced Systemic Resistance for Improving Plant Immunity by Beneficial Microbes	Yu et al., 2021	Plant beneficial microorganisms improve the health and growth of the associated plants. Application of beneficial microbes triggers an enhanced resistance state, also termed as induced systemic resistance (ISR), in the host, against a broad range of pathogens. Upon the activation of ISR, plants employ long-distance systemic signaling to provide protection for distal tissue, inducing rapid and str…	Rejected	Review
WRKY' + 'gene express'+ 'drought stress' + ' plants'+ 'PGPR'	Google Scholar	Effective and durable systemic wheat-induced resistance by a plant-growth-promoting rhizobacteria consortium of Paenibacillus sp. strain B2 and Arthrobacter spp. strain AA against Zymoseptoria tritici and drought stress	Samain et al., 2022	For a sustainable environment, plant-growth-promoting rhizobacteria (PGPR) are natural resources considering as one of the most important fungicides’ alternatives inducing resistance to plant diseases. The aim of the present work is to investigate the synergistic promotion effect of a PGPR mixture composed of Paenibacillus sp. strain B2 (PB2) and Arthrobacter spp. strain AA (AA), referred hereaft…	Rejected	Biotic stress
WRKY' + 'gene express'+ 'drought stress' + ' plants'+ 'PGPR'	Google Scholar	Unraveling Microbial Volatile Elicitors Using a Transparent Methodology for Induction of Systemic Resistance and Regulation of Antioxidant Genes at Expression Levels in Chili against Bacterial Wilt Disease	Kashyap et al., 2022	Microbial volatiles benefit the agricultural ecological system by promoting plant growth and systemic resistance against diseases without harming the environment. To explore the plant growth- promoting efficiency of VOCs produced by Pseudomonas fluorescens PDS1 and Bacillus subtilis KA9 in terms of chili plant growth and its biocontrol efficiency against Ralstonia solanacearum, experiments were c…	Rejected	Biotic stress
WRKY' + 'gene express'+ 'drought stress' + ' plants'+ 'PGPR'	Google Scholar	Drought and Heat Stress in Cool-Season Food Legumes in Sub-Tropical Regions: Consequences, Adaptation, and Mitigation Strategies	Kumari et al., 2021	Drought and heat stress are two major abiotic stresses that challenge the sustainability of agriculture to a larger extend. The changing and unpredictable climate further aggravates the efforts made by researchers as well as farmers. The stresses during the terminal stage of cool-season food legumes may affect numerous physiological and biochemical reactions that may result in poor yield. The pla…	Rejected	Review
WRKY' + 'gene express'+ 'drought stress' + ' plants'+ 'PGPR'	Google Scholar	Biotic and Abiotic Stress Tolerance in Plants	Chhapekar et al., 2021		Rejected	Book
WRKY' + 'gene express'+ 'drought stress' + ' plants'+ 'PGPR'	Google Scholar	Transcriptomics of Biostimulation of Plants Under Abiotic Stress	González-Morales et al., 2021	Plant biostimulants are compounds, living microorganisms, or their constituent parts that alter plant development programs. The impact of biostimulants is manifested in several ways: via morphological, physiological, biochemical, epigenomic, proteomic, and transcriptomic changes. For each of these, a response and alteration occur, and these alterations in turn improve metabolic and adaptive perfo…	Rejected	Review
WRKY' + 'gene express'+ 'drought stress' + ' plants'+ 'PGPR'	Google Scholar	Plant Growth‐Promoting Rhizobacteria‐Mediated Adaptive Responses of Plants Under Salinity Stress	Hoque et al., 2022	In this recent era, several approaches have been developed to alleviate the adverse effects of salinity stress in different plants. However, some of them are not eco-friendly. In this context, evolving sustainable approaches which enhance the productiv- ity of saline soil without harming the environment are necessary. Many recent studies showed that plant growth-promoting rhizobacteria (PGPR) are…	Rejected	Review
WRKY' + 'gene express'+ 'drought stress' + ' plants'+ 'PGPR'	Google Scholar	Jasmonic Acid in Plant Abiotic Stress Tolerance and Interaction with Abscisic Acid	Kim et al., 2021	The phytohormone jasmonic acid (JA), a cyclopentane fatty acid, mediates plant responses to abiotic stresses. Abiotic stresses rapidly and dynamically affect JA metabolism and JA responses by upregulating the expression of genes involved in JA biosynthesis and signaling, indicating that JA has a crucial role in plant abiotic stress responses. The crucial role of JA has been demonstrated in many p…	Rejected	Review
WRKY' + 'gene express'+ 'drought stress' + ' plants'+ 'PGPR'	Google Scholar	Root transcriptome analysis of Arabidopsis thaliana exposed to beneficial Bacillus subtilis FB17 rhizobacteria revealed genes for bacterial recruitment and plant defense independent of malate efflux	Lakshmanan et al., 2013	Our previous work has demonstrated that Arabidopsis thaliana can actively recruit beneficial rhizo- bacteria Bacillus subtilis strain FB17 (hereafter FB17) through an unknown shoot-to-root long-distance signaling pathway post a foliar bacterial pathogen attack. However, it is still not well understood which genetic targets FB17 affects in plants. Microarray analysis of A. thaliana roots treated w…	Rejected	No abiotic stress
WRKY' + 'gene express'+ 'drought stress' + ' plants'+ 'PGPR'	Google Scholar	Expression Profile of Sorghum Genes and Cis-Regulatory Elements under Salt-Stress Conditions	Lee et al., 2022	Salinity stress is one of the most important abiotic stresses that causes great losses in crop production worldwide. Identifying the molecular mechanisms of salt resistance in sorghum will help develop salt-tolerant crops with high yields. Sorghum (Sorghum bicolor (L.) Moench) is one of the world’s four major grains and is known as a plant with excellent adaptability to salt stress. Among the var…	Rejected	No PGPR
WRKY' + 'gene express'+ 'drought stress' + ' plants'+ 'PGPR'	Google Scholar	Transcriptional profiling in cotton associated with Bacillus subtilis (UFLA285) induced biotic-stress tolerance	Medeiros et al., 2011	Plant growth promoting rhizobacteria (PGPR) confer disease resistance in many agricultural crops. In the case of Bacillus subtilis (UFLA285) isolated from the cotton producing state of Mato Grosso (Brazil), in addition to inducing foliar and root growth, disease resistance against damping-off caused by Rhizoctonia solani was observed. The aim of this cotton study was to identify gene transcriptio…	rejected	Biotic stress
WRKY' + 'gene express'+ 'drought stress' + ' plants'+ 'PGPR'	Google Scholar	Revisiting bacterial volatile-mediated plant growth promotion: lessons from the past and objectives for the future	Sharifi et al., 2018	• Background Bacterial volatile compounds (BVCs) are important mediators of beneficial plant–bacteria inter- actions. BVCs promote above-ground plant growth by stimulating photosynthesis and sugar accumulation and by modulating phytohormone signalling. These compounds also improve below-ground mineral uptake and modify root system architecture. • Scope We review advances in our understanding of t…	Rejected	Review
WRKY' + 'gene express'+ 'drought stress' + ' plants'+ 'PGPR'	Google Scholar	Mitigation of Abiotic Stress in Legume-Nodulating Rhizobia for Sustainable Crop Production	Sindhu et al., 2020	Rhizobia form nitrogen-fixing nodules on leguminous plants and convert atmospheric nitrogen to plant-utilizable ammonia resulting into increased plant growth and crop yield. The growth of crops and rhizobia is adversely affected by various abiotic stresses including high temperature, soil salinity and drought. Under saprophytic phase in the soil, free- living rhizobial population usually declines…	Rejected	Review
WRKY' + 'gene express'+ 'drought stress' + ' plants'+ 'PGPR'	Google Scholar	An Energy‐Rich Phosphate Compound Enhances the Growth of Lettuce Through the Activation of Photosynthesis, Growth, and Induced Systemic Resistance–Related Processes	Zhou et al., 2022	The large inputs of chemical fertilizer in protected vegetable cultivation have caused lower plant nutrient use efficiency and soil secondary salinization. The current trend is to seek a biotype foliar fertilizer and explore its growth-promoting mecha- nism. Calcium fructose-1,6-diphosphate (FB), an energy-rich phosphate compound, was evaluated for growth, photosyn- thesis, nutrient uptake, and s…	Rejected	No WRKY
WRKY' + 'gene express'+ 'drought stress' + ' plants'+ 'PGPR'	Google Scholar	Phenotypical and molecular responses of Arabidopsis thaliana roots as a result of inoculation with the auxin-producing bacterium Azospirillum brasilense	Spaepen et al., 2013	_x0015_ The auxin-producing bacterium Azospirillum brasilense Sp245 can promote the growth of several plant species. The model plant Arabidopsis thaliana was chosen as host plant to gain an insight into the molecular mechanisms that govern this interaction. _x0015_ ThedeterminationofdifferentialgeneexpressioninArabidopsisrootsafterinoculationwith either A. brasilense wild-type or an auxin biosynt…	Rejected	No abiotic stress
WRKY' + 'gene express'+ 'drought stress' + ' plants'+ 'PGPR'	Google Scholar	The response of salt-stressed Valencia sweet orange (Citrus sinensis) to salicylic acid and methyl jasmonate treatments	Mahmoudv et al., 2021	Salinity is an obstacle to citriculture worldwide, and is a concern in arid, semiarid, and coastal regions. In the current study, we irrigated one-year-old ‘Valencia’ trees budded onto Kuharske rootstock with 60 mM sodium chloride (NaCl) solution for ten weeks. Subsequently, these trees were sprayed with 50, 75, and 100 mM SA or MeJA to determine whether these phytohormones could alleviate the de…	Rejected	No PGPR
WRKY' + 'gene express'+ 'drought stress' + ' plants'+ 'PGPR'	Google Scholar	The walnut JrVHAG1 gene is involved in cadmium stress response through ABA-signal pathway and MYB transcription regulation	Xu et al., 2018	Background: Vacuolar H+-ATPase (V-ATPase) is a vital protein complex involved in abiotic stress response in plants. The G subunit of Juglans regia (JrVHAG1) was previously identified as a drought tolerance-related gene involved in the ABA (abscisic acid)-signal pathway. Heavy metal stress is becoming a major detriment for plant growth, development, and production. In order to understand the role …	Rejected	No PGPR
WRKY' + 'gene express'+ 'drought stress' + ' plants'+ 'PGPR'	Google Scholar	Microbial consortium mediated growth promotion and Arsenic reduction in Rice: An integrated transcriptome and proteome profiling	Awasthi et al., 2021	The adverse effects of arsenic (As) contamination are well known. Rice is a staple food for 50% of the world population but the accumulation of As into rice hampers the food security and safety. Thus the amelioration of As stress and reduction of As levels in rice are needed. In this study, transcriptome (Illumina sequencing) and proteome (2D gel electrophoresis) explored mechanisms of consortium…	Rejected	No drought stress
WRKY' + 'gene express'+ 'drought stress' + ' plants'+ 'PGPR'	Google Scholar	Plant endophytic Pseudomonas putida BP25 induces expression of defense genes in black pepper roots: Deciphering through suppression subtractive hybridization analysis	Agisha et al., 2017	Black pepper associated endophytic Pseudomonas putida BP25 displayed broad spectrum antagonistic activity against a wide range of plant pathogens. The molecular responses of black pepper upon endo- phytic colonization by P. putida BP25 was studied using a PCR based suppression subtractive hybridi- zation (SSH) method. The transcripts induced by endophytic P. putida BP25 in black pepper included p…	Rejected	Biotic stress
WRKY' + 'gene express'+ 'drought stress' + ' plants'+ 'PGPR'	Google Scholar	Efficacy and Durability of Paenibacillus sp. strain B2 in Co-Inoculation with Arthrobacter sp. SSM-004 and Microbacterium sp. SSM-001 for Growth Promotion and Resistance Induction in Wheat against Mycosphaerella graminicola and Drought Stress	Samain et al., 2022	Plant Growth-Promoting Rhizobacteria (PGPR) are able to promote plant growth and/or induce local and systemic resistance against biotic and abiotic stresses, but the stability and durability of their efficiency still need more investigation. The present work aims to identify a compatible-PGPR-mixture effective to stimulate wheat growth, resistance against Mycosphaerella graminicola, the causal ag…	Rejected	Biotic stress
WRKY' + 'gene express'+ 'drought stress' + ' plants'+ 'PGPR'	Google Scholar	Gene networks underlying the early regulation of Paraburkholderia phytofirmans PsJN induced systemic resistance in Arabidopsis	Timmermann et al., 2019	Plant defense responses to biotic stresses are complex biological processes, all governed by sophisticated molecular regulations. Induced systemic resistance (ISR) is one of these defense mechanisms where beneficial bacteria or fungi prime plants to resist pathogens or pest attacks. In ISR, the defense arsenal in plants remains dormant and it is only triggered by an infection, allowing a better a…	Rejected	Biotic stress
WRKY' + 'gene express'+ 'drought stress' + ' plants'+ 'PGPR'	Google Scholar	Alfalfa (Medicago sativa L.) MsCML46 gene encoding calmodulin‐like protein confers tolerance to abiotic stress in tobacco	Du et al., 2021	Abiotic stresses are major environmental factors that constraint crop productivity worldwide. Various stimuli regu- late intracellular calcium levels and calcium-mediated signal transduction, and cellular responses. Ca2+ signals are perceived by different Ca2+ receptors. Calmodulin-like protein (CML) is one of the best-characterized Ca2+ sensors which shares sequence similarity with highly conser…	Rejected	No PGPR
WRKY' + 'gene express'+ 'drought stress' + ' plants'+ 'PGPR'	Google Scholar	Burkholderia phytofirmans PsJN Confers Grapevine Resistance against Botrytis cinerea via a Direct Antimicrobial Effect Combined with a Better Resource Mobilization	Miotto-Vilanova et al., 2016	Plant innate immunity serves as a surveillance system by providing the first line of powerful weapons to fight against pathogen attacks. Beneficial microorganisms and Microbial-Associated Molecular Patterns might act as signals to trigger this immunity. Burkholderia phytofirmans PsJN, a highly efficient plant beneficial endophytic bacterium, promotes growth in a wide variety of plants including g…	Rejected	Biotic stress
WRKY' + 'gene express'+ 'drought stress' + ' plants'+ 'PGPR'	Google Scholar	Kappaphycus alvarezii sap mitigates abiotic-induced stress in Triticum durum by modulating metabolic coordination and improves growth and yield	Patel et al., 2018	Kappaphycus alvarezii sap (K-sap) facilitates plant growth in stressful environments by regulating the stress signalling compo- nents of the plant system. In the present study, the effect of K-sap on three durum wheat varieties, commercially important for pasta and semolina is studied in response to salt and drought stress during both vegetative and reproductive growth phases. The application of …	Rejected	No PGPR
WRKY' + 'gene express'+ 'drought stress' + ' plants'+ 'PGPR'	Google Scholar	Rhizophagus intraradices promotes alfalfa (Medicago sativa) defense against pea aphids (Acyrthosiphon pisum) revealed by RNA-Seq analysis	Li et al., 2019	Pea aphids (Acyrthosiphon pisum) are one of the most important insect pests of alfalfa (Medicago sativa). Arbuscular mycorrhizal (AM) fungi are important microorganisms of the agroecosystem that promote plant growth and improve plant resistance to abiotic and biotic stress. Little information is available on AM fungi-regulated defense responses of alfalfa to pea aphids. To better understand how a…	Rejected	Biotic stress
WRKY' + 'gene express'+ 'drought stress' + ' plants'+ 'PGPR'	Google Scholar	Molecular Basis of Endophytic Bacillus megaterium-induced Growth Promotion in Arabidopsis thaliana: Revelation by Microarray-based Gene Expression Analysis	Vibhuti et al., 2017	Black pepper root endophytic Bacillus megaterium BP17 (BmBP17) displayed excellent antagonistic activity against diverse plant pathogens. BmBP17 endo- phytically colonized plantlets of Arabidopsis with significant growth promotion as exemplified by increased root and shoot length. To elucidate the molecular basis of growth promotion, microarray-based gene expression pro- filing was performed on i…	Rejected	No abiotic stress
WRKY' + 'gene express'+ 'drought stress' + ' plants'+ 'PGPR'	Google Scholar	Identification of Regulatory Networks of MicroRNAs and Their Targets in Response to Colletotrichum gloeosporioides in Tea Plant (Camellia sinensis L.)	Jeyaraj et al., 2019	Anthracnose disease is caused by Colletotrichum gloeosporioides, and is common in leaves of the tea plant (Camellia sinensis). MicroRNAs (miRNAs) have been known as key modulators of gene expression in response to environmental stresses, disease resistance, defense responses, and plant immunity. However, the role of miRNAs in responses to C. gloeosporioides remains unexplored in tea plant. Theref…	Rejected	Biotic stress
WRKY' + 'gene express'+ 'drought stress' + ' plants'+ 'PGPR'	Google Scholar	Recent Duplications Dominate VQ and WRKY Gene Expansions in Six Prunus Species	Zhong et al., 2011		Rejected	duplicate
WRKY' + 'gene express'+ 'drought stress' + ' plants'+ 'PGPR'	Google Scholar	Recent Advances in PGPR and Molecular Mechanisms Involved in Drought Stress Resistance	Sati et al., 2021	Increased severity of droughts, due to anthropogenic activities and global warming, has imposed a severe threat on agri- cultural productivity. This has escalated the need for environmentally sustainable solutions to secure global food security. In this context, the application of plant growth-promoting rhizobacteria (PGPR) can be beneficial. PGPR through various mechanisms viz. osmotic adjustmen…	Rejected	Review
WRKY' + 'gene express'+ 'drought stress' + ' plants'+ 'PGPR'	Google Scholar	Growing more with less: Breeding and developing drought resilient soybean to improve food security	Dubey et al., 2019	Soybean (Glycine max L.) is considered an important crop, and enhancing its production under drought stress and changing climatic conditions to meet the challenges of global food security is crucial. Drought is considered one of the major abiotic factors that adversely affect soybean production. To address this challenge, we need to develop an integrative research approach that will bring togethe…	Rejected	Review
WRKY' + 'gene express'+ 'drought stress' + ' plants'+ 'PGPR'	Google Scholar	An update on biological advancement of Jatropha curcas L.: New insight and challenges	Mazumdar et al., 2018	Sustainable production of non-food oleaginous crops is highly desirable towards meeting increasing global de- mands for energy by supplementing the diminishing supply of fossil fuels without affecting food security. Jatropha curcas L., a high yielding oleaginous seed crop (30–48% oil), with a simple propagation system, short gestation period and high adaptability to a wide range of climatic and e…	Rejected	Review
WRKY' + 'gene express'+ 'drought stress' + ' plants'+ 'PGPR'	Google Scholar	Unsnarling Plausible Role of Plant Growth‐Promoting Rhizobacteria for Mitigating Cd‐Toxicity from Plants: An Environmental Safety Aspect	Khanna et al., 2022	Cadmium (Cd) is predominantly observed within the soil to cause deterioration of plant and microbial activities within rhizosphere. Cd-toxicity leads to major agricultural constraints due to its accumulation within plants and therefore entry within food chain. Plants face numerous repercussions like stunted growth, chlorosis, necrosis, inhibition of photosynthetic machinery and other physiologica…	Rejected	Review
WRKY' + 'gene express'+ 'drought stress' + ' plants'+ 'PGPR'	Google Scholar	Halotolerant Rhizobacteria for Salinity-Stress Mitigation: Diversity, Mechanisms and Molecular Approaches	Sagar et al., 2022	Agriculture is the best foundation for human livelihoods, and, in this respect, crop pro- duction has been forced to adopt sustainable farming practices. However, soil salinity severely affects crop growth, the degradation of soil quality, and fertility in many countries of the world. This results in the loss of profitability, the growth of agricultural yields, and the step-by-step decline of the…	Rejected	Review
WRKY' + 'gene express'+ 'drought stress' + ' plants'+ 'PGPR'	Google Scholar	Bacillus velezensis YYC promotes tomato growth and induces resistance against bacterial wilt	Yan et al., 2022	In the present study, we investigated the effect of Bacillus velezensis YYC on tomato plant growth and its bio- logical control efficacy of bacterial wilt. Results indicated that the number of fibrous tomato roots increased significantly in the growth promotion assays. B. velezensis YYC also significantly reduced the percentage of bacterial wilt in tomato plants in a pot experiment. It may enhanc…	Rejected	Biotic stress
WRKY' + 'gene express'+ 'drought stress' + ' plants'+ 'PGPR'	Google Scholar	Transcriptome analysis of Arabidopsis reveals freezing-tolerance related genes induced by root endophytic fungus Piriformospora indica	Jiang et al., 2021	Freezing stress is a serious environmental factor that obstructs plant development. The root endophytic fungus Piriformospora indica has proved to be effective to confer abiotic stress tolerance to host plants. To investigate how P. indica improves freezing tolerance, we compared the expression profiles of P. indica-colonized and uncolo- nized Arabidopsis seedlings either exposed to freezing stre…	Rejected	Fungi
WRKY' + 'gene express'+ 'drought stress' + ' plants'+ 'PGPR'	Google Scholar	The Effect of Plant Genotype, Growth Stage, and Mycosphaerella graminicola Strains on the Efficiency and Durability of Wheat-Induced Resistance by Paenibacillus sp. Strain B2	Samain et al., 2019	Plant-growth-promoting rhizobacteria are known as potential biofertilizers and plant- resistance inducers. The current work aims to study the durability of the resistance induced as a response to the inoculation of wheat grains with Paenibacillus sp. strain B2 (PB2) and its influence by plant genotype, growth stage, and Mycosphaerella graminicola strain (the causal agent of Septoria tritici blotc…	Rejected	Biotic stress
WRKY' + 'gene express'+ 'drought stress' + ' plants'+ 'PGPR'	Google Scholar	Microbe-mediated amelioration of salinity stress in plants	Phurailatpam et al., 2021	Salinity, one of the major abiotic stresses faced by crop plants, is responsible for causing >20% loss in crop productivity worldwide. The elevated salt ion concentration (mainly Na+ and Cl-) in soil or water creates osmotic stress, oxidative stress and ion toxicity in plant cells. Salinity stress affects plant growth, development and survival by hampering seed germination, photosynthesis, water …	Rejected	Review
WRKY' + 'gene express'+ 'drought stress' + ' plants'+ 'PGPR'	Google Scholar	Tissue-specific synergistic bio-priming of pepper by two Streptomyces species against Phytophthora capsici	Abbasi et al., 2020	Among several studied strains, Streptomyces rochei IT20 and S. vinaceusdrappus SS14 showed a high level of inhibitory effect against Phytophthora capsici, the causal agent of pepper blight. The effect of two mentioned superior antagonists, as single or combination treatments, on suppression of stem and fruit blight diseases and reproductive growth pro- motion was investigated in pepper. To explor…	Rejected	Biotic stress
WRKY' + 'gene express'+ 'drought stress' + ' plants'+ 'PGPR'	Google Scholar	Improving crop drought resistance with plant growth regulators and rhizobacteria: Mechanisms, applications, and perspectives	Zhang et al., 2022	Drought is one of the main abiotic stresses that cause crop yield loss. Improving crop yield under drought stress is a major goal of crop breeding, as it is critical to food security. The mechanism of plant drought resistance has been well studied, and diverse drought resistance genes have been identified in recent years, but transferring this knowledge from the laboratory to field production rem…	Rejected	Review
WRKY' + 'gene express'+ 'drought stress' + ' plants'+ 'PGPR'	Google Scholar	Plant growth promoting bacteria as an alternative strategy for salt tolerance in plants: A review	Numan et al., 2018	Approximately 5.2 billion hectare agriculture land are affected by erosion, salinity and soil degradation. Salinity stress has significantly affecting the fertile lands, and therefore possesses a huge impact on the agriculture and economy of a country. Salt stress has severe effects on the growth and development of plants as well as reducing its yield. Plants are inherently equipped with stress t…	Rejected	Review
WRKY' + 'gene express'+ 'drought stress' + ' plants'+ 'PGPR'	Google Scholar	Recent advances in physiological and molecular mechanisms of heavy metal accumulation in plants	Feki et al., 2021	Among abiotic stress, the toxicity of metals impacts negatively on plants’ growth and productivity. This toxicity promotes various perturbations in plants at different levels. To withstand stress, plants involve efficient mechanisms through the impli- cation of various signaling pathways. These pathways enhance the expression of many target genes among them gene coding for metal transporters. Var…	Rejected	Review
WRKY' + 'gene express'+ 'drought stress' + ' plants'+ 'PGPR'	Google Scholar	Comparison of the transcriptomes of American chestnut (Castanea dentata) and Chinese chestnut (Castanea mollissima) in response to the chestnut blight infection	Barakat et al., 2008	Background1471-2229-9-51: American chestnut (Castanea dentata) was devastated by an exotic pathogen in the beginning of the twentieth century. This chestnut blight is caused by Cryphonectria parasitica, a fungus that infects stem tissues and kills the trees by girdling them. Because of the great economic and ecological value of this species, significant efforts have been made over the century to …	Rejected	Biotic stress
WRKY' + 'gene express'+ 'drought stress' + ' plants'+ 'PGPR'	Google Scholar	Elucidating the Molecular Mechanisms by which Seed-Borne Endophytic Fungi, Epichloë gansuensis, Increases the Tolerance of Achnatherum inebrians to NaCl Stress	Cheng et al., 2021	Seed-borne endophyte Epichloë gansuensis enhance NaCl tolerance in Achnatherum inebrians and increase its biomass. However, the molecular mechanism by which E. gansuensis increases the tolerance of host grasses to NaCl stress is unclear. Hence, we firstly explored the full-length tran- scriptome information of A. inebrians by PacBio RS II. In this work, we obtained 738,588 full-length non-chimeri…	Rejected	Fungi
WRKY' + 'gene express'+ 'drought stress' + ' plants'+ 'PGPR'	Google Scholar	An Insight into microRNA156 Role in Salinity Stress Responses of Alfalfa	Arshad et al., 2017	Salinity is one of the major abiotic stresses affecting alfalfa productivity. Developing salinity tolerant alfalfa genotypes could contribute to sustainable crop production. The functions of microRNA156 (miR156) have been investigated in several plant species, but so far, no studies have been published that explore the role of miR156 in alfalfa response to salinity stress. In this work, we studie…	Rejected	No PGPR
WRKY' + 'gene express'+ 'drought stress' + ' plants'+ 'PGPR'	Google Scholar	Uncovering the role of melatonin in plant stress tolerance	Ayyaz et al., 2022	In recent years, melatonin has emerged as a popular research topic in the field of plant biology. Since melatonin is implicated in numerous plant developmental processes and stress responses, the exploration of its roles in regulating various physi- ological and biochemical processes contributing to plant growth and development under normal or stress conditions has become a rapidly progressing fi…	Rejected	Review
WRKY' + 'gene express'+ 'drought stress' + ' plants'+ 'PGPR'	Google Scholar	Root Involvement in Plant Responses to Adverse Environmental Conditions	Vives-Peris et al., 2020	Climate change is altering the environment in which plants grow and survive. An increase in worldwide Earth surface temperatures has been already observed, together with an increase in the intensity of other abiotic stress conditions such as water deficit, high salinity, heavy metal intoxication, etc., generating harmful conditions that destabilize agricultural systems. Stress conditions deeply a…	Rejected	Review
WRKY' + 'gene express'+ 'drought stress' + ' plants'+ 'PGPR'	Google Scholar	Ascorbate Peroxidase and Catalase Activities and Their Genetic Regulation in Plants Subjected to Drought and Salinity Stresses	Sofo et al., 2015	Hydrogen peroxide (H2O2), an important relatively stable non-radical reactive oxygen species (ROS) is produced by normal aerobic metabolism in plants. At low concentrations, H2O2 acts as a signal molecule involved in the regulation of specific biological/physiological processes (photosynthetic functions, cell cycle, growth and development, plant responses to biotic and abiotic stresses). Oxidativ…	Rejected	Review
WRKY' + 'gene express'+ 'drought stress' + ' plants'+ 'PGPR'	Google Scholar	Alternative Strategies for Multi-Stress Tolerance and Yield Improvement in Millets	Numan et al., 2021	Millets are important cereal crops cultivated in arid and semiarid regions of the world, particularly Africa and southeast Asia. Climate change has triggered multiple abiotic stresses in plants that are the main causes of crop loss worldwide, reducing average yield for most crops by more than 50%. Although millets are tolerant to most abiotic stresses including drought and high temperatures, furt…	Rejected	Review
WRKY' + 'gene express'+ 'drought stress' + ' plants'+ 'PGPR'	Google Scholar	Plant secondary metabolites synthesis and their regulations under biotic and abiotic constraints	Khare et al., 2020	Plants being sessile entities are often subjected to varied environmental stresses. They have developed an alternative defense mechanism that involves a vast variety of secondary metabolites to serve as tools to cope up with various stress conditions. The exposure of plant cells to abiotic and biotic stresses initiate multilevel reaction cascades that consequently leads to pro- duction and accumu…	Rejected	Review
WRKY' + 'gene express'+ 'drought stress' + ' plants'+ 'PGPR'	Google Scholar	Elucidating the Response of Crop Plants towards Individual, Combined and Sequentially Occurring Abiotic Stresses	Anwar et al., 2021	In nature, plants are exposed to an ever-changing environment with increasing frequen- cies of multiple abiotic stresses. These abiotic stresses act either in combination or sequentially, thereby driving vegetation dynamics and limiting plant growth and productivity worldwide. Plants’ responses against these combined and sequential stresses clearly differ from that triggered by an indi- vidual st…	Rejected	Review
WRKY' + 'gene express'+ 'drought stress' + ' plants'+ 'PGPR'	Google Scholar	Salt stress alleviation in citrus plants by plant growth-promoting rhizobacteria Pseudomonas putida and Novosphingobium sp.	Vives‑Peris et al., 2018	Detrimental salt stress effects on crops are likely to increase due to climate change reducing the quality of irriga- tion water. Plant growth-promoting rhizobacteria (PGPRs) can mitigate stress-induced damage in plants cultivated under high salinity conditions. In this work, Citrus macrophylla (alemow) plants inoculated with the rhizobacteria Pseudomonas putida KT2440 or Novosphingobium sp. HR1a…	Rejected	No WRKY
WRKY' + 'gene express'+ 'drought stress' + ' plants'+ 'PGPR'	Google Scholar	The biological approaches of altering the growth and biochemical properties of medicinal plants under salinity stress	Miransari et al., 2021	Due to their interesting properties for human health, medicinal plants are of worldwide interest, including Iran. More has yet to be investigated and analyzed on the use of methods affecting medicinal plant growth and biochemical properties under stress. The important question about medicinal plants is the purpose of their plantation, determining their growth conditions. The present review articl…	Rejected	Review
WRKY' + 'gene express'+ 'drought stress' + ' plants'+ 'PGPR'	Google Scholar	Bacterial endophytome‐mediated resistance in banana for the management of Fusarium wilt	Nakkeeran et al., 2021	Banana (Musa spp.), a major cash and staple fruit crop in many parts of the world, is infected by Fusarium wilt, which contributes up to 100% yield loss and causes social consequences. Race 1 and race 2 of Panama wilt caused by Fusarium oxysporum f. sp. cubense (Foc) are prevalent worldwide and seriously affect many traditional varieties. The threat of Foc tropical race 4 (Foc TR4) is looming lar…	Rejected	Biotic stress
WRKY' + 'gene express'+ 'drought stress' + ' plants'+ 'PGPR'	Google Scholar	Differential regulation of drought stress by biological membrane transporters and channels	Singh et al., 2021	Stress arising due to abiotic factors affects the plant’s growth and productivity. Among several existing abiotic stressors like cold, drought, heat, salinity, heavy metal, etc., drought condition tends to affect the plant’s growth by inducing two-point effect, i.e., it disturbs the water balance as well as induces toxicity by disturbing the ion homeostasis, thus hindering the growth and producti…	Rejected	Review
WRKY' + 'gene express'+ 'drought stress' + ' plants'+ 'PGPR'	Google Scholar	Impact of root exudates and plant defense signaling on bacterial communities in the rhizosphere. A review	Doornbos et al., 2012	Despite significant advances in crop protection, plant diseases cause a 20% yield loss in food and cash crops worldwide. Therefore, interactions between plants and pathogens have been studied in great detail. In contrast, the interplay between plants and non-pathogenic micro- organisms has received scant attention, and differential responses of plants to pathogenic and non-pathogenic microorganis…	Rejected	Review
WRKY' + 'gene express'+ 'drought stress' + ' plants'+ 'PGPR'	Google Scholar	Bacterial-Mediated Tolerance and Resistance to Plants Under Abiotic and Biotic Stresses	Choudhary et al., 2016	Plant growth-promoting bacteria (PGPB) are capable of alleviating environmental stress and eliciting tolerance in plants to promote their growth. Several PGPB elicit physical and/or chemical changes related to plant defense in the form of induced systemic resistance (ISR) under biotic stress. Researchers emphasized that PGPB- elicited ISR has suppressed plant diseases caused by a range of pathoge…	Rejected	Review
WRKY' + 'gene express'+ 'drought stress' + ' plants'+ 'PGPR'	Google Scholar	Functional Analysis of the Soybean GmCDPK3 Gene Responding to Drought and Salt Stresses	Wang et al., 2019	Plants have a series of response mechanisms to adapt when they are subjected to external stress. Calcium-dependent protein kinases (CDPKs) in plants function against a variety of abiotic stresses. We screened 17 CDPKs from drought- and salt-induced soybean transcriptome sequences. The phylogenetic tree divided CDPKs of rice, Arabidopsis and soybean into five groups (I–V). Cis-acting element analy…	Rejected	No WRKY
WRKY' + 'gene express'+ 'drought stress' + ' plants'+ 'PGPR'	Google Scholar	Impact of Nitrogen Nutrition on Cannabis sativa: An Update on the Current Knowledge and Future Prospects	Landi et al., 2019	Nitrogen (N) availability represents one of the most critical factors affecting cultivated crops. N is indeed a crucial macronutrient influencing major aspects, from plant development to productivity and final yield of lignocellulosic biomass, as well as content of bioactive molecules. N metabolism is fundamental as it is at the crossroad between primary and secondary metabolic pathways: Besides …	Rejected	Review
WRKY' + 'gene express'+ 'drought stress' + ' plants'+ 'PGPR'	Google Scholar	Identification of miRNAs Involved in Bacillus velezensis FZB42-Activated Induced Systemic Resistance in Maize	Xie et al., 2019	Bacillus velezensis FZB42 is able to activate induced systemic resistance (ISR) to enhance plant defense response against pathogen infections. Though the roles of microRNAs (miRNAs) in Bacillus-triggered ISR have been reported in Arabidopsis, the maize miRNAs responsible for the Bacillus-activated ISR process have not been discovered. To explore the maize miRNAs involved in ISR, maize miRNAs in r…	Rejected	No WRKY
WRKY' + 'gene express'+ 'drought stress' + ' plants'+ 'PGPR'	Google Scholar	Enhancement of drought tolerance in diverse Vicia faba cultivars by inoculation with plant growth‐promoting rhizobacteria under newly reclaimed soil conditions	Mansour et al., 2021	Water deficit has devastating impacts on legume production, particularly with the current abrupt climate changes in arid environments. The application of plant growth‐promoting rhizobacteria (PGPR) is an effective approach for producing natural nitrogen and attenuating the detrimental effects of drought stress. This study investigated the influence of inoculation with the PGPR Rhizobium leguminos…	Rejected	No WRKY
WRKY' + 'gene express'+ 'drought stress' + ' plants'+ 'PGPR'	Google Scholar	Sphingobacterium sp. BHU-AV3 Induces Salt Tolerance in Tomato by Enhancing Antioxidant Activities and Energy Metabolism	Vaishnav et al., 2020	Salt tolerant bacteria can be helpful in improving a plant’s tolerance to salinity. Although plant–bacteria interactions in response to salt stress have been characterized, the precise molecular mechanisms by which bacterial inoculation alleviates salt stress in plants are still poorly explored. In the present study, we aimed to determine the role of a salt-tolerant plant growth-promoting rhizoba…	Rejected	No WRKY
WRKY' + 'gene express'+ 'drought stress' + ' plants'+ 'PGPR'	Google Scholar	Vital roles of carotenoids in plants and humans to deteriorate stress with its structure, biosynthesis, metabolic engineering and functional aspects	Swapnil et al., 2021	Carotenoids are long conjugated isoprenoid molecules with over 1117 identified structures, belongs to the class of hydrocarbons, involved in a range of biological processes in plants and humans. In plant cells, plastids are the organelles that play a central role in governing biosynthesis, stability and activity of carotenoids, and their di- versity. In photosynthetic tissues, carotenoids act as …	Rejected	Review
WRKY' + 'gene express'+ 'drought stress' + ' plants'+ 'PGPR'	Google Scholar	The influence of endophytes on rice fitness under environmental stresses	Ganie et al., 2022	Rice (Oryza sativa) crop is continuously subjected to biotic and abiotic stresses, compromising growth and conse- quently yield. The situation is exacerbated by climate change impacting on ecosystems and biodiversity. Genetic engineering has been used to develop stress-tolerant rice, alongside physical and chemical methods to mitigate the effect of these stresses. However, the success of these st…	Rejected	Review
WRKY' + 'gene express'+ 'drought stress' + ' plants'+ 'PGPR'	Google Scholar	Plant growth-promoting endophyte Piriformospora indica alleviates salinity stress in Medicago truncatula	Li et al., 2017	Piriformospora indica, a cultivable root endophytic fungus, induces growth promotion as well as biotic stress resistance and tolerance to abiotic stress in a broad range of host plants. In this study, the potential protection for M Medicago truncatula plants from salinity stress by P. indica was explored. The improved plant growth under severe saline condition was exhibited in P. indica-colonized…	Rejected	No WRKY
WRKY' + 'gene express'+ 'drought stress' + ' plants'+ 'PGPR'	Google Scholar	Seed priming with melatonin: A promising approach to combat abiotic stress in plants	Rajora et al., 2022	Melatonin is an indolic compound derived from tryptophan and has an important role in the general processes of plants including germination, photosynthesis, circadian rhythms, flowering, senescence, and alleviating stress. Integrating melatonin application to agronomical practices reportedly provides numerous benefits. More particularly seed priming with melatonin has been shown to improve seed g…	Rejected	Review
WRKY' + 'gene express'+ 'drought stress' + ' plants'+ 'PGPR'	Google Scholar	Synthetic bacterial community derived from a desert rhizosphere confers salt stress resilience to tomato in the presence of a soil microbiome	Schmitz et al., 2022	The root bacterial microbiome is important for the general health of the plant. Additionally, it can enhance tolerance to abiotic stresses, exemplified by plant species found in extreme ecological niches like deserts. These complex microbe-plant interactions can be simplified by constructing synthetic bacterial communities or SynComs from the root microbiome. Furthermore, SynComs can be applied a…	Rejected	No drought stress
WRKY' + 'gene express'+ 'drought stress' + ' plants'+ 'PGPR'	Google Scholar	Sheath blight of rice: a review and identification of priorities for future research	Singh et al., 2019	Rice sheath blight, caused by Rhizoctonia solani AG1-1A, is one of the most devasting diseases of the crop. To move forward with effective crop protection against sheath blight, it is important to review the published information related to pathogenicity and disease management and to determine areas of research that require deeper study. While progress has been made in the identification of patho…	Rejected	Review
WRKY' + 'gene express'+ 'drought stress' + ' plants'+ 'PGPR'	Google Scholar	Selective modification of rice (Oryza sativa) gene expression by rice stripe virus infection	Satoh et al., 2010	Rice stripe disease, caused by rice stripe virus (RSV), is one of the major virus diseases in east Asia. Rice plants infected with RSV usually show symptoms such as chlorosis, weakness, necrosis in newly emerged leaves and stunting. To reveal rice cellular systems influenced by RSV infection, temporal changes in the transcriptome of RSV-infected plants were monitored by a customized rice oligoarr…	Rejected	Biotic stress
WRKY' + 'gene express'+ 'drought stress' + ' plants'+ 'PGPR'	Google Scholar	Molecular responses to drought stress in plants	Kaur et al., 2017	Drought is a severe environmental constraint to plant productivity. Being a multidimensional stress, it triggers a wide variety of plant responses ranging from physiological, biochemical to molecular levels. One of the inevitable consequences of drought stress is an increase in reactive oxygen species (ROS) production in different cellular compartments, namely the chloroplasts and mitochondria. T…	Rejected	Review
WRKY' + 'gene express'+ 'drought stress' + ' plants'+ 'PGPR'	Google Scholar	Physiological and Transcriptomic Analysis provide Molecular Insight into 24-Epibrassinolide mediated Cr(VI)-Toxicity Tolerance in Pepper Plants	Mumtaz et al., 2022	The ever-increasing industrial activities over the decades have generated high toxic metals such as chromium (Cr) that hampers plant growth and development. To counter Cr-toxicity, plants have evolved complex defensive systems including hormonal crosstalk with various signaling pathways. 24-epibrassinolide (24-EBR) lowers oxidative stress and alleviates Cr(VI)-toxicity in plants. In this study, t…	Rejected	No PGPR
WRKY' + 'gene express'+ 'drought stress' + ' plants'+ 'PGPR'	Google Scholar	Combined Application of Biochar and Biocontrol Agents Enhances Plant Growth and Activates Resistance Against Meloidogyne incognita in Tomato	Arshad et al., 2021	Biochar (BC) is known to enhance plant growth and may activate plant resistance to various soil borne pathogens. In this experiment, the rice husk (RH) BC was combined with biocontrol agents (BCAs), Bacillus subtilis and Trichoderma harzianum against Meloidogyne incognita in tomato and the efficacy of BC and BCAs in boosting overall plant biomass assessed side by side. BCAs along with 3% RH BC we…	Rejected	Biotic stress
WRKY' + 'gene express'+ 'drought stress' + ' plants'+ 'PGPR'	Google Scholar	Relationship between signaling and metabolic pathways of grapevines under temperature and light stresses—a review	Askari-Khorasgani et al., 2019	Depending on plant genotype–environment interactions, cell signal trans- duction, and thereby gene expression, disruptive or promotive effects on grapevine physiology, metabolism, and, consequently, fruit quality and yield may occur. This review article aims to evaluate the effects of tem- perature and light stress on grapevine signaling and metabolic pathways to provide insights into breeding/en…	Rejected	Review
WRKY' + 'gene express'+ 'drought stress' + ' plants'+ 'PGPR'	Google Scholar	Relationship between signaling and metabolic pathways of grapevines under temperature and light stresses—a review	Askari-Khorasgani et al., 2019		Rejected	duplicate
WRKY' + 'gene express'+ 'drought stress' + ' plants'+ 'PGPR'	Google Scholar	Response Mechanisms of Plants Under Saline-Alkali Stress	Fang et al., 2021	As two coexisting abiotic stresses, salt stress and alkali stress have severely restricted the development of global agriculture. Clarifying the plant resistance mechanism and determining how to improve plant tolerance to salt stress and alkali stress have been popular research topics. At present, most related studies have focused mainly on salt stress, and salt-alkali mixed stress studies are re…	Rejected	Review
WRKY' + 'gene express'+ 'drought stress' + ' plants'+ 'PGPR'	Google Scholar	Microbiological Activity for Soil and Plant Health Management	Fazeli-Nasab et al., 2021		Rejected	Book
WRKY' + 'gene express'+ 'drought stress' + ' plants'+ 'PGPR'	Google Scholar	Drought Tolerance Strategies in Plants: A Mechanistic Approach	Ilyas et al., 2021	Anthropogenic activities in the past and present eras have created global warming and consequently a storm of drought stress, affecting both plants and animals. Being sessile, plants are more vulnerable to drought stress and consequently reduce plant growth and yield. To mitigate the effects of drought stress on plants, it is very crucial to determine the plant response mechanisms against drought…	Rejected	Review
WRKY' + 'gene express'+ 'drought stress' + ' plants'+ 'PGPR'	Google Scholar	Transcriptome Changes Induced by Botrytis cinerea Stress and Weighted Gene Co‐expression Network Analysis (WGCNA) in Actinidia chinensis	Li et al., 2022	Kiwifruit (Actinidia chinensis) is rich in dietary fiber and vitamin C and has high commercial value. However, it is susceptible to Botrytis cinerea pathogenesis. This fungus causes gray mold rot which negatively impacts kiwifruit quality. It also induces changes in superoxide dismutase, peroxidase, and catalase activity. Peroxidase and superoxide dismutase activities were detected at 1 dpi, incr…	Rejected	Biotic stress
WRKY' + 'gene express'+ 'drought stress' + ' plants'+ 'PGPR'	Google Scholar	Physiological and Transcriptomic Analysis provide Molecular Insight into 24-Epibrassinolide mediated Cr(VI)-Toxicity Tolerance in Pepper Plants	Mumtaz et al., 2022		Rejected	duplicate
WRKY' + 'gene express'+ 'drought stress' + ' plants'+ 'PGPR'	Google Scholar	Research Progress and Perspective on Drought Stress in Legumes: A Review	Nadeem et al., 2019	Climate change, food shortage, water scarcity, and population growth are some of the threatening challenges being faced in today’s world. Drought stress (DS) poses a constant challenge for agricultural crops and has been considered a severe constraint for global agricultural productivity; its intensity and severity are predicted to increase in the near future. Legumes demonstrate high sensitivity…	Rejected	Review
WRKY' + 'gene express'+ 'drought stress' + ' plants'+ 'PGPR'	Google Scholar	PLANT BREEDING: Classical to Modern	Priyadarshan et al., 2019		Rejected	Book
WRKY' + 'gene express'+ 'drought stress' + ' plants'+ 'PGPR'	Google Scholar	Induced resistance to control postharvest decay of fruit and vegetables	Romanazzi et al., 2016	More than one third of harvested fruit and vegetables are lost and do not reach the customers mainly due to postharvest decay. During the last decade, several postharvest fungicides have been excluded from the market, or their allowed residues have been significantly decreased. Therefore, there is growing interest in eco-friendly and safe alternatives to synthetic fungicides. Induced resistance h…	Rejected	Review
WRKY' + 'gene express'+ 'drought stress' + ' plants'+ 'PGPR'	Google Scholar	Perspective of ACC-deaminase producing bacteria in stress agriculture	Singh et al., 2022	The 1-aminocyclopropane-1-carboxylate deaminase (ACCD) enzyme plays an important role in stress alleviation of both biotic and abiotic stressors in plants and thereby enhances their growth under harsh environmental conditions. In-depth analysis of AcdS gene encoding for ACC deaminase reveals its presence in diverse micro- organisms including bacteria and fungi. Particularly, plant growth-promotin…	Rejected	Review
WRKY' + 'gene express'+ 'drought stress' + ' plants'+ 'PGPR'	Google Scholar	Chemical elicitors of systemic acquired resistance—Salicylic acid and its functional analogs	Tripathi et al., 2019	Any interaction of plants with phytopathogens involves the generation of various chemical molecules that are critical for activation of their defense machinery. One of the chemicals, salicylic acid (SA) induces systemic acquired resistance (SAR) in plants. The activation of SAR provides a broad-spectrum resistance against a wide range of related or unrelated pathogens. There has been considerable…	Rejected	Review
WRKY' + 'gene express'+ 'drought stress' + ' plants'+ 'PGPR'	Google Scholar	A Novel Gene SbSI-2 Encoding Nuclear Protein from a Halophyte Confers Abiotic Stress Tolerance in E. coli and Tobacco	Yadav et al., 2014	Salicornia brachiata is an extreme halophyte that grows luxuriantly in coastal marshes. Previously, we have reported isolation and characterization of ESTs from Salicornia with large number of novel/unknown salt-responsive gene sequences. In this study, we have selected a novel salt-inducible gene SbSI-2 (Salicornia brachiata salt-inducible-2) for functional characterization. Bioinformatics analy…	Rejected	No PGPR
WRKY' + 'gene express'+ 'drought stress' + ' plants'+ 'PGPR'	Google Scholar	Resemblance and Difference of Seedling Metabolic and Transporter Gene Expression in High Tolerance Wheat and Barley Cultivars in Response to Salinity Stress	Zeeshan et al., 2020	To elucidate inter-specific similarity and difference of tolerance mechanism against salinity stress between wheat and barley, high tolerant wheat cv. Suntop and sensitive cv. Sunmate and tolerant barley cv. CM72 were hydroponically grown in a greenhouse with 100 mM NaCl. Glutathione, secondary metabolites, and genes associated with Na+ transport, defense, and detoxification were examined to disc…	Rejected	No PGPR
WRKY' + 'gene express'+ 'drought stress' + ' plants'+ 'PGPR'	Google Scholar	Transcription factor MYC2 is involved in priming for enhanced defense during rhizobacteria-induced systemic resistance in Arabidopsis thaliana	Pozo et al., 2008	Upon appropriate stimulation, plants can develop an enhanced capacity to express infection-induced cellular defense responses, a phenomenon known as the primed state. Colonization of the roots of Arabidopsis thaliana by the beneficial rhizobac- terial strain Pseudomonas fluorescens WCS417r primes the leaf tissue for enhanced pathogen- and insect-induced expression of jasmonate (JA)-responsive gen…	Rejected	Biotic stress
WRKY' + 'gene express'+ 'drought stress' + ' plants'+ 'PGPR'	Google Scholar	Comparative transcriptome analysis reveals the potential stimulatory mechanism of terpene trilactone biosynthesis by exogenous salicylic acid in Ginkgo biloba	Ye et al., 2020	Salicylic acid (SA) is an important endogenous signaling molecule that can not only induce disease resistance but also improve the accumulation of secondary metabolites in plants. Terpene trilactones (TTLs) are unique bioactive components of Ginkgo biloba L. and it can antagonize platelet activating factors. In this study, SA treatment could increase TTL content as well as increase several other …	Rejected	No PGPR
WRKY' + 'gene express'+ 'drought stress' + ' plants'+ 'PGPR'	Google Scholar	Transcriptional Responses of Creeping Bentgrass to 2,3-Butanediol, a Bacterial Volatile Compound (BVC) Analogue	Shi et al., 2017	Bacterial volatile compounds (BVCs) have been reported to enhance plant growth and elicit plant defenses against fungal infection and insect damage. The objective of this study was to determine transcriptomic changes in response to synthetic BVC that could be associated with plant resistance to Rhizoctonia solani in creeping bentgrass. The 2,3-butanediol (BD) (250 μM) was sprayed on creeping bent…	Rejected	No abiotic stress
WRKY' + 'gene express'+ 'drought stress' + ' plants'+ 'PGPR'	Google Scholar	Differential Regulation of Drought Responses in Two Phaseolus vulgaris Genotypes	López et al., 2020	Drought is probably the most harmful stress affecting common bean crops. Domestication, worldwide spread and local farming practices has entailed the development of a wide variety of common bean genotypes with different degrees of resistance to water stress. In this work, physiological and molecular responses to water stress have been compared in two common bean accessions, PHA-0683 and PMB-0220,…	Rejected	No PGPR
WRKY' + 'gene express'+ 'drought stress' + ' plants'+ 'PGPR'	Google Scholar	OMICS approaches towards understanding plant’s responses to counterattack heavy metal stress: An insight into molecular mechanisms of plant defense	Yadav et al., 2021	Under constant climatic change and the existing environment, plants are exposed to several adverse factors such as extreme temperatures, high salt, heavy metals (HMs), drought, and pathogens. Prolonged exposure to such adverse conditions results in phytotoxicity and overall retardation of growth and development. Excess of HMs is one of the significant factors that affects plant growth significant…	Rejected	Review
WRKY' + 'gene express'+ 'drought stress' + ' plants'+ 'PGPR'	Google Scholar	Effects of fungal volatile organic compounds on Arabidopsis thaliana growth and gene expression	Lee et al., 2019	Many microorganisms produce volatile organic compounds (VOCs) with biological effects on plants. In this study, Arabidopsis seeds or 14-day-old vegetative plants were exposed to 0.5 mg/l of chemical standards of 26 VOCs previously identified from the biocontrol fungus Trichoderma. Seven compounds (1-decene, 2-heptylfuran, 2-methyl-1-propanol, 2-methyl-1-butanol, 3-methyl-1- butanol, 2-heptanone, …	Rejected	No abiotic stress
WRKY' + 'gene express'+ 'drought stress' + ' plants'+ 'PGPR'	Google Scholar	Flagellin of Bacillus amyloliquefaciens works as a resistance inducer against groundnut bud necrosis virus in chilli (Capsicum annuum L.)	Rajamanickam et al., 2020	Groundnut bud necrosis virus (GBNV), a member of the genus Tospovirus, has an extensive host range and is associated with necrosis disease of chilli (Capsicum annuum L.), which is a major threat to commercial production. Plant growth pro- moting rhizobacteria (PGPR) have been investigated for their antiviral activity in several crops and for their potential use in viral disease management. Howeve…	Rejected	Biotic stress
WRKY' + 'gene express'+ 'drought stress' + ' plants'+ 'PGPR'	Google Scholar	Understanding the role of miRNAs for improvement of tea quality and stress tolerance	Krishnatreya et al., 2021	MicroRNAs (miRNAs) are an emerging class of small non-coding RNAs that exhibit important role in regulation of gene expression, mostly through the mechanism of cleavage and/or inhibition of translation of target mRNAs during or after transcription. Although much has been unravelled about the role of miRNAs in diverse biological processes like maintenance of functional integrity of genes and genom…	Rejected	Review
WRKY' + 'gene express'+ 'drought stress' + ' plants'+ 'PGPR'	Google Scholar	Transcriptome and Metabolome Reprogramming in Tomato Plants by Trichoderma harzianum strain T22 Primes and Enhances Defense Responses Against Aphids	Gutierrez et al., 2019	Beneficial fungi in the genus Trichoderma are among the most widespread biocontrol agents of plant pathogens. Their role in triggering plant defenses against pathogens has been intensely investigated, while, in contrast, very limited information is available on induced barriers active against insects. The growing experimental evidence on this latter topic looks promising, and paves the way toward…	Rejected	Biotic stress
WRKY' + 'gene express'+ 'drought stress' + ' plants'+ 'PGPR'	Google Scholar	Sniffing bacterial volatile compounds for healthier plants	Sharifi et al., 2018	Bacterial volatile compounds (BVCs) are not waste or by- products of primary metabolism but rather have critical roles in the biology and ecological competence of bacteria. BVCs are exploited as a source of nutrients and information in plant– bacteria interactions. They target key points in plant physiology, activating downstream metabolic pathways by a domino effect. BVCs are an ancient signal a…	Rejected	Review
WRKY' + 'gene express'+ 'drought stress' + ' plants'+ 'PGPR'	Google Scholar	Global gene expression profiling of two switchgrass cultivars following inoculation with Burkholderia phytofirmans strain PsJN	Lara-Chavez et al., 2015	Improvement and year-to-year stabilization of biomass yields are primary objectives for the development of a low-input switchgrass feedstock production system using microbial endophytes. An earlier investigation of the effect of Burkholderia phytofirmans strain PsJN on switchgrass germplasm demonstrated differential responses between genotypes. PsJN inoculation of cv. Alamo (lowland ecotype) incr…	Rejected	No abiotic stress
WRKY' + 'gene express'+ 'drought stress' + ' plants'+ 'PGPR'	Google Scholar	Balancing defense and growth—Analyses of the beneficial symbiosis between Piriformospora indica and Arabidopsis thaliana	Nongbri et al., 2012	The mutualistic interaction between the endophytic and root-colonizing fungus Piriformospora indica and Arabidopsis thaliana is a nice model system to study beneficial and non-benefical traits in a symbiosis. Colonized Arabidopsis plants are taller, produce more seeds and are more resistant against biotic and abiotic stress. Based on genetic, molecular and cellular analyses, Arabidopsis mutants w…	Rejected	No abiotic stress
WRKY' + 'gene express'+ 'drought stress' + ' plants'+ 'PGPR'	Google Scholar	Salinity responses and tolerance mechanisms in underground vegetable crops: an integrative review	Chourasia et al., 2022	Underground vegetables are the source of healthy carbohydrates, resistant starch, antioxidants, vitamins, mineral, and nutrients which benefit human health. Soil salinity is a serious threat to agriculture that severely affects the growth, development, and productivity of underground vegetable crops. Salt stress induces several morphological, anatomical, physiological, and biochemical changes in …	Rejected	Review
WRKY' + 'gene express'+ 'drought stress' + ' plants'+ 'PGPR'	Google Scholar	Genome-wide identification, evolution and expression analysis of cyclic nucleotide-gated channels in tobacco (Nicotiana tabacum L.)	Nawaz et al., 2019	Tobacco (Nicotiana tabacum) serve as the top leading commercial, non-food, and model crop worldwide. Cyclic nucleotide-gated channels (CNGCs) are ligand-gated, calcium-permeable, divalent, cation-selective channels, involved in important biological functions. Here, we systematically characterized thirty-five CNGC genes in the genome of Nicotiana tabacum, and classified into four phylogenetic grou…	Rejected	No PGPR
WRKY' + 'gene express'+ 'drought stress' + ' plants'+ 'PGPR'	Google Scholar	Implications of Abscisic Acid in the Drought Stress Tolerance of Plants	Ali et al., 2020	Drought is a severe environmental constraint, which significantly affects plant growth, productivity, and quality. Plants have developed specific mechanisms that perceive the stress signals and respond to external environmental changes via different mitigation strategies. Abscisic acid (ABA), being one of the phytohormones, serves as an important signaling mediator for plants’ adaptive response t…	Rejected	Review
WRKY' + 'gene express'+ 'drought stress' + ' plants'+ 'PGPR'	Google Scholar	Molecular insights into the jasmonate signaling and associated defense responses against wilt caused by Fusarium oxysporum	Fernandes et al., 2022	Biotic and abiotic stress factors drastically limit plant growth and development as well as alter the physiological, biochemical and cellular processes. This negatively impacts plant productivity, ultimately leading to agricultural and economical loss. Plant defense mechanisms elicited in response to these stressors are crucially regulated by the intricate crosstalk between defense hormones such …	Rejected	Biotic stress
WRKY' + 'gene express'+ 'drought stress' + ' plants'+ 'PGPR'	Google Scholar	Interaction between Humic Substances and Plant Hormones for Phosphorous Acquisition	Jindo et al., 2020	Phosphorus (P) deficiency is a major constraint in highly weathered tropical soils. Although phosphorous rock reserves may last for several hundred years, there exists an urgent need to research efficient P management for sustainable agriculture. Plant hormones play an important role in regulating plant growth, development, and reproduction. Humic substances (HS) are not only considered an essent…	Rejected	Review
WRKY' + 'gene express'+ 'drought stress' + ' plants'+ 'PGPR'	Google Scholar	Molecular mechanism of mulberry response to drought stress revealed by complementary transcriptomic and iTRAQ analyses	Li et al., 2022	Background: The use of mulberry leaves has long been limited to raising silkworms, but with the continuous improvement of mulberry (Morus alba) resource development and utilization, various mulberry leaf extension prod- ucts have emerged. However, the fresh leaves of mulberry trees have a specific window of time for picking and are susceptible to adverse factors, such as drought stress. Therefore…	Rejected	No PGPR
WRKY' + 'gene express'+ 'drought stress' + ' plants'+ 'PGPR'	Google Scholar	Plants under Stress: Involvement of Auxin and Cytokinin	Bielach et al., 2017	Plant growth and development are critically influenced by unpredictable abiotic factors. To survive fluctuating changes in their environments, plants have had to develop robust adaptive mechanisms. The dynamic and complementary actions of the auxin and cytokinin pathways regulate a plethora of developmental processes, and their ability to crosstalk makes them ideal candidates for mediating stress…	Rejected	review
WRKY' + 'gene express'+ 'drought stress' + ' plants'+ 'PGPR'	Google Scholar	AHL-priming functions via oxylipin and salicylic acid	Hartmann et al., 2015	Collaborative action between the host plant and associated bacteria is crucial for the establishment of an efficient interaction. In bacteria, the synchronized behavior of a population is often achieved by a density-dependent communication called quorum sensing. This behavior is based on signaling molecules, which influence bacterial gene expression. N -acyl homoserine lactones (AHLs) are such mo…	Rejected	Review
WRKY' + 'gene express'+ 'drought stress' + ' plants'+ 'PGPR'	Google Scholar	Unraveling the Molecular Basis of Bacillus Megaterium Interactions in Rice for Plant Growth Promotion Through Proteomics and Gene Expression	Prabhukarthikeyan et al., 2022	In this study, we evaluated the efficacy of Bacillus strains for plant growth promotional activities under in vitro and in vivo conditions. The results indicated that Bacillus megaterium BS11 was superior in enhancing the plant growth and yield of rice plants compared to other Bacillus strains. Currently, there is no information available on the molecular mechanism of Rice– B. megaterium interact…	Rejected	No abiotic stress
WRKY' + 'gene express'+ 'drought stress' + ' plants'+ 'PGPR'	Google Scholar	Heavy Metal Stress, Signaling, and Tolerance Due to Plant-Associated Microbes: An Overview	Tiwari et al., 2018	Several anthropogenic activities including mining, modern agricultural practices, and industrialization have long-term detrimental effect on our environment. All these factors lead to increase in heavy metal concentration in soil, water, and air. Soil contamination with heavy metals cause several environmental problems and imparts toxic effect on plant as well as animals. In response to these adv…	Rejected	Review
WRKY' + 'gene express'+ 'drought stress' + ' plants'+ 'PGPR'	Google Scholar	Efficiency of microbial bio-agents as elicitors in plant defense mechanism under biotic stress: A review	Zehra et al., 2021	Numerous harmful microorganisms and insect pests have the ability to cause plant infections or damage, which is mostly controlled by toxic chemical agents. These chemical compounds and their derivatives exhibit hazardous effects on habitats and human life too. Hence, there’s a need to develop novel, more effective and safe bio-control agents. A variety of microbes such as viruses, bacteria, and f…	Rejected	Review
WRKY' + 'gene express'+ 'drought stress' + ' plants'+ 'PGPR'	Google Scholar	Microbes and Signaling Biomolecules Against Plant Stress Strategies of Plant- Microbe Relationships for Better Survival	Singh et al., 2021		Rejected	Book
WRKY' + 'gene express'+ 'drought stress' + ' plants'+ 'PGPR'	Google Scholar	Interactional mechanisms of Paenibacillus polymyxa SC2 and pepper (Capsicum annuum L.) suggested by transcriptomics	Liu et al., 2021	Background: Paenibacillus polymyxa SC2, a bacterium isolated from the rhizosphere soil of pepper (Capsicum annuum L.), promotes growth and biocontrol of pepper. However, the mechanisms of interaction between P. polymyxa SC2 and pepper have not yet been elucidated. This study aimed to investigate the interactional relationship of P. polymyxa SC2 and pepper using transcriptomics. Results: P. polymy…	Rejected	No abiotic stress
WRKY' + 'gene express'+ 'drought stress' + ' plants'+ 'PGPR'	Google Scholar	RNA-seq analysis revealed key genes associated with salt tolerance in rapeseed germination through carbohydrate metabolism, hormone, and MAPK signaling pathways	Mohamed et al., 2022	Seedling survival, growth, and yield are highly associated with seed germination performance. Germination of rapeseed differs under NaCl stress among cultivars, but the molecular mechanism of salinity tolerance in rape- seed is poorly understood. In the current study, in contrast to the trend of the hydrogen peroxide level, the activities of superoxide dismutase, catalase, and ascorbate peroxidas…	rejected	No PGPR
WRKY' + 'gene express'+ 'drought stress' + ' plants'+ 'PGPR'	Google Scholar	Amino Acid and Carbohydrate Metabolism Are Coordinated to Maintain Energetic Balance during Drought in Sugarcane	Diniz et al., 2020	The ability to expand crop plantations without irrigation is a major goal to increase agriculture sustainability. To achieve this end, we need to understand the mechanisms that govern plant growth responses under drought conditions. In this study, we combined physiological, transcriptomic, and genomic data to provide a comprehensive picture of drought and recovery responses in the leaves and root…	Rejected	No PGPR
WRKY' + 'gene express'+ 'drought stress' + ' plants'+ 'PGPR'	Google Scholar	Trichoderma/pathogen/plant interaction in pre-harvest food security	Silva et al., 2019	Large losses before crop harvesting are caused by plant pathogens, such as viruses, bacteria, oomycetes, fungi, and nematodes. Among these, fungi are the major cause of losses in agriculture worldwide. Plant pathogens are still controlled through application of agrochemicals, causing human disease and impacting environmental and food security. Biological control provides a safe alternative for th…	Rejected	Review
WRKY' + 'gene express'+ 'drought stress' + ' plants'+ 'PGPR'	Google Scholar	Enhancement of Pathogen Resistance in Common Bean Plants by Inoculation With Rhizobium etli	Díaz-Valle et al., 2019	Symbiotic Rhizobium-legume associations are mediated by exchange of chemical signals that eventually result in the development of a nitrogen-fixing nodule. Such signal interactions are thought to be at the center of the plants’ capacity either to activate a defense response or to suppress the defense response to allow colonization by symbiotic bacteria. In addition, the colonization of plant root…	Rejected	Review
WRKY' + 'gene express'+ 'drought stress' + ' plants'+ 'PGPR'	Google Scholar	Role of nitric oxide in drought stress	Ullah et al., 2022		Rejected	Chapter book
WRKY' + 'gene express'+ 'drought stress' + ' plants'+ 'PGPR'	Google Scholar	Overdominance at the Gene Expression Level Plays a Critical Role in the Hybrid Root Growth of Brassica napus	Shalby et al., 2021	Despite heterosis contributing to genetic improvements in crops, root growth heterosis in rapeseed plants is poorly understood at the molecular level. The current study was performed to discover key differentially expressed genes (DEGs) related to heterosis in two hybrids with contrasting root growth performance (FO; high hybrid and FV; low hybrid) based on analysis of the root heterosis effect. …	Rejected	No PGPR
WRKY' + 'gene express'+ 'drought stress' + ' plants'+ 'PGPR'	Google Scholar	Jasmonates: biosynthesis, perception, signal transduction and action in plant stress response, growth and development. An update to the 2007 review in Annals of Botany	Wasternack et al., 2011	† Background Jasmonates are important regulators in plant responses to biotic and abiotic stresses as well as in development. Synthesized from lipid-constituents, the initially formed jasmonic acid is converted to different metabolites including the conjugate with isoleucine. Important new components of jasmonate signalling includ- ing its receptor were identified, providing deeper insight into t…	Rejected	Review
WRKY' + 'gene express'+ 'drought stress' + ' plants'+ 'PGPR'	Google Scholar	Calcium‐dependent protein kinase 2 plays a positive role in the salt stress response in potato	Grossi et al., 2022	The salinity of soils affects plant development and is responsible for great losses in crop yields. Calcium-dependent protein kinases (CDPKs) are sensor–transducers that decode Ca2+ signatures triggered by abiotic stimuli and translate them into physiological responses. Histochemical analyses of potato plants harboring StCDPK2 promoter fused to the reporter gene β-glucuronidase (ProStCDPK2:GUS) r…	Rejected	No PGPR
WRKY' + 'gene express'+ 'drought stress' + ' plants'+ 'PGPR'	Google Scholar	Microscopic and molecular studies in the biological control of rice blast caused by Pyricularia oryzae with Bacillus sp. BMH under greenhouse conditions	Koné et al., 2022	Rice (Oryza sativa L.) feeds around half of humanity mainly in Asia, South America, and Africa. Pyricularia oryzae Cav. (syn. Magnaporthe oryzae Couch) is the causative agent of the most devastating disease of rice worldwide. The purpose of this study was to evaluate the efficiency of the selected Bacillus sp. strain BMH in relation to its antagonistic attributes against P. oryzae as well as rice…	Rejected	Biotic stress
WRKY' + 'gene express'+ 'drought stress' + ' plants'+ 'PGPR'	Google Scholar	Piriformospora indica-primed transcriptional reprogramming induces defense response against early blight in tomat	Panda et al., 2019	Piriformospora indica is an adaptable mycorrhiza-like fungus belonging to the Sebacinales order that can colonize roots of a wide range of plant species. Studies have shown that P. indica improves growth and enhances systemic defense against pathogens in host plants. However, the mechanism(s) through which these effects occur remain unclear. Therefore to gain more insight into the molecular basis…	Rejected	Biotic stress
WRKY' + 'gene express'+ 'drought stress' + ' plants'+ 'PGPR'	Google Scholar	Transcriptional responses of soybean roots to colonization with the root endophytic fungus Piriformospora indica reveals altered phenylpropanoid and secondary metabolism	Bajaj et al., 2017	Piriformospora indica, a root endophytic fungus, has been shown to enhance biomass production and confer tolerance to various abiotic and biotic stresses in many plant hosts. A growth chamber experiment of soybean (Glycine max) colonized by P. indica compared to uninoculated control plants showed that the fungus significantly increased shoot dry weight, nutrient content, and rhizobial biomass. RN…	Rejected	Fungi
WRKY' + 'gene express'+ 'drought stress' + ' plants'+ 'PGPR'	Google Scholar	Probiotics and Plant Health	Ali et al.,		Rejected	Book
WRKY' + 'gene express'+ 'drought stress' + ' plants'+ 'PGPR'	Google Scholar	A Comprehensive Review on Chickpea (Cicer arietinum L.) Breeding for Abiotic Stress Tolerance and Climate Change Resilience	Arriagada et al., 2022	Chickpea is one of the most important pulse crops worldwide, being an excellent source of protein. It is grown under rain-fed conditions averaging yields of 1 t/ha, far from its potential of 6 t/ha under optimum conditions. The combined effects of heat, cold, drought, and salinity affect species productivity. In this regard, several physiological, biochemical, and molecular mechanisms are reviewe…	Rejected	Review
WRKY' + 'gene express'+ 'drought stress' + ' plants'+ 'PGPR'	Google Scholar	Volatile organic compounds mediated plant-microbe interactions in soil	Raza et al., 2020		Rejected	Chapter book
WRKY' + 'gene express'+ 'drought stress' + ' plants'+ 'PGPR'	Google Scholar	Transcriptome Analysis Reveals Candidate Genes involved in Blister Blight defense in Tea (Camellia sinensis (L) Kuntze)	Jayaswall et al., 2016	To unravel the molecular mechanism of defense against blister blight (BB) disease caused by an obligate biotrophic fungus, Exobasidium vexans, transcriptome of BB interaction with resistance and susceptible tea genotypes was analysed through RNA-seq using Illumina GAIIx at four different stages during ~20-day disease cycle. Approximately 69 million high quality reads were assembled de novo, yield…	Rejected	Review
WRKY' + 'gene express'+ 'drought stress' + ' plants'+ 'PGPR'	Google Scholar	Comparison of Drought and Heat Resistance Strategies among Six Populations of Solanum chilense and Two Cultivars of Solanum lycopersicum	Blanchard-Gros et al., 2021	Within the tomato clade, Solanum chilense is considered one of the most promising sources of genes for tomato (S. lycopersicum) selection to biotic and abiotic stresses. In this study, we compared the effects of drought, high temperature, and their combination in two cultivars of S. lycopersicum and six populations of S. chilense, differing in their local habitat. Plants were grown at 21/19 ◦C or…	Rejected	No PGPR
WRKY' + 'gene express'+ 'drought stress' + ' plants'+ 'PGPR'	Google Scholar	An endophyte from salt-adapted pokkali rice confers salt-tolerance to a salt-sensitive rice variety and targets a unique pattern of genes in its new host	Sampangi-Ramaiah et al., 2020	Endophytes, both of bacterial and fungal origin, are ubiquitously present in all plants. While their origin and evolution are enigmatic, there is burgeoning literature on their role in promoting growth and stress responses in their hosts. We demonstrate that a salt-tolerant endophyte isolated from salt-adapted Pokkali rice, a Fusarium sp., colonizes the salt-sensitive rice variety IR-64, promotes…	Rejected	No PGPR
WRKY' + 'gene express'+ 'drought stress' + ' plants'+ 'PGPR'	Google Scholar	Control of stem-rot disease of rice caused by Sclerotium oryzae catt and its cellular defense mechanism – A review	Ghosh et al., 2020	Rice serves as a source of livelihood to millions of people as staple food. Stem rot of rice caused by Sclerotium oryzae has been an agriculturally significant disease cause about 35% of crop loss. This review dealt with stem rot management strategies applying various agronomic practices. Control of stem rot using fungicide leads to environmental hazour along with its residual effect on human hea…	Rejected	Review
WRKY' + 'gene express'+ 'drought stress' + ' plants'+ 'PGPR'	Google Scholar	The Evolution of Ethylene Signaling in Plant Chemical Ecology	Groen et al., 2014	Ethylene is a key hormone in plant development, mediating plant responses to abiotic environmental stress, and interactions with attackers and mutualists. Here, we provide a synthesis of the role of ethylene in the context of plant ecology and evolution, and a prospectus for future research in this area. We focus on the regulatory function of ethylene in multi- organismal interactions. In general…	Rejected	Review
WRKY' + 'gene express'+ 'drought stress' + ' plants'+ 'PGPR'	Google Scholar	Seed Biopriming with Microbial Inoculant Triggers Local and Systemic Defense Responses against Rhizoctonia solani Causing Banded Leaf and Sheath Blight in Maize (Zea mays L.)	Singh et al., 2020	Plant growth promoting rhizobacteria Pseudomonas aeruginosa strain MF-30 isolated from maize rhizosphere was characterized for several plant growth stimulating attributes. The strain MF-30 was also evaluated for antifungal properties against Rhizoctonia solani causing banded leaf and sheath blight in maize (Zea mays L.) under in vitro conditions and was found to have higher mycelial growth suppre…	Rejected	Biotic stress
WRKY' + 'gene express'+ 'drought stress' + ' plants'+ 'PGPR'	Google Scholar	Piriformospora indica Primes Onion Response against Stemphylium Leaf Blight Disease	Roylawar et al., 2021	The root-endophytic fungus Piriformospora indica (=Serendipita indica) has been revealed for its growth-promoting effects and its capacity to induce resistance in a broad spectrum of host plants. However, the bioefficacy of this fungus had not yet been tested against any pathogen affecting onion (Allium cepa). In this study, the biocontrol potency of P. indica against onion leaf blight, an impact…	Rejected	Biotic stress
WRKY' + 'gene express'+ 'drought stress' + ' plants'+ 'PGPR'	Google Scholar	Heavy metal and metalloid toxicity in horticultural plants: Tolerance mechanism and remediation strategies	Noor et al., 2022	Heavy metal/metalloids (HMs) are among the primary soil pollutants that limit crop production worldwide. Plants grown in HM contaminated soils exhibit reduced growth and development, resulting in a decrease in crop production. The exposure to HMs induces plant oxidative stress due to the formation of free radicals, which alter plant morphophysiological and biochemical mechanisms at cellular and t…	Rejected	Review
WRKY' + 'gene express'+ 'drought stress' + ' plants'+ 'PGPR'	Google Scholar	Effects, tolerance mechanisms and management of salt stress in grain legumes	Farooq et al., 2017	Salt stress is an ever-present threat to crop yields, especially in countries with irrigated agriculture. Efforts to improve salt tolerance in crop plants are vital for sustainable crop production on marginal lands to ensure future food supplies. Grain legumes are a fascinating group of plants due to their high grain protein contents and ability to fix biological nitrogen. However, the accumulati…	Rejected	Review
WRKY' + 'gene express'+ 'drought stress' + ' plants'+ 'PGPR'	Google Scholar	Signaling and Communication in Plants	Sarkar et al., 2021		Rejected	Book
WRKY' + 'gene express'+ 'drought stress' + ' plants'+ 'PGPR'	Google Scholar	Transcription factors WRKY70 and WRKY11 served as regulators in rhizobacterium Bacillus cereus AR156-induced systemic resistance to Pseudomonas syringae pv. tomato DC3000 in Arabidopsis	Jiang et al., 2016	The activation of both the SA and JA/ETsignalling pathways may lead to more efficient general and broad resistance to Pst DC3000 by non-pathogenic rhizobacteria. However, the mechanisms that govern this simultaneous activation are unclear. Using Arabidopsis as a model system, two transcription factors, WRKY11 and WRKY70, were identi- fied as important regulators involved in Induced Systemic Resis…	Rejected	Biotic stress
WRKY' + 'gene express'+ 'drought stress' + ' plants'+ 'PGPR'	Google Scholar	Grain Legumes and Fear of Salt Stress: Focus on Mechanisms and Management Strategies	Nadeem et al., 2019	Salinity is an ever-present major constraint and a major threat to legume crops, particularly in areas with irrigated agriculture. Legumes demonstrate high sensitivity, especially during vegetative and reproductive phases. This review gives an overview of legumes sensitivity to salt stress (SS) and mechanisms to cope with salinity stress under unfavorable conditions. It also focuses on the promis…	Rejected	Review
WRKY' + 'gene express'+ 'drought stress' + ' plants'+ 'PGPR'	Google Scholar	Deciphering the plant microbiome to improve drought tolerance: Mechanisms and perspectives	Ali et al., 2022	Plants being sessile are constantly challenged by numerous abiotic stressors that jeopardize their survival. Drought stress is a major constraint in sustainable agriculture that affects plant distribution, growth, and pro- ductivity. Plants use multidimensional adaptation tactics at cellular, molecular, and biochemical levels to combat drought stress. These adaptive strategies have been extensive…	Rejected	Review
WRKY' + 'gene express'+ 'drought stress' + ' plants'+ 'PGPR'	Google Scholar	Impacts, Tolerance, Adaptation, and Mitigation of Heat Stress on Wheat under Changing Climates	Yadav et al., 2022	Heat stress (HS) is one of the major abiotic stresses affecting the production and quality of wheat. Rising temperatures are particularly threatening to wheat production. A detailed overview of morpho-physio-biochemical responses of wheat to HS is critical to identify various tolerance mechanisms and their use in identifying strategies to safeguard wheat production under changing climates. The de…	Rejected	Review
WRKY' + 'gene express'+ 'drought stress' + ' plants'+ 'PGPR'	Google Scholar	Unravelling the multi‐faceted regulatory role of polyamines in plant biotechnology, transgenics and secondary metabolomics	Nandy et al., 2022	Polyamines (PAs) are ubiquitous low-molecular-weight, aliphatic compounds with wide as well as complex application in fundamental areas of plant growth and development. PAs are mediator of basic metabolism of organisms which include cell division and differentiation, biotic and abiotic stress tolerance, reversal of oxidative damage, stabilization of nucleic acids, and protein and phospholipid bin…	Rejected	Review
WRKY' + 'gene express'+ 'drought stress' + ' plants'+ 'PGPR'	Google Scholar	Microorganisms for Sustainability	Khan et al., 2019		Rejected	Book
WRKY' + 'gene express'+ 'drought stress' + ' plants'+ 'PGPR'	Google Scholar	Review: Biological functions of major latex-like proteins in plants	Fujita et al., 2021	Major latex-like proteins (MLPs) have been identified in dicots and monocots. They are members of the birch pollen allergen Bet v 1 family as well as pathogenesis-related proteins class 10. MLPs have two main features. One is binding affinity toward various hydrophobic compounds, such as long-chain fatty acids, steroids, and systemic acquired resistance signals, via its internal hydrophobic cavit…	Rejected	Review
WRKY' + 'gene express'+ 'drought stress' + ' plants'+ 'PGPR'	Google Scholar	Jasmonic Acid Signaling and Molecular Crosstalk with Other Phytohormones	Liu et al., 2021	Plants continually monitor their innate developmental status and external environment and make adjustments to balance growth, differentiation and stress responses using a complex and highly interconnected regulatory network composed of various signaling molecules and regulatory proteins. Phytohormones are an essential group of signaling molecules that work through a variety of different pathways …	Rejected	Review
WRKY' + 'gene express'+ 'drought stress' + ' plants'+ 'PGPR'	Google Scholar	Sustainable Agriculture Reviews 51 Legume Agriculture and Biotechnology Vol 2	Furlan et al., 2021		Rejected	Book
WRKY' + 'gene express'+ 'drought stress' + ' plants'+ 'PGPR'	Google Scholar	An overview of recent advancement in phytohormones-mediated stress management and drought tolerance in crop plants	Chhaya et al., 2021	Plants face a continuous threat of abiotic stresses under the changing environment. Because of climate change, water scarcity has been shown to be a significant environmental constraint on plant productivity. Droughts in particular have been shown to affect plant growth and development, lead to alteration in quality and quantity of crop production, and result in global food insecurity. Phytohormo…	Rejected	Review
WRKY' + 'gene express'+ 'drought stress' + ' plants'+ 'PGPR'	Google Scholar	Surviving in a Hostile World: Plant Strategies to Resist Pests and Diseases	Wilkinson et al., 2019	As primary producers, plants are under constant pressure to defend them- selves against potentially deadly pathogens and herbivores. In this review, we describe short- and long-term strategies that enable plants to cope with these stresses. Apart from internal immunological strategies that involve physio- logical and (epi)genetic modifications at the cellular level, plants also employ external st…	Rejected	Review
WRKY' + 'gene express'+ 'drought stress' + ' plants'+ 'PGPR'	Google Scholar	Secondary Metabolites of Plant Growth Promoting Rhizomicroorganisms Discovery and Applications	Mohammadipanah et al., 2019		Rejected	Book
WRKY' + 'gene express'+ 'drought stress' + ' plants'+ 'PGPR'	Google Scholar	Transcriptomic changes in the root of oil palm (Elaeis guineensis Jacq.) upon inoculation with Bacillus sphaericus UPMB10	Lim et al., 2010	Plant growth-promoting bacteria (PGPB) pro- mote plant growth through a combination of mechanisms which affect mineral nutrition and root development. In this study, we profiled the transcripts in oil palm roots inoculated with a PGPB, Bacillus sphaericus UPMB10, upon the establishment of a stable inoculum on the root surface by cDNA microarray analysis. A total of 70 from more than 3,700 transcr…	Rejected	Review
WRKY' + 'gene express'+ 'drought stress' + ' plants'+ 'PGPR'	Google Scholar	Crop Improvement Sustainability Through Leading-Edge Technology	Nadarajah et al., 2017		Rejected	Book
WRKY' + 'gene express'+ 'drought stress' + ' plants'+ 'PGPR'	Google Scholar	Molecular mechanism of drought tolerance in wheat	Zahoor et al., 2020		Rejected	Chapter book
WRKY' + 'gene express'+ 'drought stress' + ' plants'+ 'PGPR'	Google Scholar	Genetic Resources of Chili Pepper (Capsicum annuum L.) against Phytophthora capsici and Their Induction through Various Biotic and Abiotic Factors	Majid et al., 2017	Phytophthora capsici is the most destructive pathogen of vegetables that has blown a serious threat to chili pepper plants. We discussed the control of Phytophthora capsici through manipulation of genetic architecture of chili plant. Various genes encoding transcriptional regulatory and defense related putative pro- teins such as pathogen-related protein (PR), Anti-Microbial peptides (AMPs), Poly…	Rejected	Review
WRKY' + 'gene express'+ 'drought stress' + ' plants'+ 'PGPR'	Google Scholar	Molecular insights into biochar‐mediated plant growth promotion and systemic resistance in tomato against fusarium crown and root rot disease	Jaiswal et al., 2020	Molecular mechanisms associated with biochar‐elicited suppression of soilborne plant diseases and improved plant performance are not well understood. A stem base inoculation approach was used to explore the ability of biochar to induce systemic resistance in tomato plants against crown rot caused by a soilborne pathogen, Fusarium oxysporum f. sp. radicis lycopersici. RnA‐seq transcriptome profili…	Rejected	Biotic stress
WRKY' + 'gene express'+ 'drought stress' + ' plants'+ 'PGPR'	Google Scholar	Proanthocyanidins Alleviate Cadmium Stress in Industrial Hemp (Cannabis sativa L.)	Yin et al., 2022	Industrial hemp (Cannabis sativa L.), an annual herbaceous cash crop, is widely used for the remediation of heavy metal-contaminated soils due to its short growth cycle, high tolerance, high biomass, and lack of susceptibility to transfer heavy metals into the human food chain. In this study, a significant increase in proanthocyanidins was found in Yunnan hemp no. 1 after cadmium stress. Proantho…	Rejected	No PGPR
WRKY' + 'gene express'+ 'drought stress' + ' plants'+ 'PGPR'	Google Scholar	Genes and Transcriptional Factors in Chili Plant with Aspect to Metabolism and Resistance against Virus, Bacteria and Fungi: A Review	Ali et al., 2014	These days, there is a lot of discussion about genetically modified plants. There are different schools of thoughts in public, and some people adjusted while others are reluctant to accept genetically modified organism foods. Many vegetables are transformed and are used in daily life. Chili is one of those which is genetically modified and used in our food. Race specific genes can be used more ef…	Rejected	Review
WRKY' + 'gene express'+ 'drought stress' + ' plants'+ 'PGPR'	Google Scholar	Plant Ecophysiology and Adaptation under Climate Change: Mechanisms and Perspectives II Mechanisms of Adaptation and Stress Amelioration	Poltronieri et al., 2020		Rejected	Book
WRKY' + 'gene express'+ 'drought stress' + ' plants'+ 'PGPR'	Google Scholar	Principles and Practices of OMICS and Genome Editing for Crop Improvement	Prakash		Rejected	Book
WRKY' + 'gene express'+ 'drought stress' + ' plants'+ 'PGPR'	Google Scholar	New Insights into Bacillus-Primed Plant Responses to a Necrotrophic Pathogen Derived from the Tomato- Botrytis Pathosystem	Morales et al., 2022	Induced systemic resistance (ISR) is one of the most studied mechanisms of plant–microbe interaction and is considered a very promising alternative for integrated pest management programs. In our study, we explored the plant defense response induced by Bacillus velezensis BBC047 in relation to its application before or after Botrytis cinerea infection of tomato plants. The inoculation of BBC047 d…	Rejected	Biotic stress
WRKY' + 'gene express'+ 'drought stress' + ' plants'+ 'PGPR'	Google Scholar	The Role of Plant Hormones in the Interaction of Colletotrichum Species with Their Host Plants	Svoboda et al., 2021	Colletotrichum is a plant pathogenic fungus which is able to infect virtually every econom- ically important plant species. Up to now no common infection mechanism has been identified comparing different plant and Colletotrichum species. Plant hormones play a crucial role in plant- pathogen interactions regardless whether they are symbiotic or pathogenic. In this review we analyze the role of eth…	Rejected	Review
WRKY' + 'gene express'+ 'drought stress' + ' plants'+ 'PGPR'	Google Scholar	Antibacterial Potential of Bacillus amyloliquefaciens GJ1 against Citrus Huanglongbing	Nan et al., 2021	Citrus huanglongbing (HLB) is a destructive disease caused by Candidatus Liberibacter species and is a serious global concern for the citrus industry. To date, there is no established strategy for control of this disease. Previously, Bacillus amyloliquefaciens GJ1 was screened as the biocontrol agent against HLB. In this study, two-year-old citrus infected by Ca. L. asiaticus were treated with B.…	Rejected	Biotic stress
WRKY' + 'gene express'+ 'drought stress' + ' plants'+ 'PGPR'	Google Scholar	Plants’ Physio-Biochemical and Phyto-Hormonal Responses to Alleviate the Adverse Effects of Drought Stress: A Comprehensive Review	Wahab et al., 2022	Water, a necessary component of cell protoplasm, plays an essential role in supporting life on Earth; nevertheless, extreme changes in climatic conditions limit water availability, causing numerous issues, such as the current water-scarce regimes in many regions of the biome. This review aims to collect data from various published studies in the literature to understand and critically analyze pla…	Rejected	Review
WRKY' + 'gene express'+ 'drought stress' + ' plants'+ 'PGPR'	Google Scholar	Genetic Responses Induced in Olive Roots upon Colonization by the Biocontrol Endophytic Bacterium Pseudomonas fluorescens PICF7	Schiliro et al., 2012	Knowledge on the genetic basis underlying interactions between beneficial bacteria and woody plants is still very limited, and totally absent in the case of olive. We aimed to elucidate genetic responses taking place during the colonization of olive roots by the native endophyte Pseudomonas fluorescens PICF7, an effective biocontrol agent against Verticillium wilt of olive. Roots of olive plants …	Rejected	Biotic stress
WRKY' + 'gene express'+ 'drought stress' + ' plants'+ 'PGPR'	Google Scholar	Large scale transcriptome analysis reveals interplay between development of forest trees and a beneficial mycorrhiza helper bacterium	Kurth et al. 2015	Background: Pedunculate oak, Quercus robur is an abundant forest tree species that hosts a large and diverse community of beneficial ectomycorrhizal fungi (EMFs), whereby ectomycorrhiza (EM) formation is stimulated by mycorrhiza helper bacteria such as Streptomyces sp. AcH 505. Oaks typically grow rhythmically, with alternating root flushes (RFs) and shoot flushes (SFs). We explored the poorly un…	Rejected	No abiotic stress
WRKY' + 'gene express'+ 'drought stress' + ' plants'+ 'PGPR'	Google Scholar	OPT gene family analysis of potato (Solanum tuberosum) responding to heavy metal stress: Comparative omics and co-expression networks revealed the underlying core templates and specific response patterns	Wu et al., 2021	Oligopeptides transporter (OPT) can maintain intracellular metal homeostat, however, their evolutionary characteristics, as well as their expression patterns in heavy metal exposure, remain unclear. Compared with previous OPT family identification, we identified 94 OPT genes (including 21 in potato) in potato and 4 other plants by HMMER program based on OPT domain (PF03169) for the first time. Se…	Rejected	No PGPR
WRKY' + 'gene express'+ 'drought stress' + ' plants'+ 'PGPR'	Google Scholar	Phytohormones Producing Acinetobacter bouvetii P1 Mitigates Chromate Stress in Sunflower by Provoking Host Antioxidant Response	Qadir et al., 2021	Different physical and chemical techniques are used for the decontamination of Cr+6 con- taminated sites. The techniques are expensive, laborious, and time-consuming. However, remediation of Cr+6 by microbes is viable, efficient, and cost-effective. In this context, plant growth-promoting rhizobacteria Acinetobacter bouvetii P1 isolated from the industrial zone was tested for its role in relievin…	Rejected	No WRKY
WRKY' + 'gene express'+ 'drought stress' + ' plants'+ 'PGPR'	Google Scholar	Transcriptome Analysis in Chinese Cabbage (Brassica rapa ssp. pekinensis) Provides the Role of Glucosinolate Metabolism in Response to Drought Stress	Eom et al., 2018	Although drought stress is one of the most limiting factors in growth and production of Chinese cabbage (Brassica rapa L. ssp. pekinensis), the underlying biochemical and molecular causes are poorly understood. In the present study, to address the mechanisms underlying the drought responses, we analyzed the transcriptome profile of Chinese cabbage grown under drought conditions. Drought stress tr…	Rejected	No PGPR
WRKY' + 'gene express'+ 'drought stress' + ' plants'+ 'PGPR'	Google Scholar	Drought Stress in Grain Legumes: Effects, Tolerance Mechanisms and Management	Khatun et al., 2021	Grain legumes are important sources of proteins, essential micronutrients and vitamins and for human nutrition. Climate change, including drought, is a severe threat to grain legume production throughout the world. In this review, the morpho-physiological, physio-biochemical and molecular levels of drought stress in legumes are described. Moreover, different tolerance mechanisms, such as the morp…	Rejected	Review
WRKY' + 'gene express'+ 'drought stress' + ' plants'+ 'PGPR'	Google Scholar	Networking by small-molecule hormones in plant immunity	Pieterse et al. 2009	Plants live in complex environments in which they intimately interact with a broad range of microbial pathogens with different lifestyles and infection strategies. The evolutionary arms race between plants and their attackers provided plants with a highly sophisticated defense system that, like the animal innate immune system, recognizes pathogen molecules and responds by activating specific defe…	Rejected	Review
WRKY' + 'gene express'+ 'drought stress' + ' plants'+ 'PGPR'	Google Scholar	Induced systemic resistance in strawberry (Fragaria× ananassa) to powdery mildew using various control agents	Harel et al., 2021	Powdery mildew, caused by Podosphaera aphanis, is one of the major fungal diseases of cultivated strawberry (Fragaria × ananassa Duchense) world-wide. In the present research we report the efficacy of various control agents in induced resistance in strawberry plants against Powdery mildew. Inducers tested are Trichoderma harzianum T39, acibenzolar-S-methyl (Bion), a new protein hydrolysate induce…	Rejected	Biotic stress
WRKY' + 'gene express'+ 'drought stress' + ' plants'+ 'PGPR'	Google Scholar	Genomic Designing for Abiotic Stress Resistant Oilseed Crops	Khan et al., 2022		Rejected	Book
WRKY' + 'gene express'+ 'drought stress' + ' plants'+ 'PGPR'	Google Scholar	Transcriptome skimming of lentil (Lens culinaris Medikus) cultivars with contrast reaction to salt stress	Singh et al., 2021	Extensive transcriptomic skimming was conducted to decipher molecular, morphological, physiological, and biochemical responses in salt-tolerant (PDL-1) and salt-sensitive (L-4076) cultivars under control (0 mM NaCl) and salinity stress (120 mM NaCl) conditions at seedling stage. Morphological, physiological, and biochemical studies revealed that PDL-1 exhibited no salt injury and had higher K+/ N…	Rejected	No PGPR
WRKY' + 'gene express'+ 'drought stress' + ' plants'+ 'PGPR'	Google Scholar	Omics applications: towards a sustainable protection of tomato	Pentimone et al., 2020	Transcriptome data and gene expression analysis have a huge potential in the study of multiple relationships involving plants, pathogens, and pests, including the interactions with beneficial microorganisms such as endophytes or other functional groups. Next-generation sequencing (NGS) and other recent long-read-based sequencing approaches (i.e., nanopore and others) provide unprecedented tools a…	Rejected	Review
WRKY' + 'gene express'+ 'drought stress' + ' plants'+ 'PGPR'	Google Scholar	WRKY6 restricts Piriformospora indica-stimulated and phosphate-induced root development in Arabidopsis	Bakshi et al., 2015	Background: Arabidopsis root growth is stimulated by Piriformospora indica, phosphate limitation and inactivation of the WRKY6 transcription factor. Combinations of these factors induce unexpected alterations in root and shoot growth, root architecture and root gene expression profiles. Results: The results demonstrate that P. indica promotes phosphate uptake and root development under Pi limitat…	Rejected	No abiotic stress
WRKY' + 'gene express'+ 'drought stress' + ' plants'+ 'PGPR'	Google Scholar	Recent Advances in Understanding Mechanisms of Plant Tolerance and Response to Aluminum Toxicity	Wei et al., 2021	Aluminum (Al) toxicity is a major environmental stress that inhibits plant growth and development. There has been impressive progress in recent years that has greatly increased our understanding of the nature of Al toxicity and its mechanisms of tolerance. This review describes the transcription factors (TFs) and plant hormones involved in the adaptation to Al stress. In particular, it discusses …	Rejected	Review
WRKY' + 'gene express'+ 'drought stress' + ' plants'+ 'PGPR'	Google Scholar	Differential Gene Expression Reflects Morphological Characteristics and Physiological Processes in Rice Immunity against Blast Pathogen Magnaporthe oryzae	Azizi et al., 2015	The rice blast fungus Magnaporthe oryzae is a serious pathogen that jeopardises the world’s most important food-security crop. Ten common Malaysian rice varieties were ex- amined for their morphological, physiological and genomic responses to this rice blast path- ogen. qPCR quantification was used to assess the growth of the pathogen population in resistant and susceptible rice varieties. The ch…	Rejected	Biotic stress
WRKY' + 'gene express'+ 'drought stress' + ' plants'+ 'PGPR'	Google Scholar	Characterizing short and long term iron stress responses in iron deficiency tolerant and susceptible soybean (Glycine max L. Merr.)	Atencio et al., 2021	Nutrient deficiencies limit growth and yield in many different crop species. The calcareous soils in the upper Midwestern United States favor the development of iron deficiency chlorosis (IDC) in soybean (Glycine max L. Merr.). Even minor symptoms result in end of season yield loss. To identify molecular pathways and networks un- derlying tolerance to iron deficiency stress in soybean, we leverag…	Rejected	No PGPR
WRKY' + 'gene express'+ 'drought stress' + ' plants'+ 'PGPR'	Google Scholar	A Novel Gene SbSI-2 Encoding Nuclear Protein from a Halophyte Confers Abiotic Stress Tolerance in E. coli and Tobacco	Yadav et al., 2014		Rejected	duplicate
WRKY' + 'gene express'+ 'drought stress' + ' plants'+ 'PGPR'	Google Scholar	Salicylic Acid in Plant Symbioses: Beyond Plant Pathogen Interactions	Benjamin et al., 2022	Plants form beneficial symbioses with a wide variety of microorganisms. Among these, endophytes, arbuscular mycorrhizal fungi (AMF), and nitrogen-fixing rhizobia are some of the most studied and well understood symbiotic interactions. These symbiotic microorganisms promote plant nutrition and growth. In exchange, they receive the carbon and metabolites necessary for their development and multipli…	Rejected	Review
WRKY' + 'gene express'+ 'drought stress' + ' plants'+ 'PGPR'	Google Scholar	The neonicotinoid insecticide thiamethoxam enhances expression of stress-response genes in Zea mays in an environmentally specific pattern	House et al., 2021	Recent studies indicate that thiamethoxam (TMX), a neonicotinoid insecticide, can affect plant responses to environmental stressors, such as neighboring weeds. The molecular mechanisms behind both stable and environmentally specific responses to TMX likely involve genes related to defense and stress responses. We investigated the effect of a TMX seed treatment on global gene expression in maize c…	Rejected	Biotic stress
WRKY' + 'gene express'+ 'drought stress' + ' plants'+ 'PGPR'	Google Scholar	Drought Stress Tolerance in Wheat and Barley: Advances in Physiology, Breeding and Genetics Research	Sallam et al., 2019	Climate change is a major threat to most of the agricultural crops grown in tropical and sub-tropical areas globally. Drought stress is one of the consequences of climate change that has a negative impact on crop growth and yield. In the past, many simulation models were proposed to predict climate change and drought occurrences, and it is extremely important to improve essential crops to meet th…	Rejected	Review
WRKY' + 'gene express'+ 'drought stress' + ' plants'+ 'PGPR'	Google Scholar	SOS5 gene-abscisic acid crosstalk and their interaction with antioxidant system in Arabidopsis thaliana under salt stress	Acet et al., 2020	SOS5 locus, encodes cell wall adhesion protein under salt stress conditions in plants, and it is required for normal cell expansion as well as for sustaining cell wall integrity and structure. However, it is still unknown how this gene locus-ABA cross-talk and interacts with the antioxidant mechanism under salt stress conditions. For this purpose, the study focused on mutant sos5-1 plant treated …	Rejected	No PGPR
WRKY' + 'gene express'+ 'drought stress' + ' plants'+ 'PGPR'	Google Scholar	Jasmonates and Plant Salt Stress: Molecular Players, Physiological Effects, and Improving Tolerance by Using Genome-Associated Tools	Delgado et al., 2021	Soil salinity is one of the most limiting stresses for crop productivity and quality worldwide. In this sense, jasmonates (JAs) have emerged as phytohormones that play essential roles in mediating plant response to abiotic stresses, including salt stress. Here, we reviewed the mechanisms underlying the activation and response of the JA-biosynthesis and JA-signaling pathways under saline condition…	Rejected	Review
WRKY' + 'gene express'+ 'drought stress' + ' plants'+ 'PGPR'	Google Scholar	Sulfite Reductase (SiR) Gene in Rice (Oryza sativa): Bioinformatics and Expression Analyses Under Salt and Drought Stresses	Kurt et al., 2022	Rice sulfite reductase (OsSiR) is important protein in reducing sulfite to sulfide. In this paper, it is aimed to shed light on OsSiR’s probable structure, function, and expression using in silico methods and test its responses under drought and salt stresses. Moreover, it was also analyzed if OsSiR was structurally different from other SiR proteins. We estimated that OsSiR lacks ribbon–helix–hel…	Rejected	No PGPR
WRKY' + 'gene express'+ 'drought stress' + ' plants'+ 'PGPR'	Google Scholar	Genome-wide identification and expression analysis of the B-box transcription factor gene family in grapevine (Vitis vinifera L.)	Zhang et al., 2021	Background: B-box (BBX) zinc-finger transcription factors play important roles in plant growth, development, and stress response. Although these proteins have been studied in model plants such as Arabidopsis thaliana or Oryza sativa, little is known about the evolutionary history or expression patterns of BBX proteins in grapevine (Vitis vinifera L.). Results: We identified a total of 25 VviBBX g…	Rejected	No abiotic stress
WRKY' + 'gene express'+ 'drought stress' + ' plants'+ 'PGPR'	Google Scholar	Effect of disinfecting harvesting knives with sodium hypochlorite on soft rot infection of Kimchi cabbage	Hong et al., 2021	This study evaluated the effect of sterilizing harvesting knives with sodium hypochlorite (NaOCl) on soft rot in Kimchi cabbage. Knives were infected with Pectobacterium carotovorum subsp. carotovorum (Pcc), sterilized with NaOCl (100, 200, and 300 mg/L), and used to cut Kimchi cabbage slices, which were incubated for 70 h in a 28 °C incubator. In Kimchi cabbage slices cut with a Pcc-inoculated k…	Rejected	Biotic stress
WRKY' + 'gene express'+ 'drought stress' + ' plants'+ 'PGPR'	Google Scholar	Is Endophytic Colonization of Host Plants a Method of Alleviating Drought Stress? Conceptualizing the Hidden World of Endophytes	Byregowda et al., 2022	In the wake of changing climatic conditions, plants are frequently exposed to a wide range of biotic and abiotic stresses at various stages of their development, all of which negatively affect their growth, development, and productivity. Drought is one of the most devastating abiotic stresses for most cultivated crops, particularly in arid and semiarid environments. Conventional breeding and biot…	Rejected	Review
WRKY' + 'gene express'+ 'drought stress' + ' plants'+ 'PGPR'	Google Scholar	Organic Amendments and Soil Suppressiveness in Plant Disease Management	Kurabachew et al., 2015		Rejected	Book
WRKY' + 'gene express'+ 'drought stress' + ' plants'+ 'PGPR'	Google Scholar	The Arabidopsis MYB transcription factor, MYB111 modulates salt responses by regulating flavonoid biosynthesis	Li et al., 2019	Salt stress is an adverse environmental factor severely disturbing plant growth and development. Correspondingly, plants have evolved in a set of machinery to cope with salt toxicity including transcriptional regulation. In this study, by employing knockout and overproducing plants, we found that MYB111 is a positive regulator in salt stress response. MYB111 deficiency significantly decreased sal…	Rejected	No PGPR
WRKY' + 'gene express'+ 'drought stress' + ' plants'+ 'PGPR'	Google Scholar	Mutualistic fungus Piriformospora indica modulates cadmium phytoremediation properties of host plant via concerted action of enzymatic and non-enzymatic biochemicals	Khalid et al., 2020	Soils and ecosystems contaminated with cadmium (Cd) threaten human health and adversely affect morphological, physiological, and biochemical parameters of plants. The symbiotic association of endophytic fungi with their host plants is the best strategy to improve various plant characteristics and remediate soils polluted with heavy metal(loid)s (HMs). Being a well-known plant growth-promoting fun…	Rejected	Fungi
WRKY' + 'gene express'+ 'drought stress' + ' plants'+ 'PGPR'	Google Scholar	Plant Growth-Promoting Microbe Mediated Uptake of Essential Nutrients (Fe, P, K) for Crop Stress Management: Microbe–Soil–Plant Continuum	Pattnaik et al., 2021	The indiscriminate and intensive use of agrochemicals in developing nations to enhance crop productivity has posed an alarming threat to soil quality, fertility, biodiversity, food safety, agricultural sustainability, and groundwater quality, thus critically affecting planetary health and food productivity. Additionally, both abiotic and biotic stresses and developmental disorders, i.e., disease …	Rejected	Review
WRKY' + 'gene express'+ 'drought stress' + ' plants'+ 'PGPR'	Google Scholar	Identification of genes involved in drought tolerance in seedlings of the desert grass, Psammochloa villosa (Poaceae), based on full-length isoform sequencing and de novo assembly from short reads	Liu et al., 2022	Psammochloa villosa is a perennial herbaceous plant that is dominant within arid regions of the Inner Mongolian Plateau and the Qinghai-Tibet Plateau in China, where it is an endemic species and exhibits strong drought tolerance and wind resistance. To study drought tolerance in P. villosa and determine its molecular basis, we simulated high and moderate drought stress in a controlled environment…	Rejected	No PGPR
WRKY' + 'gene express'+ 'drought stress' + ' plants'+ 'PGPR'	Google Scholar	Effect of the plant probiotic bacteria on terpenoid indole alkaloid biosynthesis pathway gene expression profiling, vinblastine and vincristine content in the root of Catharanthus roseus	Ahmadzadeh et al., 2022	Background Catharanthus roseus is the sole resource of vinblastine and vincristine, two TIAs of great interest for their powerful anticancer activities. Increasing the concentration of these alkaloids in various organs of the plant is one of the important goals in C. roseus breeding programs. Plant probiotic bacteria (PBB) act as biotic elicitors and can induce the synthesis of secondary products…	Rejected	No WRKY
WRKY' + 'gene express'+ 'drought stress' + ' plants'+ 'PGPR'	Google Scholar	Is modulating virus virulence by induced systemic resistance realistic?	Faoro et al., 2015	Induction of plant resistance, either achieved by chemicals (systemic acquired resistance, SAR) or by rhizobacteria (induced systemic resistance, ISR) is a possible and/or complementary alternative to man- age virus infections in crops. SAR mechanisms operating against viruses are diverse, depending on the pathosystem, and may inhibit virus replication as well as cell-to-cell and long-distance mo…	Rejected	Review
WRKY' + 'gene express'+ 'drought stress' + ' plants'+ 'PGPR'	Google Scholar	Beneficial Microorganisms in Agriculture	Srivastava et al., 2022		Rejected	Book
WRKY' + 'gene express'+ 'drought stress' + ' plants'+ 'PGPR'	Google Scholar	Alpha-Linolenic Acid Mediates Diverse Drought Responses in Maize (Zea mays L.) at Seedling and Flowering Stages	Zi et al., 2022	Water shortage caused by long-term drought is one of the most serious abiotic stress factors in maize. Different drought conditions lead to differences in growth, development, and metabolism of maize. In previous studies, proteomics and genomics methods have been widely used to explain the response mechanism of maize to long-term drought, but there are only a few articles related to metabolomics.…	Rejected	No PGPR
WRKY' + 'gene express'+ 'drought stress' + ' plants'+ 'PGPR'	Google Scholar	Plant Growth Promoting Rhizobacteria for Sustainable Stress Management Volume 1: Rhizobacteria in Abiotic Stress Management	Sayyed et al., 2019		Rejected	Book
WRKY' + 'gene express'+ 'drought stress' + ' plants'+ 'PGPR'	Google Scholar	Mitigation of Abiotic Stress in Legume-Nodulating Rhizobia for Sustainable Crop Production	Sindhu et al., 2020		Rejected	duplicate
WRKY' + 'gene express'+ 'drought stress' + ' plants'+ 'PGPR'	Google Scholar	Plant Growth‐Promoting Rhizobacteria‐Mediated Adaptive Responses of Plants Under Salinity Stress	Hoque et al., 2022		Rejected	duplicate
WRKY' + 'gene express'+ 'drought stress' + ' plants'+ 'PGPR'	Google Scholar	Uncovering the role of melatonin in plant stress tolerance	Ayyaz et al., 2022	In recent years, melatonin has emerged as a popular research topic in the field of plant biology. Since melatonin is implicated in numerous plant developmental processes and stress responses, the exploration of its roles in regulating various physiological and biochemical processes contributing to plant growth and development under normal or stress conditions has become a rapidly progressing fiel…	Rejected	Review
