# Supplementary material for: Meta-analysis of plant growth-promoting rhizobacteria interaction with host plants: implications for drought stress response gene expression
Source: Front Plant Sci. 2024 Jan 15;14:1282553. doi: 10.3389/fpls.2023.1282553 (PMC10823023; doi:10.3389/fpls.2023.1282553)
Supplement: Supplementary file 24 [file Table_9.xlsx]

## Sheet: GS (97)
Keywords	Search engine	Title	Autors	Abstract	Accepted/Rejected	motivo
"DREB2" "Drought stress" "PGPR"	Google Scholar	Plant aquaporins: A frontward to make crop plants drought resistant	Ahmed et al., 2021	Drought stress alters gene expression and causes cellular damage in crop plants. Drought inhibits photosynthesis by reducing the content and the activity of the photosynthetic carbon reduction cycle, ultimately decreasing the crop yield. The role of aquaporins (AQP) in improving the growth and adaptation of crop plants under drought stress is of importance. AQP form channels and control water tra…	Rejected	review
"DREB2" "Drought stress" "PGPR"	Google Scholar	Recent methods of drought stress tolerance in plants	Ali et al., 2017	In the climate change scenario the drought has been diagnosed as major stress affecting crop productivity. This review demonstrates some recent findings on the amelioration of drought stress. Nanoparticles, synthetic growth regulators viz. Trinexapac-ethyl, and Biochar addition helps to economize the water budget of plants, enhances the bioavailability of water and nutrients as well as overcomes …	Rejected	review
"DREB2" "Drought stress" "PGPR"	Google Scholar	Shade and microbes enhance drought stress tolerance in plants by inducing phytohormones at molecular levels: A review	Asghar et al., 2022	Plants are exposed to several adverse environmental effects during their life span. Among them drought stress is one of the major threats to agricultural productivity. In order to survive in such unstable environment, plants have developed mechanisms through which they recognize the severity of the stress based on the incoming environmental stimuli. To combat the detrimental effects of drought, t…	Rejected	rewiev
"DREB2" "Drought stress" "PGPR"	Google Scholar	Amelioration of short-term drought stress during different growth stages in Brassica juncea by rhizobacteria mediated maintenance of ROS homeostasis	Asha et al., 2021	In the present investigation, the role of rhizobacteria in alleviating the deleterious effects of drought on mustard was assessed. The plants were exposed to short-term water shortages, during the vegetative and reproductive growth stages. Drought stress in both stages had a negative effect on growth, physiological, and biochemical parameters of mustard. Both the root and shoot biomass were signi…	Rejected	no fold change of DREB2
"DREB2" "Drought stress" "PGPR"	Google Scholar	Mechanisms of Abscisic Acid-Mediated Drought Stress Responses in Plants	Aslam et al., 2022	Drought is one of the major constraints to rain-fed agricultural production, especially under climate change conditions. Plants evolved an array of adaptive strategies that perceive stress stimuli and respond to these stress signals through specific mechanisms. Abscisic acid (ABA) is a premier signal for plants to respond to drought and plays a critical role in plant growth and development. ABA t…	Rejected	review
"DREB2" "Drought stress" "PGPR"	Google Scholar	Environmental evaluation of auxin priming and plant growth promoting rhizobacteria on yield and yield components of wheat under drought stress	Bagheri et al., 2018	This study was performed to the environmental evaluation of auxin and plant growth promoting rhizobacteria priming on yield and yield components of wheat under drought stress. Experiment was conducted as a Split plot in RCBD design with 3 replications. Main factor included drought stress (irrigation on base of 25, 50 and 75%FC) and sub plots were inoculation at 4 levels (control, azotobacter, pse…	Rejected	no fold change DREB2
"DREB2" "Drought stress" "PGPR"	Google Scholar	Antioxidant, physiological and biochemical responses of drought susceptible and drought tolerant mustard (Brassica juncea L) genotypes to rhizobacterial inoculation under water deficit stress	Bandeppa et al., 2019	Response of drought susceptible (DS) genotype Pusa Karishma LES-39 and drought tolerant (DT) mustard genotype NPJ-124, to rhizobacterial inoculation under water deficit stress, was compared in the present study to determine the influence of inoculants on biochemical and physiological attributes of these two different genotypes. Inoculation was observed to improve root and shoot dry weight in both…	Accepted	1. crop study 2. fold change di DREB2 3. presence of control 4. statistical analysis
"DREB2" "Drought stress" "PGPR"	Google Scholar	Plant growth-promoting rhizobacteria enhance wheat salt and drought stress tolerance by altering endogenous phytohormone levels and TaCTR1/TaDREB2 expression	Barnawal et al., 2017	Abiotic stresses such as salt and drought represent adverse environmental conditions that significantly damage plant growth and agricultural productivity. In this study, the mechanism of the plant growth-promoting rhizobacteria (PGPR)-stimulated tolerance against abiotic stresses has been explored. Results suggest that PGPR strains, Arthrobacter protophormiae (SA3) and Dietzia natronolimnaea (STR…	Accepted	1. crop study 2. fold change di DREB2 3. control 4. statistical analysis
"DREB2" "Drought stress" "PGPR"	Google Scholar	Caracterizaciòn molecular y analisis de expresión de un factor de transcripción nac de saccharum officinarum en condiciones de salinidad y sequia	Bermejo 2019		Rejected	Unreadable
"DREB2" "Drought stress" "PGPR"	Google Scholar	Mechanistic insights of CRISPR/Cas-mediated genome editing towards enhancing abiotic stress tolerance in plants	Bhat et al., 2021	Abiotic stresses such as temperature (high/low), drought, salinity, and others make the environment hostile to plants. Abiotic stressors adversely affect plant growth and development; and thereby makes a direct impact on overall plant productivity. Plants confront stress by developing an internal defense system orchestrated by compatible solutes, reactive oxygen species scavengers and phytohormon…	Rejected	review
"DREB2" "Drought stress" "PGPR"	Google Scholar	Phenotypical, physiological and molecular assessment of drought tolerance of five Egyptian teosinte genotypes	Bondok et al., 2022	Prolonged drought presents a serious challenge to the agricultural sector. The main concern of this work was to assess the phenotypical, physiological, and molecular responses of five teosinte (Zea mexicana Schrad L.) genotypes (Ba, Gm1, Gm2, Gm3 and Gm4). In a two-season (2020 and 2021) field experiment, fifteen-day-old teosinte plants were subjected to well-watered (15-day watering frequency) a…	Rejected	no fold chang DREB2
"DREB2" "Drought stress" "PGPR"	Google Scholar	Shaping Durum Wheat for the Future: Gene Expression Analyses and Metabolites Profiling Support the Contribution of BCAT Genes to Drought Stress Response	Buffagni et al., 2020	Global climate change, its implications for agriculture, and the complex scenario presented by the scientific community are of worldwide concern. Drought is a major abiotic stress that can restrict plants growth and yields, thus the identification of genotypes with higher adaptability to drought stress represents one of the primary goals in breeding programs. During abiotic stress, metabolic adap…	Rejected	branched-chain amino acid aminotransferases (BCATs) in stress response
"DREB2" "Drought stress" "PGPR"	Google Scholar	Advances in Wheat Physiology in Response to Drought and the Role of Plant Growth Promoting Rhizobacteria to Trigger Drought Tolerance	Camaille et al., 2021	In the coming century, climate change and the increasing human population are likely leading agriculture to face multiple challenges. Agricultural production has to increase while preserving natural resources and protecting the environment. Drought is one of the major abiotic problems,which limits the growth and productivity of crops and impacts 1–3% of all land. To cope with unfavorable water-de…	Rejected	review
"DREB2" "Drought stress" "PGPR"		Genetic engineering against abiotic stress in Neotropical crop plants: osmolites, transcription factors and CRISPR/Cas9	Carvajal-Campos et al., 2021	The neotropics are the site of origin of a large variety of plants that are currently successfully cultivated in different regions of the world. However, adverse climatic conditions, which can be exacerbated by the effects of anthropogenic climate change, can affect their yield and productivity due to the abiotic stresses that can be generated. As an alternative to counteract these effects, genet…	Rejected	no english
"DREB2" "Drought stress" "PGPR"	Google Scholar	The role of DREB2 gene in drought tolerance of common wheat (Triticum aestivum L.) associated with Azospirillum brasilense	Dehghani et al., 2019	Dehydration causes loss of wheat (Triticum aestivum L.) yield. Inoculation of wheat with Azospirillum brasilense improves its tolerance to drought. Although up-regulation of DREB2 gene has increased drought tolerance of wheat, less information exists about DREB2 expression under inoculation with A. brasilense. In this study, the physiological responses of different pairs of six wheat cultivars wi…	Rejected	no control
"DREB2" "Drought stress" "PGPR"	Google Scholar	Characterisation of root architectural responses of mungbean to water deficit	Dodt	Plant root systems are much more complex than simple anchors in the soil. Although this is itself a deceptively important function, plants perform a plethora of additional roles in sensory perception, signal transduction, nutrient and water acquisition as well as acting as hosts to a range of beneficial symbiotic microorganisms. In many plants the root system has a relatively high level of plasti…	Rejected	thesis
"DREB2" "Drought stress" "PGPR"	Google Scholar	Growing more with less: Breeding and developing drought resilient soybean to improve food security	Dubey et al., 2019	Soybean (Glycine max L.) is considered an important crop, and enhancing its production under drought stress and changing climatic conditions to meet the challenges of global food security is crucial. Drought is considered one of the major abiotic factors that adversely affect soybean production. To address this challenge, we need to develop an integrative research approach that will bring togethe…	Rejected	review
"DREB2" "Drought stress" "PGPR"	Google Scholar	Delineation of mechanistic approaches of rhizosphere microorganisms facilitated plant health and resilience under challenging conditions	Dukare et al., 2022	Sustainable agriculture demands the balanced use of inorganic, organic, and microbial biofertilizers for enhanced plant productivity and soil fertility. Plant growth-enhancing rhizospheric bacteria can be an excellent biotechnological tool to augment plant productivity in different agricultural setups. We present an overview of microbial mechanisms which directly or indirectly contribute to plant…	Rejected	review
"DREB2" "Drought stress" "PGPR"	Google Scholar	Azospirillum lipoferum FK1 confers improved salt tolerance in chickpea (Cicer arietinum L.) by modulating osmolytes, antioxidant machinery and stressrelated genes expression	El-Esawi et al., 2019	High salinity restricts crop growth and yield. Plant growth-promoting soil rhizobacteria boost crops growth and ameliorate the adverse effects of salt stress through regulating several physiological, biochemical and molecular processes. This study investigated the effects of Azospirillum lipoferum FK1 strain on chickpea (Cicer arietinum L.) growth and performance under saline conditions (0, 75 an…	Rejected	Salinity stress
"DREB2" "Drought stress" "PGPR"	Google Scholar	Ameliorative Effect of Humic Acid and Plant Growth-Promoting Rhizobacteria (PGPR) on Hungarian Vetch Plants under Salinity Stress	Esringü et al., 2016	Salinity is one of the major abiotic stress factors for cultivated plants, limiting their growth and productivity in many areas of the world. This study aims to determine the ameliorative effects of humic acid (HA) and plant growthpromoting bacteria (PGPR) on amino acids, enzymes, minerals, organic acids and hormones in Hungarian vetch (Vicia pannonica) plants under salinity stress conditions. Sa…	Rejected	no fold change of DREB2
"DREB2" "Drought stress" "PGPR"	Google Scholar	Use of plant growth promoting rhizobacteria (PGPRs) with multiple plant growth promoting traits in stress agriculture: Action mechanisms and future prospects	Etesami et al., 2018	Increased incidence of abiotic stresses impacting adversely plant growth and productivity in major crops is being witnessed all over the world. Therefore, as a result of such stress factors, plant growth under the stress conditions will be less than the non-stress conditions. Growing concerns and global demand for correct, environmentally friendly techniques exist to reduce the adverse effects of…	Rejected	review
"DREB2" "Drought stress" "PGPR"	Google Scholar	Mechanisms of plant response to salt and drought stress and their alteration by rhizobacteria	Forni et al., 2017	Background Soil salinity and drought are an enormous worldwide problem for agriculture, horticulture and silviculture. The initial responses of plants to drought and salinity are similar; both are attributed to water deficit which inhibits plant growth and development. Scope In this review, an overview of the major physiological and biochemical changes that occur in plants as a consequence of sal…	Rejected	review
"DREB2" "Drought stress" "PGPR"	Google Scholar	Bradyrhizobium japonicum irat fa3 increases biomass, yield and drought tolerance in plants	Gachomo et al., 2014	The effects of plant growth promoting rhizobacterium, Bradyrhizobium japonicum IRAT FA3 (PGPR) on non-leguminous model plants, maize (Zea mays) and Arabidopsis thaliana, were studied in this work for the first time. The impact of B. japonicum IRAT FA3 on plant growth development, biomass and yield were investigated using a nondestructive analytical method on root length and root hair formation, g…	Rejected	no fold change of DREB2
"DREB2" "Drought stress" "PGPR"	Google Scholar	Bacillus subtilis B26, a plant growth promoter and drought protector of grasses	Gagné-Bourque, 2015	Most healthy naturally propagated plants grown in field or potting soils are colonized by different taxonomic groups of endophytic bacteria. These bacteria form non-pathogenic relationships with their hosts. Such associations can increase plant growth and hasten development or improve resistance to environmental stress. In this study, several bacterial endophytes, isolated from cultivars of switc…	Rejected	Thesis
"DREB2" "Drought stress" "PGPR"	Google Scholar	Accelerated Growth Rate and Increased Drought Stress Resilience of the Model Grass Brachypodium distachyon Colonized by Bacillus subtilis B26	Gagné-Bourque et al., 2015	Plant growth-promoting bacteria (PGB) induce positive effects in plants, for instance, increased growth and reduced abiotic stresses susceptibility. The mechanisms by which these bacteria impact the host plant are numerous, diverse and often specific. Here, we studied the agronomical, molecular and biochemical effects of the endophytic PGB Bacillus subtilis B26 on the full life cycle of Brachypod…	Accepted	1. crop study 2. fold change di DREB2 3. control 4. statistical analysis
"DREB2" "Drought stress" "PGPR"	Google Scholar	The influence of endophytes on rice fitness under environmental stresses	Ganie et al., 2017	Rice (Oryza sativa) crop is continuously subjected to biotic and abiotic stresses, compromising growth and consequently yield. The situation is exacerbated by climate change impacting on ecosystems and biodiversity. Genetic engineering has been used to develop stress-tolerant rice, alongside physical and chemical methods to mitigate the effect of these stresses. However, the success of these stra…	Rejected	review
"DREB2" "Drought stress" "PGPR"	Google Scholar	Molecular Mechanism of Plant Adaptation and Tolerance to Cold Stress	Gupta et al., 2020	The alarming increase in the rate of population is one of the foremost concerns of the agriculture sector. In particular, cold stress often limits the productivity of economically important crop species largely due to acute dehydration in plants. To cope with these stress conditions, plants respond in a variety of levels by modulating physiological and molecular changes in their system. Character…	rejected	book
"DREB2" "Drought stress" "PGPR"	Google Scholar	Mechanistic Insights of Plant Growth Promoting Bacteria Mediated Drought and Salt Stress Tolerance in Plants for Sustainable Agriculture	Gupta et al., 2022	Climate change has devastating effects on plant growth and yield. During ontogenesis, plants are subjected to a variety of abiotic stresses, including drought and salinity, affecting the crop loss (20–50%) and making them vulnerable in terms of survival. These stresses lead to the excessive production of reactive oxygen species (ROS) that damage nucleic acid, proteins, and lipids. Plant growth-pr…	rejected	review
"DREB2" "Drought stress" "PGPR"	Google Scholar	New Insights on Plant Salt Tolerance Mechanisms and Their Potential Use for Breeding	Hanin et al., 2016	Soil salinization is a major threat to agriculture in arid and semi-arid regions, where water scarcity and inadequate drainage of irrigated lands severely reduce crop yield. Salt accumulation inhibits plant growth and reduces the ability to uptake water and nutrients, leading to osmotic or water-deficit stress. Salt is also causing injury of the young photosynthetic leaves and acceleration of the…	Rejected	review
"DREB2" "Drought stress" "PGPR"	Google Scholar	Plant Ecophysiology and Adaptation under Climate Change: Mechanisms and Perspectives II, Mechanisms of Adaptation and Stress Amelioration	Hasanuzzaman Editor, 2020		Rejected	Book
"DREB2" "Drought stress" "PGPR"	Google Scholar	Wheat Production in Changing Environments, Responses, Adaptation and Tolerance	Hasanuzzaman et al. Editors, 2019		Rejected	Book
"DREB2" "Drought stress" "PGPR"	Google Scholar	Plant Growth‑Promoting Rhizobacteria‑Mediated Adaptive Responses of Plants Under Salinity Stress	Hoque et al., 2022	In this recent era, several approaches have been developed to alleviate the adverse effects of salinity stress in different plants. However, some of them are not eco-friendly. In this context, evolving sustainable approaches which enhance the productivity of saline soil without harming the environment are necessary. Many recent studies showed that plant growth-promoting rhizobacteria (PGPR) are k…	Rejected	review
"DREB2" "Drought stress" "PGPR"	Google Scholar	Genetic and Molecular Mechanisms Conferring Heat Stress Tolerance in Tomato Plants	Hoshikawa et al., 2021	Climate change is a major threat to global food security. Changes in climate can directly impact food systems by reducing the production and genetic diversity of crops and their wild relatives, thereby restricting future options for breeding improved varieties and reducing the ability to adapt crops to future challenges. The global surface temperature is predicted to rise by an average of 0.3◦C d…	Rejected	review
"DREB2" "Drought stress" "PGPR"	Google Scholar	Bacillus atrophaeus WZYH01 and Planococcus soli WZYH02 Improve Salt Tolerance of Maize (Zea mays L.) in Saline Soil	Hou et al., 2022	With the increasing shortage of land resources and people’s attention to the ecological environment, the application of microbial fertilizer with natural soil microorganisms as the main component has attracted increasing attention in saline agriculture. In this study, two salt-tolerant strains, YL07 (Bacillus atrophaeus) and YL10 (Planococcus soli), were isolated from maize (Zea mays L.) rhizosph…	Rejected	no fold change of DREB2
"DREB2" "Drought stress" "PGPR"	Google Scholar	Exogenous Melatonin mediates the regulation of endogenous nitric oxide in Glycine max L. to reduce effects of drought stress	Imran et al., 2021	Drought stress retards plant growth and yield. Melatonin and nitric oxide (NO) have demonstrated their potential role against abiotic stresses; however, the underlying molecular mechanism by which they interact and extend drought stress tolerance has not been fully elucidated. Herein, the current study was performed to establish the optimum beneficial concentration of MT and NO in combating droug…	Rejected	no fold change of DREB2
"DREB2" "Drought stress" "PGPR"	Google Scholar	Toward Integrated Multi-Omics Intervention: Rice Trait Improvement and Stress Management	Iqbal et al., 2021	Rice (Oryza sativa) is an imperative staple crop for nearly half of the world’s population. Challenging environmental conditions encompassing abiotic and biotic stresses negatively impact the quality and yield of rice. To assure food supply for the unprecedented ever-growing world population, the improvement of rice as a crop is of utmost importance. In this era, “omics” techniques have been comp…	Rejected	review
"DREB2" "Drought stress" "PGPR"	Google Scholar	Bacilli in Climate Resilient Agriculture and Bioprospecting Volume 2	Islam et al. Editors		Rejected	book
"DREB2" "Drought stress" "PGPR"	Google Scholar	Genome-wide profiling reveals extensive alterations in Pseudomonas putidamediated miRNAs expression during drought stress in chickpea (Cicer arietinum L.)	Jatan et al., 2019	Pseudomonas putida strain MTCC5279 (RA) is a plant growth promoting rhizobacteria which improves growth and development of plants by colonizing their root surface and also confers drought stress tolerance. Further, along with several stress responsive genes, microRNAs are also well known for their crucial involvement in drought stress response. Considering the above, in this study, we performed i…	Rejected	miRNA
"DREB2" "Drought stress" "PGPR"	Google Scholar	Molecular responses to drought stress in plants	Kaur et al., 2017	Drought is a severe environmental constraint to plant productivity. Being a multidimensional stress, it triggers a wide variety of plant responses ranging from physiological, biochemical to molecular levels. One of the inevitable consequences of drought stress is an increase in reactive oxygen species (ROS) production in different cellular compartments, namely the chloroplasts and mitochondria. T…	Rejected	mini review
"DREB2" "Drought stress" "PGPR"	Google Scholar	Preparing for battle: rhizobacteria’s role in priming plants for drought stress	Kefela, 2016	Drought is an issue that is prevalent in our world today, becoming an unavoidable constraint to crop productivity imperiling agricultural-based economies and food availability. Therefore, the development of environmentally-friendly and sustainable approaches to ameliorate the damage caused by drought is of primary importance. Soil-dwelling microorganisms found in the rhizosphere of a plant play p…	Rejected	thesis
"DREB2" "Drought stress" "PGPR"	Google Scholar	Drought Stress in Grain Legumes: Effects, Tolerance Mechanisms and Management	Khatun et al., 2021	Grain legumes are important sources of proteins, essential micronutrients and vitamins and for human nutrition. Climate change, including drought, is a severe threat to grain legume production throughout the world. In this review, the morpho-physiological, physio-biochemical and molecular levels of drought stress in legumes are described. Moreover, different tolerance mechanisms, such as the morp…	Rejected	review
"DREB2" "Drought stress" "PGPR"	Google Scholar	Hydrogen sulfide and phytohormones crosstalk in plant defense against abiotic stress	Kour et al., 2021		Rejected	book chapted
"DREB2" "Drought stress" "PGPR"	Google Scholar	Vision 2030	Kranthi et al., 2011		Rejected	no research articol
"DREB2" "Drought stress" "PGPR"	Google Scholar	Plant Growth-Promoting Bacteria: Biological Tools for the Mitigation of Salinity Stress in Plants	Kumar et al., 2020	Salinity stress is one of the major abiotic stresses threatening sustainable crop production worldwide. The extent of salinity affected area is expected to cover about 50% of total agricultural land by 2050. Salinity stress produces various detrimental effects on plants’ physiological, biochemical, and molecular features and reduces productivity. The poor plant growth under salinity stress is due…	Rejected	review
"DREB2" "Drought stress" "PGPR"	Google Scholar	Induced drought tolerance through wild and mutant bacterial strain Pseudomonas simiae in mung bean (Vigna radiata L.)	Kumari et al., 2016	The present study focused on the overproducing mutant of a plant growth promoting rhizobacterium (PGPR) Pseudomonas simiae strain AU (MTCC-12057) for significant drought tolerance in mung bean plants. Five mutants namely AU-M1, AU-M2, AU-M3, AU-M4 and AU-M5 were made after treatment of wild type strain with N-methyl-N-nitro-N-nitrosoguanidine. Mutant strain AUM4 was recorded for enhanced ACC deam…	Accepted	1. crop plant 2. statiscal analysis 3. presence of control
"DREB2" "Drought stress" "PGPR"	Google Scholar	Drought and Heat Stress in Cool-Season Food Legumes in Sub-Tropical Regions: Consequences, Adaptation, and Mitigation Strategies	Kumari et al., 2021	Drought and heat stress are two major abiotic stresses that challenge the sustainability of agriculture to a larger extend. The changing and unpredictable climate further aggravates the efforts made by researchers as well as farmers. The stresses during the terminal stage of cool-season food legumes may affect numerous physiological and biochemical reactions that may result in poor yield. The pla…	Rejected	review
"DREB2" "Drought stress" "PGPR"	Google Scholar	Rhizobacterial Bacillus mycoides functions in stimulating the antioxidant defence system and multiple phytohormone signalling pathways to regulate plant growth and stress tolerance	Kurniawan et al., 2021	Aims: To analyse effects and mechanisms of plant growth promotion mediated by Bacillus mycoides strain A3 (BmA3), in Arabidopsis thaliana seedlings. Methods and Results: Bacillus mycoides strain A3 (BmA3) isolated from the bamboo rhizosphere produced phytohormones, including indole-3- acetic acid (IAA) and gibberellic acid (GA), and exhibited phosphate solubilization and radical scavenging activi…	Rejected	Arabidopsis thaliana
"DREB2" "Drought stress" "PGPR"	Google Scholar	Adaptation and tolerance of wheat plants to drought mediated by natural growth regulators bacillus spp.: mechanisms and practical importance	Lastochkina 2021		Rejected	review
"DREB2" "Drought stress" "PGPR"	Google Scholar	Epigenetic and targeted metabolic changes in microbial biostimulant-treated maize plants under drought stress conditions	Lephatsi 2020		Rejected	thesis
"DREB2" "Drought stress" "PGPR"	Google Scholar	Plant Responses to Abiotic Stresses and Rhizobacterial Biostimulants: Metabolomics and Epigenetics Perspectives	Lephatsi et al., 2021	In response to abiotic stresses, plants mount comprehensive stress-specific responses which mediate signal transduction cascades, transcription of relevant responsive genes and the accumulation of numerous different stress-specific transcripts and metabolites, as well as coordinated stress-specific biochemical and physiological readjustments. These natural mechanisms employed by plants are howeve…	Rejected	review
"DREB2" "Drought stress" "PGPR"	Google Scholar	Overexpression of GmNFYA5 confers drought tolerance to transgenic Arabidopsis and soybean plants	Ma et al., 2020	Background: Crop productivity is challenged by abiotic stresses, among which drought stress is the most common. NF-Y genes, especially NF-YA genes, regulate tolerance to abiotic stress. Results: Soybean NF-Y gene GmNFYA5 was identified to have the highest transcript level among all 21 NFYA genes in soybean (Glycine max L.) under drought stress. Drought-induced transcript of GmNFYA5 was suppressed…	Rejected	No fold change di DREB2 corrlelated to PGPR
"DREB2" "Drought stress" "PGPR"	Google Scholar	Overview of Cold Stress Regulation in Plants	Manasa et al., 2021	Among different environmental stresses, cold stress can significantly affect plant’s physiological activity, biochemical metabolism, growth,development and crop productivity. Problems due to cold stress should be addressed seriously keeping in concern extreme temperature events due to climate change, alarming increase in population growth and demanding food needs. Cold signal is recognized by rec…	Rejected	review
"DREB2" "Drought stress" "PGPR"	Google Scholar	Plant growth-promoting rhizobacteria Shewanella putrefaciens and Cronobacter dublinensis enhance drought tolerance of pearl millet by modulating hormones and stress-responsive genes	Manjunatha et al., 2022	Drought is a major abiotic stress that affects crop productivity. Endophytic bacteria have been found to alleviate the adverse effects of drought on plants. In the present study, we evaluated the effects of two endophytic bacteria Shewanella putrefaciens strain MCL-1 and Cronobacter dublinensis strain MKS-1 on pearl millet (Pennisetum glaucum (L.) R. Br.) under drought stress conditions. Pearl mi…	Accepted	1. crop study 2. presence of a control 3. analisi statistica 4. fold change di DREB2
"DREB2" "Drought stress" "PGPR"	Google Scholar	An overview of genetic improvement for drought tolerance in rice (Oryza sativa L.)	Masood et al., 2015	Plant growth and productivity of rice (Oryza sativa) is significantly affected by numerous biotic and abiotic stress inducing factors. Water deficit is regarded as one of the major abiotic stresses that adversely affect growth and yield of this crop. Drought stress is a restrictive factor for agricultural crops, preventing them from attaining maximum theoretical yield as determined by genetic fac…	Rejected	review
"DREB2" "Drought stress" "PGPR"	Google Scholar	Drought stress tolerance in cotton: progress and perspectives	Meshram et al., 2022	Cotton (Gossypium hirsutum L.) is a commercial fiber crop that is being cultivated under diverse climatic conditions across the globe. The demand for cotton and its by-products is increasing day by day due to more consumption in the textile industry and due to source of edible oil. Erratic rainfall patterns and increasing temperature resulting from climate change will likely make drought events m…	Rejected	book chapter
"DREB2" "Drought stress" "PGPR"	Google Scholar	Actinobacteria-enhanced plant growth, nutrient acquisition, and crop protection: Advances in soil, plant, and microbial multifactorial interactions	Mitra et al., 2022	Agricultural areas of land are deteriorating every day owing to population increase, rapid urbanization, and industrialization. To feed today’s huge populations, increased crop production is required from smaller areas, which warrants the continuous application of high doses of inorganic fertilizers to agricultural land. These cause damage to soil health and, therefore, nutrient imbalance conditi…	Rejected	review
"DREB2" "Drought stress" "PGPR"	Google Scholar	Plant Transcriptome Reprograming and Bacterial Extracellular Metabolites Underlying Tomato Drought Resistance Triggered by a Beneficial Soil Bacteria	Morcillo et al., 2021	Water deficit is one of the major constraints to crop production and food security worldwide. Some plant growth-promoting rhizobacteria (PGPR) strains are capable of increasing plant drought resistance. Knowledge about the mechanisms underlying bacteria-induced plant drought resistance is important for PGPR applications in agriculture. In this study, we show the drought stress-mitigating effects …	Rejected	no DREB2 expression
"DREB2" "Drought stress" "PGPR"	Google Scholar	Mechanisms Regulating the Dynamics of Photosynthesis Under Abiotic Stresses	Muhammad et al., 2021	Photosynthesis sustains plant life on earth and is indispensable for plant growth and development. Factors such as unfavorable environmental conditions, stress regulatory networks, and plant biochemical processes limits the photosynthetic efficiency of plants and thereby threaten food security worldwide. Although numerous physiological approaches have been used to assess the performance of key ph…	Rejected	review
"DREB2" "Drought stress" "PGPR"	Google Scholar	Research Progress and Perspective on Drought Stress in Legumes: A Review	Nadeem et al., 2019	Climate change, food shortage, water scarcity, and population growth are some of the threatening challenges being faced in today’s world. Drought stress (DS) poses a constant challenge for agricultural crops and has been considered a severe constraint for global agricultural productivity; its intensity and severity are predicted to increase in the near future. Legumes demonstrate high sensitivity…	Rejected	review
"DREB2" "Drought stress" "PGPR"	Google Scholar	Role of phytohormones as master regulators during the abiotic stress, Stress Tolerance in Horticultural Crops	Nahakpam et al., 2021		Rejected	book chapter
"DREB2" "Drought stress" "PGPR"		Drought tolerance mechanism in wheat: A Review	Nisa et al., 2019	Drought is one of the most important phenomena which limit crops’ production and yield, Crops demonstrate various morphological, physiological, biochemical, and molecular responses to tackle drought stress, Plant’s vegetative and reproductive stages are intensively influenced by drought stress, Drought tolerance is a complicated trait which is controlled by polygenes and their expressions are inf…	Rejected	review
"DREB2" "Drought stress" "PGPR"	Google Scholar	Plant Growth Promoting Rhizobacterial Mitigation of Drought Stress in Crop Plants: Implications for Sustainable Agriculture	Ojuederie et al., 2019	Abiotic stresses arising from climate change negates crop growth and yield, leading to food insecurity. Drought causes oxidative stress on plants, arising from excessive production of reactive oxygen species (ROS) due to inadequate CO2, which disrupts the photosynthetic machinery of plants. The use of conventional methods for the development of drought-tolerant crops is time-consuming, and the fu…	Rejected	review
"DREB2" "Drought stress" "PGPR"	Google Scholar	Alteration in expression level of some growth and stress‑related genes after rhizobacteria inoculation to alleviate drought tolerance in sensitive rice genotype	Omar et al., 2021	Background: Drought stress is one of the major abiotic stresses that adversely affect rice production. Four rice genotypes, Giza177, IR64 (as sensitive genotypes) and Vandana, Orabi3 (as tolerant genotypes) were used to screen and characterize the soil microbes associated with each genotype under drought stress. Results: The soil microbes associated with the tolerant genotypes showed high drought…	Rejected	no DREB2 expression
"DREB2" "Drought stress" "PGPR"	Google Scholar	An Update on Biotechnological Approaches for Improving Abiotic Stress Tolerance in Tomato	Pandey et al., 2011	Tomato (Solanum lycopersicum L.) is the second most important vegetable crop in the world after potato (Solanum tuberosum L.), and its productivity is infl uenced by different abiotic stresses. Though cultivated tomato is moderately tolerant to various abiotic stresses, the crop losses due to unfavorable environmental conditions can be unpredictably severe. So far, several efforts have been made …	Rejected	review
"DREB2" "Drought stress" "PGPR"	Google Scholar	Environmental and Microbial Biotechnology: Recent Developments in Microbial Technologies	Prasad et al., editor, 2021		Rejected	book
"DREB2" "Drought stress" "PGPR"	Google Scholar	Plant-mediated interactions between the entomopathogenic fungus Beauveria bassiana, insect herbivores and a plant pathogen	Maya Raad, 2016		Rejected	Fungi
"DREB2" "Drought stress" "PGPR"	Google Scholar	Developing climate-resilient crops: improving plant tolerance to stress combination	Rivero et al., 2022	Global warming and climate change are driving an alarming increase in the frequency and intensity of different abiotic stresses, such as droughts, heat waves, cold snaps, and flooding, negatively affecting crop yields and causing food shortages. Climate change is also altering the composition and behavior of different insect and pathogen populations adding to yield losses worldwide. Additional co…	Rejected	no research article
"DREB2" "Drought stress" "PGPR"	Google Scholar	Understanding the potential of root microbiome influencing salt-tolerance in plants and mechanisms involved at the transcriptional and translational level	Roy et al., 2021	Soil salinity severely affects plant growth and development and imparts inevitable losses to crop productivity. Increasing the concentration of salts in the vicinity of plant roots has severe consequences at the morphological, biochemical, and molecular levels. These include loss of chlorophyll, decrease in photosynthetic rate, reduction in cell division, ROS generation, inactivation of antioxida…	Rejected	review
"DREB2" "Drought stress" "PGPR"	Google Scholar	Benchmark TM4: A Free, Open-Source System for Microarray Data Management and Analysis	Saeed et al., 2003		Rejected	book chapter
"DREB2" "Drought stress" "PGPR"	Google Scholar	An Endophytic Fungi-Based Biostimulant Modulates Volatile and Non-Volatile Secondary Metabolites and Yield of Greenhouse Basil (Ocimum basilicum L.) through Variable Mechanisms Dependent on Salinity Stress Level	Saia et al., 2021	Salinity in water and soil is one of the major environmental factors limiting the productivity of agronomic and horticultural crops. In basil (Ocimum basilicum L., Lamiaceae) and other Ocimum species, information on the plant response to mild salinity levels, often induced by the irrigation or fertigation systems, is scarce. In the present work, we tested the effectiveness of a microbial-based bi…	Rejected	Fungi
"DREB2" "Drought stress" "PGPR"	Google Scholar	Root Transcriptional and Metabolic Dynamics Induced by the Plant Growth Promoting Rhizobacterium (PGPR) Bacillus subtilis Mbi600 on Cucumber Plants	Samaras et al., 2022	Bacillus subtilis MBI600 is a commercialized plant growth-promoting bacterial species used as a biocontrol agent in many crops, controlling various plant pathogens via direct or indirect mechanisms. In the present study, a detailed transcriptomic analysis of cucumber roots upon response to the Bs MBI600 strain is provided. Differentially expressed genes (DEGs) analysis showed altered gene express…	Rejected	no DREB2 expression
"DREB2" "Drought stress" "PGPR"	Google Scholar	Prospect and Challenges for Sustainable Management of Climate Change-Associated Stresses to Soil and Plant Health by Beneficial Rhizobacteria	Sarker et al., 2021	Climate change imposes biotic and abiotic stresses on soil and plant health all across the planet. Beneficial rhizobacterial genera, such as Bacillus, Pseudomonas, Paraburkholderia, Rhizobium, Serratia, and others, are gaining popularity due to their ability to provide simultaneous nutrition and protection of plants in adverse climatic conditions. Plant growth-promoting rhizobacteria are known to…	Rejected	review
"DREB2" "Drought stress" "PGPR"	Google Scholar	Rhizobacteria Mediated Induced Systemic Tolerance in Plants: Prospects for Abiotic Stress Management	Sarma et al., 2012		Rejected	book chapter
"DREB2" "Drought stress" "PGPR"	Google Scholar	Rhizobacteria Mediated Induced Systemic Tolerance in Plants: Prospects for Abiotic Stress Management	Sarma et al., 2012		Rejected	duplication
"DREB2" "Drought stress" "PGPR"	Google Scholar	Alleviation of drought stress in mung bean by strain Pseudomonas aeruginosa GGRJ21	Sarma et al., 2014	Backgrounds and aims Mung bean (Vigna radiata (L.) R. Wilczek), a widely cultivated pulse crops in India, experiences severe drought stress during the cultivation period. Apart from the conventional plant breeding and transgenic approaches, the application of plant growthpromoting rhizobacteria (PGPR) has always been a promising approach to improve abiotic stress tolerance in crop plants. The aim…	Accepted	1. crop study 2. control 3. fold change di DREB2
"DREB2" "Drought stress" "PGPR"	Google Scholar	Recent advances in PGPR and molecular mechanisms involved in drought stress tolerance	Sati et al., 2021	Increased severity of droughts, due to anthropogenic activities and global warming has imposed a severe threat on agricultural productivity ever before. This has further advanced the need for some eco-friendly approaches to ensure global food security. In this regard, application of plant growth-promoting rhizobacteria (PGPR) can be beneficial. PGPR through various mechanisms viz. osmotic adjustm…	Rejected	NOT PEER-REVIEWED
"DREB2" "Drought stress" "PGPR"	Google Scholar	Recent Advances in PGPR and Molecular Mechanisms Involved in Drought Stress Resistance	Sati et al., 2022	Increased severity of droughts, due to anthropogenic activities and global warming, has imposed a severe threat on agricultural productivity. This has escalated the need for environmentally sustainable solutions to secure global food security. In this context, the application of plant growth-promoting rhizobacteria (PGPR) can be beneficial. PGPR through various mechanisms viz. osmotic adjustments…	Rejected	review
"DREB2" "Drought stress" "PGPR"	Google Scholar	Plant Growth Promoting Rhizobacteria for Sustainable Stress Management Volume 1: Rhizobacteria in Abiotic Stress Management	Sayyed et al. editors, 2019		Rejected	book
"DREB2" "Drought stress" "PGPR"	Google Scholar	PGPR in Agriculture: A Sustainable Approach to Increasing Climate Change Resilience.	Shah et al., 2021	Growing environmental concerns are potentially narrowing global yield capacity of agricultural systems. Climate change is themost significant problem the world is currently facing. To meet global food demand, food production must be doubled by 2050; over exploitation of arable lands using unsustainable techniques might resolve food demand issues, but they have negative environmental effects. Curr…	Rejected	review
"DREB2" "Drought stress" "PGPR"	Google Scholar	Insights into the Bacterial and Nitric Oxide-Induced Salt Tolerance in Sugarcane and Their Growth-Promoting Abilities	Sharma et al., 2021	Soil salinity causes severe environmental stress that affects agriculture production and food security throughout the world. Salt-tolerant plant-growth-promoting rhizobacteria (PGPR) and nitric oxide (NO), a distinctive signaling molecule, can synergistically assist in the alleviation of abiotic stresses and plant growth promotion, but the mechanism by which this happens is still not well known. …	Rejected	Salinity stress
"DREB2" "Drought stress" "PGPR"	Google Scholar	Microbes and Signaling Biomolecules Against Plant Stress: Strategies of Plant- Microbe Relationships for Better Survival	Sharma Editor, 2021		Rejected	book
"DREB2" "Drought stress" "PGPR"	Google Scholar	Mitigation of Abiotic Stress in Legume-Nodulating Rhizobia for Sustainable Crop Production	Sindhu et al., 2020	Rhizobia form nitrogen-fixing nodules on leguminous plants and convert atmospheric nitrogen to plant-utilizable ammonia resulting into increased plant growth and crop yield. The growth of crops and rhizobia is adversely affected by various abiotic stresses including high temperature, soil salinity and drought. Under saprophytic phase in the soil, freeliving rhizobial population usually declines d…	Rejected	review
"DREB2" "Drought stress" "PGPR"	Google Scholar	Cold stress alleviation using individual and combined inoculation of ACC deaminase producing microbes in Ocimum sanctum	Singh et al., 2020	Cold stress in Ocimum sanctum is a major constraint to crop productivity in certain geographical regions. The current study was carried out to examine the effect of consortia of ACC deaminase producing microbes in reducing cold-induced damage in O. sanctum during winters to enable farmers to have O. sanctum as multi-cut crop. The effect of single and combined inoculation of ACC-deaminase producin…	Rejected	ACC deaminase
"DREB2" "Drought stress" "PGPR"	Google Scholar	Microbiological Activity for Soil and Plant Health Management	Soni et al. editors, 2021		Rejected	book
"DREB2" "Drought stress" "PGPR"	Google Scholar	Burkholderia phytofirmans PsJN reduces impact of freezing temperatures on photosynthesis in Arabidopsis thaliana	Su et al., 2015	Several plant growth-promoting rhizobacteria (PGPR) are known to improve plant tolerance to multiple stresses , including low temperatures. However, mechanisms underlying this protection are still poorly understood. The aim of this study was to evaluate the role of the endophytic PGPR, Burkholderia phytofirmans strain PsJN (BpPsJN), on Arabidopsis thaliana cold tolerance using photosynthesis para…	Rejected	no DREB2 expression
"DREB2" "Drought stress" "PGPR"	Google Scholar	A multifaceted rhizobacterium Bacillus licheniformis functions as a fungal antagonist and a promoter of plant growth and abiotic stress tolerance	Sukkasem et al., 2018	Plant-growth-promoting rhizobacteria play a beneficial role in plant growth through various mechanisms. In this study, an isolated rhizobacterial strain, Bacillus licheniformis CH102 (hereafter CH102), exhibited antifungal activity and harbored genes required for lantibiotic and 2,3-butanediol production. In Arabidopsis, increased root hair number and fresh weight were obtained in the CH102-inocu…	Rejected	no fold change of DREB2
"DREB2" "Drought stress" "PGPR"	Google Scholar	Burkholderia phytofirmans PsJN Primes Vitis vinifera L. and Confers a Better Tolerance to Low Non freezing Temperatures	Theocharis et al., 2012	Several endophytic bacteria reportedly induce resistance to biotic stress and abiotic stress tolerance in several plant species. Burkholderia phytofirmans PsJN is a plant-growthpromoting rhizobacterium (PGPR) that is able to colonize grapevine tissues and induce resistance to gray mold. Further, PsJN induces physiological changes that increase grapevine tolerance to low nonfreezing temperatures. …	Rejected	no crop
"DREB2" "Drought stress" "PGPR"	Google Scholar	Physiological and molecular changes in plants grown at low temperatures	Theocharis et al., 2012	Apart from water availability, low temperature is the most important environmental factor limiting the productivity and geographical distribution of plants across the world. To cope with cold stress, plant species have evolved several physiological and molecular adaptations to maximize cold tolerance by adjusting their metabolism. The regulation of some gene products represents an additional mech…	Rejected	review
"DREB2" "Drought stress" "PGPR"	Google Scholar	Physiological responses of Burkholderia phytofirmans strain PsJN colonized plantlets of grapevine (Vitis vinifera L.) to low non-freezing temperatures	Theocharis, 2010	Burkholderia phytofirmans strain PsJN has been well characterized as a Plant Growth Promoting Rhizobacteria (PGPR) that triggers induced resistance in grapevine against fungal pathogens. Recently, it has been demonstrated that B. phytofirmans may also enhance resistance to stress in low non-freezing temperatures. To better understand the interaction between grapevine and B. phytofirmans strain Ps…	Rejected	thesis
"DREB2" "Drought stress" "PGPR"	Google Scholar	Regulation of Drought-Responsive Gene Expression in Glycine max L. Merrill is Mediated Through Pseudomonas simiae Strain AU	Vaishnav et al., 2019	Plant growth promoting rhizobacteria (PGPR) have been described for sustainable agriculture practices as being a vital agent for abiotic and biotic stress mitigation and growth promotion in plants. In the present research, the authors emphasize the role of drought tolerant PGPR namely, Pseudomonas simiae strain AU, in protection of soybean plants by modulating the gene expression profile and phyt…	Accepted	1. crop study 2. presence of a control 3. stetistical analysis 4. fold change di DREB2
"DREB2" "Drought stress" "PGPR"	Google Scholar	Endophytic Bacteria in Plant Salt Stress Tolerance: Current and Future Prospects	Vaishnav et al., 2019	Soil salinity is a major limiting factor for crop productivity worldwide and is continuously increasing owing to climate change. A wide range of studies and practices have been performed to induce salt tolerance mechanisms in plants, but their result in crop improvement has been limited due to lack of time and money. In the current scenario, there is increasing attention towards habitat-imposed p…	Rejected	review
"DREB2" "Drought stress" "PGPR"	Google Scholar	Genetically Modified Sugarcane Intercropping Soybean Impact on Rhizosphere Bacterial Communities and Co-occurrence Patterns	Wei et al., 2021	Strategies involving genes in the dehydration-responsive element binding (DREB) family, which participates in drought stress regulation, and intercropping with legumes are becoming prominent options in promoting sustainable sugarcane cultivation. An increasing number of studies focusing on root interactions in intercropping systems, particularly involving transgenic crops, are being conducted to …	Rejected	no fold change of DREB2
"DREB2" "Drought stress" "PGPR"	Google Scholar	Current Trends in Microbial Biotechnology for Sustainable Agriculture, Environmental and Microbial Biotechnology	Yadav et al. editors, 2021		Rejected	book
"DREB2" "Drought stress" "PGPR"	Google Scholar	Molecular mechanism of drought tolerance in wheat	Zahoor et al., 2020		Rejected	book chapter
"DREB2" "Drought stress" "PGPR"	Google Scholar	Effects of Drought-Tolerant Ea-DREB2B Transgenic Sugarcane on Bacterial Communities in Soil	Zhao et al., 2020	Drought is a major abiotic stress affecting plant growth and development. Sugarcane, a sugar crop planted in warmer climate, suffers dramatically from drought stress. Bacterial communities colonizing the rhizosphere, where roots sense drought stress initially, have been well studied for their beneficial effects on plant growth and health. The Ea-DREB2B gene cloned from the sugarcane, Saccharum ar…	Rejected	no fold change of DREB2
"DREB2" "Drought stress" "PGPR"	Google Scholar	Neotyphodium lolii endophyte improves drought tolerance in perennial ryegrass (Lolium perenne. L) through broadly adjusting its metabolism	Zhou, 2014		Rejected	thesis
DREB2 AND drought stress AND PGPR	Scopus	Recent methods of drought stress tolerance in plants	Ali et al., 2017	In the climate change scenario the drought has been diagnosed as major stress affecting crop productivity. This review demonstrates some recent findings on the amelioration of drought stress. Nanoparticles, synthetic growth regulators viz. Trinexapac-ethyl, and Biochar addition helps to economize the water budget of plants, enhances the bioavailability of water and nutrients as well as overcomes …	Rejected	review
DREB2 AND drought stress AND PGPR	Scopus	Antioxidant, physiological and biochemical responses of drought susceptible and drought tolerant mustard (Brassica juncea L) genotypes to rhizobacterial inoculation under water deficit stress	Bandeppa et al., 2019	Response of drought susceptible (DS) genotype Pusa Karishma LES-39 and drought tolerant (DT) mustard genotype NPJ-124, to rhizobacterial inoculation under water deficit stress, was compared in the present study to determine the influence of inoculants on biochemical and physiological attributes of these two different genotypes. Inoculation was observed to improve root and shoot dry weight in both…	Rejected	duplicate
DREB2 AND drought stress AND PGPR	Scopus	Plant growth-promoting rhizobacteria enhance wheat salt and drought stress tolerance by altering endogenous phytohormone levels and TaCTR1/TaDREB2 expression	Barnawal et al., 2017	Abiotic stresses such as salt and drought represent adverse environmental conditions that significantly damage plant growth and agricultural productivity. In this study, the mechanism of the plant growth-promoting rhizobacteria (PGPR)-stimulated tolerance against abiotic stresses has been explored. Results suggest that PGPR strains, Arthrobacter protophormiae (SA3) and Dietzia natronolimnaea (STR…	Rejected	duplicate
DREB2 AND drought stress AND PGPR	Scopus	Ameliorative Effect of Humic Acid and Plant Growth-Promoting Rhizobacteria (PGPR) on Hungarian Vetch Plants under Salinity Stress	Esringü et al., 2016	Salinity is one of the major abiotic stress factors for cultivated plants, limiting their growth and productivity in many areas of the world. This study aims to determine the ameliorative effects of humic acid (HA) and plant growthpromoting bacteria (PGPR) on amino acids, enzymes, minerals, organic acids and hormones in Hungarian vetch (Vicia pannonica) plants under salinity stress conditions. Sa…	Rejected	duplicate
DREB2 AND drought stress AND PGPR	Scopus	Drought Stress in Grain Legumes during Reproduction and Grain Filling	Farooq et al., 2017	Water scarcity is a major constraint limiting grain legume production particularly in the arid and semi-arid tropics. Different climate models have predicted changes in rainfall distribution and frequent drought spells for the future. Although drought impedes the productivity of grain legumes at all growth stages, its occurrence during reproductive and grain development stages (terminal drought) …	Rejected	review
DREB2 AND drought stress AND PGPR	Scopus	Mechanisms of plant response to salt and drought stress and their alteration by rhizobacteria	Forni et al., 2017	Background Soil salinity and drought are an enormous worldwide problem for agriculture, horticulture and silviculture. The initial responses of plants to drought and salinity are similar; both are attributed to water deficit which inhibits plant growth and development. Scope In this review, an overview of the major physiological and biochemical changes that occur in plants as a consequence of sal…	Rejected	duplicate
DREB2 AND drought stress AND PGPR	Scopus	Accelerated Growth Rate and Increased Drought Stress Resilience of the Model Grass Brachypodium distachyon Colonized by Bacillus subtilis B26	Gagné-Bourque et al., 2015	Plant growth-promoting bacteria (PGB) induce positive effects in plants, for instance, increased growth and reduced abiotic stresses susceptibility. The mechanisms by which these bacteria impact the host plant are numerous, diverse and often specific. Here, we studied the agronomical, molecular and biochemical effects of the endophytic PGB Bacillus subtilis B26 on the full life cycle of Brachypod…	Rejected	duplicate
DREB2 AND drought stress AND PGPR		Exogenous Melatonin mediates the regulation of endogenous nitric oxide in Glycine max L. to reduce effects of drought stress	Imran et al., 2021	Drought stress retards plant growth and yield. Melatonin and nitric oxide (NO) have demonstrated their potential role against abiotic stresses; however, the underlying molecular mechanism by which they interact and extend drought stress tolerance has not been fully elucidated. Herein, the current study was performed to establish the optimum beneficial concentration of MT and NO in combating droug…	Rejected	duplicate
DREB2 AND drought stress AND PGPR	Scopus	Drought Stress in Grain Legumes: Effects, Tolerance Mechanisms and Management	Khatun et al., 2021	Grain legumes are important sources of proteins, essential micronutrients and vitamins and for human nutrition. Climate change, including drought, is a severe threat to grain legume production throughout the world. In this review, the morpho-physiological, physio-biochemical and molecular levels of drought stress in legumes are described. Moreover, different tolerance mechanisms, such as the morp…	Rejected	review
DREB2 AND drought stress AND PGPR	Scopus	Induced drought tolerance through wild and mutant bacterial strain Pseudomonas simiae in mung bean (Vigna radiata L.)	Kumari et al., 2016	The present study focused on the overproducing mutant of a plant growth promoting rhizobacterium (PGPR) Pseudomonas simiae strain AU (MTCC-12057) for significant drought tolerance in mung bean plants. Five mutants namely AU-M1, AU-M2, AU-M3, AU-M4 and AU-M5 were made after treatment of wild type strain with N-methyl-N-nitro-N-nitrosoguanidine. Mutant strain AUM4 was recorded for enhanced ACC deam…	Rejected	duplicate
DREB2 AND drought stress AND PGPR	Scopus	Overexpression of GmNFYA5 confers drought tolerance to transgenic Arabidopsis and soybean plants	Ma et al., 2020	Background: Crop productivity is challenged by abiotic stresses, among which drought stress is the most common. NF-Y genes, especially NF-YA genes, regulate tolerance to abiotic stress. Results: Soybean NF-Y gene GmNFYA5 was identified to have the highest transcript level among all 21 NFYA genes in soybean (Glycine max L.) under drought stress. Drought-induced transcript of GmNFYA5 was suppressed…	Rejected	duplicate
DREB2 AND drought stress AND PGPR	Scopus	Plant growth-promoting rhizobacteria Shewanella putrefaciens and Cronobacter dublinensis enhance drought tolerance of pearl millet by modulating hormones and stress-responsive genes	Manjunatha et al., 2022	Drought is a major abiotic stress that affects crop productivity. Endophytic bacteria have been found to alleviate the adverse effects of drought on plants. In the present study, we evaluated the effects of two endophytic bacteria Shewanella putrefaciens strain MCL-1 and Cronobacter dublinensis strain MKS-1 on pearl millet (Pennisetum glaucum (L.) R. Br.) under drought stress conditions. Pearl mi…	Rejected	duplicate
DREB2 AND drought stress AND PGPR	Scopus	Plant Transcriptome Reprograming and Bacterial Extracellular Metabolites Underlying Tomato Drought Resistance Triggered by a Beneficial Soil Bacteria	Morcillo et al., 2021	Water deficit is one of the major constraints to crop production and food security worldwide. Some plant growth-promoting rhizobacteria (PGPR) strains are capable of increasing plant drought resistance. Knowledge about the mechanisms underlying bacteria-induced plant drought resistance is important for PGPR applications in agriculture. In this study, we show the drought stress-mitigating effects …	Rejected	duplicate
DREB2 AND drought stress AND PGPR	Scopus	Microbial ACC-Deaminase Biotechnology: Perspectives and Applications in Stress Agriculture	Nadeem et al., 2012		Rejected	book chapter
DREB2 AND drought stress AND PGPR	Scopus	Alteration in expression level of some growth and stress‑related genes after rhizobacteria inoculation to alleviate drought tolerance in sensitive rice genotype	Omar et al., 2021	Background: Drought stress is one of the major abiotic stresses that adversely affect rice production. Four rice genotypes, Giza177, IR64 (as sensitive genotypes) and Vandana, Orabi3 (as tolerant genotypes) were used to screen and characterize the soil microbes associated with each genotype under drought stress. Results: The soil microbes associated with the tolerant genotypes showed high drought…	Rejected	duplicate
DREB2 AND drought stress AND PGPR	Scopus	Harnessing translational research in wheat for climate resilience	Reynolds et al., 2021	Despite being the world’s most widely grown crop, research investments in wheat (Triticum aestivum and Triticum durum) fall behind those in other staple crops. Current yield gains will not meet 2050 needs, and climate stresses compound this challenge. However, there is good evidence that heat and drought resilience can be boosted through translating promising ideas into novel breeding technologie…	Rejected	review
DREB2 AND drought stress AND PGPR	Scopus	Understanding the potential of root microbiome influencing salt-tolerance in plants and mechanisms involved at the transcriptional and translational level	Roy et al., 2021	Soil salinity severely affects plant growth and development and imparts inevitable losses to crop productivity. Increasing the concentration of salts in the vicinity of plant roots has severe consequences at the morphological, biochemical, and molecular levels. These include loss of chlorophyll, decrease in photosynthetic rate, reduction in cell division, ROS generation, inactivation of antioxida…	Rejected	review
DREB2 AND drought stress AND PGPR	Scopus	Metabolomics Provides Valuable Insight for the Study of Durum Wheat: A Review	Saia et al., 2019	Metabolomics is increasingly being applied in various fields offering a highly informative tool for high-throughput diagnostics. However, in plant sciences, metabolomics is underused, even though plant studies are relatively easy and cheap when compared to those on humans and animals. Despite their importance for human nutrition, cereals, and especially wheat, remain understudied from a metabolom…	Rejected	review
DREB2 AND drought stress AND PGPR	Scopus	An Endophytic Fungi-Based Biostimulant Modulates Volatile and Non-Volatile Secondary Metabolites and Yield of Greenhouse Basil (Ocimum basilicum L.) through Variable Mechanisms Dependent on Salinity Stress Level	Saia et al., 2021	Salinity in water and soil is one of the major environmental factors limiting the productivity of agronomic and horticultural crops. In basil (Ocimum basilicum L., Lamiaceae) and other Ocimum species, information on the plant response to mild salinity levels, often induced by the irrigation or fertigation systems, is scarce. In the present work, we tested the effectiveness of a microbial-based bi…	Rejected	Fungi
DREB2 AND drought stress AND PGPR	Scopus	Rhizobacteria Mediated Induced Systemic Tolerance in Plants: Prospects for Abiotic Stress Management	Sarma et al., 2012		Rejected	duplicate
DREB2 AND drought stress AND PGPR	Scopus	Alleviation of drought stress in mung bean by strain Pseudomonas aeruginosa GGRJ21	Sarma et al., 2014	Backgrounds and aims Mung bean (Vigna radiata (L.) R. Wilczek), a widely cultivated pulse crops in India, experiences severe drought stress during the cultivation period. Apart from the conventional plant breeding and transgenic approaches, the application of plant growthpromoting rhizobacteria (PGPR) has always been a promising approach to improve abiotic stress tolerance in crop plants. The aim…	Rejected	duplicate
DREB2 AND drought stress AND PGPR	Scopus	Burkholderia phytofirmans PsJN reduces impact of freezing temperatures on photosynthesis in Arabidopsis thaliana	Su et al., 2015	Several plant growth-promoting rhizobacteria (PGPR)are known to improve plant tolerance to multiple stresses , including low temperatures. However, mechanisms underlying this protection are still poorly understood. The aim of this study was to evaluate the role of the endophytic PGPR, Burkholderia phytofirmans strain PsJN (BpPsJN), on Arabidopsis thaliana cold tolerance using photosynthesis param…	Rejected	duplicate
DREB2 AND drought stress AND PGPR	Scopus	Burkholderia phytofirmans PsJN Primes Vitis vinifera L. and Confers a Better Tolerance to Low Non freezing Temperatures	Theocharis et al., 2012	Several endophytic bacteria reportedly induce resistance to biotic stress and abiotic stress tolerance in several plant species. Burkholderia phytofirmans PsJN is a plant-growthpromoting rhizobacterium (PGPR) that is able to colonize grapevine tissues and induce resistance to gray mold. Further, PsJN induces physiological changes that increase grapevine tolerance to low nonfreezing temperatures. …	Rejected	duplicate
DREB2 AND drought stress AND PGPR	Scopus	Effects of Drought-Tolerant Ea-DREB2B Transgenic Sugarcane on Bacterial Communities in Soil	Zhao et al., 2020	Drought is a major abiotic stress affecting plant growth and development. Sugarcane, a sugar crop planted in warmer climate, suffers dramatically from drought stress. Bacterial communities colonizing the rhizosphere, where roots sense drought stress initially, have been well studied for their beneficial effects on plant growth and health. The Ea-DREB2B gene cloned from the sugarcane, Saccharum ar…	Rejected	duplicate
	Review	Amelioration of drought tolerance in wheat by the interaction of plant growth-promoting rhizobacteria	Gontia‐Mishra et al., 2016	Drought stress adversely affects the growth and yield of wheat. The present study was planned to investigate the effect of inoculation of plant-growth promoting rhizobacteria (PGPR) strains IG 3 (Klebsiella sp.), IG 10 (Enterobacter ludwigii) and IG 15 (Flavobacterium sp.) in improving drought tolerance in wheat. • These PGPR strains were screened for drought tolerance in nutrient broth supplemen…	Accepted
