# Supplementary material for: Meta-analysis of plant growth-promoting rhizobacteria interaction with host plants: implications for drought stress response gene expression
Source: Front Plant Sci. 2024 Jan 15;14:1282553. doi: 10.3389/fpls.2023.1282553 (PMC10823023; doi:10.3389/fpls.2023.1282553)
Supplement: Supplementary file 25 [file Table_10.xlsx]

## Sheet: Scopus
Keywords	Search engine	Title	Autors	Abstract	Rejected/Accepted	Explenation
ALL ( dreb2 AND "drought stress" ) AND ( LIMIT-TO ( DOCTYPE , "ar" ) ) AND ( LIMIT-TO ( LANGUAGE , "English" ) ) AND ( EXCLUDE ( SUBJAREA , "MEDI" ) OR EXCLUDE ( SUBJAREA , "NEUR" ) OR EXCLUDE ( SUBJAREA , "PHAR" ) OR EXCLUDE ( SUBJAREA , "VETE" ) OR EXCLUDE ( SUBJAREA , "PHYS" ) OR EXCLUDE ( SUBJAREA , "ECON" ) OR EXCLUDE ( SUBJAREA , "NURS" ) ) AND ( LIMIT-TO ( PUBSTAGE , "final" ) ) AND ( LIMI…	Scopus	Plant growth-promoting rhizobacteria enhance wheat salt and drought stress tolerance by altering endogenous phytohormone levels and TaCTR1/TaDREB2 expression	Barnawal et al., 2017: Barnawal, D., Bharti, N., Pandey, S.S., Pandey, A., Chanotiya, C.S., Kalra, A.	Abiotic stresses such as salt and drought represent adverse environmental conditions that significantly damage plant growth and agricultural productivity. In this study, the mechanism of the plant growth-promoting rhizo-bacteria (PGPR)-stimulated tolerance against abiotic stresses has been explored. Results suggest that PGPR strains, Arthrobacter protophormiae (SA3) and Dietzia natronolimnaea (ST…	Accepted
ALL ( dreb2 AND "drought stress" ) AND ( LIMIT-TO ( DOCTYPE , "ar" ) ) AND ( LIMIT-TO ( LANGUAGE , "English" ) ) AND ( EXCLUDE ( SUBJAREA , "MEDI" ) OR EXCLUDE ( SUBJAREA , "NEUR" ) OR EXCLUDE ( SUBJAREA , "PHAR" ) OR EXCLUDE ( SUBJAREA , "VETE" ) OR EXCLUDE ( SUBJAREA , "PHYS" ) OR EXCLUDE ( SUBJAREA , "ECON" ) OR EXCLUDE ( SUBJAREA , "NURS" ) ) AND ( LIMIT-TO ( PUBSTAGE , "final" ) ) AND ( LIMI…	Scopus	Overexpression of GmNFYA5 confers drought tolerance to transgenic Arabidopsis and soybean plants	Ma et al., 2020: Ma, X.-J., Yu, T.-F., Li, X.-H., Cao, X.-Y., Ma, J., Chen, J., Zhou, Y.-B., Chen, M., Ma, Y.-Z., Zhang, J.-H., Xu, Z.-S.	Crop productivity is challenged by abiotic stresses, among which drought stress is the most common. NF-Y genes, especially NF-YA genes, regulate tolerance to abiotic stress. Results: Soybean NF-Y gene GmNFYA5 was identified to have the highest transcript level among all 21 NF-YA genes in soybean (Glycine max L.) under drought stress. Drought-induced transcript of GmNFYA5 was suppressed by the ABA…	Accepted
ALL ( dreb2 AND "drought stress" ) AND ( LIMIT-TO ( DOCTYPE , "ar" ) ) AND ( LIMIT-TO ( LANGUAGE , "English" ) ) AND ( EXCLUDE ( SUBJAREA , "MEDI" ) OR EXCLUDE ( SUBJAREA , "NEUR" ) OR EXCLUDE ( SUBJAREA , "PHAR" ) OR EXCLUDE ( SUBJAREA , "VETE" ) OR EXCLUDE ( SUBJAREA , "PHYS" ) OR EXCLUDE ( SUBJAREA , "ECON" ) OR EXCLUDE ( SUBJAREA , "NURS" ) ) AND ( LIMIT-TO ( PUBSTAGE , "final" ) ) AND ( LIMI…	Scopus	GmDREB2A;2, a canonical DEHYDRATION-RESPONSIVE ELEMENT-BINDING PROTEIN2-type transcription factor in soybean, is posttranslationally regulated and mediates DEHYDRATION-RESPONSIVE ELEMENT-dependent gene expression	Mizoi et al., 2013: Mizoi, J., Ohori, T., Moriwaki, T., Kidokoro, S., Todaka, D., Maruyama, K., Kusakabe, K., Osakabe, Y., Shinozaki, K., Yamaguchi-Shinozaki, K.	Soybean (Glycine max) is an important crop around the world. Abiotic stress conditions, such as drought and heat, adversely affect its survival, growth, and production. The DEHYDRATION-RESPONSIVE ELEMENT-BINDING PROTEIN2 (DREB2) group includes transcription factors that contribute to drought and heat stress tolerance by activating transcription through the cis-element dehydration-responsive eleme…	Rejected	Transgenic
ALL ( dreb2 AND "drought stress" ) AND ( LIMIT-TO ( DOCTYPE , "ar" ) ) AND ( LIMIT-TO ( LANGUAGE , "English" ) ) AND ( EXCLUDE ( SUBJAREA , "MEDI" ) OR EXCLUDE ( SUBJAREA , "NEUR" ) OR EXCLUDE ( SUBJAREA , "PHAR" ) OR EXCLUDE ( SUBJAREA , "VETE" ) OR EXCLUDE ( SUBJAREA , "PHYS" ) OR EXCLUDE ( SUBJAREA , "ECON" ) OR EXCLUDE ( SUBJAREA , "NURS" ) ) AND ( LIMIT-TO ( PUBSTAGE , "final" ) ) AND ( LIMI…	Scopus	Comparative transcriptome analysis of heat stress responses of Clematis lanuginosa and Clematis crassifolia	Qian et al., 2022: Qian, R., Hu, Q., Ma, X., Zhang, X., Ye, Y., Liu, H., Gao, H., Zheng, J.	Background: Clematis species are attractive ornamental plants with a variety of flower colors and patterns. Heat stress is one of the main factors restricting the growth, development, and ornamental value of Clematis. Clematis lanuginosa and Clematis crassifolia are large-flowered and evergreen Clematis species, respectively, that show different tolerance to heat stress. We compared and analyzed …	Rejected	c182557_g1
ALL ( dreb2 AND "drought stress" ) AND ( LIMIT-TO ( DOCTYPE , "ar" ) ) AND ( LIMIT-TO ( LANGUAGE , "English" ) ) AND ( EXCLUDE ( SUBJAREA , "MEDI" ) OR EXCLUDE ( SUBJAREA , "NEUR" ) OR EXCLUDE ( SUBJAREA , "PHAR" ) OR EXCLUDE ( SUBJAREA , "VETE" ) OR EXCLUDE ( SUBJAREA , "PHYS" ) OR EXCLUDE ( SUBJAREA , "ECON" ) OR EXCLUDE ( SUBJAREA , "NURS" ) ) AND ( LIMIT-TO ( PUBSTAGE , "final" ) ) AND ( LIMI…	Scopus	Arabidopsis DREB2A-interacting proteins function as Ring E3 ligases and negatively regulate plant drought stress-responsive gene expression	Qin et al., 2008: Qin, F., Sakuma, Y., Tran, L.-S.P., Maruyama, K., Kidokoro, S., Fujita, Y., Fujita, M., Umezawa, T., Sawano, Y., Miyazono, K.-I., Tanokura, M., Shinozaki, K., Yamaguchi-Shinozaki, K.	The DEHYDRATION-RESPONSIVE ELEMENT BINDING PROTEIN2A (DREB2A) transcription factor controls water deficit-inducible gene expression and requires posttranslational modification for its activation. The activation mechanism is not well understood; however, the stability of this protein in the nucleus was recently found to be important for its activation. Here, we report the isolation of Arabidopsis …	Rejected	Missing fold change
ALL ( dreb2 AND "drought stress" ) AND ( LIMIT-TO ( DOCTYPE , "ar" ) ) AND ( LIMIT-TO ( LANGUAGE , "English" ) ) AND ( EXCLUDE ( SUBJAREA , "MEDI" ) OR EXCLUDE ( SUBJAREA , "NEUR" ) OR EXCLUDE ( SUBJAREA , "PHAR" ) OR EXCLUDE ( SUBJAREA , "VETE" ) OR EXCLUDE ( SUBJAREA , "PHYS" ) OR EXCLUDE ( SUBJAREA , "ECON" ) OR EXCLUDE ( SUBJAREA , "NURS" ) ) AND ( LIMIT-TO ( PUBSTAGE , "final" ) ) AND ( LIMI…	Scopus	Impact of drought and heat stress individually and in combination on physio-biochemical parameters, antioxidant responses, and gene expression in Solanum lycopersicum	Raja et al., 2020: Raja, V., Qadir, S.U., Alyemeni, M.N., Ahmad, P.	The present study was carried out to investigate the effect of individual drought, heat, and combined drought and heat stress on tomato plants. Combined stress resulted in the higher accumulation of Proline (101.9%), MDA (38.55%), H2O2 (101.19%), and lower levels of RWC (53.84%). Individual drought and heat stress decreased photosynthetic pigments like total chlorophyll content by (45.45%) and (2…	Rejected	DREBs , no DREB2
ALL ( dreb2 AND "drought stress" ) AND ( LIMIT-TO ( DOCTYPE , "ar" ) ) AND ( LIMIT-TO ( LANGUAGE , "English" ) ) AND ( EXCLUDE ( SUBJAREA , "MEDI" ) OR EXCLUDE ( SUBJAREA , "NEUR" ) OR EXCLUDE ( SUBJAREA , "PHAR" ) OR EXCLUDE ( SUBJAREA , "VETE" ) OR EXCLUDE ( SUBJAREA , "PHYS" ) OR EXCLUDE ( SUBJAREA , "ECON" ) OR EXCLUDE ( SUBJAREA , "NURS" ) ) AND ( LIMIT-TO ( PUBSTAGE , "final" ) ) AND ( LIMI…	Scopus	Zinc Oxide Nanoparticles Enhance Drought Tolerance in Wheat via Physio-Biochemical Changes and Stress Genes Expression	Sadati et al., 2022: Sadati, S.Y.R., Godehkahriz, S.J., Ebadi, A., Sedghi, M.	Background: Drought response in plants at molecular level, aiding them to overcome the adverse effects of drought, remarkably depends on the expression of a few regulator genes and signal transduction. For reducing the drought stress, nanoparticles show great promise compared to other commonly used methods, even though the underlying mechanisms are still unknown. Objectives: This study was perfor…	Rejected	Zn-O
ALL ( dreb2 AND "drought stress" ) AND ( LIMIT-TO ( DOCTYPE , "ar" ) ) AND ( LIMIT-TO ( LANGUAGE , "English" ) ) AND ( EXCLUDE ( SUBJAREA , "MEDI" ) OR EXCLUDE ( SUBJAREA , "NEUR" ) OR EXCLUDE ( SUBJAREA , "PHAR" ) OR EXCLUDE ( SUBJAREA , "VETE" ) OR EXCLUDE ( SUBJAREA , "PHYS" ) OR EXCLUDE ( SUBJAREA , "ECON" ) OR EXCLUDE ( SUBJAREA , "NURS" ) ) AND ( LIMIT-TO ( PUBSTAGE , "final" ) ) AND ( LIMI…	Scopus	Alleviation of drought stress in mung bean by strain Pseudomonas aeruginosa GGRJ21	Sarma et al., 2014: Sarma, R.K., Saikia, R	Mung bean (Vigna radiata (L.) R. Wilczek), a widely cultivated pulse crops in India, experiences severe drought stress during the cultivation period. Apart from the conventional plant breeding and transgenic approaches, the application of plant growth-promoting rhizobacteria (PGPR) has always been a promising approach to improve abiotic stress tolerance in crop plants. The aim of the present stud…	Accepted
ALL ( dreb2 AND "drought stress" ) AND ( LIMIT-TO ( DOCTYPE , "ar" ) ) AND ( LIMIT-TO ( LANGUAGE , "English" ) ) AND ( EXCLUDE ( SUBJAREA , "MEDI" ) OR EXCLUDE ( SUBJAREA , "NEUR" ) OR EXCLUDE ( SUBJAREA , "PHAR" ) OR EXCLUDE ( SUBJAREA , "VETE" ) OR EXCLUDE ( SUBJAREA , "PHYS" ) OR EXCLUDE ( SUBJAREA , "ECON" ) OR EXCLUDE ( SUBJAREA , "NURS" ) ) AND ( LIMIT-TO ( PUBSTAGE , "final" ) ) AND ( LIMI…	Scopus	Physiological and Ascorbate -Glutathione pathway-related genes responses under drought and heat stress in crested wheatgrass	Sheikh-Mohamadi et al., 2018: Sheikh-Mohamadi, M.-H., Etemadi, N., Arab, M.M., Aalifar, M., Arab, M.	Drought and heat stress are two factors that limit the growth of cool-season plant species in many regions of the world. The objective of this experiment was to study the expression patterns of genes involved in ascorbate and glutathione pathways, while assessing the physiological responses of plants and their tolerance to drought stress and heat stress. The results of this study indicated that t…	Accepted
ALL ( dreb2 AND "drought stress" ) AND ( LIMIT-TO ( DOCTYPE , "ar" ) ) AND ( LIMIT-TO ( LANGUAGE , "English" ) ) AND ( EXCLUDE ( SUBJAREA , "MEDI" ) OR EXCLUDE ( SUBJAREA , "NEUR" ) OR EXCLUDE ( SUBJAREA , "PHAR" ) OR EXCLUDE ( SUBJAREA , "VETE" ) OR EXCLUDE ( SUBJAREA , "PHYS" ) OR EXCLUDE ( SUBJAREA , "ECON" ) OR EXCLUDE ( SUBJAREA , "NURS" ) ) AND ( LIMIT-TO ( PUBSTAGE , "final" ) ) AND ( LIMI…	Scopus	SlDREB2 gene specifically recognizing to the universal DRE elements is a transcriptional activator improving drought tolerance in tomato	Tao et al., 2022: Tao, L., Yu, G., Chen, H., Wang, B., Jiang, L., Han, X., Lin, G., Cheng, X.-G.	Plant DREB transcription factors play an important transcriptional activation role under abiotic stresses. In this study, both tomato RNAi-lines and transgenic Arabidopsis lines were evaluated to unveil whether the SlDREB2 gene functions by the transcriptional activation pathway under drought stress. The SlDREB2 gene contains a typical AP2/EREBP conserved domain and is localized to the cell nucle…	Accepted
ALL ( dreb2 AND "drought stress" ) AND ( LIMIT-TO ( DOCTYPE , "ar" ) ) AND ( LIMIT-TO ( LANGUAGE , "English" ) ) AND ( EXCLUDE ( SUBJAREA , "MEDI" ) OR EXCLUDE ( SUBJAREA , "NEUR" ) OR EXCLUDE ( SUBJAREA , "PHAR" ) OR EXCLUDE ( SUBJAREA , "VETE" ) OR EXCLUDE ( SUBJAREA , "PHYS" ) OR EXCLUDE ( SUBJAREA , "ECON" ) OR EXCLUDE ( SUBJAREA , "NURS" ) ) AND ( LIMIT-TO ( PUBSTAGE , "final" ) ) AND ( LIMI…	Scopus	Virus-Induced Gene Silencing (VIGS) in Aegilops tauschii and Its Use in Functional Analysis of AetDREB2	Tavakol, E. et al., 2018	Among the available reverse genetic approaches for studying gene function, virus-induced gene silencing (VIGS) has several advantages. It allows rapid characterization of gene function independent of stable transformation, which is basically difficult to achieve in monocots, and offers the potential to silence individual or multiple genes of a gene family. In order to establish a VIGS system in A…	Rejected
ALL ( dreb2 AND "drought stress" ) AND ( LIMIT-TO ( DOCTYPE , "ar" ) ) AND ( LIMIT-TO ( LANGUAGE , "English" ) ) AND ( EXCLUDE ( SUBJAREA , "MEDI" ) OR EXCLUDE ( SUBJAREA , "NEUR" ) OR EXCLUDE ( SUBJAREA , "PHAR" ) OR EXCLUDE ( SUBJAREA , "VETE" ) OR EXCLUDE ( SUBJAREA , "PHYS" ) OR EXCLUDE ( SUBJAREA , "ECON" ) OR EXCLUDE ( SUBJAREA , "NURS" ) ) AND ( LIMIT-TO ( PUBSTAGE , "final" ) ) AND ( LIMI…	Scopus	Growth responses and differential expression of VrDREB2A gene at different growth stages of mungbean (Vigna radiata L. Wilczek) under drought stress	Vu et al., 2021: Vu, T.T.H., Le, T.T.C., Pham, T.L.	Mungbean is an important pulse crop and is predominantly cultivated across Asia. However, its production is hampered by climate change-induced drought stress. Drought affects various morpho-physiological processes associated with growth and molecular functions. This study analyzed growth responses and VrDREB2A gene expression in two mungbean cultivars, DX208 and Tam Thanh Hoa under water deficit …	Accepted
ALL ( dreb2 AND "drought stress" ) AND ( LIMIT-TO ( DOCTYPE , "ar" ) ) AND ( LIMIT-TO ( LANGUAGE , "English" ) ) AND ( EXCLUDE ( SUBJAREA , "MEDI" ) OR EXCLUDE ( SUBJAREA , "NEUR" ) OR EXCLUDE ( SUBJAREA , "PHAR" ) OR EXCLUDE ( SUBJAREA , "VETE" ) OR EXCLUDE ( SUBJAREA , "PHYS" ) OR EXCLUDE ( SUBJAREA , "ECON" ) OR EXCLUDE ( SUBJAREA , "NURS" ) ) AND ( LIMIT-TO ( PUBSTAGE , "final" ) ) AND ( LIMI…	Scopus	Response of wheat dreb transcription factor to osmotic stress based on dna methylation	Wang et al., 2021: Wang, H., Zhu, Y., Yuan, P., Song, S., Dong, T., Chen, P., Duan, Z., Jiang, L., Lu, L., Duan, H.	Dehydration-responsive element-binding protein (DREB) plays an important role in response to osmotic stress. In this study, DREB2, DREB6 and Wdreb2 are isolated from wheat AK58, yet they belong to different types of DREB transcription factors. Under osmotic stress, the transcript expression of DREB2, DREB6 and Wdreb2 has tissue specificity and is generally higher in leaves, but their expression t…	Accepted
ALL ( dreb2 AND "drought stress" ) AND ( LIMIT-TO ( DOCTYPE , "ar" ) ) AND ( LIMIT-TO ( LANGUAGE , "English" ) ) AND ( EXCLUDE ( SUBJAREA , "MEDI" ) OR EXCLUDE ( SUBJAREA , "NEUR" ) OR EXCLUDE ( SUBJAREA , "PHAR" ) OR EXCLUDE ( SUBJAREA , "VETE" ) OR EXCLUDE ( SUBJAREA , "PHYS" ) OR EXCLUDE ( SUBJAREA , "ECON" ) OR EXCLUDE ( SUBJAREA , "NURS" ) ) AND ( LIMIT-TO ( PUBSTAGE , "final" ) ) AND ( LIMI…	Scopus	EhEm1, a novel Em-like protein from Eutrema halophilum, confers tolerance to salt and drought stresses in rice	Xiang et al., 2018: Xiang, D., Man, L.	Late embryogenesis abundant (LEA) proteins play active and significant roles in stress resistance of plants. In this work, a novel Em-like gene, EhEm1, was isolated and characterized from salt cress. Bioinformatic analysis revealed that the EhEm1 protein contained three 20-mer conserved motifs (N-motif, M-motif, and C-motif), shared high homology with Em proteins from other species, and was categ…	Rejected
ALL ( dreb2 AND "drought stress" ) AND ( LIMIT-TO ( DOCTYPE , "ar" ) ) AND ( LIMIT-TO ( LANGUAGE , "English" ) ) AND ( EXCLUDE ( SUBJAREA , "MEDI" ) OR EXCLUDE ( SUBJAREA , "NEUR" ) OR EXCLUDE ( SUBJAREA , "PHAR" ) OR EXCLUDE ( SUBJAREA , "VETE" ) OR EXCLUDE ( SUBJAREA , "PHYS" ) OR EXCLUDE ( SUBJAREA , "ECON" ) OR EXCLUDE ( SUBJAREA , "NURS" ) ) AND ( LIMIT-TO ( PUBSTAGE , "final" ) ) AND ( LIMI…	Scopus	Transgenic rice expressing a cassava (Manihot esculenta Crantz) plasma membrane gene MePMP3-2 exhibits enhanced tolerance to salt and drought stresses	Yu et al., 2016: Yu, Y., Cui, Y.C., Ren, C., Rocha, P.S.C.F., Peng, M., Xu, G.Y., Wang, M.L., Xia, X.J.	Plasma membrane proteolipid 3 (PMP3) is a class of small hydrophobic proteins found in many organisms including higher plants. Some plant PMP3 genes have been shown to respond to abiotic stresses and to participate in the processes of plant stress tolerance. In this study, we isolated the cassava (Manihot esculenta Crantz) MePMP3-2 gene and functionally characterized its role in tolerance to abio…	Accepted
ALL ( dreb2 AND "drought stress" ) AND ( LIMIT-TO ( DOCTYPE , "ar" ) ) AND ( LIMIT-TO ( LANGUAGE , "English" ) ) AND ( EXCLUDE ( SUBJAREA , "MEDI" ) OR EXCLUDE ( SUBJAREA , "NEUR" ) OR EXCLUDE ( SUBJAREA , "PHAR" ) OR EXCLUDE ( SUBJAREA , "VETE" ) OR EXCLUDE ( SUBJAREA , "PHYS" ) OR EXCLUDE ( SUBJAREA , "ECON" ) OR EXCLUDE ( SUBJAREA , "NURS" ) ) AND ( LIMIT-TO ( PUBSTAGE , "final" ) ) AND ( LIMI…	Scopus	The E3 ligase TaSAP5 alters drought stress responses by promoting the degradation of DRIP proteins	Zhang et al., 2017: Zhang, N., Yin, Y., Liu, X., Tong, S., Xing, J., Zhang, Y., Pudake, R.N., Izquierdo, E.M., Peng, H., Xin, M., Hu, Z., Ni, Z., Sun, Q., Yao, Y.	In Arabidopsis (Arabidopsis thaliana) plants growing under normal conditions, DEHYDRATION-RESPONSIVE ELEMENT BINDING PROTEIN2A (DREB2A) is present at low levels because it is ubiquitinated and destabilized by DREB2A INTERACTING PROTEIN1 (DRIP1) and DRIP2 through 26S proteasome-mediated proteolysis. Drought stress counteracts the ubiquitination and proteolysis of DREB2A, thus allowing the accumula…	Rejected	unreadable graph
ALL ( dreb2 AND "drought stress" ) AND ( LIMIT-TO ( DOCTYPE , "ar" ) ) AND ( LIMIT-TO ( LANGUAGE , "English" ) ) AND ( EXCLUDE ( SUBJAREA , "MEDI" ) OR EXCLUDE ( SUBJAREA , "NEUR" ) OR EXCLUDE ( SUBJAREA , "PHAR" ) OR EXCLUDE ( SUBJAREA , "VETE" ) OR EXCLUDE ( SUBJAREA , "PHYS" ) OR EXCLUDE ( SUBJAREA , "ECON" ) OR EXCLUDE ( SUBJAREA , "NURS" ) ) AND ( LIMIT-TO ( PUBSTAGE , "final" ) ) AND ( LIMI…	Scopus	Indole-3-acetic acid improves drought tolerance of white clover via activating auxin, abscisic acid and jasmonic acid related genes and inhibiting senescence genes	Zhang et al., 2020: Zhang, Y., Li, Y., Hassan, M.J., Li, Z., Peng, Y.	Auxin may have a positive effect on plants under drought stress. White clover is widely cultivated and often prone to water shortages. In the present study, we investigated the effects of exogenous indole - 3-acetic acid (IAA) on growth and physiological changes of white clover under drought stress condition. The contents of endogenous IAA and other hormones including ABA, CTK, JA, GA, IAA, and S…	Rejected
ALL ( dreb2 AND "drought stress" ) AND ( LIMIT-TO ( DOCTYPE , "ar" ) ) AND ( LIMIT-TO ( LANGUAGE , "English" ) ) AND ( EXCLUDE ( SUBJAREA , "MEDI" ) OR EXCLUDE ( SUBJAREA , "NEUR" ) OR EXCLUDE ( SUBJAREA , "PHAR" ) OR EXCLUDE ( SUBJAREA , "VETE" ) OR EXCLUDE ( SUBJAREA , "PHYS" ) OR EXCLUDE ( SUBJAREA , "ECON" ) OR EXCLUDE ( SUBJAREA , "NURS" ) ) AND ( LIMIT-TO ( PUBSTAGE , "final" ) ) AND ( LIMI…	Scopus	OsSCL30 overexpression reduces the tolerance of rice seedlings to low temperature, drought and salt	Zhang et al., 2022: Zhang, J., Sun, Y., Zhou, Z., Zhang, Y., Yang, Y., Zan, X., Li, X., Wan, J., Gao, X., Chen, R., Huang, Z., Li, L., Xu, Z.	Rice is one of the main food crops for the world population. Various abiotic stresses, such as low temperature, drought, and high salinity, affect rice during the entire growth period, determining its yield and quality, and even leading to plant death. In this study, by constructing overexpression vectors D-163 + 1300:OsSCL30 and D-163 + 1300-AcGFP:OsSCL30-GFP, the mechanism of action of OsSCL30 …	Accepted
ALL ( dreb2 AND "drought stress" ) AND ( LIMIT-TO ( DOCTYPE , "ar" ) ) AND ( LIMIT-TO ( LANGUAGE , "English" ) ) AND ( EXCLUDE ( SUBJAREA , "MEDI" ) OR EXCLUDE ( SUBJAREA , "NEUR" ) OR EXCLUDE ( SUBJAREA , "PHAR" ) OR EXCLUDE ( SUBJAREA , "VETE" ) OR EXCLUDE ( SUBJAREA , "PHYS" ) OR EXCLUDE ( SUBJAREA , "ECON" ) OR EXCLUDE ( SUBJAREA , "NURS" ) ) AND ( LIMIT-TO ( PUBSTAGE , "final" ) ) AND ( LIMI…	Scopus	γ-Aminobutyric Acid (GABA) Priming Improves Seed Germination and Seedling Stress Tolerance Associated With Enhanced Antioxidant Metabolism, DREB Expression, and Dehydrin Accumulation in White Clover Under Water Stress	Zhou et al., 2021: Zhou, M., Hassan, M.J., Peng, Y., Liu, L., Liu, W., Zhang, Y., Li, Z.	As an important plant growth regulator, the role of γ-aminobutyric acid (GABA) in regulating seeds germination was less well elucidated under water stress. The present study was conducted to investigate the impact of GABA pretreatment on seeds germination of white clover (Trifolium repens) under water deficient condition. Results demonstrated that seeds pretreated with 2μmol/l GABA significantly …	Rejected
ALL ( dreb2 AND "drought stress" ) AND ( LIMIT-TO ( DOCTYPE , "ar" ) ) AND ( LIMIT-TO ( LANGUAGE , "English" ) ) AND ( EXCLUDE ( SUBJAREA , "MEDI" ) OR EXCLUDE ( SUBJAREA , "NEUR" ) OR EXCLUDE ( SUBJAREA , "PHAR" ) OR EXCLUDE ( SUBJAREA , "VETE" ) OR EXCLUDE ( SUBJAREA , "PHYS" ) OR EXCLUDE ( SUBJAREA , "ECON" ) OR EXCLUDE ( SUBJAREA , "NURS" ) ) AND ( LIMIT-TO ( PUBSTAGE , "final" ) ) AND ( LIMI…	Scopus	Molecular cloning and functional analysis of lotus salt-induced NnDREB2C, NnPIP1-2 and NnPIP2-1 in Arabidopsis thaliana	Ziyuan et al., 2020: Ziyuan, L., Chunfei, W., Jianjun, Y., Xian, L., Liangjun, L., Libao, C., Shuyan, L.	Dehydration-responsive element bindings transcription factor (DREBs) and plasma membrane intrinsic proteins (PIPs) have been characterized multi-functions in plant growth and metabolism, as well as in the adaptation to various stresses. In this study, we cloned the full-length cDNA of NnDREB2C from a salt-tolerated lotus species with RT-PCR methods. Analysis of qRT-PCR demonstrated that NnDREB2C …	Rejected
ALL ( dreb2 AND "drought stress" ) AND ( LIMIT-TO ( DOCTYPE , "ar" ) ) AND ( LIMIT-TO ( LANGUAGE , "English" ) ) AND ( EXCLUDE ( SUBJAREA , "MEDI" ) OR EXCLUDE ( SUBJAREA , "NEUR" ) OR EXCLUDE ( SUBJAREA , "PHAR" ) OR EXCLUDE ( SUBJAREA , "VETE" ) OR EXCLUDE ( SUBJAREA , "PHYS" ) OR EXCLUDE ( SUBJAREA , "ECON" ) OR EXCLUDE ( SUBJAREA , "NURS" ) ) AND ( LIMIT-TO ( PUBSTAGE , "final" ) ) AND ( LIMI…	Scopus	Distinctive Physio-Biochemical Properties and Transcriptional Changes Unfold the Mungbean Cultivars Differing by Their Response to Drought Stress at Flowering Stage	Ariharasutharsan et al., 2022: Ariharasutharsan, G., Karthikeyan, A., Renganathan, V.G., Marthandan, V., Dhasarathan, M., Ambigapathi, A., Akilan, M., Palaniyappan, S., Mariyammal, I., Pandiyan, M., Senthil, N.	Mungbean is a nutritionally and economically important pulse crop cultivated around Asia, mainly in India. The crop is sensitive to drought at various developmental stages of its growing period. However, there is limited or almost no research on a comparative evaluation of mung-bean plants at the flowering stage under drought conditions. Hence, the aim of this research was to impose the drought s…	Accepted
ALL ( dreb2 AND "drought stress" ) AND ( LIMIT-TO ( DOCTYPE , "ar" ) ) AND ( LIMIT-TO ( LANGUAGE , "English" ) ) AND ( EXCLUDE ( SUBJAREA , "MEDI" ) OR EXCLUDE ( SUBJAREA , "NEUR" ) OR EXCLUDE ( SUBJAREA , "PHAR" ) OR EXCLUDE ( SUBJAREA , "VETE" ) OR EXCLUDE ( SUBJAREA , "PHYS" ) OR EXCLUDE ( SUBJAREA , "ECON" ) OR EXCLUDE ( SUBJAREA , "NURS" ) ) AND ( LIMIT-TO ( PUBSTAGE , "final" ) ) AND ( LIMI…	Scopus	Physiological and Molecular Insights to Drought Responsiveness in Erianthus spp.	Augustine et al., 2015: Augustine, S.M., Syamaladevi, D.P., Premachandran, M.N., Ravichandran, V., Subramonian, N.	Erianthus is a wild relative of the genus Saccharum. It is well known for its high fibre, high biomass, tolerance to drought and water logging, pest and disease resistance with multi-ratooning ability. This study was conducted to investigate physiological and molecular responses of Erianthus spp. to drought stress. Out of seven Erianthus accessions screened, the drought responsiveness of the broa…	Rejected
ALL ( dreb2 AND "drought stress" ) AND ( LIMIT-TO ( DOCTYPE , "ar" ) ) AND ( LIMIT-TO ( LANGUAGE , "English" ) ) AND ( EXCLUDE ( SUBJAREA , "MEDI" ) OR EXCLUDE ( SUBJAREA , "NEUR" ) OR EXCLUDE ( SUBJAREA , "PHAR" ) OR EXCLUDE ( SUBJAREA , "VETE" ) OR EXCLUDE ( SUBJAREA , "PHYS" ) OR EXCLUDE ( SUBJAREA , "ECON" ) OR EXCLUDE ( SUBJAREA , "NURS" ) ) AND ( LIMIT-TO ( PUBSTAGE , "final" ) ) AND ( LIMI…	Scopus	Genome-wide analysis of the AP2/ERF family in eucalyptus grandis: An intriguing over-representation of stress-responsive	Cao et al., 2015: Cao, P.B., Azar, S., SanClemente, H., Mounet, F., Dunand, C., Marque, G., Marque, C., Teulieères, C.	The AP2/ERF family includes a large number of developmentally and physiologically important transcription factors sharing an AP2 DNA-binding domain. Among them DREB1/CBF and DREB2 factors are known as master regulators respectively of cold and heat/osmotic stress responses. Experimental Approaches The manual annotation of AP2/ERF family from Eucalyptus grandis, Malus, Populus and Vitis genomes al…	Rejected	no SD or SE
ALL ( dreb2 AND "drought stress" ) AND ( LIMIT-TO ( DOCTYPE , "ar" ) ) AND ( LIMIT-TO ( LANGUAGE , "English" ) ) AND ( EXCLUDE ( SUBJAREA , "MEDI" ) OR EXCLUDE ( SUBJAREA , "NEUR" ) OR EXCLUDE ( SUBJAREA , "PHAR" ) OR EXCLUDE ( SUBJAREA , "VETE" ) OR EXCLUDE ( SUBJAREA , "PHYS" ) OR EXCLUDE ( SUBJAREA , "ECON" ) OR EXCLUDE ( SUBJAREA , "NURS" ) ) AND ( LIMIT-TO ( PUBSTAGE , "final" ) ) AND ( LIMI…	Scopus	Allantoate amidohydrolase transcript expression is independent of drought tolerance in soybean	Charlson et al., 2009: Charlson, D.V., Korth, K.L., Purcell, L.C.	Drought is a limiting factor for N2 fixation in soybean [Glycine max (L.) Merr.] thereby resulting in reduced biomass accumulation and yield. Drought-sensitive genotypes accumulate ureides, a product of N2 fixation, during drought stress; however, drought-tolerant genotypes have lower shoot ureide concentrations, which appear to alleviate drought stress on N 2 fixation. A key enzyme involved in u…	Rejected
ALL ( dreb2 AND "drought stress" ) AND ( LIMIT-TO ( DOCTYPE , "ar" ) ) AND ( LIMIT-TO ( LANGUAGE , "English" ) ) AND ( EXCLUDE ( SUBJAREA , "MEDI" ) OR EXCLUDE ( SUBJAREA , "NEUR" ) OR EXCLUDE ( SUBJAREA , "PHAR" ) OR EXCLUDE ( SUBJAREA , "VETE" ) OR EXCLUDE ( SUBJAREA , "PHYS" ) OR EXCLUDE ( SUBJAREA , "ECON" ) OR EXCLUDE ( SUBJAREA , "NURS" ) ) AND ( LIMIT-TO ( PUBSTAGE , "final" ) ) AND ( LIMI…	Scopus	Gene Expression Profiling in Sugarcane Genotypes During Drought Stress and Rehydration	Devi et al., 2019: Devi, K., Prathima, P.T., Gomathi, R., Manimekalai, R., Lakshmi, K., Selvi, A.	The study aimed to assess the molecular responses of sugarcane genotypes exposed to water stress and rehydration. Six sugarcane varieties that show differential tolerance to drought were planted in the pots with three replications and subjected to gradual drought by withholding water for 2, 6 and 10 days and rehydration for 2, 6 and 10 days after the onset of treatment (DAT) at 60 days after plan…	Accepted
ALL ( dreb2 AND "drought stress" ) AND ( LIMIT-TO ( DOCTYPE , "ar" ) ) AND ( LIMIT-TO ( LANGUAGE , "English" ) ) AND ( EXCLUDE ( SUBJAREA , "MEDI" ) OR EXCLUDE ( SUBJAREA , "NEUR" ) OR EXCLUDE ( SUBJAREA , "PHAR" ) OR EXCLUDE ( SUBJAREA , "VETE" ) OR EXCLUDE ( SUBJAREA , "PHYS" ) OR EXCLUDE ( SUBJAREA , "ECON" ) OR EXCLUDE ( SUBJAREA , "NURS" ) ) AND ( LIMIT-TO ( PUBSTAGE , "final" ) ) AND ( LIMI…	Scopus	Insight into the AP2/ERF transcription factor superfamily in sesame and expression profiling of DREB subfamily under drought stress	Dossa et al., 2016: Dossa, K., Wei, X., Li, D., Fonceka, D., Zhang, Y., Wang, L., Yu, J., Boshou, L., Diouf, D., Cissé, N., Zhang, X.	Sesame is an important oilseed crop mainly grown in inclement areas with high temperatures and frequent drought. Thus, drought constitutes one of the major constraints of its production. The AP2/ERF is a large family of transcription factors known to play significant roles in various plant processes including biotic and abiotic stress responses. Despite their importance, little is known about ses…	Rejected	no control
ALL ( dreb2 AND "drought stress" ) AND ( LIMIT-TO ( DOCTYPE , "ar" ) ) AND ( LIMIT-TO ( LANGUAGE , "English" ) ) AND ( EXCLUDE ( SUBJAREA , "MEDI" ) OR EXCLUDE ( SUBJAREA , "NEUR" ) OR EXCLUDE ( SUBJAREA , "PHAR" ) OR EXCLUDE ( SUBJAREA , "VETE" ) OR EXCLUDE ( SUBJAREA , "PHYS" ) OR EXCLUDE ( SUBJAREA , "ECON" ) OR EXCLUDE ( SUBJAREA , "NURS" ) ) AND ( LIMIT-TO ( PUBSTAGE , "final" ) ) AND ( LIMI…	Scopus	Transcriptomic, biochemical and physio-anatomical investigations shed more light on responses to drought stress in two contrasting sesame genotypes	Dossa et al., 2017: Dossa, K., Li, D., Wang, L., Zheng, X., Liu, A., Yu, J., Wei, X., Zhou, R., Fonceka, D., Diouf, D., Liao, B., Cissé, N., Zhang, X.	Sesame is an important oilseed crop with a high oil quality. It is prone to drought stress in the arid and semi-arid areas where it is widely grown. This study aims to decipher the response of tolerant (DT) and sensitive (DS) genotypes to progressive drought based on transcriptome, biochemical and physio-anatomical characterizations. Results indicated that under severe stress, DT relied on a well…	Rejected
ALL ( dreb2 AND "drought stress" ) AND ( LIMIT-TO ( DOCTYPE , "ar" ) ) AND ( LIMIT-TO ( LANGUAGE , "English" ) ) AND ( EXCLUDE ( SUBJAREA , "MEDI" ) OR EXCLUDE ( SUBJAREA , "NEUR" ) OR EXCLUDE ( SUBJAREA , "PHAR" ) OR EXCLUDE ( SUBJAREA , "VETE" ) OR EXCLUDE ( SUBJAREA , "PHYS" ) OR EXCLUDE ( SUBJAREA , "ECON" ) OR EXCLUDE ( SUBJAREA , "NURS" ) ) AND ( LIMIT-TO ( PUBSTAGE , "final" ) ) AND ( LIMI…	Scopus	VaCPK20, a calcium-dependent protein kinase gene of wild grapevine Vitis amurensis Rupr., mediates cold and drought stress tolerance	Dubrovina et al., 2015: Dubrovina, A.S., Kiselev, K.V., Khristenko, V.S., Aleynova, O.A.	Abiotic stresses, such as drought, salinity, cold and heat, are major environmental factors that limit crop productivity. Vitis amurensis Rupr. is a wild grapevine species displaying a high level of abiotic and biotic stress resistance. Protein kinases, including Ca2+-dependent protein kinases (CDPKs), are known to mediate plant acclimation to various environmental changes. However, the functions…	Rejected	no crops
ALL ( dreb2 AND "drought stress" ) AND ( LIMIT-TO ( DOCTYPE , "ar" ) ) AND ( LIMIT-TO ( LANGUAGE , "English" ) ) AND ( EXCLUDE ( SUBJAREA , "MEDI" ) OR EXCLUDE ( SUBJAREA , "NEUR" ) OR EXCLUDE ( SUBJAREA , "PHAR" ) OR EXCLUDE ( SUBJAREA , "VETE" ) OR EXCLUDE ( SUBJAREA , "PHYS" ) OR EXCLUDE ( SUBJAREA , "ECON" ) OR EXCLUDE ( SUBJAREA , "NURS" ) ) AND ( LIMIT-TO ( PUBSTAGE , "final" ) ) AND ( LIMI…	Scopus	Differences in the drought stress response of DREB2 and CAT1 genes and evaluation of related physiological parameters in some bread wheat cultivars	Eftekhari et al., 2017: Eftekhari, A., Baghizadeh, A., Yaghoobi, M.M., Abdolshahi, R.	Abiotic stresses such as drought are among the most significant environmental stress causes in economically important crop plants including wheat (Triticum aestivum L.) and improving their yield is a major goal of plant breeding. In this study, we analysed expression of dehydration responsive element binding factor (DREB2), and an important antioxidant enzyme gene CAT1 in flag leaf of three bread…	Accepted
ALL ( dreb2 AND "drought stress" ) AND ( LIMIT-TO ( DOCTYPE , "ar" ) ) AND ( LIMIT-TO ( LANGUAGE , "English" ) ) AND ( EXCLUDE ( SUBJAREA , "MEDI" ) OR EXCLUDE ( SUBJAREA , "NEUR" ) OR EXCLUDE ( SUBJAREA , "PHAR" ) OR EXCLUDE ( SUBJAREA , "VETE" ) OR EXCLUDE ( SUBJAREA , "PHYS" ) OR EXCLUDE ( SUBJAREA , "ECON" ) OR EXCLUDE ( SUBJAREA , "NURS" ) ) AND ( LIMIT-TO ( PUBSTAGE , "final" ) ) AND ( LIMI…	Scopus	Infection with an asymptomatic virus in rice results in a delayed drought response	Encabo et al., 2020: Encabo, J.R., Macalalad-Cabral, R.J.A., Matres, J.M.K., Coronejo, S.C.T.P., Jonson, G.B., Kishima, Y., Henry, A., Choi, I.-R.	Infection of viruses in plants often modifies plant responses to biotic and abiotic stresses. In the present study we examined the effects of Rice tungro spherical virus (RTSV) infection on drought response in rice. RTSV infection delayed the onset of leaf rolling by 1-2 days. During the delay in drought response, plants infected with RTSV showed higher stomatal conductance and less negative leaf…	Rejected	Biotic stress: Virus
ALL ( dreb2 AND "drought stress" ) AND ( LIMIT-TO ( DOCTYPE , "ar" ) ) AND ( LIMIT-TO ( LANGUAGE , "English" ) ) AND ( EXCLUDE ( SUBJAREA , "MEDI" ) OR EXCLUDE ( SUBJAREA , "NEUR" ) OR EXCLUDE ( SUBJAREA , "PHAR" ) OR EXCLUDE ( SUBJAREA , "VETE" ) OR EXCLUDE ( SUBJAREA , "PHYS" ) OR EXCLUDE ( SUBJAREA , "ECON" ) OR EXCLUDE ( SUBJAREA , "NURS" ) ) AND ( LIMIT-TO ( PUBSTAGE , "final" ) ) AND ( LIMI…	Scopus	Accelerated growth rate and increased drought stress resilience of the model grass brachypodium distachyon colonized by bacillus subtilis B26	Gagné-Bourque et al., 2015: Gagné-Bourque, F., Mayer, B.F., Charron, J.-B., Vali, H., Bertrand, A., Jabaji, S.	Plant growth-promoting bacteria (PGB) induce positive effects in plants, for instance, increased growth and reduced abiotic stresses susceptibility. The mechanisms by which these bacteria impact the host plant are numerous, diverse and often specific. Here, we studied the agronomical, molecular and biochemical effects of the endophytic PGB Bacillus subtilis B26 on the full life cycle of Brachypod…	Rejected
ALL ( dreb2 AND "drought stress" ) AND ( LIMIT-TO ( DOCTYPE , "ar" ) ) AND ( LIMIT-TO ( LANGUAGE , "English" ) ) AND ( EXCLUDE ( SUBJAREA , "MEDI" ) OR EXCLUDE ( SUBJAREA , "NEUR" ) OR EXCLUDE ( SUBJAREA , "PHAR" ) OR EXCLUDE ( SUBJAREA , "VETE" ) OR EXCLUDE ( SUBJAREA , "PHYS" ) OR EXCLUDE ( SUBJAREA , "ECON" ) OR EXCLUDE ( SUBJAREA , "NURS" ) ) AND ( LIMIT-TO ( PUBSTAGE , "final" ) ) AND ( LIMI…	Scopus	Function of the auxin-responsive gene TaSAUR75 under salt and drought stress	Guo et al., 2018: Guo, Y., Jiang, Q., Hu, Z., Sun, X., Fan, S., Zhang, H.	Small auxin-upregulated RNAs (SAURs) are genes regulated by auxin and environmental factors. In this study, we identified a SAUR gene in wheat, TaSAUR75. Under salt stress, TaSAUR75 is downregulated in wheat roots. Subcellular localization revealed that TaSAUR75 was localized in both the cytoplasm and nucleus. Overexpression of TaSAUR75 increased drought and salt tolerance in Arabidopsis. Transge…	Rejected
ALL ( dreb2 AND "drought stress" ) AND ( LIMIT-TO ( DOCTYPE , "ar" ) ) AND ( LIMIT-TO ( LANGUAGE , "English" ) ) AND ( EXCLUDE ( SUBJAREA , "MEDI" ) OR EXCLUDE ( SUBJAREA , "NEUR" ) OR EXCLUDE ( SUBJAREA , "PHAR" ) OR EXCLUDE ( SUBJAREA , "VETE" ) OR EXCLUDE ( SUBJAREA , "PHYS" ) OR EXCLUDE ( SUBJAREA , "ECON" ) OR EXCLUDE ( SUBJAREA , "NURS" ) ) AND ( LIMIT-TO ( PUBSTAGE , "final" ) ) AND ( LIMI…	Scopus	Overexpression of SgDREB2C from Stylosanthes guianensis Leads to Increased Drought Tolerance in Transgenic Arabidopsis	Han et al., 2022: Han, Y., Xiang, L., Song, Z., Lu, S.	Stylosanthes guianensis is an excellent forage legume in subtropical and tropical regions with drought tolerance, but little is known about its drought tolerance mechanism. Dehydration responsive element binding proteins (DREBs) are responsive to abiotic stresses. A SgDREB2C was cloned from S. guianensis, while SgDREB2C protein was localized at nucleus. SgDREB2C transcript was induced by dehydrat…	Rejected
ALL ( dreb2 AND "drought stress" ) AND ( LIMIT-TO ( DOCTYPE , "ar" ) ) AND ( LIMIT-TO ( LANGUAGE , "English" ) ) AND ( EXCLUDE ( SUBJAREA , "MEDI" ) OR EXCLUDE ( SUBJAREA , "NEUR" ) OR EXCLUDE ( SUBJAREA , "PHAR" ) OR EXCLUDE ( SUBJAREA , "VETE" ) OR EXCLUDE ( SUBJAREA , "PHYS" ) OR EXCLUDE ( SUBJAREA , "ECON" ) OR EXCLUDE ( SUBJAREA , "NURS" ) ) AND ( LIMIT-TO ( PUBSTAGE , "final" ) ) AND ( LIMI…	Scopus	Roles of dehydrin genes in wheat tolerance to drought stress	Hassan et al., 2015: Hassan, N.M., El-Bastawisy, Z.M., El-Sayed, A.K., Ebeed, H.T., Nemat Alla, M.M.	Physiological parameters and expression levels of drought related genes were analyzed in early vegetative stage of two bread wheat cultivars (Sids and Gmiza) differ in drought tolerance capacity. Both cultivars were imposed to gradual water depletion started on day 17 till day 32 after sowing. Sids, the more tolerant cultivar to drought showed higher fresh and dry weights than the drought sensiti…	Rejected	DREBs
ALL ( dreb2 AND "drought stress" ) AND ( LIMIT-TO ( DOCTYPE , "ar" ) ) AND ( LIMIT-TO ( LANGUAGE , "English" ) ) AND ( EXCLUDE ( SUBJAREA , "MEDI" ) OR EXCLUDE ( SUBJAREA , "NEUR" ) OR EXCLUDE ( SUBJAREA , "PHAR" ) OR EXCLUDE ( SUBJAREA , "VETE" ) OR EXCLUDE ( SUBJAREA , "PHYS" ) OR EXCLUDE ( SUBJAREA , "ECON" ) OR EXCLUDE ( SUBJAREA , "NURS" ) ) AND ( LIMIT-TO ( PUBSTAGE , "final" ) ) AND ( LIMI…	Scopus	Small family, big impact: In silico analysis of DREB2 transcription factor family in rice	Herath, V. 2016	Dehydration-responsive element- (DREB) proteins are considered as the master regulators of plant abiotic stress responses including drought, salinity and cold. They are also involved in other developmental processes such as embryo and endosperm development. DREB family of transcription factors consist of two sub families namely CBF1/DREB1 and DREB2. In this study, a genome-wide in silico analysis…	Rejected
ALL ( dreb2 AND "drought stress" ) AND ( LIMIT-TO ( DOCTYPE , "ar" ) ) AND ( LIMIT-TO ( LANGUAGE , "English" ) ) AND ( EXCLUDE ( SUBJAREA , "MEDI" ) OR EXCLUDE ( SUBJAREA , "NEUR" ) OR EXCLUDE ( SUBJAREA , "PHAR" ) OR EXCLUDE ( SUBJAREA , "VETE" ) OR EXCLUDE ( SUBJAREA , "PHYS" ) OR EXCLUDE ( SUBJAREA , "ECON" ) OR EXCLUDE ( SUBJAREA , "NURS" ) ) AND ( LIMIT-TO ( PUBSTAGE , "final" ) ) AND ( LIMI…	Scopus	SlDREB2, a tomato dehydration-responsive element-binding 2 transcription factor, mediates salt stress tolerance in tomato and Arabidopsis	Hichri et al., 2016: Hichri, I., Muhovski, Y., Clippe, A., Žižková, E., Dobrev, P.I., Motyka, V., Lutts, S.	To counter environmental cues, cultivated tomato (Solanum lycopersicumL.) has evolved adaptive mechanisms requiring regulation of downstream genes. The dehydration-responsive element-binding protein 2 (DREB2) transcription factors regulate abiotic stresses responses in plants. Herein, we isolated a novel DREB2-type regulator involved in salinity response, named SlDREB2. Spatio-temporal expression…	Rejected
ALL ( dreb2 AND "drought stress" ) AND ( LIMIT-TO ( DOCTYPE , "ar" ) ) AND ( LIMIT-TO ( LANGUAGE , "English" ) ) AND ( EXCLUDE ( SUBJAREA , "MEDI" ) OR EXCLUDE ( SUBJAREA , "NEUR" ) OR EXCLUDE ( SUBJAREA , "PHAR" ) OR EXCLUDE ( SUBJAREA , "VETE" ) OR EXCLUDE ( SUBJAREA , "PHYS" ) OR EXCLUDE ( SUBJAREA , "ECON" ) OR EXCLUDE ( SUBJAREA , "NURS" ) ) AND ( LIMIT-TO ( PUBSTAGE , "final" ) ) AND ( LIMI…	Scopus	A transcriptional repressor of the ERF family confers drought tolerance to rice and regulates genes preferentially located on chromosome 11	Joo et al., 2013: Joo, J., Choi, H.J., Lee, Y.H., Kim, Y.-K., Song, S.I.	Plant-specific ethylene response factors (ERFs) play important roles in abiotic and biotic stress responses in plants. Using a transgenic approach, we identified two rice ERF genes, OsERF4a and OsERF10a, which conferred drought stress tolerance. In particular, OsERF4a contains a conserved ERF-associated amphiphilic repression (EAR) motif in its C-terminal region that has been shown to function as…	Rejected	ERF10
ALL ( dreb2 AND "drought stress" ) AND ( LIMIT-TO ( DOCTYPE , "ar" ) ) AND ( LIMIT-TO ( LANGUAGE , "English" ) ) AND ( EXCLUDE ( SUBJAREA , "MEDI" ) OR EXCLUDE ( SUBJAREA , "NEUR" ) OR EXCLUDE ( SUBJAREA , "PHAR" ) OR EXCLUDE ( SUBJAREA , "VETE" ) OR EXCLUDE ( SUBJAREA , "PHYS" ) OR EXCLUDE ( SUBJAREA , "ECON" ) OR EXCLUDE ( SUBJAREA , "NURS" ) ) AND ( LIMIT-TO ( PUBSTAGE , "final" ) ) AND ( LIMI…	Scopus	Genome-wide identification and expression profiling of AP2/ERF superfamily genes under stress conditions in dark jute (Corchorus olitorius L.)	Kabir et al., 2021: Kabir, S.M.T., Hossain, M.S., Bashar, K.K., Honi, U., Ahmed, B., Emdad, E.M., Alam, M.M., Haque, M.S., Islam, M.S.	The ethylene-responsive element (AP2/ERF) is one of the keys and conserved transcription factors (TF) in plants that play a vital role in regulating plant growth, development and stress response. A total of 119 CoAP2/ERF genes were identified from the dark jute genome, one of the most important bast fibre crops. Among these, 17 were AP2, 97 ERF, 4 RAV and 1 Soloist gene family. Phylogenetic analy…	Rejected	DREB2 (CoDREB-28, 29, 31 and 34)
ALL ( dreb2 AND "drought stress" ) AND ( LIMIT-TO ( DOCTYPE , "ar" ) ) AND ( LIMIT-TO ( LANGUAGE , "English" ) ) AND ( EXCLUDE ( SUBJAREA , "MEDI" ) OR EXCLUDE ( SUBJAREA , "NEUR" ) OR EXCLUDE ( SUBJAREA , "PHAR" ) OR EXCLUDE ( SUBJAREA , "VETE" ) OR EXCLUDE ( SUBJAREA , "PHYS" ) OR EXCLUDE ( SUBJAREA , "ECON" ) OR EXCLUDE ( SUBJAREA , "NURS" ) ) AND ( LIMIT-TO ( PUBSTAGE , "final" ) ) AND ( LIMI…	Scopus	Nitric oxide- induced AtAO3 differentially regulates plant defense and drought tolerance in Arabidopsis thaliana	Khan et al., 2019: Khan, M., Imran, Q.M., Shahid, M., Mun, B.-G., Lee, S.-U., Khan, M.A., Hussain, A., Lee, I.-J., Yun, B.-W.	Exposure of plants to different environmental insults instigates significant changes in the cellular redox tone driven in part by promoting the production of reactive nitrogen species. The key player, nitric oxide (NO) is a small gaseous diatomic molecule, well-known for its signaling role during stress. In this study, we focused on abscisic acid (ABA) metabolism-related genes that showed differe…	Rejected
ALL ( dreb2 AND "drought stress" ) AND ( LIMIT-TO ( DOCTYPE , "ar" ) ) AND ( LIMIT-TO ( LANGUAGE , "English" ) ) AND ( EXCLUDE ( SUBJAREA , "MEDI" ) OR EXCLUDE ( SUBJAREA , "NEUR" ) OR EXCLUDE ( SUBJAREA , "PHAR" ) OR EXCLUDE ( SUBJAREA , "VETE" ) OR EXCLUDE ( SUBJAREA , "PHYS" ) OR EXCLUDE ( SUBJAREA , "ECON" ) OR EXCLUDE ( SUBJAREA , "NURS" ) ) AND ( LIMIT-TO ( PUBSTAGE , "final" ) ) AND ( LIMI…	Scopus	Overexpression of chloroplast-localized NADPH-dependent thioredoxin reductase C (NTRC) enhances tolerance to photo-oxidative and drought stresses in Arabidopsis thaliana	Kim et al., 2017: Kim, M.R., Khaleda, L., Jung, I.J., Kim, J.Y., Lee, S.Y., Cha, J.-Y., Kim, W.-Y.	Chloroplast is a major organelle that conducts photosynthesis to produce ATP and NADPH via conversion of water to oxygen in plant. While the photosynthesis occurs, molecular oxygen easily changes to reactive oxygen species (ROS) consisting of toxic oxygen radicals resulting in oxidative stress. NADPH-dependent thioredoxin reductases (NTRs) play a pivotal role to regulate the redox state of the th…	Rejected
ALL ( dreb2 AND "drought stress" ) AND ( LIMIT-TO ( DOCTYPE , "ar" ) ) AND ( LIMIT-TO ( LANGUAGE , "English" ) ) AND ( EXCLUDE ( SUBJAREA , "MEDI" ) OR EXCLUDE ( SUBJAREA , "NEUR" ) OR EXCLUDE ( SUBJAREA , "PHAR" ) OR EXCLUDE ( SUBJAREA , "VETE" ) OR EXCLUDE ( SUBJAREA , "PHYS" ) OR EXCLUDE ( SUBJAREA , "ECON" ) OR EXCLUDE ( SUBJAREA , "NURS" ) ) AND ( LIMIT-TO ( PUBSTAGE , "final" ) ) AND ( LIMI…	Scopus	Functional characterization and expression profiling of a DREB2-type gene from lettuce (Lactuca sativa L.)	Kudo et al., 2014: Kudo, K., Oi, T., Uno, Y.	Dehydration responsive element binding factors (DREBs) play important roles in plant responses to abiotic stress. In this study, a DREB2-type gene, LsDREB2A, was isolated from lettuce (Lactuca sativa L.) and characterized. LsDREB2A encoded a protein of 322 amino acid residues with the conserved apetala 2 domain and was classified into the A2 subgroup of DREBs. LsDREB2A has no sequence rich in pro…	Accepted
ALL ( dreb2 AND "drought stress" ) AND ( LIMIT-TO ( DOCTYPE , "ar" ) ) AND ( LIMIT-TO ( LANGUAGE , "English" ) ) AND ( EXCLUDE ( SUBJAREA , "MEDI" ) OR EXCLUDE ( SUBJAREA , "NEUR" ) OR EXCLUDE ( SUBJAREA , "PHAR" ) OR EXCLUDE ( SUBJAREA , "VETE" ) OR EXCLUDE ( SUBJAREA , "PHYS" ) OR EXCLUDE ( SUBJAREA , "ECON" ) OR EXCLUDE ( SUBJAREA , "NURS" ) ) AND ( LIMIT-TO ( PUBSTAGE , "final" ) ) AND ( LIMI…	Scopus	Induced drought tolerance through wild and mutant bacterial strain Pseudomonas simiae in mung bean (Vigna radiata L.)	Kumari et al., 2016: Kumari, S., Vaishnav, A., Jain, S., Varma, A., Choudhary, D.K.	The present study focused on the overproducing mutant of a plant growth promoting rhizobacterium (PGPR) Pseudomonas simiae strain AU (MTCC-12057) for significant drought tolerance in mung bean plants. Five mutants namely AU-M1, AU-M2, AU-M3, AU-M4 and AU-M5 were made after treatment of wild type strain with N-methyl-N-nitro-N-nitrosoguanidine. Mutant strain AU-M4 was recorded for enhanced ACC dea…	Rejected	Biotic stress
ALL ( dreb2 AND "drought stress" ) AND ( LIMIT-TO ( DOCTYPE , "ar" ) ) AND ( LIMIT-TO ( LANGUAGE , "English" ) ) AND ( EXCLUDE ( SUBJAREA , "MEDI" ) OR EXCLUDE ( SUBJAREA , "NEUR" ) OR EXCLUDE ( SUBJAREA , "PHAR" ) OR EXCLUDE ( SUBJAREA , "VETE" ) OR EXCLUDE ( SUBJAREA , "PHYS" ) OR EXCLUDE ( SUBJAREA , "ECON" ) OR EXCLUDE ( SUBJAREA , "NURS" ) ) AND ( LIMIT-TO ( PUBSTAGE , "final" ) ) AND ( LIMI…	Scopus	Reference gene selection in the desert plant Eremosparton songoricum	Li et al., 2012: Li, X.-S., Yang, H.-L., Zhang, D.-Y., Zhang, Y.-M., Wood, A.J.	Eremosparton songoricum (Litv.) Vass. (E. songoricum) is a rare and extremely drought-tolerant desert plant that holds promise as a model organism for the identification of genes associated with water deficit stress. Here, we cloned and evaluated the expression of eight candidate reference genes using quantitative real-time reverse transcriptase polymerase chain reactions. The expression of these…	Rejected	Eremosparton songoricum
ALL ( dreb2 AND "drought stress" ) AND ( LIMIT-TO ( DOCTYPE , "ar" ) ) AND ( LIMIT-TO ( LANGUAGE , "English" ) ) AND ( EXCLUDE ( SUBJAREA , "MEDI" ) OR EXCLUDE ( SUBJAREA , "NEUR" ) OR EXCLUDE ( SUBJAREA , "PHAR" ) OR EXCLUDE ( SUBJAREA , "VETE" ) OR EXCLUDE ( SUBJAREA , "PHYS" ) OR EXCLUDE ( SUBJAREA , "ECON" ) OR EXCLUDE ( SUBJAREA , "NURS" ) ) AND ( LIMIT-TO ( PUBSTAGE , "final" ) ) AND ( LIMI…	Scopus	EsDREB2B, a novel truncated DREB2-type transcription factor in the desert legume Eremosparton songoricum, enhances tolerance to multiple abiotic stresses in yeast and transgenic tobacco	Li et al., 2014: Li, X., Zhang, D., Li, H., Wang, Y., Zhang, Y., Wood, A.J.	Dehydration-Responsive Element-Binding Protein2 (DREB2) is a transcriptional factor which regulates the expression of several stress-inducible genes. DREB2-type proteins are particularly important in plant responses to drought, salt and heat. DREB2 genes have been identified and characterized in a variety of plants, and DREB2 genes are promising candidate genes for the improvement of stress toler…	Rejected
ALL ( dreb2 AND "drought stress" ) AND ( LIMIT-TO ( DOCTYPE , "ar" ) ) AND ( LIMIT-TO ( LANGUAGE , "English" ) ) AND ( EXCLUDE ( SUBJAREA , "MEDI" ) OR EXCLUDE ( SUBJAREA , "NEUR" ) OR EXCLUDE ( SUBJAREA , "PHAR" ) OR EXCLUDE ( SUBJAREA , "VETE" ) OR EXCLUDE ( SUBJAREA , "PHYS" ) OR EXCLUDE ( SUBJAREA , "ECON" ) OR EXCLUDE ( SUBJAREA , "NURS" ) ) AND ( LIMIT-TO ( PUBSTAGE , "final" ) ) AND ( LIMI…	Scopus	TaUBA, a UBA domain-containing protein in wheat (Triticum aestivum L.), is a negative regulator of salt and drought stress response in transgenic Arabidopsis	Li et al., 2015: Li, X., Zhang, S.-S., Ma, J.-X., Guo, G.-Y., Zhang, X.-Y., Liu, X., Bi, C.-L.	TaUBA functions as a negative regulator of salt and drought stress response in transgenic Arabidopsis, either the UBA domain or the zinc finger domain is crucial for TaUBA’s function. TaUBA (DQ211935), which is a UBA domain-containing protein in wheat, was cloned and functionally characterized. Southern blot suggested that TaUBA is a low copy gene in common wheat. qRT-PCR assay showed that the ex…	Rejected
ALL ( dreb2 AND "drought stress" ) AND ( LIMIT-TO ( DOCTYPE , "ar" ) ) AND ( LIMIT-TO ( LANGUAGE , "English" ) ) AND ( EXCLUDE ( SUBJAREA , "MEDI" ) OR EXCLUDE ( SUBJAREA , "NEUR" ) OR EXCLUDE ( SUBJAREA , "PHAR" ) OR EXCLUDE ( SUBJAREA , "VETE" ) OR EXCLUDE ( SUBJAREA , "PHYS" ) OR EXCLUDE ( SUBJAREA , "ECON" ) OR EXCLUDE ( SUBJAREA , "NURS" ) ) AND ( LIMIT-TO ( PUBSTAGE , "final" ) ) AND ( LIMI…	Scopus	A R2R3-MYB transcription factor gene in common wheat (namely TaMYBsm1) involved in enhancement of drought tolerance in transgenic Arabidopsis	Li et al., 2016: Li, M.-J., Qiao, Y., Li, Y.-Q., Shi, Z.-L., Zhang, N., Bi, C.-L., Guo, J.-K.	We isolated the TaMYBsm1 genes, encoding R2R3-type MYB proteins in common wheat, aimed to uncover the possible molecular mechanisms related to drought response. The TaMYBsm1 genes, TaMYBsm1-A, TaMYBsm1-B and TaMYBsm1-D, were isolated and analyzed from the common wheat cultivar Shimai 15. Their expression patterns under PEG 6000 and mannitol were monitored by semi-quantitative RT-PCR and β-glucuro…	Rejected
ALL ( dreb2 AND "drought stress" ) AND ( LIMIT-TO ( DOCTYPE , "ar" ) ) AND ( LIMIT-TO ( LANGUAGE , "English" ) ) AND ( EXCLUDE ( SUBJAREA , "MEDI" ) OR EXCLUDE ( SUBJAREA , "NEUR" ) OR EXCLUDE ( SUBJAREA , "PHAR" ) OR EXCLUDE ( SUBJAREA , "VETE" ) OR EXCLUDE ( SUBJAREA , "PHYS" ) OR EXCLUDE ( SUBJAREA , "ECON" ) OR EXCLUDE ( SUBJAREA , "NURS" ) ) AND ( LIMIT-TO ( PUBSTAGE , "final" ) ) AND ( LIMI…	Scopus	MYB-CC transcription factor, TaMYBsm3, cloned from wheat is involved in drought tolerance	Li et al., 2019: Li, Y., Zhang, S., Zhang, N., Zhang, W., Li, M., Liu, B., Shi, Z.	MYB-CC transcription factors (TFs) genes have been demonstrated to be involved in the response to inorganic phosphate (Pi) starvation and regulate some Pi-starvation-inducible genes. However, their role in drought stress has not been investigated in bread wheat. In this study, the TaMYBsm3 genes, including TaMYBsm3-A, TaMYBsm3-B, and TaMYBsm3-D, encoding MYB-CC TF proteins in bread wheat, were is…	Rejected
ALL ( dreb2 AND "drought stress" ) AND ( LIMIT-TO ( DOCTYPE , "ar" ) ) AND ( LIMIT-TO ( LANGUAGE , "English" ) ) AND ( EXCLUDE ( SUBJAREA , "MEDI" ) OR EXCLUDE ( SUBJAREA , "NEUR" ) OR EXCLUDE ( SUBJAREA , "PHAR" ) OR EXCLUDE ( SUBJAREA , "VETE" ) OR EXCLUDE ( SUBJAREA , "PHYS" ) OR EXCLUDE ( SUBJAREA , "ECON" ) OR EXCLUDE ( SUBJAREA , "NURS" ) ) AND ( LIMIT-TO ( PUBSTAGE , "final" ) ) AND ( LIMI…	Scopus	Heterologous expression of Arabidopsis thaliana rty gene in strawberry (Fragaria × ananassa Duch.) improves drought tolerance	Li et al., 2021: Li, M., Yang, Y., Raza, A., Yin, S., Wang, H., Zhang, Y., Dong, J., Wang, G., Zhong, C., Zhang, H., Liu, J., Jin, W.	Strawberry (Fragaria × ananassa Duch.) is an important fruit crop worldwide. It was particularly sensitive to drought stress because of their fibrous and shallow root systems. Mutant rty of Arabidopsis thaliana ROOTY (RTY) results in increased endogenous auxin levels, more roots, and shoot growth. It is still unclear whether the rty gene improves stress tolerance in strawberry. Results: rty gene …	Accepted
ALL ( dreb2 AND "drought stress" ) AND ( LIMIT-TO ( DOCTYPE , "ar" ) ) AND ( LIMIT-TO ( LANGUAGE , "English" ) ) AND ( EXCLUDE ( SUBJAREA , "MEDI" ) OR EXCLUDE ( SUBJAREA , "NEUR" ) OR EXCLUDE ( SUBJAREA , "PHAR" ) OR EXCLUDE ( SUBJAREA , "VETE" ) OR EXCLUDE ( SUBJAREA , "PHYS" ) OR EXCLUDE ( SUBJAREA , "ECON" ) OR EXCLUDE ( SUBJAREA , "NURS" ) ) AND ( LIMIT-TO ( PUBSTAGE , "final" ) ) AND ( LIMI…	Scopus	Whole-genome characterization of Rosa chinensis AP2/ERF transcription factors and analysis of negative regulator RcDREB2B in Arabidopsis	Li et al., 2021: Li, W., Geng, Z., Zhang, C., Wang, K., Jiang, X.	Rose (Rosa chinensis) is a traditional famous flower with valuable ornamental characteristics. However, drought stress restricts its growth and development, leading to an abnormal phenotype. One of the main transcription factor (TF) protein groups in the plant kingdom are the APETALA2/ethylene-responsive factor (AP2/ERF) proteins and are potentially involved in the growth and stress responses of …	Rejected	no drought stress
ALL ( dreb2 AND "drought stress" ) AND ( LIMIT-TO ( DOCTYPE , "ar" ) ) AND ( LIMIT-TO ( LANGUAGE , "English" ) ) AND ( EXCLUDE ( SUBJAREA , "MEDI" ) OR EXCLUDE ( SUBJAREA , "NEUR" ) OR EXCLUDE ( SUBJAREA , "PHAR" ) OR EXCLUDE ( SUBJAREA , "VETE" ) OR EXCLUDE ( SUBJAREA , "PHYS" ) OR EXCLUDE ( SUBJAREA , "ECON" ) OR EXCLUDE ( SUBJAREA , "NURS" ) ) AND ( LIMIT-TO ( PUBSTAGE , "final" ) ) AND ( LIMI…	Scopus	AtMYB32 regulates the ABA response by targeting ABI3, ABI4 and ABI5 and the drought response by targeting CBF4 in Arabidopsis	Li et al., 2021: Li, X., Zhong, M., Qu, L., Yang, J., Liu, X., Zhao, Q., Liu, X., Zhao, X.	The Arabidopsis thaliana R2R3-MYB transcription factor AtMYB32 and its homologs AtMYB4 and AtMYB7 play crucial roles in the regulation of phenylpropanoid metabolism. In addition, AtMYB4 and AtMYB7 are involved in the response to abiotic stress. However, the function of AtMYB32 remains unclear. In this study, we found that AtMYB32 is induced by abscisic acid (ABA) and repressed by drought stress. …	Rejected
ALL ( dreb2 AND "drought stress" ) AND ( LIMIT-TO ( DOCTYPE , "ar" ) ) AND ( LIMIT-TO ( LANGUAGE , "English" ) ) AND ( EXCLUDE ( SUBJAREA , "MEDI" ) OR EXCLUDE ( SUBJAREA , "NEUR" ) OR EXCLUDE ( SUBJAREA , "PHAR" ) OR EXCLUDE ( SUBJAREA , "VETE" ) OR EXCLUDE ( SUBJAREA , "PHYS" ) OR EXCLUDE ( SUBJAREA , "ECON" ) OR EXCLUDE ( SUBJAREA , "NURS" ) ) AND ( LIMIT-TO ( PUBSTAGE , "final" ) ) AND ( LIMI…	Scopus	Identification and functional roles of CaDIN1 in abscisic acid signaling and drought sensitivity	Lim et al., 2014: Lim, S., Baek, W., Lee, S.C.	Plants frequently face challenges caused by various abiotic stresses, including drought, and have evolved defense mechanisms to counteract the deleterious effects of these stresses. The phytohormone abscisic acid (ABA) is involved in signal transduction pathways that mediate defense responses of plants to abiotic stress. Here, we report a new function of the CaDIN1 protein in defense responses to…	Rejected	No complete protocol of extraction
ALL ( dreb2 AND "drought stress" ) AND ( LIMIT-TO ( DOCTYPE , "ar" ) ) AND ( LIMIT-TO ( LANGUAGE , "English" ) ) AND ( EXCLUDE ( SUBJAREA , "MEDI" ) OR EXCLUDE ( SUBJAREA , "NEUR" ) OR EXCLUDE ( SUBJAREA , "PHAR" ) OR EXCLUDE ( SUBJAREA , "VETE" ) OR EXCLUDE ( SUBJAREA , "PHYS" ) OR EXCLUDE ( SUBJAREA , "ECON" ) OR EXCLUDE ( SUBJAREA , "NURS" ) ) AND ( LIMIT-TO ( PUBSTAGE , "final" ) ) AND ( LIMI…	Scopus	Molecular cloning, expression profiling and trans-activation property studies of a DREB2-like gene from chrysanthemum (Dendranthema vestitum)	Liu et al., 2008: Liu, L., Zhu, K., Yang, Y., Wu, J., Chen, F., Yu, D.	Dehydration responsive element binding (DREB) proteins are important transcription factors in plant stress response and signal transduction. In this study, a DREB homolog gene, DvDREB2A, was isolated from chrysanthemum (Dendranthema vestitum) by reverse transcriptase-polymerase chain reaction (RT-PCR) and rapid amplification of cDNA ends (RACE) methods. It contained an open reading frame (ORF) of…	Rejected
ALL ( dreb2 AND "drought stress" ) AND ( LIMIT-TO ( DOCTYPE , "ar" ) ) AND ( LIMIT-TO ( LANGUAGE , "English" ) ) AND ( EXCLUDE ( SUBJAREA , "MEDI" ) OR EXCLUDE ( SUBJAREA , "NEUR" ) OR EXCLUDE ( SUBJAREA , "PHAR" ) OR EXCLUDE ( SUBJAREA , "VETE" ) OR EXCLUDE ( SUBJAREA , "PHYS" ) OR EXCLUDE ( SUBJAREA , "ECON" ) OR EXCLUDE ( SUBJAREA , "NURS" ) ) AND ( LIMIT-TO ( PUBSTAGE , "final" ) ) AND ( LIMI…	Scopus	Improved short-term drought response of transgenic rice over-expressing maize C4 phosphoenolpyruvate carboxylase via calcium signal cascade	Liu et al., 2017: Liu, X., Li, X., Dai, C., Zhou, J., Yan, T., Zhang, J.	To understand the link between long-term drought tolerance and short-term drought responses in plants, transgenic rice (Oryza sativa L.) plants over-expressing the maize C4-pepc gene encoding phosphoenolpyruvate carboxylase (PC) and wild-type (WT) rice plants were subjected to PEG 6000 treatments to simulate drought stress. Compared with WT, PC had the higher survival rate and net photosynthetic …	Accepted
ALL ( dreb2 AND "drought stress" ) AND ( LIMIT-TO ( DOCTYPE , "ar" ) ) AND ( LIMIT-TO ( LANGUAGE , "English" ) ) AND ( EXCLUDE ( SUBJAREA , "MEDI" ) OR EXCLUDE ( SUBJAREA , "NEUR" ) OR EXCLUDE ( SUBJAREA , "PHAR" ) OR EXCLUDE ( SUBJAREA , "VETE" ) OR EXCLUDE ( SUBJAREA , "PHYS" ) OR EXCLUDE ( SUBJAREA , "ECON" ) OR EXCLUDE ( SUBJAREA , "NURS" ) ) AND ( LIMIT-TO ( PUBSTAGE , "final" ) ) AND ( LIMI…	Scopus	Ectopic expression of ATCIPK23 enhances drought tolerance via accumulating less H2O2 in transgenic tobacco plants	Lu et al., 2018: Lu, L., Yang, L., Li, K., Lu, Y., Li, L.	Drought is a major threat to agricultural crop growth and productivity. However, the molecular mechanism behind such effects remains largely unknown. Plant CBL (Calcineurin B-Like)-interacting protein kinases (CIPKs) are believed to play an important role in plant drought tolerance and signalling transduction. Here, we report the influence of a member of the CIPK family, AtCIPK23, in drought stre…	Rejected	DREBs
ALL ( dreb2 AND "drought stress" ) AND ( LIMIT-TO ( DOCTYPE , "ar" ) ) AND ( LIMIT-TO ( LANGUAGE , "English" ) ) AND ( EXCLUDE ( SUBJAREA , "MEDI" ) OR EXCLUDE ( SUBJAREA , "NEUR" ) OR EXCLUDE ( SUBJAREA , "PHAR" ) OR EXCLUDE ( SUBJAREA , "VETE" ) OR EXCLUDE ( SUBJAREA , "PHYS" ) OR EXCLUDE ( SUBJAREA , "ECON" ) OR EXCLUDE ( SUBJAREA , "NURS" ) ) AND ( LIMIT-TO ( PUBSTAGE , "final" ) ) AND ( LIMI…	Scopus	Plant growth-promoting rhizobacteria Shewanella putrefaciens and Cronobacter dublinensis enhance drought tolerance of pearl millet by modulating hormones and stress-responsive genes	Manjunatha et al., 2022: Manjunatha, B.S., Nivetha, N., Krishna, G.K., Elangovan, A., Pushkar, S., Chandrashekar, N., Aggarwal, C., Asha, A.D., Chinnusamy, V., Raipuria, R.K., Watts, A., Bandeppa, S., Dukare, A.S., Paul, S.	Drought is a major abiotic stress that affects crop productivity. Endophytic bacteria have been found to alleviate the adverse effects of drought on plants. In the present study, we evaluated the effects of two endophytic bacteria Shewanella putrefaciens strain MCL-1 and Cronobacter dublinensis strain MKS-1 on pearl millet (Pennisetum glaucum (L.) R. Br.) under drought stress conditions. Pearl mi…	Accepted	Supplementary material
ALL ( dreb2 AND "drought stress" ) AND ( LIMIT-TO ( DOCTYPE , "ar" ) ) AND ( LIMIT-TO ( LANGUAGE , "English" ) ) AND ( EXCLUDE ( SUBJAREA , "MEDI" ) OR EXCLUDE ( SUBJAREA , "NEUR" ) OR EXCLUDE ( SUBJAREA , "PHAR" ) OR EXCLUDE ( SUBJAREA , "VETE" ) OR EXCLUDE ( SUBJAREA , "PHYS" ) OR EXCLUDE ( SUBJAREA , "ECON" ) OR EXCLUDE ( SUBJAREA , "NURS" ) ) AND ( LIMIT-TO ( PUBSTAGE , "final" ) ) AND ( LIMI…	Scopus	Comprehensive analysis of rice DREB2-type genes that encode transcription factors involved in the expression of abiotic stress-responsive genes	Matsukura et al., 2010: Matsukura, S., Mizoi, J., Yoshida, T., Todaka, D., Ito, Y., Maruyama, K., Shinozaki, K., Yamaguchi-Shinozaki, K.	DREB2s (dehydration-responsive element-binding protein 2s) are transcription factors that interact with a cis-acting DRE (dehydration- responsive element)/CRT (C-repeat) sequence and activate the expression of downstream genes involved in water- and heat-shock stress responses and tolerance in Arabidopsis thaliana. In this study, we performed a comprehensive analysis of all five DREB2-type genes …	Accepted
ALL ( dreb2 AND "drought stress" ) AND ( LIMIT-TO ( DOCTYPE , "ar" ) ) AND ( LIMIT-TO ( LANGUAGE , "English" ) ) AND ( EXCLUDE ( SUBJAREA , "MEDI" ) OR EXCLUDE ( SUBJAREA , "NEUR" ) OR EXCLUDE ( SUBJAREA , "PHAR" ) OR EXCLUDE ( SUBJAREA , "VETE" ) OR EXCLUDE ( SUBJAREA , "PHYS" ) OR EXCLUDE ( SUBJAREA , "ECON" ) OR EXCLUDE ( SUBJAREA , "NURS" ) ) AND ( LIMIT-TO ( PUBSTAGE , "final" ) ) AND ( LIMI…	Scopus	The anthocyanin-rich tomato genotype LA-1996 displays superior efficiency of mechanisms of tolerance to salinity and drought	Napar et al., 2022: Wado Photo Faqir Napar, Abdul Rasheed Kaleri, Awais Ahmed, Farhan Nabi, Sumbal Sajid, Tatjana Cosi, Yinan Yao, Jikai Liu, Martin Raspor, Yongfeng Gao	Tomato cultivation is affected by high soil salinity and drought stress, which cause major yield losses worldwide. In this work, we compare the efficiency of mechanisms of tolerance to salinity, and osmotic stress applied as mannitol or drought, in three tomato genotypes: LA-2838 (Ailsa Craig), LA-2662 (Saladette), and LA-1996 (Anthocyanin fruit – Aft), a genotype known for high anthocyanin conte…	Rejected
ALL ( dreb2 AND "drought stress" ) AND ( LIMIT-TO ( DOCTYPE , "ar" ) ) AND ( LIMIT-TO ( LANGUAGE , "English" ) ) AND ( EXCLUDE ( SUBJAREA , "MEDI" ) OR EXCLUDE ( SUBJAREA , "NEUR" ) OR EXCLUDE ( SUBJAREA , "PHAR" ) OR EXCLUDE ( SUBJAREA , "VETE" ) OR EXCLUDE ( SUBJAREA , "PHYS" ) OR EXCLUDE ( SUBJAREA , "ECON" ) OR EXCLUDE ( SUBJAREA , "NURS" ) ) AND ( LIMIT-TO ( PUBSTAGE , "final" ) ) AND ( LIMI…	Scopus	ANAC019 is required for recovery of reproductive development under drought stress in Arabidopsis	Sukiran et al., 2019: Sukiran, N.L., Ma, J.C., Ma, H., Su, Z.	Morphological and transcriptomic evidences provide us strong support for the function of ANAC019 in reproductive development under drought stress. Abstract: Plants are sensitive to drought conditions, particularly at the reproductive stage. Several studies have reported drought effects on crop reproductive development, but the molecular mechanism underlying drought response during reproduction is…	Rejected	Unreadable graph
ALL ( dreb2 AND "drought stress" ) AND ( LIMIT-TO ( DOCTYPE , "ar" ) ) AND ( LIMIT-TO ( LANGUAGE , "English" ) ) AND ( EXCLUDE ( SUBJAREA , "MEDI" ) OR EXCLUDE ( SUBJAREA , "NEUR" ) OR EXCLUDE ( SUBJAREA , "PHAR" ) OR EXCLUDE ( SUBJAREA , "VETE" ) OR EXCLUDE ( SUBJAREA , "PHYS" ) OR EXCLUDE ( SUBJAREA , "ECON" ) OR EXCLUDE ( SUBJAREA , "NURS" ) ) AND ( LIMIT-TO ( PUBSTAGE , "final" ) ) AND ( LIMI…	Scopus	Comprehensive phylogenomic analysis of ERF genes in sorghum provides clues to the evolution of gene functions and redundancy among gene family members	Mathur et al., 2020: Mathur, S., Priyadarshini, S.S., Singh, V., Vashisht, I., Jung, K.-H., Sharma, R., Sharma, M.K.	APETALA2/Ethylene-Responsive transcription factors (AP2/ERF), with their multifunctional roles in plant development, hormone signaling and stress tolerance, are important candidates for engineering crop plants. Here, we report identification and analysis of gene structure, phylogenetic distribution, expression, chromosomal localization and cis-acting promoter analysis of AP2/ERF genes in the C4 c…	Rejected	DREBs, no DREB2
ALL ( dreb2 AND "drought stress" ) AND ( LIMIT-TO ( DOCTYPE , "ar" ) ) AND ( LIMIT-TO ( LANGUAGE , "English" ) ) AND ( EXCLUDE ( SUBJAREA , "MEDI" ) OR EXCLUDE ( SUBJAREA , "NEUR" ) OR EXCLUDE ( SUBJAREA , "PHAR" ) OR EXCLUDE ( SUBJAREA , "VETE" ) OR EXCLUDE ( SUBJAREA , "PHYS" ) OR EXCLUDE ( SUBJAREA , "ECON" ) OR EXCLUDE ( SUBJAREA , "NURS" ) ) AND ( LIMIT-TO ( PUBSTAGE , "final" ) ) AND ( LIMI…	Scopus	Modulation of auxin content in Arabidopsis confers improved drought stress resistance	Shi et al., 2014: Shi, H., Chen, L., Ye, T., Liu, X., Ding, K., Chan, Z.	Auxin is a well-known plant phytohormone that is involved in multiple plant growth processes and stress responses. In this study, auxin response was significantly modulated under drought stress condition. The iaaM-OX transgenic lines with higher endogenous indole-3-acetic acid (IAA) level and IAA pre-treated wild type (WT) plants exhibited enhanced drought stress resistance, while the yuc1yuc2yuc…	Rejected	no drought stress
ALL ( dreb2 AND "drought stress" ) AND ( LIMIT-TO ( DOCTYPE , "ar" ) ) AND ( LIMIT-TO ( LANGUAGE , "English" ) ) AND ( EXCLUDE ( SUBJAREA , "MEDI" ) OR EXCLUDE ( SUBJAREA , "NEUR" ) OR EXCLUDE ( SUBJAREA , "PHAR" ) OR EXCLUDE ( SUBJAREA , "VETE" ) OR EXCLUDE ( SUBJAREA , "PHYS" ) OR EXCLUDE ( SUBJAREA , "ECON" ) OR EXCLUDE ( SUBJAREA , "NURS" ) ) AND ( LIMIT-TO ( PUBSTAGE , "final" ) ) AND ( LIMI…	Scopus	Isolation, promoter analysis and expression profile of Dreb2 in response to drought stress in wheat ancestors	Tavakol et al., 2014: Tavakol, E., Sardaro, M.L.S., Shariati J, V., Rossini, L., Porceddu, E.	Drought is one of the most important abiotic stresses, constraining crop production seriously. The dehydration responsive element binding proteins (DREBs) are important plant-specific transcription factors that respond to various abiotic stresses and consequently induce abiotic stress-related genes that impart stress endurance in plants. Wild species are naturally exposed to various abiotic stres…	Rejected	silencing gene
ALL ( dreb2 AND "drought stress" ) AND ( LIMIT-TO ( DOCTYPE , "ar" ) ) AND ( LIMIT-TO ( LANGUAGE , "English" ) ) AND ( EXCLUDE ( SUBJAREA , "MEDI" ) OR EXCLUDE ( SUBJAREA , "NEUR" ) OR EXCLUDE ( SUBJAREA , "PHAR" ) OR EXCLUDE ( SUBJAREA , "VETE" ) OR EXCLUDE ( SUBJAREA , "PHYS" ) OR EXCLUDE ( SUBJAREA , "ECON" ) OR EXCLUDE ( SUBJAREA , "NURS" ) ) AND ( LIMIT-TO ( PUBSTAGE , "final" ) ) AND ( LIMI…	Scopus	The DREB A-5 Transcription Factor ScDREB5 From Syntrichia caninervis Enhanced Salt Tolerance by Regulating Jasmonic Acid Biosynthesis in Transgenic Arabidopsis	Liu et al., 2022: Liu, J., Yang, R., Liang, Y., Wang, Y., Li, X.	Salinity is a major limiting factor in crop productivity. Dehydration-responsive element-binding protein (DREB) transcription factors have been widely identified in a variety of plants and play important roles in plant stress responses. Studies on DREBs have primarily focused on the A-1 and A-2 DREB groups, while few have focused on the A-5 group. In this study, we concentrated on ScDREB5, an A-5…	Rejected	no DREB2 expression
ALL ( dreb2 AND "drought stress" ) AND ( LIMIT-TO ( DOCTYPE , "ar" ) ) AND ( LIMIT-TO ( LANGUAGE , "English" ) ) AND ( EXCLUDE ( SUBJAREA , "MEDI" ) OR EXCLUDE ( SUBJAREA , "NEUR" ) OR EXCLUDE ( SUBJAREA , "PHAR" ) OR EXCLUDE ( SUBJAREA , "VETE" ) OR EXCLUDE ( SUBJAREA , "PHYS" ) OR EXCLUDE ( SUBJAREA , "ECON" ) OR EXCLUDE ( SUBJAREA , "NURS" ) ) AND ( LIMIT-TO ( PUBSTAGE , "final" ) ) AND ( LIMI…	Scopus	Changes in antioxidant enzyme activities and gene expression profiles under drought stress in tolerant, intermediate, and susceptible wheat genotypes	Nasirzadeh et al., 2021: Nasirzadeh, L., Sorkhilaleloo, B., Majidi Hervan, E., Fatehi, F.	Drought is a common abiotic stress that influences crop production to a large extent all over the world. Wheat crop experiences drought at main stages during its life cycle, which induces oxidative stress in the plants. The antioxidant mechanisms of the plant have a significant role in providing tolerance against the water stress. The objective of this work was to investigate the antioxidant acti…	Rejected	no DREB2
ALL ( dreb2 AND "drought stress" ) AND ( LIMIT-TO ( DOCTYPE , "ar" ) ) AND ( LIMIT-TO ( LANGUAGE , "English" ) ) AND ( EXCLUDE ( SUBJAREA , "MEDI" ) OR EXCLUDE ( SUBJAREA , "NEUR" ) OR EXCLUDE ( SUBJAREA , "PHAR" ) OR EXCLUDE ( SUBJAREA , "VETE" ) OR EXCLUDE ( SUBJAREA , "PHYS" ) OR EXCLUDE ( SUBJAREA , "ECON" ) OR EXCLUDE ( SUBJAREA , "NURS" ) ) AND ( LIMIT-TO ( PUBSTAGE , "final" ) ) AND ( LIMI…	Scopus	Phenotypical, physiological and molecular assessment of drought tolerance of five Egyptian teosinte genotypes	Bondok et al., 2022: Bondok, A.E.T., Mousa, W.M.E., Rady, A.M.S., Saad-Allah, K.M.	Prolonged drought presents a serious challenge to the agricultural sector. The main concern of this work was to assess the phenotypical, physiological, and molecular responses of five teosinte (Zea mexicana Schrad L.) genotypes (Ba, Gm1, Gm2, Gm3 and Gm4). In a two-season (2020 and 2021) field experiment, fifteen-day-old teosinte plants were subjected to well-watered (15-day watering frequency) a…	Rejected	no DREB2 expression
ALL ( dreb2 AND "drought stress" ) AND ( LIMIT-TO ( DOCTYPE , "ar" ) ) AND ( LIMIT-TO ( LANGUAGE , "English" ) ) AND ( EXCLUDE ( SUBJAREA , "MEDI" ) OR EXCLUDE ( SUBJAREA , "NEUR" ) OR EXCLUDE ( SUBJAREA , "PHAR" ) OR EXCLUDE ( SUBJAREA , "VETE" ) OR EXCLUDE ( SUBJAREA , "PHYS" ) OR EXCLUDE ( SUBJAREA , "ECON" ) OR EXCLUDE ( SUBJAREA , "NURS" ) ) AND ( LIMIT-TO ( PUBSTAGE , "final" ) ) AND ( LIMI…	Scopus	Meta-analysis of the effect of overexpression of CBF/DREB family genes on drought stress response	Dong et al., 2017: Dong, C., Ma, Y., Wisniewski, M., Cheng, Z.-M.	Transcription factors C-repeat/dehydration-responsive element binding proteins (CBF/DREB) play an important role in plant response to abiotic stresses. Over-expression of various CBF/DREB genes in diverse plants have been reported, but inconsistency of gene donor, recipient genus, parameters used in evaluating the transgenic plants have made it difficult to elucidate the complex physiological mec…	Rejected	meta-analysis
ALL ( dreb2 AND "drought stress" ) AND ( LIMIT-TO ( DOCTYPE , "ar" ) ) AND ( LIMIT-TO ( LANGUAGE , "English" ) ) AND ( EXCLUDE ( SUBJAREA , "MEDI" ) OR EXCLUDE ( SUBJAREA , "NEUR" ) OR EXCLUDE ( SUBJAREA , "PHAR" ) OR EXCLUDE ( SUBJAREA , "VETE" ) OR EXCLUDE ( SUBJAREA , "PHYS" ) OR EXCLUDE ( SUBJAREA , "ECON" ) OR EXCLUDE ( SUBJAREA , "NURS" ) ) AND ( LIMIT-TO ( PUBSTAGE , "final" ) ) AND ( LIMI…	Scopus	Arabidopsis PED2 positively modulates plant drought stress resistance	Shi et al., 2015: Shi, H., Ye, T., Yang, F., Chan, Z.	Abscisic acid (ABA) is an important phytohormone that functions in seed germination, plant development, and multiple stress responses. Arabidopsis Peroxisome defective 2 (AtPED2) (also known as AtPEXOXIN14, AtPEX14), is involved in the intracellular transport of thiolase from the cytosol to glyoxysomes, and perosisomal matrix protein import in plants. In this study, we assigned a new role for AtP…	Rejected	no DREB2
ALL ( dreb2 AND "drought stress" ) AND ( LIMIT-TO ( DOCTYPE , "ar" ) ) AND ( LIMIT-TO ( LANGUAGE , "English" ) ) AND ( EXCLUDE ( SUBJAREA , "MEDI" ) OR EXCLUDE ( SUBJAREA , "NEUR" ) OR EXCLUDE ( SUBJAREA , "PHAR" ) OR EXCLUDE ( SUBJAREA , "VETE" ) OR EXCLUDE ( SUBJAREA , "PHYS" ) OR EXCLUDE ( SUBJAREA , "ECON" ) OR EXCLUDE ( SUBJAREA , "NURS" ) ) AND ( LIMIT-TO ( PUBSTAGE , "final" ) ) AND ( LIMI…	Scopus	Response of different genotypes of faba bean plant to drought stress	Siddiqui et al., 2015: Siddiqui, M.H., Al-Khaishany, M.Y., Al-Qutami, M.A., Al-Whaibi, M.H., Grover, A., Ali, H.M., Al-Wahibi, M.S., Bukhari, N.A.	Drought stress is one of the major abiotic stresses that are a threat to crop production worldwide. Drought stress impairs the plants growth and yield. Therefore, the aim of the present experiment was to select the tolerant genotype/s on the basis of moprpho-physiological and biochemical characteristics of 10 Vicia faba genotypes (Zafar 1, Zafar 2, Shebam, Makamora, Espan, Giza Blanka, Giza 3, C4…	Rejected	no DREB2
ALL ( dreb2 AND "drought stress" ) AND ( LIMIT-TO ( DOCTYPE , "ar" ) ) AND ( LIMIT-TO ( LANGUAGE , "English" ) ) AND ( EXCLUDE ( SUBJAREA , "MEDI" ) OR EXCLUDE ( SUBJAREA , "NEUR" ) OR EXCLUDE ( SUBJAREA , "PHAR" ) OR EXCLUDE ( SUBJAREA , "VETE" ) OR EXCLUDE ( SUBJAREA , "PHYS" ) OR EXCLUDE ( SUBJAREA , "ECON" ) OR EXCLUDE ( SUBJAREA , "NURS" ) ) AND ( LIMIT-TO ( PUBSTAGE , "final" ) ) AND ( LIMI…	Scopus	Comparative proteomic investigation of drought responses in foxtail millet	Pan et al., 2018: Pan, J., Li, Z., Wang, Q., Garrell, A.K., Liu, M., Guan, Y., Zhou, W., Liu, W.	Foxtail millet (Setaria italica L. P. Beauv) has been considered as a tractable model crop in recent years due to its short growing cycle, lower amount of repetitive DNA, inbreeding nature, small diploid genome, and outstanding abiotic stress-tolerance characteristics. With modern agriculture facing various adversities, it's urgent to dissect the mechanisms of how foxtail millet responds and adap…	Rejected	no DREB2
ALL ( dreb2 AND "drought stress" ) AND ( LIMIT-TO ( DOCTYPE , "ar" ) ) AND ( LIMIT-TO ( LANGUAGE , "English" ) ) AND ( EXCLUDE ( SUBJAREA , "MEDI" ) OR EXCLUDE ( SUBJAREA , "NEUR" ) OR EXCLUDE ( SUBJAREA , "PHAR" ) OR EXCLUDE ( SUBJAREA , "VETE" ) OR EXCLUDE ( SUBJAREA , "PHYS" ) OR EXCLUDE ( SUBJAREA , "ECON" ) OR EXCLUDE ( SUBJAREA , "NURS" ) ) AND ( LIMIT-TO ( PUBSTAGE , "final" ) ) AND ( LIMI…	Scopus	Transcriptome analysis of drought-resistant and drought-sensitive sorghum (Sorghum bicolor) genotypes in response to peg-induced drought stress	Abdel-Ghany et al., 2020: Abdel-Ghany, S.E., Ullah, F., Ben-Hur, A., Reddy, A.S.N.	Drought is a major limiting factor of crop yields. In response to drought, plants reprogram their gene expression, which ultimately regulates a multitude of biochemical and physiological processes. The timing of this reprogramming and the nature of the drought-regulated genes in different genotypes are thought to confer differential tolerance to drought stress. Sorghum is a highly drought-toleran…	Rejected	no fold change of DREB2
ALL ( dreb2 AND "drought stress" ) AND ( LIMIT-TO ( DOCTYPE , "ar" ) ) AND ( LIMIT-TO ( LANGUAGE , "English" ) ) AND ( EXCLUDE ( SUBJAREA , "MEDI" ) OR EXCLUDE ( SUBJAREA , "NEUR" ) OR EXCLUDE ( SUBJAREA , "PHAR" ) OR EXCLUDE ( SUBJAREA , "VETE" ) OR EXCLUDE ( SUBJAREA , "PHYS" ) OR EXCLUDE ( SUBJAREA , "ECON" ) OR EXCLUDE ( SUBJAREA , "NURS" ) ) AND ( LIMIT-TO ( PUBSTAGE , "final" ) ) AND ( LIMI…	Scopus	Identification and characterization of drought stress responsive genes in faba bean (Vicia faba L.) by suppression subtractive hybridization	Abid et al., 2015: Abid, G., Muhovski, Y., Mingeot, D., Watillon, B., Toussaint, A., Mergeai, G., M’hamdi, M., Sassi, K., Jebara, M.	Faba bean (Vicia faba L.) ranks fourth in food legume crop production in the world. However, drought is a potential major constraint to faba bean production and improved faba bean cultivars and development of drought-resistant varieties play a key role in enhancing faba bean crop production. In this study, suppression subtractive hybridization (SSH) technique was used to study differential expres…	Rejected	no fold change of DREB2
ALL ( dreb2 AND "drought stress" ) AND ( LIMIT-TO ( DOCTYPE , "ar" ) ) AND ( LIMIT-TO ( LANGUAGE , "English" ) ) AND ( EXCLUDE ( SUBJAREA , "MEDI" ) OR EXCLUDE ( SUBJAREA , "NEUR" ) OR EXCLUDE ( SUBJAREA , "PHAR" ) OR EXCLUDE ( SUBJAREA , "VETE" ) OR EXCLUDE ( SUBJAREA , "PHYS" ) OR EXCLUDE ( SUBJAREA , "ECON" ) OR EXCLUDE ( SUBJAREA , "NURS" ) ) AND ( LIMIT-TO ( PUBSTAGE , "final" ) ) AND ( LIMI…	Scopus	Phylogenetic, molecular, and functional characterization of PpyCBF proteins in Asian pears (Pyrus pyrifolia)	Ahmad et al., 2019: Ahmad, M., Li, J., Yang, Q., Jamil, W., Teng, Y., Bai, S.	C‐repeat binding factor/dehydration‐responsive element (CBF/DRE) transcription factors (TFs) participate in a variety of adaptive mechanisms, and are involved in molecular signaling and abiotic stress tolerance in plants. In pear (Pyrus pyrifolia) and other rosaceous crops, the independent evolution of CBF subfamily members requires investigation to understand the possible divergent functions of …	Rejected	no DREB2
ALL ( dreb2 AND "drought stress" ) AND ( LIMIT-TO ( DOCTYPE , "ar" ) ) AND ( LIMIT-TO ( LANGUAGE , "English" ) ) AND ( EXCLUDE ( SUBJAREA , "MEDI" ) OR EXCLUDE ( SUBJAREA , "NEUR" ) OR EXCLUDE ( SUBJAREA , "PHAR" ) OR EXCLUDE ( SUBJAREA , "VETE" ) OR EXCLUDE ( SUBJAREA , "PHYS" ) OR EXCLUDE ( SUBJAREA , "ECON" ) OR EXCLUDE ( SUBJAREA , "NURS" ) ) AND ( LIMIT-TO ( PUBSTAGE , "final" ) ) AND ( LIMI…	Scopus	Stress-Inducible Overexpression of SlDDF2 Gene Improves Tolerance against Multiple Abiotic Stresses in Tomato Plant	Al-Deeb et al., 2022: Al-Deeb, T., Gamar, M.A., El-Assi, N., Al-Debei, H., Al-Sayaydeh, R., Al-Abdallat, A.M.	Dehydration-responsive element-binding protein 1 (DREB1)/C-repeat binding factor (CBF) family plays a key role in plant tolerance against different abiotic stresses. In this study, an orthologous gene of the DWARF AND DELAYED FLOWERING (DDF) members in Arabidopsis, SlDDF2, was identified in tomato plants. The SlDDF2 gene expression was analyzed, and a clear induction in response to ABA treatment,…	Rejected	no fold change of DREB2
ALL ( dreb2 AND "drought stress" ) AND ( LIMIT-TO ( DOCTYPE , "ar" ) ) AND ( LIMIT-TO ( LANGUAGE , "English" ) ) AND ( EXCLUDE ( SUBJAREA , "MEDI" ) OR EXCLUDE ( SUBJAREA , "NEUR" ) OR EXCLUDE ( SUBJAREA , "PHAR" ) OR EXCLUDE ( SUBJAREA , "VETE" ) OR EXCLUDE ( SUBJAREA , "PHYS" ) OR EXCLUDE ( SUBJAREA , "ECON" ) OR EXCLUDE ( SUBJAREA , "NURS" ) ) AND ( LIMIT-TO ( PUBSTAGE , "final" ) ) AND ( LIMI…	Scopus	The HaDREB2 transcription factor enhances basal thermotolerance and longevity of seeds through functional interaction with HaHSFA9	Almoguera et al., 2009: Almoguera, C., Prieto-Dapena, P., Díaz-Martín, J., Espinosa, J.M., Carranco, R., Jordano, J.	Transcription factor HaDREB2 was identified in sunflower (Helianthus annuus L.) as a drought-responsive element-binding factor 2 (DREB2) with unique properties. HaDREB2 and the sunflower Heat Shock Factor A9 (HaHSFA9) co-activated the Hahsp17.6G1 promoter in sunflower embryos. Both factors could be involved in transcriptional co-activation of additional small heat stress protein (sHSP) promoters,…	Rejected	no fold change of DREB2
ALL ( dreb2 AND "drought stress" ) AND ( LIMIT-TO ( DOCTYPE , "ar" ) ) AND ( LIMIT-TO ( LANGUAGE , "English" ) ) AND ( EXCLUDE ( SUBJAREA , "MEDI" ) OR EXCLUDE ( SUBJAREA , "NEUR" ) OR EXCLUDE ( SUBJAREA , "PHAR" ) OR EXCLUDE ( SUBJAREA , "VETE" ) OR EXCLUDE ( SUBJAREA , "PHYS" ) OR EXCLUDE ( SUBJAREA , "ECON" ) OR EXCLUDE ( SUBJAREA , "NURS" ) ) AND ( LIMIT-TO ( PUBSTAGE , "final" ) ) AND ( LIMI…	Scopus	Nucleotide Diversity of the Coding and Promoter Regions of DREB1D, a Candidate Gene for Drought Tolerance in Coffea Species	Alves et al., 2018: Alves, G.S.C., Torres, L.F., de Aquino, S.O., Reichel, T., Freire, L.P., Vieira, N.G., Vinecky, F., This, D., Pot, D., Etienne, H., Paiva, L.V., Marraccini, P., Andrade, A.C.	Climate change is posing a major challenge to coffee production worldwide leading to a need for the development of coffee cultivars with increased drought tolerance. In several plant species, the use of DREB genes in crop improvement has achieved promising results to desiccation tolerance engineering. Recent studies reported CcDREB1D specific patterns of expression in Coffea canephora and functio…	Rejected	expression of DREB1 and not DREB2
ALL ( dreb2 AND "drought stress" ) AND ( LIMIT-TO ( DOCTYPE , "ar" ) ) AND ( LIMIT-TO ( LANGUAGE , "English" ) ) AND ( EXCLUDE ( SUBJAREA , "MEDI" ) OR EXCLUDE ( SUBJAREA , "NEUR" ) OR EXCLUDE ( SUBJAREA , "PHAR" ) OR EXCLUDE ( SUBJAREA , "VETE" ) OR EXCLUDE ( SUBJAREA , "PHYS" ) OR EXCLUDE ( SUBJAREA , "ECON" ) OR EXCLUDE ( SUBJAREA , "NURS" ) ) AND ( LIMIT-TO ( PUBSTAGE , "final" ) ) AND ( LIMI…	Scopus	The ERF transcription factor MdERF38 promotes drought stress-induced anthocyanin biosynthesis	An et al., 2020: An, J.-P., Zhang, X.-W., Bi, S.-Q., You, C.-X., Wang, X.-F., Hao, Y.-J.	Drought stress induces anthocyanin biosynthesis in many plant species, but the underlying molecular mechanism remains unclear. Ethylene response factors (ERFs) play key roles in plant growth and various stress responses, including affecting anthocyanin biosynthesis. Here, we characterized an ERF protein, MdERF38, which is involved in drought stress-induced anthocyanin biosynthesis. Biochemical an…	Rejected	no expression of DREB2
ALL ( dreb2 AND "drought stress" ) AND ( LIMIT-TO ( DOCTYPE , "ar" ) ) AND ( LIMIT-TO ( LANGUAGE , "English" ) ) AND ( EXCLUDE ( SUBJAREA , "MEDI" ) OR EXCLUDE ( SUBJAREA , "NEUR" ) OR EXCLUDE ( SUBJAREA , "PHAR" ) OR EXCLUDE ( SUBJAREA , "VETE" ) OR EXCLUDE ( SUBJAREA , "PHYS" ) OR EXCLUDE ( SUBJAREA , "ECON" ) OR EXCLUDE ( SUBJAREA , "NURS" ) ) AND ( LIMIT-TO ( PUBSTAGE , "final" ) ) AND ( LIMI…	Scopus	The NPK1 gene increases sugarcane productivity under water deficit and conventional crop management conditions	Aquino et al., 2022: Aquino, G.S.D., Fermino, E.C.	The global demand for sugarcane products, such as ethanol, is growing and requires a rapid increase in sugarcane productivity to meet the market needs. On the other hand, water deficit has been successively limiting production in the majority of Brazil and world producing areas. We aimed to assess the industrial quality components and productivity of transgenic sugarcane containing gene NPK1 (Nic…	Rejected	no expression of DREB2
ALL ( dreb2 AND "drought stress" ) AND ( LIMIT-TO ( DOCTYPE , "ar" ) ) AND ( LIMIT-TO ( LANGUAGE , "English" ) ) AND ( EXCLUDE ( SUBJAREA , "MEDI" ) OR EXCLUDE ( SUBJAREA , "NEUR" ) OR EXCLUDE ( SUBJAREA , "PHAR" ) OR EXCLUDE ( SUBJAREA , "VETE" ) OR EXCLUDE ( SUBJAREA , "PHYS" ) OR EXCLUDE ( SUBJAREA , "ECON" ) OR EXCLUDE ( SUBJAREA , "NURS" ) ) AND ( LIMIT-TO ( PUBSTAGE , "final" ) ) AND ( LIMI…	Scopus	Early molecular responses of tomato to combined moderate water stress and tomato red spider mite tetranychus evansi attack	Arbona et al., 2020: Arbona, V., Ximénez-Embún, M.G., Echavarri-Muñoz, A., Martin-Sánchez, M., Gómez-Cadenas, A., Ortego, F., González-Guzmán, M.	Interaction between plants and their environment is changing as a consequence of the climate change and global warming, increasing the performance and dispersal of some pest species which become invasive species. Tetranychus evansi also known as the tomato red spider mite, is an invasive species which has been reported to increase its performance when feeding in the tomato cultivar Moneymaker (MM…	Rejected	no numeber of individuals
ALL ( dreb2 AND "drought stress" ) AND ( LIMIT-TO ( DOCTYPE , "ar" ) ) AND ( LIMIT-TO ( LANGUAGE , "English" ) ) AND ( EXCLUDE ( SUBJAREA , "MEDI" ) OR EXCLUDE ( SUBJAREA , "NEUR" ) OR EXCLUDE ( SUBJAREA , "PHAR" ) OR EXCLUDE ( SUBJAREA , "VETE" ) OR EXCLUDE ( SUBJAREA , "PHYS" ) OR EXCLUDE ( SUBJAREA , "ECON" ) OR EXCLUDE ( SUBJAREA , "NURS" ) ) AND ( LIMIT-TO ( PUBSTAGE , "final" ) ) AND ( LIMI…	Scopus	Osmoprotective functions conferred to soybean plants via inoculation with Sphingomonas sp. LK11 and exogenous trehalose	Asaf et al., 2017: Asaf, S., Khan, A.L., Khan, M.A., Imran, Q.M., Yun, B.-W., Lee, I.-J.	Osmotic stress induced by drought can hinder the growth and yield of crop plants. To understand the eco-physiological role of osmoprotectants, the combined utilization of endophytes and osmolytes (trehalose) can be an ideal strategy used to overcome the adverse effects of drought. Hence, in the present study, we aimed to investigate the role of Sphingomonas sp. LK11, which produces phytohormones …	Rejected	no fold change of DREB2
ALL ( dreb2 AND "drought stress" ) AND ( LIMIT-TO ( DOCTYPE , "ar" ) ) AND ( LIMIT-TO ( LANGUAGE , "English" ) ) AND ( EXCLUDE ( SUBJAREA , "MEDI" ) OR EXCLUDE ( SUBJAREA , "NEUR" ) OR EXCLUDE ( SUBJAREA , "PHAR" ) OR EXCLUDE ( SUBJAREA , "VETE" ) OR EXCLUDE ( SUBJAREA , "PHYS" ) OR EXCLUDE ( SUBJAREA , "ECON" ) OR EXCLUDE ( SUBJAREA , "NURS" ) ) AND ( LIMIT-TO ( PUBSTAGE , "final" ) ) AND ( LIMI…	Scopus	Overexpression of EaDREB2 and pyramiding of EaDREB2 with the pea DNA helicase gene (PDH45) enhance drought and salinity tolerance in sugarcane (Saccharum spp. hybrid)	Augustine et al., 2015: Augustine, S.M., Ashwin Narayan, J., Syamaladevi, D.P., Appunu, C., Chakravarthi, M., Ravichandran, V., Tuteja, N., Subramonian, N.	Drought is one of the most challenging agricultural issues limiting sustainable sugarcane production and can potentially cause up to 50 % yield loss. DREB proteins play a vital regulatory role in abiotic stress tolerance in plants. We previously reported that expression of EaDREB2 is enhanced by drought stress in Erianthusarundinaceus. In this study, we have isolated the DREB2 gene from E. arundi…	Rejected	no drought stress
ALL ( dreb2 AND "drought stress" ) AND ( LIMIT-TO ( DOCTYPE , "ar" ) ) AND ( LIMIT-TO ( LANGUAGE , "English" ) ) AND ( EXCLUDE ( SUBJAREA , "MEDI" ) OR EXCLUDE ( SUBJAREA , "NEUR" ) OR EXCLUDE ( SUBJAREA , "PHAR" ) OR EXCLUDE ( SUBJAREA , "VETE" ) OR EXCLUDE ( SUBJAREA , "PHYS" ) OR EXCLUDE ( SUBJAREA , "ECON" ) OR EXCLUDE ( SUBJAREA , "NURS" ) ) AND ( LIMIT-TO ( PUBSTAGE , "final" ) ) AND ( LIMI…	Scopus	Antioxidant, physiological and biochemical responses of drought susceptible and drought tolerant mustard (Brassica juncea L) genotypes to rhizobacterial inoculation under water deficit stress	Bandeppa et al., 2019: Bandeppa, S., Paul, S., Thakur, J.K., Chandrashekar, N., Umesh, D.K., Aggarwal, C., Asha, A.D.	Response of drought susceptible (DS) genotype Pusa Karishma LES-39 and drought tolerant (DT) mustard genotype NPJ-124, to rhizobacterial inoculation under water deficit stress, was compared in the present study to determine the influence of inoculants on biochemical and physiological attributes of these two different genotypes. Inoculation was observed to improve root and shoot dry weight in both…	Rejected	With PGPR
ALL ( dreb2 AND "drought stress" ) AND ( LIMIT-TO ( DOCTYPE , "ar" ) ) AND ( LIMIT-TO ( LANGUAGE , "English" ) ) AND ( EXCLUDE ( SUBJAREA , "MEDI" ) OR EXCLUDE ( SUBJAREA , "NEUR" ) OR EXCLUDE ( SUBJAREA , "PHAR" ) OR EXCLUDE ( SUBJAREA , "VETE" ) OR EXCLUDE ( SUBJAREA , "PHYS" ) OR EXCLUDE ( SUBJAREA , "ECON" ) OR EXCLUDE ( SUBJAREA , "NURS" ) ) AND ( LIMIT-TO ( PUBSTAGE , "final" ) ) AND ( LIMI…	Scopus	Arabidopsis CBL-interacting protein kinase (CIPK6) is involved in plant response to salt/osmotic stress and ABA	Chen et al., 2013: Chen, L., Wang, Q.-Q., Zhou, L., Ren, F., Li, D.-D., Li, X.-B.	The CBL-CIPK signaling pathway represents a central and critical signaling system involved in plant response to abiotic stress and hormone signaling. In this study, we focused on AtCIPK6 gene, which have been shown to be required for development and salt tolerance in Arabidopsis, but the transcriptional regulatory mechanism of AtCIPK6 gene and whether it plays a role in ABA signaling is still unk…	Rejected	no fold change of DREB2
ALL ( dreb2 AND "drought stress" ) AND ( LIMIT-TO ( DOCTYPE , "ar" ) ) AND ( LIMIT-TO ( LANGUAGE , "English" ) ) AND ( EXCLUDE ( SUBJAREA , "MEDI" ) OR EXCLUDE ( SUBJAREA , "NEUR" ) OR EXCLUDE ( SUBJAREA , "PHAR" ) OR EXCLUDE ( SUBJAREA , "VETE" ) OR EXCLUDE ( SUBJAREA , "PHYS" ) OR EXCLUDE ( SUBJAREA , "ECON" ) OR EXCLUDE ( SUBJAREA , "NURS" ) ) AND ( LIMIT-TO ( PUBSTAGE , "final" ) ) AND ( LIMI…	Scopus	Comprehensive Analysis for GRF Transcription Factors in Sacred Lotus (Nelumbo nucifera)	Chen et al., 2022: Chen, G.-Z., Huang, J., Zhou, X.-Q., Hao, Y., Chen, J.-L., Zhou, Y.-Z., Ahmad, S., Lan, S., Liu, Z.-J., Peng, D.-H.	Sacred lotus (Nelumbo nucifera) is an aquatic perennial plant with essential food, ornamental, and pharmacological value. Growth‐regulating factor (GRF) is a transcription factor (TF) family that plays an important role in regulating the growth and development of plants. In this study, a comprehensive analysis of the GRF family in N. nucifera was performed, and its role in N. nucifera development…	Rejected	no fold change of DREB2
ALL ( dreb2 AND "drought stress" ) AND ( LIMIT-TO ( DOCTYPE , "ar" ) ) AND ( LIMIT-TO ( LANGUAGE , "English" ) ) AND ( EXCLUDE ( SUBJAREA , "MEDI" ) OR EXCLUDE ( SUBJAREA , "NEUR" ) OR EXCLUDE ( SUBJAREA , "PHAR" ) OR EXCLUDE ( SUBJAREA , "VETE" ) OR EXCLUDE ( SUBJAREA , "PHYS" ) OR EXCLUDE ( SUBJAREA , "ECON" ) OR EXCLUDE ( SUBJAREA , "NURS" ) ) AND ( LIMIT-TO ( PUBSTAGE , "final" ) ) AND ( LIMI…	Scopus	Overexpression of the Salix matsudana SmAP2-17 gene improves Arabidopsis salinity tolerance by enhancing the expression of SOS3 and ABI5	Chen et al., 2022: Chen, Y., Dai, Y., Li, Y., Yang, J., Jiang, Y., Liu, G., Yu, C., Zhong, F., Lian, B., Zhang, J.	Background: Salix matsudana (Koidz.) is a widely planted ornamental allotetraploid tree species. Genetic engineering can be used to enhance the tolerance of this species to soil salinization, endowing varieties with the ability to grow along coastlines, thereby mitigating afforestation and protecting the environment. The AP2/ERF family of transcription factors (TFs) plays multidimensional roles i…	Rejected	no expression of DREB2
ALL ( dreb2 AND "drought stress" ) AND ( LIMIT-TO ( DOCTYPE , "ar" ) ) AND ( LIMIT-TO ( LANGUAGE , "English" ) ) AND ( EXCLUDE ( SUBJAREA , "MEDI" ) OR EXCLUDE ( SUBJAREA , "NEUR" ) OR EXCLUDE ( SUBJAREA , "PHAR" ) OR EXCLUDE ( SUBJAREA , "VETE" ) OR EXCLUDE ( SUBJAREA , "PHYS" ) OR EXCLUDE ( SUBJAREA , "ECON" ) OR EXCLUDE ( SUBJAREA , "NURS" ) ) AND ( LIMIT-TO ( PUBSTAGE , "final" ) ) AND ( LIMI…	Scopus	Plant miRNAs: Biogenesis and its functional validation to combat drought stress with special focus on maize	Das et al., 2021: Das, R., Mondal, S.K.	High variations in climatic conditions and other environmental stresses, including drought, have adverse effects on crop production worldwide. Drought tolerance, the complex trait involves numerous gene regulatory networks where microRNAs (miRNAs) are known to play an important role as post-transcriptional modulators by regulating their target genes expression to increase drought tolerance within…	Rejected	miRNA
ALL ( dreb2 AND "drought stress" ) AND ( LIMIT-TO ( DOCTYPE , "ar" ) ) AND ( LIMIT-TO ( LANGUAGE , "English" ) ) AND ( EXCLUDE ( SUBJAREA , "MEDI" ) OR EXCLUDE ( SUBJAREA , "NEUR" ) OR EXCLUDE ( SUBJAREA , "PHAR" ) OR EXCLUDE ( SUBJAREA , "VETE" ) OR EXCLUDE ( SUBJAREA , "PHYS" ) OR EXCLUDE ( SUBJAREA , "ECON" ) OR EXCLUDE ( SUBJAREA , "NURS" ) ) AND ( LIMIT-TO ( PUBSTAGE , "final" ) ) AND ( LIMI…	Scopus	The role of DREB2 gene in drought tolerance of common wheat (Triticum Aestivum L.) associated with azospirillum brasilense	Dehghani et al., 2019: Dehghani, I., Mostajeran, A., Esmaeili, A., Ghannadian, M.	Dehydration causes loss of wheat (Triticum aestivum L.) yield. Inoculation of wheat with Azospirillum brasilense improves its tolerance to drought. Although up-regulation of DREB2 gene has increased drought tolerance of wheat, less information exists about DREB2 expression under inoculation with A. brasilense. In this study, the physiological responses of different pairs of six wheat cultivars wi…	Rejected	no control
ALL ( dreb2 AND "drought stress" ) AND ( LIMIT-TO ( DOCTYPE , "ar" ) ) AND ( LIMIT-TO ( LANGUAGE , "English" ) ) AND ( EXCLUDE ( SUBJAREA , "MEDI" ) OR EXCLUDE ( SUBJAREA , "NEUR" ) OR EXCLUDE ( SUBJAREA , "PHAR" ) OR EXCLUDE ( SUBJAREA , "VETE" ) OR EXCLUDE ( SUBJAREA , "PHYS" ) OR EXCLUDE ( SUBJAREA , "ECON" ) OR EXCLUDE ( SUBJAREA , "NURS" ) ) AND ( LIMIT-TO ( PUBSTAGE , "final" ) ) AND ( LIMI…	Scopus	TaERF73 is associated with root depth, thousand-grain weight and plant height in wheat over a range of environmental conditions	Du et al., 2022: Du, Y., Li, C., Mao, X., Wang, J., Li, L., Yang, J., Zhuang, M., Sun, D., Jing, R.	AP2/ERF is a plant-specific transcription factor superfamily regulating plant growth, development and responses to multiple stresses. However, the roles of ERF genes in the growth and development of wheat (Triticum aestivum L.) remain elusive. In this study, a novel ERF gene TaERF73 was cloned from wheat. qRT-PCR analysis showed that TaERF73 is predominantly expressed in roots. It responds to tre…	Rejected	no expression of DREB2
ALL ( dreb2 AND "drought stress" ) AND ( LIMIT-TO ( DOCTYPE , "ar" ) ) AND ( LIMIT-TO ( LANGUAGE , "English" ) ) AND ( EXCLUDE ( SUBJAREA , "MEDI" ) OR EXCLUDE ( SUBJAREA , "NEUR" ) OR EXCLUDE ( SUBJAREA , "PHAR" ) OR EXCLUDE ( SUBJAREA , "VETE" ) OR EXCLUDE ( SUBJAREA , "PHYS" ) OR EXCLUDE ( SUBJAREA , "ECON" ) OR EXCLUDE ( SUBJAREA , "NURS" ) ) AND ( LIMIT-TO ( PUBSTAGE , "final" ) ) AND ( LIMI…	Scopus	AREB1 is a transcription activator of novel ABRE-dependent ABA signaling that enhances drought stress tolerance in Arabidopsis	Fujita et al., 2005: Fujita, Y., Fujita, M., Satoh, R., Maruyama, K., Parvez, M.M., Seki, M., Hiratsu, K., Ohme-Takagi, M., Shinozaki, K., Yamaguchi-Shinozaki, K.	ABSCISIC ACID-RESPONSIVE ELEMENT BINDING PROTEIN1 (AREB1) (i.e., ABF2) is a basic domain/leucine zipper transcription factor that binds to the abscisic acid (ABA)-responsive element (ABRE) motif in the promoter region of ABA-inducible genes. Here, we show that expression of the intact AREB1 gene on its own is insufficient to lead to expression of downstream genes under normal growth conditions. T…	Rejected	no DREB2
ALL ( dreb2 AND "drought stress" ) AND ( LIMIT-TO ( DOCTYPE , "ar" ) ) AND ( LIMIT-TO ( LANGUAGE , "English" ) ) AND ( EXCLUDE ( SUBJAREA , "MEDI" ) OR EXCLUDE ( SUBJAREA , "NEUR" ) OR EXCLUDE ( SUBJAREA , "PHAR" ) OR EXCLUDE ( SUBJAREA , "VETE" ) OR EXCLUDE ( SUBJAREA , "PHYS" ) OR EXCLUDE ( SUBJAREA , "ECON" ) OR EXCLUDE ( SUBJAREA , "NURS" ) ) AND ( LIMIT-TO ( PUBSTAGE , "final" ) ) AND ( LIMI…	Scopus	Physiological and transcriptome analyses of the effects of exogenous dopamine on drought tolerance in apple	Gao et al., 2020: Tengteng Gao, Zhijun Zhang, Xiaomin Liu, Qian Wu, Qi Chen, Qianwei Liu, Steve van Nocker, Fengwang Ma, Chao Li	Water shortage is one of the main limiting factors in apple (Malus domestica Borkh.) production. Although dopamine is produced in plants and has been linked with response to abiotic stress, the underlying mechanism remains unknown. In this study, physiological analyses revealed that pretreatment with 100 μM dopamine alleviated drought stress in apple seedlings. Dopamine inhibited the degradation …	Rejected	no DREB2
ALL ( dreb2 AND "drought stress" ) AND ( LIMIT-TO ( DOCTYPE , "ar" ) ) AND ( LIMIT-TO ( LANGUAGE , "English" ) ) AND ( EXCLUDE ( SUBJAREA , "MEDI" ) OR EXCLUDE ( SUBJAREA , "NEUR" ) OR EXCLUDE ( SUBJAREA , "PHAR" ) OR EXCLUDE ( SUBJAREA , "VETE" ) OR EXCLUDE ( SUBJAREA , "PHYS" ) OR EXCLUDE ( SUBJAREA , "ECON" ) OR EXCLUDE ( SUBJAREA , "NURS" ) ) AND ( LIMIT-TO ( PUBSTAGE , "final" ) ) AND ( LIMI…	Scopus	A novel cold-regulated protein isolated from Saussurea involucrata confers cold and drought tolerance in transgenic tobacco (Nicotiana tabacum)	Guo et al., 2019: Guo, X., Zhang, L., Dong, G., Xu, Z., Li, G., Liu, N., Wang, A., Zhu, J.	Adverse environmental conditions, such as cold and drought, can inhibit plant growth, development, and productivity. The isolation and characterization of stress response genes from stress-tolerant plants can provide a better understanding of the underlying adaptive mechanisms. In this study, a novel cold-regulated gene, SikCOR413PM1, was isolated from Saussurea involucrata Kar. et Kir., which is…	Rejected	no DREB2
ALL ( dreb2 AND "drought stress" ) AND ( LIMIT-TO ( DOCTYPE , "ar" ) ) AND ( LIMIT-TO ( LANGUAGE , "English" ) ) AND ( EXCLUDE ( SUBJAREA , "MEDI" ) OR EXCLUDE ( SUBJAREA , "NEUR" ) OR EXCLUDE ( SUBJAREA , "PHAR" ) OR EXCLUDE ( SUBJAREA , "VETE" ) OR EXCLUDE ( SUBJAREA , "PHYS" ) OR EXCLUDE ( SUBJAREA , "ECON" ) OR EXCLUDE ( SUBJAREA , "NURS" ) ) AND ( LIMIT-TO ( PUBSTAGE , "final" ) ) AND ( LIMI…	Scopus	Overexpression of AtDREB1D transcription factor improves drought tolerance in soybean	Guttikonda et al., 2014: Guttikonda, S.K., Valliyodan, B., Neelakandan, A.K., Tran, L.-S.P., Kumar, R., Quach, T.N., Voothuluru, P., Gutierrez-Gonzalez, J.J., Aldrich, D.L., Pallardy, S.G., Sharp, R.E., Ho, T.-H.D., Nguyen, H.T.	Drought is one of the major abiotic stresses that affect productivity in soybean (Glycine max L.) Several genes induced by drought stress include functional genes and regulatory transcription factors. The Arabidopsis thaliana DREB1D transcription factor driven by the constitutive and ABA-inducible promoters was introduced into soybean through Agrobacterium tumefaciens-mediated gene transfer. Seve…	Rejected	DREB1
ALL ( dreb2 AND "drought stress" ) AND ( LIMIT-TO ( DOCTYPE , "ar" ) ) AND ( LIMIT-TO ( LANGUAGE , "English" ) ) AND ( EXCLUDE ( SUBJAREA , "MEDI" ) OR EXCLUDE ( SUBJAREA , "NEUR" ) OR EXCLUDE ( SUBJAREA , "PHAR" ) OR EXCLUDE ( SUBJAREA , "VETE" ) OR EXCLUDE ( SUBJAREA , "PHYS" ) OR EXCLUDE ( SUBJAREA , "ECON" ) OR EXCLUDE ( SUBJAREA , "NURS" ) ) AND ( LIMIT-TO ( PUBSTAGE , "final" ) ) AND ( LIMI…	Scopus	The MdAP2-34 modulates flavonoid accumulation in apple (Malus domestica Borkh.) by regulating MdF3′H	Han et al., 2022: Han, D., Huang, B., Li, Y., Dang, Q., Fan, L., Nie, J., Wang, Y., Yuan, Y., Jia, D.	Flavonoids are one of the main pigments in horticultural fruit. The AP2/ERF transcription factors play various roles in higher plants, and thus, MdAP2–34 has been reported to regulate carotenoid accumulation in apple. However, it is unclear whether light interferes with the flavonoid accumulation in apple fruit flesh. Here, we found that apple of ‘Benin Shogun’ fruit flesh had higher levels of fl…	Rejected	no DREB2
ALL ( dreb2 AND "drought stress" ) AND ( LIMIT-TO ( DOCTYPE , "ar" ) ) AND ( LIMIT-TO ( LANGUAGE , "English" ) ) AND ( EXCLUDE ( SUBJAREA , "MEDI" ) OR EXCLUDE ( SUBJAREA , "NEUR" ) OR EXCLUDE ( SUBJAREA , "PHAR" ) OR EXCLUDE ( SUBJAREA , "VETE" ) OR EXCLUDE ( SUBJAREA , "PHYS" ) OR EXCLUDE ( SUBJAREA , "ECON" ) OR EXCLUDE ( SUBJAREA , "NURS" ) ) AND ( LIMIT-TO ( PUBSTAGE , "final" ) ) AND ( LIMI…	Scopus	Tomato SlDREB1 gene conferred the transcriptional activation of drought-induced gene and an enhanced tolerance of the transgenic Arabidopsis to drought stress	Jiang et al., 2017: Jiang, L., Wang, Y., Zhang, S., He, R., Li, W., Han, J., Cheng, X.	DREB transcription factors usually play important regulatory roles in the responses of plants to abiotic stress. In this study, a novel SlDREB1 transcription factor from tomato was isolated by yeast-one-hybrid system. Bioinformatics analysis showed that the SlDREB1 is a single copy gene with typical AP2 conserved domain, and located on the #6 chromosome of the tomato genome. The SlDREB1 protein w…	Rejected	no expression of DREB2
ALL ( dreb2 AND "drought stress" ) AND ( LIMIT-TO ( DOCTYPE , "ar" ) ) AND ( LIMIT-TO ( LANGUAGE , "English" ) ) AND ( EXCLUDE ( SUBJAREA , "MEDI" ) OR EXCLUDE ( SUBJAREA , "NEUR" ) OR EXCLUDE ( SUBJAREA , "PHAR" ) OR EXCLUDE ( SUBJAREA , "VETE" ) OR EXCLUDE ( SUBJAREA , "PHYS" ) OR EXCLUDE ( SUBJAREA , "ECON" ) OR EXCLUDE ( SUBJAREA , "NURS" ) ) AND ( LIMIT-TO ( PUBSTAGE , "final" ) ) AND ( LIMI…	Scopus	Transcription factors and plants response to drought stress: Current understanding and future directions	Joshi et al., 2016: Joshi, R., Wani, S.H., Singh, B., Bohra, A., Dar, Z.A., Lone, A.A., Pareek, A., Singla-Pareek, S.L.	Increasing vulnerability of plants to a variety of stresses such as drought, salt and extreme temperatures poses a global threat to sustained growth and productivity of major crops. Of these stresses, drought represents a considerable threat to plant growth and development. In view of this, developing staple food cultivars with improved drought tolerance emerges as the most sustainable solution t…	Rejected	review
ALL ( dreb2 AND "drought stress" ) AND ( LIMIT-TO ( DOCTYPE , "ar" ) ) AND ( LIMIT-TO ( LANGUAGE , "English" ) ) AND ( EXCLUDE ( SUBJAREA , "MEDI" ) OR EXCLUDE ( SUBJAREA , "NEUR" ) OR EXCLUDE ( SUBJAREA , "PHAR" ) OR EXCLUDE ( SUBJAREA , "VETE" ) OR EXCLUDE ( SUBJAREA , "PHYS" ) OR EXCLUDE ( SUBJAREA , "ECON" ) OR EXCLUDE ( SUBJAREA , "NURS" ) ) AND ( LIMIT-TO ( PUBSTAGE , "final" ) ) AND ( LIMI…	Scopus	Rice transcription factor AP37 involved in grain yield increase under drought stress	Kim et al., 2009: Kim, Y.S., Kim, J.-K.	Drought is a serious threat to the sustainability of rice yields in rainfed agriculture. In particular, exposure to drought conditions during the stage of panicle development of a rice plant results in a delayed flowering time, reduced number of spikelets and poor grain filling. In our recent report, we functionally characterized the rice AP37 gene for drought tolerance during the vegetative and …	Rejected
ALL ( dreb2 AND "drought stress" ) AND ( LIMIT-TO ( DOCTYPE , "ar" ) ) AND ( LIMIT-TO ( LANGUAGE , "English" ) ) AND ( EXCLUDE ( SUBJAREA , "MEDI" ) OR EXCLUDE ( SUBJAREA , "NEUR" ) OR EXCLUDE ( SUBJAREA , "PHAR" ) OR EXCLUDE ( SUBJAREA , "VETE" ) OR EXCLUDE ( SUBJAREA , "PHYS" ) OR EXCLUDE ( SUBJAREA , "ECON" ) OR EXCLUDE ( SUBJAREA , "NURS" ) ) AND ( LIMIT-TO ( PUBSTAGE , "final" ) ) AND ( LIMI…	Scopus	Arabidopsis YAK1 regulates abscisic acid response and drought resistance	Kim et al., 2016: Kim, D., Ntui, V.O., Xiong, L.	Abscisic acid (ABA) is an important phytohormone that controls several plant processes such as seed germination, seedling growth, and abiotic stress response. Here, we report that AtYak1 plays an important role in ABA signaling and postgermination growth in Arabidopsis. AtYak1 knockout mutant plants were hyposensitive to ABA inhibition of seed germination, cotyledon greening, seedling growth, and…	Rejected	no expression of DREB2
ALL ( dreb2 AND "drought stress" ) AND ( LIMIT-TO ( DOCTYPE , "ar" ) ) AND ( LIMIT-TO ( LANGUAGE , "English" ) ) AND ( EXCLUDE ( SUBJAREA , "MEDI" ) OR EXCLUDE ( SUBJAREA , "NEUR" ) OR EXCLUDE ( SUBJAREA , "PHAR" ) OR EXCLUDE ( SUBJAREA , "VETE" ) OR EXCLUDE ( SUBJAREA , "PHYS" ) OR EXCLUDE ( SUBJAREA , "ECON" ) OR EXCLUDE ( SUBJAREA , "NURS" ) ) AND ( LIMIT-TO ( PUBSTAGE , "final" ) ) AND ( LIMI…	Scopus	Multilevel regulation and signalling processes associated with adaptation to terminal drought in wild emmer wheat	Krugman et al., 2010: Krugman, T., Chagué, V., Peleg, Z., Balzergue, S., Just, J., Korol, A.B., Nevo, E., Saranga, Y., Chalhoub, B., Fahima, T.	Low water availability is the major environmental factor limiting crop productivity. Transcriptome analysis was used to study terminal drought response in wild emmer wheat, Triticum dicoccoides, genotypes contrasting in their productivity and yield stability under drought stress. A total of 5,892 differentially regulated transcripts were identified between drought and well-watered control and/or …	Rejected	no expression of DREB2
ALL ( dreb2 AND "drought stress" ) AND ( LIMIT-TO ( DOCTYPE , "ar" ) ) AND ( LIMIT-TO ( LANGUAGE , "English" ) ) AND ( EXCLUDE ( SUBJAREA , "MEDI" ) OR EXCLUDE ( SUBJAREA , "NEUR" ) OR EXCLUDE ( SUBJAREA , "PHAR" ) OR EXCLUDE ( SUBJAREA , "VETE" ) OR EXCLUDE ( SUBJAREA , "PHYS" ) OR EXCLUDE ( SUBJAREA , "ECON" ) OR EXCLUDE ( SUBJAREA , "NURS" ) ) AND ( LIMIT-TO ( PUBSTAGE , "final" ) ) AND ( LIMI…	Scopus	A gene-stacking approach to overcome the trade-off between drought stress tolerance and growth in Arabidopsis	Kudo et al., 2019: Kudo, M., Kidokoro, S., Yoshida, T., Mizoi, J., Kojima, M., Takebayashi, Y., Sakakibara, H., Fernie, A.R., Shinozaki, K., Yamaguchi-Shinozaki, K.	The molecular breeding of drought stress-tolerant crops is imperative for stable food and biomass production. However, a trade-off exists between plant growth and drought stress tolerance. Many drought stress-tolerant plants overexpressing stress-inducible genes, such as DEHYDRATION-RESPONSIVE ELEMENT-BINDING PROTEIN 1A (DREB1A), show severe growth retardation. Here, we demonstrate that the growt…	Rejected	no expression of DREB2
ALL ( dreb2 AND "drought stress" ) AND ( LIMIT-TO ( DOCTYPE , "ar" ) ) AND ( LIMIT-TO ( LANGUAGE , "English" ) ) AND ( EXCLUDE ( SUBJAREA , "MEDI" ) OR EXCLUDE ( SUBJAREA , "NEUR" ) OR EXCLUDE ( SUBJAREA , "PHAR" ) OR EXCLUDE ( SUBJAREA , "VETE" ) OR EXCLUDE ( SUBJAREA , "PHYS" ) OR EXCLUDE ( SUBJAREA , "ECON" ) OR EXCLUDE ( SUBJAREA , "NURS" ) ) AND ( LIMIT-TO ( PUBSTAGE , "final" ) ) AND ( LIMI…	Scopus	Functional and structural insights into novel DREB1A transcription factors in common wheat (Triticum aestivum L.): A molecular modeling approach	Kumar et al., 2016: Kumar, A., Kumar, S., Kumar, U., Suravajhala, P., Gajula, M.N.V.P.	Triticum aestivum L. known as common wheat is one of the most important cereal crops feeding a large and growing population. Various environmental stress factors including drought, high salinity and heat etc. adversely affect wheat production in a significant manner. Dehydration-responsive element-binding (DREB1A) factors, a class of transcription factors (TF) play an important role in combating …	Rejected	no expression of DREB2
ALL ( dreb2 AND "drought stress" ) AND ( LIMIT-TO ( DOCTYPE , "ar" ) ) AND ( LIMIT-TO ( LANGUAGE , "English" ) ) AND ( EXCLUDE ( SUBJAREA , "MEDI" ) OR EXCLUDE ( SUBJAREA , "NEUR" ) OR EXCLUDE ( SUBJAREA , "PHAR" ) OR EXCLUDE ( SUBJAREA , "VETE" ) OR EXCLUDE ( SUBJAREA , "PHYS" ) OR EXCLUDE ( SUBJAREA , "ECON" ) OR EXCLUDE ( SUBJAREA , "NURS" ) ) AND ( LIMIT-TO ( PUBSTAGE , "final" ) ) AND ( LIMI…	Scopus	Variation in dehydration tolerance, ABA sensitivity and related gene expression patterns in D-genome progenitor and synthetic hexaploid wheat lines	Kurahashi et al., 2009: Kurahashi, Y., Terashima, A., Takumi, S.	The wild wheat Aegilops tauschii Coss. has extensive natural variation available for breeding of common wheat. Drought stress tolerance is closely related to abscisic acid (ABA) sensitivity. In this study, 17 synthetic hexaploid wheat lines, produced by crossing the tetraploid wheat cultivar Langdon with 17 accessions of Ae. tauschii, were used for comparative analysis of natural variation in dro…	Rejected	no expression of DREB2
ALL ( dreb2 AND "drought stress" ) AND ( LIMIT-TO ( DOCTYPE , "ar" ) ) AND ( LIMIT-TO ( LANGUAGE , "English" ) ) AND ( EXCLUDE ( SUBJAREA , "MEDI" ) OR EXCLUDE ( SUBJAREA , "NEUR" ) OR EXCLUDE ( SUBJAREA , "PHAR" ) OR EXCLUDE ( SUBJAREA , "VETE" ) OR EXCLUDE ( SUBJAREA , "PHYS" ) OR EXCLUDE ( SUBJAREA , "ECON" ) OR EXCLUDE ( SUBJAREA , "NURS" ) ) AND ( LIMIT-TO ( PUBSTAGE , "final" ) ) AND ( LIMI…	Scopus	The NF-YA transcription factor OsNF-YA7 confers drought stress tolerance of rice in an abscisic acid independent manner	Lee et al., 2015: Lee, D.-K., Kim, H.I., Jang, G., Chung, P.J., Jeong, J.S., Kim, Y.S., Bang, S.W., Jung, H., Choi, Y.D., Kim, J.-K.	The mechanisms of plant response and adaptation to drought stress require the regulation of transcriptional networks via the induction of drought-responsive transcription factors. Nuclear Factor Y (NF-Y) transcription factors have aroused interest in roles of plant drought stress responses. However, the molecular mechanism of the NF-Y-induced drought tolerance is not well understood. Here, we fun…	Rejected	no fold change of DREB2
ALL ( dreb2 AND "drought stress" ) AND ( LIMIT-TO ( DOCTYPE , "ar" ) ) AND ( LIMIT-TO ( LANGUAGE , "English" ) ) AND ( EXCLUDE ( SUBJAREA , "MEDI" ) OR EXCLUDE ( SUBJAREA , "NEUR" ) OR EXCLUDE ( SUBJAREA , "PHAR" ) OR EXCLUDE ( SUBJAREA , "VETE" ) OR EXCLUDE ( SUBJAREA , "PHYS" ) OR EXCLUDE ( SUBJAREA , "ECON" ) OR EXCLUDE ( SUBJAREA , "NURS" ) ) AND ( LIMIT-TO ( PUBSTAGE , "final" ) ) AND ( LIMI…	Scopus	Synergistic activation of RD29A via integration of salinity stress and abscisic acid in arabidopsis thaliana	Lee et al., 2016: Lee, S.Y., Boon, N.J., Webb, A.A.R., Tanaka, R.J.	Plants perceive information from the surroundings and elicit appropriate molecular responses. How plants dynamically respond to combinations of external inputs is yet to be revealed, despite the detailed current knowledge of intracellular signaling pathways. We measured dynamics of Response-To-Dehydration 29A (RD29A) expression induced by single or combined NaCl and ABA treatments in Arabidopsis …	Rejected	no expression of DREB2
ALL ( dreb2 AND "drought stress" ) AND ( LIMIT-TO ( DOCTYPE , "ar" ) ) AND ( LIMIT-TO ( LANGUAGE , "English" ) ) AND ( EXCLUDE ( SUBJAREA , "MEDI" ) OR EXCLUDE ( SUBJAREA , "NEUR" ) OR EXCLUDE ( SUBJAREA , "PHAR" ) OR EXCLUDE ( SUBJAREA , "VETE" ) OR EXCLUDE ( SUBJAREA , "PHYS" ) OR EXCLUDE ( SUBJAREA , "ECON" ) OR EXCLUDE ( SUBJAREA , "NURS" ) ) AND ( LIMIT-TO ( PUBSTAGE , "final" ) ) AND ( LIMI…	Scopus	Histone modifications and expression of DAM6 gene in peach are modulated during bud dormancy release in a cultivar-dependent manner	Leida et al., 2012: Leida, C., Conesa, A., Llácer, G., Badenes, M.L., Ríos, G.	Bud dormancy release in many woody perennial plants responds to the seasonal accumulation of chilling stimulus. MADS-box transcription factors encoded by DORMANCY ASSOCIATED MADS-box (DAM) genes in peach (Prunus persica) are implicated in this pathway, but other regulatory factors remain to be identified. In addition, the regulation of DAM gene expression is not well known at the molecular level.…	Rejected	no expression of DREB2
ALL ( dreb2 AND "drought stress" ) AND ( LIMIT-TO ( DOCTYPE , "ar" ) ) AND ( LIMIT-TO ( LANGUAGE , "English" ) ) AND ( EXCLUDE ( SUBJAREA , "MEDI" ) OR EXCLUDE ( SUBJAREA , "NEUR" ) OR EXCLUDE ( SUBJAREA , "PHAR" ) OR EXCLUDE ( SUBJAREA , "VETE" ) OR EXCLUDE ( SUBJAREA , "PHYS" ) OR EXCLUDE ( SUBJAREA , "ECON" ) OR EXCLUDE ( SUBJAREA , "NURS" ) ) AND ( LIMIT-TO ( PUBSTAGE , "final" ) ) AND ( LIMI…	Scopus	Silicon biology in crops under abiotic stress: A paradigm shift and cross-talk between genomics and proteomics	Lesharadevi et al., 2021: Lesharadevi, K., Parthasarathi, T., Muneer, S.	Silicon is a beneficial element to improve the biological process, growth, development, and crop productivity. The review mainly focuses on the advantage of crops supplemented with silicon, how Si alleviate abiotic stress as well as regulate the genes and proteins involved in metabolic and biological functions in plants. Abiotic stress causes damage to the proteins, nucleic acids, affect transpir…	Rejected	no fold chnage of DREB2
ALL ( dreb2 AND "drought stress" ) AND ( LIMIT-TO ( DOCTYPE , "ar" ) ) AND ( LIMIT-TO ( LANGUAGE , "English" ) ) AND ( EXCLUDE ( SUBJAREA , "MEDI" ) OR EXCLUDE ( SUBJAREA , "NEUR" ) OR EXCLUDE ( SUBJAREA , "PHAR" ) OR EXCLUDE ( SUBJAREA , "VETE" ) OR EXCLUDE ( SUBJAREA , "PHYS" ) OR EXCLUDE ( SUBJAREA , "ECON" ) OR EXCLUDE ( SUBJAREA , "NURS" ) ) AND ( LIMIT-TO ( PUBSTAGE , "final" ) ) AND ( LIMI…	Scopus	Isolating Soil Drought-Induced Genes from Maize Seediing Leaves Through Suppression Subtractive Hybridization	Li et al., 2007: Li, H.-y., HUANG, S.-h., SHI, Y.-s., SONG, Y.-c., ZHAO, J.-r., WANG, F.-g., WANG, T.-y., LI, Y.	Abstract: In this study, a forward cDNA library was constructed by suppression subtractive hybridization using seedling leaves of CN165, a drought-tolerant maize inbred line. In the suppression subtractive hybridization (SSH) library, 672 positive clones were picked up randomly. After polymerase chain reaction (PCR) of each clone, all the single clones were sequenced. Totally 598 available sequen…	Rejected	no expression of DREB2
ALL ( dreb2 AND "drought stress" ) AND ( LIMIT-TO ( DOCTYPE , "ar" ) ) AND ( LIMIT-TO ( LANGUAGE , "English" ) ) AND ( EXCLUDE ( SUBJAREA , "MEDI" ) OR EXCLUDE ( SUBJAREA , "NEUR" ) OR EXCLUDE ( SUBJAREA , "PHAR" ) OR EXCLUDE ( SUBJAREA , "VETE" ) OR EXCLUDE ( SUBJAREA , "PHYS" ) OR EXCLUDE ( SUBJAREA , "ECON" ) OR EXCLUDE ( SUBJAREA , "NURS" ) ) AND ( LIMIT-TO ( PUBSTAGE , "final" ) ) AND ( LIMI…	Scopus	Two cotton Cys2/His2-type zinc-finger proteins, GhDi19-1 and GhDi19-2, are involved in plant response to salt/drought stress and abscisic acid signaling	Li et al., 2010: Li, G., Tai, F.-J., Zheng, Y., Luo, J., Gong, S.-Y., Zhang, Z.-T., Li, X.-B.	Cotton (Gossypium hirsutum) often encounters abiotic stress such as drought and high salinity during its development, and its productivity is significantly limited by those adverse factors. To investigate the molecular adaptation mechanisms of this plant species to abiotic stress, we identified two genes encoding Di19-like Cys2/His2 zinc-finger proteins in cotton. GFP fluorescence assay demonstra…	Rejected	no expression of DREB2
ALL ( dreb2 AND "drought stress" ) AND ( LIMIT-TO ( DOCTYPE , "ar" ) ) AND ( LIMIT-TO ( LANGUAGE , "English" ) ) AND ( EXCLUDE ( SUBJAREA , "MEDI" ) OR EXCLUDE ( SUBJAREA , "NEUR" ) OR EXCLUDE ( SUBJAREA , "PHAR" ) OR EXCLUDE ( SUBJAREA , "VETE" ) OR EXCLUDE ( SUBJAREA , "PHYS" ) OR EXCLUDE ( SUBJAREA , "ECON" ) OR EXCLUDE ( SUBJAREA , "NURS" ) ) AND ( LIMIT-TO ( PUBSTAGE , "final" ) ) AND ( LIMI…	Scopus	Overexpression of Os2H16 enhances resistance to phytopathogens and tolerance to drought stress in rice	Li et al., 2013: Li, N., Kong, L., Zhou, W., Zhang, X., Wei, S., Ding, X., Chu, Z.	Os2H16, a rice gene of unknown function, has been previously reported to be upregulated in response to infection by Xanthomonas oryzae pv. oryzae. In this study, expression patterns of Os2H16 were analyzed, demonstrating that expression of Os2H16 was dramatically induced by both bacterial and fungal infection as well as by drought stress, but repressed by salt treatment. To further investigate th…	Rejected	no expression of DREB2
ALL ( dreb2 AND "drought stress" ) AND ( LIMIT-TO ( DOCTYPE , "ar" ) ) AND ( LIMIT-TO ( LANGUAGE , "English" ) ) AND ( EXCLUDE ( SUBJAREA , "MEDI" ) OR EXCLUDE ( SUBJAREA , "NEUR" ) OR EXCLUDE ( SUBJAREA , "PHAR" ) OR EXCLUDE ( SUBJAREA , "VETE" ) OR EXCLUDE ( SUBJAREA , "PHYS" ) OR EXCLUDE ( SUBJAREA , "ECON" ) OR EXCLUDE ( SUBJAREA , "NURS" ) ) AND ( LIMIT-TO ( PUBSTAGE , "final" ) ) AND ( LIMI…	Scopus	Overexpression of Arachis hypogaea AREB1 gene enhances drought tolerance by modulating ROS scavenging and maintaining endogenous ABA content	Li et al., 2013: Li, X.-Y., Liu, X., Yao, Y., Li, Y.-H., Liu, S., He, C.-Y., Li, J.-M., Lin, Y.-Y., Li, L.	AhAREB1 (Arachis hypogaea Abscisic-acid Response Element Binding Protein 1) is a member of the basic domain leucine zipper (bZIP)-type transcription factor in peanut. Previously, we found that expression of AhAREB1 was specifically induced by abscisic acid (ABA), dehydration and drought. To understand the drought defense mechanism regulated by AhAREB1, transgenic Arabidopsis overexpressing AhAREB…	Rejected	no expression of DREB2
ALL ( dreb2 AND "drought stress" ) AND ( LIMIT-TO ( DOCTYPE , "ar" ) ) AND ( LIMIT-TO ( LANGUAGE , "English" ) ) AND ( EXCLUDE ( SUBJAREA , "MEDI" ) OR EXCLUDE ( SUBJAREA , "NEUR" ) OR EXCLUDE ( SUBJAREA , "PHAR" ) OR EXCLUDE ( SUBJAREA , "VETE" ) OR EXCLUDE ( SUBJAREA , "PHYS" ) OR EXCLUDE ( SUBJAREA , "ECON" ) OR EXCLUDE ( SUBJAREA , "NURS" ) ) AND ( LIMIT-TO ( PUBSTAGE , "final" ) ) AND ( LIMI…	Scopus	Expression of an Arabidopsis molybdenum cofactor sulphurase gene in soybean enhances drought tolerance and increases yield under field conditions	Li et al., 2013: Li, Y., Zhang, J., Zhang, J., Hao, L., Hua, J., Duan, L., Zhang, M., Li, Z.	LOS5/ABA3 gene encoding molybdenum cofactor sulphurase is involved in aldehyde oxidase (AO) activity in Arabidopsis, which indirectly regulates ABA biosynthesis and increased stress tolerance. Here, we used a constitutive super promoter to drive LOS5/ABA3 overexpression in soybean (Glycine max L.) to enhance drought tolerance in growth chamber and field conditions. Expression of LOS5/ABA3 was up-…	Rejected	no expression of DREB2
ALL ( dreb2 AND "drought stress" ) AND ( LIMIT-TO ( DOCTYPE , "ar" ) ) AND ( LIMIT-TO ( LANGUAGE , "English" ) ) AND ( EXCLUDE ( SUBJAREA , "MEDI" ) OR EXCLUDE ( SUBJAREA , "NEUR" ) OR EXCLUDE ( SUBJAREA , "PHAR" ) OR EXCLUDE ( SUBJAREA , "VETE" ) OR EXCLUDE ( SUBJAREA , "PHYS" ) OR EXCLUDE ( SUBJAREA , "ECON" ) OR EXCLUDE ( SUBJAREA , "NURS" ) ) AND ( LIMIT-TO ( PUBSTAGE , "final" ) ) AND ( LIMI…	Scopus	An ABA-responsive DRE-binding protein gene from Setaria italica, SiARDP, the target gene of SiAREB, plays a critical role under drought stress	Li et al., 2014: Li, C., Yue, J., Wu, X., Xu, C., Yu, J.	The DREB (dehydration-responsive element binding)-type transcription factors regulate the expression of stressinducible genes by binding the DRE/CRT cis-elements in promoter regions. The upstream transcription factors that regulate the transcription of DREB transcription factors have not been clearly defined, although the function of DREB transcription factors in abiotic stress is known. In this …	Rejected	no expression of DREB2
ALL ( dreb2 AND "drought stress" ) AND ( LIMIT-TO ( DOCTYPE , "ar" ) ) AND ( LIMIT-TO ( LANGUAGE , "English" ) ) AND ( EXCLUDE ( SUBJAREA , "MEDI" ) OR EXCLUDE ( SUBJAREA , "NEUR" ) OR EXCLUDE ( SUBJAREA , "PHAR" ) OR EXCLUDE ( SUBJAREA , "VETE" ) OR EXCLUDE ( SUBJAREA , "PHYS" ) OR EXCLUDE ( SUBJAREA , "ECON" ) OR EXCLUDE ( SUBJAREA , "NURS" ) ) AND ( LIMIT-TO ( PUBSTAGE , "final" ) ) AND ( LIMI…	Scopus	Transcriptome Analysis Revealed a Cold Stress-Responsive Transcription Factor, PaDREB1A, in Plumbago auriculata That Can Confer Cold Tolerance in Transgenic Arabidopsis thaliana	Li et al., 2022: Li, W., Gao, S., Lei, T., Jiang, L., Duan, Y., Zhao, Z., Li, J., Shi, L., Yang, L.	The tropical plant Plumbago auriculata can tolerate subzero temperatures without induction of apoptosis after cold acclimation in autumn, making it more cold tolerant than conventional tropical plants. In this study, we found that low temperatures significantly affected the photosynthetic system of P. auriculata. Using transcriptome sequencing, PaDREB1A was identified as a key transcription facto…	Rejected	no expression of DREB2
ALL ( dreb2 AND "drought stress" ) AND ( LIMIT-TO ( DOCTYPE , "ar" ) ) AND ( LIMIT-TO ( LANGUAGE , "English" ) ) AND ( EXCLUDE ( SUBJAREA , "MEDI" ) OR EXCLUDE ( SUBJAREA , "NEUR" ) OR EXCLUDE ( SUBJAREA , "PHAR" ) OR EXCLUDE ( SUBJAREA , "VETE" ) OR EXCLUDE ( SUBJAREA , "PHYS" ) OR EXCLUDE ( SUBJAREA , "ECON" ) OR EXCLUDE ( SUBJAREA , "NURS" ) ) AND ( LIMIT-TO ( PUBSTAGE , "final" ) ) AND ( LIMI…	Scopus	High temperature induces male sterility via MYB66–MYB4–Casein kinase I signaling in cotton	Li et al., 2022: Li, Y., Li, Y., Su, Q., Wu, Y., Zhang, R., Li, Y., Ma, Y., Ma, H., Guo, X., Zhu, L., Min, L., Zhang, X.	High temperature (HT) causes male sterility and decreases crop yields. Our previous works have demonstrated that sugar and auxin signaling pathways, Gossypium hirsutum Casein kinase I (GhCKI), and DNA methylation are all involved in HT-induced male sterility in cotton. However, the signaling mechanisms leading to distinct GhCKI expression patterns induced by HT between HT-tolerant and HT-sensitiv…	Rejected	no expression of DREB2
ALL ( dreb2 AND "drought stress" ) AND ( LIMIT-TO ( DOCTYPE , "ar" ) ) AND ( LIMIT-TO ( LANGUAGE , "English" ) ) AND ( EXCLUDE ( SUBJAREA , "MEDI" ) OR EXCLUDE ( SUBJAREA , "NEUR" ) OR EXCLUDE ( SUBJAREA , "PHAR" ) OR EXCLUDE ( SUBJAREA , "VETE" ) OR EXCLUDE ( SUBJAREA , "PHYS" ) OR EXCLUDE ( SUBJAREA , "ECON" ) OR EXCLUDE ( SUBJAREA , "NURS" ) ) AND ( LIMIT-TO ( PUBSTAGE , "final" ) ) AND ( LIMI…	Scopus	Role of Arabidopsis RAP2.4 in regulating lightand ethylene-mediated developmental processes and drought stress tolerance	Lin et al., 2008: Lin, R.-C., Park, H.-J., Wang, H.-Y.	Light and the plant hormone ethylene regulate many aspects of plant growth and development in an overlapping and interdependent fashion. Little is known regarding how their signal transduction pathways cross-talk to regulate plant development in a coordinated manner. Here, we report functional characterization of an AP2/DREB-type transcription factor, Arabidopsis RAP2.4, in mediating light and et…	Rejected	no fold change of DREB2
ALL ( dreb2 AND "drought stress" ) AND ( LIMIT-TO ( DOCTYPE , "ar" ) ) AND ( LIMIT-TO ( LANGUAGE , "English" ) ) AND ( EXCLUDE ( SUBJAREA , "MEDI" ) OR EXCLUDE ( SUBJAREA , "NEUR" ) OR EXCLUDE ( SUBJAREA , "PHAR" ) OR EXCLUDE ( SUBJAREA , "VETE" ) OR EXCLUDE ( SUBJAREA , "PHYS" ) OR EXCLUDE ( SUBJAREA , "ECON" ) OR EXCLUDE ( SUBJAREA , "NURS" ) ) AND ( LIMIT-TO ( PUBSTAGE , "final" ) ) AND ( LIMI…	Scopus	Epidermal micromorphology and mesophyll structure of populus euphratica heteromorphic leaves at different development stages	Liu et al., 2015: Liu, Y., Li, X., Chen, G., Li, M., Liu, M., Liu, D.	Leaf epidermal micromorphology and mesophyll structure during the development of Populus euphratica heteromorphic leaves, including linear, lanceolate, ovate, dentate ovate, dentate rhombic, dentate broad-ovate and dentate fan-shaped leaves, were studied by using electron and light microscopy. During development of heteromorphic leaves, epidermal appendages (wax crystals and trichomes) and specia…	Rejected	Populus
ALL ( dreb2 AND "drought stress" ) AND ( LIMIT-TO ( DOCTYPE , "ar" ) ) AND ( LIMIT-TO ( LANGUAGE , "English" ) ) AND ( EXCLUDE ( SUBJAREA , "MEDI" ) OR EXCLUDE ( SUBJAREA , "NEUR" ) OR EXCLUDE ( SUBJAREA , "PHAR" ) OR EXCLUDE ( SUBJAREA , "VETE" ) OR EXCLUDE ( SUBJAREA , "PHYS" ) OR EXCLUDE ( SUBJAREA , "ECON" ) OR EXCLUDE ( SUBJAREA , "NURS" ) ) AND ( LIMIT-TO ( PUBSTAGE , "final" ) ) AND ( LIMI…	Scopus	Identified of a novel cis-element regulating the alternative splicing of LcDREB2	Liu et al., 2017: Liu, Z., Yuan, G., Liu, S., Jia, J., Cheng, L., Qi, D., Shen, S., Peng, X., Liu, G.	Alternative splicing (AS) is an important gene regulation mechanism in plants. Despite the widespread use of AS in plant gene expression regulation, the identification of the cis-elements involved in the AS mechanism is rarely reported in plants. To explore the regulation mechanism of the AS of LcDREB2, a DREB2 ortholog from Sheepgrass (Leymus chinensis), the genomic sequences of LcDREB2 and its …	Rejected	no fold change of DREB2
ALL ( dreb2 AND "drought stress" ) AND ( LIMIT-TO ( DOCTYPE , "ar" ) ) AND ( LIMIT-TO ( LANGUAGE , "English" ) ) AND ( EXCLUDE ( SUBJAREA , "MEDI" ) OR EXCLUDE ( SUBJAREA , "NEUR" ) OR EXCLUDE ( SUBJAREA , "PHAR" ) OR EXCLUDE ( SUBJAREA , "VETE" ) OR EXCLUDE ( SUBJAREA , "PHYS" ) OR EXCLUDE ( SUBJAREA , "ECON" ) OR EXCLUDE ( SUBJAREA , "NURS" ) ) AND ( LIMIT-TO ( PUBSTAGE , "final" ) ) AND ( LIMI…	Scopus	Over-expression of a maize n-acetylglutamate kinase gene (ZmNAGK) improves drought tolerance in tobacco	Liu et al., 2019: Liu, W., Xiang, Y., Zhang, X., Han, G., Sun, X., Sheng, Y., Yan, J., Scheller, H.V., Zhang, A.	Water deficit is a key limiting factor that affects the growth, development and productivity of crops. It is vital to understand the mechanisms by which plants respond to drought stress. Here an N-acetylglutamate kinase gene, ZmNAGK, was cloned from maize (Zea mays). ZmNAGK was expressed at high levels in maize leaves and at lower levels in root, stem, female flower and male flower. The expressio…	Rejected	no expression of DREB2
ALL ( dreb2 AND "drought stress" ) AND ( LIMIT-TO ( DOCTYPE , "ar" ) ) AND ( LIMIT-TO ( LANGUAGE , "English" ) ) AND ( EXCLUDE ( SUBJAREA , "MEDI" ) OR EXCLUDE ( SUBJAREA , "NEUR" ) OR EXCLUDE ( SUBJAREA , "PHAR" ) OR EXCLUDE ( SUBJAREA , "VETE" ) OR EXCLUDE ( SUBJAREA , "PHYS" ) OR EXCLUDE ( SUBJAREA , "ECON" ) OR EXCLUDE ( SUBJAREA , "NURS" ) ) AND ( LIMIT-TO ( PUBSTAGE , "final" ) ) AND ( LIMI…	Scopus	Elucidating the role of silicon in drought stress tolerance in plants	Malik et al., 2021: Malik, M.A., Wani, A.H., Mir, S.H., Rehman, I.U., Tahir, I., Ahmad, P., Rashid, I.	Predicted changes in climate, with more severe droughts and more extreme weather variability, are gaining considerable attention from stakeholders because of the already stressed and seriously challenging agricultural ecosystems of the contemporary world. One of the greatest challenges faced by these unique ecosystems due to climate change is drought stress, which affects plant growth, developmen…	Rejected	no fold change of DREB2
ALL ( dreb2 AND "drought stress" ) AND ( LIMIT-TO ( DOCTYPE , "ar" ) ) AND ( LIMIT-TO ( LANGUAGE , "English" ) ) AND ( EXCLUDE ( SUBJAREA , "MEDI" ) OR EXCLUDE ( SUBJAREA , "NEUR" ) OR EXCLUDE ( SUBJAREA , "PHAR" ) OR EXCLUDE ( SUBJAREA , "VETE" ) OR EXCLUDE ( SUBJAREA , "PHYS" ) OR EXCLUDE ( SUBJAREA , "ECON" ) OR EXCLUDE ( SUBJAREA , "NURS" ) ) AND ( LIMIT-TO ( PUBSTAGE , "final" ) ) AND ( LIMI…	Scopus	Transcription factors as key molecular target to strengthen the drought stress tolerance in plants	Manna et al., 2021: Manna, M., Thakur, T., Chirom, O., Mandlik, R., Deshmukh, R., Salvi, P.	Amid apprehension of global climate change, crop plants are inevitably confronted with a myriad of abiotic stress factors during their growth that inflicts a serious threat to their development and overall productivity. These abiotic stresses comprise extreme temperature, pH, high saline soil, and drought stress. Among different abiotic stresses, drought is considered the most calamitous stressor…	Rejected	no fold change of DREB2
ALL ( dreb2 AND "drought stress" ) AND ( LIMIT-TO ( DOCTYPE , "ar" ) ) AND ( LIMIT-TO ( LANGUAGE , "English" ) ) AND ( EXCLUDE ( SUBJAREA , "MEDI" ) OR EXCLUDE ( SUBJAREA , "NEUR" ) OR EXCLUDE ( SUBJAREA , "PHAR" ) OR EXCLUDE ( SUBJAREA , "VETE" ) OR EXCLUDE ( SUBJAREA , "PHYS" ) OR EXCLUDE ( SUBJAREA , "ECON" ) OR EXCLUDE ( SUBJAREA , "NURS" ) ) AND ( LIMIT-TO ( PUBSTAGE , "final" ) ) AND ( LIMI…	Scopus	In vitro evaluation of osmotic stress tolerance using a novel root recovery assay	Maruyama et al., 2008: Maruyama, H., Koyama, R., Oi, T., Yagi, M., Takeda, M., Kanechi, M., Inagaki, N., Uno, Y.	We established a novel in vitro method, termed the root recovery assay, to evaluate the survival under osmotic stress of lettuce (Lactuca sativa L.) seedlings. Under salinity and drought stress, combination of the root-bending assay and root recovery assay showed the same trends in dry weight and survival rate as a hydroponic culture. Both in vitro assays and hydroponics ranked the three lettuce …	Rejected	no expression of DREB2
ALL ( dreb2 AND "drought stress" ) AND ( LIMIT-TO ( DOCTYPE , "ar" ) ) AND ( LIMIT-TO ( LANGUAGE , "English" ) ) AND ( EXCLUDE ( SUBJAREA , "MEDI" ) OR EXCLUDE ( SUBJAREA , "NEUR" ) OR EXCLUDE ( SUBJAREA , "PHAR" ) OR EXCLUDE ( SUBJAREA , "VETE" ) OR EXCLUDE ( SUBJAREA , "PHYS" ) OR EXCLUDE ( SUBJAREA , "ECON" ) OR EXCLUDE ( SUBJAREA , "NURS" ) ) AND ( LIMIT-TO ( PUBSTAGE , "final" ) ) AND ( LIMI…	Scopus	Expression of a Pennisetum glaucum gene DREB2A confers enhanced heat, drought and salinity tolerance in transgenic Arabidopsis	Meena et al., 2022: Meena, R.P., Ghosh, G., Vishwakarma, H., Padaria, J.C.	Background: Pearl millet (Pennisetum glaucum) is an essential cereal crop, whose growth and yield are not impacted by abiotic stresses, such as drought, heat, and cold. The DREB transcription factors (TF) are some of the largest groups of TFs in plants and play varied roles in plant stress response and signal transduction. Methods and results: In the present study, PgDREB2A gene encoding a DREB t…	Rejected	no fold change of DREB2
ALL ( dreb2 AND "drought stress" ) AND ( LIMIT-TO ( DOCTYPE , "ar" ) ) AND ( LIMIT-TO ( LANGUAGE , "English" ) ) AND ( EXCLUDE ( SUBJAREA , "MEDI" ) OR EXCLUDE ( SUBJAREA , "NEUR" ) OR EXCLUDE ( SUBJAREA , "PHAR" ) OR EXCLUDE ( SUBJAREA , "VETE" ) OR EXCLUDE ( SUBJAREA , "PHYS" ) OR EXCLUDE ( SUBJAREA , "ECON" ) OR EXCLUDE ( SUBJAREA , "NURS" ) ) AND ( LIMIT-TO ( PUBSTAGE , "final" ) ) AND ( LIMI…	Scopus	Coordinated mechanisms of leaves and roots in response to drought stress underlying full-length transcriptome profiling in Vicia sativa L	Min et al., 2020: Min, X., Lin, X., Ndayambaza, B., Wang, Y., Liu, W.	Common vetch (Vicia sativa L.) is an important self-pollinating annual forage legume and is of interest for drought prone regions as a protein source to feed livestock and human consumption. However, the development and production of common vetch are negatively affected by drought stress. Plants have evolved common or distinct metabolic pathways between the aboveground and underground in response…	Rejected	no expression of DREB2
ALL ( dreb2 AND "drought stress" ) AND ( LIMIT-TO ( DOCTYPE , "ar" ) ) AND ( LIMIT-TO ( LANGUAGE , "English" ) ) AND ( EXCLUDE ( SUBJAREA , "MEDI" ) OR EXCLUDE ( SUBJAREA , "NEUR" ) OR EXCLUDE ( SUBJAREA , "PHAR" ) OR EXCLUDE ( SUBJAREA , "VETE" ) OR EXCLUDE ( SUBJAREA , "PHYS" ) OR EXCLUDE ( SUBJAREA , "ECON" ) OR EXCLUDE ( SUBJAREA , "NURS" ) ) AND ( LIMIT-TO ( PUBSTAGE , "final" ) ) AND ( LIMI…	Scopus	Identification of candidate network hubs involved in metabolic adjustments of rice under drought stress by integrating transcriptome data and genome-scale metabolic network	Mohanty et al., 2016: Mohanty, B., Kitazumi, A., Cheung, C.Y.M., Lakshmanan, M., de los Reyes, B.G., Jang, I.-C., Lee, D.-Y.	In this study, we have integrated a rice genome-scale metabolic network and the transcriptome of a drought-tolerant rice line, DK151, to identify the major transcriptional regulators involved in metabolic adjustments necessary for adaptation to drought. This was achieved by examining the differential expressions of transcription factors and metabolic genes in leaf, root and young panicle of rice …	Rejected	no fold change of DREB2
ALL ( dreb2 AND "drought stress" ) AND ( LIMIT-TO ( DOCTYPE , "ar" ) ) AND ( LIMIT-TO ( LANGUAGE , "English" ) ) AND ( EXCLUDE ( SUBJAREA , "MEDI" ) OR EXCLUDE ( SUBJAREA , "NEUR" ) OR EXCLUDE ( SUBJAREA , "PHAR" ) OR EXCLUDE ( SUBJAREA , "VETE" ) OR EXCLUDE ( SUBJAREA , "PHYS" ) OR EXCLUDE ( SUBJAREA , "ECON" ) OR EXCLUDE ( SUBJAREA , "NURS" ) ) AND ( LIMIT-TO ( PUBSTAGE , "final" ) ) AND ( LIMI…	Scopus	SuperSAGE: The drought stress-responsive transcriptome of chickpea roots	Molina et al., 2008: Molina, C., Rotter, B., Horres, R., Udupa, S.M., Besser, B., Bellarmino, L., Baum, M., Matsumura, H., Terauchi, R., Kahl, G., Winter, P.	Drought is the major constraint to increase yield in chickpea (Cicer arietinum). Improving drought tolerance is therefore of outmost importance for breeding. However, the complexity of the trait allowed only marginal progress. A solution to the current stagnation is expected from innovative molecular tools such as transcriptome analyses providing insight into stress-related gene activity, which c…	Rejected	no expression of DREB2
ALL ( dreb2 AND "drought stress" ) AND ( LIMIT-TO ( DOCTYPE , "ar" ) ) AND ( LIMIT-TO ( LANGUAGE , "English" ) ) AND ( EXCLUDE ( SUBJAREA , "MEDI" ) OR EXCLUDE ( SUBJAREA , "NEUR" ) OR EXCLUDE ( SUBJAREA , "PHAR" ) OR EXCLUDE ( SUBJAREA , "VETE" ) OR EXCLUDE ( SUBJAREA , "PHYS" ) OR EXCLUDE ( SUBJAREA , "ECON" ) OR EXCLUDE ( SUBJAREA , "NURS" ) ) AND ( LIMIT-TO ( PUBSTAGE , "final" ) ) AND ( LIMI…	Scopus	Morpho-physiological and biochemical changes in finger millet [Eleusine coracana (L.) Gaertn.] under drought stress	Mude et al., 2020: Mude, L.N., Mondam, M., Gujjula, V., Jinka, S., Pinjari, O.B., Yellodu Adi Reddy, N., Patan, S.S.V.K.	Finger millet (Eleusine coracana L. Gaertn.) is a nutritious and climate-resilient crop with a C4 type carbon fixation pathway. The present study was aimed to assess the drought tolerance capacities of four finger millet genotypes based on their physiological and biochemical characteristics at three different phenological stages. Finger millet genotypes RAU 8, GPU 67, GPU 28 and MS 9272 were subj…	Rejected	no expression of DREB2
ALL ( dreb2 AND "drought stress" ) AND ( LIMIT-TO ( DOCTYPE , "ar" ) ) AND ( LIMIT-TO ( LANGUAGE , "English" ) ) AND ( EXCLUDE ( SUBJAREA , "MEDI" ) OR EXCLUDE ( SUBJAREA , "NEUR" ) OR EXCLUDE ( SUBJAREA , "PHAR" ) OR EXCLUDE ( SUBJAREA , "VETE" ) OR EXCLUDE ( SUBJAREA , "PHYS" ) OR EXCLUDE ( SUBJAREA , "ECON" ) OR EXCLUDE ( SUBJAREA , "NURS" ) ) AND ( LIMIT-TO ( PUBSTAGE , "final" ) ) AND ( LIMI…	Scopus	Profile and Time-Scale Dynamics of Differentially Expressed Genes in Transcriptome of Populus davidiana Under Drought Stress	Mun et al., 2017: Mun, B.-G., Hussain, A., Park, E.-J., Lee, S.-U., Sharma, A., Imran, Q.M., Jung, K.-H., Yun, B.-W.	The genus Populus contains 25–35 species of deciduous flowering plants in the family Salicaceae. It has evolved to overcome various environmental stresses including drought stress through changes in physiological processes such a stomatal movement, photosynthesis, stress signaling, defense responses, and overall growth rate. In this study, we performed RNA-seq-based transcriptome profiling of Pop…	Rejected	Populus
ALL ( dreb2 AND "drought stress" ) AND ( LIMIT-TO ( DOCTYPE , "ar" ) ) AND ( LIMIT-TO ( LANGUAGE , "English" ) ) AND ( EXCLUDE ( SUBJAREA , "MEDI" ) OR EXCLUDE ( SUBJAREA , "NEUR" ) OR EXCLUDE ( SUBJAREA , "PHAR" ) OR EXCLUDE ( SUBJAREA , "VETE" ) OR EXCLUDE ( SUBJAREA , "PHYS" ) OR EXCLUDE ( SUBJAREA , "ECON" ) OR EXCLUDE ( SUBJAREA , "NURS" ) ) AND ( LIMIT-TO ( PUBSTAGE , "final" ) ) AND ( LIMI…	Scopus	Characterization of the transcriptome of the xerophyte ammopiptanthus mongolicus leaves under drought stress by 454 pyrosequencing	Pang et al., 2015: Pang, T., Guo, L., Shim, D., Cannon, N., Tang, S., Chen, J., Xia, X., Yin, W., Carlson, J.E.	Background Ammopiptanthus mongolicus (Maxim. Ex Kom.) Cheng f., an endangered ancient legume species, endemic to the Gobi desert in north-western China. As the only evergreen broadleaf shrub in this area, A. mongolicus plays an important role in the region's ecological-environmental stability. Despite the strong potential of A. mongolicus in providing new insights on drought tolerance, sequence i…	Rejected	no fold change of DREB2
ALL ( dreb2 AND "drought stress" ) AND ( LIMIT-TO ( DOCTYPE , "ar" ) ) AND ( LIMIT-TO ( LANGUAGE , "English" ) ) AND ( EXCLUDE ( SUBJAREA , "MEDI" ) OR EXCLUDE ( SUBJAREA , "NEUR" ) OR EXCLUDE ( SUBJAREA , "PHAR" ) OR EXCLUDE ( SUBJAREA , "VETE" ) OR EXCLUDE ( SUBJAREA , "PHYS" ) OR EXCLUDE ( SUBJAREA , "ECON" ) OR EXCLUDE ( SUBJAREA , "NURS" ) ) AND ( LIMIT-TO ( PUBSTAGE , "final" ) ) AND ( LIMI…	Scopus	Isolation of cDNAs differentially expressed in response to drought stress and characterization of the Ca-LEAL1 gene encoding a new family of atypical LEA-like protein homologue in hot pepper (Capsicum annuum L. cv. Pukang)	Park et al., 2003: Park, J.-A., Cho, S.K., Kim, J.E., Chung, H.S., Hong, J.-P., Hwang, B., Hong, C.B., Kim, W.T.	Among various abiotic stresses, water deficit is one of the most severe environmental factors responsible for the reduction of crop yield in many parts of the world. By means of the mRNA differential display technique, seven cDNAs (pCa-DIs for Capsicum annuum drought induced) have been isolated that are rapidly induced when hot pepper plants are subjected to water stress (5-20% loss of fresh weig…	Rejected	no expression of DREB2
ALL ( dreb2 AND "drought stress" ) AND ( LIMIT-TO ( DOCTYPE , "ar" ) ) AND ( LIMIT-TO ( LANGUAGE , "English" ) ) AND ( EXCLUDE ( SUBJAREA , "MEDI" ) OR EXCLUDE ( SUBJAREA , "NEUR" ) OR EXCLUDE ( SUBJAREA , "PHAR" ) OR EXCLUDE ( SUBJAREA , "VETE" ) OR EXCLUDE ( SUBJAREA , "PHYS" ) OR EXCLUDE ( SUBJAREA , "ECON" ) OR EXCLUDE ( SUBJAREA , "NURS" ) ) AND ( LIMIT-TO ( PUBSTAGE , "final" ) ) AND ( LIMI…	Scopus	Overexpression of the GmDREB2 gene increases proline accumulation and tolerance to drought stress in soybean plants	Pham et al., 2020: Pham, T.T.N., Nguyen, H.Q., Nguyen, T.N.L., Dao, X.T., Sy, D.T., Le, V.S., Chu, H.M.	The dehydration responsive element binding (DREB) is a plant protein subfamily expressed when soybean plants face abiotic stresses. These DREB proteins are also considered to activate the transcription of drought-resistant genes. In this study, we present the determined results of relationships between overexpression of Glycine max DREB2 (GmDREB2) with the transcription level of Glycine max pyrro…	Rejected	no expression of DREB2
ALL ( dreb2 AND "drought stress" ) AND ( LIMIT-TO ( DOCTYPE , "ar" ) ) AND ( LIMIT-TO ( LANGUAGE , "English" ) ) AND ( EXCLUDE ( SUBJAREA , "MEDI" ) OR EXCLUDE ( SUBJAREA , "NEUR" ) OR EXCLUDE ( SUBJAREA , "PHAR" ) OR EXCLUDE ( SUBJAREA , "VETE" ) OR EXCLUDE ( SUBJAREA , "PHYS" ) OR EXCLUDE ( SUBJAREA , "ECON" ) OR EXCLUDE ( SUBJAREA , "NURS" ) ) AND ( LIMIT-TO ( PUBSTAGE , "final" ) ) AND ( LIMI…	Scopus	Unraveling the molecular basis of oxidative stress management in a drought tolerant rice genotype Nagina 22	Prakash et al., 2016: Prakash, C., Mithra, S.V.A., Singh, P.K., Mohapatra, T., Singh, N.K.	Drought stress tolerance for crop improvement is an important goal worldwide. Drought is a complex trait, and it is vital to understand the complex physiological, biochemical, and molecular mechanisms of drought tolerance to tackle it effectively. Osmotic adjustment, oxidative stress management (OSM), and cell membrane stability (CMS) are major components of cellular tolerance under drought stres…	Rejected	no expression of DREB2
ALL ( dreb2 AND "drought stress" ) AND ( LIMIT-TO ( DOCTYPE , "ar" ) ) AND ( LIMIT-TO ( LANGUAGE , "English" ) ) AND ( EXCLUDE ( SUBJAREA , "MEDI" ) OR EXCLUDE ( SUBJAREA , "NEUR" ) OR EXCLUDE ( SUBJAREA , "PHAR" ) OR EXCLUDE ( SUBJAREA , "VETE" ) OR EXCLUDE ( SUBJAREA , "PHYS" ) OR EXCLUDE ( SUBJAREA , "ECON" ) OR EXCLUDE ( SUBJAREA , "NURS" ) ) AND ( LIMIT-TO ( PUBSTAGE , "final" ) ) AND ( LIMI…	Scopus	Transcriptomic responses to drought stress in Polygonatum kingianum tuber	Qian et al., 2021: Qian, H., Xu, Z., Cong, K., Zhu, X., Zhang, L., Wang, J., Wei, J., Ji, P.	Polygonatum kingianum Coll. et Hemsl. is an important plant in Traditional Chinese Medicine. The extracts from its tubers are rich in polysaccharides and other metabolites such as saponins. It is a well-known concept that growing medicinal plants in semi-arid (or drought stress) increases their natural compounds concentrations. This study was conducted to explore the morpho-physiological response…	Rejected	no expression of DREB2
ALL ( dreb2 AND "drought stress" ) AND ( LIMIT-TO ( DOCTYPE , "ar" ) ) AND ( LIMIT-TO ( LANGUAGE , "English" ) ) AND ( EXCLUDE ( SUBJAREA , "MEDI" ) OR EXCLUDE ( SUBJAREA , "NEUR" ) OR EXCLUDE ( SUBJAREA , "PHAR" ) OR EXCLUDE ( SUBJAREA , "VETE" ) OR EXCLUDE ( SUBJAREA , "PHYS" ) OR EXCLUDE ( SUBJAREA , "ECON" ) OR EXCLUDE ( SUBJAREA , "NURS" ) ) AND ( LIMIT-TO ( PUBSTAGE , "final" ) ) AND ( LIMI…	Scopus	Regulation and functional analysis of ZmDREB2A in response to drought and heat stresses in Zea mays L	Qin et al., 2007: Qin, F., Kakimoto, M., Sakuma, Y., Maruyama, K., Osakabe, Y., Tran, L.-S.P., Shinozaki, K., Yamaguchi-Shinozaki, K.	DREB1/CBFs and DREB2s are transcription factors that specifically interact with a cis-acting element, DRE/CRT, which is involved in the expression of genes responsive to cold and drought stress in Arabidopsis thaliana. The function of DREB1/CBFs has been precisely analyzed and it has been found to activate the expression of many genes responsive to cold stress containing a DRE/CRT sequence in the…	Rejected	no expression of DREB2
ALL ( dreb2 AND "drought stress" ) AND ( LIMIT-TO ( DOCTYPE , "ar" ) ) AND ( LIMIT-TO ( LANGUAGE , "English" ) ) AND ( EXCLUDE ( SUBJAREA , "MEDI" ) OR EXCLUDE ( SUBJAREA , "NEUR" ) OR EXCLUDE ( SUBJAREA , "PHAR" ) OR EXCLUDE ( SUBJAREA , "VETE" ) OR EXCLUDE ( SUBJAREA , "PHYS" ) OR EXCLUDE ( SUBJAREA , "ECON" ) OR EXCLUDE ( SUBJAREA , "NURS" ) ) AND ( LIMIT-TO ( PUBSTAGE , "final" ) ) AND ( LIMI…	Scopus	A MYB gene from wheat (Triticum aestivum L.) is up-regulated during salt and drought stresses and differentially regulated between salt-tolerant and sensitive genotypes	Rahaie et al., 2010: Rahaie, M., Xue, G.-P., Naghavi, M.R., Alizadeh, H., Schenk, P.M.	Crop adaptation to abiotic stresses requires alterations in expression of a large number of stress protection genes and their regulators, including transcription factors. In this study, the expression levels of ten MYB transcription factor genes from wheat (Triticum aestivum) were examined in two recombinant inbred lines contrasting in their salt tolerance in response to salt or drought stress. Q…	Rejected	no expression of DREB2
ALL ( dreb2 AND "drought stress" ) AND ( LIMIT-TO ( DOCTYPE , "ar" ) ) AND ( LIMIT-TO ( LANGUAGE , "English" ) ) AND ( EXCLUDE ( SUBJAREA , "MEDI" ) OR EXCLUDE ( SUBJAREA , "NEUR" ) OR EXCLUDE ( SUBJAREA , "PHAR" ) OR EXCLUDE ( SUBJAREA , "VETE" ) OR EXCLUDE ( SUBJAREA , "PHYS" ) OR EXCLUDE ( SUBJAREA , "ECON" ) OR EXCLUDE ( SUBJAREA , "NURS" ) ) AND ( LIMIT-TO ( PUBSTAGE , "final" ) ) AND ( LIMI…	Scopus	Stress-inducible expression of AtDREB1A transcription factor greatly improves drought stress tolerance in transgenic indica rice	Ravikumar et al., 2014: Ravikumar, G., Manimaran, P., Voleti, S.R., Subrahmanyam, D., Sundaram, R.M., Bansal, K.C., Viraktamath, B.C., Balachandran, S.M.	The cultivation of rice (Oryza sativa L.), a major food crop, requires ample water (30 % of the fresh water available worldwide), and its productivity is greatly affected by drought, the most significant environmental factor. Much research has focussed on identifying quantitative trait loci, stress-regulated genes and transcription factors that will contribute towards the development of climate-r…	Rejected	no fold change of DREB2
ALL ( dreb2 AND "drought stress" ) AND ( LIMIT-TO ( DOCTYPE , "ar" ) ) AND ( LIMIT-TO ( LANGUAGE , "English" ) ) AND ( EXCLUDE ( SUBJAREA , "MEDI" ) OR EXCLUDE ( SUBJAREA , "NEUR" ) OR EXCLUDE ( SUBJAREA , "PHAR" ) OR EXCLUDE ( SUBJAREA , "VETE" ) OR EXCLUDE ( SUBJAREA , "PHYS" ) OR EXCLUDE ( SUBJAREA , "ECON" ) OR EXCLUDE ( SUBJAREA , "NURS" ) ) AND ( LIMIT-TO ( PUBSTAGE , "final" ) ) AND ( LIMI…	Scopus	Mechanistic Insights Into Trehalose-Mediated Cold Stress Tolerance in Rapeseed (Brassica napus L.) Seedlings	Raza et al., 2022: Raza, A., Su, W., Jia, Z., Luo, D., Zhang, Y., Gao, A., Hussain, M.A., Mehmood, S.S., Cheng, Y., Lv, Y., Zou, X.	Cold stress (CS) severely affects several physiological, biochemical, and molecular mechanisms and limits the growth and production of rapeseed (Brassica napus L.). Trehalose (Tre) acts as a growth modulator, which is extensively used to improve the tolerance to multiple plant stresses. Further, Tre also serves as an external force in inducing plant signaling molecules, regulating the expression …	Rejected	no expression of DREB2
ALL ( dreb2 AND "drought stress" ) AND ( LIMIT-TO ( DOCTYPE , "ar" ) ) AND ( LIMIT-TO ( LANGUAGE , "English" ) ) AND ( EXCLUDE ( SUBJAREA , "MEDI" ) OR EXCLUDE ( SUBJAREA , "NEUR" ) OR EXCLUDE ( SUBJAREA , "PHAR" ) OR EXCLUDE ( SUBJAREA , "VETE" ) OR EXCLUDE ( SUBJAREA , "PHYS" ) OR EXCLUDE ( SUBJAREA , "ECON" ) OR EXCLUDE ( SUBJAREA , "NURS" ) ) AND ( LIMIT-TO ( PUBSTAGE , "final" ) ) AND ( LIMI…	Scopus	ABO3, a WRKY transcription factor, mediates plant responses to abscisic acid and drought tolerance in Arabidopsis	Ren et al., 2010: Ren, X., Chen, Z., Liu, Y., Zhang, H., Zhang, M., Liu, Q., Hong, X., Zhu, J.-K., Gong, Z.	The biological functions of WRKY transcription factors in plants have been widely studied, but their roles in abiotic stress are still not well understood. We isolated an ABA overly sensitive mutant, abo3, which is disrupted by a T-DNA insertion in At1g66600 encoding a WRKY transcription factor AtWRKY63. The mutant was hypersensitive to ABA in both seedling establishment and seedling growth. Howe…	Rejected	no expression of DREB2
ALL ( dreb2 AND "drought stress" ) AND ( LIMIT-TO ( DOCTYPE , "ar" ) ) AND ( LIMIT-TO ( LANGUAGE , "English" ) ) AND ( EXCLUDE ( SUBJAREA , "MEDI" ) OR EXCLUDE ( SUBJAREA , "NEUR" ) OR EXCLUDE ( SUBJAREA , "PHAR" ) OR EXCLUDE ( SUBJAREA , "VETE" ) OR EXCLUDE ( SUBJAREA , "PHYS" ) OR EXCLUDE ( SUBJAREA , "ECON" ) OR EXCLUDE ( SUBJAREA , "NURS" ) ) AND ( LIMIT-TO ( PUBSTAGE , "final" ) ) AND ( LIMI…	Scopus	The ERF transcription factor TaERF3 promotes tolerance to salt and drought stresses in wheat	Rong et al., 2014: Rong, W., Qi, L., Wang, A., Ye, X., Du, L., Liang, H., Xin, Z., Zhang, Z.	Salinity and drought are major limiting factors of wheat (Triticum aestivum) productivity worldwide. Here, we report the function of a wheat ERF transcription factor TaERF3 in salt and drought responses and the underlying mechanism of TaERF3 function. Upon treatment with 250 mm NaCl or 20% polyethylene glycol (PEG), transcript levels of TaERF3 were rapidly induced in wheat. Using wheat cultivar Y…	Rejected	no expression of DREB2
ALL ( dreb2 AND "drought stress" ) AND ( LIMIT-TO ( DOCTYPE , "ar" ) ) AND ( LIMIT-TO ( LANGUAGE , "English" ) ) AND ( EXCLUDE ( SUBJAREA , "MEDI" ) OR EXCLUDE ( SUBJAREA , "NEUR" ) OR EXCLUDE ( SUBJAREA , "PHAR" ) OR EXCLUDE ( SUBJAREA , "VETE" ) OR EXCLUDE ( SUBJAREA , "PHYS" ) OR EXCLUDE ( SUBJAREA , "ECON" ) OR EXCLUDE ( SUBJAREA , "NURS" ) ) AND ( LIMIT-TO ( PUBSTAGE , "final" ) ) AND ( LIMI…	Scopus	Expression profiling of DREB1 and evaluation of vegetation indices in contrasting wheat genotypes exposed to drought stress	Rustamova et al., 2021: Rustamova, S., Shrestha, A., Naz, A.A., Huseynova, I.	DREBs, the Dehydration Responsive Element binding proteins belonging to the superfamily of AP2/ERF plant transcription factors regulate diverse processes of plant development and stress responses. The expression level of DREB1 transcription factor gene was examined under drought in wheat genotypes of Azerbaijani origin differing in drought resistance: two tetraploid wheat (Triticum durum Desf.), …	Rejected	no expression of DREB2
ALL ( dreb2 AND "drought stress" ) AND ( LIMIT-TO ( DOCTYPE , "ar" ) ) AND ( LIMIT-TO ( LANGUAGE , "English" ) ) AND ( EXCLUDE ( SUBJAREA , "MEDI" ) OR EXCLUDE ( SUBJAREA , "NEUR" ) OR EXCLUDE ( SUBJAREA , "PHAR" ) OR EXCLUDE ( SUBJAREA , "VETE" ) OR EXCLUDE ( SUBJAREA , "PHYS" ) OR EXCLUDE ( SUBJAREA , "ECON" ) OR EXCLUDE ( SUBJAREA , "NURS" ) ) AND ( LIMIT-TO ( PUBSTAGE , "final" ) ) AND ( LIMI…	Scopus	Jacalin domain-containing protein OsSalT interacts with OsDREB2A and OsNAC1 to impart drought stress tolerance in planta	Sahid et al., 2021: Sahid, S., Roy, C., Shee, D., Datta, R., Paul, S.	With the changing climatic conditions, drought has become one of the most threatening abiotic stress factors that adversely affect rice cultivation and productivity. Although the involvement of the jacalin domain-containing protein, OsSalT, has been reported in drought and salinity tolerance, its functional mechanism still remains largely unexplored. In this study, expression of the OsSalT gene w…	Rejected	no fold change of DREB2
ALL ( dreb2 AND "drought stress" ) AND ( LIMIT-TO ( DOCTYPE , "ar" ) ) AND ( LIMIT-TO ( LANGUAGE , "English" ) ) AND ( EXCLUDE ( SUBJAREA , "MEDI" ) OR EXCLUDE ( SUBJAREA , "NEUR" ) OR EXCLUDE ( SUBJAREA , "PHAR" ) OR EXCLUDE ( SUBJAREA , "VETE" ) OR EXCLUDE ( SUBJAREA , "PHYS" ) OR EXCLUDE ( SUBJAREA , "ECON" ) OR EXCLUDE ( SUBJAREA , "NURS" ) ) AND ( LIMIT-TO ( PUBSTAGE , "final" ) ) AND ( LIMI…	Scopus	The arabidopsis transcription factor NAC016 promotes drought stress responses by repressing AREB1 transcription through a trifurcate feed-forward regulatory loop involving NAP	Sakuraba et al., 2015: Sakuraba, Y., Kim, Y.-S., Han, S.-H., Lee, B.-D., Paek, N.-C.	Drought and other abiotic stresses negatively affect plant growth and development and thus reduce productivity. The plant-specific NAM/ATAF1/2/CUC2 (NAC) transcription factors have important roles in abiotic stress-responsive signaling. Here, we show that Arabidopsis thaliana NAC016 is involved in drought stress responses; nac016 mutants have high drought tolerance, and NAC016-overexpressing (NAC…	Rejected	no expression of DREB2
ALL ( dreb2 AND "drought stress" ) AND ( LIMIT-TO ( DOCTYPE , "ar" ) ) AND ( LIMIT-TO ( LANGUAGE , "English" ) ) AND ( EXCLUDE ( SUBJAREA , "MEDI" ) OR EXCLUDE ( SUBJAREA , "NEUR" ) OR EXCLUDE ( SUBJAREA , "PHAR" ) OR EXCLUDE ( SUBJAREA , "VETE" ) OR EXCLUDE ( SUBJAREA , "PHYS" ) OR EXCLUDE ( SUBJAREA , "ECON" ) OR EXCLUDE ( SUBJAREA , "NURS" ) ) AND ( LIMIT-TO ( PUBSTAGE , "final" ) ) AND ( LIMI…	Scopus	Overexpression of the ethylene-responsive factor gene BrERF4 from Brassica rapa increases tolerance to salt and drought in Arabidopsis plants	Seo et al., 2010: Seo, Y.J., Park, J.-B., Cho, Y.-J., Jung, C., Seo, H.S., Park, S.-K., Nahm, B.H., Song, J.T.	Ethylene-responsive factors (ERFs), within a subgroup of the AP2/ERF transcription factor family, are involved in diverse plant reactions to biotic or abiotic stresses. Here, we report that overexpression of an ERF gene from Brassica rapa ssp. pekinensis (BrERF4) led to improved tolerance to salt and drought stresses in Arabidopsis. It also significantly affected the growth and development of tra…	Rejected	no expression of DREB2
ALL ( dreb2 AND "drought stress" ) AND ( LIMIT-TO ( DOCTYPE , "ar" ) ) AND ( LIMIT-TO ( LANGUAGE , "English" ) ) AND ( EXCLUDE ( SUBJAREA , "MEDI" ) OR EXCLUDE ( SUBJAREA , "NEUR" ) OR EXCLUDE ( SUBJAREA , "PHAR" ) OR EXCLUDE ( SUBJAREA , "VETE" ) OR EXCLUDE ( SUBJAREA , "PHYS" ) OR EXCLUDE ( SUBJAREA , "ECON" ) OR EXCLUDE ( SUBJAREA , "NURS" ) ) AND ( LIMIT-TO ( PUBSTAGE , "final" ) ) AND ( LIMI…	Scopus	Arabidopsis PUB22 and PUB23 are homologous U-Box E3 ubiquitin ligases that play combinatory roles in response to drought stress	Seok et al., 2008: Seok, K.C., Moon, Y.R., Song, C., Kwak, J.M., Woo, T.K.	Ubiquitination is involved in diverse cellular processes in higher plants. In this report, we describe Arabidopsis thaliana PUB22 and PUB23, two homologous U-box-containing E3 ubiquitin (Ub) ligases. The PUB22 and PUB23 genes were rapidly and coordinately induced by abiotic stresses but not by abscisic acid. PUB22- and PUB23-overexpressing transgenic plants were hypersensitive to drought stress. …	Rejected	no expression of DREB2
ALL ( dreb2 AND "drought stress" ) AND ( LIMIT-TO ( DOCTYPE , "ar" ) ) AND ( LIMIT-TO ( LANGUAGE , "English" ) ) AND ( EXCLUDE ( SUBJAREA , "MEDI" ) OR EXCLUDE ( SUBJAREA , "NEUR" ) OR EXCLUDE ( SUBJAREA , "PHAR" ) OR EXCLUDE ( SUBJAREA , "VETE" ) OR EXCLUDE ( SUBJAREA , "PHYS" ) OR EXCLUDE ( SUBJAREA , "ECON" ) OR EXCLUDE ( SUBJAREA , "NURS" ) ) AND ( LIMIT-TO ( PUBSTAGE , "final" ) ) AND ( LIMI…	Scopus	FTICR mass spectrometry-based multivariate analysis to explore distinctive metabolites and metabolic pathways: A comprehensive bioanalytical strategy toward time-course metabolic profiling of Thymus vulgaris plants responding to drought stress	Shahbazy et al., 2020: Shahbazy, M., Moradi, P., Ertaylan, G., Zahraei, A., Kompany-Zareh, M.	In this research, metabolic profiling/pathways of Thymus vulgaris (thyme) plant were assessed during a water deficit stress using an FTICR mass spectrometry-based metabolomics strategy incorporating multivariate data analysis and bioinformatics techniques. Herein, differences of MS signals in specific time courses after water deficit stress and control cases without any timing period were disting…	Rejected	no expression of DREB2
ALL ( dreb2 AND "drought stress" ) AND ( LIMIT-TO ( DOCTYPE , "ar" ) ) AND ( LIMIT-TO ( LANGUAGE , "English" ) ) AND ( EXCLUDE ( SUBJAREA , "MEDI" ) OR EXCLUDE ( SUBJAREA , "NEUR" ) OR EXCLUDE ( SUBJAREA , "PHAR" ) OR EXCLUDE ( SUBJAREA , "VETE" ) OR EXCLUDE ( SUBJAREA , "PHYS" ) OR EXCLUDE ( SUBJAREA , "ECON" ) OR EXCLUDE ( SUBJAREA , "NURS" ) ) AND ( LIMIT-TO ( PUBSTAGE , "final" ) ) AND ( LIMI…	Scopus	Differential and developmental stage specific abundance of Zmdreb2a mRNA transcripts under drought stress and root development in Zea mays (L.)	Sharma et al., 2019: Sharma, R., Azad, M., Nunia, V., Kothari, S.L., Kachhwaha, S.	Environmental stress constraints like temperature, drought and salinity affect plant growth, development and productivity negatively. In maize (Zea mays L.) water-deficiency affects flowering, pollination and embryo development. Transgenic plants having drought tolerance is a priority target in maize breeding programs worldwide. Various transcription factors play a key role in plant development a…	Rejected	no fold change of DREB2
ALL ( dreb2 AND "drought stress" ) AND ( LIMIT-TO ( DOCTYPE , "ar" ) ) AND ( LIMIT-TO ( LANGUAGE , "English" ) ) AND ( EXCLUDE ( SUBJAREA , "MEDI" ) OR EXCLUDE ( SUBJAREA , "NEUR" ) OR EXCLUDE ( SUBJAREA , "PHAR" ) OR EXCLUDE ( SUBJAREA , "VETE" ) OR EXCLUDE ( SUBJAREA , "PHYS" ) OR EXCLUDE ( SUBJAREA , "ECON" ) OR EXCLUDE ( SUBJAREA , "NURS" ) ) AND ( LIMIT-TO ( PUBSTAGE , "final" ) ) AND ( LIMI…	Scopus	An apple transcription factor, MdDREB76, confers salt and drought tolerance in transgenic tobacco by activating the expression of stress-responsive genes	Sharma et al., 2019: Sharma, V., Goel, P., Kumar, S., Singh, A.K.	Key message: An apple gene, MdDREB76 encodes a functional transcription factor and imparts salinity and drought stress endurance to transgenic tobacco by activating expression of stress-responsive genes. Abstract: The dehydration-responsive element (DRE)-binding protein (DREB) transcription factors are well known to be involved in regulating abiotic stress-mediated gene expression in plants. In t…	Rejected	About apple
ALL ( dreb2 AND "drought stress" ) AND ( LIMIT-TO ( DOCTYPE , "ar" ) ) AND ( LIMIT-TO ( LANGUAGE , "English" ) ) AND ( EXCLUDE ( SUBJAREA , "MEDI" ) OR EXCLUDE ( SUBJAREA , "NEUR" ) OR EXCLUDE ( SUBJAREA , "PHAR" ) OR EXCLUDE ( SUBJAREA , "VETE" ) OR EXCLUDE ( SUBJAREA , "PHYS" ) OR EXCLUDE ( SUBJAREA , "ECON" ) OR EXCLUDE ( SUBJAREA , "NURS" ) ) AND ( LIMIT-TO ( PUBSTAGE , "final" ) ) AND ( LIMI…	Scopus	Genome-wide identification and expression analysis of DREB genes in alfalfa (Medicago sativa) in response to cold stress	Sheng et al., 2022: Sheng, S., Guo, X., Wu, C., Xiang, Y., Duan, S., Yang, W., Li, W., Cao, F., Liu, L.	Dehydration-responsive element-binding proteins (DREBs) belong to members of the AP2/ERF transcription factor superfamily, which has been reported to involve various abiotic-stress responses and tolerance in plants. However, research on the DREB-family is still limited in alfalfa (Medicago sativa L.), a forage legume cultivated worldwide. The recent genome-sequence release of the alfalfa cultivar…	Rejected	no expression of DREB2
ALL ( dreb2 AND "drought stress" ) AND ( LIMIT-TO ( DOCTYPE , "ar" ) ) AND ( LIMIT-TO ( LANGUAGE , "English" ) ) AND ( EXCLUDE ( SUBJAREA , "MEDI" ) OR EXCLUDE ( SUBJAREA , "NEUR" ) OR EXCLUDE ( SUBJAREA , "PHAR" ) OR EXCLUDE ( SUBJAREA , "VETE" ) OR EXCLUDE ( SUBJAREA , "PHYS" ) OR EXCLUDE ( SUBJAREA , "ECON" ) OR EXCLUDE ( SUBJAREA , "NURS" ) ) AND ( LIMIT-TO ( PUBSTAGE , "final" ) ) AND ( LIMI…	Scopus	The root-colonizing endophyte Pirifomospora indica confers drought tolerance in Arabidopsis by stimulating the expression of drought stress-related genes in leaves	Sherameti et al., 2008: Sherameti, I., Tripathi, S., Varma, A., Oelmüller, R.	Piriformospora indica is an endophytic fungus that colonizes the roots of many plant species, including Arabidopsis. We exposed 18-day-old Arabidopsis seedlings, which were either cocultivated with the fungus or mock-treated for the last 9 days, to mild drought stress for 84 h. During the first 36 to 48 h, seedlings cocultivated with the fungus continued to grow, while the uncolonized controls di…	Rejected	no fold change of DREB2
ALL ( dreb2 AND "drought stress" ) AND ( LIMIT-TO ( DOCTYPE , "ar" ) ) AND ( LIMIT-TO ( LANGUAGE , "English" ) ) AND ( EXCLUDE ( SUBJAREA , "MEDI" ) OR EXCLUDE ( SUBJAREA , "NEUR" ) OR EXCLUDE ( SUBJAREA , "PHAR" ) OR EXCLUDE ( SUBJAREA , "VETE" ) OR EXCLUDE ( SUBJAREA , "PHYS" ) OR EXCLUDE ( SUBJAREA , "ECON" ) OR EXCLUDE ( SUBJAREA , "NURS" ) ) AND ( LIMIT-TO ( PUBSTAGE , "final" ) ) AND ( LIMI…	Scopus	Physio-biochemical assessment and CBF genes expression analysis in wheat under dehydration condition	Singh et al., 2022: Singh, K., Singh, S.P., Yadav, M.K.	Among all the cereals, wheat is an essential grain and food crop that provides a significant portion of the daily nutritional requirements for humans. To find the drought tolerant and drought sensitive genotypes, we employed fifty-three wheat genotypes, of which twenty-four genotypes were chosen based on physiological and biochemical criteria such as RWC, proline, and chlorophyll content. With th…	Rejected	no expression of DREB2
ALL ( dreb2 AND "drought stress" ) AND ( LIMIT-TO ( DOCTYPE , "ar" ) ) AND ( LIMIT-TO ( LANGUAGE , "English" ) ) AND ( EXCLUDE ( SUBJAREA , "MEDI" ) OR EXCLUDE ( SUBJAREA , "NEUR" ) OR EXCLUDE ( SUBJAREA , "PHAR" ) OR EXCLUDE ( SUBJAREA , "VETE" ) OR EXCLUDE ( SUBJAREA , "PHYS" ) OR EXCLUDE ( SUBJAREA , "ECON" ) OR EXCLUDE ( SUBJAREA , "NURS" ) ) AND ( LIMIT-TO ( PUBSTAGE , "final" ) ) AND ( LIMI…	Scopus	Genome-wide transcriptome analysis of soybean primary root under varying water-deficit conditions	Song et al., 2016: Song, L., Prince, S., Valliyodan, B., Joshi, T., Maldonado dos Santos, J.V., Wang, J., Lin, L., Wan, J., Wang, Y., Xu, D., Nguyen, H.T.	Soybean is a major crop that provides an important source of protein and oil to humans and animals, but its production can be dramatically decreased by the occurrence of drought stress. Soybeans can survive drought stress if there is a robust and deep root system at the early vegetative growth stage. However, little is known about the genome-wide molecular mechanisms contributing to soybean root …	Rejected	no expression of DREB2
ALL ( dreb2 AND "drought stress" ) AND ( LIMIT-TO ( DOCTYPE , "ar" ) ) AND ( LIMIT-TO ( LANGUAGE , "English" ) ) AND ( EXCLUDE ( SUBJAREA , "MEDI" ) OR EXCLUDE ( SUBJAREA , "NEUR" ) OR EXCLUDE ( SUBJAREA , "PHAR" ) OR EXCLUDE ( SUBJAREA , "VETE" ) OR EXCLUDE ( SUBJAREA , "PHYS" ) OR EXCLUDE ( SUBJAREA , "ECON" ) OR EXCLUDE ( SUBJAREA , "NURS" ) ) AND ( LIMIT-TO ( PUBSTAGE , "final" ) ) AND ( LIMI…	Scopus	Overexpression of DREB2C Delays Flowering in Arabidopsis thaliana via the Activation of FLC	Song et al., 2022: Song, C., Baek, J., Choe, U., Lim, C.O.	The timing of vegetative-to-reproductive phase transition changes under a variety of stresses. Here, we investigated the role of dehydration-responsive element-binding factor 2C (DREB2C), one of the high-temperature stress signaling transcription factors, in flowering in Arabidopsis thaliana. DREB2C-overexpressing Arabidopsis plants displayed delayed flowering relative to the wild type, and this …	Rejected	no drought stress
ALL ( dreb2 AND "drought stress" ) AND ( LIMIT-TO ( DOCTYPE , "ar" ) ) AND ( LIMIT-TO ( LANGUAGE , "English" ) ) AND ( EXCLUDE ( SUBJAREA , "MEDI" ) OR EXCLUDE ( SUBJAREA , "NEUR" ) OR EXCLUDE ( SUBJAREA , "PHAR" ) OR EXCLUDE ( SUBJAREA , "VETE" ) OR EXCLUDE ( SUBJAREA , "PHYS" ) OR EXCLUDE ( SUBJAREA , "ECON" ) OR EXCLUDE ( SUBJAREA , "NURS" ) ) AND ( LIMIT-TO ( PUBSTAGE , "final" ) ) AND ( LIMI…	Scopus	StATL2-like could affect growth and cold tolerance of plant by interacting with StCBFs	Song et al., 2022: Song, Q., Wang, X., Wu, F., Zhao, J., Liu, Y., Yang, X.	Key message: Our results confirmed that StATL2-like could interact with StCBFs and regulate plant growth. Meanwhile, StATL2-like acted as a negative regulator on low-temperature tolerance in plants. As important transcription factors for resisting many kinds of stresses, C-repeat-binding factors (CBF) play a key role in plant low-temperature tolerance by increasing COR genes expressions. Here, we…	Rejected	no expression of DREB2
ALL ( dreb2 AND "drought stress" ) AND ( LIMIT-TO ( DOCTYPE , "ar" ) ) AND ( LIMIT-TO ( LANGUAGE , "English" ) ) AND ( EXCLUDE ( SUBJAREA , "MEDI" ) OR EXCLUDE ( SUBJAREA , "NEUR" ) OR EXCLUDE ( SUBJAREA , "PHAR" ) OR EXCLUDE ( SUBJAREA , "VETE" ) OR EXCLUDE ( SUBJAREA , "PHYS" ) OR EXCLUDE ( SUBJAREA , "ECON" ) OR EXCLUDE ( SUBJAREA , "NURS" ) ) AND ( LIMIT-TO ( PUBSTAGE , "final" ) ) AND ( LIMI…	Scopus	Flower development under drought stress: Morphological and transcriptomic analyses reveal acute responses and long-term acclimation in Arabidopsis	Su et al., 2013: Su, Z., Ma, X., Guo, H., Sukiran, N.L., Guo, B., Assmann, S.M., Ma, H.	Drought dramatically affects plant growth and crop yield, but previous studies primarily examined responses to drought during vegetative development. Here, to study responses to drought during reproductive development, we grew Arabidopsis thaliana plants with limited water, under conditions that allowed the plants to initiate and complete reproduction. Drought treatment from just after the onset …	Rejected	no expression of DREB2
ALL ( dreb2 AND "drought stress" ) AND ( LIMIT-TO ( DOCTYPE , "ar" ) ) AND ( LIMIT-TO ( LANGUAGE , "English" ) ) AND ( EXCLUDE ( SUBJAREA , "MEDI" ) OR EXCLUDE ( SUBJAREA , "NEUR" ) OR EXCLUDE ( SUBJAREA , "PHAR" ) OR EXCLUDE ( SUBJAREA , "VETE" ) OR EXCLUDE ( SUBJAREA , "PHYS" ) OR EXCLUDE ( SUBJAREA , "ECON" ) OR EXCLUDE ( SUBJAREA , "NURS" ) ) AND ( LIMIT-TO ( PUBSTAGE , "final" ) ) AND ( LIMI…	Scopus	The soybean gene, GmMYBJ2, encodes a R2R3-type transcription factor involved in drought stress tolerance in Arabidopsis thaliana	Su et al., 2015: Su, L.-T., Wang, Y., Liu, D.-Q., Li, X.-W., Zhai, Y., Sun, X., Li, X.-Y., Liu, Y.-J., Li, J.-W., Wang, Q.-Y.	MYB genes are extensively distributed in higher plants and constitute one of the largest transcription factors (TFs) families. These TFs have been proved to be implicated in the regulation of plant growth, development, metabolism, and multiple abiotic stress responses. In the present study, a new soybean MYB gene, denoted GmMYBJ2, was isolated and its function was characterized. The GmMYBJ2 cDNA …	Rejected	no expression of DREB2 in correlation with dorught stress
ALL ( dreb2 AND "drought stress" ) AND ( LIMIT-TO ( DOCTYPE , "ar" ) ) AND ( LIMIT-TO ( LANGUAGE , "English" ) ) AND ( EXCLUDE ( SUBJAREA , "MEDI" ) OR EXCLUDE ( SUBJAREA , "NEUR" ) OR EXCLUDE ( SUBJAREA , "PHAR" ) OR EXCLUDE ( SUBJAREA , "VETE" ) OR EXCLUDE ( SUBJAREA , "PHYS" ) OR EXCLUDE ( SUBJAREA , "ECON" ) OR EXCLUDE ( SUBJAREA , "NURS" ) ) AND ( LIMIT-TO ( PUBSTAGE , "final" ) ) AND ( LIMI…	Scopus	A Nuclear Factor Y‐B Transcription Factor, GmNFYB17, Regulates Resistance to Drought Stress in Soybean	Sun et al., 2022: Sun, M., Li, Y., Zheng, J., Wu, D., Li, C., Li, Z., Zang, Z., Zhang, Y., Fang, Q., Li, W., Han, Y., Zhao, X., Li, Y.	Soybean is sensitive to drought stress, and increasing tolerance to drought stresses is an important target for improving the performance of soybean in the field. The genetic mechanisms underlying soybean’s drought tolerance remain largely unknown. Via a genome‐wide association study (GWAS) combined with linkage analysis, we identified 11 single‐nucleotide polymorphisms (SNPs) and 22 quantitative…	Rejected	no expression of DREB2
ALL ( dreb2 AND "drought stress" ) AND ( LIMIT-TO ( DOCTYPE , "ar" ) ) AND ( LIMIT-TO ( LANGUAGE , "English" ) ) AND ( EXCLUDE ( SUBJAREA , "MEDI" ) OR EXCLUDE ( SUBJAREA , "NEUR" ) OR EXCLUDE ( SUBJAREA , "PHAR" ) OR EXCLUDE ( SUBJAREA , "VETE" ) OR EXCLUDE ( SUBJAREA , "PHYS" ) OR EXCLUDE ( SUBJAREA , "ECON" ) OR EXCLUDE ( SUBJAREA , "NURS" ) ) AND ( LIMIT-TO ( PUBSTAGE , "final" ) ) AND ( LIMI…	Scopus	Cloning and overexpression of GmDREB2 gene from a vietnamese drought-resistant soybean variety	Tan et al., 2015: Tan, D.X., Tuong, H.M., Thuy, V.T.T., Van Son, L., Mau, C.H.	This work studied the amplification, cloning and determination of the GmDREB2 gene from the soybean cultivar DT2008 and five Vietnamese local soybean cultivars (DT26, DT51, DVN5, CB, CBD) and designed the vector carrying the structure containing GmDREB2 gene from cultivar DT2008 (best drought tolerant). The coding region of GmDREB2 gene isolated from six soybean cultivars was 480 nucleotides in l…	Rejected	no expression od DREB2
ALL ( dreb2 AND "drought stress" ) AND ( LIMIT-TO ( DOCTYPE , "ar" ) ) AND ( LIMIT-TO ( LANGUAGE , "English" ) ) AND ( EXCLUDE ( SUBJAREA , "MEDI" ) OR EXCLUDE ( SUBJAREA , "NEUR" ) OR EXCLUDE ( SUBJAREA , "PHAR" ) OR EXCLUDE ( SUBJAREA , "VETE" ) OR EXCLUDE ( SUBJAREA , "PHYS" ) OR EXCLUDE ( SUBJAREA , "ECON" ) OR EXCLUDE ( SUBJAREA , "NURS" ) ) AND ( LIMIT-TO ( PUBSTAGE , "final" ) ) AND ( LIMI…	Scopus	QTL analysis in multiple sorghum mapping populations facilitates dissection of the genetic control of agronomic and yield-related traits in sorghum [Sorghum bicolor (Moench)]	Techale et al., 2022: Techale, B., Dong, H., Mihrete, G., Aregash, G., Paterson, A.H., Kassahun, B.	The genetic architectures of agronomic and yield-related traits are expected to involve multiple loci that are unlikely all to segregate for alternative alleles in a single biparental population. Therefore, the identification of quantitative trait loci (QTL) that are expressed in diverse genetic backgrounds of multiple bi-parental populations provides evidence about both background-specific and c…	Rejected	no expression of DREB2
ALL ( dreb2 AND "drought stress" ) AND ( LIMIT-TO ( DOCTYPE , "ar" ) ) AND ( LIMIT-TO ( LANGUAGE , "English" ) ) AND ( EXCLUDE ( SUBJAREA , "MEDI" ) OR EXCLUDE ( SUBJAREA , "NEUR" ) OR EXCLUDE ( SUBJAREA , "PHAR" ) OR EXCLUDE ( SUBJAREA , "VETE" ) OR EXCLUDE ( SUBJAREA , "PHYS" ) OR EXCLUDE ( SUBJAREA , "ECON" ) OR EXCLUDE ( SUBJAREA , "NURS" ) ) AND ( LIMIT-TO ( PUBSTAGE , "final" ) ) AND ( LIMI…	Scopus	Drought stress tolerance and photosynthetic activity of alloplasmic lines t. Dicoccum x t. aestivum	Terletskaya et al., 2020: Terletskaya, N.V., Shcherban, A.B., Nesterov, M.A., Perfil’ev, R.N., Salina, E.A., Altayeva, N.A., Blavachinskaya, I.V.	Tetraploid species T. dicoccum Shuebl is a potential source of drought tolerance for cultivated wheat, including common wheat. This paper describes the genotyping of nine stable allolines isolated in the offspring from crossing of T. dicoccum x T. aestivum L. using 21 microsatellite (simple sequence repeats—SSR) markers and two cytoplasmic mitochondrial markers to orf256, rps19-p genes; evaluatio…	Rejected	no expression of DREB2
ALL ( dreb2 AND "drought stress" ) AND ( LIMIT-TO ( DOCTYPE , "ar" ) ) AND ( LIMIT-TO ( LANGUAGE , "English" ) ) AND ( EXCLUDE ( SUBJAREA , "MEDI" ) OR EXCLUDE ( SUBJAREA , "NEUR" ) OR EXCLUDE ( SUBJAREA , "PHAR" ) OR EXCLUDE ( SUBJAREA , "VETE" ) OR EXCLUDE ( SUBJAREA , "PHYS" ) OR EXCLUDE ( SUBJAREA , "ECON" ) OR EXCLUDE ( SUBJAREA , "NURS" ) ) AND ( LIMIT-TO ( PUBSTAGE , "final" ) ) AND ( LIMI…	Scopus	Subchronic Toxicity of GmDREB3 Gene Modified Wheat in the Third Generation Wistar Rats	Tian et al., 2022: Tian, J., Ke, X.-H., Yuan, Y., Yang, W.-X., Tang, X.-Q., Pei, L.-J., Fan, J., Zhuo, Q., Yang, X.-G., Liu, J.-F., Fan, B.-L.	The aim of the current study was to evaluate the subchronic toxicity of GmDREB3 gene modified wheat in the third generation rats. SPF Wistar rats were fed with transgenic wheat diet (Gm), parental wheat diet (Jimai22) and AIN-93 rodent diet (Control), respectively, for two generations, to produce the third generation rats which were used for this study. The selected fresh weaned offspring rats (2…	Rejected	no expression of DREB2
ALL ( dreb2 AND "drought stress" ) AND ( LIMIT-TO ( DOCTYPE , "ar" ) ) AND ( LIMIT-TO ( LANGUAGE , "English" ) ) AND ( EXCLUDE ( SUBJAREA , "MEDI" ) OR EXCLUDE ( SUBJAREA , "NEUR" ) OR EXCLUDE ( SUBJAREA , "PHAR" ) OR EXCLUDE ( SUBJAREA , "VETE" ) OR EXCLUDE ( SUBJAREA , "PHYS" ) OR EXCLUDE ( SUBJAREA , "ECON" ) OR EXCLUDE ( SUBJAREA , "NURS" ) ) AND ( LIMIT-TO ( PUBSTAGE , "final" ) ) AND ( LIMI…	Scopus	Seedling-stage salinity tolerance in rice: Decoding the role of transcription factors	Tiwari et al., 2022: Tiwari, S., Nutan, K.K., Deshmukh, R., Sarsu, F., Gupta, K.J., Singh, A.K., Singla-Pareek, S.L., Pareek, A.	Rice is an important staple food crop that feeds over half of the human population, particularly in developing countries. Increasing salinity is a major challenge for continuing rice production. Though rice is affected by salinity at all the developmental stages, it is most sensitive at the early seedling stage. The yield thus depends on how many seedlings can withstand saline water at the stage …	Rejected	no expression of DREB2
ALL ( dreb2 AND "drought stress" ) AND ( LIMIT-TO ( DOCTYPE , "ar" ) ) AND ( LIMIT-TO ( LANGUAGE , "English" ) ) AND ( EXCLUDE ( SUBJAREA , "MEDI" ) OR EXCLUDE ( SUBJAREA , "NEUR" ) OR EXCLUDE ( SUBJAREA , "PHAR" ) OR EXCLUDE ( SUBJAREA , "VETE" ) OR EXCLUDE ( SUBJAREA , "PHYS" ) OR EXCLUDE ( SUBJAREA , "ECON" ) OR EXCLUDE ( SUBJAREA , "NURS" ) ) AND ( LIMIT-TO ( PUBSTAGE , "final" ) ) AND ( LIMI…	Scopus	Mapping regulatory genes as candidates for cold and drought stress tolerance in barley	Tondelli et al., 2006: Tondelli, A., Francia, E., Barabaschi, D., Aprile, A., Skinner, J.S., Stockinger, E.J., Stanca, A.M., Pecchioni, N.	Cereal crop yield is greatly affected in many growing areas by abiotic stresses, mainly low temperature and drought. In order to find candidates for the tolerance genes for these stresses, 13 genes encoding for transcription factors and upstream regulators were screened by amplification and SSCP on six parental genotypes of three barley mapping populations ('Nure' x 'Tremois', 'Proctor' x 'Nudink…	Rejected	no expression of DREB2
ALL ( dreb2 AND "drought stress" ) AND ( LIMIT-TO ( DOCTYPE , "ar" ) ) AND ( LIMIT-TO ( LANGUAGE , "English" ) ) AND ( EXCLUDE ( SUBJAREA , "MEDI" ) OR EXCLUDE ( SUBJAREA , "NEUR" ) OR EXCLUDE ( SUBJAREA , "PHAR" ) OR EXCLUDE ( SUBJAREA , "VETE" ) OR EXCLUDE ( SUBJAREA , "PHYS" ) OR EXCLUDE ( SUBJAREA , "ECON" ) OR EXCLUDE ( SUBJAREA , "NURS" ) ) AND ( LIMIT-TO ( PUBSTAGE , "final" ) ) AND ( LIMI…	Scopus	Transcriptomic analysis of field-droughted sorghum from seedling to maturity reveals biotic and metabolic responses	Varoquaux et al., 2019: Varoquaux, N., Cole, B., Gao, C., Pierroz, G., Baker, C.R., Patel, D., Madera, M., Jeffers, T., Hollingsworth, J., Sievert, J., Yoshinaga, Y., Owiti, J.A., Singan, V.R., DeGraaf, S., Xu, L., Blow, M.J., Harrison, M.J., Visel, A., Jansson, C., Niyogi, K.K., Hutmacher, R., Coleman-Derr, D., O'Malley, R.C., Taylor, J.W., Dahlberg, J., Vogel, J.P., Lemaux, P.G., Purdom, E.	Drought is the most important environmental stress limiting crop yields. The C4 cereal sorghum [Sorghum bicolor (L.) Moench] is a critical food, forage, and emerging bioenergy crop that is notably drought-tolerant. We conducted a large-scale field experiment, imposing preflowering and postflowering drought stress on 2 genotypes of sorghum across a tightly resolved time series, from plant emergenc…	Rejected	no expression of DREB2
ALL ( dreb2 AND "drought stress" ) AND ( LIMIT-TO ( DOCTYPE , "ar" ) ) AND ( LIMIT-TO ( LANGUAGE , "English" ) ) AND ( EXCLUDE ( SUBJAREA , "MEDI" ) OR EXCLUDE ( SUBJAREA , "NEUR" ) OR EXCLUDE ( SUBJAREA , "PHAR" ) OR EXCLUDE ( SUBJAREA , "VETE" ) OR EXCLUDE ( SUBJAREA , "PHYS" ) OR EXCLUDE ( SUBJAREA , "ECON" ) OR EXCLUDE ( SUBJAREA , "NURS" ) ) AND ( LIMIT-TO ( PUBSTAGE , "final" ) ) AND ( LIMI…	Scopus	Norway spruce deploys tissue-specific responses during acclimation to cold	Vergara et al., 2022: Vergara, A., Haas, J.C., Aro, T., Stachula, P., Street, N.R., Hurry, V.	Climate change in the conifer-dominated boreal forest is expected to lead to warmer but more dynamic winter air temperatures, reducing the depth and duration of snow cover and lowering winter soil temperatures. To gain insight into the mechanisms that have enabled conifers to dominate extreme cold environments, we performed genome-wide RNA-Seq analysis from needles and roots of non-dormant two-ye…	Rejected	no expression of DREB2
ALL ( dreb2 AND "drought stress" ) AND ( LIMIT-TO ( DOCTYPE , "ar" ) ) AND ( LIMIT-TO ( LANGUAGE , "English" ) ) AND ( EXCLUDE ( SUBJAREA , "MEDI" ) OR EXCLUDE ( SUBJAREA , "NEUR" ) OR EXCLUDE ( SUBJAREA , "PHAR" ) OR EXCLUDE ( SUBJAREA , "VETE" ) OR EXCLUDE ( SUBJAREA , "PHYS" ) OR EXCLUDE ( SUBJAREA , "ECON" ) OR EXCLUDE ( SUBJAREA , "NURS" ) ) AND ( LIMIT-TO ( PUBSTAGE , "final" ) ) AND ( LIMI…	Scopus	CBF4/DREB1D represses XERICO to attenuate ABA, osmotic and drought stress responses in Arabidopsis	Vonapartis et al., 2022: Vonapartis, E., Mohamed, D., Li, J., Pan, W., Wu, J., Gazzarrini, S.	Water stress can severely impact plant growth, productivity and yield. Consequently, plants have evolved various strategies through which they can respond and adapt to their environment. XERICO (XER) is a stress-responsive RING E3 ubiquitin ligase that modulates abscisic acid (ABA) levels and promotes drought tolerance when overexpressed. To better understand the biological role of XER in stress …	Rejected	no expression of DREB2
ALL ( dreb2 AND "drought stress" ) AND ( LIMIT-TO ( DOCTYPE , "ar" ) ) AND ( LIMIT-TO ( LANGUAGE , "English" ) ) AND ( EXCLUDE ( SUBJAREA , "MEDI" ) OR EXCLUDE ( SUBJAREA , "NEUR" ) OR EXCLUDE ( SUBJAREA , "PHAR" ) OR EXCLUDE ( SUBJAREA , "VETE" ) OR EXCLUDE ( SUBJAREA , "PHYS" ) OR EXCLUDE ( SUBJAREA , "ECON" ) OR EXCLUDE ( SUBJAREA , "NURS" ) ) AND ( LIMIT-TO ( PUBSTAGE , "final" ) ) AND ( LIMI…	Scopus	Expression patterns of ERF genes underlying abiotic stresses in Di-haploid populus simonii × P. nigra	Wang et al., 2014: Wang, S., Yao, W., Wei, H., Jiang, T., Zhou, B.	176 ERF genes from Populus were identified by bioinformatics analysis, 13 of these in di-haploid Populus simonii × P. nigra were investigate by real-time RT-PCR, the results demonstrated that 13 ERF genes were highly responsive to salt stress, drought stress and ABA treatment, and all were expressed in root, stem, and leaf tissues, whereas their expression levels were markedly different in the va…	Rejected	no DREB2
ALL ( dreb2 AND "drought stress" ) AND ( LIMIT-TO ( DOCTYPE , "ar" ) ) AND ( LIMIT-TO ( LANGUAGE , "English" ) ) AND ( EXCLUDE ( SUBJAREA , "MEDI" ) OR EXCLUDE ( SUBJAREA , "NEUR" ) OR EXCLUDE ( SUBJAREA , "PHAR" ) OR EXCLUDE ( SUBJAREA , "VETE" ) OR EXCLUDE ( SUBJAREA , "PHYS" ) OR EXCLUDE ( SUBJAREA , "ECON" ) OR EXCLUDE ( SUBJAREA , "NURS" ) ) AND ( LIMIT-TO ( PUBSTAGE , "final" ) ) AND ( LIMI…	Scopus	Genome-Wide Identification of the AP2/ERF Gene Family and Functional Analysis of GmAP2/ERF144 for Drought Tolerance in Soybean	Wang et al., 2022: Wang, H., Ni, D., Shen, J., Deng, S., Xuan, H., Wang, C., Xu, J., Zhou, L., Guo, N., Zhao, J., Xing, H.	Drought is a major environmental constraint that causes substantial reductions in plant growth and yield. Expression of stress-related genes is largely regulated by transcription factors (TFs), including in soybean [Glycine max (L.) Merr.]. In this study, 301 GmAP2/ERF genes that encode TFs were identified in the soybean genome. The TFs were divided into five categories according to their homolog…	Rejected	no expression of DREB2
ALL ( dreb2 AND "drought stress" ) AND ( LIMIT-TO ( DOCTYPE , "ar" ) ) AND ( LIMIT-TO ( LANGUAGE , "English" ) ) AND ( EXCLUDE ( SUBJAREA , "MEDI" ) OR EXCLUDE ( SUBJAREA , "NEUR" ) OR EXCLUDE ( SUBJAREA , "PHAR" ) OR EXCLUDE ( SUBJAREA , "VETE" ) OR EXCLUDE ( SUBJAREA , "PHYS" ) OR EXCLUDE ( SUBJAREA , "ECON" ) OR EXCLUDE ( SUBJAREA , "NURS" ) ) AND ( LIMIT-TO ( PUBSTAGE , "final" ) ) AND ( LIMI…	Scopus	Salt and Drought Stress Tolerances in Transgenic Potatoes and Wild Species	Watanabe et al., 2011: Watanabe, K.N., Kikuchi, A., Shimazaki, T., Asahina, M.	Transgenic potatoes were employed to test whether a diverse range of gene actions can induce different stress tolerance(s). To select available transgenic lines, we measured growth profiles under non-stress conditions in our evaluation of transgenic lines and confirmed productivity under stress(es). We performed microarray analyses to clarify the abiotic stress tolerance mechanism controlled by A…	Rejected	no expression of DREB2
ALL ( dreb2 AND "drought stress" ) AND ( LIMIT-TO ( DOCTYPE , "ar" ) ) AND ( LIMIT-TO ( LANGUAGE , "English" ) ) AND ( EXCLUDE ( SUBJAREA , "MEDI" ) OR EXCLUDE ( SUBJAREA , "NEUR" ) OR EXCLUDE ( SUBJAREA , "PHAR" ) OR EXCLUDE ( SUBJAREA , "VETE" ) OR EXCLUDE ( SUBJAREA , "PHYS" ) OR EXCLUDE ( SUBJAREA , "ECON" ) OR EXCLUDE ( SUBJAREA , "NURS" ) ) AND ( LIMIT-TO ( PUBSTAGE , "final" ) ) AND ( LIMI…	Scopus	Accessions of Solanum tuberosum ssp. andigena show differences in photosynthetic recovery after drought stress as reflected in gene expression profiles	Watkinson et al., 2006: Watkinson, J.I., Hendricks, L., Sioson, A.A., Vasquez-Robinet, C., Stromberg, V., Heath, L.S., Schuler, M., Bohnert, H.J., Bonierbale, M., Grene, R.	A drought screen is described that identifies accessions of Solanum tuberosum ssp. andigena that show varying degrees of physiological acclimation or adaptation to repeated drought stress. VTSA01 shows adaptation, recovering photosynthesis after a first cycle and maintaining this ability upon subsequent stress exposure. VTSA03 shows acclimation, recovering photosynthesis only after a second cycle…	Rejected	no expression of DREB2
ALL ( dreb2 AND "drought stress" ) AND ( LIMIT-TO ( DOCTYPE , "ar" ) ) AND ( LIMIT-TO ( LANGUAGE , "English" ) ) AND ( EXCLUDE ( SUBJAREA , "MEDI" ) OR EXCLUDE ( SUBJAREA , "NEUR" ) OR EXCLUDE ( SUBJAREA , "PHAR" ) OR EXCLUDE ( SUBJAREA , "VETE" ) OR EXCLUDE ( SUBJAREA , "PHYS" ) OR EXCLUDE ( SUBJAREA , "ECON" ) OR EXCLUDE ( SUBJAREA , "NURS" ) ) AND ( LIMIT-TO ( PUBSTAGE , "final" ) ) AND ( LIMI…	Scopus	Identification of cassava alternative splicing-related genes and functional characterization of MeSCL30 involvement in drought stress	Weng et al., 2021: Weng, X., Zhou, X., Xie, S., Gu, J., Wang, Z.-Y.	Alternative splicing (AS) is an important post-transcriptional regulation strategy that can increase the proteome diversity and regulate mRNA level in eukaryote. Multi-exon genes can be alternative spliced to generate two or more transcripts, thereby increasing the adaptation to the external stress conditions in planta. However, AS-related proteins were less explored in cassava which is an import…	Rejected	no expression of DREB2
ALL ( dreb2 AND "drought stress" ) AND ( LIMIT-TO ( DOCTYPE , "ar" ) ) AND ( LIMIT-TO ( LANGUAGE , "English" ) ) AND ( EXCLUDE ( SUBJAREA , "MEDI" ) OR EXCLUDE ( SUBJAREA , "NEUR" ) OR EXCLUDE ( SUBJAREA , "PHAR" ) OR EXCLUDE ( SUBJAREA , "VETE" ) OR EXCLUDE ( SUBJAREA , "PHYS" ) OR EXCLUDE ( SUBJAREA , "ECON" ) OR EXCLUDE ( SUBJAREA , "NURS" ) ) AND ( LIMIT-TO ( PUBSTAGE , "final" ) ) AND ( LIMI…	Scopus	A canonical DREB2-type transcription factor in lily is post-translationally regulated and mediates heat stress response	Wu et al., 2018: Wu, Z., Liang, J., Zhang, S., Zhang, B., Zhao, Q., Li, G., Yang, X., Wang, C., He, J., Yi, M.	Based on studies of monocot crops and eudicot model plants, the DREB2 class of AP2-type transcription factor has been shown to play crucial roles in various abiotic stresses, especially in the upstream of the heat stress response; however, research on DREB2s has not been reported in non-gramineous monocot plants. Here, we identified a novel DREB2 (LlDREB2B) from lily (Lilium longiflorum), which w…	Rejected	no expression of DREB2
ALL ( dreb2 AND "drought stress" ) AND ( LIMIT-TO ( DOCTYPE , "ar" ) ) AND ( LIMIT-TO ( LANGUAGE , "English" ) ) AND ( EXCLUDE ( SUBJAREA , "MEDI" ) OR EXCLUDE ( SUBJAREA , "NEUR" ) OR EXCLUDE ( SUBJAREA , "PHAR" ) OR EXCLUDE ( SUBJAREA , "VETE" ) OR EXCLUDE ( SUBJAREA , "PHYS" ) OR EXCLUDE ( SUBJAREA , "ECON" ) OR EXCLUDE ( SUBJAREA , "NURS" ) ) AND ( LIMIT-TO ( PUBSTAGE , "final" ) ) AND ( LIMI…	Scopus	Identification of Genes Involved in the Responses of Tangor (C. reticulata × C. sinensis) to Drought Stress	Xiao et al., 2017: Xiao, J.-P., Zhang, L.-L., Zhang, H.-Q., Miao, L.-X.	Drought is the major abiotic stress with adverse effects on citrus, decreasing the agronomical yield and influencing the fruit quality. In this study, cDNA-amplified fragment length polymorphism (cDNA-AFLP) technique was used to investigate the transcriptional profile changes and identify drought-responsive genes in "Amakusa" tangor (C. reticulata × C. sinensis), a hybrid citrus sensitive to wate…	Rejected	no expression of DREB2
ALL ( dreb2 AND "drought stress" ) AND ( LIMIT-TO ( DOCTYPE , "ar" ) ) AND ( LIMIT-TO ( LANGUAGE , "English" ) ) AND ( EXCLUDE ( SUBJAREA , "MEDI" ) OR EXCLUDE ( SUBJAREA , "NEUR" ) OR EXCLUDE ( SUBJAREA , "PHAR" ) OR EXCLUDE ( SUBJAREA , "VETE" ) OR EXCLUDE ( SUBJAREA , "PHYS" ) OR EXCLUDE ( SUBJAREA , "ECON" ) OR EXCLUDE ( SUBJAREA , "NURS" ) ) AND ( LIMIT-TO ( PUBSTAGE , "final" ) ) AND ( LIMI…	Scopus	Identification of AP2/ERF transcription factors in Tetrastigma hemsleyanum revealed the specific roles of ERF46 under cold stress	Xie et al., 2022: Xie, Z., Yang, C., Liu, S., Li, M., Gu, L., Peng, X., Zhang, Z.	Tetrastigma hemsleyanum (T. hemsleyanum) is a traditional medicinal plant that is widely used in China. Cultivated T. hemsleyanum usually encounters cold stress, limiting its growth and quality at key developmental stages. APETALA2 (AP2)/ethylene-responsive factor (ERF) transcription factors (TFs) comprise one of the largest gene superfamilies in plants and are widely involved in biotic and abiot…	Rejected	no expression of DREB2
ALL ( dreb2 AND "drought stress" ) AND ( LIMIT-TO ( DOCTYPE , "ar" ) ) AND ( LIMIT-TO ( LANGUAGE , "English" ) ) AND ( EXCLUDE ( SUBJAREA , "MEDI" ) OR EXCLUDE ( SUBJAREA , "NEUR" ) OR EXCLUDE ( SUBJAREA , "PHAR" ) OR EXCLUDE ( SUBJAREA , "VETE" ) OR EXCLUDE ( SUBJAREA , "PHYS" ) OR EXCLUDE ( SUBJAREA , "ECON" ) OR EXCLUDE ( SUBJAREA , "NURS" ) ) AND ( LIMIT-TO ( PUBSTAGE , "final" ) ) AND ( LIMI…	Scopus	Natural variation in OsLG3 increases drought tolerance in rice by inducing ROS scavenging	Xiong et al., 2018: Xiong, H., Yu, J., Miao, J., Li, J., Zhang, H., Wang, X., Liu, P., Zhao, Y., Jiang, C., Yin, Z., Li, Y., Guo, Y., Fu, B., Wang, W., Li, Z., Ali, J., Li, Z.	Improving the performance of rice (Oryza sativa) under drought stress has the potential to significantly affect rice productivity. Here, we report that the ERF family transcription factor OsLG3 positively regulates drought tolerance in rice. In our previous work, we found that OsLG3 has a positive effect on rice grain length without affecting grain quality. In this study, we found that OsLG3 was …	Rejected
ALL ( dreb2 AND "drought stress" ) AND ( LIMIT-TO ( DOCTYPE , "ar" ) ) AND ( LIMIT-TO ( LANGUAGE , "English" ) ) AND ( EXCLUDE ( SUBJAREA , "MEDI" ) OR EXCLUDE ( SUBJAREA , "NEUR" ) OR EXCLUDE ( SUBJAREA , "PHAR" ) OR EXCLUDE ( SUBJAREA , "VETE" ) OR EXCLUDE ( SUBJAREA , "PHYS" ) OR EXCLUDE ( SUBJAREA , "ECON" ) OR EXCLUDE ( SUBJAREA , "NURS" ) ) AND ( LIMIT-TO ( PUBSTAGE , "final" ) ) AND ( LIMI…	Scopus	Improvement and transcriptome analysis of root architecture by overexpression of Fraxinus pennsylvanica DREB2A transcription factor in Robinia pseudoacacia L. 'Idaho'	Xiu et al., 2016: Xiu, Y., Iqbal, A., Zhu, C., Wu, G., Chang, Y., Li, N., Cao, Y., Zhang, W., Zeng, H., Chen, S., Wang, H.	Transcription factors play a key role to enable plants to cope with abiotic stresses. DREB2 regulates the expression of several stress-inducible genes and constitutes major hubs in the water stress signalling webs. We cloned and characterized a novel gene encoding the FpDREB2A transcription factor from Fraxinus pennsylvanica, and a yeast activity assay confirmed its DRE binding and transcription …	Rejected	Fraxinus pennsylvanica
ALL ( dreb2 AND "drought stress" ) AND ( LIMIT-TO ( DOCTYPE , "ar" ) ) AND ( LIMIT-TO ( LANGUAGE , "English" ) ) AND ( EXCLUDE ( SUBJAREA , "MEDI" ) OR EXCLUDE ( SUBJAREA , "NEUR" ) OR EXCLUDE ( SUBJAREA , "PHAR" ) OR EXCLUDE ( SUBJAREA , "VETE" ) OR EXCLUDE ( SUBJAREA , "PHYS" ) OR EXCLUDE ( SUBJAREA , "ECON" ) OR EXCLUDE ( SUBJAREA , "NURS" ) ) AND ( LIMIT-TO ( PUBSTAGE , "final" ) ) AND ( LIMI…	Scopus	Overexpression of MeDREB1D confers tolerance to both drought and cold stresses in transgenic Arabidopsis	Yang et al., 2016: Yang, Y., Liao, W., Yu, X., Wang, B., Peng, M., Ruan, M.	Cassava (Manihot esculenta) is an important tropical crop with extraordinary tolerance to drought stress but few reports on it. In this study, MeDREB1D was significantly and positively induced by drought stress. Two allelic variants of the gene named MeDREB1D(R-2) and MeDREB1D(Y-3) were identified. Overexpressing MeDREB1D(R-2) and MeDREB1D(Y-3) in Arabidopsis resulted in stronger tolerance to dro…	Rejected	no expression of DREB2
ALL ( dreb2 AND "drought stress" ) AND ( LIMIT-TO ( DOCTYPE , "ar" ) ) AND ( LIMIT-TO ( LANGUAGE , "English" ) ) AND ( EXCLUDE ( SUBJAREA , "MEDI" ) OR EXCLUDE ( SUBJAREA , "NEUR" ) OR EXCLUDE ( SUBJAREA , "PHAR" ) OR EXCLUDE ( SUBJAREA , "VETE" ) OR EXCLUDE ( SUBJAREA , "PHYS" ) OR EXCLUDE ( SUBJAREA , "ECON" ) OR EXCLUDE ( SUBJAREA , "NURS" ) ) AND ( LIMIT-TO ( PUBSTAGE , "final" ) ) AND ( LIMI…	Scopus	Temporal regulation of alternative splicing events in rice memory under drought stress	Yang et al., 2022: Yang, H., Li, P., Jin, G., Gui, D., Liu, L., Zhang, C.	Plant adaptation to drought stress is essential for plant survival and crop yield. Recently, harnessing drought memory, which is induced by repeated stress and recovery cycles, was suggested as a means to improve drought resistance at the transcriptional level. However, the genetic mechanism underlying drought memory is unclear. Here, we carried out a quantitative analysis of alternative splicing…	Rejected	no expression of DREB2
ALL ( dreb2 AND "drought stress" ) AND ( LIMIT-TO ( DOCTYPE , "ar" ) ) AND ( LIMIT-TO ( LANGUAGE , "English" ) ) AND ( EXCLUDE ( SUBJAREA , "MEDI" ) OR EXCLUDE ( SUBJAREA , "NEUR" ) OR EXCLUDE ( SUBJAREA , "PHAR" ) OR EXCLUDE ( SUBJAREA , "VETE" ) OR EXCLUDE ( SUBJAREA , "PHYS" ) OR EXCLUDE ( SUBJAREA , "ECON" ) OR EXCLUDE ( SUBJAREA , "NURS" ) ) AND ( LIMIT-TO ( PUBSTAGE , "final" ) ) AND ( LIMI…	Scopus	Identification of Key Drought Stress-Related Genes in the Hyacinth Bean	Yao et al., 2013: Yao, L.-M., Wang, B., Cheng, L.-J., Wu, T.-L.	Hyacinth bean (Lablab purpureus [Linn.] Sweet) possesses excellent characteristics for field production, but the response of this plant to drought stress has not been described at the molecular level. Suppression subtraction hybridization (SSH) is an effective way to exploit key factors for plant responses to drought stress that are involved in transcriptional and metabolic activities. In this st…	Rejected	no expression of DREB2
ALL ( dreb2 AND "drought stress" ) AND ( LIMIT-TO ( DOCTYPE , "ar" ) ) AND ( LIMIT-TO ( LANGUAGE , "English" ) ) AND ( EXCLUDE ( SUBJAREA , "MEDI" ) OR EXCLUDE ( SUBJAREA , "NEUR" ) OR EXCLUDE ( SUBJAREA , "PHAR" ) OR EXCLUDE ( SUBJAREA , "VETE" ) OR EXCLUDE ( SUBJAREA , "PHYS" ) OR EXCLUDE ( SUBJAREA , "ECON" ) OR EXCLUDE ( SUBJAREA , "NURS" ) ) AND ( LIMIT-TO ( PUBSTAGE , "final" ) ) AND ( LIMI…	Scopus	Time-series transcriptomics reveals a drought-responsive temporal network and crosstalk between drought stress and the circadian clock in foxtail millet	Yi et al., 2022: Yi, F., Huo, M., Li, J., Yu, J.	Drought stress is a serious factor affecting crop growth and production worldwide. The circadian clock has been identified as key to improving regional adaptability of plants. However, our understanding of the contribution of the circadian clock to drought response and the impacts of drought stress on the circadian clock in plants is still limited. To explore the interactions between the circadia…	Rejected	no expression of DREB2
ALL ( dreb2 AND "drought stress" ) AND ( LIMIT-TO ( DOCTYPE , "ar" ) ) AND ( LIMIT-TO ( LANGUAGE , "English" ) ) AND ( EXCLUDE ( SUBJAREA , "MEDI" ) OR EXCLUDE ( SUBJAREA , "NEUR" ) OR EXCLUDE ( SUBJAREA , "PHAR" ) OR EXCLUDE ( SUBJAREA , "VETE" ) OR EXCLUDE ( SUBJAREA , "PHYS" ) OR EXCLUDE ( SUBJAREA , "ECON" ) OR EXCLUDE ( SUBJAREA , "NURS" ) ) AND ( LIMIT-TO ( PUBSTAGE , "final" ) ) AND ( LIMI…	Scopus	AmDREB2C, from Ammopiptanthus mongolicus, enhances abiotic stress tolerance and regulates fatty acid composition in transgenic Arabidopsis	Yin et al., 2018: Yin, Y., Jiang, X., Ren, M., Xue, M., Nan, D., Wang, Z., Xing, Y., Wang, M.	Dehydration-responsive element-binding (DREB) transcription factors (TFs) play a vital role in plant response to abiotic stresses. However, little is known about DREB TFs in plants adapted to harsh environments and in the formation of polyunsaturated fatty acids (PUFAs), a major membrane component closely associated with plant stress tolerance. Here, we characterized AmDREB2C in Ammopiptanthus mo…	Rejected	no DREB2 expression
ALL ( dreb2 AND "drought stress" ) AND ( LIMIT-TO ( DOCTYPE , "ar" ) ) AND ( LIMIT-TO ( LANGUAGE , "English" ) ) AND ( EXCLUDE ( SUBJAREA , "MEDI" ) OR EXCLUDE ( SUBJAREA , "NEUR" ) OR EXCLUDE ( SUBJAREA , "PHAR" ) OR EXCLUDE ( SUBJAREA , "VETE" ) OR EXCLUDE ( SUBJAREA , "PHYS" ) OR EXCLUDE ( SUBJAREA , "ECON" ) OR EXCLUDE ( SUBJAREA , "NURS" ) ) AND ( LIMIT-TO ( PUBSTAGE , "final" ) ) AND ( LIMI…	Scopus	A chickpea stress-responsive NAC transcription factor, CarNAC5, confers enhanced tolerance to drought stress in transgenic Arabidopsis	Yu et al., 2016: Yu, X., Liu, Y., Wang, S., Tao, Y., Wang, Z., Mijiti, A., Wang, Z., Zhang, H., Ma, H.	Environmental stresses such as drought, salinity, and cold are major factors that significantly limit agricultural productivity. NAC is a plant-specific transcription factor family, which plays essential roles in response to various abiotic stresses. We have identified a novel NAC gene CarNAC5 from chickpea in a previous study, which was induced by drought stress. In the present study, the promot…	Rejected	no DREB2 expression in correlation with drought stress
ALL ( dreb2 AND "drought stress" ) AND ( LIMIT-TO ( DOCTYPE , "ar" ) ) AND ( LIMIT-TO ( LANGUAGE , "English" ) ) AND ( EXCLUDE ( SUBJAREA , "MEDI" ) OR EXCLUDE ( SUBJAREA , "NEUR" ) OR EXCLUDE ( SUBJAREA , "PHAR" ) OR EXCLUDE ( SUBJAREA , "VETE" ) OR EXCLUDE ( SUBJAREA , "PHYS" ) OR EXCLUDE ( SUBJAREA , "ECON" ) OR EXCLUDE ( SUBJAREA , "NURS" ) ) AND ( LIMIT-TO ( PUBSTAGE , "final" ) ) AND ( LIMI…	Scopus	Overexpression of the MYB37 transcription factor enhances abscisic acid sensitivity, and improves both drought tolerance and seed productivity in Arabidopsis thaliana	Yu et al., 2016: Yu, Y.-T., Wu, Z., Lu, K., Bi, C., Liang, S., Wang, X.-F., Zhang, D.-P.	Although a lot of genes have been revealed to participate in abscisic acid (ABA) signaling, many of the additional components involved in ABA signaling remain to be discovered. Here we report that overexpression of MYB37, a R2R3 MYB subgroup 14 transcription factor in Arabidopsis thaliana, confers hypersensitive phenotypes to exogenous ABA in all the major ABA responses, including ABA-induced inh…	Rejected	no DREB2 expression
ALL ( dreb2 AND "drought stress" ) AND ( LIMIT-TO ( DOCTYPE , "ar" ) ) AND ( LIMIT-TO ( LANGUAGE , "English" ) ) AND ( EXCLUDE ( SUBJAREA , "MEDI" ) OR EXCLUDE ( SUBJAREA , "NEUR" ) OR EXCLUDE ( SUBJAREA , "PHAR" ) OR EXCLUDE ( SUBJAREA , "VETE" ) OR EXCLUDE ( SUBJAREA , "PHYS" ) OR EXCLUDE ( SUBJAREA , "ECON" ) OR EXCLUDE ( SUBJAREA , "NURS" ) ) AND ( LIMIT-TO ( PUBSTAGE , "final" ) ) AND ( LIMI…	Scopus	A remorin gene SiREM6, the target gene of SiARDP, from foxtail millet (Setaria italica) promotes high salt tolerance in transgenic Arabidopsis	Yue et al., 2014: Yue, J., Li, C., Liu, Y., Yu, J.	Remorin proteins (REMs) form a plant-specific protein family, with some REMs being responsive to abiotic stress. However, the precise functions of REMs in abiotic stress tolerance are not clear. In this study, we identified 11 remorin genes from foxtail millet (Setaria italica) and cloned a remorin gene, SiREM6, for further investigation. The transcript level of SiREM6 was increased by high salt …	Rejected	no expression of DREB2
ALL ( dreb2 AND "drought stress" ) AND ( LIMIT-TO ( DOCTYPE , "ar" ) ) AND ( LIMIT-TO ( LANGUAGE , "English" ) ) AND ( EXCLUDE ( SUBJAREA , "MEDI" ) OR EXCLUDE ( SUBJAREA , "NEUR" ) OR EXCLUDE ( SUBJAREA , "PHAR" ) OR EXCLUDE ( SUBJAREA , "VETE" ) OR EXCLUDE ( SUBJAREA , "PHYS" ) OR EXCLUDE ( SUBJAREA , "ECON" ) OR EXCLUDE ( SUBJAREA , "NURS" ) ) AND ( LIMIT-TO ( PUBSTAGE , "final" ) ) AND ( LIMI…	Scopus	Analyzing the expression profile of AREB/ABF and DREB/CBF genes under drought and salinity stresses in grape (Vitis vinifera L.)	Zandkarimi et al., 2015: Zandkarimi, H., Ebadi, A., Salami, S.A., Alizade, H., Baisakh, N.	Expression patterns of four candidate AREB/ABF genes and four DREB/CBF genes were evaluated in leaf and root tissues of five grape varieties ('Qalati', 'Kaj Angoor', 'Sabz Angoor', 'Siahe Zarghan', 'Bidane Safid') with differential response to drought stress. Among the AREB/ABF genes, AREB1 and ABF2 showed up-regulation in response to drought stress in leaf and root tissues of all varieties while…	Rejected	no expression of DREB2
ALL ( dreb2 AND "drought stress" ) AND ( LIMIT-TO ( DOCTYPE , "ar" ) ) AND ( LIMIT-TO ( LANGUAGE , "English" ) ) AND ( EXCLUDE ( SUBJAREA , "MEDI" ) OR EXCLUDE ( SUBJAREA , "NEUR" ) OR EXCLUDE ( SUBJAREA , "PHAR" ) OR EXCLUDE ( SUBJAREA , "VETE" ) OR EXCLUDE ( SUBJAREA , "PHYS" ) OR EXCLUDE ( SUBJAREA , "ECON" ) OR EXCLUDE ( SUBJAREA , "NURS" ) ) AND ( LIMIT-TO ( PUBSTAGE , "final" ) ) AND ( LIMI…	Scopus	Variation in relative water content, proline accumulation and stress gene expression in two cowpea landraces under drought	Zegaoui et al., 2017: Zegaoui, Z., Planchais, S., Cabassa, C., Djebbar, R., Belbachir, O.A., Carol, P.	Many landraces of cowpea [Vigna unguiculata (L.) Walp.] are adapted to particular geographical and climatic conditions. Here we describe two landraces grown respectively in arid and temperate areas of Algeria and assess their physiological and molecular responses to drought stress. As expected, when deprived of water cowpea plants lose water over time with a gradual reduction in transpiration rat…	Rejected	no expression of DREB2
ALL ( dreb2 AND "drought stress" ) AND ( LIMIT-TO ( DOCTYPE , "ar" ) ) AND ( LIMIT-TO ( LANGUAGE , "English" ) ) AND ( EXCLUDE ( SUBJAREA , "MEDI" ) OR EXCLUDE ( SUBJAREA , "NEUR" ) OR EXCLUDE ( SUBJAREA , "PHAR" ) OR EXCLUDE ( SUBJAREA , "VETE" ) OR EXCLUDE ( SUBJAREA , "PHYS" ) OR EXCLUDE ( SUBJAREA , "ECON" ) OR EXCLUDE ( SUBJAREA , "NURS" ) ) AND ( LIMIT-TO ( PUBSTAGE , "final" ) ) AND ( LIMI…	Scopus	An R2R3 MYB transcription factor in wheat, TaPIMP1, mediates host resistance to Bipolaris sorokiniana and drought stresses through regulation of defense- and stress-related genes	Zhang et al., 2012: Zhang, Z., Liu, X., Wang, X., Zhou, M., Zhou, X., Ye, X., Wei, X.	In this study, we report new insights into the function of a wheat (Triticum aestivum) MYB gene TaPIMP1 through overexpression and underexpression, and its underlying mechanism in wheat. Electrophoretic mobility shift and yeast-one-hybrid assays indicated that TaPIMP1 can bind to five MYB-binding sites including ACI, and activate the expression of the genes with the cis-element, confirming that T…	Rejected	no expression of DREB2
ALL ( dreb2 AND "drought stress" ) AND ( LIMIT-TO ( DOCTYPE , "ar" ) ) AND ( LIMIT-TO ( LANGUAGE , "English" ) ) AND ( EXCLUDE ( SUBJAREA , "MEDI" ) OR EXCLUDE ( SUBJAREA , "NEUR" ) OR EXCLUDE ( SUBJAREA , "PHAR" ) OR EXCLUDE ( SUBJAREA , "VETE" ) OR EXCLUDE ( SUBJAREA , "PHYS" ) OR EXCLUDE ( SUBJAREA , "ECON" ) OR EXCLUDE ( SUBJAREA , "NURS" ) ) AND ( LIMIT-TO ( PUBSTAGE , "final" ) ) AND ( LIMI…	Scopus	Global reprogramming of transcription and metabolism in Medicago truncatula during progressive drought and after rewatering	Zhang et al., 2014: Zhang, J.-Y., Cruz De Carvalho, M.H., Torres-Jerez, I., Kang, Y., Allen, S.N., Huhman, D.V., Tang, Y., Murray, J., Sumner, L.W., Udvardi, M.K.	Medicago truncatula is a model legume forage crop native to the arid and semi-arid environments of the Mediterranean. Given its drought-adapted nature, it is an ideal candidate to study the molecular and biochemical mechanisms conferring drought resistance in plants. Medicago plants were subjected to a progressive drought stress over 14d of water withholding followed by rewatering under controlle…	Rejected	no expression of DREB2
ALL ( dreb2 AND "drought stress" ) AND ( LIMIT-TO ( DOCTYPE , "ar" ) ) AND ( LIMIT-TO ( LANGUAGE , "English" ) ) AND ( EXCLUDE ( SUBJAREA , "MEDI" ) OR EXCLUDE ( SUBJAREA , "NEUR" ) OR EXCLUDE ( SUBJAREA , "PHAR" ) OR EXCLUDE ( SUBJAREA , "VETE" ) OR EXCLUDE ( SUBJAREA , "PHYS" ) OR EXCLUDE ( SUBJAREA , "ECON" ) OR EXCLUDE ( SUBJAREA , "NURS" ) ) AND ( LIMIT-TO ( PUBSTAGE , "final" ) ) AND ( LIMI…	Scopus	Isolation and characterization of a buffalograss (Buchloe dactyloides) dehydration responsive element binding transcription factor, BdDREB2	Zhang et al., 2014: Zhang, P., Yang, P., Zhang, Z., Han, B., Wang, W., Wang, Y., Cao, Y., Hu, T.	Dehydration responsive element binding (DREB) transcription factors play an important role in the regulation of stress-related genes. These factors contribute to resistance to different abiotic stresses. In the present study, a novel DREB transcription factor, BdDREB2, isolated from Buchloe dactyloides, was cloned and characterized. The BdDREB2 protein was estimated to have a molecular weight of …	Rejected	no expression of DREB2
ALL ( dreb2 AND "drought stress" ) AND ( LIMIT-TO ( DOCTYPE , "ar" ) ) AND ( LIMIT-TO ( LANGUAGE , "English" ) ) AND ( EXCLUDE ( SUBJAREA , "MEDI" ) OR EXCLUDE ( SUBJAREA , "NEUR" ) OR EXCLUDE ( SUBJAREA , "PHAR" ) OR EXCLUDE ( SUBJAREA , "VETE" ) OR EXCLUDE ( SUBJAREA , "PHYS" ) OR EXCLUDE ( SUBJAREA , "ECON" ) OR EXCLUDE ( SUBJAREA , "NURS" ) ) AND ( LIMIT-TO ( PUBSTAGE , "final" ) ) AND ( LIMI…	Scopus	Global analysis of gene expression profiles in physic nut (Jatropha curcas L.) seedlings exposed to drought stress	Zhang et al., 2015: Zhang, C., Zhang, L., Zhang, S., Zhu, S., Wu, P., Chen, Y., Li, M., Jiang, H., Wu, G.	Physic nut (Jatropha curcas L.) is a small perennial tree or large shrub, which is well-adapted to semi-arid regions and is considered to have potential as a crop for biofuel production. It is now regarded as an excellent model for studying biofuel plants. However, our knowledge about the molecular responses of this species to drought stress is currently limited. Results: In this study, genome-wi…	Rejected	no expression of DREB2
ALL ( dreb2 AND "drought stress" ) AND ( LIMIT-TO ( DOCTYPE , "ar" ) ) AND ( LIMIT-TO ( LANGUAGE , "English" ) ) AND ( EXCLUDE ( SUBJAREA , "MEDI" ) OR EXCLUDE ( SUBJAREA , "NEUR" ) OR EXCLUDE ( SUBJAREA , "PHAR" ) OR EXCLUDE ( SUBJAREA , "VETE" ) OR EXCLUDE ( SUBJAREA , "PHYS" ) OR EXCLUDE ( SUBJAREA , "ECON" ) OR EXCLUDE ( SUBJAREA , "NURS" ) ) AND ( LIMIT-TO ( PUBSTAGE , "final" ) ) AND ( LIMI…	Scopus	Transcriptome dynamics of Camellia sinensis in response to continuous salinity and drought stress	Zhang et al., 2017: Zhang, Q., Cai, M., Yu, X., Wang, L., Guo, C., Ming, R., Zhang, J.	Camellia sinensis is an important economic crop worldwide since this plant is used to make one of the most popular non-alcoholic beverages, tea. Salinity together with drought pose a serious threat to the production and qualities of C. sinensis. However, the transcriptome dynamics occurring in response to drought stress and salt stress in tea plants are poorly understood at the molecular level. W…	Rejected	no expression of DREB2
ALL ( dreb2 AND "drought stress" ) AND ( LIMIT-TO ( DOCTYPE , "ar" ) ) AND ( LIMIT-TO ( LANGUAGE , "English" ) ) AND ( EXCLUDE ( SUBJAREA , "MEDI" ) OR EXCLUDE ( SUBJAREA , "NEUR" ) OR EXCLUDE ( SUBJAREA , "PHAR" ) OR EXCLUDE ( SUBJAREA , "VETE" ) OR EXCLUDE ( SUBJAREA , "PHYS" ) OR EXCLUDE ( SUBJAREA , "ECON" ) OR EXCLUDE ( SUBJAREA , "NURS" ) ) AND ( LIMIT-TO ( PUBSTAGE , "final" ) ) AND ( LIMI…	Scopus	A histone deacetylase, GhHDT4D, is positively involved in cotton response to drought stress	Zhang et al., 2020: Zhang, J.-B., He, S.-P., Luo, J.-W., Wang, X.-P., Li, D.-D., Li, X.-B.	Acetylation and deacetylation of histones are important for regulating a series of biological processes in plants. Histone deacetylases (HDACs) control the histone deacetylation that plays an important role in plant response to abiotic stress. In our study, we show the evidence that GhHDT4D (a member of the HD2 subfamily of HDACs) is involved in cotton (Gossypium hirsutum) response to drought str…	Rejected	silencing gene
ALL ( dreb2 AND "drought stress" ) AND ( LIMIT-TO ( DOCTYPE , "ar" ) ) AND ( LIMIT-TO ( LANGUAGE , "English" ) ) AND ( EXCLUDE ( SUBJAREA , "MEDI" ) OR EXCLUDE ( SUBJAREA , "NEUR" ) OR EXCLUDE ( SUBJAREA , "PHAR" ) OR EXCLUDE ( SUBJAREA , "VETE" ) OR EXCLUDE ( SUBJAREA , "PHYS" ) OR EXCLUDE ( SUBJAREA , "ECON" ) OR EXCLUDE ( SUBJAREA , "NURS" ) ) AND ( LIMIT-TO ( PUBSTAGE , "final" ) ) AND ( LIMI…	Scopus	Function Analysis of the ERF and DREB Subfamilies in Tomato Fruit Development and Ripening	Zhang et al., 2022: Zhang, L., Chen, L., Pang, S., Zheng, Q., Quan, S., Liu, Y., Xu, T., Liu, Y., Qi, M.	APETALA2/ethylene responsive factors (AP2/ERF) are unique regulators in the plant kingdom and are involved in the whole life activity processes such as development, ripening, and biotic and abiotic stresses. In tomato (Solanum lycopersicum), there are 140 AP2/ERF genes; however, their functionality remains poorly understood. In this work, the 14th and 19th amino acid differences in the AP2 domain…	Rejected	no DREB2
ALL ( dreb2 AND "drought stress" ) AND ( LIMIT-TO ( DOCTYPE , "ar" ) ) AND ( LIMIT-TO ( LANGUAGE , "English" ) ) AND ( EXCLUDE ( SUBJAREA , "MEDI" ) OR EXCLUDE ( SUBJAREA , "NEUR" ) OR EXCLUDE ( SUBJAREA , "PHAR" ) OR EXCLUDE ( SUBJAREA , "VETE" ) OR EXCLUDE ( SUBJAREA , "PHYS" ) OR EXCLUDE ( SUBJAREA , "ECON" ) OR EXCLUDE ( SUBJAREA , "NURS" ) ) AND ( LIMIT-TO ( PUBSTAGE , "final" ) ) AND ( LIMI…	Scopus	The AP2 transcription factor NtERF172 confers drought resistance by modifying NtCAT	Zhao et al., 2020: Zhao, Q., Hu, R.-S., Liu, D., Liu, X., Wang, J., Xiang, X.-H., Li, Y.-Y.	Drought stress often limits plant growth and global crop yields. Catalase (CAT)-mediated hydrogen peroxide (H2O2) scavenging plays an important role in the adaptation of plant stress responses, but the transcriptional regulation of the CAT gene in response to drought stress is not well understood. Here, we isolated an APETALA2/ETHYLENE-RESPONSIVE FACTOR (AP2/ERF) domain-containing transcription f…	Rejected	no expression of DREB2
ALL ( dreb2 AND "drought stress" ) AND ( LIMIT-TO ( DOCTYPE , "ar" ) ) AND ( LIMIT-TO ( LANGUAGE , "English" ) ) AND ( EXCLUDE ( SUBJAREA , "MEDI" ) OR EXCLUDE ( SUBJAREA , "NEUR" ) OR EXCLUDE ( SUBJAREA , "PHAR" ) OR EXCLUDE ( SUBJAREA , "VETE" ) OR EXCLUDE ( SUBJAREA , "PHYS" ) OR EXCLUDE ( SUBJAREA , "ECON" ) OR EXCLUDE ( SUBJAREA , "NURS" ) ) AND ( LIMIT-TO ( PUBSTAGE , "final" ) ) AND ( LIMI…	Scopus	CRISPR/Cas9 mediated gene-editing of GmHdz4 transcription factor enhances drought tolerance in soybean (Glycine max [L.] Merr.)	Zhong et al., 2022: Zhong, X., Hong, W., Shu, Y., Li, J., Liu, L., Chen, X., Islam, F., Zhou, W., Tang, G.	The HD-Zip transcription factors play a crucial role in plant development, secondary metabolism, and abiotic stress responses, but little is known about HD-Zip I genes in soybean. Here, a homeodomain-leucine zipper gene designated GmHdz4 was isolated. Chimeric soybean plants, GmHdz4 overexpressing (GmHdz4-oe), and gene-editing via CRISPR/Cas9 (gmhdz4) in hairy roots, were generated to examine the…	Rejected	no expression of DREB2
ALL ( dreb2 AND "drought stress" ) AND ( LIMIT-TO ( DOCTYPE , "ar" ) ) AND ( LIMIT-TO ( LANGUAGE , "English" ) ) AND ( EXCLUDE ( SUBJAREA , "MEDI" ) OR EXCLUDE ( SUBJAREA , "NEUR" ) OR EXCLUDE ( SUBJAREA , "PHAR" ) OR EXCLUDE ( SUBJAREA , "VETE" ) OR EXCLUDE ( SUBJAREA , "PHYS" ) OR EXCLUDE ( SUBJAREA , "ECON" ) OR EXCLUDE ( SUBJAREA , "NURS" ) ) AND ( LIMIT-TO ( PUBSTAGE , "final" ) ) AND ( LIMI…	Scopus	Overexpression of SpCBL6, a calcineurin B-like protein of Stipa purpurea, enhanced cold tolerance and reduced drought tolerance in transgenic Arabidopsis	Zhou et al., 2016: Zhou, Y., Cheng, Y., Yang, Y., Li, X., Supriyo, B., Sun, X., Yang, Y.	The purpose of the present study was to characterize SpCBL6 (GenBank accession number: KT780442) from Stipa purpurea and elucidate the function of this protein in abiotic stress. The full-length cDNA of SpCBL6 was isolated from S. purpurea by rapid amplification of cDNA ends methods. Laser confocal microscopy was used to analyze the subcellular localization of SpCBL6. The constructs of 35S:GFP-Sp…	Rejected	no DREB2 expression
ALL ( dreb2 AND "drought stress" ) AND ( LIMIT-TO ( DOCTYPE , "ar" ) ) AND ( LIMIT-TO ( LANGUAGE , "English" ) ) AND ( EXCLUDE ( SUBJAREA , "MEDI" ) OR EXCLUDE ( SUBJAREA , "NEUR" ) OR EXCLUDE ( SUBJAREA , "PHAR" ) OR EXCLUDE ( SUBJAREA , "VETE" ) OR EXCLUDE ( SUBJAREA , "PHYS" ) OR EXCLUDE ( SUBJAREA , "ECON" ) OR EXCLUDE ( SUBJAREA , "NURS" ) ) AND ( LIMIT-TO ( PUBSTAGE , "final" ) ) AND ( LIMI…	Scopus	Overexpression of soybean DREB1 enhances drought stress tolerance of transgenic wheat in the field	Zhou et al., 2020: Zhou, Y., Chen, M., Guo, J., Wang, Y., Min, D., Jiang, Q., Ji, H., Huang, C., Wei, W., Xu, H., Chen, X., Li, L., Xu, Z., Cheng, X., Wang, C., Wang, C., Ma, Y.	Drought-response-element binding (DREB)-like transcription factors can significantly enhance plant tolerance to water stress. However, most research on DREB-like proteins to date has been conducted in growth chambers or greenhouses, so there is very little evidence available to support their practical use in the field. In this study, we overexpressed GmDREB1 from soybean in two popular wheat vari…	Rejected	no DREB2 expression
ALL ( dreb2 AND "drought stress" ) AND ( LIMIT-TO ( DOCTYPE , "ar" ) ) AND ( LIMIT-TO ( LANGUAGE , "English" ) ) AND ( EXCLUDE ( SUBJAREA , "MEDI" ) OR EXCLUDE ( SUBJAREA , "NEUR" ) OR EXCLUDE ( SUBJAREA , "PHAR" ) OR EXCLUDE ( SUBJAREA , "VETE" ) OR EXCLUDE ( SUBJAREA , "PHYS" ) OR EXCLUDE ( SUBJAREA , "ECON" ) OR EXCLUDE ( SUBJAREA , "NURS" ) ) AND ( LIMIT-TO ( PUBSTAGE , "final" ) ) AND ( LIMI…	Scopus	Overexpression of ZmEREBP60 enhances drought tolerance in maize	Zhu et al., 2022: Zhu, Y., Liu, Y., Zhou, K., Tian, C., Aslam, M., Zhang, B., Liu, W., Zou, H.	Apetala2/ethylene response factor (AP2/ERF) family of transcription factors plays important roles in plant development and stress responses. However, few members of this family have been functionally and mechanistically characterised in maize. In this study, we characterised a member of the AP2/ERF transcription factor family, ZmEREBP60 from maize. Amino acid sequence alignment and phylogenetic a…	Rejected	no expression of DREB2
ALL ( dreb2 AND "drought stress" ) AND ( LIMIT-TO ( DOCTYPE , "ar" ) ) AND ( LIMIT-TO ( LANGUAGE , "English" ) ) AND ( EXCLUDE ( SUBJAREA , "MEDI" ) OR EXCLUDE ( SUBJAREA , "NEUR" ) OR EXCLUDE ( SUBJAREA , "PHAR" ) OR EXCLUDE ( SUBJAREA , "VETE" ) OR EXCLUDE ( SUBJAREA , "PHYS" ) OR EXCLUDE ( SUBJAREA , "ECON" ) OR EXCLUDE ( SUBJAREA , "NURS" ) ) AND ( LIMIT-TO ( PUBSTAGE , "final" ) ) AND ( LIMI…	Scopus	PpCBF3 from cold-tolerant Kentucky bluegrass involved in freezing tolerance associated with up-regulation of cold-related genes in transgenic Arabidopsis thaliana	Zhuang et al., 2015: Zhuang, L., Yuan, X., Chen, Y., Xu, B., Yang, Z., Huang, B.	Dehydration-Responsive Element Binding proteins (DREB)/C-repeat (CRT) Binding Factors (CBF) have been identified as transcriptional activators during plant responses to cold stress. The objective of this study was to determine the physiological roles of a CBF gene isolated from a cold-tolerant perennial grass species, Kentucky bluegrass (Poa pratensis L.), which designated as PpCBF3, in regulatin…	Rejected	no expression of DREB2
ALL ( dreb2 AND "drought stress" ) AND ( LIMIT-TO ( DOCTYPE , "ar" ) ) AND ( LIMIT-TO ( LANGUAGE , "English" ) ) AND ( EXCLUDE ( SUBJAREA , "MEDI" ) OR EXCLUDE ( SUBJAREA , "NEUR" ) OR EXCLUDE ( SUBJAREA , "PHAR" ) OR EXCLUDE ( SUBJAREA , "VETE" ) OR EXCLUDE ( SUBJAREA , "PHYS" ) OR EXCLUDE ( SUBJAREA , "ECON" ) OR EXCLUDE ( SUBJAREA , "NURS" ) ) AND ( LIMIT-TO ( PUBSTAGE , "final" ) ) AND ( LIMI…	Scopus	Transcriptome analysis reveals absence of unintended effects in drought-tolerant transgenic plants overexpressing the transcription factor ABF3	Abdeen et al., 2010: Abdeen, A., Schnell, J., Miki, B.	Plants engineered for abiotic stress tolerance may soon be commercialized. The engineering of these plants typically involves the manipulation of complex multigene networks and may therefore have a greater potential to introduce pleiotropic effects than the simple monogenic traits that currently dominate the plant biotechnology market. While research on unintended effects in transgenic plant syst…	Rejected	no DREB2 expression
ALL ( dreb2 AND "drought stress" ) AND ( LIMIT-TO ( DOCTYPE , "ar" ) ) AND ( LIMIT-TO ( LANGUAGE , "English" ) ) AND ( EXCLUDE ( SUBJAREA , "MEDI" ) OR EXCLUDE ( SUBJAREA , "NEUR" ) OR EXCLUDE ( SUBJAREA , "PHAR" ) OR EXCLUDE ( SUBJAREA , "VETE" ) OR EXCLUDE ( SUBJAREA , "PHYS" ) OR EXCLUDE ( SUBJAREA , "ECON" ) OR EXCLUDE ( SUBJAREA , "NURS" ) ) AND ( LIMIT-TO ( PUBSTAGE , "final" ) ) AND ( LIMI…	Scopus	Stress-inducible DREB2A transcription factor from Pennisetum glaucum is a phosphoprotein and its phosphorylation negatively regulates its DNA-binding activity	Agarwal et al., 2007: Agarwal, P., Agarwal, P.K., Nair, S., Sopory, S.K., Reddy, M.K.	Abiotic stress-mediated gene expression is regulated via different transcription factors of which drought-responsive element-binding (DREB) proteins play an important role. There are two types of DREBs. Presently, the function of DREB1 type protein is well studied; however, much less information is available for DREB2. In this study, a cDNA with an open reading frame of 332 amino acids, encoding …	Rejected	no DREB2 expression
ALL ( dreb2 AND "drought stress" ) AND ( LIMIT-TO ( DOCTYPE , "ar" ) ) AND ( LIMIT-TO ( LANGUAGE , "English" ) ) AND ( EXCLUDE ( SUBJAREA , "MEDI" ) OR EXCLUDE ( SUBJAREA , "NEUR" ) OR EXCLUDE ( SUBJAREA , "PHAR" ) OR EXCLUDE ( SUBJAREA , "VETE" ) OR EXCLUDE ( SUBJAREA , "PHYS" ) OR EXCLUDE ( SUBJAREA , "ECON" ) OR EXCLUDE ( SUBJAREA , "NURS" ) ) AND ( LIMIT-TO ( PUBSTAGE , "final" ) ) AND ( LIMI…	Scopus	QsMYB1 expression is modulated in response to heat and drought stresses and during plant recovery in Quercus suber	Almeida et al., 2013: Almeida, T., Pinto, G., Correia, B., Santos, C., Gonçalves, S.	Cork oak is an economically important forest species showing a great tolerance to high temperatures and shortage of water. However, the mechanisms underlying this plasticity are still poorly understood. Among the stress regulators, transcription factors (TFs) are especially important since they can control a wide range of stress-inducible genes, which make them powerful targets for genetic engine…	Rejected	no crop
ALL ( dreb2 AND "drought stress" ) AND ( LIMIT-TO ( DOCTYPE , "ar" ) ) AND ( LIMIT-TO ( LANGUAGE , "English" ) ) AND ( EXCLUDE ( SUBJAREA , "MEDI" ) OR EXCLUDE ( SUBJAREA , "NEUR" ) OR EXCLUDE ( SUBJAREA , "PHAR" ) OR EXCLUDE ( SUBJAREA , "VETE" ) OR EXCLUDE ( SUBJAREA , "PHYS" ) OR EXCLUDE ( SUBJAREA , "ECON" ) OR EXCLUDE ( SUBJAREA , "NURS" ) ) AND ( LIMIT-TO ( PUBSTAGE , "final" ) ) AND ( LIMI…	Scopus	Genome-wide identification and characterization of aquaporin gene family in common bean (Phaseolus vulgaris L.)	Ariani et al., 2015: Ariani, A., Gepts, P.	Plant aquaporins are a large and diverse family of water channel proteins that are essential for several physiological processes in living organisms. Numerous studies have linked plant aquaporins with a plethora of processes, such as nutrient acquisition, CO2 transport, plant growth and development, and response to abiotic stresses. However, little is known about this protein family in common bea…	Rejected	no DREB2 expression
ALL ( dreb2 AND "drought stress" ) AND ( LIMIT-TO ( DOCTYPE , "ar" ) ) AND ( LIMIT-TO ( LANGUAGE , "English" ) ) AND ( EXCLUDE ( SUBJAREA , "MEDI" ) OR EXCLUDE ( SUBJAREA , "NEUR" ) OR EXCLUDE ( SUBJAREA , "PHAR" ) OR EXCLUDE ( SUBJAREA , "VETE" ) OR EXCLUDE ( SUBJAREA , "PHYS" ) OR EXCLUDE ( SUBJAREA , "ECON" ) OR EXCLUDE ( SUBJAREA , "NURS" ) ) AND ( LIMIT-TO ( PUBSTAGE , "final" ) ) AND ( LIMI…	Scopus	Identification and characterization of genes responsive to drought and heat stress in rice (Oryza sativa L.)	Azameti et al., 2021: Azameti, M.K., Dauda, W.P., Panzade, K.P., Vishwakarma, H.	Rice is considered as a major source of food for most people worldwide. Global rice production is under threat as a result of adverse effects of heat and drought stress. It is therefore necessary to safeguard its sustainable production. This study was carried out to characterize differentially expressed genes (DEGs) under both drought and heat stresses in rice. 1001 DEGs were determined to show u…	Rejected	no expression of DREB2
ALL ( dreb2 AND "drought stress" ) AND ( LIMIT-TO ( DOCTYPE , "ar" ) ) AND ( LIMIT-TO ( LANGUAGE , "English" ) ) AND ( EXCLUDE ( SUBJAREA , "MEDI" ) OR EXCLUDE ( SUBJAREA , "NEUR" ) OR EXCLUDE ( SUBJAREA , "PHAR" ) OR EXCLUDE ( SUBJAREA , "VETE" ) OR EXCLUDE ( SUBJAREA , "PHYS" ) OR EXCLUDE ( SUBJAREA , "ECON" ) OR EXCLUDE ( SUBJAREA , "NURS" ) ) AND ( LIMIT-TO ( PUBSTAGE , "final" ) ) AND ( LIMI…	Scopus	Differential antioxidative responses in transgenic peanut bear no relationship to their superior transpiration efficiency under drought stress	Bhatnagar-Mathur et al., 2009: Bhatnagar-Mathur, P., Devi, M.J., Vadez, V., Sharma, K.K.	To counter the effects of environmental stresses, the plants must undergo detoxification that is crucial to avoid the accumulation of damaging free oxygen radicals (ROI). Here, we detail the oxidative damage, the antioxidant composition, and the osmoprotection achieved in transgenic plants of peanut overexpressing the AtDREB1A transgene, driven by a stress-inducible promoter (Atrd29A) when expose…	Rejected	no expression of DREB2
ALL ( dreb2 AND "drought stress" ) AND ( LIMIT-TO ( DOCTYPE , "ar" ) ) AND ( LIMIT-TO ( LANGUAGE , "English" ) ) AND ( EXCLUDE ( SUBJAREA , "MEDI" ) OR EXCLUDE ( SUBJAREA , "NEUR" ) OR EXCLUDE ( SUBJAREA , "PHAR" ) OR EXCLUDE ( SUBJAREA , "VETE" ) OR EXCLUDE ( SUBJAREA , "PHYS" ) OR EXCLUDE ( SUBJAREA , "ECON" ) OR EXCLUDE ( SUBJAREA , "NURS" ) ) AND ( LIMIT-TO ( PUBSTAGE , "final" ) ) AND ( LIMI…	Scopus	Transgenic peanut overexpressing the DREB1A transcription factor has higher yields under drought stress	Bhatnagar-Mathur et al., 2014: Bhatnagar-Mathur, P., Rao, J.S., Vadez, V., Dumbala, S.R., Rathore, A., Yamaguchi-Shinozaki, K., Sharma, K.K.	Transgenic research using the DREB group of transcription factors has received much attention in developing drought-tolerant and climate-ready varieties of crop plants. While many reports have demonstrated increased tolerance to water deficits under laboratory and greenhouse conditions, only a few have tested possible effects under field conditions, with limited success in most cases. Here, we pr…	Rejected	DREB1
ALL ( dreb2 AND "drought stress" ) AND ( LIMIT-TO ( DOCTYPE , "ar" ) ) AND ( LIMIT-TO ( LANGUAGE , "English" ) ) AND ( EXCLUDE ( SUBJAREA , "MEDI" ) OR EXCLUDE ( SUBJAREA , "NEUR" ) OR EXCLUDE ( SUBJAREA , "PHAR" ) OR EXCLUDE ( SUBJAREA , "VETE" ) OR EXCLUDE ( SUBJAREA , "PHYS" ) OR EXCLUDE ( SUBJAREA , "ECON" ) OR EXCLUDE ( SUBJAREA , "NURS" ) ) AND ( LIMIT-TO ( PUBSTAGE , "final" ) ) AND ( LIMI…	Scopus	Transgenic expression of sorghum DREB2 in rice improves tolerance and yield under water limitation	Bihani et al., 2011: Bihani, P., Char, B., Bhargava, S.	Plant-specific transcription factors belonging to the dehydration response element binding (DREB)/C-repeat binding factor (CBF) subfamily of the AP2/EREBP family specifically interact with dehydration-responsive elements (DRE)/C-repeat (CRT) and control the expression of many stress-inducible genes in plants. Two major subgroups of DREB proteins are represented by DREB1 and DREB2, which are induc…	Rejected	no fold change of DREB2
ALL ( dreb2 AND "drought stress" ) AND ( LIMIT-TO ( DOCTYPE , "ar" ) ) AND ( LIMIT-TO ( LANGUAGE , "English" ) ) AND ( EXCLUDE ( SUBJAREA , "MEDI" ) OR EXCLUDE ( SUBJAREA , "NEUR" ) OR EXCLUDE ( SUBJAREA , "PHAR" ) OR EXCLUDE ( SUBJAREA , "VETE" ) OR EXCLUDE ( SUBJAREA , "PHYS" ) OR EXCLUDE ( SUBJAREA , "ECON" ) OR EXCLUDE ( SUBJAREA , "NURS" ) ) AND ( LIMIT-TO ( PUBSTAGE , "final" ) ) AND ( LIMI…	Scopus	Identification and functional characterization of ten AP2/ERF genes in potato	Bouaziz et al., 2015: Bouaziz, D., Charfeddine, M., Jbir, R., Saidi, M.N., Pirrello, J., Charfeddine, S., Bouzayen, M., Gargouri-Bouzid, R.	Ethylene-responsive element-binding factors (ERF) constitute one of the largest transcription factor families in plants. In this study, we describe the cloning and the characterization of ten cDNAs encoding ERF factors from potato. The alignment of their AP2/ERF (Apetala2/ethylene-responsive factor) domain led to the identification of six StERFs (Solanum tuberosum ERFs) and four StDREBs (dehydrat…	Rejected	no fold change of DREB2
ALL ( dreb2 AND "drought stress" ) AND ( LIMIT-TO ( DOCTYPE , "ar" ) ) AND ( LIMIT-TO ( LANGUAGE , "English" ) ) AND ( EXCLUDE ( SUBJAREA , "MEDI" ) OR EXCLUDE ( SUBJAREA , "NEUR" ) OR EXCLUDE ( SUBJAREA , "PHAR" ) OR EXCLUDE ( SUBJAREA , "VETE" ) OR EXCLUDE ( SUBJAREA , "PHYS" ) OR EXCLUDE ( SUBJAREA , "ECON" ) OR EXCLUDE ( SUBJAREA , "NURS" ) ) AND ( LIMIT-TO ( PUBSTAGE , "final" ) ) AND ( LIMI…	Scopus	Maize ZmbZIP33 Is Involved in Drought Resistance and Recovery Ability Through an Abscisic Acid-Dependent Signaling Pathway	Cao et al., 2021: Cao, L., Lu, X., Wang, G., Zhang, Q., Zhang, X., Fan, Z., Cao, Y., Wei, L., Wang, T., Wang, Z.	Analyzing the transcriptome of maize leaves under drought stress and rewatering conditions revealed that transcription factors were involved in this process, among which ZmbZIP33 of the ABSCISIC ACID-INSENSITIVE 5-like protein 5 family was induced to significantly up-regulated. The functional mechanism of ZmbZIP33 in Abscisic acd (ABA) signaling pathway and its response to drought stress and rewa…	Rejected	no expression of DREB2
ALL ( dreb2 AND "drought stress" ) AND ( LIMIT-TO ( DOCTYPE , "ar" ) ) AND ( LIMIT-TO ( LANGUAGE , "English" ) ) AND ( EXCLUDE ( SUBJAREA , "MEDI" ) OR EXCLUDE ( SUBJAREA , "NEUR" ) OR EXCLUDE ( SUBJAREA , "PHAR" ) OR EXCLUDE ( SUBJAREA , "VETE" ) OR EXCLUDE ( SUBJAREA , "PHYS" ) OR EXCLUDE ( SUBJAREA , "ECON" ) OR EXCLUDE ( SUBJAREA , "NURS" ) ) AND ( LIMIT-TO ( PUBSTAGE , "final" ) ) AND ( LIMI…	Scopus	Identification of Candidate Genes Regulating Drought Tolerance in Pearl Millet	Chakraborty et al., 2022: Chakraborty, A., Viswanath, A., Malipatil, R., Semalaiyappan, J., Shah, P., Ronanki, S., Rathore, A., Singh, S.P., Govindaraj, M., Tonapi, V.A., Thirunavukkarasu, N.	Pearl millet is an important crop of the arid and semi-arid ecologies to sustain food and fodder production. The greater tolerance to drought stress attracts us to examine its cellular and molecular mechanisms via functional genomics approaches to augment the grain yield. Here, we studied the drought response of 48 inbreds representing four different maturity groups at the flowering stage. A set …	Rejected	no fold change of DREB2
ALL ( dreb2 AND "drought stress" ) AND ( LIMIT-TO ( DOCTYPE , "ar" ) ) AND ( LIMIT-TO ( LANGUAGE , "English" ) ) AND ( EXCLUDE ( SUBJAREA , "MEDI" ) OR EXCLUDE ( SUBJAREA , "NEUR" ) OR EXCLUDE ( SUBJAREA , "PHAR" ) OR EXCLUDE ( SUBJAREA , "VETE" ) OR EXCLUDE ( SUBJAREA , "PHYS" ) OR EXCLUDE ( SUBJAREA , "ECON" ) OR EXCLUDE ( SUBJAREA , "NURS" ) ) AND ( LIMIT-TO ( PUBSTAGE , "final" ) ) AND ( LIMI…	Scopus	Relative contribution of different members of OsDREB gene family to osmotic stress tolerance in indica and japonica ecotypes of rice	Chakraborty et al., 2022: Chakraborty, K., Jena, P., Mondal, S., Dash, G.K., Ray, S., Baig, M.J., Swain, P.	Drought/osmotic stress is the single largest production constraint in rain-fed rice cultivation. Different members of the DREB gene family are known to contribute to osmotic stress tolerance. In this study, an attempt was made to understand their relative contribution towards osmotic stress tolerance in indica and japonica ecotypes of rice. Two genotypes (one tolerant and one susceptible) from ea…	Rejected	no DREB2 expression
ALL ( dreb2 AND "drought stress" ) AND ( LIMIT-TO ( DOCTYPE , "ar" ) ) AND ( LIMIT-TO ( LANGUAGE , "English" ) ) AND ( EXCLUDE ( SUBJAREA , "MEDI" ) OR EXCLUDE ( SUBJAREA , "NEUR" ) OR EXCLUDE ( SUBJAREA , "PHAR" ) OR EXCLUDE ( SUBJAREA , "VETE" ) OR EXCLUDE ( SUBJAREA , "PHYS" ) OR EXCLUDE ( SUBJAREA , "ECON" ) OR EXCLUDE ( SUBJAREA , "NURS" ) ) AND ( LIMIT-TO ( PUBSTAGE , "final" ) ) AND ( LIMI…	Scopus	Isolation, characterization and expression of transcription factor ScDREB2 from wild, commercial and interspecific hybrid sugarcane in salinity condition	Chanprame et al., 2019: Chanprame, S., Promkhlibnil, T., Suwanno, S., Laksana, C.	Dehydration Responsive Element Binding (DREB) gene is one of the essential transcription factors plants use for responding to stress conditions including salinity, drought, and cold stress. The purpose of this study was to isolate the full length and characterize the DREB gene from three different genotypes of sugarcane, wild, commercial cultivar, and interspecific hybrid sugarcane. The length of…	Rejected	salinity stress
ALL ( dreb2 AND "drought stress" ) AND ( LIMIT-TO ( DOCTYPE , "ar" ) ) AND ( LIMIT-TO ( LANGUAGE , "English" ) ) AND ( EXCLUDE ( SUBJAREA , "MEDI" ) OR EXCLUDE ( SUBJAREA , "NEUR" ) OR EXCLUDE ( SUBJAREA , "PHAR" ) OR EXCLUDE ( SUBJAREA , "VETE" ) OR EXCLUDE ( SUBJAREA , "PHYS" ) OR EXCLUDE ( SUBJAREA , "ECON" ) OR EXCLUDE ( SUBJAREA , "NURS" ) ) AND ( LIMIT-TO ( PUBSTAGE , "final" ) ) AND ( LIMI…	Scopus	Expression profiling and functional characterization of a DREB2-type gene from Populus euphratica	Chen et al., 2009: Chen, J., Xia, X., Yin, W.	A novel DREB (dehydration responsive element binding) gene, designated PeDREB2, was isolated from the desert-grown tree, Populus euphratica. Based on multiple sequence alignment and phylogenetic characterization, PeDREB2 was classified as an A-2 group member of the DREB family. Expression of PeDREB2 was induced by cold, drought, and high salinity, but not by abscisic acid (ABA) treatment. PeDREB2…	Rejected	Populus euphratica
ALL ( dreb2 AND "drought stress" ) AND ( LIMIT-TO ( DOCTYPE , "ar" ) ) AND ( LIMIT-TO ( LANGUAGE , "English" ) ) AND ( EXCLUDE ( SUBJAREA , "MEDI" ) OR EXCLUDE ( SUBJAREA , "NEUR" ) OR EXCLUDE ( SUBJAREA , "PHAR" ) OR EXCLUDE ( SUBJAREA , "VETE" ) OR EXCLUDE ( SUBJAREA , "PHYS" ) OR EXCLUDE ( SUBJAREA , "ECON" ) OR EXCLUDE ( SUBJAREA , "NURS" ) ) AND ( LIMIT-TO ( PUBSTAGE , "final" ) ) AND ( LIMI…	Scopus	Arabidopsis RGLG2, functioning as a RING E3 ligase, interacts with AtERF53 and negatively regulates the plant drought stress response	Cheng et al., 2012: Cheng, M.-C., Hsieh, E.-J., Chen, J.-H., Chen, H.-Y., Lin, T.-P.	Transcriptional activities of plants play important roles in responses to environmental stresses. ETHYLENE RESPONSE FACTOR53 (AtERF53) is a drought-induced transcription factor that belongs to the AP2/ERF superfamily and has a highly conserved AP2 domain. It can regulate drought-responsive gene expression by binding to the GCC box and/or the dehydration-responsive element in the promoter of downs…	Rejected	no fold change of DREB2
ALL ( dreb2 AND "drought stress" ) AND ( LIMIT-TO ( DOCTYPE , "ar" ) ) AND ( LIMIT-TO ( LANGUAGE , "English" ) ) AND ( EXCLUDE ( SUBJAREA , "MEDI" ) OR EXCLUDE ( SUBJAREA , "NEUR" ) OR EXCLUDE ( SUBJAREA , "PHAR" ) OR EXCLUDE ( SUBJAREA , "VETE" ) OR EXCLUDE ( SUBJAREA , "PHYS" ) OR EXCLUDE ( SUBJAREA , "ECON" ) OR EXCLUDE ( SUBJAREA , "NURS" ) ) AND ( LIMIT-TO ( PUBSTAGE , "final" ) ) AND ( LIMI…	Scopus	Overexpression of a Hevea brasiliensis ErbB-3 binding protein 1 gene increases drought tolerance and organ size in Arabidopsis	Cheng et al., 2016: Cheng, H., Chen, X., Zhu, J., Huang, H.	Rubber trees are economically important tropical tree species and the major source of natural rubber, which is an essential industrial material. This tropical perennial tree is susceptible to cold stress and other abiotic stresses, especially in the marginal northern tropics. Recent years, the genome sequencing and RNA-seq projects produced huge amount of sequence data, which greatly facilitated …	Rejected	no fold change of DREB2
ALL ( dreb2 AND "drought stress" ) AND ( LIMIT-TO ( DOCTYPE , "ar" ) ) AND ( LIMIT-TO ( LANGUAGE , "English" ) ) AND ( EXCLUDE ( SUBJAREA , "MEDI" ) OR EXCLUDE ( SUBJAREA , "NEUR" ) OR EXCLUDE ( SUBJAREA , "PHAR" ) OR EXCLUDE ( SUBJAREA , "VETE" ) OR EXCLUDE ( SUBJAREA , "PHYS" ) OR EXCLUDE ( SUBJAREA , "ECON" ) OR EXCLUDE ( SUBJAREA , "NURS" ) ) AND ( LIMIT-TO ( PUBSTAGE , "final" ) ) AND ( LIMI…	Scopus	Constitutive overexpression of the calcium sensor CBL5 confers osmotic or drought stress tolerance in Arabidopsis	Cheong et al., 2010: Cheong, Y.H., Sung, S.J., Kim, B.-G., Pandey, G.K., Cho, J.-S., Kim, K.-N., Luan, S.	Calcium serves as a critical messenger in many adaptation and developmental processes. Cellular calcium signals are detected and transmitted by sensor molecules such as calcium-binding proteins. In plants, the calcineurin B-like protein (CBL) family represents a unique group of calcium sensors and plays a key role in decoding calcium transients by specifically interacting with and regulating a fa…	Rejected	no DREB2 expression
ALL ( dreb2 AND "drought stress" ) AND ( LIMIT-TO ( DOCTYPE , "ar" ) ) AND ( LIMIT-TO ( LANGUAGE , "English" ) ) AND ( EXCLUDE ( SUBJAREA , "MEDI" ) OR EXCLUDE ( SUBJAREA , "NEUR" ) OR EXCLUDE ( SUBJAREA , "PHAR" ) OR EXCLUDE ( SUBJAREA , "VETE" ) OR EXCLUDE ( SUBJAREA , "PHYS" ) OR EXCLUDE ( SUBJAREA , "ECON" ) OR EXCLUDE ( SUBJAREA , "NURS" ) ) AND ( LIMIT-TO ( PUBSTAGE , "final" ) ) AND ( LIMI…	Scopus	An overview of recent advancement in phytohormones-mediated stress management and drought tolerance in crop plants	Chhaya et al.,2021: Chhaya, Yadav, B., Jogawat, A., Gnanasekaran, P., Kumari, P., Lakra, N., Lal, S.K., Pawar, J., Narayan, O.P.	Plants face a continuous threat of abiotic stresses under the changing environment. Because of climate change, water scarcity has been shown to be a significant environmental constraint on plant productivity. Droughts in particular have been shown to affect plant growth and development, lead to alteration in quality and quantity of crop production, and result in global food insecurity. Phytohormo…	Rejected	review	utile per le immagini
ALL ( dreb2 AND "drought stress" ) AND ( LIMIT-TO ( DOCTYPE , "ar" ) ) AND ( LIMIT-TO ( LANGUAGE , "English" ) ) AND ( EXCLUDE ( SUBJAREA , "MEDI" ) OR EXCLUDE ( SUBJAREA , "NEUR" ) OR EXCLUDE ( SUBJAREA , "PHAR" ) OR EXCLUDE ( SUBJAREA , "VETE" ) OR EXCLUDE ( SUBJAREA , "PHYS" ) OR EXCLUDE ( SUBJAREA , "ECON" ) OR EXCLUDE ( SUBJAREA , "NURS" ) ) AND ( LIMIT-TO ( PUBSTAGE , "final" ) ) AND ( LIMI…	Scopus	Transcriptional profiling in pearl millet (Pennisetum glaucum L.R. Br.) for identification of differentially expressed drought responsive genes	Choudhary et al., 2015: Choudhary, M., Jayanand, Padaria, J.C.	Pearl millet (Pennisetum glaucum) is an important cereal of traditional farming systems that has the natural ability to withstand various abiotic stresses. The present study aims at the identification and validation of major differentially expressed genes in response to drought stress in P. glaucum by Suppression Subtractive Hybridization (SSH) analysis. Twenty-two days old seedlings of P. glaucu…	Rejected	no expression of DREB2
ALL ( dreb2 AND "drought stress" ) AND ( LIMIT-TO ( DOCTYPE , "ar" ) ) AND ( LIMIT-TO ( LANGUAGE , "English" ) ) AND ( EXCLUDE ( SUBJAREA , "MEDI" ) OR EXCLUDE ( SUBJAREA , "NEUR" ) OR EXCLUDE ( SUBJAREA , "PHAR" ) OR EXCLUDE ( SUBJAREA , "VETE" ) OR EXCLUDE ( SUBJAREA , "PHYS" ) OR EXCLUDE ( SUBJAREA , "ECON" ) OR EXCLUDE ( SUBJAREA , "NURS" ) ) AND ( LIMIT-TO ( PUBSTAGE , "final" ) ) AND ( LIMI…	Scopus	Drought Tolerance in Wild Plant Populations: The Case of Common Beans (Phaseolus vulgaris L.)	Cortés et al., 2013: Cortés, A.J., Monserrate, F.A., Ramírez-Villegas, J., Madriñán, S., Blair, M.W.	Reliable estimations of drought tolerance in wild plant populations have proved to be challenging and more accessible alternatives are desirable. With that in mind, an ecological diversity study was conducted based on the geographical origin of 104 wild common bean accessions to estimate drought tolerance in their natural habitats. Our wild population sample covered a range of mesic to very dry h…	Rejected	no expression of DREB2
ALL ( dreb2 AND "drought stress" ) AND ( LIMIT-TO ( DOCTYPE , "ar" ) ) AND ( LIMIT-TO ( LANGUAGE , "English" ) ) AND ( EXCLUDE ( SUBJAREA , "MEDI" ) OR EXCLUDE ( SUBJAREA , "NEUR" ) OR EXCLUDE ( SUBJAREA , "PHAR" ) OR EXCLUDE ( SUBJAREA , "VETE" ) OR EXCLUDE ( SUBJAREA , "PHYS" ) OR EXCLUDE ( SUBJAREA , "ECON" ) OR EXCLUDE ( SUBJAREA , "NURS" ) ) AND ( LIMIT-TO ( PUBSTAGE , "final" ) ) AND ( LIMI…	Scopus	Nucleotide diversity patterns at the drought-related DREB2 encoding genes in wild and cultivated common bean (Phaseolus vulgaris L.)	Cortés et al., 2014: Cortés, A.J., This, D., Chavarro, C., Madriñán, S., Blair, M.W.	Common beans are an important food legume faced with a series of abiotic stresses the most severe of which is drought. The crop is interesting as a model for the analysis of gene phylogenies due to its domestication process, race structure, and origins in a group of wild common beans found along the South American Andes and the region of Mesoamerica. Meanwhile, the DREB2 transcription factors hav…	Rejected	no DREB2 expression
ALL ( dreb2 AND "drought stress" ) AND ( LIMIT-TO ( DOCTYPE , "ar" ) ) AND ( LIMIT-TO ( LANGUAGE , "English" ) ) AND ( EXCLUDE ( SUBJAREA , "MEDI" ) OR EXCLUDE ( SUBJAREA , "NEUR" ) OR EXCLUDE ( SUBJAREA , "PHAR" ) OR EXCLUDE ( SUBJAREA , "VETE" ) OR EXCLUDE ( SUBJAREA , "PHYS" ) OR EXCLUDE ( SUBJAREA , "ECON" ) OR EXCLUDE ( SUBJAREA , "NURS" ) ) AND ( LIMIT-TO ( PUBSTAGE , "final" ) ) AND ( LIMI…	Scopus	The arabidopsis DREB2 genetic pathway is constitutively repressed by basal phosphoinositide-dependent phospholipase C coupled to diacylglycerol kinase	Djafi et al., 2013: Djafi, N., Vergnolle, C., Cantrel, C., Wietrzyñski, W., Delage, E., Cochet, F., Puyaubert, J., Soubigou-Taconnat, L., Gey, D., Collin, S., Balzergue, S., Zachowski, A., Ruelland, E.	Phosphoinositide-dependent phospholipases C (PI-PLCs) are activated in response to various stimuli. They utilize substrates provided by type III-Phosphatidylinositol-4 kinases (PI4KIII) to produce inositol triphosphate and diacylglycerol (DAG) that is phosphorylated into phosphatidic acid (PA) by DAG-kinases (DGKs). The roles of PI4KIIIs, PI-PLCs, and DGKs in basal signaling are poorly understood…	Rejected	no drought stress
ALL ( dreb2 AND "drought stress" ) AND ( LIMIT-TO ( DOCTYPE , "ar" ) ) AND ( LIMIT-TO ( LANGUAGE , "English" ) ) AND ( EXCLUDE ( SUBJAREA , "MEDI" ) OR EXCLUDE ( SUBJAREA , "NEUR" ) OR EXCLUDE ( SUBJAREA , "PHAR" ) OR EXCLUDE ( SUBJAREA , "VETE" ) OR EXCLUDE ( SUBJAREA , "PHYS" ) OR EXCLUDE ( SUBJAREA , "ECON" ) OR EXCLUDE ( SUBJAREA , "NURS" ) ) AND ( LIMIT-TO ( PUBSTAGE , "final" ) ) AND ( LIMI…	Scopus	Differential regulation of transcript accumulation and alternative splicing of a DREB2 homolog under abiotic stress conditions in common wheat	Egawa et al., 2006: Egawa, C., Kobayashi, F., Ishibashi, M., Nakamura, T., Nakamura, C., Takumi, S.	A number of cold responsive (Cor)/late embryogenesis abundant (Lea) genes are induced by both low temperature (LT) and dehydration. To understand the molecular basis of cold acclimation and its relationship with drought stress response in wheat seedlings, we isolated a DREB2 homolog Wdreb2, which is the candidate gene for a transcription factor of the Cor/Lea genes. The Wdreb2 expression was acti…	Rejected	no fold change of DREB2
ALL ( dreb2 AND "drought stress" ) AND ( LIMIT-TO ( DOCTYPE , "ar" ) ) AND ( LIMIT-TO ( LANGUAGE , "English" ) ) AND ( EXCLUDE ( SUBJAREA , "MEDI" ) OR EXCLUDE ( SUBJAREA , "NEUR" ) OR EXCLUDE ( SUBJAREA , "PHAR" ) OR EXCLUDE ( SUBJAREA , "VETE" ) OR EXCLUDE ( SUBJAREA , "PHYS" ) OR EXCLUDE ( SUBJAREA , "ECON" ) OR EXCLUDE ( SUBJAREA , "NURS" ) ) AND ( LIMIT-TO ( PUBSTAGE , "final" ) ) AND ( LIMI…	Scopus	Phenolic compounds increase their concentration in Carica papaya leaves under drought stress	Espadas et al, 2019: Espadas, J.L., Castaño, E., Marina, M.L., Rodríguez, L.C., Plaza, M.	Carica papaya L. cv. Maradol is a tropical plant with high commercial value due to its consumption and high nutritional value. Recent studies have corroborated a great diversity of biological activities in extracts from different tissues of the plant that seem to be caused by the presence of phenolic compounds. In this study, the effect of drought stress on the contents of phenolic compounds and …	Rejected	no expression of DREB2
ALL ( dreb2 AND "drought stress" ) AND ( LIMIT-TO ( DOCTYPE , "ar" ) ) AND ( LIMIT-TO ( LANGUAGE , "English" ) ) AND ( EXCLUDE ( SUBJAREA , "MEDI" ) OR EXCLUDE ( SUBJAREA , "NEUR" ) OR EXCLUDE ( SUBJAREA , "PHAR" ) OR EXCLUDE ( SUBJAREA , "VETE" ) OR EXCLUDE ( SUBJAREA , "PHYS" ) OR EXCLUDE ( SUBJAREA , "ECON" ) OR EXCLUDE ( SUBJAREA , "NURS" ) ) AND ( LIMIT-TO ( PUBSTAGE , "final" ) ) AND ( LIMI…	Scopus	Comparative molecular and metabolic profiling of two contrasting wheat cultivars under drought stress	Fadoul et al., 2021: Fadoul, H.E., Rivas, F.J.M., Neumann, K., Balazadeh, S., Fernie, A.R., Alseekh, S.	Drought is one of the most important threats to plants and agriculture; therefore, understanding of the mechanisms of drought tolerance is crucial for breeding of new tolerant varieties. Here, we assessed the effects of a long-term water deficit stress simulated on a precision phenotyping system on some morphological criteria and metabolite traits, as well as the expression of drought associated …	Rejected	no expression of DREB2
ALL ( dreb2 AND "drought stress" ) AND ( LIMIT-TO ( DOCTYPE , "ar" ) ) AND ( LIMIT-TO ( LANGUAGE , "English" ) ) AND ( EXCLUDE ( SUBJAREA , "MEDI" ) OR EXCLUDE ( SUBJAREA , "NEUR" ) OR EXCLUDE ( SUBJAREA , "PHAR" ) OR EXCLUDE ( SUBJAREA , "VETE" ) OR EXCLUDE ( SUBJAREA , "PHYS" ) OR EXCLUDE ( SUBJAREA , "ECON" ) OR EXCLUDE ( SUBJAREA , "NURS" ) ) AND ( LIMIT-TO ( PUBSTAGE , "final" ) ) AND ( LIMI…	Scopus	Characterization of FeDREB1 promoter involved in cold- and drought-inducible expression from common buckwheat (Fagopyrum esculentum)	Fang et al., 2015: Fang, Z.W., Xu, X.Y., Gao, J.F., Wang, P.K., Liu, Z.X., Feng, B.L.	C-repeat-binding factor (CBF)/dehydration-responsive element (DREB) transcription factors play key roles in plant stress responses. However, little information is available on the regulation of CBF/DREB expression. In this study, we isolated and characterized the FeDREB1 promoter sequence from the common buckwheat accession Xinong 9976. To identify the upstream region of the FeDREB1 gene required…	Rejected	no expression of DREB2
ALL ( dreb2 AND "drought stress" ) AND ( LIMIT-TO ( DOCTYPE , "ar" ) ) AND ( LIMIT-TO ( LANGUAGE , "English" ) ) AND ( EXCLUDE ( SUBJAREA , "MEDI" ) OR EXCLUDE ( SUBJAREA , "NEUR" ) OR EXCLUDE ( SUBJAREA , "PHAR" ) OR EXCLUDE ( SUBJAREA , "VETE" ) OR EXCLUDE ( SUBJAREA , "PHYS" ) OR EXCLUDE ( SUBJAREA , "ECON" ) OR EXCLUDE ( SUBJAREA , "NURS" ) ) AND ( LIMIT-TO ( PUBSTAGE , "final" ) ) AND ( LIMI…	Scopus	The poplar R2R3 MYB transcription factor PtrMYB94 coordinates with abscisic acid signaling to improve drought tolerance in plants	Fang et al., 2019: Fang, Q., Wang, X., Wang, H., Tang, X., Liu, C., Yin, H., Ye, S., Jiang, Y., Duan, Y., Luo, K.	In plants, R2R3 MYB transcription factors (TFs) consist of one large gene family and are involved in the regulation of many developmental processes and various stresses. However, the functions of most of MYB TFs in woody plants remain unknown. Here, PtrMYB94, an R2R3 MYB TF from Populus trichocarpa, is characterized to be involved in the regulation of drought responses and abscisic acid (ABA) sig…	Rejected	Populus
ALL ( dreb2 AND "drought stress" ) AND ( LIMIT-TO ( DOCTYPE , "ar" ) ) AND ( LIMIT-TO ( LANGUAGE , "English" ) ) AND ( EXCLUDE ( SUBJAREA , "MEDI" ) OR EXCLUDE ( SUBJAREA , "NEUR" ) OR EXCLUDE ( SUBJAREA , "PHAR" ) OR EXCLUDE ( SUBJAREA , "VETE" ) OR EXCLUDE ( SUBJAREA , "PHYS" ) OR EXCLUDE ( SUBJAREA , "ECON" ) OR EXCLUDE ( SUBJAREA , "NURS" ) ) AND ( LIMIT-TO ( PUBSTAGE , "final" ) ) AND ( LIMI…	Scopus	The Transcription Factor MdERF78 Is Involved in ALA-Induced Anthocyanin Accumulation in Apples	Fang et al., 2022: Fang, X., Zhang, L., Wang, L.	As a friendly plant growth regulator to the environment, 5-aminolevulinic acid (ALA) has been widely used in plant production, such as fruit coloration, stress resistance, and so on. Previous studies have identified some genes that have a function in the anthocyanin accumulation induced by ALA. However, the regulatory mechanism has not been well revealed. In the current study, we proposed that an…	Rejected	no expression of DREB2
ALL ( dreb2 AND "drought stress" ) AND ( LIMIT-TO ( DOCTYPE , "ar" ) ) AND ( LIMIT-TO ( LANGUAGE , "English" ) ) AND ( EXCLUDE ( SUBJAREA , "MEDI" ) OR EXCLUDE ( SUBJAREA , "NEUR" ) OR EXCLUDE ( SUBJAREA , "PHAR" ) OR EXCLUDE ( SUBJAREA , "VETE" ) OR EXCLUDE ( SUBJAREA , "PHYS" ) OR EXCLUDE ( SUBJAREA , "ECON" ) OR EXCLUDE ( SUBJAREA , "NURS" ) ) AND ( LIMIT-TO ( PUBSTAGE , "final" ) ) AND ( LIMI…	Scopus	A small heat shock protein CaHsp25.9 positively regulates heat, salt, and drought stress tolerance in pepper (Capsicum annuum L.)	Feng et al., 2019: Feng, X.-H., Zhang, H.-X., Ali, M., Gai, W.-X., Cheng, G.-X., Yu, Q.-H., Yang, S.-B., Li, X.-X., Gong, Z.-H.	Extreme environmental conditions seriously affect crop growth and development, resulting in a decrease in crop yield and quality. However, small heat shock proteins (Hsp20s) play an important role in helping plants to avoid these negative impacts. In this study, we identified the expression pattern of the CaHsp25.9 gene in a thermo-tolerance pepper line R9 and thermo-sensitive line B6. The transc…	Rejected	no DREB2 expression
ALL ( dreb2 AND "drought stress" ) AND ( LIMIT-TO ( DOCTYPE , "ar" ) ) AND ( LIMIT-TO ( LANGUAGE , "English" ) ) AND ( EXCLUDE ( SUBJAREA , "MEDI" ) OR EXCLUDE ( SUBJAREA , "NEUR" ) OR EXCLUDE ( SUBJAREA , "PHAR" ) OR EXCLUDE ( SUBJAREA , "VETE" ) OR EXCLUDE ( SUBJAREA , "PHYS" ) OR EXCLUDE ( SUBJAREA , "ECON" ) OR EXCLUDE ( SUBJAREA , "NURS" ) ) AND ( LIMIT-TO ( PUBSTAGE , "final" ) ) AND ( LIMI…	Scopus	Mechanisms of plant response to salt and drought stress and their alteration by rhizobacteria	Forni et al., 2017: Forni, C., Duca, D., Glick, B.R.	Soil salinity and drought are an enormous worldwide problem for agriculture, horticulture and silviculture. The initial responses of plants to drought and salinity are similar; both are attributed to water deficit which inhibits plant growth and development. Scope: In this review, an overview of the major physiological and biochemical changes that occur in plants as a consequence of salt and drou…	Rejected	no expression of DREB2
ALL ( dreb2 AND "drought stress" ) AND ( LIMIT-TO ( DOCTYPE , "ar" ) ) AND ( LIMIT-TO ( LANGUAGE , "English" ) ) AND ( EXCLUDE ( SUBJAREA , "MEDI" ) OR EXCLUDE ( SUBJAREA , "NEUR" ) OR EXCLUDE ( SUBJAREA , "PHAR" ) OR EXCLUDE ( SUBJAREA , "VETE" ) OR EXCLUDE ( SUBJAREA , "PHYS" ) OR EXCLUDE ( SUBJAREA , "ECON" ) OR EXCLUDE ( SUBJAREA , "NURS" ) ) AND ( LIMIT-TO ( PUBSTAGE , "final" ) ) AND ( LIMI…	Scopus	Constitutive gibberellin response in grafted tomato modulates root-to-shoot signaling under drought stress	Gaion et al., 2018: Gaion, L.A., Monteiro, C.C., Cruz, F.J.R., Rossatto, D.R., López-Díaz, I., Carrera, E., Lima, J.E., Peres, L.E.P., Carvalho, R.F.	Plants are sessile organisms that must perceive and respond to various environmental constraints throughout their life cycle. Among these constraints, drought stress has become the main limiting factor to crop production around the world. Water deprivation is perceived primarily by the roots, which efficiently signal the shoot to trigger drought responses in order to maximize a plant's ability to…	Rejected	no expression of DREB2
ALL ( dreb2 AND "drought stress" ) AND ( LIMIT-TO ( DOCTYPE , "ar" ) ) AND ( LIMIT-TO ( LANGUAGE , "English" ) ) AND ( EXCLUDE ( SUBJAREA , "MEDI" ) OR EXCLUDE ( SUBJAREA , "NEUR" ) OR EXCLUDE ( SUBJAREA , "PHAR" ) OR EXCLUDE ( SUBJAREA , "VETE" ) OR EXCLUDE ( SUBJAREA , "PHYS" ) OR EXCLUDE ( SUBJAREA , "ECON" ) OR EXCLUDE ( SUBJAREA , "NURS" ) ) AND ( LIMIT-TO ( PUBSTAGE , "final" ) ) AND ( LIMI…	Scopus	Physiological and molecular responses to drought stress in teak (Tectona grandis L.f.)	Galeano et al., 2019: Galeano, E., Vasconcelos, T.S., De Oliveira, P.N., Carrer, H.	Drought stress is an increasingly common and worrying phenomenon because it causes a loss of production in both agriculture and forestry. Teak is a tropical tree which needs alternating rainy and dry seasons to produce high-quality wood. However, a robust understanding about the physiological characteristics and genes related to drought stress in this species is lacking. Consequently, after apply…	Rejected	no expression of DREB2
ALL ( dreb2 AND "drought stress" ) AND ( LIMIT-TO ( DOCTYPE , "ar" ) ) AND ( LIMIT-TO ( LANGUAGE , "English" ) ) AND ( EXCLUDE ( SUBJAREA , "MEDI" ) OR EXCLUDE ( SUBJAREA , "NEUR" ) OR EXCLUDE ( SUBJAREA , "PHAR" ) OR EXCLUDE ( SUBJAREA , "VETE" ) OR EXCLUDE ( SUBJAREA , "PHYS" ) OR EXCLUDE ( SUBJAREA , "ECON" ) OR EXCLUDE ( SUBJAREA , "NURS" ) ) AND ( LIMIT-TO ( PUBSTAGE , "final" ) ) AND ( LIMI…	Scopus	Genome-wide investigation on transcriptional responses to drought stress in wild and cultivated rice	Geng et al., 2021: Geng, M.-F., Wang, X.-H., Wang, M.-X., Cai, Z., Meng, Q.-L., Wang, X., Zhou, L., Han, J.-D., Li, J.-L., Zhang, F.-M., Guo, Y.-L., Ge, S.	Whole transcriptomic sequencing of the drought-tolerant (DT) and drought-sensitive (DS) accessions of cultivated and wild rice under drought treatments was performed to uncover the mechanism of plant adaptation to drought and to facilitate the development of drought-tolerant cultivars in crops. By analyzing the differentially expressed genes (DEGs) between the drought-treated and untreated sample…	Rejected	no expression of DREB2
ALL ( dreb2 AND "drought stress" ) AND ( LIMIT-TO ( DOCTYPE , "ar" ) ) AND ( LIMIT-TO ( LANGUAGE , "English" ) ) AND ( EXCLUDE ( SUBJAREA , "MEDI" ) OR EXCLUDE ( SUBJAREA , "NEUR" ) OR EXCLUDE ( SUBJAREA , "PHAR" ) OR EXCLUDE ( SUBJAREA , "VETE" ) OR EXCLUDE ( SUBJAREA , "PHYS" ) OR EXCLUDE ( SUBJAREA , "ECON" ) OR EXCLUDE ( SUBJAREA , "NURS" ) ) AND ( LIMIT-TO ( PUBSTAGE , "final" ) ) AND ( LIMI…	Scopus	Role of RcTINY2 in the Regulation of Drought and Salt Stress Response in Arabidopsis and Rose	Geng et al., 2022: Geng, L., Su, L., Wang, Y., Geng, Z., Lin, S., Zhang, Y., Yu, S., Fu, L., Liu, Q., Cheng, C., Jiang, X.	In plants, transcription factors (TFs) belonging to the APETALA2/ethylene responsive factor (AP2/ERF) superfamily regulate a variety of life processes, including germination, maturation, and stress response. In the present study, RcTINY2, a novel dehydration response element binding protein (DREB) belonging to the A-4 group, was identified and characterized in rose (Rosa chinensis). RcTINY2 share…	Rejected	no DREB2 expression
ALL ( dreb2 AND "drought stress" ) AND ( LIMIT-TO ( DOCTYPE , "ar" ) ) AND ( LIMIT-TO ( LANGUAGE , "English" ) ) AND ( EXCLUDE ( SUBJAREA , "MEDI" ) OR EXCLUDE ( SUBJAREA , "NEUR" ) OR EXCLUDE ( SUBJAREA , "PHAR" ) OR EXCLUDE ( SUBJAREA , "VETE" ) OR EXCLUDE ( SUBJAREA , "PHYS" ) OR EXCLUDE ( SUBJAREA , "ECON" ) OR EXCLUDE ( SUBJAREA , "NURS" ) ) AND ( LIMIT-TO ( PUBSTAGE , "final" ) ) AND ( LIMI…	Scopus	Rootstock-induced molecular responses associated with drought tolerance in sweet orange as revealed by RNA-Seq	Gonçalves et al., 2019: Gonçalves, L.P., Boscariol Camargo, R.L., Takita, M.A., Machado, M.A., Dos Soares Filho, W.S., Costa, M.G.C.	Citrus plants are commercially propagated by grafting, with the rootstock variety influencing a number of horticultural traits, including drought tolerance. Among the different rootstock varieties available for citrus propagation, 'Rangpur' lime is known to confer enhanced tolerance to drought as compared to other citrus rootstocks. The objective of this study was to investigate the poorly unders…	Rejected	no DREB2 expression
ALL ( dreb2 AND "drought stress" ) AND ( LIMIT-TO ( DOCTYPE , "ar" ) ) AND ( LIMIT-TO ( LANGUAGE , "English" ) ) AND ( EXCLUDE ( SUBJAREA , "MEDI" ) OR EXCLUDE ( SUBJAREA , "NEUR" ) OR EXCLUDE ( SUBJAREA , "PHAR" ) OR EXCLUDE ( SUBJAREA , "VETE" ) OR EXCLUDE ( SUBJAREA , "PHYS" ) OR EXCLUDE ( SUBJAREA , "ECON" ) OR EXCLUDE ( SUBJAREA , "NURS" ) ) AND ( LIMIT-TO ( PUBSTAGE , "final" ) ) AND ( LIMI…	Scopus	Influence of Copper Oxide Nanoparticles on Gene Expression of Birch Clones In Vitro under Stress Caused by Phytopathogens	Grodetskaya et al., 2022: Grodetskaya, T.A., Evlakov, P.M., Fedorova, O.A., Mikhin, V.I., Zakharova, O.V., Kolesnikov, E.A., Evtushenko, N.A., Gusev, A.A.	Recently, metal oxide nanoparticles (NPs) have attracted attention as promising components for the protection and stimulation of plant microclones in tissue culture in vitro. However, the effect of NPs on the genetic mechanisms underlying plant adaptive responses remains poorly understood. We studied the effect of column-shaped CuO NPs 50 nm in diameter and 70–100 nm in length at a concentration …	Rejected	no drought stress
ALL ( dreb2 AND "drought stress" ) AND ( LIMIT-TO ( DOCTYPE , "ar" ) ) AND ( LIMIT-TO ( LANGUAGE , "English" ) ) AND ( EXCLUDE ( SUBJAREA , "MEDI" ) OR EXCLUDE ( SUBJAREA , "NEUR" ) OR EXCLUDE ( SUBJAREA , "PHAR" ) OR EXCLUDE ( SUBJAREA , "VETE" ) OR EXCLUDE ( SUBJAREA , "PHYS" ) OR EXCLUDE ( SUBJAREA , "ECON" ) OR EXCLUDE ( SUBJAREA , "NURS" ) ) AND ( LIMIT-TO ( PUBSTAGE , "final" ) ) AND ( LIMI…	Scopus	Christolea crassifolia HARDY gene enhances drought stress tolerance in transgenic tomato plants	Guo et al., 2017: Guo, X., Zhang, L., Zhu, J., Wang, A., Liu, H.	Christolea crassifolia HARDY: gene (CcHRD) belongs to the AP2/ERF-like tanscritpion factor family, and overexpression of HRD gene has been proved to result in improved water use efficiency and enhanced drought resistance in multiple plant species. In the present study, we cloned the CcHRD gene from Christolea crassifolia, which shares 99.1% sequence similarity with the HRD gene from Arabidopsis t…	Rejected	no expression of DREB2
ALL ( dreb2 AND "drought stress" ) AND ( LIMIT-TO ( DOCTYPE , "ar" ) ) AND ( LIMIT-TO ( LANGUAGE , "English" ) ) AND ( EXCLUDE ( SUBJAREA , "MEDI" ) OR EXCLUDE ( SUBJAREA , "NEUR" ) OR EXCLUDE ( SUBJAREA , "PHAR" ) OR EXCLUDE ( SUBJAREA , "VETE" ) OR EXCLUDE ( SUBJAREA , "PHYS" ) OR EXCLUDE ( SUBJAREA , "ECON" ) OR EXCLUDE ( SUBJAREA , "NURS" ) ) AND ( LIMIT-TO ( PUBSTAGE , "final" ) ) AND ( LIMI…	Scopus	The APETALA2/ethylene-responsive factor transcription factor OsDERF2 negatively modulates drought stress in rice by repressing abscisic acid responsive genes	Guo et al., 2017: Guo, Y., Huang, R., Duan, L., Wang, J.	APETALA2/ethylene-responsive factor (AP2/ERF) family transcription factors play a vital role in plant growth and in response to hormones and abiotic stresses. In the current research, it is reported that OsDERF2, one of the drought-responsive ERF, is a member of the DREB sub-family. OsDERF2 is a nuclear-localized protein and has transcriptional activity in yeast. Expression of OsDERF2 was induced…	Rejected	no expression of DREB2
ALL ( dreb2 AND "drought stress" ) AND ( LIMIT-TO ( DOCTYPE , "ar" ) ) AND ( LIMIT-TO ( LANGUAGE , "English" ) ) AND ( EXCLUDE ( SUBJAREA , "MEDI" ) OR EXCLUDE ( SUBJAREA , "NEUR" ) OR EXCLUDE ( SUBJAREA , "PHAR" ) OR EXCLUDE ( SUBJAREA , "VETE" ) OR EXCLUDE ( SUBJAREA , "PHYS" ) OR EXCLUDE ( SUBJAREA , "ECON" ) OR EXCLUDE ( SUBJAREA , "NURS" ) ) AND ( LIMIT-TO ( PUBSTAGE , "final" ) ) AND ( LIMI…	Scopus	Association of candidate genes with drought tolerance traits in zoysiagrass germplasm	Guo et al., 2019: Guo, H., Wang, Y., Zhang, B., Li, D., Chen, J., Zong, J., Li, J., Liu, J., Jiang, Y.	Drought stress negatively influences the growth and physiology of perennial grasses. The objective of this study was to identify associations of candidate genes with drought tolerance traits in 96 zoysiagrass (Zoysia Willd.) accessions. Germplasm varied largely in leaf wilting, canopy and air temperature difference (CAD), leaf water content (LWC), chlorophyll fluorescence (Fv/Fm), leaf dry weight…	Rejected	no DREB2 expression
ALL ( dreb2 AND "drought stress" ) AND ( LIMIT-TO ( DOCTYPE , "ar" ) ) AND ( LIMIT-TO ( LANGUAGE , "English" ) ) AND ( EXCLUDE ( SUBJAREA , "MEDI" ) OR EXCLUDE ( SUBJAREA , "NEUR" ) OR EXCLUDE ( SUBJAREA , "PHAR" ) OR EXCLUDE ( SUBJAREA , "VETE" ) OR EXCLUDE ( SUBJAREA , "PHYS" ) OR EXCLUDE ( SUBJAREA , "ECON" ) OR EXCLUDE ( SUBJAREA , "NURS" ) ) AND ( LIMIT-TO ( PUBSTAGE , "final" ) ) AND ( LIMI…	Scopus	Transcription factor CBF4 is a regulator of drought adaptation in Arabidopsis	Haake et al., 2002: Haake, V., Cook, D., Riechmann, J.L., Pineda, O., Thomashow, M.F., Zhang, J.Z.	In plants, low temperature and dehydration activate a set of genes containing C-repeat/dehydration-responsive elements in their promoter. It has been shown previously that the Arabidopsis CBF/DREB1 transcription activators are critical regulators of gene expression in the signal transduction of cold acclimation. Here, we report the isolation of an apparent homolog of the CBF/DREB1 proteins (CBF4)…	Rejected	no expression of DREB2
ALL ( dreb2 AND "drought stress" ) AND ( LIMIT-TO ( DOCTYPE , "ar" ) ) AND ( LIMIT-TO ( LANGUAGE , "English" ) ) AND ( EXCLUDE ( SUBJAREA , "MEDI" ) OR EXCLUDE ( SUBJAREA , "NEUR" ) OR EXCLUDE ( SUBJAREA , "PHAR" ) OR EXCLUDE ( SUBJAREA , "VETE" ) OR EXCLUDE ( SUBJAREA , "PHYS" ) OR EXCLUDE ( SUBJAREA , "ECON" ) OR EXCLUDE ( SUBJAREA , "NURS" ) ) AND ( LIMIT-TO ( PUBSTAGE , "final" ) ) AND ( LIMI…	Scopus	Drought stress revealed physiological, biochemical and gene-expressional variations in ‘Yoshihime’ peach (Prunus persica L) cultivar	Haider et al., 2018: Haider, M.S., Kurjogi, M.M., Khalil-ur-Rehman, M., Pervez, T., Songtao, J., Fiaz, M., Jogaiah, S., Wang, C., Fang, J.	It is indispensable to comprehend the mechanism that regulates plant responses to drought conditions to intensify the water use efficiency of stone fruits. The physiological, biochemical and molecular responses of drought-treated peach leaves were investigated. Results revealed that drought-treated plants manifested a significant attenuation in water potential as compared to control plants. Furth…	Rejected	Prunus Persica
ALL ( dreb2 AND "drought stress" ) AND ( LIMIT-TO ( DOCTYPE , "ar" ) ) AND ( LIMIT-TO ( LANGUAGE , "English" ) ) AND ( EXCLUDE ( SUBJAREA , "MEDI" ) OR EXCLUDE ( SUBJAREA , "NEUR" ) OR EXCLUDE ( SUBJAREA , "PHAR" ) OR EXCLUDE ( SUBJAREA , "VETE" ) OR EXCLUDE ( SUBJAREA , "PHYS" ) OR EXCLUDE ( SUBJAREA , "ECON" ) OR EXCLUDE ( SUBJAREA , "NURS" ) ) AND ( LIMIT-TO ( PUBSTAGE , "final" ) ) AND ( LIMI…	Scopus	Identification and expression analysis of genes responsive to drought stress in peanut	Hou et al., 2014: Hou, L., Liu, W., Li, Z., Huang, C., Fang, X.L., Wang, Q., Liu, X.	Although peanut (Arachis hypogaea L.) is a relatively drought[1]tolerant crop, its productivity and quality is adversely affected by drought stress. The identification of novel genes, the analysis of gene expression patterns in response to dehydration stress, and the evaluation of their potential functions in stress adaptation will provide the basis for effective engineering strategies to improve…	Rejected	no expression of DREB2
ALL ( dreb2 AND "drought stress" ) AND ( LIMIT-TO ( DOCTYPE , "ar" ) ) AND ( LIMIT-TO ( LANGUAGE , "English" ) ) AND ( EXCLUDE ( SUBJAREA , "MEDI" ) OR EXCLUDE ( SUBJAREA , "NEUR" ) OR EXCLUDE ( SUBJAREA , "PHAR" ) OR EXCLUDE ( SUBJAREA , "VETE" ) OR EXCLUDE ( SUBJAREA , "PHYS" ) OR EXCLUDE ( SUBJAREA , "ECON" ) OR EXCLUDE ( SUBJAREA , "NURS" ) ) AND ( LIMIT-TO ( PUBSTAGE , "final" ) ) AND ( LIMI…	Scopus	Identifying QTLs for Grain Size in a Colossal Grain Rice (Oryza sativa L.) Line, and Analysis of Additive Effects of QTLs	Hou et al., 2022: Hou, X., Chen, M., Chen, Y., Hou, X., Jia, Z., Yang, X., Zhang, J., Liu, Y., Ye, N.	Grain size is an important component of quality and harvest traits in the field of rice breeding. Although numerous quantitative trait loci (QTLs) of grain size in rice have been reported, the molecular mechanisms of these QTLs remain poorly understood, and further research on QTL observation and candidate gene identification is warranted. In our research, we developed a suite of F2 intercross po…	Rejected	no expression of DREB2
ALL ( dreb2 AND "drought stress" ) AND ( LIMIT-TO ( DOCTYPE , "ar" ) ) AND ( LIMIT-TO ( LANGUAGE , "English" ) ) AND ( EXCLUDE ( SUBJAREA , "MEDI" ) OR EXCLUDE ( SUBJAREA , "NEUR" ) OR EXCLUDE ( SUBJAREA , "PHAR" ) OR EXCLUDE ( SUBJAREA , "VETE" ) OR EXCLUDE ( SUBJAREA , "PHYS" ) OR EXCLUDE ( SUBJAREA , "ECON" ) OR EXCLUDE ( SUBJAREA , "NURS" ) ) AND ( LIMIT-TO ( PUBSTAGE , "final" ) ) AND ( LIMI…	Scopus	Functional roles of the birch BpRAV1 transcription factor in salt and osmotic stress response	Hu et al., 2022: Hu, P., Zhang, K., Yang, C.	RAV (Related to ABI3/VP1) transcription factors play vital roles in regulating plant response to abiotic stresses; however, the regulatory mechanisms underlying stress response are still poorly understood for most of the RAVgenes. In this study, a novel gene BpRAV1 was cloned from white birch (Betula platyphylla). BpRAV1 protein is localized in the nucleus and serves as a transcriptional activato…	Rejected	no expression of DREB2
ALL ( dreb2 AND "drought stress" ) AND ( LIMIT-TO ( DOCTYPE , "ar" ) ) AND ( LIMIT-TO ( LANGUAGE , "English" ) ) AND ( EXCLUDE ( SUBJAREA , "MEDI" ) OR EXCLUDE ( SUBJAREA , "NEUR" ) OR EXCLUDE ( SUBJAREA , "PHAR" ) OR EXCLUDE ( SUBJAREA , "VETE" ) OR EXCLUDE ( SUBJAREA , "PHYS" ) OR EXCLUDE ( SUBJAREA , "ECON" ) OR EXCLUDE ( SUBJAREA , "NURS" ) ) AND ( LIMIT-TO ( PUBSTAGE , "final" ) ) AND ( LIMI…	Scopus	Characterization of transcription factor gene OSDRAP1 conferring drought tolerance in rice	Huang et al., 2018: Huang, L., Wang, Y., Wang, W., Zhao, X., Qin, Q., Sun, F., Hu, F., Zhao, Y., Li, Z., Fu, B., Li, Z.	The dehydration responsive element binding (DREBs) genes are important transcription factors which play a crucial role in plant abiotic stress tolerances. In this study, we functionally characterized a DREB2-like gene, OsDRAP1 conferring drought tolerance (DT) in rice. OsDRAP1, containing many cis-elements in its promoter region, was expressed in all organs (mainly expressed in vascular tissues) …	Rejected	OsDRAP1 in rice
ALL ( dreb2 AND "drought stress" ) AND ( LIMIT-TO ( DOCTYPE , "ar" ) ) AND ( LIMIT-TO ( LANGUAGE , "English" ) ) AND ( EXCLUDE ( SUBJAREA , "MEDI" ) OR EXCLUDE ( SUBJAREA , "NEUR" ) OR EXCLUDE ( SUBJAREA , "PHAR" ) OR EXCLUDE ( SUBJAREA , "VETE" ) OR EXCLUDE ( SUBJAREA , "PHYS" ) OR EXCLUDE ( SUBJAREA , "ECON" ) OR EXCLUDE ( SUBJAREA , "NURS" ) ) AND ( LIMIT-TO ( PUBSTAGE , "final" ) ) AND ( LIMI…	Scopus	Arabidopsis ERF012 Is a Versatile Regulator of Plant Growth, Development and Abiotic Stress Responses	Huang et al., 2022: Huang, Y., Liu, L., Hu, H., Tang, N., Shi, L., Xu, F., Wang, S.	The AP2/ERF transcription factors are widely involved in the regulation of plant growth, development and stress responses. Arabidopsis ERF012 is differentially responsive to various stresses; however, its potential regulatory role remains elusive. Here, we show that ERF012 is predominantly expressed in the vascular bundles, lateral root primordium and vein branch points. ERF012 overex-pression in…	Rejected	no expression of DREB2
ALL ( dreb2 AND "drought stress" ) AND ( LIMIT-TO ( DOCTYPE , "ar" ) ) AND ( LIMIT-TO ( LANGUAGE , "English" ) ) AND ( EXCLUDE ( SUBJAREA , "MEDI" ) OR EXCLUDE ( SUBJAREA , "NEUR" ) OR EXCLUDE ( SUBJAREA , "PHAR" ) OR EXCLUDE ( SUBJAREA , "VETE" ) OR EXCLUDE ( SUBJAREA , "PHYS" ) OR EXCLUDE ( SUBJAREA , "ECON" ) OR EXCLUDE ( SUBJAREA , "NURS" ) ) AND ( LIMIT-TO ( PUBSTAGE , "final" ) ) AND ( LIMI…	Scopus	Exogenous Melatonin mediates the regulation of endogenous nitric oxide in Glycine max L. to reduce effects of drought stress	Imran et al., 2021: Imran, M., Shazad, R., Bilal, S., Imran, Q.M., Khan, M., Kang, S.-M., Khan, A.L., Yun, B.-W., Lee, I.-J.	Drought stress retards plant growth and yield. Melatonin and nitric oxide (NO) have demonstrated their potential role against abiotic stresses; however, the underlying molecular mechanism by which they interact and extend drought stress tolerance has not been fully elucidated. Herein, the current study was performed to establish the optimum beneficial concentration of MT and NO in combating droug…	Rejected	no expression of DREB2
ALL ( dreb2 AND "drought stress" ) AND ( LIMIT-TO ( DOCTYPE , "ar" ) ) AND ( LIMIT-TO ( LANGUAGE , "English" ) ) AND ( EXCLUDE ( SUBJAREA , "MEDI" ) OR EXCLUDE ( SUBJAREA , "NEUR" ) OR EXCLUDE ( SUBJAREA , "PHAR" ) OR EXCLUDE ( SUBJAREA , "VETE" ) OR EXCLUDE ( SUBJAREA , "PHYS" ) OR EXCLUDE ( SUBJAREA , "ECON" ) OR EXCLUDE ( SUBJAREA , "NURS" ) ) AND ( LIMIT-TO ( PUBSTAGE , "final" ) ) AND ( LIMI…	Scopus	Mercury toxicity affects oxidative metabolism and induces stress responsive mechanisms in wheat (Triticum aestivum L.)	İşkil et al., 2022: İşkil, R., Surgun-Acar, Y., Çatav, Ş.S., Zemheri-Navruz, F., Erden, Y.	Mercury (Hg) toxicity is an increasing problem worldwide, with a negative impact on the environment and living organisms including both animals and plants. In this study, we analyzed molecular and biochemical changes related to Hg toxicity in wheat (Triticum aestivum L.) seedlings. Seven-day-old seedlings were exposed to various concentrations (5, 10, and 20 µM) of HgCl2 for 24 and 48 h. Our resu…	Rejected	no drought stress
ALL ( dreb2 AND "drought stress" ) AND ( LIMIT-TO ( DOCTYPE , "ar" ) ) AND ( LIMIT-TO ( LANGUAGE , "English" ) ) AND ( EXCLUDE ( SUBJAREA , "MEDI" ) OR EXCLUDE ( SUBJAREA , "NEUR" ) OR EXCLUDE ( SUBJAREA , "PHAR" ) OR EXCLUDE ( SUBJAREA , "VETE" ) OR EXCLUDE ( SUBJAREA , "PHYS" ) OR EXCLUDE ( SUBJAREA , "ECON" ) OR EXCLUDE ( SUBJAREA , "NURS" ) ) AND ( LIMIT-TO ( PUBSTAGE , "final" ) ) AND ( LIMI…	Scopus	Glutathione peroxidase of Pennisetum glaucum (PgGPx) is a functional Cd2+ dependent peroxiredoxin that enhances tolerance against salinity and drought stress	Islam et al., 2015: Islam, T., Manna, M., Reddy, M.K.	Reactive oxygen species (ROS) arise in the plant system due to inevitable influence of various environmental stimuli. Glutathione peroxidases are one of the important ROS scavengers inside the cell. A glutathione peroxidase (PgGPx) gene was previously found from Pennisetum glauccum abiotic stressed cDNA library. Enzyme kinetics data revealed that PgGPx possessed preference towards thioredoxin rat…	Rejected	no expression of DREB2
ALL ( dreb2 AND "drought stress" ) AND ( LIMIT-TO ( DOCTYPE , "ar" ) ) AND ( LIMIT-TO ( LANGUAGE , "English" ) ) AND ( EXCLUDE ( SUBJAREA , "MEDI" ) OR EXCLUDE ( SUBJAREA , "NEUR" ) OR EXCLUDE ( SUBJAREA , "PHAR" ) OR EXCLUDE ( SUBJAREA , "VETE" ) OR EXCLUDE ( SUBJAREA , "PHYS" ) OR EXCLUDE ( SUBJAREA , "ECON" ) OR EXCLUDE ( SUBJAREA , "NURS" ) ) AND ( LIMIT-TO ( PUBSTAGE , "final" ) ) AND ( LIMI…	Scopus	Genome-wide profiling reveals extensive alterations in Pseudomonas putida-mediated miRNAs expression during drought stress in chickpea (Cicer arietinum L.)	Jatan et al., 2019: Jatan, R., Tiwari, S., Asif, M.H., Lata, C.	Pseudomonas putida strain MTCC5279 (RA) is a plant growth promoting rhizobacteria which improves growth and development of plants by colonizing their root surface and also confers drought stress tolerance. Further, along with several stress responsive genes, microRNAs are also well known for their crucial involvement in drought stress response. Considering the above, in this study, we performed i…	Rejected	no expression of DREB2
ALL ( dreb2 AND "drought stress" ) AND ( LIMIT-TO ( DOCTYPE , "ar" ) ) AND ( LIMIT-TO ( LANGUAGE , "English" ) ) AND ( EXCLUDE ( SUBJAREA , "MEDI" ) OR EXCLUDE ( SUBJAREA , "NEUR" ) OR EXCLUDE ( SUBJAREA , "PHAR" ) OR EXCLUDE ( SUBJAREA , "VETE" ) OR EXCLUDE ( SUBJAREA , "PHYS" ) OR EXCLUDE ( SUBJAREA , "ECON" ) OR EXCLUDE ( SUBJAREA , "NURS" ) ) AND ( LIMIT-TO ( PUBSTAGE , "final" ) ) AND ( LIMI…	Scopus	Transcriptomic analysis of Sorghum bicolor responding to combined heat and drought stress	Johnson et al., 2014: Johnson, S.M., Lim, F.-L., Finkler, A., Fromm, H., Slabas, A.R., Knight, M.R.	Abiotic stresses which include drought and heat are amongst the main limiting factors for plant growth and crop productivity. In the field, these stress types are rarely presented individually and plants are often subjected to a combination of stress types. Sorghum bicolor is a cereal crop which is grown in arid and semi-arid regions and is particularly well adapted to the hot and dry conditions …	Rejected	no expression of DREB2
ALL ( dreb2 AND "drought stress" ) AND ( LIMIT-TO ( DOCTYPE , "ar" ) ) AND ( LIMIT-TO ( LANGUAGE , "English" ) ) AND ( EXCLUDE ( SUBJAREA , "MEDI" ) OR EXCLUDE ( SUBJAREA , "NEUR" ) OR EXCLUDE ( SUBJAREA , "PHAR" ) OR EXCLUDE ( SUBJAREA , "VETE" ) OR EXCLUDE ( SUBJAREA , "PHYS" ) OR EXCLUDE ( SUBJAREA , "ECON" ) OR EXCLUDE ( SUBJAREA , "NURS" ) ) AND ( LIMIT-TO ( PUBSTAGE , "final" ) ) AND ( LIMI…	Scopus	Alternate mild drought stress (−0.1 MPa PEG) immunizes sensitive chickpea cultivar against lethal chilling by accentuating the defense mechanisms	Kaur et al., 2016: Kaur, S., Jairath, A., Singh, I., Nayyar, H., Kumar, S.	The changes in climate particularly, the rise in temperature and humidity affect the physiological functions of plants subsequently affecting crop productivity adversely. A strategy is required which can be directly implemented in fields to induce the tolerance in crop plants. In present study, two chickpea varieties with contrasting sensitivity PDG3 (Tolerant) and GPF2 (Sensitive) were raised hy…	Rejected	no expression of DREB2
ALL ( dreb2 AND "drought stress" ) AND ( LIMIT-TO ( DOCTYPE , "ar" ) ) AND ( LIMIT-TO ( LANGUAGE , "English" ) ) AND ( EXCLUDE ( SUBJAREA , "MEDI" ) OR EXCLUDE ( SUBJAREA , "NEUR" ) OR EXCLUDE ( SUBJAREA , "PHAR" ) OR EXCLUDE ( SUBJAREA , "VETE" ) OR EXCLUDE ( SUBJAREA , "PHYS" ) OR EXCLUDE ( SUBJAREA , "ECON" ) OR EXCLUDE ( SUBJAREA , "NURS" ) ) AND ( LIMIT-TO ( PUBSTAGE , "final" ) ) AND ( LIMI…	Scopus	Chromatin regulation functions in plant abiotic stress responses	Kim et al., 2010: Kim, J.-M., To, T.K., Nishioka, T., Seki, M.	Plants respond and adapt to drought, cold and high-salinity stress in order to survive. Molecular and genomic studies have revealed that many stress-inducible genes with various functions and signalling factors, such as transcription factors, protein kinases and protein phosphatases, are involved in the stress responses. Recent studies have revealed the coordination of the gene expression and chr…	Rejected	no expression of DREB2
ALL ( dreb2 AND "drought stress" ) AND ( LIMIT-TO ( DOCTYPE , "ar" ) ) AND ( LIMIT-TO ( LANGUAGE , "English" ) ) AND ( EXCLUDE ( SUBJAREA , "MEDI" ) OR EXCLUDE ( SUBJAREA , "NEUR" ) OR EXCLUDE ( SUBJAREA , "PHAR" ) OR EXCLUDE ( SUBJAREA , "VETE" ) OR EXCLUDE ( SUBJAREA , "PHYS" ) OR EXCLUDE ( SUBJAREA , "ECON" ) OR EXCLUDE ( SUBJAREA , "NURS" ) ) AND ( LIMIT-TO ( PUBSTAGE , "final" ) ) AND ( LIMI…	Scopus	Characterization and comparative expression analysis of CUL1 genes in rice	Kim et al., 2018: Kim, S.-H., Woo, O.-G., Jang, H., Lee, J.-H.	Cullin-RING E3 ubiquitin ligase (CRL) complex is known as the largest family of E3 ligases. The most widely characterized CRL, SCF complex (CRL1), utilizes CUL1 as a scaffold protein to assemble the complex components. To better understand CRL1-mediated cellular processes in rice, three CUL1 genes (OsCUL1s) were isolated in Oryza sativa. Although all OsCUL1 proteins exhibited high levels of amino…	Rejected	no fold change of DREB2
ALL ( dreb2 AND "drought stress" ) AND ( LIMIT-TO ( DOCTYPE , "ar" ) ) AND ( LIMIT-TO ( LANGUAGE , "English" ) ) AND ( EXCLUDE ( SUBJAREA , "MEDI" ) OR EXCLUDE ( SUBJAREA , "NEUR" ) OR EXCLUDE ( SUBJAREA , "PHAR" ) OR EXCLUDE ( SUBJAREA , "VETE" ) OR EXCLUDE ( SUBJAREA , "PHYS" ) OR EXCLUDE ( SUBJAREA , "ECON" ) OR EXCLUDE ( SUBJAREA , "NURS" ) ) AND ( LIMIT-TO ( PUBSTAGE , "final" ) ) AND ( LIMI…	Scopus	Double overexpression of DREB and PIF transcription factors improves drought stress tolerance and cell elongation in transgenic plants	Kudo et al., 2017: Kudo, M., Kidokoro, S., Yoshida, T., Mizoi, J., Todaka, D., Fernie, A.R., Shinozaki, K., Yamaguchi-Shinozaki, K.	Although a variety of transgenic plants that are tolerant to drought stress have been generated, many of these plants show growth retardation. To improve drought tolerance and plant growth, we applied a gene-stacking approach using two transcription factor genes: DEHYDRATION-RESPONSIVE ELEMENT-BINDING 1A (DREB1A) and rice PHYTOCHROME-INTERACTING FACTOR-LIKE 1 (OsPIL1). The overexpression of DREB1…	Rejected	no expression of DREB2
ALL ( dreb2 AND "drought stress" ) AND ( LIMIT-TO ( DOCTYPE , "ar" ) ) AND ( LIMIT-TO ( LANGUAGE , "English" ) ) AND ( EXCLUDE ( SUBJAREA , "MEDI" ) OR EXCLUDE ( SUBJAREA , "NEUR" ) OR EXCLUDE ( SUBJAREA , "PHAR" ) OR EXCLUDE ( SUBJAREA , "VETE" ) OR EXCLUDE ( SUBJAREA , "PHYS" ) OR EXCLUDE ( SUBJAREA , "ECON" ) OR EXCLUDE ( SUBJAREA , "NURS" ) ) AND ( LIMIT-TO ( PUBSTAGE , "final" ) ) AND ( LIMI…	Scopus	The SCF E3 Ligase AtPP2-B11 Plays a Negative Role in Response to Drought Stress in Arabidopsis	Li et al., 2014: Li, Y., Jia, F., Yu, Y., Luo, L., Huang, J., Yang, G., Wu, C., Zheng, C.	Ubiquitination is a eukaryotic post-translational protein modification, implicated in various cellular processes in higher plants, and E3 ligases play an essential role in this cascade. In this study, we identified an Skp1–Cullin–F-box (SCF) E3 ligase encoding gene, Arabidopsis phloem protein 2-B11 (AtPP2-B11; At1g80110), by searching drought-responsive element in the promoter regions of 1,488 pu…	Rejected	no expression of DREB2
ALL ( dreb2 AND "drought stress" ) AND ( LIMIT-TO ( DOCTYPE , "ar" ) ) AND ( LIMIT-TO ( LANGUAGE , "English" ) ) AND ( EXCLUDE ( SUBJAREA , "MEDI" ) OR EXCLUDE ( SUBJAREA , "NEUR" ) OR EXCLUDE ( SUBJAREA , "PHAR" ) OR EXCLUDE ( SUBJAREA , "VETE" ) OR EXCLUDE ( SUBJAREA , "PHYS" ) OR EXCLUDE ( SUBJAREA , "ECON" ) OR EXCLUDE ( SUBJAREA , "NURS" ) ) AND ( LIMIT-TO ( PUBSTAGE , "final" ) ) AND ( LIMI…	Scopus	Bioinformatic identification and expression analysis of the Malus domestica DREB2 transcription factors in different tissues and abiotic stress	Li et al., 2017: Li, H., Zhao, Q., Sun, X., Jia, H., Ran, K.	DREB transcription factors regulate the expression of many abiotic-stress-responsive genes and play critical roles in improving abiotic stress tolerance in plants. In this study, the MdDREB2 transcription factors in apple (Malus domestica) were identified through bioinformatics approach, and MdFREB2 transcript levels in different tissues and abiotic stress conditions were also further studied usi…	Rejected	About apple
ALL ( dreb2 AND "drought stress" ) AND ( LIMIT-TO ( DOCTYPE , "ar" ) ) AND ( LIMIT-TO ( LANGUAGE , "English" ) ) AND ( EXCLUDE ( SUBJAREA , "MEDI" ) OR EXCLUDE ( SUBJAREA , "NEUR" ) OR EXCLUDE ( SUBJAREA , "PHAR" ) OR EXCLUDE ( SUBJAREA , "VETE" ) OR EXCLUDE ( SUBJAREA , "PHYS" ) OR EXCLUDE ( SUBJAREA , "ECON" ) OR EXCLUDE ( SUBJAREA , "NURS" ) ) AND ( LIMIT-TO ( PUBSTAGE , "final" ) ) AND ( LIMI…	Scopus	Genome-wide identification and expression profiling of DREB genes in Saccharum spontaneum	Li et al., 2021: Li, Z., Wang, G., Liu, X., Wang, Z., Zhang, M., Zhang, J.	The dehydration-responsive element-binding proteins (DREBs) are important transcription factors that interact with a DRE/CRT (C-repeat) sequence and involve in response to multiple abiotic stresses in plants. Modern sugarcane are hybrids from the cross between Saccharum spontaneum and Saccharum officinarum, and the high sugar content is considered to the attribution of S. officinaurm, while the s…	Rejected	no expression of DREB2
ALL ( dreb2 AND "drought stress" ) AND ( LIMIT-TO ( DOCTYPE , "ar" ) ) AND ( LIMIT-TO ( LANGUAGE , "English" ) ) AND ( EXCLUDE ( SUBJAREA , "MEDI" ) OR EXCLUDE ( SUBJAREA , "NEUR" ) OR EXCLUDE ( SUBJAREA , "PHAR" ) OR EXCLUDE ( SUBJAREA , "VETE" ) OR EXCLUDE ( SUBJAREA , "PHYS" ) OR EXCLUDE ( SUBJAREA , "ECON" ) OR EXCLUDE ( SUBJAREA , "NURS" ) ) AND ( LIMIT-TO ( PUBSTAGE , "final" ) ) AND ( LIMI…	Scopus	Genomic Survey and Cold-Induced Expression Patterns of bHLH Transcription Factors in Liriodendron chinense (Hemsl) Sarg.	Li et al., 2022: Li, R., Ahmad, B., Hwarari, D., Li, D., Lu, Y., Gao, M., Chen, J., Yang, L.	bHLH transcription factors play an animated role in the plant kingdom during growth and development, and responses to various abiotic stress. In this current study, we conducted, the genome-wide survey of bHLH transcription factors in Liriodendron chinense (Hemsl) Sarg., 91 LcbHLH family members were identified. Identified LcbHLH gene family members were grouped into 19 different subfamilies base…	Rejected	no expression of DREB2
ALL ( dreb2 AND "drought stress" ) AND ( LIMIT-TO ( DOCTYPE , "ar" ) ) AND ( LIMIT-TO ( LANGUAGE , "English" ) ) AND ( EXCLUDE ( SUBJAREA , "MEDI" ) OR EXCLUDE ( SUBJAREA , "NEUR" ) OR EXCLUDE ( SUBJAREA , "PHAR" ) OR EXCLUDE ( SUBJAREA , "VETE" ) OR EXCLUDE ( SUBJAREA , "PHYS" ) OR EXCLUDE ( SUBJAREA , "ECON" ) OR EXCLUDE ( SUBJAREA , "NURS" ) ) AND ( LIMIT-TO ( PUBSTAGE , "final" ) ) AND ( LIMI…	Scopus	Fine-tuning of SUMOylation modulates drought tolerance of apple	Li et al., 2022: Li, X., Zhou, S., Liu, Z., Lu, L., Dang, H., Li, H., Chu, B., Chen, P., Ma, Z., Zhao, S., Li, Z., van Nocker, S., Ma, F., Guan, Q.	SUMOylation is involved in various aspects of plant biology, including drought stress. However, the relationship between SUMOylation and drought stress tolerance is complex; whether SUMOylation has a crosstalk with ubiquitination in response to drought stress remains largely unclear. In this study, we found that both increased and decreased SUMOylation led to increased survival of apple (Malus × …	Rejected	About apple
ALL ( dreb2 AND "drought stress" ) AND ( LIMIT-TO ( DOCTYPE , "ar" ) ) AND ( LIMIT-TO ( LANGUAGE , "English" ) ) AND ( EXCLUDE ( SUBJAREA , "MEDI" ) OR EXCLUDE ( SUBJAREA , "NEUR" ) OR EXCLUDE ( SUBJAREA , "PHAR" ) OR EXCLUDE ( SUBJAREA , "VETE" ) OR EXCLUDE ( SUBJAREA , "PHYS" ) OR EXCLUDE ( SUBJAREA , "ECON" ) OR EXCLUDE ( SUBJAREA , "NURS" ) ) AND ( LIMIT-TO ( PUBSTAGE , "final" ) ) AND ( LIMI…	Scopus	Molecular characterization of the acquisition of longevity during seed maturation in soybean	Lima et al., 2017: Lima, J.J.P., Buitink, J., Lalanne, D., Rossi, R.F., Pelletier, S., Da Silva, E.A.A., Leprince, O.	Seed longevity, defined as the ability to remain alive during storage, is an important agronomic factor. Poor longevity negatively impacts seedling establishment and consequently crop yield. This is particularly problematic for soybean as seeds have a short lifespan. While the economic importance of soybean has fueled a large number of transcriptome studies during embryogenesis and seed filling, …	Rejected	no DREB2 expression
ALL ( dreb2 AND "drought stress" ) AND ( LIMIT-TO ( DOCTYPE , "ar" ) ) AND ( LIMIT-TO ( LANGUAGE , "English" ) ) AND ( EXCLUDE ( SUBJAREA , "MEDI" ) OR EXCLUDE ( SUBJAREA , "NEUR" ) OR EXCLUDE ( SUBJAREA , "PHAR" ) OR EXCLUDE ( SUBJAREA , "VETE" ) OR EXCLUDE ( SUBJAREA , "PHYS" ) OR EXCLUDE ( SUBJAREA , "ECON" ) OR EXCLUDE ( SUBJAREA , "NURS" ) ) AND ( LIMIT-TO ( PUBSTAGE , "final" ) ) AND ( LIMI…	Scopus	A novel drought-inducible gene, ATAF1, encodes a NAC family protein that negatively regulates the expression of stress-responsive genes in Arabidopsis	Lu et al., 2007: Lu, P.-L., Chen, N.-Z., An, R., Su, Z., Qi, B.-S., Ren, F., Chen, J., Wang, X.-C.	NAC proteins are plant-specific transcriptional regulators. ATAF1 was one of the first identified NAC proteins in Arabidopsis. In present study, we characterized the ATAF1 expression and biological function in response to water deficit stress. ATAF1 mRNA expression was strongly induced by dehydration and abscisic acid (ABA) treatment, but inhibited by water treatment, suggesting a general role in…	Rejected	no expression of DREB2
ALL ( dreb2 AND "drought stress" ) AND ( LIMIT-TO ( DOCTYPE , "ar" ) ) AND ( LIMIT-TO ( LANGUAGE , "English" ) ) AND ( EXCLUDE ( SUBJAREA , "MEDI" ) OR EXCLUDE ( SUBJAREA , "NEUR" ) OR EXCLUDE ( SUBJAREA , "PHAR" ) OR EXCLUDE ( SUBJAREA , "VETE" ) OR EXCLUDE ( SUBJAREA , "PHYS" ) OR EXCLUDE ( SUBJAREA , "ECON" ) OR EXCLUDE ( SUBJAREA , "NURS" ) ) AND ( LIMIT-TO ( PUBSTAGE , "final" ) ) AND ( LIMI…	Scopus	AmCBF1 Transcription Factor Regulates Plant Architecture by Repressing GhPP2C1 or GhPP2C2 in Gossypium hirsutum	Lu et al., 2022: Lu, J., Wang, L., Zhang, Q., Ma, C., Su, X., Cheng, H., Guo, H.	Dwarfism is a beneficial trait in many crops. Dwarf crops hold certain advantages over taller crops in lodging resistance, fertilizer tolerance, and yield. Overexpression of CBF/DREB transcription factors can lead to dwarfing in many plant species, but the molecular mechanism of plant dwarfing caused by overexpression of CBF/DREB in upland cotton (Gossypium hirsutum) remains unclear. In this stud…	Rejected	DREB1
ALL ( dreb2 AND "drought stress" ) AND ( LIMIT-TO ( DOCTYPE , "ar" ) ) AND ( LIMIT-TO ( LANGUAGE , "English" ) ) AND ( EXCLUDE ( SUBJAREA , "MEDI" ) OR EXCLUDE ( SUBJAREA , "NEUR" ) OR EXCLUDE ( SUBJAREA , "PHAR" ) OR EXCLUDE ( SUBJAREA , "VETE" ) OR EXCLUDE ( SUBJAREA , "PHYS" ) OR EXCLUDE ( SUBJAREA , "ECON" ) OR EXCLUDE ( SUBJAREA , "NURS" ) ) AND ( LIMIT-TO ( PUBSTAGE , "final" ) ) AND ( LIMI…	Scopus	GsZFP1, a new Cys2/His2-type zinc-finger protein, is a positive regulator of plant tolerance to cold and drought stress	Luo et al., 2012: Luo, X., Bai, X., Zhu, D., Li, Y., Ji, W., Cai, H., Wu, J., Liu, B., Zhu, Y.	Plant acclimation to environmental stress is controlled by a complex network of regulatory genes that compose distinct stress-response regulons. The C2H2-type zinc-finger proteins (ZFPs) have been implicated in different cellular processes involved in plant development and stress responses. Through microarray analysis, an alkaline (NaHCO 3)-responsive ZFP gene GsZFP1 was identified and subsequent…	Rejected	no expression of DREB2
ALL ( dreb2 AND "drought stress" ) AND ( LIMIT-TO ( DOCTYPE , "ar" ) ) AND ( LIMIT-TO ( LANGUAGE , "English" ) ) AND ( EXCLUDE ( SUBJAREA , "MEDI" ) OR EXCLUDE ( SUBJAREA , "NEUR" ) OR EXCLUDE ( SUBJAREA , "PHAR" ) OR EXCLUDE ( SUBJAREA , "VETE" ) OR EXCLUDE ( SUBJAREA , "PHYS" ) OR EXCLUDE ( SUBJAREA , "ECON" ) OR EXCLUDE ( SUBJAREA , "NURS" ) ) AND ( LIMIT-TO ( PUBSTAGE , "final" ) ) AND ( LIMI…	Scopus	The ABCISIC ACID INSENSITIVE (ABI) 4 Transcription Factor Is Stabilized by Stress, ABA and Phosphorylation	Maymon et al., 2022: Maymon, T., Eisner, N., Bar-Zvi, D.	The Arabidopsis transcription factor ABSCISIC ACID INSENSITIVE 4 (ABI4) is a key player in the plant hormone abscisic acid (ABA) signaling pathway and is involved in plant response to abiotic stress and development. Expression of the ABI4 gene is tightly regulated, with low basal expression. Maximal transcript levels occur during the seed maturation and early seed germination stages. Moreover, AB…	Rejected	no expression of DREB2
ALL ( dreb2 AND "drought stress" ) AND ( LIMIT-TO ( DOCTYPE , "ar" ) ) AND ( LIMIT-TO ( LANGUAGE , "English" ) ) AND ( EXCLUDE ( SUBJAREA , "MEDI" ) OR EXCLUDE ( SUBJAREA , "NEUR" ) OR EXCLUDE ( SUBJAREA , "PHAR" ) OR EXCLUDE ( SUBJAREA , "VETE" ) OR EXCLUDE ( SUBJAREA , "PHYS" ) OR EXCLUDE ( SUBJAREA , "ECON" ) OR EXCLUDE ( SUBJAREA , "NURS" ) ) AND ( LIMIT-TO ( PUBSTAGE , "final" ) ) AND ( LIMI…	Scopus	Exploring drought stress-regulated genes in senna (Cassia angustifolia Vahl.): a transcriptomic approach	Mehta et al., 2017: Mehta, R.H., Ponnuchamy, M., Kumar, J., Reddy, N.R.R.	De novo assembly of reads produced by next-generation sequencing (NGS) technologies offers a rapid approach to obtain expressed gene sequences for non-model organisms. Senna (Cassia angustifolia Vahl.) is a drought-tolerant annual undershrub of Caesalpiniaceae, a subfamily of Fabaceae. There are insufficient transcriptomic and genomic data in public databases for understanding the molecular mecha…	Rejected	no expression of DREB2
ALL ( dreb2 AND "drought stress" ) AND ( LIMIT-TO ( DOCTYPE , "ar" ) ) AND ( LIMIT-TO ( LANGUAGE , "English" ) ) AND ( EXCLUDE ( SUBJAREA , "MEDI" ) OR EXCLUDE ( SUBJAREA , "NEUR" ) OR EXCLUDE ( SUBJAREA , "PHAR" ) OR EXCLUDE ( SUBJAREA , "VETE" ) OR EXCLUDE ( SUBJAREA , "PHYS" ) OR EXCLUDE ( SUBJAREA , "ECON" ) OR EXCLUDE ( SUBJAREA , "NURS" ) ) AND ( LIMIT-TO ( PUBSTAGE , "final" ) ) AND ( LIMI…	Scopus	Allelic variants in durum wheat (Triticum turgidum L. var. durum) DREB genes conferring tolerance to abiotic stresses	Mondini et al., 2015: Mondini, L., Nachit, M.M., Pagnotta, M.A.	To identify potential and useful markers able to discriminate promising lines of durum wheat (Triticum turgidum L. var durum) tolerant to salt and drought stresses, nucleotide sequences of Dehydration-Responsive-Element Binding Factor (DREB) genes were used to design primers probed with High Resolution Melting technology for the identification of allelic variants. DREB1, DREB2, DREB3, DREB4 and D…	Rejected	no DREB2 expression
ALL ( dreb2 AND "drought stress" ) AND ( LIMIT-TO ( DOCTYPE , "ar" ) ) AND ( LIMIT-TO ( LANGUAGE , "English" ) ) AND ( EXCLUDE ( SUBJAREA , "MEDI" ) OR EXCLUDE ( SUBJAREA , "NEUR" ) OR EXCLUDE ( SUBJAREA , "PHAR" ) OR EXCLUDE ( SUBJAREA , "VETE" ) OR EXCLUDE ( SUBJAREA , "PHYS" ) OR EXCLUDE ( SUBJAREA , "ECON" ) OR EXCLUDE ( SUBJAREA , "NURS" ) ) AND ( LIMIT-TO ( PUBSTAGE , "final" ) ) AND ( LIMI…	Scopus	Alteration in expression level of some growth and stress-related genes after rhizobacteria inoculation to alleviate drought tolerance in sensitive rice genotype	Omar et al., 2021: Omar, S.A., Fetyan, N.A.H., Eldenary, M.E., Abdelfattah, M.H., Abd-Elhalim, H.M., Wrobel, J., Kalaji, H.M.	Drought stress is one of the major abiotic stresses that adversely affect rice production. Four rice genotypes, Giza177, IR64 (as sensitive genotypes) and Vandana, Orabi3 (as tolerant genotypes) were used to screen and characterize the soil microbes associated with each genotype under drought stress. Results: The soil microbes associated with the tolerant genotypes showed high drought tolerance a…	Rejected	no expression of DREB2
ALL ( dreb2 AND "drought stress" ) AND ( LIMIT-TO ( DOCTYPE , "ar" ) ) AND ( LIMIT-TO ( LANGUAGE , "English" ) ) AND ( EXCLUDE ( SUBJAREA , "MEDI" ) OR EXCLUDE ( SUBJAREA , "NEUR" ) OR EXCLUDE ( SUBJAREA , "PHAR" ) OR EXCLUDE ( SUBJAREA , "VETE" ) OR EXCLUDE ( SUBJAREA , "PHYS" ) OR EXCLUDE ( SUBJAREA , "ECON" ) OR EXCLUDE ( SUBJAREA , "NURS" ) ) AND ( LIMIT-TO ( PUBSTAGE , "final" ) ) AND ( LIMI…	Scopus	Monitoring expression profiles of Arabidopsis gene expression during rehydration process after dehydration using ca. 7000 full-length cDNA microarray	Oono et al., 2003: Oono, Y., Seki, M., Nanjo, T., Narusaka, M., Fujita, M., Satoh, R., Satou, M., Sakurai, T., Ishida, J., Akiyama, K., Iida, K., Maruyama, K., Satoh, S., Yamaguchi-Shinozaki, K., Shinozaki, K.	Plants respond and adapt to drought stress in order to survive under stress conditions. Several genes that respond to drought at the transcriptional level have been described, but there are few reports on genes involved in the recovery from dehydration. Analysis of rehydration-inducible genes should help not only to understand the molecular mechanisms of stress responses in higher plants, but als…	Rejected	no expression of DREB2
ALL ( dreb2 AND "drought stress" ) AND ( LIMIT-TO ( DOCTYPE , "ar" ) ) AND ( LIMIT-TO ( LANGUAGE , "English" ) ) AND ( EXCLUDE ( SUBJAREA , "MEDI" ) OR EXCLUDE ( SUBJAREA , "NEUR" ) OR EXCLUDE ( SUBJAREA , "PHAR" ) OR EXCLUDE ( SUBJAREA , "VETE" ) OR EXCLUDE ( SUBJAREA , "PHYS" ) OR EXCLUDE ( SUBJAREA , "ECON" ) OR EXCLUDE ( SUBJAREA , "NURS" ) ) AND ( LIMIT-TO ( PUBSTAGE , "final" ) ) AND ( LIMI…	Scopus	Stochasticity in transcriptional expression of a negative regulator of Arabidopsis ABA network	Pehlivan, N. 2019	Stably heritable spatiotemporal co/over-expression of distinct transcriptional regulators across generations is a desired target as they signal traffic in the cell. Here, the stability and expression pattern of AtHB7 (Arabidopsis homeodomain-leucine zipper class I) cDNA was characterized in 220 random population of transformed tomato clones where no AtHB7 orthologous has been identified in to dat…	Rejected	no expression of DREB2
ALL ( dreb2 AND "drought stress" ) AND ( LIMIT-TO ( DOCTYPE , "ar" ) ) AND ( LIMIT-TO ( LANGUAGE , "English" ) ) AND ( EXCLUDE ( SUBJAREA , "MEDI" ) OR EXCLUDE ( SUBJAREA , "NEUR" ) OR EXCLUDE ( SUBJAREA , "PHAR" ) OR EXCLUDE ( SUBJAREA , "VETE" ) OR EXCLUDE ( SUBJAREA , "PHYS" ) OR EXCLUDE ( SUBJAREA , "ECON" ) OR EXCLUDE ( SUBJAREA , "NURS" ) ) AND ( LIMIT-TO ( PUBSTAGE , "final" ) ) AND ( LIMI…	Scopus	WRKY1 regulates stomatal movement in drought-stressed Arabidopsis thaliana	Qiao et al., 2016: Qiao, Z., Li, C.-L., Zhang, W.	A key response of plants to moisture stress is stomatal closure, a process mediated by the phytohormone abscisic acid (ABA). Closure is affected by changes in the turgor of the stomatal guard cell. The transcription factor WRKY1 is a part of the regulatory machinery underlying stomatal movements, and through this, in the plant’s response to drought stress. The loss-of-function T-DNA insertion mut…	Rejected	no expression of DREB2
ALL ( dreb2 AND "drought stress" ) AND ( LIMIT-TO ( DOCTYPE , "ar" ) ) AND ( LIMIT-TO ( LANGUAGE , "English" ) ) AND ( EXCLUDE ( SUBJAREA , "MEDI" ) OR EXCLUDE ( SUBJAREA , "NEUR" ) OR EXCLUDE ( SUBJAREA , "PHAR" ) OR EXCLUDE ( SUBJAREA , "VETE" ) OR EXCLUDE ( SUBJAREA , "PHYS" ) OR EXCLUDE ( SUBJAREA , "ECON" ) OR EXCLUDE ( SUBJAREA , "NURS" ) ) AND ( LIMIT-TO ( PUBSTAGE , "final" ) ) AND ( LIMI…	Scopus	Genome-wide gene expression profiles analysis reveal novel insights into drought stress in foxtail millet (Setaria italica L.)	Qin et al., 2020: Qin, L., Chen, E., Li, F., Yu, X., Liu, Z., Yang, Y., Wang, R., Zhang, H., Wang, H., Liu, B., Guan, Y., Ruan, Y.	Foxtail millet (Setaria italica (L.) P. Beauv) is an important food and forage crop because of its health benefits and adaptation to drought stress; however, reports of transcriptomic analysis of genes responding to re-watering after drought stress in foxtail millet are rare. The present study evaluated physiological parameters, such as proline content, p5cs enzyme activity, anti-oxidation enzyme…	Rejected	no expression of DREB2
ALL ( dreb2 AND "drought stress" ) AND ( LIMIT-TO ( DOCTYPE , "ar" ) ) AND ( LIMIT-TO ( LANGUAGE , "English" ) ) AND ( EXCLUDE ( SUBJAREA , "MEDI" ) OR EXCLUDE ( SUBJAREA , "NEUR" ) OR EXCLUDE ( SUBJAREA , "PHAR" ) OR EXCLUDE ( SUBJAREA , "VETE" ) OR EXCLUDE ( SUBJAREA , "PHYS" ) OR EXCLUDE ( SUBJAREA , "ECON" ) OR EXCLUDE ( SUBJAREA , "NURS" ) ) AND ( LIMIT-TO ( PUBSTAGE , "final" ) ) AND ( LIMI…	Scopus	A method for testing drought tolerance in Fragaria based on fast screening for water deficit response and use of associated AFLP and EST candidate gene markers	Razavi et al., 2011: Razavi, F., De Keyser, E., De Riek, J., Van Labeke, M.C.	Drought stress is one of the most important environmental factors that limit plant growth and development, thus reducing yield. The objective of the present research was to correlate the genetic structure of different Fragaria genotypes, as assessed by Expressed Sequence Tag (EST) and Amplified Fragment Length Polymorphism (AFLP) markers, and plant responses to drought stress. Firstly, physiologi…	Rejected	no expression of DREB2
ALL ( dreb2 AND "drought stress" ) AND ( LIMIT-TO ( DOCTYPE , "ar" ) ) AND ( LIMIT-TO ( LANGUAGE , "English" ) ) AND ( EXCLUDE ( SUBJAREA , "MEDI" ) OR EXCLUDE ( SUBJAREA , "NEUR" ) OR EXCLUDE ( SUBJAREA , "PHAR" ) OR EXCLUDE ( SUBJAREA , "VETE" ) OR EXCLUDE ( SUBJAREA , "PHYS" ) OR EXCLUDE ( SUBJAREA , "ECON" ) OR EXCLUDE ( SUBJAREA , "NURS" ) ) AND ( LIMIT-TO ( PUBSTAGE , "final" ) ) AND ( LIMI…	Scopus	The combined effect of drought stress and heat shock on gene expression in tobacco	Rizhsky et al., 2002: Rizhsky, L., Liang, H., Mittler, R.	In nature, plants encounter a combination of environmental conditions that may include stresses such as drought or heat shock. Although drought and heat shock have been extensively studied, little is known about how their combination affect plants. We used cDNA arrays, coupled with physiological measurements, to study the effect of drought and heat shock on tobacco (Nicotiana tabacum) plants. A c…	Rejected	no expression of DREB2
ALL ( dreb2 AND "drought stress" ) AND ( LIMIT-TO ( DOCTYPE , "ar" ) ) AND ( LIMIT-TO ( LANGUAGE , "English" ) ) AND ( EXCLUDE ( SUBJAREA , "MEDI" ) OR EXCLUDE ( SUBJAREA , "NEUR" ) OR EXCLUDE ( SUBJAREA , "PHAR" ) OR EXCLUDE ( SUBJAREA , "VETE" ) OR EXCLUDE ( SUBJAREA , "PHYS" ) OR EXCLUDE ( SUBJAREA , "ECON" ) OR EXCLUDE ( SUBJAREA , "NURS" ) ) AND ( LIMIT-TO ( PUBSTAGE , "final" ) ) AND ( LIMI…	Scopus	Improving drought tolerance in mungbean (Vigna radiata l. wilczek): Morpho-physiological, biochemical and molecular perspectives	Singh et al., 2021: Singh, C.M., Singh, P., Tiwari, C., Purwar, S., Kumar, M., Pratap, A., Singh, S., Chugh, V., Mishra, A.K.	Drought stress is considered a severe threat to crop production. It adversely affects the morpho-physiological, biochemical and molecular functions of the plants, especially in short duration crops like mungbean. In the past few decades, significant progress has been made towards enhancing climate resilience in legumes through classical and next-generation breeding coupled with omics approaches. …	Rejected	review
ALL ( dreb2 AND "drought stress" ) AND ( LIMIT-TO ( DOCTYPE , "ar" ) ) AND ( LIMIT-TO ( LANGUAGE , "English" ) ) AND ( EXCLUDE ( SUBJAREA , "MEDI" ) OR EXCLUDE ( SUBJAREA , "NEUR" ) OR EXCLUDE ( SUBJAREA , "PHAR" ) OR EXCLUDE ( SUBJAREA , "VETE" ) OR EXCLUDE ( SUBJAREA , "PHYS" ) OR EXCLUDE ( SUBJAREA , "ECON" ) OR EXCLUDE ( SUBJAREA , "NURS" ) ) AND ( LIMIT-TO ( PUBSTAGE , "final" ) ) AND ( LIMI…	Scopus	Drought tolerance evaluation of tobacco plants transformed with different set of genes under laboratory and field conditions	Wang et al., 2015: Wang, Y., Dang, R., Li, J., Han, Y., Ding, N., Li, X., Jia, M., Li, Z., Wei, L., Jiang, J., Fan, Y., Li, B., Jia, W.	Although extensive studies have demonstrated that many drought-responsive genes confer drought tolerance to plants, comparisons of the drought tolerance capabilities conferred by different genes under various natural conditions have seldom been reported. We evaluated and compared the effects of two sets of transgenes, the drought-responsive genes (AtDREB1B and AtCBL1) and the root architecture-re…	Rejected	no DREB2 expression
ALL ( dreb2 AND "drought stress" ) AND ( LIMIT-TO ( DOCTYPE , "ar" ) ) AND ( LIMIT-TO ( LANGUAGE , "English" ) ) AND ( EXCLUDE ( SUBJAREA , "MEDI" ) OR EXCLUDE ( SUBJAREA , "NEUR" ) OR EXCLUDE ( SUBJAREA , "PHAR" ) OR EXCLUDE ( SUBJAREA , "VETE" ) OR EXCLUDE ( SUBJAREA , "PHYS" ) OR EXCLUDE ( SUBJAREA , "ECON" ) OR EXCLUDE ( SUBJAREA , "NURS" ) ) AND ( LIMIT-TO ( PUBSTAGE , "final" ) ) AND ( LIMI…	Scopus	CsATAF1 Positively Regulates Drought Stress Tolerance by an ABA-Dependent Pathway and by Promoting ROS Scavenging in Cucumber	Wang et al., 2018: Wang, J., Zhang, L., Cao, Y., Qi, C., Li, S., Liu, L., Wang, G., Mao, A., Ren, S., Guo, Y.-D.	The NAC transcription factors play vital roles in responding to drought stress in plants; however, the molecular mechanisms remain largely unknown in cucumber. Suppression of CsATAF1 via RNA interference (RNAi) weakened drought stress tolerance in cucumber due to a higher water loss rate in leaves, a higher level of hydrogen peroxide (H 2 O 2) and superoxide radicals (O 2 °'), increased malondial…	Rejected	no DREB2 expression in correlation with drought stress
ALL ( dreb2 AND "drought stress" ) AND ( LIMIT-TO ( DOCTYPE , "ar" ) ) AND ( LIMIT-TO ( LANGUAGE , "English" ) ) AND ( EXCLUDE ( SUBJAREA , "MEDI" ) OR EXCLUDE ( SUBJAREA , "NEUR" ) OR EXCLUDE ( SUBJAREA , "PHAR" ) OR EXCLUDE ( SUBJAREA , "VETE" ) OR EXCLUDE ( SUBJAREA , "PHYS" ) OR EXCLUDE ( SUBJAREA , "ECON" ) OR EXCLUDE ( SUBJAREA , "NURS" ) ) AND ( LIMIT-TO ( PUBSTAGE , "final" ) ) AND ( LIMI…	Scopus	Phosphoinositide-specific phospholipase C gene involved in heat and drought tolerance in wheat (Triticum aestivum L.)	Wang et al., 2021: Wang, X., Yao, X., Zhao, A., Yang, M., Zhao, W., LeTourneau, M.K., Dong, J., Gao, X.	Phosphoinositide-specific phospholipase C proteins mediate environmental stress responses in many plants. However, the potential of PI-PLC genes involved with abiotic stress tolerance in wheat remains un-explored. Objective: To study TaPLC1 genetic relation with wheat drought and heat resistance. Methods: The seedlings were treated with PI-PLC inhibitor U73122 at the single leaf stage. The seedli…	Rejected	no expression of DREB2
ALL ( dreb2 AND "drought stress" ) AND ( LIMIT-TO ( DOCTYPE , "ar" ) ) AND ( LIMIT-TO ( LANGUAGE , "English" ) ) AND ( EXCLUDE ( SUBJAREA , "MEDI" ) OR EXCLUDE ( SUBJAREA , "NEUR" ) OR EXCLUDE ( SUBJAREA , "PHAR" ) OR EXCLUDE ( SUBJAREA , "VETE" ) OR EXCLUDE ( SUBJAREA , "PHYS" ) OR EXCLUDE ( SUBJAREA , "ECON" ) OR EXCLUDE ( SUBJAREA , "NURS" ) ) AND ( LIMIT-TO ( PUBSTAGE , "final" ) ) AND ( LIMI…	Scopus	Overexpression of a tomato AP2/ERF transcription factor SlERF.B1 increases sensitivity to salt and drought stresses	Wang et al., 2022: Wang, Y., Xia, D., Li, W., Cao, X., Ma, F., Wang, Q., Zhan, X., Hu, T.	Ethylene response factors (ERFs) are unique to plants and play crucial roles in their response to various biotic and abiotic stresses, but the physiological and molecular mechanisms accounting for the functions of many ERF genes in abiotic stress are not well characterized in tomato. Here, an ERF gene, SlERF.B1 was characterized, which belongs to the IX subfamily of ERFs. SlERF.B1 expression was …	Rejected	no DREB2 expression
ALL ( dreb2 AND "drought stress" ) AND ( LIMIT-TO ( DOCTYPE , "ar" ) ) AND ( LIMIT-TO ( LANGUAGE , "English" ) ) AND ( EXCLUDE ( SUBJAREA , "MEDI" ) OR EXCLUDE ( SUBJAREA , "NEUR" ) OR EXCLUDE ( SUBJAREA , "PHAR" ) OR EXCLUDE ( SUBJAREA , "VETE" ) OR EXCLUDE ( SUBJAREA , "PHYS" ) OR EXCLUDE ( SUBJAREA , "ECON" ) OR EXCLUDE ( SUBJAREA , "NURS" ) ) AND ( LIMIT-TO ( PUBSTAGE , "final" ) ) AND ( LIMI…	Scopus	Ectopic expression of DREB transcription factor, AtDREB1A, confers tolerance to drought in transgenic salvia miltiorrhiza	Wei et al., 2016: Wei, T., Deng, K., Liu, D., Gao, Y., Liu, Y., Yang, M., Zhang, L., Zheng, X., Wang, C., Song, W., Chen, C., Zhang, Y.	Drought decreases crop productivity more than any other type of environmental stress. Transcription factors (TFs) play crucial roles in regulating plant abiotic stress responses. The Arabidopsis thaliana gene DREB1A/CBF3, encoding a stress-inducible TF, was introduced into Salvia miltiorrhiza. Ectopic expression of AtDREB1A resulted in increased drought tolerance, and transgenic lines had higher …	Rejected	no expression of DREB2
ALL ( dreb2 AND "drought stress" ) AND ( LIMIT-TO ( DOCTYPE , "ar" ) ) AND ( LIMIT-TO ( LANGUAGE , "English" ) ) AND ( EXCLUDE ( SUBJAREA , "MEDI" ) OR EXCLUDE ( SUBJAREA , "NEUR" ) OR EXCLUDE ( SUBJAREA , "PHAR" ) OR EXCLUDE ( SUBJAREA , "VETE" ) OR EXCLUDE ( SUBJAREA , "PHYS" ) OR EXCLUDE ( SUBJAREA , "ECON" ) OR EXCLUDE ( SUBJAREA , "NURS" ) ) AND ( LIMIT-TO ( PUBSTAGE , "final" ) ) AND ( LIMI…	Scopus	Transcriptome Reveals Differentially Expressed Genes in Saccharum spontaneum GX83-10 Leaf Under Drought Stress	Wu et al., 2018: Wu, K.-C., Wei, L.-P., Huang, C.-M., Wei, Y.-W., Cao, H.-Q., Xu, L., Luo, H.-B., Jiang, S.-L., Deng, Z.-N., Li, Y.-R.	Saccharum spontaneum is the most important and widely used wild germplasm in sugarcane resistance breeding, which can improve sugarcane resistance and ratoon capacity. In order to further exploit and utilize the resistance genes in S. spontaneum, we used a new generation of sequencing technology Illumina HiSeq high-throughput platform to analyze the expression profile of transcriptome genes in S.…	Rejected	no expression of DREB2
ALL ( dreb2 AND "drought stress" ) AND ( LIMIT-TO ( DOCTYPE , "ar" ) ) AND ( LIMIT-TO ( LANGUAGE , "English" ) ) AND ( EXCLUDE ( SUBJAREA , "MEDI" ) OR EXCLUDE ( SUBJAREA , "NEUR" ) OR EXCLUDE ( SUBJAREA , "PHAR" ) OR EXCLUDE ( SUBJAREA , "VETE" ) OR EXCLUDE ( SUBJAREA , "PHYS" ) OR EXCLUDE ( SUBJAREA , "ECON" ) OR EXCLUDE ( SUBJAREA , "NURS" ) ) AND ( LIMIT-TO ( PUBSTAGE , "final" ) ) AND ( LIMI…	Scopus	Characterization of the transcriptional profiles in common buckwheat (Fagopyrum esculentum) under PEG-mediated drought stress	Wu et al., 2019: Wu, Q., Zhao, G., Bai, X., Zhao, W., Xiang, D., Wan, Y., Wu, X., Sun, Y., Tan, M., Peng, L., Zhao, J.	Common buckwheat (Fagopyrum esculentum) is an important staple food crop in southwest China, where drought stress is one of the largest limiting factors that lead to decreased crop production. To reveal the molecular mechanism of common buckwheat in response to drought stress, we performed a comprehensive transcriptomics study to evaluate gene expression profiles of common buckwheat during PEG-me…	Rejected	no DREB2 expression
ALL ( dreb2 AND "drought stress" ) AND ( LIMIT-TO ( DOCTYPE , "ar" ) ) AND ( LIMIT-TO ( LANGUAGE , "English" ) ) AND ( EXCLUDE ( SUBJAREA , "MEDI" ) OR EXCLUDE ( SUBJAREA , "NEUR" ) OR EXCLUDE ( SUBJAREA , "PHAR" ) OR EXCLUDE ( SUBJAREA , "VETE" ) OR EXCLUDE ( SUBJAREA , "PHYS" ) OR EXCLUDE ( SUBJAREA , "ECON" ) OR EXCLUDE ( SUBJAREA , "NURS" ) ) AND ( LIMIT-TO ( PUBSTAGE , "final" ) ) AND ( LIMI…	Scopus	Effects of Chilling Stress on Morphological, Physiological, and Biochemical Attributes of Silage Corn Genotypes During Seedling Establishment	Wu et al., 2022: Wu, J., Nadeem, M., Galagedara, L., Thomas, R., Cheema, M.	Chilling stress is one of the major abiotic stresses which hinder seedling emergence and growth. Herein, we investigated the effects of chilling/low temperature stress on the morphological, physiological, and biochemical attributes of two silage corn genotypes during the seedling establishment phase. The experiment was conducted in a growth chamber, and silage corn seedlings of Yukon‐R and A4177G…	Rejected	no expression of DREB2
ALL ( dreb2 AND "drought stress" ) AND ( LIMIT-TO ( DOCTYPE , "ar" ) ) AND ( LIMIT-TO ( LANGUAGE , "English" ) ) AND ( EXCLUDE ( SUBJAREA , "MEDI" ) OR EXCLUDE ( SUBJAREA , "NEUR" ) OR EXCLUDE ( SUBJAREA , "PHAR" ) OR EXCLUDE ( SUBJAREA , "VETE" ) OR EXCLUDE ( SUBJAREA , "PHYS" ) OR EXCLUDE ( SUBJAREA , "ECON" ) OR EXCLUDE ( SUBJAREA , "NURS" ) ) AND ( LIMIT-TO ( PUBSTAGE , "final" ) ) AND ( LIMI…	Scopus	CaFtsH06, a novel filamentous thermosensitive protease gene, is involved in heat, salt and drought stress tolerance of pepper (Capsicum annuum L.)	Xiao et al., 2021: Xiao, J.-J., Zhang, R.-X., Khan, A., Ul Haq, S., Gai, W.-X., Gong, Z.-H.	Harsh environmental factors have continuous negative effects on plant growth and development, leading to metabolic disruption and reduced plant productivity and quality. However, filamentation temperature‐sensitive H protease (FtsH) plays a prominent role in helping plants to cope with these negative impacts. In the current study, we examined the transcriptional regulation of the CaFtsH06 gene in…	Rejected	no DREB2 expression in correlation with drought stress
ALL ( dreb2 AND "drought stress" ) AND ( LIMIT-TO ( DOCTYPE , "ar" ) ) AND ( LIMIT-TO ( LANGUAGE , "English" ) ) AND ( EXCLUDE ( SUBJAREA , "MEDI" ) OR EXCLUDE ( SUBJAREA , "NEUR" ) OR EXCLUDE ( SUBJAREA , "PHAR" ) OR EXCLUDE ( SUBJAREA , "VETE" ) OR EXCLUDE ( SUBJAREA , "PHYS" ) OR EXCLUDE ( SUBJAREA , "ECON" ) OR EXCLUDE ( SUBJAREA , "NURS" ) ) AND ( LIMIT-TO ( PUBSTAGE , "final" ) ) AND ( LIMI…	Scopus	Modulation of Abscisic Acid Signal Transduction and Biosynthesis by an Sm-like Protein in Arabidopsis	Xiong et al., 2001: Xiong, L., Gong, Z., Rock, C.D., Subramanian, S., Guo, Y., Xu, W., Galbraith, D., Zhu, J.-K.	The phytohormone abscisic acid (ABA) regulates plant growth and development as well as stress tolerance. The Arabidopsis sad1 (supersensitive to ABA and drought) mutation increases plant sensitivity to drought stress and ABA in seed germination, root growth, and the expression of some stress-responsive genes. sad1 plants are also defective in the positive feedback regulation of ABA biosynthesis g…	Rejected	no expression of DREB2
ALL ( dreb2 AND "drought stress" ) AND ( LIMIT-TO ( DOCTYPE , "ar" ) ) AND ( LIMIT-TO ( LANGUAGE , "English" ) ) AND ( EXCLUDE ( SUBJAREA , "MEDI" ) OR EXCLUDE ( SUBJAREA , "NEUR" ) OR EXCLUDE ( SUBJAREA , "PHAR" ) OR EXCLUDE ( SUBJAREA , "VETE" ) OR EXCLUDE ( SUBJAREA , "PHYS" ) OR EXCLUDE ( SUBJAREA , "ECON" ) OR EXCLUDE ( SUBJAREA , "NURS" ) ) AND ( LIMIT-TO ( PUBSTAGE , "final" ) ) AND ( LIMI…	Scopus	Ectopic overexpression of the aldehyde dehydrogenase ALDH21 from Syntrichia caninervis in tobacco confers salt and drought stress tolerance	Yang et al., 2015: Yang, H., Zhang, D., Li, H., Dong, L., Lan, H.	Aldehyde dehydrogenases are important enzymes that play vital roles in mitigating oxidative/electrophilic stress when plants are exposed to environmental stress. An aldehyde dehydrogenase gene from Syntrichia caninervis, ScALDH21, was introduced into tobacco using Agrobacterium-mediated transformation to generate ScALDH21-overexpressing tobacco plants to investigate its effect on drought and salt…	Rejected	No fold change of DREB2
ALL ( dreb2 AND "drought stress" ) AND ( LIMIT-TO ( DOCTYPE , "ar" ) ) AND ( LIMIT-TO ( LANGUAGE , "English" ) ) AND ( EXCLUDE ( SUBJAREA , "MEDI" ) OR EXCLUDE ( SUBJAREA , "NEUR" ) OR EXCLUDE ( SUBJAREA , "PHAR" ) OR EXCLUDE ( SUBJAREA , "VETE" ) OR EXCLUDE ( SUBJAREA , "PHYS" ) OR EXCLUDE ( SUBJAREA , "ECON" ) OR EXCLUDE ( SUBJAREA , "NURS" ) ) AND ( LIMIT-TO ( PUBSTAGE , "final" ) ) AND ( LIMI…	Scopus	Over-expression of TsCBF1 gene confers improved drought tolerance in transgenic maize	Zhang et al., 2010: Zhang, S., Li, N., Gao, F., Yang, A., Zhang, J.	The DREB/CBF transcription factors play important roles during low temperature, drought, and high-salt stress in higher plants. In this paper, we transferred TsCBF1 gene from a dicotyledonous halophyte Thellungiella halophila into the monocotyledonous crop maize (Zea mays L.). PCR, Southern blot, and RT-PCR analysis indicated that the TsCBF1 gene had been integrated into the genome of transgenic …	Rejected	No fold change of DREB2
ALL ( dreb2 AND "drought stress" ) AND ( LIMIT-TO ( DOCTYPE , "ar" ) ) AND ( LIMIT-TO ( LANGUAGE , "English" ) ) AND ( EXCLUDE ( SUBJAREA , "MEDI" ) OR EXCLUDE ( SUBJAREA , "NEUR" ) OR EXCLUDE ( SUBJAREA , "PHAR" ) OR EXCLUDE ( SUBJAREA , "VETE" ) OR EXCLUDE ( SUBJAREA , "PHYS" ) OR EXCLUDE ( SUBJAREA , "ECON" ) OR EXCLUDE ( SUBJAREA , "NURS" ) ) AND ( LIMIT-TO ( PUBSTAGE , "final" ) ) AND ( LIMI…	Scopus	A CkDREB1 gene isolated from Caragana korshinskii Kom. enhances Arabidopsis drought and cold tolerance	Zhang et al., 2019: Zhang, Z., Yang, Q., Zhang, C., Wei, L., Yue, R., Li, G., Lin, X., Wang, R.	Caragana korshinskii Kom., an arbuscular legume with important economic and ecological value in feed, processing industry, and environmental protection, also has great tolerance potential to abiotic stress conditions. An AP2 domain-containing gene was isolated from the suppression subtractive hybridization library of C. korshinskii under drought stress. In addition, the isolated gene was also fou…	Rejected	No fold change of DREB2
ALL ( dreb2 AND "drought stress" ) AND ( LIMIT-TO ( DOCTYPE , "ar" ) ) AND ( LIMIT-TO ( LANGUAGE , "English" ) ) AND ( EXCLUDE ( SUBJAREA , "MEDI" ) OR EXCLUDE ( SUBJAREA , "NEUR" ) OR EXCLUDE ( SUBJAREA , "PHAR" ) OR EXCLUDE ( SUBJAREA , "VETE" ) OR EXCLUDE ( SUBJAREA , "PHYS" ) OR EXCLUDE ( SUBJAREA , "ECON" ) OR EXCLUDE ( SUBJAREA , "NURS" ) ) AND ( LIMIT-TO ( PUBSTAGE , "final" ) ) AND ( LIMI…	Scopus	Arabidopsis DREB1A/CBF3 bestowed transgenic tall fescue increased tolerance to drought stress	Zhao et al., 2007: Zhao, J., Ren, W., Zhi, D., Wang, L., Xia, G.	in order to improve drought tolerance of tall fescue (Festuca arundinacea Schreb.), an important perennial cool-season grass, we introduced Arabidopsis DREB1A/CBF3 driven by the inducible rd29A promoter into tall fescue mediated by Agrobacterium tumefaciens strains AGL1. PCR and Southern blot analysis confirmed that DREB1A/CBF3 gene had been integrated into the genome of tall fescue. AtDREB1A gen…	Rejected	No fold change of DREB2
ALL ( dreb2 AND "drought stress" ) AND ( LIMIT-TO ( DOCTYPE , "ar" ) ) AND ( LIMIT-TO ( LANGUAGE , "English" ) ) AND ( EXCLUDE ( SUBJAREA , "MEDI" ) OR EXCLUDE ( SUBJAREA , "NEUR" ) OR EXCLUDE ( SUBJAREA , "PHAR" ) OR EXCLUDE ( SUBJAREA , "VETE" ) OR EXCLUDE ( SUBJAREA , "PHYS" ) OR EXCLUDE ( SUBJAREA , "ECON" ) OR EXCLUDE ( SUBJAREA , "NURS" ) ) AND ( LIMIT-TO ( PUBSTAGE , "final" ) ) AND ( LIMI…	Scopus	A MYB-related transcription factor from sheepgrass, LcMYB2, promotes seed germination and root growth under drought stress	Zhao et al., 2019: Zhao, P., Hou, S., Guo, X., Jia, J., Yang, W., Liu, Z., Chen, S., Li, X., Qi, D., Liu, G., Cheng, L.	Drought is one of the most serious factors limiting plant growth and production. Sheepgrass can adapt well to various adverse conditions, including drought. However, during germination, sheepgrass young seedlings are sensitive to these adverse conditions. Therefore, the adaptability of seedlings is very important for plant survival, especially in plants that inhabit grasslands or the construction…	Rejected	No fold change of DREB2
ALL ( dreb2 AND "drought stress" ) AND ( LIMIT-TO ( DOCTYPE , "ar" ) ) AND ( LIMIT-TO ( LANGUAGE , "English" ) ) AND ( EXCLUDE ( SUBJAREA , "MEDI" ) OR EXCLUDE ( SUBJAREA , "NEUR" ) OR EXCLUDE ( SUBJAREA , "PHAR" ) OR EXCLUDE ( SUBJAREA , "VETE" ) OR EXCLUDE ( SUBJAREA , "PHYS" ) OR EXCLUDE ( SUBJAREA , "ECON" ) OR EXCLUDE ( SUBJAREA , "NURS" ) ) AND ( LIMIT-TO ( PUBSTAGE , "final" ) ) AND ( LIMI…	Scopus	Transcriptional profiling analysis of OsDT11-mediated ABA-dependent signal pathway for drought tolerance in rice	Zhao et al., 2020: Zhao, M., Ju, Y., Zhao, B., Li, X., Dai, L.I., Qu, J., Chu, Z., Ding, X.	Small cysteine-rich peptides (CRPs) are important in plant responses to biotic and abiotic stresses. OsDT11, encoding an 88 amino acid CRP-type protein, has been reported to enhance tolerance to drought in rice (Oryza sativa L.) without negatively affecting other agronomic traits. However, the molecular mechanisms of OsDT11-mediated drought tolerance are still unclear. Here, we performed RNA-Seq …	Rejected	No fold change of DREB2
ALL ( dreb2 AND "drought stress" ) AND ( LIMIT-TO ( DOCTYPE , "ar" ) ) AND ( LIMIT-TO ( LANGUAGE , "English" ) ) AND ( EXCLUDE ( SUBJAREA , "MEDI" ) OR EXCLUDE ( SUBJAREA , "NEUR" ) OR EXCLUDE ( SUBJAREA , "PHAR" ) OR EXCLUDE ( SUBJAREA , "VETE" ) OR EXCLUDE ( SUBJAREA , "PHYS" ) OR EXCLUDE ( SUBJAREA , "ECON" ) OR EXCLUDE ( SUBJAREA , "NURS" ) ) AND ( LIMIT-TO ( PUBSTAGE , "final" ) ) AND ( LIMI…	Scopus	Genome-wide analysis of the heat shock transcription factor gene family in Sorbus pohuashanensis (Hance) Hedl identifies potential candidates for resistance to abiotic stresses	Zhao et al., 2022: Zhao, D., Qi, X., Zhang, Y., Zhang, R., Wang, C., Sun, T., Zheng, J., Lu, Y.	Heat shock transcription factors (Hsfs) are essential regulators of plant responses to abiotic stresses, growth, and development. However, all the Hsf family members have not been identified in Sorbus pohuashanensis. Therefore, the aim of this study was to identify the Hsf family members in S. pohuashanensis and examine their expression under abiotic stress conditions through the integration of g…	Rejected	No fold change of DREB2
ALL ( dreb2 AND "drought stress" ) AND ( LIMIT-TO ( DOCTYPE , "ar" ) ) AND ( LIMIT-TO ( LANGUAGE , "English" ) ) AND ( EXCLUDE ( SUBJAREA , "MEDI" ) OR EXCLUDE ( SUBJAREA , "NEUR" ) OR EXCLUDE ( SUBJAREA , "PHAR" ) OR EXCLUDE ( SUBJAREA , "VETE" ) OR EXCLUDE ( SUBJAREA , "PHYS" ) OR EXCLUDE ( SUBJAREA , "ECON" ) OR EXCLUDE ( SUBJAREA , "NURS" ) ) AND ( LIMIT-TO ( PUBSTAGE , "final" ) ) AND ( LIMI…	Scopus	Genome-wide investigation of AP2/ERF gene family in the desert legume Eremosparton songoricum: Identification, classification, evolution, and expression profiling under drought stress	Zhao et al., 2022: Zhao, M., Haxim, Y., Liang, Y., Qiao, S., Gao, B., Zhang, D., Li, X.	Eremosparton songoricum (Litv.) Vass. is a rare leafless legume shrub endemic to central Asia which grows on bare sand. It shows extreme drought tolerance and is being developed as a model organism for investigating morphological, physiological, and molecular adaptations to harsh desert environments. APETALA2/Ethylene Responsive Factor (AP2/ERF) is a large plant transcription factor family that p…	Rejected	no expression of DREB2
ALL ( dreb2 AND "drought stress" ) AND ( LIMIT-TO ( DOCTYPE , "ar" ) ) AND ( LIMIT-TO ( LANGUAGE , "English" ) ) AND ( EXCLUDE ( SUBJAREA , "MEDI" ) OR EXCLUDE ( SUBJAREA , "NEUR" ) OR EXCLUDE ( SUBJAREA , "PHAR" ) OR EXCLUDE ( SUBJAREA , "VETE" ) OR EXCLUDE ( SUBJAREA , "PHYS" ) OR EXCLUDE ( SUBJAREA , "ECON" ) OR EXCLUDE ( SUBJAREA , "NURS" ) ) AND ( LIMIT-TO ( PUBSTAGE , "final" ) ) AND ( LIMI…	Scopus	Characterization of gene expression associated with drought avoidance and tolerance traits in a perennial grass species	Zhou et al., 2014: Zhou, P., An, Y., Wang, Z., Du, H., Huang, B.	To understand molecular mechanisms of perennial grass adaptation to drought stress, genes associated with drought avoidance or tolerance traits were identified and their expression patterns were characterized in C4 hybrid bermudagrass [Cynodon dactylon (L.) Pers.6C. transvaalensis Burtt Davy, cv. Tifway] and common bermudagrass (C. dactylon, cv. C299). Plants of drought-tolerant 'Tifway' and drou…	Rejected	no expression of DREB2
ALL ( dreb2 AND "drought stress" ) AND ( LIMIT-TO ( DOCTYPE , "ar" ) ) AND ( LIMIT-TO ( LANGUAGE , "English" ) ) AND ( EXCLUDE ( SUBJAREA , "MEDI" ) OR EXCLUDE ( SUBJAREA , "NEUR" ) OR EXCLUDE ( SUBJAREA , "PHAR" ) OR EXCLUDE ( SUBJAREA , "VETE" ) OR EXCLUDE ( SUBJAREA , "PHYS" ) OR EXCLUDE ( SUBJAREA , "ECON" ) OR EXCLUDE ( SUBJAREA , "NURS" ) ) AND ( LIMIT-TO ( PUBSTAGE , "final" ) ) AND ( LIMI…	Scopus	Genome-wide analysis of the soybean DREB gene family: Identification, genomic organization and expression profiles in response to drought stress	Zhou et al., 2020: Zhou, Y., Zhou, W., Liu, H., Liu, P., Li, Z.	DREB transcription factors regulate the expression of stress-responsive genes, and thus play an important role in plant stress response to abiotic stresses. To obtain a global expression profile of soybean DREB genes under drought stress, we first explored the soybean genome to identify DREB family genes, and then analysed a set of transcriptome data of drought stress to verify their involvement …	Rejected	no DREB2 expression
ALL ( dreb2 AND "drought stress" ) AND ( LIMIT-TO ( DOCTYPE , "ar" ) ) AND ( LIMIT-TO ( LANGUAGE , "English" ) ) AND ( EXCLUDE ( SUBJAREA , "MEDI" ) OR EXCLUDE ( SUBJAREA , "NEUR" ) OR EXCLUDE ( SUBJAREA , "PHAR" ) OR EXCLUDE ( SUBJAREA , "VETE" ) OR EXCLUDE ( SUBJAREA , "PHYS" ) OR EXCLUDE ( SUBJAREA , "ECON" ) OR EXCLUDE ( SUBJAREA , "NURS" ) ) AND ( LIMIT-TO ( PUBSTAGE , "final" ) ) AND ( LIMI…	Scopus	Overexpression of ZmEREBP60 enhances drought tolerance in maize	Zhu et al., 2022: Zhu, Y., Liu, Y., Zhou, K., Tian, C., Aslam, M., Zhang, B., Liu, W., Zou, H.	Apetala2/ethylene response factor (AP2/ERF) family of transcription factors plays important roles in plant development and stress responses. However, few members of this family have been functionally and mechanistically characterised in maize. In this study, we characterised a member of the AP2/ERF transcription factor family, ZmEREBP60 from maize. Amino acid sequence alignment and phylogenetic a…	Rejected	no expression of DREB2
ALL ( dreb2 AND "drought stress" ) AND ( LIMIT-TO ( DOCTYPE , "ar" ) ) AND ( LIMIT-TO ( LANGUAGE , "English" ) ) AND ( EXCLUDE ( SUBJAREA , "MEDI" ) OR EXCLUDE ( SUBJAREA , "NEUR" ) OR EXCLUDE ( SUBJAREA , "PHAR" ) OR EXCLUDE ( SUBJAREA , "VETE" ) OR EXCLUDE ( SUBJAREA , "PHYS" ) OR EXCLUDE ( SUBJAREA , "ECON" ) OR EXCLUDE ( SUBJAREA , "NURS" ) ) AND ( LIMIT-TO ( PUBSTAGE , "final" ) ) AND ( LIMI…	Scopus	A novel calcium-dependent protein kinase gene from Populus euphratica, confers both drought and cold stress tolerance	Chen et al., 2013: Chen, J., Xue, B., Xia, X., Yin, W.	Populus species are the most important timber trees over the Northern hemisphere. Most of them are cold- and drought-sensitive except the Populus euphratica Oliv. Here, a calcium-dependent protein kinase (CDPK) gene cloned from P. euphratica, designated as PeCPK10, was rapidly induced by salt, cold, and drought stresses. The protein encoded by PeCPK10 was localized within the nucleus and cytosol,…	Rejected	Populus euphratica
ALL ( dreb2 AND "drought stress" ) AND ( LIMIT-TO ( DOCTYPE , "ar" ) ) AND ( LIMIT-TO ( LANGUAGE , "English" ) ) AND ( EXCLUDE ( SUBJAREA , "MEDI" ) OR EXCLUDE ( SUBJAREA , "NEUR" ) OR EXCLUDE ( SUBJAREA , "PHAR" ) OR EXCLUDE ( SUBJAREA , "VETE" ) OR EXCLUDE ( SUBJAREA , "PHYS" ) OR EXCLUDE ( SUBJAREA , "ECON" ) OR EXCLUDE ( SUBJAREA , "NURS" ) ) AND ( LIMIT-TO ( PUBSTAGE , "final" ) ) AND ( LIMI…	Scopus	Microarray analysis of transcriptional responses to salt and drought stress in Arabidopsis thaliana	Ghorbani et al., 2019: Ghorbani, R., Alemzadeh, A., Razi, H.	Microarray expression profile analysis is a useful approach to increase our knowledge about genes involved in regulatory networks and signal transduction pathways related to abiotic stress tolerance. Salt and drought, as two important abiotic stresses, adversely affect plant productivity in the world every year. To understand stress response mechanisms and identify genes and proteins which play c…	Rejected	no DREB2 expression
ALL ( dreb2 AND "drought stress" ) AND ( LIMIT-TO ( DOCTYPE , "ar" ) ) AND ( LIMIT-TO ( LANGUAGE , "English" ) ) AND ( EXCLUDE ( SUBJAREA , "MEDI" ) OR EXCLUDE ( SUBJAREA , "NEUR" ) OR EXCLUDE ( SUBJAREA , "PHAR" ) OR EXCLUDE ( SUBJAREA , "VETE" ) OR EXCLUDE ( SUBJAREA , "PHYS" ) OR EXCLUDE ( SUBJAREA , "ECON" ) OR EXCLUDE ( SUBJAREA , "NURS" ) ) AND ( LIMIT-TO ( PUBSTAGE , "final" ) ) AND ( LIMI…	Scopus	Lipid transfer protein 3 as a target of MYB96 mediates freezing and drought stress in Arabidopsis	Guo et al., 2013: Guo, L., Yang, H., Zhang, X., Yang, S.	Several lipid-transfer proteins were reported to modulate the plant response to biotic stress; however, whether lipid-transfer proteins are also involved in abiotic stress remains unknown. This study characterized the function of a lipid-transfer protein, LTP3, during freezing and drought stress. LTP3 was expressed ubiquitously and the LTP3 protein was localized to the cytoplasm. A biochemical st…	Rejected	no DREB2 expression
ALL ( dreb2 AND "drought stress" ) AND ( LIMIT-TO ( DOCTYPE , "ar" ) ) AND ( LIMIT-TO ( LANGUAGE , "English" ) ) AND ( EXCLUDE ( SUBJAREA , "MEDI" ) OR EXCLUDE ( SUBJAREA , "NEUR" ) OR EXCLUDE ( SUBJAREA , "PHAR" ) OR EXCLUDE ( SUBJAREA , "VETE" ) OR EXCLUDE ( SUBJAREA , "PHYS" ) OR EXCLUDE ( SUBJAREA , "ECON" ) OR EXCLUDE ( SUBJAREA , "NURS" ) ) AND ( LIMIT-TO ( PUBSTAGE , "final" ) ) AND ( LIMI…	Scopus	A novel gene of Kalanchoe daigremontiana confers plant drought resistanc	Wang et al., 2018: Wang, L., Zhu, C., Jin, L., Xiao, A., Duan, J., Ma, L.	Kalanchoe (K.) daigremontiana is important for studying asexual reproduction under different environmental conditions. Here, we describe a novel KdNOVEL41 (KdN41) gene that may confer drought resistance and could thereby affect K. daigremontiana development. The detected subcellular localization of a KdN41/Yellow Fluorescent Protein (YFP) fusion protein was in the nucleus and cell membrane. Droug…	Rejected	no expression of DREB2
ALL ( dreb2 AND "drought stress" ) AND ( LIMIT-TO ( DOCTYPE , "ar" ) ) AND ( LIMIT-TO ( LANGUAGE , "English" ) ) AND ( EXCLUDE ( SUBJAREA , "MEDI" ) OR EXCLUDE ( SUBJAREA , "NEUR" ) OR EXCLUDE ( SUBJAREA , "PHAR" ) OR EXCLUDE ( SUBJAREA , "VETE" ) OR EXCLUDE ( SUBJAREA , "PHYS" ) OR EXCLUDE ( SUBJAREA , "ECON" ) OR EXCLUDE ( SUBJAREA , "NURS" ) ) AND ( LIMIT-TO ( PUBSTAGE , "final" ) ) AND ( LIMI…	Scopus	Dehydration-Responsive Element Binding Protein 1C, 1E, and 1G Promote Stress Tolerance to Chilling, Heat, Drought, and Salt in Rice	Wang et al., 2022: Wang, H., Lu, S., Guan, X., Jiang, Y., Wang, B., Hua, J., Zou, B.	The dehydration-responsive element binding protein 1 (DREB1)/C-repeat-binding factor (CBF) genes are key regulators of cold acclimation and freezing tolerance in the chilling tolerant Arabidopsis thaliana. Here, we investigated the function of three members of the 10 rice DREB1 genes, OsDREB1C, E, and G, in the chilling sensitive rice plants. Their loss of function (LOF) mutants were each more ch…	Rejected
ALL ( dreb2 AND "drought stress" ) AND ( LIMIT-TO ( DOCTYPE , "ar" ) ) AND ( LIMIT-TO ( LANGUAGE , "English" ) ) AND ( EXCLUDE ( SUBJAREA , "MEDI" ) OR EXCLUDE ( SUBJAREA , "NEUR" ) OR EXCLUDE ( SUBJAREA , "PHAR" ) OR EXCLUDE ( SUBJAREA , "VETE" ) OR EXCLUDE ( SUBJAREA , "PHYS" ) OR EXCLUDE ( SUBJAREA , "ECON" ) OR EXCLUDE ( SUBJAREA , "NURS" ) ) AND ( LIMIT-TO ( PUBSTAGE , "final" ) ) AND ( LIMI…	Scopus	Genome-wide analysis of the DREB family genes and functional identification of the involvement of BrDREB2B in abiotic stress in wucai (Brassica campestris L.)	Wu et al., 2022: Wu, Y., Zhang, L., Nie, L., Zheng, Y., Zhu, S., Hou, J., Li, R., Chen, G., Tang, X., Wang, C., Yuan, L.	Dehydration responsive element binding protein (DREB) is a significant transcription factor class known to be implicated in abiotic stresses. In this study, we systematically conducted a genome-wide identification and expression analysis of the DREB gene family, including gene structures, evolutionary relationships, chromosome distribution, conserved domains, and expression patterns. A total of 6…	Rejected	no DREB2 expression
ALL ( dreb2 AND "drought stress" ) AND ( LIMIT-TO ( DOCTYPE , "ar" ) ) AND ( LIMIT-TO ( LANGUAGE , "English" ) ) AND ( EXCLUDE ( SUBJAREA , "MEDI" ) OR EXCLUDE ( SUBJAREA , "NEUR" ) OR EXCLUDE ( SUBJAREA , "PHAR" ) OR EXCLUDE ( SUBJAREA , "VETE" ) OR EXCLUDE ( SUBJAREA , "PHYS" ) OR EXCLUDE ( SUBJAREA , "ECON" ) OR EXCLUDE ( SUBJAREA , "NURS" ) ) AND ( LIMIT-TO ( PUBSTAGE , "final" ) ) AND ( LIMI…	Scopus	Genome-wide transcriptome analysis of two maize inbred lines under drought stress	Zheng et al., 2010: Zheng, J., Fu, J., Gou, M., Huai, J., Liu, Y., Jian, M., Huang, Q., Guo, X., Dong, Z., Wang, H., Wang, G.	Drought stress greatly affects plant growth and crop yield. To understand the transcriptome dynamics during drought stress in maize seedlings, genome-wide gene expression profiling was compared between the drought-tolerant line Han21 and drought-sensitive line Ye478 using Affymetrix Maize Genome Array containing 17,555 probe sets. The results showed that in response to drought, the Han21 line had…	Rejected	no expression of DREB2
ALL ( dreb2 AND "drought stress" ) AND ( LIMIT-TO ( DOCTYPE , "ar" ) ) AND ( LIMIT-TO ( LANGUAGE , "English" ) ) AND ( EXCLUDE ( SUBJAREA , "MEDI" ) OR EXCLUDE ( SUBJAREA , "NEUR" ) OR EXCLUDE ( SUBJAREA , "PHAR" ) OR EXCLUDE ( SUBJAREA , "VETE" ) OR EXCLUDE ( SUBJAREA , "PHYS" ) OR EXCLUDE ( SUBJAREA , "ECON" ) OR EXCLUDE ( SUBJAREA , "NURS" ) ) AND ( LIMIT-TO ( PUBSTAGE , "final" ) ) AND ( LIMI…	Scopus	New transcriptomic insights in two RNAi wheat lines with the gliadins strongly down-regulated by two endosperm specific promoters	Marín-Sanz et al., 2022: Marín-Sanz, M., Iehisa, J.C.M., Barro, F.	The gluten proteins of wheat grain are responsible for visco-elastic properties of flour, but they also trigger the immune-response of celiac disease. In this work, two low-gliadin RNA interference (RNAi) wheat lines that differ for the promoter driving the silencing (D-hordein and γ-gliadin promoters for D783 and D793 lines, respectively), were characterized at transcriptomic, and protein fracti…	Rejected	no expression of DREB2
