# Supplementary material for: Meta-analysis of plant growth-promoting rhizobacteria interaction with host plants: implications for drought stress response gene expression
Source: Front Plant Sci. 2024 Jan 15;14:1282553. doi: 10.3389/fpls.2023.1282553 (PMC10823023; doi:10.3389/fpls.2023.1282553)
Supplement: Supplementary file 26 [file Table_11.xlsx]

## Sheet: ACO_ACS_APX
	Gene	Reference	Species plant	Species PGPR	Type of drought stress	Organ	N° individuals control	N° individuals treatment	Fold change control	Fold change treatment	Standard Error control	Standard Error treatment	Standard Deviation control	Standard Deviation treatment	Spooled	Cohens's d	Hedges's g	Standard error effect size
	ACO	Saikia et al.,2018	Vigna mungo L.	Ochrobactrum pseudogrignonenseRJ12, Pseudomonas sp.RJ15, Bacillus subtilis RJ46 (consortium)	PEG	Leaf	5	5	1	1.2	0.675086	0.675086	1.50954	1.50954	1.35017	0.148129	0.133794	0.633163
	ACO	Saikia et al.,2018	Vigna mungo L.	Ochrobactrum pseudogrignonenseRJ12, Pseudomonas sp.RJ15, Bacillus subtilis RJ46 (consortium)	PEG	Leaf	5	5	1	1.52	0.675086	0.675086	1.50954	1.50954	1.35017	0.385136	0.347865	0.637221
	ACO	Saikia et al.,2018	Pisum sativum L.	Ochrobactrum pseudogrignonenseRJ12, Pseudomonas sp.RJ15, Bacillus subtilis RJ46 (consortium)	PEG	Root	5	5	1	2.21	0.675086	0.675086	1.50954	1.50954	1.35017	0.896183	0.809455	0.657846
	ACO	Saikia et al.,2018	Pisum sativum L.	Ochrobactrum pseudogrignonenseRJ12, Pseudomonas sp.RJ15, Bacillus subtilis RJ46 (consortium)	PEG	Root	5	5	1	2.31	0.675086	0.675086	1.50954	1.50954	1.35017	0.970247	0.876352	0.662118
	ACO	SkZ et al., 2018	Zea mays L.	P.putidastrain FBKV2	Dehydration	Leaf	3	3	1	-1.1456	0.871532	0.871532	0.871532	1.50954	1.23253	-1.74081	-1.39265	0.910104
	ACO	Sandhya et al., 2018	Zea mays L.	Acinetobacter baumannii Strain MZ30V92	PEG	Root	6	6	1	-6.16	0.871532	0.871532	0.871532	2.13481	2.04392	-3.50307	-3.2336	0.445646
	ACO	Sandhya et al., 2018	Zea mays L.	Acinetobacter baumannii Strain MZ30V92	PEG	Leaf	6	6	1	-3.56	0.871532	0.871532	0.871532	2.13481	1.9488	-2.3399	-2.1599	0.726441
	ACO	Tiwari et al., 2016	Cicer arietinum L.	Pseudomonas putida	Dehydration	Leaf	30	30	1	3	0.871532	0.871532	3.6976	3.6976	3.63545	0.550139		0.263038
	ACO	Tiwari et al., 2016	Cicer arietinum L.	Pseudomonas putida	Dehydration	Leaf	30	30	1	6	0.871532	0.871532	3.6976	3.6976	3.63545	1.37535		0.287106
	ACS	Tiwari et al., 2016	Cicer arietinum L.	Pseudomonas putida	Dehydration	Leaf	30	30	1	3	0.871532	0.871532	3.6976	3.6976	3.63545	1.37535		0.287106
	ACS	Tiwari et al., 2016	Cicer arietinum L.	Pseudomonas putida	Dehydration	Leaf	30	30	1	6	0.871532	0.871532	3.6976	3.6976	3.63545	1.37535		0.287106
	ACS	Saikia et al.,2018	Vigna mungo L.	Ochrobactrum pseudogrignonenseRJ12, Pseudomonas sp.RJ15, Bacillus subtilis RJ46 (consortium)	PEG	Leaf	5	5	1	4.5	0.675086	0.675086	1.50954	1.50954	1.35017	2.59226	2.3414	0.821041
	ACS	Saikia et al.,2018	Vigna mungo L.	Ochrobactrum pseudogrignonenseRJ12, Pseudomonas sp.RJ15, Bacillus subtilis RJ46 (consortium)	PEG	Leaf	5	5	1	3.65	0.675086	0.675086	1.50954	1.50954	1.35017	1.96271	1.77277	0.746416
	ACS	Saikia et al.,2018	Pisum sativum L.	Ochrobactrum pseudogrignonenseRJ12, Pseudomonas sp.RJ15, Bacillus subtilis RJ46 (consortium)	PEG	Root	5	5	1	13.68	0.871532	0.871532	1.50954	1.50954	1.35017	9.3914	8.48256	1.99942
	ACS	Saikia et al.,2018	Pisum sativum L.	Ochrobactrum pseudogrignonenseRJ12, Pseudomonas sp.RJ15, Bacillus subtilis RJ46 (consortium)	PEG	Root	5	5	1	15.38	0.871532	0.871532	1.50954	1.50954	1.35017	10.6505	9.61981	2.24211
	ACS	Sandhya et al., 2018	Zea mays L.	Acinetobacter baumannii Strain MZ30V92	PEG	Leaf	6	6	1	-3.56	0.871532	0.871532	2.13481	2.13481	1.9488	-2.3399	-2.1599	0.726441
	ACS	Sandhya et al., 2018	Zea mays L.	Acinetobacter baumannii Strain MZ30V92	PEG	Root	6	6	1	-5.87	0.871532	0.871532	2.13481	2.13481	1.9488	-3.52524	-3.25407	0.880079
	ACS	SkZ et al., 2018	Zea mays L.	P.putidastrain FBKV2	PEG	Leaf	3	3	1	-1.609	0.871532	0.871532	1.50954	1.50954	1.23253	-2.11678	-1.69342	0.951651
	APX	Gururani et al., 2013	Solanum tuberosum L.	Bacillus	PEG	Root	5	5	26.66	31.96	0.871532	0.871532	1.9488	1.9488	3.03827	1.74441	1.5756	0.723965
	APX	Gururani et al., 2013	Solanum tuberosum L.	Bacillus	PEG	Root	5	5	26.66	29.04	0.871532	0.871532	1.9488	1.9488	3.03827	0.78334	0.707533	0.651943
	APX	Murali et al., 2021	Pennisetum glaucum	Bacillus amyloliquefaciens	Dehydration		3	3	0.637	1.022	0.084	0.2	1.50954	0.34641	0.799568	0.48151	0.385208	0.824034
	APX	Murali et al., 2021	Pennisetum glaucum	Bacillus amyloliquefaciens	Dehydration		3	3	0.809	1.577	0.144	0.13	1.50954	0.225167	0.776468	0.989095	0.791276	0.847846
	APX	Singh et al., 2020	Oryza sativa L.	Pseudomonas fluorescens	Dehydration	Leaf	3	3	1	9.97	0.871532	0.871532	1.50954	1.50954	1.51914	5.90468	4.72374	1.58938
	APX	Tiwari et al., 2016	Cicer arietinum L.	Pseudomonas putida	Dehydration		30	30	1	-2.5	0.275603	0.275603	1.50954	1.50954	2.20275	-1.58893		0.296151
	APX	Wang et al., 2012	Cucumis sativus L.	Bacillus cereus AR156, Bacillus subtilis SM21, and Serratia sp. XY21 (consortium)	Dehydration	Root	24	24	0.5	0.57	0.308133	0.308133	1.50954	1.50954	2.18376	0.0320549	0.0315294	0.288693
	APX	Wang et al., 2012	Cucumis sativus L.	Bacillus cereus AR156, Bacillus subtilis SM21, and Serratia sp. XY21 (consortium)	Dehydration	Root	24	24	0.946	0.897	0.308133	0.308133	1.50954	1.50954	2.18376	-0.0224384	-0.0220706	0.288684
	APX	Wang et al., 2012	Cucumis sativus L.	Bacillus cereus AR156, Bacillus subtilis SM21, and Serratia sp. XY21 (consortium)	Dehydration	Root	24	24	0.474	0.139	0.308133	0.308133	1.50954	1.50954	2.18376	-0.153405	-0.150891	0.289086
	APX	Wang et al., 2012	Cucumis sativus L.	Bacillus cereus AR156, Bacillus subtilis SM21, and Serratia sp. XY21 (consortium)	Dehydration	Root	24	24	0.555	0.135	0.308133	0.308133	1.50954	1.50954	2.18376	-0.192329	-0.189176	0.28932
	APX	Wang et al., 2012	Cucumis sativus L.	Bacillus cereus AR156, Bacillus subtilis SM21, and Serratia sp. XY21 (consortium)	Dehydration	Root	24	24	0.261	0.226	0.308133	0.308133	1.50954	1.50954	2.18376	-0.0160274	-0.0157647	0.28868
	APX	Wang et al., 2012	Cucumis sativus L.	Bacillus cereus AR156, Bacillus subtilis SM21, and Serratia sp. XY21 (consortium)	Dehydration	Root	24	24	0.298	0.455	0.308133	0.308133	1.50954	1.50954	2.18376	0.0718945	0.0707159	0.288765
	DREB2	Bandeppa et al., 2019	Drought sensitive mustard genotype Pusa Karishma LES-39	Bacillus cereus strain NA D7	dehydration	Leaf	18	18	1	2.53	0.16	0.16	0.67	0.67	0.651123	2.34979	2.29757	0.429451
	DREB2	Bandeppa et al., 2019	Drought sensitive mustard genotype Pusa Karishma LES-39	Bacillus sp. strain MR D17	dehydration	Leaf	18	18	1	3.84	0.16	0.16	0.67	0.67	0.651123	4.3617	4.26477	0.603097
	DREB2	Barnawal et al., 2017	Triticum aestivum cv. HD2285	Bacillus subtilis LDR2	dehydration	Shoot	30	30	1	3.58	0.1	0.09	0.547723	0.49295	0.512299	5.03612	4.97072	0.52208
	DREB2	Gagné-Bourque et al., 2015	Brachypodium distachyon plants from the inbred line Bd21	B. subtilis endophytic strain B26	dehydration	Seedling	12	12	1	3.47	0.018307	0.0261583	0.0776699	0.0906149	0.0807982	30.57	29.5158	4.27976
	DREB2	Gagné-Bourque et al., 2015	Brachypodium distachyon plants from the inbred line Bd21	B. subtilis endophytic strain B26	dehydration	Leaf	18	18	1	34.04	0.047907	0.910232	0.203252	3.86179	2.65743	12.433	12.1568	1.47095
	DREB2	Gagné-Bourque et al., 2015	Brachypodium distachyon plants from the inbred line Bd21	B. subtilis endophytic strain B26	dehydration	Leaf	18	18	1	53.05	0.047907	2.20372	0.203252	9.34959	6.42641	8.09939	7.9194	0.99105
	DREB2	Kumari et al., 2016	Vigna radiata (mung bean)	Pseudomonas simiae strain AU	dehydration	Root	6	6	1	1.65	1.64116	1.64116	0.67	0.67	0.611624	1.06275	0.980996	0.61109
	DREB2	Kumari et al., 2016	Vigna radiata (mung bean)	Pseudomonas simiae strain AU M4	dehydration	Root	6	6	1	1.8	1.64116	1.64116	0.67	0.67	0.611624	1.30799	1.20738	0.627753
	DREB2	Manjunatha et al., 2022	Pearl millet (Pennisetum glaucum (L.) R. Br.)	Shewanella putrefaciens strain MCL-1	dehydration	Leaf	9	9	1	1.9	0.07	0.04	0.21	0.12	0.161245	5.58156	5.31577	1.00357
	DREB2	Manjunatha et al., 2022	Pearl millet (Pennisetum glaucum (L.) R. Br.)	Cronobacter dublinensis strain MKS-1	dehydration	Leaf	9	9	1	4	0.07	0.23	0.21	0.69	0.480833	6.23918	5.94207	1.09682
	DREB2	Sarma et al., 2014	Mung bean (Vigna radiata (L) R. Wilczek)	Pseudomonas isolate GGRJ21	PEG	Leaf	12	12	1	3.1	/	/	0.05	0.15	0.107044	19.6182	18.9417	2.76431
	DREB2	Vaishnav et al., 2019	Soybean (Glycine max L. Merrill) JS9560	Pseudomonas simiae strain AU	PEG	Root	6	6	1	3.83	0.05	0.13	0.12	0.31	0.214573	13.189	12.1744	2.55128
	DREB2	Gontia-Mishra et al., 2016	Wheat (Triticum aestivum L.) cv. GW 273	Klebsiella sp. (IG 3)	dehydration	Leaf	30	30	1	6.32	/	/	0.27	0.57	0.438486	12.1327	/	1.17963
	DREB2	Gontia-Mishra et al., 2016	Wheat (Triticum aestivum L.) cv. GW 273	Enterobacter ludwigii (IG 10)	dehydration	Leaf	30	30	1	5.64	/	/	0.27	0.25	0.255819	18.1378	/	1.68872
	DREB2	Gontia-Mishra et al., 2016	Wheat (Triticum aestivum L.) cv. GW 273	Flavobacterium sp (IG 15)	dehydration	Leaf	30	30	1	5.32	/	/	0.27	0.64	0.482916	8.94565	/	0.943633
