# Supplementary material for: Meta-analysis of plant growth-promoting rhizobacteria interaction with host plants: implications for drought stress response gene expression
Source: Front Plant Sci. 2024 Jan 15;14:1282553. doi: 10.3389/fpls.2023.1282553 (PMC10823023; doi:10.3389/fpls.2023.1282553)
Supplement: Supplementary file 27 [file Table_12.xlsx]

## Sheet: Hoja1
Gene	Reference	Species plant	Type of drought stress	Organ	N° individuals control	N° individuals treatment	Fold change control	Fold change treatment	Standard Error control	Standard Error treatment	Standard Deviation control	Standard Deviation treatment	Spooled	Cohens's d	Hedges's g	Standard error effect size
DREB2	Barnawal et al., 2017	Wheat (Triticum aestivum) cv. HD2285	PEG	Shoot	30	30	1	2.65	0.1	0.14	0.55	0.77	0.66	0.06		0.26
DREB2	Manjunatha et al., 2022	Pearl millet (Pennisetum glaucum (L.) R. Br.)	dehydration	Leaf	9	9	1	0.9	0.07	0.1	0.21	0.3	0.24	-0.41	-0.39	0.48
DREB2	Ma et al., 2020	Soybean (Glycine max L. Merr.) cultivar Williams 82	dehydration	Root	18	18	4.28	17.49	/	/	0.79	1.57	1.21	10.94	10.69	1.3
DREB2	Sarma et al., 2014	Mung bean (Vigna radiata (L) R. Wilczek)	dehydration	Leaf	9	9	1	1.81	/	/	0.06	0.09	0.07	11.23	10.7	1.84
DREB2	Sheikh-Mohamadi et al., 2018	Iranian crested wheatgrass (Agropyron cristatum L.) AC1	dehydration	Leaf	12	12	1.98394	3.249	/	/	0.0702811	0.230924	0.163416	7.74134	7.47439	1.1535
DREB2	Sheikh-Mohamadi et al., 2018	Iranian crested wheatgrass (Agropyron cristatum L.) AC1	dehydration	Leaf	12	12	1.98394	2.68675	/	/	0.311245	0.230924	0.262376	2.67864	2.58627	0.553188
DREB2	Sheikh-Mohamadi et al., 2018	Iranian crested wheatgrass (Agropyron cristatum L.) AC1	dehydration	Leaf	12	12	1.98394	2.90763	/	/	0.130522	0.230924	0.17958	5.14363	4.96626	0.824921
DREB2	Sheikh-Mohamadi et al., 2018	Iranian crested wheatgrass (Agropyron cristatum L.) AC2	dehydration	Leaf	12	12	1.44177	2.72691	/	/	0.240964	0.230924	0.22595	5.68772	5.49159	0.891599
DREB2	Sheikh-Mohamadi et al., 2018	Iranian crested wheatgrass (Agropyron cristatum L.) AC2	dehydration	Leaf	12	12	1.44177	2.91767	/	/	0.230924	0.230924	0.221093	6.6755	6.44531	1.01594
DREB2	Sheikh-Mohamadi et al., 2018	Iranian crested wheatgrass (Agropyron cristatum L.) AC2	dehydration	Leaf	12	12	1.44177	2.44578	/	/	0.240964	0.230924	0.22595	4.44353	4.29031	0.741714
DREB2	Sheikh-Mohamadi et al., 2018	Iranian crested wheatgrass (Agropyron cristatum L.) AC3	dehydration	Leaf	12	12	1.83333	4.20281	/	/	0.160643	0.230924	0.190444	12.4419	12.0129	1.78132
DREB2	Sheikh-Mohamadi et al., 2018	Iranian crested wheatgrass (Agropyron cristatum L.) AC3	dehydration	Leaf	12	12	1.83333	3.6004	/	/	0.160643	0.230924	0.190444	9.2787	8.95874	1.356
DREB2	Sheikh-Mohamadi et al., 2018	Iranian crested wheatgrass (Agropyron cristatum L.) AC3	dehydration	Leaf	12	12	1.83333	3.77108	/	/	0.170683	0.230924	0.194405	9.96758	9.62387	1.44784
DREB2	Sheikh-Mohamadi et al., 2018	Iranian crested wheatgrass (Agropyron cristatum L.) AC4	dehydration	Leaf	12	12	1.65261	3.61044	/	/	0.251004	0.130522	0.191532	10.2219	9.86947	1.48188
DREB2	Sheikh-Mohamadi et al., 2018	Iranian crested wheatgrass (Agropyron cristatum L.) AC4	dehydration	Leaf	12	12	1.65261	3.96185	/	/	0.190763	0.130522	0.156484	14.757	14.2482	2.09668
DREB2	Sheikh-Mohamadi et al., 2018	Iranian crested wheatgrass (Agropyron cristatum L.) AC4	dehydration	Leaf	12	12	1.65261	3.53012	/	/	0.261044	0.130522	0.197588	9.50216	9.1745	1.38573
DREB2	Sheikh-Mohamadi et al., 2018	Iranian crested wheatgrass (Agropyron cristatum L.) AC5	dehydration	Leaf	12	12	1.93373	5.32731	/	/	0.0903614	0.200803	0.149075	22.7643	21.9793	3.1986
DREB2	Sheikh-Mohamadi et al., 2018	Iranian crested wheatgrass (Agropyron cristatum L.) AC5	dehydration	Leaf	12	12	1.93373	4.16265	/	/	0.170683	0.200803	0.178419	12.4926	12.0618	1.7882
DREB2	Sheikh-Mohamadi et al., 2018	Iranian crested wheatgrass (Agropyron cristatum L.) AC5	dehydration	Leaf	12	12	1.93373	5.10643	/	/	0.150602	0.200803	0.169931	18.6705	18.0267	2.63376
DREB2	Sheikh-Mohamadi et al., 2018	Iranian crested wheatgrass (Agropyron cristatum L.) AC6	dehydration	Leaf	12	12	1.54217	4.81526	/	/	0.160643	0.130522	0.140128	23.3578	22.5524	3.28066
DREB2	Sheikh-Mohamadi et al., 2018	Iranian crested wheatgrass (Agropyron cristatum L.) AC6	dehydration	Leaf	12	12	1.54217	5.50803	/	/	0.230924	0.130522	0.17958	22.084	21.3225	3.1046
DREB2	Sheikh-Mohamadi et al., 2018	Iranian crested wheatgrass (Agropyron cristatum L.) AC6	dehydration	Leaf	12	12	1.54217	4.36345	/	/	0.291165	0.130522	0.216019	13.0604	12.61	1.86532
DREB2	Tao et al., 2022	Tomato (Solanum lycopersicum Mill Cv. CHNLiChun)	dehydration	Seedling	3	3	1	1.83	0.1	0.14	0.173205	0.242487	0.172047	4.82428	3.85942	1.38128
DREB2	Tao et al., 2022	Tomato (Solanum lycopersicum Mill Cv. CHNLiChun)	dehydration	Seedling	3	3	1	2.91	0.1	0.64	0.173205	1.10851	0.647765	2.9486	2.35888	1.06318
DREB2	Tao et al., 2022	Tomato (Solanum lycopersicum Mill Cv. CHNLiChun)	dehydration	Seedling	3	3	1	8.4	0.1	0.44	0.173205	0.762102	0.451221	16.4	13.12	3.87442
DREB2	Tao et al., 2022	Tomato (Solanum lycopersicum Mill Cv. CHNLiChun)	dehydration	Seedling	3	3	1	5.96	0.1	0.3	0.173205	0.519615	0.316228	15.6849	12.5479	3.71315
DREB2	Tao et al., 2022	Tomato (Solanum lycopersicum Mill Cv. CHNLiChun)	dehydration	Seedling	3	3	1	3.18493	0.164384	0.143836	0.284721	0.249131	0.218428	10.003	8.0024	2.45014
DREB2	Tao et al., 2022	Tomato (Solanum lycopersicum Mill Cv. CHNLiChun)	dehydration	Seedling	3	3	1	3.30822	0.164384	0.143836	0.284721	0.249131	0.218428	10.5674	8.45394	2.57341
DREB2	Tao et al., 2022	Tomato (Solanum lycopersicum Mill Cv. CHNLiChun)	dehydration	Seedling	3	3	1	12.1233	0.164384	0.678082	0.284721	1.17447	0.697723	15.9423	12.7538	3.77116
DREB2	Vu et al., 2021	Mungbean (Vigna radiata L. Wilczek) DX208 (improved cultivar, G1)	dehydration	Leaf	32	32	1	0.800905	0.108597	0.298643	0.614319	1.68938	1.25108	-0.159139	/	0.250395
DREB2	Vu et al., 2021	Mungbean (Vigna radiata L. Wilczek) DX208 Tam Thanh Hoa (landrace, G2)	dehydration	Leaf	32	32	0.864253	0.61086	0.117647	0.289593	0.665512	1.63818	1.23062	-0.205907	/	0.250662
DREB2	Vu et al., 2021	Mungbean (Vigna radiata L. Wilczek) DX208 (improved cultivar, G1)	dehydration	Leaf	32	32	1.1086	1.39819	0.0995475	0.307692	0.563126	1.74057	1.27321	0.227451	/	0.250807
DREB2	Vu et al., 2021	Mungbean (Vigna radiata L. Wilczek) DX208 Tam Thanh Hoa (landrace, G2)	dehydration	Leaf	32	32	0.61086	0.909502	0.108597	0.316742	0.614319	1.79176	1.31827	0.226541	/	0.250801
DREB2	Vu et al., 2021	Mungbean (Vigna radiata L. Wilczek) DX208 (improved cultivar, G1)	dehydration	Leaf	32	32	0.900452	1.09955	0.117647	0.316742	0.665512	1.79176	1.33026	0.149667	/	0.25035
DREB2	Vu et al., 2021	Mungbean (Vigna radiata L. Wilczek) DX208 Tam Thanh Hoa (landrace, G2)	dehydration	Leaf	32	32	1.0543	3.1448	0.117647	0.289593	0.665512	1.63818	1.23062	1.69874	/	0.291624
DREB2	Vu et al., 2021	Mungbean (Vigna radiata L. Wilczek) DX208 (improved cultivar, G1)	dehydration	Leaf	32	32	1.59729	2.11312	0.117647	0.298643	0.665512	1.68938	1.2637	0.408196	/	0.25259
DREB2	Vu et al., 2021	Mungbean (Vigna radiata L. Wilczek) DX208 Tam Thanh Hoa (landrace, G2)	dehydration	Leaf	32	32	1.31674	1.08145	0.117647	0.298643	0.665512	1.68938	1.2637	-0.186195	/	0.250541
DREB2	Vu et al., 2021	Mungbean (Vigna radiata L. Wilczek) DX208 (improved cultivar, G1)	dehydration	Root	32	32	1.19005	2.63801	0.153846	0.352941	0.870285	1.99654	1.5158	0.955245	/	0.263873
DREB2	Vu et al., 2021	Mungbean (Vigna radiata L. Wilczek) DX208 Tam Thanh Hoa (landrace, G2)	dehydration	Root	32	32	1.0724	0.99095	0.162896	0.361991	0.921479	2.04773	1.56281	-0.0521164	/	0.250042
DREB2	Vu et al., 2021	Mungbean (Vigna radiata L. Wilczek) DX208 (improved cultivar, G1)	dehydration	Root	32	32	0.638009	0.674208	0.153846	0.371041	0.870285	2.09892	1.58138	0.0228908	/	0.250008
DREB2	Vu et al., 2021	Mungbean (Vigna radiata L. Wilczek) DX208 Tam Thanh Hoa (landrace, G2)	dehydration	Root	32	32	0.701357	0.366516	0.153846	0.361991	0.870285	2.04773	1.54853	-0.216232	/	0.25073
DREB2	Vu et al., 2021	Mungbean (Vigna radiata L. Wilczek) DX208 (improved cultivar, G1)	dehydration	Root	32	32	1.0543	0.891403	0.153846	0.361991	0.870285	2.04773	1.54853	-0.105194	/	0.250173
DREB2	Vu et al., 2021	Mungbean (Vigna radiata L. Wilczek) DX208 Tam Thanh Hoa (landrace, G2)	dehydration	Root	32	32	0.239819	0.556561	0.153846	0.352941	0.870285	1.99654	1.5158	0.20896	/	0.250681
DREB2	Vu et al., 2021	Mungbean (Vigna radiata L. Wilczek) DX208 (improved cultivar, G1)	dehydration	Root	32	32	0.0588235	1.98643	0.153846	0.361991	0.870285	2.04773	1.54853	1.24479	/	0.27314
DREB2	Vu et al., 2021	Mungbean (Vigna radiata L. Wilczek) DX208 Tam Thanh Hoa (landrace, G2)	dehydration	Root	32	32	0.475113	2.86425	0.162896	0.352941	0.921479	1.99654	1.53039	1.56113	/	0.285552
DREB2	Vu et al., 2021	Mungbean (Vigna radiata L. Wilczek) DX208 (improved cultivar, G1)	dehydration	Leaf	32	32	1.36735	4.78061	0.168367	0.436224	0.95243	2.46766	1.8409	1.85413	/	0.298928
DREB2	Vu et al., 2021	Mungbean (Vigna radiata L. Wilczek) DX208 Tam Thanh Hoa (landrace, G2)	dehydration	Leaf	32	32	1.51276	4.375	0.17602	0.436224	0.995722	2.46766	1.85196	1.54552	/	0.284888
DREB2	Vu et al., 2021	Mungbean (Vigna radiata L. Wilczek) DX208 (improved cultivar, G1)	dehydration	Leaf	32	32	0.977041	2.88265	0.168367	0.443878	0.95243	2.51095	1.86904	1.01957	/	0.265747
DREB2	Vu et al., 2021	Mungbean (Vigna radiata L. Wilczek) DX208 Tam Thanh Hoa (landrace, G2)	dehydration	Leaf	32	32	1.41327	3.0051	0.17602	0.436224	0.995722	2.46766	1.85196	0.859541	/	0.261289
DREB2	Vu et al., 2021	Mungbean (Vigna radiata L. Wilczek) DX208 (improved cultivar, G1)	dehydration	Leaf	32	32	2.05612	2.63776	0.183673	0.436224	1.03901	2.46766	1.86345	0.312127	/	0.251518
DREB2	Vu et al., 2021	Mungbean (Vigna radiata L. Wilczek) DX208 Tam Thanh Hoa (landrace, G2)	dehydration	Leaf	32	32	1.1301	2.7602	0.168367	0.428571	0.95243	2.42437	1.81282	0.899207	/	0.26233
DREB2	Vu et al., 2021	Mungbean (Vigna radiata L. Wilczek) DX208 (improved cultivar, G1)	dehydration	Leaf	32	32	1.22194	0.885204	0.168367	0.428571	0.95243	2.42437	1.81282	-0.185752	/	0.250539
DREB2	Vu et al., 2021	Mungbean (Vigna radiata L. Wilczek) DX208 Tam Thanh Hoa (landrace, G2)	dehydration	Leaf	32	32	0.494898	2.17857	0.160714	0.443878	0.909137	2.51095	1.85857	0.905898	/	0.26251
DREB2	Vu et al., 2021	Mungbean (Vigna radiata L. Wilczek) DX208 (improved cultivar, G1)	dehydration	Root	32	32	0.990148	2.25616	0.123153	0.285714	0.696657	1.61624	1.2249	1.03356	/	0.266168
DREB2	Vu et al., 2021	Mungbean (Vigna radiata L. Wilczek) DX208 Tam Thanh Hoa (landrace, G2)	dehydration	Root	32	32	1.15764	2.84729	0.118227	0.26601	0.668791	1.50478	1.14606	1.47432	/	0.281924
DREB2	Vu et al., 2021	Mungbean (Vigna radiata L. Wilczek) DX208 (improved cultivar, G1)	dehydration	Root	32	32	0.512315	0.862069	0.128079	0.285714	0.724523	1.61624	1.23271	0.283728	/	0.251255
DREB2	Vu et al., 2021	Mungbean (Vigna radiata L. Wilczek) DX208 Tam Thanh Hoa (landrace, G2)	dehydration	Root	32	32	1.2266	0.605911	0.123153	0.280788	0.696657	1.58838	1.20712	-0.514191	/	0.254098
DREB2	Vu et al., 2021	Mungbean (Vigna radiata L. Wilczek) DX208 (improved cultivar, G1)	dehydration	Root	32	32	1	1.21182	0.123153	0.29064	0.696657	1.64411	1.24274	0.170448	/	0.250454
DREB2	Vu et al., 2021	Mungbean (Vigna radiata L. Wilczek) DX208 Tam Thanh Hoa (landrace, G2)	dehydration	Root	32	32	0.807882	0.704433	0.123153	0.280788	0.696657	1.58838	1.20712	-0.0856986	/	0.250115
DREB2	Vu et al., 2021	Mungbean (Vigna radiata L. Wilczek) DX208 (improved cultivar, G1)	dehydration	Root	32	32	0.965517	1.36946	0.123153	0.285714	0.696657	1.61624	1.2249	0.329774	/	0.251693
DREB2	Vu et al., 2021	Mungbean (Vigna radiata L. Wilczek) DX208 Tam Thanh Hoa (landrace, G2)	dehydration	Root	32	32	0.221675	1.29064	0.123153	0.29064	0.696657	1.64411	1.24274	0.86017	/	0.261305
DREB2	Wang et al., 2021	Wheat AK58	PEG	Root	3	3	1.16337	2.79703	0.0445545	0.148515	0.0771706	0.257235	0.155054	10.5361	8.42887	2.56655
DREB2	Wang et al., 2021	Wheat AK58	PEG	Root	3	3	1.31188	1.73267	0.0643564	0.0990099	0.111469	0.17149	0.118088	3.56339	2.85071	1.15926
DREB2	Wang et al., 2021	Wheat AK58	PEG	Root	3	3	1.0396	1.57921	0.0594059	0.0841584	0.102894	0.145767	0.103013	5.23821	4.19056	1.45948
DREB2	Wang et al., 2021	Wheat AK58	PEG	Root	3	3	0.975248	1.42574	0.0643564	0.0841584	0.111469	0.145767	0.105945	4.25215	3.40172	1.2771
DREB2	Wang et al., 2021	Wheat AK58	PEG	Root	3	3	0.935644	1.08911	0.0445545	0.0544554	0.0771706	0.0943196	0.0703598	2.18115	1.74492	0.959373
DREB2	Wang et al., 2021	Wheat AK58	PEG	Root	3	3	0.965347	1.73267	0.0594059	0.10396	0.102894	0.180065	0.119737	6.40846	5.12677	1.69026
DREB2	Wang et al., 2021	Wheat AK58	PEG	Leaf	3	3	1.21858	3.54098	0.0546448	0.191257	0.0946476	0.331267	0.19891	11.6756	9.34052	2.81729
DREB2	Wang et al., 2021	Wheat AK58	PEG	Leaf	3	3	1.08743	3.21311	0.0382514	0.174863	0.0662533	0.302872	0.178998	11.8754	9.50035	2.86148
DREB2	Wang et al., 2021	Wheat AK58	PEG	Leaf	3	3	1.2623	2.99454	0.0601093	0.174863	0.104112	0.302872	0.184906	9.36821	7.49457	2.31244
DREB2	Wang et al., 2021	Wheat AK58	PEG	Leaf	3	3	1.14208	2.55191	0.0601093	0.136612	0.104112	0.236619	0.149251	9.44605	7.55684	2.32927
DREB2	Wang et al., 2021	Wheat AK58	PEG	Leaf	3	3	1.05464	1.71038	0.0382514	0.0983607	0.0662533	0.170366	0.105537	6.21336	4.97069	1.65095
DREB2	Wang et al., 2021	Wheat AK58	PEG	Leaf	3	3	1.35519	3	0.0819672	0.174863	0.141971	0.302872	0.193121	8.51697	6.81358	2.12965
DREB2	Yu et al., 2016	Cassava (Manihot esculenta Crantz) SC124	PEG	Leaf	5	5	0.980998	3.44181	/	/	0.02	0.247031	0.156747	15.6992	14.1799	3.23319
DREB2	Zhang et al., 2022	Rice Nipponbare (Oryza sativa ssp. japonica ’Nipponbare’)	PEG	Leaf	3	3	0.992032	4.31474	0.04	0.89243	0.069282	1.54573	0.893326	3.71948	2.97558	4.17403
DREB2	Ariharasutharsan et al., 2022	Mungbean varieties VRM (Gg) 1	dehydration	Leaf	15	15	1.15652	5.29565	0.678261	0.0695652	2.62689	0.269425	1.80392	2.29452	2.2325	0.465189
DREB2	Ariharasutharsan et al., 2022	Mungbean varieties CO6	dehydration	Leaf	15	15	0.956522	2.71304	0.0782609	0.217391	0.303103	0.841953	0.611299	2.87343	2.79577	0.513425
DREB2	Devi et al., 2019	Sugarcane varieties, viz. Co 8021 (S)	dehydration	Leaf	3	3	0.163462	0.913462	0.01	0.0961538	0.0173205	0.166543	0.0966724	7.75816	6.20653	1.96895
DREB2	Devi et al., 2019	Sugarcane varieties, viz. Co 8021 (S)	dehydration	Shoot	3	3	0.0961538	1.5	0.02	0.115385	0.034641	0.199852	0.117105	11.9879	9.59033	2.88638
DREB2	Devi et al., 2019	Sugarcane varieties, viz. Co 06022 (T)	dehydration	Leaf	3	3	0.0721154	1.00481	0.01	0.100962	0.0173205	0.174871	0.101456	9.19311	7.35449	2.27465
DREB2	Devi et al., 2019	Sugarcane varieties, viz. Co 06022 (T)	dehydration	Shoot	3	3	0.0961538	2.57212	0.02	0.149038	0.034641	0.258142	0.150374	16.4653	13.1722	3.88917
DREB2	Eftekhari et al., 2017	Wheat cultivar Kavir	dehydration	Leaf	6	6	0.629428	2.64578	0.027248	0.108992	0.0667436	0.266974	0.177635	11.3511	10.4779	2.21535
DREB2	Eftekhari et al., 2017	Wheat cultivar Kalheydari	dehydration	Leaf	6	6	0.689373	2.24251	0.0381471	0.119891	0.093441	0.293672	0.198929	7.80749	7.20691	1.58034
DREB2	Eftekhari et al., 2017	Wheat cultivar Shahpasand	dehydration	Leaf	6	6	0.536785	1.57766	0.027248	0.0871935	0.0667436	0.213579	0.14444	7.20626	6.65194	1.47547
DREB2	Kudo et al., 2014	Lactuca sativa L. cv. Okayama-saradana (Takii Seed Co., Japan)	PEG	/	3	3	2.54128	0.927152	1.84404	0.02	3.19397	0.034641	1.84415	-0.875274	-0.700219	0.841145
DREB2	Kudo et al., 2014	Lactuca sativa L. cv. Okayama-saradana (Takii Seed Co., Japan)	PEG	/	3	3	0.669725	1.0596	0.256881	0.430464	0.44493	0.745585	0.501285	0.777757	0.622206	0.836019
DREB2	Kudo et al., 2014	Lactuca sativa L. cv. Okayama-saradana (Takii Seed Co., Japan)	PEG	/	3	3	0.889908	1.29139	0.59633	0.165563	1.03287	0.286763	0.618887	0.648717	0.518974	0.830127
DREB2	Kudo et al., 2014	Lactuca sativa L. cv. Okayama-saradana (Takii Seed Co., Japan)	PEG	/	3	3	1.18349	0.960265	0.256881	0.13245	0.44493	0.229411	0.289017	-0.772347	-0.617877	0.835752
DREB2	Kudo et al., 2014	Lactuca sativa L. cv. Okayama-saradana (Takii Seed Co., Japan)	PEG	/	3	3	1.69725	13.9735	0.880734	1.78808	1.52548	3.09704	1.99322	6.15901	4.92721	1.64006
DREB2	Li et al., 2021	Strawberry cultivar ‘Honeoye’ (Fragaria × ananassa Duch.)	dehydration	Leaf	3	3	2.72043	3.19355	/	/	0.0860215	0.232258	0.142996	3.30861	2.64689	1.11826
DREB2	Li et al., 2021	Strawberry cultivar ‘Honeoye’ (Fragaria × ananassa Duch.)	dehydration	Leaf	3	3	4.01935	4.76774	/	/	0.154839	0.146237	0.122964	6.08625	4.869	1.6255
DREB2	Liu et al., 2017	Wild-type (WT) rice (O. sativa var. Japonica L.) plants (cv. Kitaake)	PEG	Leaf	25	25	1.25786	2.93082	0.477987	0.163522	2.38994	0.81761	1.75001	0.955969	0.940954	0.298084
DREB2	Liu et al., 2017	Wild-type (WT) rice (O. sativa var. Japonica L.) plants (cv. Kitaake)	PEG	Leaf	25	25	1.27044	2.20126	0.138365	0.176101	0.691824	0.880503	0.775806	1.19981	1.18096	0.306507
DREB2	Liu et al., 2017	Wild-type (WT) rice (O. sativa var. Japonica L.) plants (cv. Kitaake)	PEG	Leaf	25	25	1.27044	2.11321	0.289308	0.0628931	1.44654	0.314465	1.0256	0.82173	0.808824	0.29418
DREB2	Liu et al., 2017	Wild-type (WT) rice (O. sativa var. Japonica L.) plants (cv. Kitaake)	PEG	Leaf	25	25	1.25786	2.5283	0.327044	0.188679	1.63522	0.943396	1.30793	0.971333	0.956077	0.298565
DREB2	Liu et al., 2017	Wild-type (WT) rice (O. sativa var. Japonica L.) plants (cv. Kitaake)	PEG	Leaf	25	25	1.25786	3.0566	0.477987	0.188679	2.38994	0.943396	1.78013	1.01046	0.994585	0.29982
DREB2	Matsukura et al., 2010	Rice (Oryza sativa L. cv. Nipponbare)	dehydration	/	3	3	1.26772	1.44882	/	/	0.0551181	0.102362	0.0671218	2.69811	2.15849	1.02709
DREB2	Matsukura et al., 2010	Rice (Oryza sativa L. cv. Nipponbare)	dehydration	/	3	3	0.88189	2.46457	/	/	0.0787402	0.165354	0.105739	14.9678	11.9742	3.55179
DREB2	Matsukura et al., 2010	Rice (Oryza sativa L. cv. Nipponbare)	dehydration	/	3	3	0.669291	3.22047	/	/	0.0787402	0.228346	0.139454	18.2941	14.6353	4.30301
DREB2	Matsukura et al., 2010	Rice (Oryza sativa L. cv. Nipponbare)	dehydration	/	3	3	0.787402	2.37008	/	/	0.0314961	0.0787402	0.0489626	32.3242	25.8594	7.50947
